# Supplementary material for: A Deluge of Complex Repeats: The Solanum Genome
Source: PubMed Central journal article supplement (PMC4524691; doi:10.1371/journal.pone.0133962), 2015-08-04
Supplement: pone.0133962.s005.pdf [file pone.0133962.s005.pdf]

20

40

60

|                                |                   |                   |                   |                   |                   |                   |                      |
|--------------------------------|-------------------|-------------------|-------------------|-------------------|-------------------|-------------------|----------------------|
| Stu-rnd-1_family-417_LINE_RTE  | -----             | -----             | -----             | -----             | -----             | -----             | -----                |
| Sly-rnd1_family377-LINE/RTEBov | -----             | -----             | -----             | -----             | -----             | -----             | -----                |
| Stu-rnd-1_family-489_LINE_RTE  | -----             | -----             | -----             | -----             | -----             | -----             | -----                |
| Stu-rnd-1_family-607_LINE_RTE  | -----             | -----             | -----             | -----             | -----             | -----             | -----                |
| Stu-rnd-1_family-645_LINE_RTE  | -----             | -----             | -----             | -----             | -----             | -----             | -----                |
| Sly-rnd4_family81-LINE/RTEBovB | -----             | -----             | -----             | -----             | -----             | -----             | -----                |
| Stu-rnd-6_family-408_LINE_RTE  | -----             | -----             | -----             | -----             | -----             | -----             | -----                |
| Stu-rnd-1_family-351_LINE_RTE  | -----             | -----             | -----             | -----             | -----             | -----             | -----                |
| Stu-rnd-1_family-382_LINE_RTE  | -----             | -----             | -----             | -----             | -----             | -----             | -----                |
| Sly-rnd6_family746-LINE/RTEBov | -----             | -----             | -----             | -----             | -----             | -----             | -----                |
| Stu-rnd-5_family-325_LINE_RTE  | -----             | -----             | -----             | -----             | -----             | -----             | -----                |
| Sly-rnd4_family509-LINE/RTEBov | -----             | -----             | -----             | -----             | -----             | -----             | -----                |
| Stu-rnd-1_family-513_LINE_RTE  | -----             | -----             | -----             | -----             | -----             | -----             | -----                |
| Sly-rnd5_family1442-LINE/RTEBo | -----             | -----             | -----             | -----             | -----             | -----             | -----                |
| BovB_GI-RTE-Gehyra_lazelli     | -----             | -----             | -----             | -----             | -----             | -----             | -----                |
| BovB_Gv-RTE-Gehyra_variegata   | -----             | -----             | -----             | -----             | -----             | -----             | -----                |
| BovB_PMo-RTE-Python_molurus    | -----             | -----             | -----             | -----             | -----             | -----             | -----                |
| BovB_Oa-RTE-Ovis_aries         | -----             | -----             | -----             | -----             | -----             | -----             | -----                |
| BovB-RTE-Bos_taurus            | <b>GCGCAGGCGG</b> | <b>CTGGGACGGG</b> | <b>CGCGCTAAGC</b> | <b>GCGGCCGAGA</b> | <b>GGAGCCACCC</b> | <b>CACGTCCGAG</b> | <b>GTCAGGGGCA</b> 70 |
| BovB_Me-RTE-Macropus_eugenii   | -----             | -----             | -----             | -----             | -----             | -----             | -----                |
| BovB_Ano-RTE-Amphibolurus_norr | -----             | -----             | -----             | -----             | -----             | -----             | -----                |
| BovB_Gd-RTE-Eremiascincus_doug | -----             | -----             | -----             | -----             | -----             | -----             | -----                |
| BovB_Er-RTE-Eremiascincus_rich | -----             | -----             | -----             | -----             | -----             | -----             | -----                |
| BovB_Ca-RTE-Ctenotus_atlas     | -----             | -----             | -----             | -----             | -----             | -----             | -----                |
| BovB_Es-RTE-Egernia_stokesii   | -----             | -----             | -----             | -----             | -----             | -----             | -----                |
| BovB_Tr-RTE-Tiliqua_rugosa     | -----             | -----             | -----             | -----             | -----             | -----             | -----                |
| BovB_ALi-RTE-Amblyomma_limbatu | -----             | -----             | -----             | -----             | -----             | -----             | -----                |
| BovB_Hs-RTE-Hydrophis_spiralis | -----             | -----             | -----             | -----             | -----             | -----             | -----                |
| BovB_VA-RTE-Vipera_ammodytes   | -----             | -----             | -----             | -----             | -----             | -----             | -----                |
| BovB_ACo-RTE-Agkistrodon_conto | -----             | -----             | -----             | -----             | -----             | -----             | -----                |
| BovB_Pg-RTE-Perameles_gunnii   | -----             | -----             | -----             | -----             | -----             | -----             | -----                |
| BovB_lo-RTE-Isodon_obesulus    | -----             | -----             | -----             | -----             | -----             | -----             | -----                |
| BovB_Bp-RTE-Burramys_parvus    | -----             | -----             | -----             | -----             | -----             | -----             | -----                |
| BovB_Pb-RTE-Petaurus_breviceps | -----             | -----             | -----             | -----             | -----             | -----             | -----                |
| BovB_Ma-RTE-Macropus_antilopin | -----             | -----             | -----             | -----             | -----             | -----             | -----                |
| BovB_Af-RTE-Antechinus_flavipe | -----             | -----             | -----             | -----             | -----             | -----             | -----                |
| BovB_Ac-RTE-Anolis_carolinensi | -----             | -----             | -----             | -----             | -----             | -----             | -----                |
| BovB_BM-RTE-Bombyx_mori        | -----             | -----             | -----             | -----             | -----             | -----             | -----                |
| BovB_Dr-RTE-Christinus         | -----             | -----             | -----             | -----             | -----             | -----             | -----                |
| BovB_La-RTE-Loxodonta_africana | -----             | -----             | -----             | -----             | -----             | -----             | -----                |
| BovB_Pc-RTE-Procavia_capensis  | -----             | -----             | -----             | -----             | -----             | -----             | -----                |
| BovB_Et-RTE-Christinus         | -----             | -----             | -----             | -----             | -----             | -----             | -----                |
| BovB_Ta-RTE-Tachyglossus_acule | -----             | -----             | -----             | -----             | -----             | -----             | -----                |
| BovB_Plat-RTE-Ornithorhynchus  | -----             | -----             | -----             | -----             | -----             | -----             | -----                |
| BovB_Ec-RTE-Equus_caballus     | -----             | -----             | -----             | -----             | -----             | -----             | -----                |
| BovB_Cg-RTE-Christinus         | -----             | -----             | -----             | -----             | -----             | -----             | -----                |
| BovB_Bh-RTE-Bothriocroton_hydr | -----             | -----             | -----             | -----             | -----             | -----             | -----                |
| BovB_MI-RTE-Gehyra_variegata   | -----             | -----             | -----             | -----             | -----             | -----             | -----                |
| Sly-rnd1_family284-LINE/RTEBov | -----             | -----             | -----             | -----             | -----             | -----             | -----                |
| Sly-rnd5_family2019-LINE/RTEBo | -----             | -----             | -----             | -----             | -----             | -----             | -----                |
| Sly-rnd3_family322-LINE/RTEBov | -----             | -----             | -----             | -----             | -----             | -----             | -----                |
| Sly-rnd5_family1698-LINE/RTEBo | -----             | -----             | -----             | -----             | -----             | -----             | -----                |
| Sly-rnd1_family795-LINE/RTEBov | -----             | -----             | -----             | -----             | -----             | -----             | -----                |
| Stu-rnd-5_family-3162_LINE_RTE | -----             | -----             | -----             | -----             | -----             | -----             | -----                |
| Sly-rnd6_family1960-LINE/RTEBo | -----             | -----             | -----             | -----             | -----             | -----             | -----                |
| Stu-rnd-5_family-2493_LINE_RTE | -----             | -----             | -----             | -----             | -----             | -----             | -----                |
| Sly-rnd5_family447-LINE/RTEBov | -----             | -----             | -----             | -----             | -----             | -----             | -----                |
| Stu-rnd-6_family-2093_LINE_RTE | -----             | -----             | -----             | -----             | -----             | -----             | -----                |
| Consensus                      | -----             | -----             | -----             | -----             | -----             | -----             | -----                |

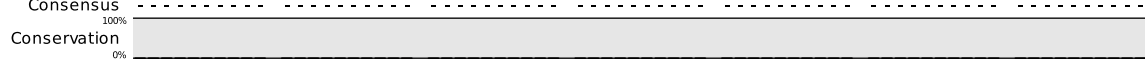

|                                | 80         | 100        | 120        | 140        |            |            |            |     |
|--------------------------------|------------|------------|------------|------------|------------|------------|------------|-----|
| Stu-rnd-1_family-417_LINE_RTE- |            |            |            |            |            |            |            |     |
| Sly-rnd1_family377-LINE/RTEBov |            |            |            |            |            |            |            |     |
| Stu-rnd-1_family-489_LINE_RTE- |            |            |            |            |            |            |            |     |
| Stu-rnd-1_family-607_LINE_RTE- |            |            |            |            |            |            |            |     |
| Stu-rnd-1_family-645_LINE_RTE- |            |            |            |            |            |            |            |     |
| Sly-rnd4_family81-LINE/RTEBovB |            |            |            |            |            |            |            |     |
| Stu-rnd-6_family-408_LINE_RTE- |            |            |            |            |            |            |            |     |
| Stu-rnd-1_family-351_LINE_RTE- |            |            |            |            |            |            |            |     |
| Stu-rnd-1_family-382_LINE_RTE- |            |            |            |            |            |            |            |     |
| Sly-rnd6_family746-LINE/RTEBov |            |            |            |            |            |            |            |     |
| Stu-rnd-5_family-325_LINE_RTE- |            |            |            |            |            |            |            |     |
| Sly-rnd4_family509-LINE/RTEBov |            |            |            |            |            |            |            |     |
| Stu-rnd-1_family-513_LINE_RTE- |            |            |            |            |            |            |            |     |
| Sly-rnd5_family1442-LINE/RTEBo |            |            |            |            |            |            |            |     |
| BovB_GI-RTE-Gehyra_lazelli     |            |            |            |            |            |            |            |     |
| BovB_Gv-RTE-Gehyra_variegata   |            |            |            |            |            |            |            |     |
| BovB_PMo-RTE-Python_molurus    |            |            |            |            |            |            |            |     |
| BovB_Oa-RTE-Ovis_aries         |            |            |            |            |            |            |            |     |
| BovB-RTE-Bos_taurus            | GAAGCCGGGA | GGACCCCATG | CCCGAAGGGC | GGCGGCCAAG | AGGAGTTACC | CCACGTCCGA | GGTCAGGGGC | 140 |
| BovB_Me-RTE-Macropus_eugenii   |            |            |            |            |            |            |            |     |
| BovB_Ano-RTE-Amphibolurus_norr |            |            |            |            |            |            |            |     |
| BovB_Gd-RTE-Eremiascincus_doug |            |            |            |            |            |            |            |     |
| BovB_Er-RTE-Eremiascincus_rich |            |            |            |            |            |            |            |     |
| BovB_Ca-RTE-Ctenotus_atlas     |            |            |            |            |            |            |            |     |
| BovB_Es-RTE-Egernia_stokesii   |            |            |            |            |            |            |            |     |
| BovB_Tr-RTE-Tiliqua_rugosa     |            |            |            |            |            |            |            |     |
| BovB_ALi-RTE-Amblyomma_limbatu |            |            |            |            |            |            |            |     |
| BovB_Hs-RTE-Hydrophis_spiralis |            |            |            |            |            |            |            |     |
| BovB_VA-RTE-Vipera_ammodytes   |            |            |            |            |            |            |            |     |
| BovB_ACo-RTE-Agkistrodon_conto |            |            |            |            |            |            |            |     |
| BovB_Pg-RTE-Perameles_gunnii   |            |            |            |            |            |            |            |     |
| BovB_lo-RTE-Isodon_obesulus    |            |            |            |            |            |            |            |     |
| BovB_Bp-RTE-Burramys_parvus    |            |            |            |            |            |            |            |     |
| BovB_Pb-RTE-Petaurus_breviceps |            |            |            |            |            |            |            |     |
| BovB_Ma-RTE-Macropus_antilopin |            |            |            |            |            |            |            |     |
| BovB_Af-RTE-Antechinus_flavipe |            |            |            |            |            |            |            |     |
| BovB_Ac-RTE-Anolis_carolinensi |            |            |            |            |            |            |            |     |
| BovB_BM-RTE-Bombyx_mori        |            |            |            |            |            |            |            |     |
| BovB_Dr-RTE-Christinus         |            |            |            |            |            |            |            |     |
| BovB_La-RTE-Loxodonta_africana |            |            |            |            |            |            |            |     |
| BovB_Pc-RTE-Procavia_capensis  |            |            |            |            |            |            |            |     |
| BovB_Et-RTE-Christinus         |            |            |            |            |            |            |            |     |
| BovB_Ta-RTE-Tachyglossus_acule |            |            |            |            |            |            |            |     |
| BovB_Plat-RTE-Ornithorhynchus  |            |            |            |            |            |            |            |     |
| BovB_Ec-RTE-Equus_caballus     |            |            |            |            |            |            |            |     |
| BovB_Cg-RTE-Christinus         |            |            |            |            |            |            |            |     |
| BovB_Bh-RTE-Bothriocroton_hydr |            |            |            |            |            |            |            |     |
| BovB_MI-RTE-Gehyra_variegata   |            |            |            |            |            |            |            |     |
| Sly-rnd1_family284-LINE/RTEBov |            |            |            |            |            |            |            |     |
| Sly-rnd5_family2019-LINE/RTEBo |            |            |            |            |            |            |            |     |
| Sly-rnd3_family322-LINE/RTEBov |            |            |            |            |            |            |            |     |
| Sly-rnd5_family1698-LINE/RTEBo |            |            |            |            |            |            |            |     |
| Sly-rnd1_family795-LINE/RTEBov |            |            |            |            |            |            |            |     |
| Stu-rnd-5_family-3162_LINE_RTE |            |            |            |            |            |            |            |     |
| Sly-rnd6_family1960-LINE/RTEBo |            |            |            |            |            |            |            |     |
| Stu-rnd-5_family-2493_LINE_RTE |            |            |            |            |            |            |            |     |
| Sly-rnd5_family447-LINE/RTEBov |            |            |            |            |            |            |            |     |
| Stu-rnd-6_family-2093_LINE_RTE |            |            |            |            |            |            |            |     |
| Consensus                      |            |            |            |            |            |            |            |     |
| Conservation                   |            |            |            |            |            |            |            |     |

|                                | 160        | 180        | 200        |            |
|--------------------------------|------------|------------|------------|------------|
| Stu-rnd-1_family-417_LINE_RTE  |            |            |            |            |
| Sly-rnd1_family377-LINE/RTEBov |            |            |            |            |
| Stu-rnd-1_family-489_LINE_RTE  |            |            |            |            |
| Stu-rnd-1_family-607_LINE_RTE  |            |            |            |            |
| Stu-rnd-1_family-645_LINE_RTE  |            |            |            |            |
| Sly-rnd4_family81-LINE/RTEBovB |            |            |            |            |
| Stu-rnd-6_family-408_LINE_RTE  |            |            |            |            |
| Stu-rnd-1_family-351_LINE_RTE  |            |            |            |            |
| Stu-rnd-1_family-382_LINE_RTE  |            |            |            |            |
| Sly-rnd6_family746-LINE/RTEBov |            |            |            |            |
| Stu-rnd-5_family-325_LINE_RTE  |            |            |            |            |
| Sly-rnd4_family509-LINE/RTEBov |            |            |            |            |
| Stu-rnd-1_family-513_LINE_RTE  |            |            |            |            |
| Sly-rnd5_family1442-LINE/RTEBo |            |            |            |            |
| BovB_GI-RTE-Gehyra_lazelli     |            |            |            |            |
| BovB_Gv-RTE-Gehyra_variegata   |            |            |            |            |
| BovB_PMo-RTE-Python_molurus    |            |            |            |            |
| BovB_Oa-RTE-Ovis_aries         |            |            |            |            |
| BovB-RTE-Bos_taurus            | AGCGGCCGAG | AGTACCAGAC | TGCGACGGCG | CAGGAACGGC |
| BovB_Me-RTE-Macropus_eugenii   | CGAGAGGAGC | TACCCCGCGT | CCGAGGTCAG | 210        |
| BovB_Ano-RTE-Amphibolurus_norr |            |            |            |            |
| BovB_Gd-RTE-Eremiascincus_doug |            |            |            |            |
| BovB_Er-RTE-Eremiascincus_rich |            |            |            |            |
| BovB_Ca-RTE-Ctenotus_atlas     |            |            |            |            |
| BovB_Es-RTE-Egernia_stokesii   |            |            |            |            |
| BovB_Tr-RTE-Tiliqua_rugosa     |            |            |            |            |
| BovB_ALi-RTE-Amblyomma_limbatu |            |            |            |            |
| BovB_Hs-RTE-Hydrophis_spiralis |            |            |            |            |
| BovB_VA-RTE-Vipera_ammodytes   |            |            |            |            |
| BovB_ACo-RTE-Agkistrodon_conto |            |            |            |            |
| BovB_Pg-RTE-Perameles_gunnii   |            |            |            |            |
| BovB_lo-RTE-Isodon_obesulus    |            |            |            |            |
| BovB_Bp-RTE-Burramys_parvus    |            |            |            |            |
| BovB_Pb-RTE-Petaurus_breviceps |            |            |            |            |
| BovB_Ma-RTE-Macropus_antilopin |            |            |            |            |
| BovB_Af-RTE-Antechinus_flavipe |            |            |            |            |
| BovB_Ac-RTE-Anolis_carolinensi |            |            |            |            |
| BovB_BM-RTE-Bombyx_mori        |            |            |            |            |
| BovB_Dr-RTE-Christinus         |            |            |            |            |
| BovB_La-RTE-Loxodonta_africana |            |            |            |            |
| BovB_Pc-RTE-Procavia_capensis  |            |            |            |            |
| BovB_Et-RTE-Christinus         |            |            |            |            |
| BovB_Ta-RTE-Tachyglossus_acule |            |            |            |            |
| BovB_Plat-RTE-Ornithorhynchus  |            |            |            |            |
| BovB_Ec-RTE-Equus_caballus     |            |            |            |            |
| BovB_Cg-RTE-Christinus         |            |            |            |            |
| BovB_Bh-RTE-Bothriocroton_hydr |            |            |            |            |
| BovB_MI-RTE-Gehyra_variegata   |            |            |            |            |
| Sly-rnd1_family284-LINE/RTEBov |            |            |            |            |
| Sly-rnd5_family2019-LINE/RTEBo |            |            |            |            |
| Sly-rnd3_family322-LINE/RTEBov |            |            |            |            |
| Sly-rnd5_family1698-LINE/RTEBo |            |            |            |            |
| Sly-rnd1_family795-LINE/RTEBov |            |            |            |            |
| Stu-rnd-5_family-3162_LINE_RTE |            |            |            |            |
| Sly-rnd6_family1960-LINE/RTEBo |            |            |            |            |
| Stu-rnd-5_family-2493_LINE_RTE |            |            |            |            |
| Sly-rnd5_family447-LINE/RTEBov |            |            |            |            |
| Stu-rnd-6_family-2093_LINE_RTE |            |            |            |            |
| Consensus                      |            |            |            |            |
| Conservation                   |            |            |            |            |
| 100%                           |            |            |            |            |
| 0%                             |            |            |            |            |

|                                | 220        | 240        | 260        | 280        |
|--------------------------------|------------|------------|------------|------------|
| Stu-rnd-1_family-417_LINE_RTE- |            |            |            |            |
| Sly-rnd1_family377-LINE/RTEBov |            |            |            |            |
| Stu-rnd-1_family-489_LINE_RTE- |            |            |            |            |
| Stu-rnd-1_family-607_LINE_RTE- |            |            |            |            |
| Stu-rnd-1_family-645_LINE_RTE- |            |            |            |            |
| Sly-rnd4_family81-LINE/RTEBovB |            |            |            |            |
| Stu-rnd-6_family-408_LINE_RTE- |            |            |            |            |
| Stu-rnd-1_family-351_LINE_RTE- |            |            |            |            |
| Stu-rnd-1_family-382_LINE_RTE- |            |            |            |            |
| Sly-rnd6_family746-LINE/RTEBov |            |            |            |            |
| Stu-rnd-5_family-325_LINE_RTE- |            |            |            |            |
| Sly-rnd4_family509-LINE/RTEBov |            |            |            |            |
| Stu-rnd-1_family-513_LINE_RTE- |            |            |            |            |
| Sly-rnd5_family1442-LINE/RTEBo |            |            |            |            |
| BovB_GI-RTE-Gehyra_lazelli     |            |            |            |            |
| BovB_Gv-RTE-Gehyra_variegata   |            |            |            |            |
| BovB_PMo-RTE-Python_molurus    |            |            |            |            |
| BovB_Oa-RTE-Ovis_aries         |            |            |            |            |
| BovB-RTE-Bos_taurus            | GGGGGGCGGC | CGAGAGGAGA | TACCCAGCGT | CCGAGGTCAG |
| BovB_Me-RTE-Macropus_eugenii   |            |            |            |            |
| BovB_Ano-RTE-Amphibolurus_norr |            |            |            |            |
| BovB_Gd-RTE-Eremiascincus_doug |            |            |            |            |
| BovB_Er-RTE-Eremiascincus_rich |            |            |            |            |
| BovB_Ca-RTE-Ctenotus_atlas     |            |            |            |            |
| BovB_Es-RTE-Egernia_stokesii   |            |            |            |            |
| BovB_Tr-RTE-Tiliqua_rugosa     |            |            |            |            |
| BovB_ALi-RTE-Amblyomma_limbato |            |            |            |            |
| BovB_Hs-RTE-Hydrophis_spiralis |            |            |            |            |
| BovB_VA-RTE-Vipera_ammodytes   |            |            |            |            |
| BovB_ACo-RTE-Agkistrodon_conto |            |            |            |            |
| BovB_Pg-RTE-Perameles_gunnii   |            |            |            |            |
| BovB_lo-RTE-Isodon_obesulus    |            |            |            |            |
| BovB_Bp-RTE-Burramys_parvus    |            |            |            |            |
| BovB_Pb-RTE-Petaurus_breviceps |            |            |            |            |
| BovB_Ma-RTE-Macropus_antilopin |            |            |            |            |
| BovB_Af-RTE-Antechinus_flavipe |            |            |            |            |
| BovB_Ac-RTE-Anolis_carolinensi |            |            |            |            |
| BovB_BM-RTE-Bombyx_mori        |            |            |            |            |
| BovB_Dr-RTE-Christinus         |            |            |            |            |
| BovB_La-RTE-Loxodonta_africana |            |            |            |            |
| BovB_Pc-RTE-Procavia_capensis  |            |            |            |            |
| BovB_Et-RTE-Christinus         |            |            |            |            |
| BovB_Ta-RTE-Tachyglossus_acule |            |            |            |            |
| BovB_Plat-RTE-Ornithorhynchus  |            |            |            |            |
| BovB_Ec-RTE-Equus_caballus     |            |            |            |            |
| BovB_Cg-RTE-Christinus         |            |            |            |            |
| BovB_Bh-RTE-Bothriocroton_hydr |            |            |            |            |
| BovB_MI-RTE-Gehyra_variegata   |            |            |            |            |
| Sly-rnd1_family284-LINE/RTEBov |            |            |            |            |
| Sly-rnd5_family2019-LINE/RTEBo |            |            |            |            |
| Sly-rnd3_family322-LINE/RTEBov |            |            |            |            |
| Sly-rnd5_family1698-LINE/RTEBo |            |            |            |            |
| Sly-rnd1_family795-LINE/RTEBov |            |            |            |            |
| Stu-rnd-5_family-3162_LINE_RTE |            |            |            |            |
| Sly-rnd6_family1960-LINE/RTEBo |            |            |            |            |
| Stu-rnd-5_family-2493_LINE_RTE |            |            |            |            |
| Sly-rnd5_family447-LINE/RTEBov |            |            |            |            |
| Stu-rnd-6_family-2093_LINE_RTE |            |            |            |            |
| Consensus                      |            |            |            |            |
| Conservation                   |            |            |            |            |



|                                | 300        | 320        | 340        |            |
|--------------------------------|------------|------------|------------|------------|
| Stu-rnd-1_family-417_LINE_RTE  |            |            |            |            |
| Sly-rnd1_family377-LINE/RTEBov |            |            |            |            |
| Stu-rnd-1_family-489_LINE_RTE  |            |            |            |            |
| Stu-rnd-1_family-607_LINE_RTE  |            |            |            |            |
| Stu-rnd-1_family-645_LINE_RTE  |            |            |            |            |
| Sly-rnd4_family81-LINE/RTEBovB |            |            |            |            |
| Stu-rnd-6_family-408_LINE_RTE  |            |            |            |            |
| Stu-rnd-1_family-351_LINE_RTE  |            |            |            |            |
| Stu-rnd-1_family-382_LINE_RTE  |            |            |            |            |
| Sly-rnd6_family746-LINE/RTEBov |            |            |            |            |
| Stu-rnd-5_family-325_LINE_RTE  |            |            |            |            |
| Sly-rnd4_family509-LINE/RTEBov |            |            |            |            |
| Stu-rnd-1_family-513_LINE_RTE  |            |            |            |            |
| Sly-rnd5_family1442-LINE/RTEBo |            |            |            |            |
| BovB_GI-RTE-Gehyra_lazelli     |            |            |            |            |
| BovB_Gv-RTE-Gehyra_variegata   |            |            |            |            |
| BovB_PMo-RTE-Python_molurus    |            |            |            |            |
| BovB_Oa-RTE-Ovis_aries         |            |            |            |            |
| BovB-RTE-Bos_taurus            | CGAGGTCAGG | GGCGGCGGCC | GGGAGGAGCT | ACCCCAGGCC |
| BovB_Me-RTE-Macropus_eugenii   |            |            |            |            |
| BovB_Ano-RTE-Amphibolurus_norr |            |            |            |            |
| BovB_Gd-RTE-Eremiascincus_doug |            |            |            |            |
| BovB_Er-RTE-Eremiascincus_rich |            |            |            |            |
| BovB_Ca-RTE-Ctenotus_atlas     |            |            |            |            |
| BovB_Es-RTE-Egernia_stokesii   |            |            |            |            |
| BovB_Tr-RTE-Tiliqua_rugosa     |            |            |            |            |
| BovB_ALi-RTE-Amblyomma_limbatu |            |            |            |            |
| BovB_Hs-RTE-Hydrophis_spiralis |            |            |            |            |
| BovB_VA-RTE-Vipera_ammodytes   |            |            |            |            |
| BovB_ACo-RTE-Agkistrodon_conto |            |            |            |            |
| BovB_Pg-RTE-Perameles_gunnii   |            |            |            |            |
| BovB_lo-RTE-Isodon_obesulus    |            |            |            |            |
| BovB_Bp-RTE-Burramys_parvus    |            |            |            |            |
| BovB_Pb-RTE-Petaurus_breviceps |            |            |            |            |
| BovB_Ma-RTE-Macropus_antilopin |            |            |            |            |
| BovB_Af-RTE-Antechinus_flavipe |            |            |            |            |
| BovB_Ac-RTE-Anolis_carolinensi |            |            |            |            |
| BovB_BM-RTE-Bombyx_mori        |            |            |            |            |
| BovB_Dr-RTE-Christinus         |            |            |            |            |
| BovB_La-RTE-Loxodonta_africana |            |            |            |            |
| BovB_Pc-RTE-Procavia_capensis  |            |            |            |            |
| BovB_Et-RTE-Christinus         |            |            |            |            |
| BovB_Ta-RTE-Tachyglossus_acule |            |            |            |            |
| BovB_Plat-RTE-Ornithorhynchus  |            |            |            |            |
| BovB_Ec-RTE-Equus_caballus     |            |            |            |            |
| BovB_Cg-RTE-Christinus         |            |            |            |            |
| BovB_Bh-RTE-Bothriocroton_hydr |            |            |            |            |
| BovB_MI-RTE-Gehyra_variegata   |            |            |            |            |
| Sly-rnd1_family284-LINE/RTEBov |            |            |            |            |
| Sly-rnd5_family2019-LINE/RTEBo |            |            |            |            |
| Sly-rnd3_family322-LINE/RTEBov |            |            |            |            |
| Sly-rnd5_family1698-LINE/RTEBo |            |            |            |            |
| Sly-rnd1_family795-LINE/RTEBov |            |            |            |            |
| Stu-rnd-5_family-3162_LINE_RTE |            |            |            |            |
| Sly-rnd6_family1960-LINE/RTEBo |            |            |            |            |
| Stu-rnd-5_family-2493_LINE_RTE |            |            |            |            |
| Sly-rnd5_family447-LINE/RTEBov |            |            |            |            |
| Stu-rnd-6_family-2093_LINE_RTE |            |            |            |            |
| Consensus                      |            |            |            |            |
| Conservation                   |            |            |            |            |

350

|                                | 360        | 380        | 400        | 420        |            |            |            |     |
|--------------------------------|------------|------------|------------|------------|------------|------------|------------|-----|
| Stu-rnd-1_family-417_LINE_RTE- |            |            |            |            |            |            |            |     |
| Sly-rnd1_family377-LINE/RTEBov |            |            |            |            |            |            |            |     |
| Stu-rnd-1_family-489_LINE_RTE- |            |            |            |            |            |            |            |     |
| Stu-rnd-1_family-607_LINE_RTE- |            |            |            |            |            |            |            |     |
| Stu-rnd-1_family-645_LINE_RTE- |            |            |            |            |            |            |            |     |
| Sly-rnd4_family81-LINE/RTEBovB |            |            |            |            |            |            |            |     |
| Stu-rnd-6_family-408_LINE_RTE- |            |            |            |            |            |            |            |     |
| Stu-rnd-1_family-351_LINE_RTE- |            |            |            |            |            |            |            |     |
| Stu-rnd-1_family-382_LINE_RTE- |            |            |            |            |            |            |            |     |
| Sly-rnd6_family746-LINE/RTEBov |            |            |            |            |            |            |            |     |
| Stu-rnd-5_family-325_LINE_RTE- |            |            |            |            |            |            |            |     |
| Sly-rnd4_family509-LINE/RTEBov |            |            |            |            |            |            |            |     |
| Stu-rnd-1_family-513_LINE_RTE- |            |            |            |            |            |            |            |     |
| Sly-rnd5_family1442-LINE/RTEBo |            |            |            |            |            |            |            |     |
| BovB_GI-RTE-Gehyra_lazelli     |            |            |            |            |            |            |            |     |
| BovB_Gv-RTE-Gehyra_variegata   |            |            |            |            |            |            |            |     |
| BovB_PMo-RTE-Python_molurus    |            |            |            |            |            |            |            |     |
| BovB_Oa-RTE-Ovis_aries         |            |            |            |            |            |            |            |     |
| BovB-RTE-Bos_taurus            | GAGGAGCAAC | CCCACGCCCG | AGGCCAGGGG | CGGCGGCCGG | GAGGACCAAC | CCCACGTCCA | AGGAGCCGTG | 420 |
| BovB_Me-RTE-Macropus_eugenii   |            |            |            |            |            |            |            |     |
| BovB_Ano-RTE-Amphibolurus_norr |            |            |            |            |            |            |            |     |
| BovB_Gd-RTE-Eremiascincus_doug |            |            |            |            |            |            |            |     |
| BovB_Er-RTE-Eremiascincus_rich |            |            |            |            |            |            |            |     |
| BovB_Ca-RTE-Ctenotus_atlas     |            |            |            |            |            |            |            |     |
| BovB_Es-RTE-Egernia_stokesii   |            |            |            |            |            |            |            |     |
| BovB_Tr-RTE-Tiliqua_rugosa     |            |            |            |            |            |            |            |     |
| BovB_ALi-RTE-Amblyomma_limbatu |            |            |            |            |            |            |            |     |
| BovB_Hs-RTE-Hydrophis_spiralis |            |            |            |            |            |            |            |     |
| BovB_VA-RTE-Vipera_ammodytes   |            |            |            |            |            |            |            |     |
| BovB_ACo-RTE-Agkistrodon_conto |            |            |            |            |            |            |            |     |
| BovB_Pg-RTE-Perameles_gunnii   |            |            |            |            |            |            |            |     |
| BovB_lo-RTE-Isodon_obesulus    |            |            |            |            |            |            |            |     |
| BovB_Bp-RTE-Burramys_parvus    |            |            |            |            |            |            |            |     |
| BovB_Pb-RTE-Petaurus_breviceps |            |            |            |            |            |            |            |     |
| BovB_Ma-RTE-Macropus_antilopin |            |            |            |            |            |            |            |     |
| BovB_Af-RTE-Antechinus_flavipe |            |            |            |            |            |            |            |     |
| BovB_Ac-RTE-Anolis_carolinensi |            |            |            |            |            |            |            |     |
| BovB_BM-RTE-Bombyx_mori        |            |            |            |            |            |            |            |     |
| BovB_Dr-RTE-Christinus         |            |            |            |            |            |            |            |     |
| BovB_La-RTE-Loxodonta_africana |            |            |            |            |            |            |            |     |
| BovB_Pc-RTE-Procavia_capensis  |            |            |            |            |            |            |            |     |
| BovB_Et-RTE-Christinus         |            |            |            |            |            |            |            |     |
| BovB_Ta-RTE-Tachyglossus_acule |            |            |            |            |            |            |            |     |
| BovB_Plat-RTE-Ornithorhynchus  |            |            |            |            |            |            |            |     |
| BovB_Ec-RTE-Equus_caballus     |            |            |            |            |            |            |            |     |
| BovB_Cg-RTE-Christinus         |            |            |            |            |            |            |            |     |
| BovB_Bh-RTE-Bothriocroton_hydr |            |            |            |            |            |            |            |     |
| BovB_MI-RTE-Gehyra_variegata   |            |            |            |            |            |            |            |     |
| Sly-rnd1_family284-LINE/RTEBov |            |            |            |            |            |            |            |     |
| Sly-rnd5_family2019-LINE/RTEBo |            |            |            |            |            |            |            |     |
| Sly-rnd3_family322-LINE/RTEBov |            |            |            |            |            |            |            |     |
| Sly-rnd5_family1698-LINE/RTEBo |            |            |            |            |            |            |            |     |
| Sly-rnd1_family795-LINE/RTEBov |            |            |            |            |            |            |            |     |
| Stu-rnd-5_family-3162_LINE_RTE |            |            |            |            |            |            |            |     |
| Sly-rnd6_family1960-LINE/RTEBo |            |            |            |            |            |            |            |     |
| Stu-rnd-5_family-2493_LINE_RTE |            |            |            |            |            |            |            |     |
| Sly-rnd5_family447-LINE/RTEBov |            |            |            |            |            |            |            |     |
| Stu-rnd-6_family-2093_LINE_RTE |            |            |            |            |            |            |            |     |
| Consensus                      |            |            |            |            |            |            |            |     |
| Conservation                   |            |            |            |            |            |            |            |     |
|                                | 100%       |            |            |            |            |            |            |     |
|                                | 0%         |            |            |            |            |            |            |     |

|                                | 440        | 460        | 480        |                                                 |
|--------------------------------|------------|------------|------------|-------------------------------------------------|
| Stu-rnd-1_family-417_LINE RTE  |            |            |            |                                                 |
| Sly-rnd1_family377-LINE/RTEBov |            |            |            |                                                 |
| Stu-rnd-1_family-489_LINE RTE  |            |            |            |                                                 |
| Stu-rnd-1_family-607_LINE RTE  |            |            |            |                                                 |
| Stu-rnd-1_family-645_LINE RTE  |            |            |            |                                                 |
| Sly-rnd4_family81-LINE/RTEBovB |            |            |            |                                                 |
| Stu-rnd-6_family-408_LINE RTE  |            |            |            |                                                 |
| Stu-rnd-1_family-351_LINE RTE  |            |            |            |                                                 |
| Stu-rnd-1_family-382_LINE RTE  |            |            |            |                                                 |
| Sly-rnd6_family746-LINE/RTEBov |            |            |            |                                                 |
| Stu-rnd-5_family-325_LINE RTE  |            |            |            |                                                 |
| Sly-rnd4_family509-LINE/RTEBov |            |            |            |                                                 |
| Stu-rnd-1_family-513_LINE RTE  |            |            |            |                                                 |
| Sly-rnd5_family1442-LINE/RTEBo |            |            |            |                                                 |
| BovB_GI-RTE-Gehyra_lazelli     |            |            |            |                                                 |
| BovB_Gv-RTE-Gehyra_variegata   |            |            |            |                                                 |
| BovB_PMo-RTE-Python_molurus    |            |            |            |                                                 |
| BovB_Oa-RTE-Ovis_aries         |            |            |            |                                                 |
| BovB-RTE-Bos_taurus            | GCTGCGCGGG | CACAGGAGGG | CCTAGAGGAG | CTATCCCACG TTGAAGGTCA GGAAGGGCGG CCGTGAGGAG 490 |
| BovB_Me-RTE-Macropus_eugenii   |            |            |            |                                                 |
| BovB_Ano-RTE-Amphibolurus_norr |            |            |            |                                                 |
| BovB_Gd-RTE-Eremiascincus_doug |            |            |            |                                                 |
| BovB_Er-RTE-Eremiascincus_rich |            |            |            |                                                 |
| BovB_Ca-RTE-Ctenotus_atlas     |            |            |            |                                                 |
| BovB_Es-RTE-Egernia_stokesii   |            |            |            |                                                 |
| BovB_Tr-RTE-Tiliqua_rugosa     |            |            |            |                                                 |
| BovB_ALi-RTE-Amblyomma_limbatu |            |            |            |                                                 |
| BovB_Hs-RTE-Hydrophis_spiralis |            |            |            |                                                 |
| BovB_VA-RTE-Vipera_ammodytes   |            |            |            |                                                 |
| BovB_ACo-RTE-Agkistrodon_conto |            |            |            |                                                 |
| BovB_Pg-RTE-Perameles_gunnii   |            |            |            |                                                 |
| BovB_lo-RTE-Isodon_obesulus    |            |            |            |                                                 |
| BovB_Bp-RTE-Burramys_parvus    |            |            |            |                                                 |
| BovB_Pb-RTE-Petaurus_breviceps |            |            |            |                                                 |
| BovB_Ma-RTE-Macropus_antilopin |            |            |            |                                                 |
| BovB_Af-RTE-Antechinus_flavipe |            |            |            |                                                 |
| BovB_Ac-RTE-Anolis_carolinensi |            |            |            |                                                 |
| BovB_BM-RTE-Bombyx_mori        |            |            |            |                                                 |
| BovB_Dr-RTE-Christinus         |            |            |            |                                                 |
| BovB_La-RTE-Loxodonta_africana |            |            |            |                                                 |
| BovB_Pc-RTE-Procavia_capensis  |            |            |            |                                                 |
| BovB_Et-RTE-Christinus         |            |            |            |                                                 |
| BovB_Ta-RTE-Tachyglossus_acule |            |            |            |                                                 |
| BovB_Plat-RTE-Ornithorhynchus  |            |            |            |                                                 |
| BovB_Ec-RTE-Equus_caballus     |            |            |            |                                                 |
| BovB_Cg-RTE-Christinus         |            |            |            |                                                 |
| BovB_Bh-RTE-Bothriocroton_hydr |            |            |            |                                                 |
| BovB_MI-RTE-Gehyra_variegata   |            |            |            |                                                 |
| Sly-rnd1_family284-LINE/RTEBov |            |            |            |                                                 |
| Sly-rnd5_family2019-LINE/RTEBo |            |            |            |                                                 |
| Sly-rnd3_family322-LINE/RTEBov |            |            |            |                                                 |
| Sly-rnd5_family1698-LINE/RTEBo |            |            |            |                                                 |
| Sly-rnd1_family795-LINE/RTEBov |            |            |            |                                                 |
| Stu-rnd-5_family-3162_LINE RTE |            |            |            |                                                 |
| Sly-rnd6_family1960-LINE/RTEBo |            |            |            |                                                 |
| Stu-rnd-5_family-2493_LINE RTE |            |            |            |                                                 |
| Sly-rnd5_family447-LINE/RTEBov |            |            |            |                                                 |
| Stu-rnd-6_family-2093_LINE RTE |            |            |            |                                                 |
| Consensus                      |            |            |            |                                                 |
| Conservation                   |            |            |            |                                                 |
| 100%                           |            |            |            |                                                 |
| 0%                             |            |            |            |                                                 |

|                                | 500        | 520        | 540        | 560        |            |            |            |     |
|--------------------------------|------------|------------|------------|------------|------------|------------|------------|-----|
| Stu-rnd-1_family-417_LINE_RTE  |            |            |            |            |            |            |            |     |
| Sly-rnd1_family377-LINE/RTEBov |            |            |            |            |            |            |            |     |
| Stu-rnd-1_family-489_LINE_RTE  |            |            |            |            |            |            |            |     |
| Stu-rnd-1_family-607_LINE_RTE  |            |            |            |            |            |            |            |     |
| Stu-rnd-1_family-645_LINE_RTE  |            |            |            |            |            |            |            |     |
| Sly-rnd4_family81-LINE/RTEBovB |            |            |            |            |            |            |            |     |
| Stu-rnd-6_family-408_LINE_RTE  |            |            |            |            |            |            |            |     |
| Stu-rnd-1_family-351_LINE_RTE  |            |            |            |            |            |            |            |     |
| Stu-rnd-1_family-382_LINE_RTE  |            |            |            |            |            |            |            |     |
| Sly-rnd6_family746-LINE/RTEBov |            |            |            |            |            |            |            |     |
| Stu-rnd-5_family-325_LINE_RTE  |            |            |            |            |            |            |            |     |
| Sly-rnd4_family509-LINE/RTEBov |            |            |            |            |            |            |            |     |
| Stu-rnd-1_family-513_LINE_RTE  |            |            |            |            |            |            |            |     |
| Sly-rnd5_family1442-LINE/RTEBo |            |            |            |            |            |            |            |     |
| BovB_GI-RTE-Gehyra_lazelli     |            | TTT        | TCTTTTCTT  | TTTGAGGACA | TCGTCTTTAA | AAAACGTTTC | ATTGAAGGAA | 53  |
| BovB_Gv-RTE-Gehyra_variegata   |            |            |            |            |            |            |            |     |
| BovB_PMo-RTE-Python_molurus    |            |            |            |            |            |            |            |     |
| BovB_Oa-RTE-Ovis_aries         |            |            |            |            |            |            |            |     |
| BovB-RTE-Bos_taurus            | ATACCCCTCG | TCCAAGGTAA | GGAGCAGCGG | CTGCGCTTTG | CTGGAGCAGC | CGTGAAGAGA | TACCCACGC  | 560 |
| BovB_Me-RTE-Macropus_eugenii   |            |            |            |            |            |            |            |     |
| BovB_Ano-RTE-Amphibolurus_norr |            |            |            |            |            |            |            |     |
| BovB_Gd-RTE-Eremiascincus_doug |            |            |            |            |            |            |            |     |
| BovB_Er-RTE-Eremiascincus_rich | GCACAATAGA | -GCAGGCAAG | ATCTGTGCTT | CGCTTCCCG  | TCGTGCTTC  | CCCGGTGTA  | TCGGAACAGC | 116 |
| BovB_Ca-RTE-Ctenotus_atlas     | CCATCTTGAA | CATCTGCTAT | ATTTTGAATG | ATATATTTAA | ATCTGCTATA | TTTTGAGTGA | GGATCATTGC | 108 |
| BovB_Es-RTE-Egernia_stokesii   |            |            |            |            |            |            |            |     |
| BovB_Tr-RTE-Tiliqua_rugosa     |            |            |            |            |            |            |            |     |
| BovB_ALi-RTE-Amblyomma_limbatu |            |            | CCAAGGTAC  | CTTTGAGTGC | CGGATTTATT | TCAGACACAC | GCATCCCTAC | 50  |
| BovB_Hs-RTE-Hydrophis_spiralis |            |            |            |            |            |            |            |     |
| BovB_VA-RTE-Vipera_ammodytes   |            |            |            |            |            |            |            |     |
| BovB_ACo-RTE-Agkistrodon_conto |            |            |            |            |            |            |            |     |
| BovB_Pg-RTE-Perameles_gunnii   |            |            |            |            |            |            |            |     |
| BovB_lo-RTE-Isodon_obesulus    |            |            |            |            |            |            |            |     |
| BovB_Bp-RTE-Burramys_parvulus  |            |            |            |            |            |            |            |     |
| BovB_Pb-RTE-Petaurus_breviceps |            |            |            |            |            |            |            |     |
| BovB_Ma-RTE-Macropus_antilopin |            |            |            |            |            |            |            |     |
| BovB_Af-RTE-Antechinus_flavipe |            |            |            |            |            |            |            |     |
| BovB_Ac-RTE-Anolis_carolinensi |            |            |            |            |            |            |            |     |
| BovB_BM-RTE-Bombyx_mori        |            |            |            |            |            |            |            |     |
| BovB_Dr-RTE-Christinus         |            |            |            |            |            |            |            |     |
| BovB_La-RTE-Loxodonta_africana |            |            |            |            |            |            |            |     |
| BovB_Pc-RTE-Procavia_capensis  |            |            |            |            |            |            |            |     |
| BovB_Et-RTE-Christinus         |            |            |            |            |            |            |            |     |
| BovB_Ta-RTE-Tachyglossus_acule |            |            | ATT        | ATCCTGAAAC | AAAGTTCTCC | AACGAATCAA | TACCTTACCA | 43  |
| BovB_Plat-RTE-Ornithorhynchus  |            |            |            |            | -ACTCTCTCC | TATGAATCAA | CGCCTTACCG | 29  |
| BovB_Ec-RTE-Equus_caballus     |            |            |            |            |            |            |            |     |
| BovB_Cg-RTE-Christinus         |            |            |            |            |            |            |            |     |
| BovB_Bh-RTE-Bothriocroton_hydr |            |            |            |            |            |            |            |     |
| BovB_MI-RTE-Gehyra_variegata   |            |            |            |            |            |            |            |     |
| Sly-rnd1_family284-LINE/RTEBov |            |            |            |            |            |            |            |     |
| Sly-rnd5_family2019-LINE/RTEBo |            |            |            |            |            |            |            |     |
| Sly-rnd3_family322-LINE/RTEBov |            |            |            |            |            |            |            |     |
| Sly-rnd5_family1698-LINE/RTEBo |            |            |            |            |            |            |            |     |
| Sly-rnd1_family795-LINE/RTEBov |            |            |            |            |            |            |            |     |
| Stu-rnd-5_family-3162_LINE_RTE |            |            |            |            |            |            |            |     |
| Sly-rnd6_family1960-LINE/RTEBo |            |            |            |            |            |            |            |     |
| Stu-rnd-5_family-2493_LINE_RTE |            |            |            |            |            |            |            |     |
| Sly-rnd5_family447-LINE/RTEBov |            |            |            |            |            |            |            |     |
| Stu-rnd-6_family-2093_LINE_RTE |            |            |            |            |            |            |            |     |
| Consensus                      |            |            |            |            |            |            |            |     |
| Conservation                   |            |            |            |            |            |            |            |     |

|                                | 580        |            | 600        |            | 620        |            |            |     |
|--------------------------------|------------|------------|------------|------------|------------|------------|------------|-----|
| Stu-rnd-1_family-417_LINE_RTE  |            |            |            |            |            |            |            |     |
| Sly-rnd1_family377-LINE/RTEBov |            |            |            |            |            |            |            |     |
| Stu-rnd-1_family-489_LINE_RTE  |            |            |            |            |            |            |            |     |
| Stu-rnd-1_family-607_LINE_RTE  |            |            |            |            |            |            |            |     |
| Stu-rnd-1_family-645_LINE_RTE  |            |            |            |            |            |            |            |     |
| Sly-rnd4_family81-LINE/RTEBovB |            |            |            |            |            |            |            |     |
| Stu-rnd-6_family-408_LINE_RTE  |            |            |            |            |            |            |            |     |
| Stu-rnd-1_family-351_LINE_RTE  |            |            |            |            |            |            |            |     |
| Stu-rnd-1_family-382_LINE_RTE  |            |            |            |            |            |            |            |     |
| Sly-rnd6_family746-LINE/RTEBov |            |            |            |            |            |            |            |     |
| Stu-rnd-5_family-325_LINE_RTE  |            |            |            |            |            |            |            |     |
| Sly-rnd4_family509-LINE/RTEBov |            |            |            |            |            |            |            |     |
| Stu-rnd-1_family-513_LINE_RTE  |            |            |            |            |            |            |            |     |
| Sly-rnd5_family1442-LINE/RTEBo |            |            |            |            |            |            |            |     |
| BovB_GI-RTE-Gehyra_lazelli     | AGTTCCTCAG | CTCTTGGCAC | ACATCTCCAG | GATACCTTTA | ATAAAGAAAA | AATTTTTATC | ATTTAATTAT | 123 |
| BovB_Gv-RTE-Gehyra_variegata   | -----TTCAA | CTTCCGAAGC | AAAAGT--AG | GTGATGATTA | AGAATAAAAT | AACAGTTGTC | AT-----GG  | 57  |
| BovB_PMo-RTE-Python_molurus    |            |            |            |            |            |            |            |     |
| BovB_Oa-RTE-Ovis_aries         |            |            |            |            |            |            |            |     |
| BovB-RTE-Bos_taurus            | CCAAGGTAAG | AGAAACCCAA | GTAAGACGGT | AGGTGTTGCA | AGAGGGCATC | AGAGGGCAGA | CACACTGAAA | 630 |
| BovB_Me-RTE-Macropus_eugenii   |            |            |            |            |            |            |            |     |
| BovB_Ano-RTE-Amphibolurus_norr | ----TGAAAT | ACAGAAGTAG | AAAGCAAAGT | TTGTGTTAGT | AATTACTCAT | GGTAATATTT | AAGTGGGATT | 66  |
| BovB_Gd-RTE-Eremiascincus_doug |            |            |            |            |            |            |            |     |
| BovB_Er-RTE-Eremiascincus_rich | TCAGAATGCC | AACAACCCGT | TTCCTAAGGG | TGGTTTTGGG | TCTGAGTAAG | GTAACGTTTC | AAACCCCTTA | 186 |
| BovB_Ca-RTE-Ctenotus_atlas     | CTTGTCTTGT | CTTGTAAGA  | CACCTTAAAG | CACCAAGAAG | TGAAAGGCCG | GATACAAATA | AACATAAACA | 178 |
| BovB_Es-RTE-Egernia_stokesii   |            |            |            |            |            |            |            |     |
| BovB_Tr-RTE-Tiliqua_rugosa     |            |            |            |            |            |            |            |     |
| BovB_ALI-RTE-Amblyomma_limbatu | GGTGATAAAG | GGCGAACGCT | GTCCACGCCG | GAGACCATCC | TCTCACAGCG | AGAACATTAT | TGGGTCAGTA | 120 |
| BovB_Hs-RTE-Hydrophis_spiralis |            |            |            |            |            |            |            |     |
| BovB_VA-RTE-Vipera_ammodytes   |            |            |            |            |            |            |            |     |
| BovB_ACo-RTE-Agkistrodon_conto |            |            |            |            |            |            |            |     |
| BovB_Pg-RTE-Perameles_gunnii   |            |            |            |            |            |            |            |     |
| BovB_lo-RTE-Isodon_obesulus    |            |            |            |            |            |            |            |     |
| BovB_Bp-RTE-Burramys_parvulus  |            |            |            |            |            |            |            |     |
| BovB_Pb-RTE-Petaurus_breviceps |            |            |            |            |            |            |            |     |
| BovB_Ma-RTE-Macropus_antilopin |            |            |            |            |            |            |            |     |
| BovB_Af-RTE-Antechinus_flavipe |            |            |            |            |            |            |            |     |
| BovB_Ac-RTE-Anolis_carolinensi |            |            |            |            |            |            |            |     |
| BovB_BM-RTE-Bombyx_mori        |            |            |            |            |            |            |            |     |
| BovB_Dr-RTE-Christinus         |            |            |            |            |            |            |            |     |
| BovB_La-RTE-Loxodonta_africana |            |            |            |            |            |            |            |     |
| BovB_Pc-RTE-Procavia_capensis  |            |            |            |            |            |            |            |     |
| BovB_Et-RTE-Christinus         |            |            |            |            |            |            |            |     |
| BovB_Ta-RTE-Tachyglossus_acule | GGGTCAGGAG | AGTGAGCATA | CGCCAATGAA | ACTTAGAGCA | ATGCCACTGA | GAGATACTCT | CTCACAAAGG | 113 |
| BovB_Plat-RTE-Ornithorhynchus  | TGG-CAGGAG | AGTTTGCCTA | CGCCAATGAA | GCTTAGAGCT | ATGCCATTGA | GAGATACTCT | --CGCTAGG  | 96  |
| BovB_Ec-RTE-Equus_caballus     |            |            |            |            |            |            |            |     |
| BovB_Cg-RTE-Christinus         |            |            |            |            |            |            |            |     |
| BovB_Bh-RTE-Bothriocroton_hydr |            |            |            |            |            |            |            |     |
| BovB_MI-RTE-Gehyra_variegata   |            |            |            |            |            |            |            |     |
| Sly-rnd1_family284-LINE/RTEBov |            |            |            |            |            |            |            |     |
| Sly-rnd5_family2019-LINE/RTEBo |            |            |            |            |            |            |            |     |
| Sly-rnd3_family322-LINE/RTEBov |            |            |            |            |            |            |            |     |
| Sly-rnd5_family1698-LINE/RTEBo |            |            |            |            |            |            |            |     |
| Sly-rnd1_family795-LINE/RTEBov |            |            |            |            |            |            |            |     |
| Stu-rnd-5_family-3162_LINE_RTE |            |            |            |            |            |            |            |     |
| Sly-rnd6_family1960-LINE/RTEBo |            |            |            |            |            |            |            |     |
| Stu-rnd-5_family-2493_LINE_RTE |            |            |            |            |            |            |            |     |
| Sly-rnd5_family447-LINE/RTEBov |            |            |            |            |            |            |            |     |
| Stu-rnd-6_family-2093_LINE_RTE |            |            |            |            |            |            |            |     |
| Consensus                      |            |            |            |            |            |            |            |     |
| Conservation                   |            |            |            |            |            |            |            |     |

|                                | 640           | 660           | 680          | 700         |                                                |
|--------------------------------|---------------|---------------|--------------|-------------|------------------------------------------------|
| Stu-rnd-1_family-417_LINE_RTE  | -----         | -----         | -----        | -----       | -                                              |
| Sly-rnd1_family377-LINE/RTEBov | -----         | -----         | -----        | -----       | -                                              |
| Stu-rnd-1_family-489_LINE_RTE  | -----         | -----         | -----        | -----       | -                                              |
| Stu-rnd-1_family-607_LINE_RTE  | -----         | -----         | -----        | -----       | -                                              |
| Stu-rnd-1_family-645_LINE_RTE  | -----         | -----         | -----        | -----       | -                                              |
| Sly-rnd4_family81-LINE/RTEBovB | -----         | -----         | -----        | -----       | -                                              |
| Stu-rnd-6_family-408_LINE_RTE  | -----         | -----         | -----        | -----       | -                                              |
| Stu-rnd-1_family-351_LINE_RTE  | -----         | -----         | -----        | -----       | -                                              |
| Stu-rnd-1_family-382_LINE_RTE  | -----         | -----         | -----        | -----       | -                                              |
| Sly-rnd6_family746-LINE/RTEBov | -----         | -----         | -----        | -----       | -                                              |
| Stu-rnd-5_family-325_LINE_RTE  | -----         | -----         | -----        | -----       | -                                              |
| Sly-rnd4_family509-LINE/RTEBov | -----         | -----         | -----        | -----       | -                                              |
| Stu-rnd-1_family-513_LINE_RTE  | -----         | -----         | -----        | -----       | -                                              |
| Sly-rnd5_family1442-LINE/RTEBo | -----         | -----         | -----        | -----       | -                                              |
| BovB_GI-RTE-Gehyra_lazelli     | ATTTTAAATC    | CCTCTCATGG    | ATCA --- TTG | CCTTGACGCG  | GCGAGGGGG- CTTGCGTGGT TCGATGAGGC 189           |
| BovB_Gv-RTE-Gehyra_variegata   | ATCATTG - - C | CCTCTCATGG    | ATCA --- TTG | CCTTGATGTG  | GCGAGGGGG- CTTGCGTGGT TCGATGAGGC 121           |
| BovB_PMo-RTE-Python_molurus    | ACCCCCA - - C | CCCTTCATGG    | ATCA --- CTG | CCTTGTCTGTG | GCGAAGGGG- CTTGCGTAAAC TCAGTGAAGC 64           |
| BovB_Oa-RTE-Ovis_aries         | ACCACAATCA    | CCCTTCATGG    | ATCA --- CAG | CCTTGTCTATG | GCAAACGGG- CTTGTATAAC TCAATGAAAC 87            |
| BovB-RTE-Bos_taurus            | -CCATACTCA    | CAGAAAATA     | GTCAATCTAA   | TCACACTAGG  | ACCA - CAGC- CTTGTCTAAC TCAATGAAAC 697         |
| BovB_Me-RTE-Macropus_eugenii   | -----         | -----         | -----        | -----       | -                                              |
| BovB_Ano-RTE-Amphibolurus_norr | ATTTTACACC    | CCCTTCATGG    | ATTG --- CTG | CCTTGTCTGTG | GCGAAGGGG- CTTGAGTAAAC TCAGAGAAGC 132          |
| BovB_Gd-RTE-Eremiascincus_doug | -----         | -----         | -----        | -----       | -                                              |
| BovB_Er-RTE-Eremiascincus_rich | GTGTCCTCCTC   | CCTTTCATAC    | AACA --- AAC | CTCTCGTAGC  | GAAAAGGGG- CTTGAGTAAAC TCAATGAAGC 252          |
| BovB_Ca-RTE-Ctenotus_atlas     | AGTGTCCC - C  | CCTTACAGAG    | ATCA --- CTG | CCTTGTGTGTG | GCAAAGGGG- CTTGAGTAGC TCAGTGAAGC 243           |
| BovB_Es-RTE-Egernia_stokesii   | CAAGATTGGC    | CCCTTCATGG    | ATCA --- CTG | CCTTGTCTGTG | GCAAAGGGG- CTTGAGTAAAC TCAATGAGGC 68           |
| BovB_Tr-RTE-Tiliqua_rugosa     | CATACCCCCC    | CCCTTCATGG    | ATCA --- CTG | CCTTGTGTGTG | GCGAAGGGG- CTTGAGTAAAC TCAGTGAAGC 91           |
| BovB_ALi-RTE-Amblyomma_limbato | TATTCCGTCC    | CTCTACATAG    | ACTA --- CTG | CCTTGTCTGTG | GCGAAGGGGG CTTGCGTAGC TCACGGAAGC 187           |
| BovB_Hs-RTE-Hydrophis_spiralis | -----         | -----         | -----        | -----       | -                                              |
| BovB_VA-RTE-Vipera_ammodytes   | -----         | -CTTCCATGG    | ATTA --- CTG | CCTTGTCTGTG | GCGAAGGGG- CTTGCATAAT TCAATGAAGC 55            |
| BovB_ACo-RTE-Agkistrodon_conto | -----         | -A CCCTTCATGG | ATTA --- CTG | CCTTGTCTGTG | GCGAAGGGG- CTTGCGTAAAC TCAATGAAGC 57           |
| BovB_Pg-RTE-Perameles_gunnii   | -----         | -----         | -----        | -----       | -                                              |
| BovB_lo-RTE-Isodon_obesulus    | -----         | -----         | -----        | -----       | -                                              |
| BovB_Bp-RTE-Burramys_parvulus  | -----         | -----         | -----        | -----       | -                                              |
| BovB_Pb-RTE-Petaurus_breviceps | -----         | -----         | -----        | -----       | -                                              |
| BovB_Ma-RTE-Macropus_antilopin | -----         | -T CTGTAATAT  | AGGCATATGC   | TACCATATGA  | TGTCCTCCTT CCTATGTATA TGTATGCATA 61            |
| BovB_Af-RTE-Antechinus_flavipe | -----         | -----         | -----        | -----       | -                                              |
| BovB_Ac-RTE-Anolis_carolinensi | -----         | -----         | -----        | -----       | -                                              |
| BovB_BM-RTE-Bombyx_mori        | -----         | -----         | -----        | -----       | -                                              |
| BovB_Dr-RTE-Christinus         | -----         | -----         | -----        | -----       | -                                              |
| BovB_La-RTE-Loxodonta_africana | -----         | -----         | -----        | -TTGTC      | GTACTGTGGG GGCTTGCGTG TTGCTGTGAT ACTGGAAGCT 45 |
| BovB_Pc-RTE-Procavia_capensis  | -----         | -----         | -----        | -CTTGTGTC   | TGTCAGTGGA GGCTTGCTTG TTGCTGTGAT GCAGGAAGCT 46 |
| BovB_Et-RTE-Christinus         | -----         | -----         | -----        | -----       | -                                              |
| BovB-Ta-RTE-Tachyglossus_acule | TTACCCATAA    | CGGAAAAGTC    | TAAGCCAAAG   | AATCAGACAA  | AGTTGATTCA CCTGTGCTGG GCAGCA - GCG 182         |
| BovB_Plat-RTE-Ornithorhynchus  | TTACCCATAA    | TGAAAAGGTC    | TAAGCGGAAG   | CGTCAGACAA  | AGTTGATTTCG CCTGTGCTGG GCAGCA - GCG 165        |
| BovB_Ec-RTE-Equus_caballus     | -----         | -----         | -----        | -----       | -                                              |
| BovB_Cg-RTE-Christinus         | -----         | -----         | -----        | -----       | -                                              |
| BovB_Bh-RTE-Bothriocroton_hydr | -----         | -----         | -----        | -----       | -                                              |
| BovB_MI-RTE-Gehyra_variegata   | -----         | -----         | -----        | -----       | -                                              |
| Sly-rnd1_family284-LINE/RTEBov | -----         | -----         | -----        | -----       | -                                              |
| Sly-rnd5_family2019-LINE/RTEBo | -----         | -----         | -----        | -----       | -                                              |
| Sly-rnd3_family322-LINE/RTEBov | -----         | -----         | -----        | -----       | -                                              |
| Sly-rnd5_family1698-LINE/RTEBo | -----         | -----         | -----        | -----       | -                                              |
| Sly-rnd1_family795-LINE/RTEBov | -----         | -----         | -----        | -----       | -                                              |
| Stu-rnd-5_family-3162_LINE_RTE | -----         | -----         | -----        | -----       | -                                              |
| Sly-rnd6_family1960-LINE/RTEBo | -----         | -----         | -----        | -----       | -                                              |
| Stu-rnd-5_family-2493_LINE_RTE | -----         | -----         | -----        | -----       | -                                              |
| Sly-rnd5_family447-LINE/RTEBov | -----         | -----         | -----        | -----       | -                                              |
| Stu-rnd-6_family-2093_LINE_RTE | -----         | -----         | -----        | -----       | -                                              |
| Consensus                      | -----         | -----         | -----        | -----       | -                                              |

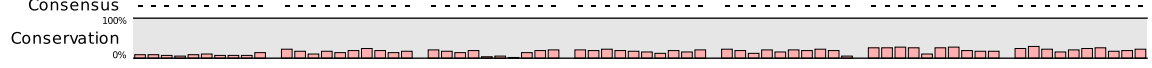

|                                 | 720           |                 | 740           |              | 760        |                                    |
|---------------------------------|---------------|-----------------|---------------|--------------|------------|------------------------------------|
| Stu-rnd-1_family-417_LINE_RTE   | -----         | -----           | -----         | -----        | -----      | -----                              |
| Sly-rnd1_family377-LINE/RTEBov  | -----         | -----           | -----         | -----        | -----      | -----                              |
| Stu-rnd-1_family-489_LINE_RTE   | -----         | -----           | -----         | -----        | -----      | -----                              |
| Stu-rnd-1_family-607_LINE_RTE   | -----         | -----           | -----         | -----        | -----      | -----                              |
| Stu-rnd-1_family-645_LINE_RTE   | -----         | -----           | -----         | -----        | -----      | -----                              |
| Sly-rnd4_family81-LINE/RTEBovB  | -----         | -----           | -----         | -----        | -----      | -----                              |
| Stu-rnd-6_family-408_LINE_RTE   | -----         | -----           | -----         | -----        | -----      | -----                              |
| Stu-rnd-1_family-351_LINE_RTE   | -----         | -----           | -----         | -----        | -----      | -----                              |
| Stu-rnd-1_family-382_LINE_RTE   | -----         | -----           | -----         | -----        | -----      | -----                              |
| Sly-rnd6_family746-LINE/RTEBov  | -----         | -----           | -----         | -----        | -----      | -----                              |
| Stu-rnd-5_family-325_LINE_RTE   | -----         | -----           | -----         | -----        | -----      | -----                              |
| Sly-rnd4_family509-LINE/RTEBov  | -----         | -----           | -----         | -----        | -----      | -----                              |
| Stu-rnd-1_family-513_LINE_RTE   | -----         | -----           | -----         | -----        | -----      | -----                              |
| Sly-rnd5_family1442-LINE/RTEBo  | -----         | -----           | -----         | -----        | -----      | -----                              |
| BovB_GI-RTE-Gehyra_lazelli      | TGTGGGCTAT    | GCCG - - TGGA   | GGGCCACCCA    | GGA - CGGACA | GGCCACAACA | GAG - - AACTC A - - - - - GACA 249 |
| BovB_Gv-RTE-Gehyra_variegata    | TGTGGGCTAT    | GCCG - - TGGA   | GGGCCACCCA    | GGA - CGGACA | GGCCACAACA | GAG - - AACTC A - - - - - GACA 181 |
| BovB_PMo-RTE-Python_molurus     | CATGAGCTAT    | ACCG - - TGCA   | GGGCCACCCA    | AGA - CGGACA | GGTCATGACA | GAG - - AGTTC T - - - - - GACA 124 |
| BovB_Oa-RTE-Ovis_aries          | TATGAGCCAT    | GCCA - - TGCA   | GGGCCACCCA    | AGA - TGGACG | GGTCATAGTG | GAG - - AGTTC T - - - - - GACA 147 |
| BovB-RTE-Bos_taurus             | TA - - AGCCAT | GCC - - CGTG    | GGGCAACCCA    | AGA - TGGGCG | GGTCATGGTG | GAG - - AGATC T - - - - - GACA 754 |
| BovB_Me-RTE-Macropus_eugenii    | -----         | -----           | -----         | -----        | -----      | -----                              |
| BovB_Ano-RTE-Amphibolurus_norr  | TATGGGCTAT    | GCCG - - TGCA   | GGGACACCCA    | AGA - CGGACA | GGACATAGTG | GAG - - AGTTC C - - - - - GACT 192 |
| BovB_Gd-RTE-Eremiascincus_doug  | -----         | -----           | -----         | -----        | -----      | -----                              |
| BovB_Er-RTE-Eremiascincus_rich  | AGTGAACCTAT   | GCCATGTAGG      | G - - TTACCCA | AGA - TGGACA | GGTCATAGTA | GAG - - AGTTC T - - - - - GACT 312 |
| BovB_Ca-RTE-Ctenotus_atlas      | TGTGAACCTAT   | GCCATGTAGA      | GATTTCCCCA    | AGA - TGGACA | GGTCAAAGTA | GAA - - AGTTC T - - - - - GACT 305 |
| BovB_Es-RTE-Egernia_stokesii    | TATGAGCTAT    | GCT - - GTGTA   | GGGACACCCA    | AGA - TAGACA | GGTCATAGCA | GAGAAAGCTC TAAAGGGACT 135          |
| BovB_Tr-RTE-Tiliqua_rugosa      | TATGAGCTAT    | GCCA - GGGTG    | GGGACACCCA    | AGA - TGGACA | GGTCATAGCA | GAG - - AGTTC T - - - - - GACT 152 |
| BovB_ALi-RTE-Amblyomma_limbato  | TATGAGCTAT    | GCCG - - TGCA   | GGGTCACCCA    | AGA - CGGACA | GGTCATAGCA | GAG - - AGTTC T - - - - - TACA 247 |
| BovB_Hs-RTE-Hydrophis_spiralis  | -----         | -----           | -----         | -----        | -----      | -----                              |
| BovB_VA-RTE-Vipera_ammodytes    | TATGAGCTAT    | GCCG - - TGCA   | GGGCCACCCA    | AGA - CGGAAA | GGTCATAGCA | GAG - - AGTTC T - - - - - GACA 115 |
| BovB_ACo-RTE-Agkistrodon_conto  | TATGAGCTAT    | GCCG - - TGCA   | GGGCCACCCA    | AGATCGGACA   | GGTCATAGCA | GAG - - AGTTC T - - - - - GACA 118 |
| BovB_Pg-RTE-Perameles_gunnii    | -----         | -----           | -----         | -----        | -----      | -----                              |
| BovB_lo-RTE-Isodon_obesulus     | -----         | -----           | -----         | -----        | -----      | -----                              |
| BovB_Bp-RTE-Burramys_parvulus   | -----         | -----           | -----         | -----        | -----      | -----                              |
| BovB_Pb-RTE-Petaurus_breviceps  | -----         | -----           | -----         | -----        | -----      | -----                              |
| BovB_Ma-RTE-Macropus_antilopini | TATGTGTGCA    | TTACAAGTG       | TGTATATATA    | TATCTATCCA   | TCTATATCTA | TTTATCTCTC CTTCTAGATC 131          |
| BovB_Af-RTE-Antechinus_flavipes | -----         | -----           | -----         | -----        | -----      | -----                              |
| BovB_Ac-RTE-Anolis_carolinensis | CATGAGCTAC    | CG - - - - TGCA | GGGCCACCCA    | AGA - CGGGAA | GGTCATGGCA | GAG - - AGGTC A - - - - - GACT 77  |
| BovB_BM-RTE-Bombyx_mori         | -----         | -----           | -----         | -----        | -----      | -----                              |
| BovB_Dr-RTE-Christinus          | -----         | -----           | -----         | -----        | -----      | -----                              |
| BovB_La-RTE-Loxodonta_africana  | ATGCCACTGG    | TATTCAAATA      | CCAGCAGGGT    | CACCCATGGA   | AGACAGGTTT | CAGCTGAGCT TCCAGACTAA 115          |
| BovB_Pc-RTE-Procavia_capensis   | ATGCCACTGG    | TATTTAGGTA      | CCAGCAGGGT    | CAACCATGGT   | AGACAAGTTT | CAGCTGAGCT TCCAGACTAA 116          |
| BovB_Et-RTE-Christinus          | -----         | -----           | -----         | -----        | -----      | -----                              |
| BovB-Ta-RTE-Tachyglossus_acule  | GCA TGGGAGA   | GAGTCAAAGG      | CAGATGAACA    | AATGATCAAA   | ATGTGGATCA | AA - ACAACGG CAGAGACTCA 251        |
| BovB_Plat-RTE-Ornithorhynchus   | GCATGGGAAA    | GAGTCAAAGG      | CGGNTGATCA    | AATGATCAAA   | ATGTTGATCA | AAGACAACGG CAGAGACTCA 235          |
| BovB_Ec-RTE-Equus_caballus      | -----         | -----           | -----         | -----        | -----      | -----                              |
| BovB_Cg-RTE-Christinus          | -----         | -----           | -----         | -----        | -----      | -----                              |
| BovB_Bh-RTE-Bothriocroton_hydr  | -----         | -----           | -----         | -----        | -----      | -----                              |
| BovB_MI-RTE-Gehyra_variegata    | -----         | -----           | -----         | -----        | -----      | -----                              |
| Sly-rnd1_family284-LINE/RTEBov  | -----         | -----           | -----         | -----        | -----      | -----                              |
| Sly-rnd5_family2019-LINE/RTEBo  | -----         | -----           | -----         | -----        | -----      | -----                              |
| Sly-rnd3_family322-LINE/RTEBov  | -----         | -----           | -----         | -----        | -----      | -----                              |
| Sly-rnd5_family1698-LINE/RTEBo  | -----         | -----           | -----         | -----        | -----      | -----                              |
| Sly-rnd1_family795-LINE/RTEBov  | -----         | -----           | -----         | -----        | -----      | -----                              |
| Stu-rnd-5_family-3162_LINE_RTE  | -----         | -----           | -----         | -----        | -----      | -----                              |
| Sly-rnd6_family1960-LINE/RTEBo  | -----         | -----           | -----         | -----        | -----      | -----                              |
| Stu-rnd-5_family-2493_LINE_RTE  | -----         | -----           | -----         | -----        | -----      | -----                              |
| Sly-rnd5_family447-LINE/RTEBov  | -----         | -----           | -----         | -----        | -----      | -----                              |
| Stu-rnd-6_family-2093_LINE_RTE  | -----         | -----           | -----         | -----        | -----      | -----                              |
| Consensus                       | -----         | -----           | -----         | -----        | -----      | -----                              |

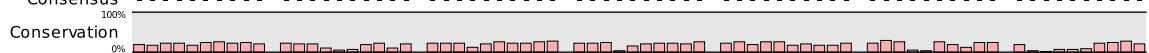

|                                | 780           | 800          | 820          | 840          |            |              |             |               |    |
|--------------------------------|---------------|--------------|--------------|--------------|------------|--------------|-------------|---------------|----|
| Stu-rnd-1_family-417_LINE_RTE  | -----         | -----        | -----        | -----        | -----      |              |             |               |    |
| Sly-rnd1_family377-LINE/RTEBov | -----         | -----        | -----        | -----        | -----      |              |             |               |    |
| Stu-rnd-1_family-489_LINE_RTE  | -----         | -----        | -----        | -----        | -----      |              |             |               |    |
| Stu-rnd-1_family-607_LINE_RTE  | -----         | -----        | -----        | -----        | -----      |              |             |               |    |
| Stu-rnd-1_family-645_LINE_RTE  | -----         | -----        | -----        | -----        | -----      |              |             |               |    |
| Sly-rnd4_family81-LINE/RTEBovB | -----         | -----        | -----        | -----        | -----      |              |             |               |    |
| Stu-rnd-6_family-408_LINE_RTE  | -----         | -----        | -----        | -----        | -----      |              |             |               |    |
| Stu-rnd-1_family-351_LINE_RTE  | -----         | -----        | -----        | -----        | -----      |              |             |               |    |
| Stu-rnd-1_family-382_LINE_RTE  | -----         | -----        | -----        | -----        | -----      |              |             |               |    |
| Sly-rnd6_family746-LINE/RTEBov | -----         | -----        | -----        | -----        | -----      |              |             |               |    |
| Stu-rnd-5_family-325_LINE_RTE  | -----         | -----        | -----        | -----        | -----      |              |             |               |    |
| Sly-rnd4_family509-LINE/RTEBov | -----         | -----        | -----        | -----        | -----      |              |             |               |    |
| Stu-rnd-1_family-513_LINE_RTE  | -----         | -----        | -----        | -----        | -----      |              |             |               |    |
| Sly-rnd5_family1442-LINE/RTEBo | -----         | -----        | -----        | -----        | -----      |              |             |               |    |
| BovB_GI-RTE-Gehyra_lazelli     | AAATGTGATC    | CAC - TGGAGG | AGGAAATGGC   | AA - CCCACTC | CAGTATCTTT | GCCAAGAAAA   | CCCTATGGAC  | 317           |    |
| BovB_Gv-RTE-Gehyra_variegata   | AAATGTGATC    | CAC - TGGAGG | AGGAAACGGC   | AA - CCCACTC | CAGTATCTTT | GCCAAGAAAA   | CCCTATGGAC  | 249           |    |
| BovB_PMo-RTE-Python_molurus    | AAATGTGGTC    | CAC - TGGAGA | AGGAAATGGC   | AA - CCCACTC | CAGTATCCTT | GCCAAGAAAA   | CCCCATGGAC  | 192           |    |
| BovB_Oa-RTE-Ovis_aries         | AAATGTGGTC    | CAC - TGGAGA | AGGGAATGGC   | AA - ACCACTC | CAGTATCTT  | GCCTTGAGAA   | CCCCATGAAC  | 215           |    |
| BovB-RTE-Bos_taurus            | GAATGTGGTC    | CAC - TGGAGA | AGGGAATGGC   | AA - ACCACTT | CAGTATCTT  | GCCTTGAGAA   | CCCCATGAAC  | 822           |    |
| BovB_Me-RTE-Macropus_eugenii   | -----         | -----        | -----        | ---          | TATCTTT    | GCCA - GGAAA | GCCCCATGGAC | 26            |    |
| BovB_Ano-RTE-Amphibolurus_norr | AAACGCAATC    | CACCTGGAGT   | AGGAACTGGC   | AATGCCACTC   | CAGTATCTTT | GCCAAGAAAA   | CCCCATGATC  | 262           |    |
| BovB_Gd-RTE-Eremiascincus_doug | -----         | -----        | -----        | -----        | -----      | -----        | -----       | -             |    |
| BovB_Er-RTE-Eremiascincus_rich | AAACGTGATC    | CGC - TGGAGA | AGGAAATAGG   | CAACCCACTC   | CAGTACTCTT | GCCAAGAAAA   | CCCCATGAAC  | 381           |    |
| BovB_Ca-RTE-Ctenotus_atlas     | AAACGTGATC    | CGC - TGGAGA | AGGAAATGGG   | CAACCCACTC   | CAGTACTCTT | GCCAAGAAAA   | CCCCATGGAT  | 374           |    |
| BovB_Es-RTE-Egernia_stokesii   | AAACGTGATC    | CAC - TGAAGA | AGGAAAT - GA | CAACCCACTC   | CAGCATCCTT | ACCAAGAAAA   | CCCTATGAAC  | 203           |    |
| BovB_Tr-RTE-Tiliqua_rugosa     | AAACGTGATC    | CAC - TGGAGA | AGGAAAT - GG | CAACCCACTC   | CAGTATCCTT | GCCAAGAAAA   | CCCTATGGAC  | 220           |    |
| BovB_ALi-RTE-Amblyomma_limbatu | AAACATGATT    | CAA - TAGAGA | AGGAAATGGC   | AA - CCCACTC | CAATATCTCT | GCCATGAAAA   | CTCCATCGAT  | 315           |    |
| BovB_Hs-RTE-Hydrophis_spiralis | -----         | -----        | -----        | -----        | -----      | -----        | -----       | -             |    |
| BovB_VA-RTE-Vipera_ammodytes   | AAACGTGATC    | CAC - TGGAGA | AGGAAATGGC   | AA - CCCACTC | CAGTATCTTT | GCCATGAAAA   | CCCTATGGAC  | 183           |    |
| BovB_ACo-RTE-Agkistrodon_conto | AAATGTGATC    | CAC - TGGAGA | AGGAAATGGC   | AA - CCCACTC | CAGTATCTTT | GCCATGAAAA   | CCCCATGGAC  | 186           |    |
| BovB_Pg-RTE-Perameles_gunnii   | -----         | -----        | -----        | -----        | -----      | -----        | -----       | -             |    |
| BovB_lo-RTE-Isodon_obesulus    | -----         | -----        | -----        | -----        | -----      | -----        | -----       | -             |    |
| BovB_Bp-RTE-Burramys_parvulus  | -----         | -----        | -----        | -----        | -----      | -----        | -----       | -             |    |
| BovB_Pb-RTE-Petaurus_breviceps | -----         | -----        | -----        | -----        | -----      | -----        | -----       | -             |    |
| BovB_Ma-RTE-Macropus_antilopin | ACTGCCTCTC    | CTTCTGAATC   | ACTGCCTTGT   | TGAGGTGGAG   | GGGCTTGCA  | AGCTCAATGA   | AGCTATGAGC  | 201           |    |
| BovB_Af-RTE-Antechinus_flavipe | -----         | -----        | -----        | -----        | -----      | -----        | -----       | -             |    |
| BovB_Ac-RTE-Anolis_carolinensi | AAATACGATC    | CCT - GGGGA  | AGGTAATGGC   | AA - CCCACCC | CAGTATCTT  | GCCATGAAAA   | CTACATGGAT  | 144           |    |
| BovB_BM-RTE-Bombyx_mori        | -----         | -----        | -----        | -----        | -----      | ---          | CCAAGAA     | 7             |    |
| BovB_Dr-RTE-Christinus         | -----         | ---          | TGAGGA       | AAGCAATGGC   | AAACTACTC  | ACAATTTTGG   | ACAA - AAAA | CTTTATGGAT    | 54 |
| BovB_La-RTE-Loxodonta_africana | GACAG - - ACT | AGGAAGAAGG   | ACCCGGAAGT   | CTACTTCTGA   | AAAGAATTAG | CCAGTGAAAA   | CCTTATGAAT  | 183           |    |
| BovB_Pc-RTE-Procavia_capensis  | GACAG - - ACT | AGGAAGAAGG   | ACCTGGCAGT   | CTACTTCTGA   | AAAGAATTAG | CCAGGGAAAA   | CCTTATGAAT  | 184           |    |
| BovB_Et-RTE-Christinus         | -----         | -----        | -----        | -----        | ---        | AAGTCCTA -   | TGAATGAAAA  | CAACATG - - - | 25 |
| BovB-Ta-RTE-Tachyglossus_acule | GGTTTTCACT    | GCGCGGAAGG   | AGGCAATGGT   | AAACCCTTC    | TTTACTTTTA | CCAA - GAAAA | CTCTATGGAT  | 320           |    |
| BovB_Plat-RTE-Ornithorhynchus  | AGTTTTCACT    | GCGCGGAAGG   | AGGCAACGGT   | AAACCCTTC    | CGTATTTTAA | CCAA - GAAAA | CTCTATGGAT  | 304           |    |
| BovB_Ec-RTE-Equus_caballus     | GCAGAAGGCA    | ATGGTAAACC   | ACTGCTGTAT   | TTTCTTTTT    | TTTTTTTTT  | ACCTTGAAAA   | CCCTATGATG  | 77            |    |
| BovB_Cg-RTE-Christinus         | -----         | -----        | -----        | -----        | -----      | -----        | -----       | -             |    |
| BovB_Bh-RTE-Bothriocroton_hydr | -----         | -----        | -----        | -----        | -----      | -----        | -----       | -             |    |
| BovB_MI-RTE-Gehyra_variegata   | -----         | -----        | -----        | -----        | -----      | -----        | -----       | -             |    |
| Sly-rnd1_family284-LINE/RTEBov | -----         | -----        | -----        | -----        | -----      | -----        | -----       | -             |    |
| Sly-rnd5_family2019-LINE/RTEBo | -----         | -----        | -----        | -----        | -----      | -----        | -----       | -             |    |
| Sly-rnd3_family322-LINE/RTEBov | -----         | -----        | -----        | -----        | -----      | -----        | -----       | -             |    |
| Sly-rnd5_family1698-LINE/RTEBo | -----         | -----        | -----        | -----        | -----      | -----        | -----       | -             |    |
| Sly-rnd1_family795-LINE/RTEBov | -----         | -----        | -----        | -----        | -----      | -----        | -----       | -             |    |
| Stu-rnd-5_family-3162_LINE_RTE | -----         | -----        | -----        | -----        | -----      | -----        | -----       | -             |    |
| Sly-rnd6_family1960-LINE/RTEBo | -----         | -----        | -----        | -----        | -----      | -----        | -----       | -             |    |
| Stu-rnd-5_family-2493_LINE_RTE | -----         | -----        | -----        | -----        | -----      | -----        | -----       | -             |    |
| Sly-rnd5_family447-LINE/RTEBov | -----         | -----        | -----        | -----        | -----      | -----        | -----       | -             |    |
| Stu-rnd-6_family-2093_LINE_RTE | -----         | -----        | -----        | -----        | -----      | -----        | -----       | -             |    |
| Consensus                      | -----         | -----        | -----        | -----        | -----      | -----        | -----       | -             |    |
| Conservation                   |               |              |              |              |            |              |             |               |    |



|                                | 860        |             | 880        |            | 900        |            |            |            |     |
|--------------------------------|------------|-------------|------------|------------|------------|------------|------------|------------|-----|
| Stu-rnd-1_family-417_LINE_RTE  | ---        | ---         | ---        | ---        | ---        | ---        |            |            |     |
| Sly-rnd1_family377-LINE/RTEBov | ---        | ---         | ---        | ---        | ---        | ---        |            |            |     |
| Stu-rnd-1_family-489_LINE_RTE  | ---        | ---         | ---        | ---        | ---        | ---        |            |            |     |
| Stu-rnd-1_family-607_LINE_RTE  | ---        | ---         | ---        | ---        | ---        | ---        |            |            |     |
| Stu-rnd-1_family-645_LINE_RTE  | ---        | ---         | ---        | ---        | ---        | ---        |            |            |     |
| Sly-rnd4_family81-LINE/RTEBovB | ---        | ---         | ---        | ---        | ---        | ---        |            |            |     |
| Stu-rnd-6_family-408_LINE_RTE  | ---        | ---         | ---        | ---        | ---        | ---        |            |            |     |
| Stu-rnd-1_family-351_LINE_RTE  | ---        | ---         | ---        | ---        | ---        | ---        |            |            |     |
| Stu-rnd-1_family-382_LINE_RTE  | ---        | ---         | ---        | ---        | ---        | ---        |            |            |     |
| Sly-rnd6_family746-LINE/RTEBov | ---        | ---         | ---        | ---        | ---        | ---        |            |            |     |
| Stu-rnd-5_family-325_LINE_RTE  | ---        | ---         | ---        | ---        | ---        | ---        |            |            |     |
| Sly-rnd4_family509-LINE/RTEBov | ---        | ---         | ---        | ---        | ---        | ---        |            |            |     |
| Stu-rnd-1_family-513_LINE_RTE  | ---        | ---         | ---        | ---        | ---        | ---        |            |            |     |
| Sly-rnd5_family1442-LINE/RTEBo | ---        | ---         | ---        | ---        | ---        | ---        |            |            |     |
| BovB_GI-RTE-Gehyra_lazelli     | ---        | AGAAACA     | AAAGGCTAAA | AGATATGACG | CTGGAAGATG | AGCCCCTCAG | GTCGGAAGGT | GTCAG--ATA | 382 |
| BovB_Gv-RTE-Gehyra_variegata   | ---        | AGAAACA     | AAAGGCTAAA | AGATATGACG | CCGGAAGATG | AGCCCCTCAG | GTCGGAAGGT | GTCAG--ATA | 314 |
| BovB_PMo-RTE-Python_molurus    | ---        | AATGTTA     | AAAGGCTAAA | AGATATGACG | CCGGAAGATG | AGCCCCTCAG | GTCGGAAGGT | GTCCA--ATA | 257 |
| BovB_Oa-RTE-Ovis_aries         | ---        | AGTATGA     | AAAGGCAAAA | AGATATGACA | CTGAAAGATG | AGCCCCCAG  | GTCAGAAGGT | GTCCA--ATA | 280 |
| BovB-RTE-Bos_taurus            | ---        | AGTATGA     | AAAGGCAAAA | TGATAGGATA | CTGAAAGAGG | AACTCCCCAG | GTCAGTAGGT | GCCCA--ATA | 887 |
| BovB_Me-RTE-Macropus_eugenii   | ---        | AGTATGA     | AAAGGCAAAA | ATATGTGATG | CTAGAAGCTG | AGCCCCTCAG | GTTGG-AAAT | GTCCA--ACA | 90  |
| BovB_Ano-RTE-Amphibolurus_norr | ---        | AGAAACA     | AAAGGCTAAA | AGATATGACG | CTGGAAGATG | AGCCCCTCAG | GTCGGAAGGT | GTCCA--ACA | 327 |
| BovB_Gd-RTE-Eremiascincus_doug | ---        | ---         | ---        | ---        | ---        | ---        | ---        | ---        | --- |
| BovB_Er-RTE-Eremiascincus_rich | TACAGTACTA | AAAGGCTAAA  | CGATATGACA | CTGGAAGATG | AGCCCCTCAG | GTCGGAAGGT | GTCCA--TTA | 449        |     |
| BovB_Ca-RTE-Ctenotus_atlas     | TGCAAAACTA | AAAGGCTAAA  | CGATATGACA | CTGGAAGATG | AGACCCCCAG | GTCGGAAGGT | GTCCA--TTA | 442        |     |
| BovB_Es-RTE-Egernia_stokesii   | TTAAGTATCA | AAAGGCTAAA  | AGATATGATG | CAAGAAGATG | AGCCCCTCAG | GTCAGAAGGT | ATCCA--ATA | 271        |     |
| BovB_Tr-RTE-Tiliqua_rugosa     | TTTTGTATCA | AAAGGCTAAA  | AGATACGATG | CTGGAAGATG | AGCCCCTCAG | GTCAGAAGGT | ATCCA--ATA | 288        |     |
| BovB_ALI-RTE-Amblyomma_limbata | ---        | ACAACCA     | AAAAGCAAAA | AGATATGACA | TAAAAAGATC | AGCCATTGAG | GTCGGAAGGT | GTCCA--ATA | 380 |
| BovB_Hs-RTE-Hydrophis_spiralis | ---        | ---         | ---        | ---        | ---        | ---        | ---        | ---        | --- |
| BovB_VA-RTE-Vipera_ammodytes   | ---        | AGTACCA     | AAAGGCAATA | CGATATGACG | CTGGAAGATG | AGCCCCTCAG | GTCGGAAGGT | ATCCA--ATA | 248 |
| BovB_ACo-RTE-Agkistrodon_conto | ---        | AGTACCA     | AAAGGCAAAA | AGATATGACG | CTGGAAGATG | AGCCCCTCAG | GTCGGAAGGT | GTCCA--ATA | 251 |
| BovB_Pg-RTE-Perameles_gunnii   | ---        | ---         | ---        | ---        | ---        | ---        | ---        | ---        | --- |
| BovB_lo-RTE-Isodon_obesulus    | ---        | ---         | ---        | ---        | ---        | ---        | ---        | ---        | --- |
| BovB_Bp-RTE-Burramys_parvulus  | ---        | ---         | ---        | ---        | ---        | ---        | ---        | ---        | --- |
| BovB_Pb-RTE-Petaurus_breviceps | ---        | ---         | ---        | ---        | ---        | ---        | ---        | ---        | --- |
| BovB_Ma-RTE-Macropus_antilopin | TATAGTACCC | AAGATGGACA  | GGTCATAGTG | GAGAGTTCG  | ACACAAGGTG | ATCCACTTGA | GAAGG--AAA | 269        |     |
| BovB_Af-RTE-Antechinus_flavipe | ---        | ---         | ---        | ---        | ---        | ---        | ---        | ---        | --- |
| BovB_Ac-RTE-Anolis_carolinensi | CAGTACAACC | AGAGAAATGT  | CGGTATACCA | TCAGAAGATA | GGACCCCCAG | GTCGGAAGAT | GACCA--AAA | 212        |     |
| BovB_BM-RTE-Bombyx_mori        | A--ACCTCA  | TGATGTCGAC  | AGATATATTA | TTTGTATGTT | TCTCATGCGA | CCCAGTACG  | CACCGCGGCC | 74         |     |
| BovB_Dr-RTE-Christinus         | C--ACAAC   | CAATGCTTTC  | AAATATGGTG | CTGGAAGGTA | GGCCCCCTGG | GTCGGAAGGT | ATCT--CACG | 119        |     |
| BovB_La-RTE-Loxodonta_africana | A--GCAGCG  | GAACATTGTC  | TGATATAGTG | CTGGAAGATG | AGCCCCCCAG | GTTGGAAGGT | ACTCA--AAA | 248        |     |
| BovB_Pc-RTE-Procavia_capensis  | A--GCAGCT  | GAACATTGTC  | AGATATGGTG | CCGGAAGATG | AGCCCCCCAG | GTTGGAAGGT | ACTCA--GAA | 249        |     |
| BovB_Et-RTE-Christinus         | ---TTGTA   | TATCACTGTG  | AGATATATTG | TCAGAGGATG | GGACCCCTGG | GTCGGAAGGT | ACTCA--AAA | 88         |     |
| BovB-Ta-RTE-Tachyglossus_acule | ACACATACCA | GAATGACTAC  | AGATATAGTG | CTGGAAGATG | AGCCCCTCAG | GTTGGAAGGT | ACTCA--ACG | 388        |     |
| BovB_Plat-RTE-Ornithorhynchus  | ACACATACCA | GAACGACTAC  | AGATATAGTG | CTGGAAGATG | AGCCCCTCAG | GTCGGAAGGT | ACTCA--ACG | 372        |     |
| BovB_Ec-RTE-Equus_caballus     | AGACAGTCCA | AAATGAAAATA | TGAGATAGTG | CTGGAAGATG | AGACCCCCAG | GTCAGAAGGT | ACTCA--AAC | 145        |     |
| BovB_Cg-RTE-Christinus         | ---        | ---         | ---        | ---        | ---        | ---        | ---        | ---        | --- |
| BovB_Bh-RTE-Bothriocroton_hydr | ---        | ---         | ---        | ---        | ---        | ---        | ---        | ---        | --- |
| BovB_MI-RTE-Gehyra_variegata   | ---        | ---         | ---        | ---        | ---        | ---        | ---        | ---        | --- |
| Sly-rnd1_family284-LINE/RTEBov | ---        | ---         | ---        | ---        | ---        | ---        | ---        | ---        | --- |
| Sly-rnd5_family2019-LINE/RTEBo | ---        | ---         | ---        | ---        | ---        | ---        | ---        | ---        | --- |
| Sly-rnd3_family322-LINE/RTEBov | ---        | ---         | ---        | ---        | ---        | ---        | ---        | ---        | --- |
| Sly-rnd5_family1698-LINE/RTEBo | ---        | ---         | ---        | ---        | ---        | ---        | ---        | ---        | --- |
| Sly-rnd1_family795-LINE/RTEBov | ---        | ---         | ---        | ---        | ---        | ---        | ---        | ---        | --- |
| Stu-rnd-5_family-3162_LINE_RTE | ---        | ---         | ---        | ---        | ---        | ---        | ---        | ---        | --- |
| Sly-rnd6_family1960-LINE/RTEBo | ---        | ---         | ---        | ---        | ---        | ---        | ---        | ---        | --- |
| Stu-rnd-5_family-2493_LINE_RTE | ---        | ---         | ---        | ---        | ---        | ---        | ---        | ---        | --- |
| Sly-rnd5_family447-LINE/RTEBov | ---        | ---         | ---        | ---        | ---        | ---        | ---        | ---        | --- |
| Stu-rnd-6_family-2093_LINE_RTE | ---        | ---         | ---        | ---        | ---        | ---        | ---        | ---        | --- |
| Consensus                      | ---        | ---         | ---        | ---        | ---        | ---        | ---        | ---        | --- |

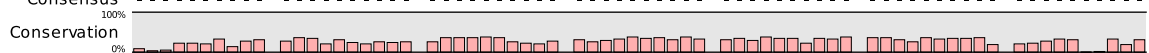

|                                | 920         | 940           | 960          | 980         |               |            |                |     |
|--------------------------------|-------------|---------------|--------------|-------------|---------------|------------|----------------|-----|
| Stu-rnd-1_family-417_LINE_RTE  | -----       | -----         | -----        | -----       |               |            |                |     |
| Sly-rnd1_family377-LINE/RTEBov | -----       | -----         | -----        | -----       |               |            |                |     |
| Stu-rnd-1_family-489_LINE_RTE  | -----       | -----         | -----        | -----       |               |            |                |     |
| Stu-rnd-1_family-607_LINE_RTE  | -----       | -----         | -----        | -----       |               |            |                |     |
| Stu-rnd-1_family-645_LINE_RTE  | -----       | -----         | -----        | -----       |               |            |                |     |
| Sly-rnd4_family81-LINE/RTEBovB | -----       | -----         | -----        | -----       |               |            |                |     |
| Stu-rnd-6_family-408_LINE_RTE  | -----       | -----         | -----        | -----       |               |            |                |     |
| Stu-rnd-1_family-351_LINE_RTE  | -----       | -----         | -----        | -----       |               |            |                |     |
| Stu-rnd-1_family-382_LINE_RTE  | -----       | -----         | -----        | -----       |               |            |                |     |
| Sly-rnd6_family746-LINE/RTEBov | -----       | -----         | -----        | -----       |               |            |                |     |
| Stu-rnd-5_family-325_LINE_RTE  | -----       | -----         | -----        | -----       |               |            |                |     |
| Sly-rnd4_family509-LINE/RTEBov | -----       | -----         | -----        | -----       |               |            |                |     |
| Stu-rnd-1_family-513_LINE_RTE  | -----       | -----         | -----        | -----       |               |            |                |     |
| Sly-rnd5_family1442-LINE/RTEBo | -----       | -----         | -----        | -----       |               |            |                |     |
| BovB_GI-RTE-Gehyra_lazelli     | TGCTACTGGG  | GAAGAGCAGA    | GGGCAAGTAC   | AAGTAACCCC  | A - - GAAAGAA | TGAAGCGGCT | GG - GCCAAAG   | 449 |
| BovB_Gv-RTE-Gehyra_variegata   | TGCTACTGGG  | GAAGAGCAGA    | GGGCAAGTAC   | AAGTAACCCC  | A - - GAAAGAA | TGAAGCGGCT | GG - GCCAAAG   | 381 |
| BovB_PMo-RTE-Python_molurus    | TGCTACTGGG  | GAAGAGCGGA    | GGGCAATTCC   | AAGTAGCTCC  | A - - GAAAGAG | TGAAGCGGCT | GG - GCCAAAG   | 324 |
| BovB_Oa-RTE-Ovis_aries         | TGCTACTGGA  | GAAGAGTGGG    | GAGCAATTAC   | TAATAGCTCC  | A - - GAAAGAA | TGAAGAGGCT | GG - GCCAAAG   | 347 |
| BovB-RTE-Bos_taurus            | TGCTACTGGA  | GATCAGTGGG    | GA - - - - - | - AATAACTCC | A - - GAAAGAA | TGAAGGGATG | GA - GCCAAAG   | 945 |
| BovB_Me-RTE-Macropus_eugenii   | TGCTACTGGA  | GAGAAG - AGA  | GTACAACCTC   | AAGTAACCTC  | A - - GACTAA  | TGAAGTGGAT | GG - GCTAAAG   | 156 |
| BovB_Ano-RTE-Amphibolurus_norr | TGCTACTGAG  | GAAGAGCGGA    | GGACAATTAC   | AAGTAGCTCC  | A - - GAGCTAA | TGAAGTGTTT | GG - GCCAAAG   | 394 |
| BovB_Gd-RTE-Eremiascincus_doug | -----       | -----         | -----        | -----       | -----         | -----      | -----          | -   |
| BovB_Er-RTE-Eremiascincus_rich | TGCTACTGGG  | GAAGAGCAGA    | ACACGAGTAC   | TAGTAGCTCC  | A - - GAAAGAG | TGAAGTAGCT | GG - GCCAAAA   | 516 |
| BovB_Ca-RTE-Ctenotus_atlas     | TGCTACTGGG  | GAAGAGCAGA    | ACACGAGTAC   | TAGTAGCTCC  | A - - GAAAGAG | TGAAGTAGCT | GG - GCCAAAC   | 509 |
| BovB_Es-RTE-Egernia_stokesii   | TGCTACTGGG  | GAAGAGCAGA    | GGACAATTAC   | AAGTAGCCCC  | A - - GAAAGAA | TGAAGGAGCT | GG - GCCAAAA   | 338 |
| BovB_Tr-RTE-Tiliqua_rugosa     | TGCTACTGGG  | GAAGAGTGGG    | AGACAATTAC   | AAGTAGCCCC  | A - - GAAAGAA | TGAAGGAGCT | GG - GCCAAAA   | 355 |
| BovB_ALI-RTE-Amblyomma_limbato | TGCTATTGGG  | GAAGAGCGGA    | GGACTAGTAC   | TAGTAGGCGA  | A - - AAAAAAA | ATAAGCGACT | GC - GTCAAAG   | 447 |
| BovB_Hs-RTE-Hydrophis_spiralis | -----       | -----         | -----        | -----       | -----         | -----      | -----          | -   |
| BovB_VA-RTE-Vipera_ammodytes   | TGCTACTGGG  | GAAGAGCAGA    | GGGCTACTAC   | TAGTAGCCCC  | A - - GAAAGAA | TGAAGCGACT | GG - GCCAAAG   | 315 |
| BovB_ACo-RTE-Agkistrodon_conto | TGCTACTGGG  | GAAGAGCAGA    | GGGCTAGTAC   | TAGTAGCGCC  | A - - GAAAGAG | TGAAGCGACT | GG - GCCAAAG   | 318 |
| BovB_Pg-RTE-Perameles_gunnii   | -----       | -----         | -----        | -----       | -----         | -----      | -----          | -   |
| BovB_lo-RTE-Isodon_obesulus    | -----       | -----         | -----        | -----       | -----         | -----      | -----          | -   |
| BovB_Bp-RTE-Burramys_parvulus  | -----       | -----         | -----        | -----       | -----         | -----      | -----          | -   |
| BovB_Pb-RTE-Petaurus_breviceps | -----       | -----         | -----        | -----       | -----         | -----      | -----          | -   |
| BovB_Ma-RTE-Macropus_antilopin | TGGCAAACCA  | CTTCAGTATC    | TTTGCCAAGA   | AAAGTCCCAT  | G - - AACAGTC | TAAAAGATA  | GG - ACAACAG   | 336 |
| BovB_Af-RTE-Antechinus_flavipe | -----       | -----         | -----        | -----       | -----         | -----      | -----          | -   |
| BovB_Ac-RTE-Anolis_carolinensi | TGCTACTGGG  | GAGGAACAGA    | GGACTAGTCC   | AACTAACCCC  | A - - GATGTGA | TGACACAGTT | AA - CTCAAAG   | 279 |
| BovB_BM-RTE-Bombyx_mori        | ACCGGCTACC  | CGGGGCGAG -   | TGGTGTGAAA   | TTGGCTACCG  | AAGCTTCCCA    | TGAAGTGACT | CG - - TCAGG - | 140 |
| BovB_Dr-RTE-Christinus         | ACCTACCAGG  | GAAGAACAA -   | GGGTGTTTTT   | CAAGTAGTCT  | GGGCATTATT    | GACGGGGATT | GG - - ACAAAG  | 186 |
| BovB_La-RTE-Loxodonta_africana | GACAACCTGGA | GAAGAGC - - - | TGCCTCCTCA   | AAGTAGAGCC  | A - - CCTTAAT | CAACGTGGAT | GG - AGTAAAG   | 312 |
| BovB_Pc-RTE-Procavia_capensis  | GATGACTGGG  | GAAGAGC - - - | TGCCTCCTCA   | AAGTAGAGTC  | G - - ACCTTAA | TGACGTGGAT | GG - AGTAAAG   | 313 |
| BovB_Et-RTE-Christinus         | TGTGAGTGAA  | AAAGA - - - - | TGCTTCTCC    | AAGTGGTGCT  | GTGAGTTGGA    | TAAAGCTTGT | GGGAATGGAG     | 153 |
| BovB_Ta-RTE-Tachyglossus_acule | AGCTACTGGA  | GATGAGCAGA    | CGATGTCTCA   | GAGTATCATG  | T - - GTGTTTA | TGACGTGGCC | AG - AATAAAG   | 455 |
| BovB_Plat-RTE-Ornithorhynchus  | AGCTACTGGG  | GAAGAGCAGA    | CGATGTCTCA   | GAGTATCGTG  | G - - GTGTTTA | TGACGTGGCC | GG - AATAAAG   | 439 |
| BovB_Ec-RTE-Equus_caballus     | AGTTACTGGG  | GAAGAGCAAA    | GAAACAAGTAC  | GAATAGCACT  | G - - TTGCTAA | TGATGCAACT | AG - ACTAAAG   | 212 |
| BovB_Cg-RTE-Christinus         | -----       | -----         | -----        | -----       | -----         | -----      | -----          | -   |
| BovB_Bh-RTE-Bothriocroton_hydr | -----       | -----         | -----        | -----       | -----         | -----      | -----          | -   |
| BovB_MI-RTE-Gehyra_variegata   | -----       | -----         | -----        | -----       | -----         | -----      | -----          | -   |
| Sly-rnd1_family284-LINE/RTEBov | -----       | -----         | -----        | -----       | -----         | -----      | -----          | -   |
| Sly-rnd5_family2019-LINE/RTEBo | -----       | -----         | -----        | -----       | -----         | -----      | -----          | -   |
| Sly-rnd3_family322-LINE/RTEBov | -----       | -----         | -----        | -----       | -----         | -----      | -----          | -   |
| Sly-rnd5_family1698-LINE/RTEBo | -----       | -----         | -----        | -----       | -----         | -----      | -----          | -   |
| Sly-rnd1_family795-LINE/RTEBov | -----       | -----         | -----        | -----       | -----         | -----      | -----          | -   |
| Stu-rnd-5_family-3162_LINE_RTE | -----       | -----         | -----        | -----       | -----         | -----      | -----          | -   |
| Sly-rnd6_family1960-LINE/RTEBo | -----       | -----         | -----        | -----       | -----         | -----      | -----          | -   |
| Stu-rnd-5_family-2493_LINE_RTE | -----       | -----         | -----        | -----       | -----         | -----      | -----          | -   |
| Sly-rnd5_family447-LINE/RTEBov | -----       | -----         | -----        | -----       | -----         | -----      | -----          | -   |
| Stu-rnd-6_family-2093_LINE_RTE | -----       | -----         | -----        | -----       | -----         | -----      | -----          | -   |
| Consensus                      | -----       | -----         | -----        | -----       | -----         | -----      | -----          | -   |

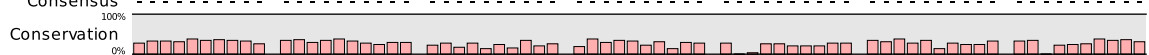

|                                | 1,000       | 1,020       | 1,040      |                                                     |
|--------------------------------|-------------|-------------|------------|-----------------------------------------------------|
| Stu-rnd-1_family-417_LINE_RTE  | -----       | -----       | -----      | -----                                               |
| Sly-rnd1_family377-LINE/RTEBov | -----       | -----       | -----      | -----                                               |
| Stu-rnd-1_family-489_LINE_RTE  | -----       | -----       | -----      | -----                                               |
| Stu-rnd-1_family-607_LINE_RTE  | -----       | -----       | -----      | -----                                               |
| Stu-rnd-1_family-645_LINE_RTE  | -----       | -----       | -----      | -----                                               |
| Sly-rnd4_family81-LINE/RTEBovB | -----       | -----       | -----      | -----                                               |
| Stu-rnd-6_family-408_LINE_RTE  | -----       | -----       | -----      | -----                                               |
| Stu-rnd-1_family-351_LINE_RTE  | -----       | -----       | -----      | -----                                               |
| Stu-rnd-1_family-382_LINE_RTE  | -----       | -----       | -----      | -----                                               |
| Sly-rnd6_family746-LINE/RTEBov | -----       | -----       | -----      | -----                                               |
| Stu-rnd-5_family-325_LINE_RTE  | -----       | -----       | -----      | -----                                               |
| Sly-rnd4_family509-LINE/RTEBov | -----       | -----       | -----      | -----                                               |
| Stu-rnd-1_family-513_LINE_RTE  | -----       | -----       | -----      | -----                                               |
| Sly-rnd5_family1442-LINE/RTEBo | -----       | -----       | -----      | -----                                               |
| BovB_GI-RTE-Gehyra_lazelli     | CCGAAAGGAC  | GCTCAGTTGT  | GGA-----   | -----TGTTG TCTGACGGTG AAAGGAAAGT CCGA - TGCTG 505   |
| BovB_Gv-RTE-Gehyra_variegata   | CCGAAAGGAC  | GCTCAGTTGT  | GGA-----   | -----GGTG TCTGACGGTG AAAGGAAAGT CCGA - TGCTG 437    |
| BovB_PMo-RTE-Python_molurus    | CCGAAAGGAC  | GTTTCAGTCGT | GGA-----   | -----TGCA TCTGGAACGG AAAGAAGGT CCGA - TGCTG 380     |
| BovB_Oa-RTE-Ovis_aries         | CAGAAACAAC  | ACTCAGTTGT  | GGA-----   | -----TGTTG TCTGGTGATG AAAGTAAAGT CCAA - TGCTG 403   |
| BovB-RTE-Bos_taurus            | CAAAAACAAT  | ACCCAGCTGT  | GGA-----   | -----TGTTG ACTGGTGATA GAAGCAAGGT CCGA - TGCTG 1001  |
| BovB_Me-RTE-Macropus_eugenii   | CTGAAAAGAA  | GCTCAGCTGT  | GGA-----   | -----GGGG TCTAATGAAA AAAGGCAATT CTGA - TGCTG 212    |
| BovB_Ano-RTE-Amphibolurus_norr | CCGAAAGGAC  | GCTCAGCTGT  | GGA-----   | -----CGTG CCTGGAAGTG AAAGGAAAGT CCGA - TGCTG 450    |
| BovB_Gd-RTE-Eremiascincus_doug | -----       | -----       | -----      | -----TGTTG TCTGGAAGTG AAGGAAAAGT ACGA - TGCTG 33    |
| BovB_Er-RTE-Eremiascincus_rich | CCGAAAGGAA  | GCTCAGCTGT  | GGA-----   | -----TGTTG TCTGGAAGTG AAAGGAAAGT ACGA - TGCTG 572   |
| BovB_Ca-RTE-Ctenotus_atlas     | CCGGAAGGAA  | ACTCAGCTGT  | GGA-----   | -----TGTA TCTGGAAGTG AAAGGAAAGT GCGA - TGCTG 565    |
| BovB_Es-RTE-Egernia_stokesii   | CCAAAAAGTC  | GCTCAGCTGC  | AGA-----   | -----TGTTG TCTGGAAGTG AAAGGAAAGT CCAA - TGCTG 394   |
| BovB_Tr-RTE-Tiliqua_rugosa     | CCGAAAGGTC  | GCTCAGCTGC  | GGA-----   | -----TGTTG TCTGGAAGTG AAAGGAAAGC CCAA - CGCTG 411   |
| BovB_ALI-RTE-Amblyomma_limbatu | ACGAAAGGAC  | GCACAGTTGC  | GGA-----   | -----TGCA TCTGGTGATG AAAGGAGAGT CCGAATGCTG 504      |
| BovB_Hs-RTE-Hydrophis_spiralis | -----       | -----       | -----      | -----                                               |
| BovB_VA-RTE-Vipera_ammodytes   | CCAAAAAGGAC | ACTCAGCTGT  | GGA-----   | -----TGTTG TCTGGTGTTG AAAGGAAAGT CCGA - TGCTG 371   |
| BovB_ACo-RTE-Agkistrodon_conto | CCGAAAGGAC  | GCTCAGCTGT  | GGA-----   | -----TGCA TCTGGTGTTG AAAGGAAAGT CCGA - TGCTG 374    |
| BovB_Pg-RTE-Perameles_gunnii   | -----       | -----       | -----      | -----                                               |
| BovB_lo-RTE-Isodon_obesulus    | -----       | -----       | -----      | -----                                               |
| BovB_Bp-RTE-Burramys_parvulus  | -----       | -----       | -----      | -----                                               |
| BovB_Pb-RTE-Petaurus_breviceps | -----       | -----       | -----      | -----                                               |
| BovB_Ma-RTE-Macropus_antilopin | AAGAGAAGCC  | CCTCAGTTG   | GAA-----   | -----GGCA TCCAACACAC CACTGAGAAA GAGCAGAGGA 393      |
| BovB_Af-RTE-Antechinus_flavipe | -----       | -----       | -----      | -----                                               |
| BovB_Ac-RTE-Anolis_carolinensi | CCGAAAAGAA  | GGCTAACGGC  | CGA-----   | -----CGGT ACTGGAGGTA AACACAACAT CCGA - TGCTC 335    |
| BovB_BM-RTE-Bombyx_mori        | -CTTCAGAAG  | GAAGGATTGT  | -----      | -----TACTG GCGACTCG - - - AAGA - - C CATCTTAATA 187 |
| BovB_Dr-RTE-Christinus         | CCATCAGGTC  | GCCGACTTGC  | -----      | -----TGATG CTGCTCCAGT TGAAAGAACT CATCTGCGTT 241     |
| BovB_La-RTE-Loxodonta_africana | CTTTCCGGAC  | CTTCATTTGC  | -----      | -----TGATG TGGCAAGACT CAAAATGAGA AGAAACAGCT 367     |
| BovB_Pc-RTE-Procavia_capensis  | CCTTCAGGAT  | CTTCATTTGC  | -----      | -----TGATG TGGCATGACT CAAAATGAGA AGAAACAGCT 368     |
| BovB_Et-RTE-Christinus         | CCTTTGGAAT  | CTTCCTTTGC  | CTATGGGGTA | CTACCTAATG GGGTACCGCT CAAGCAAAGG AGAAACAGCT 223     |
| BovB_Ta-RTE-Tachyglossus_acule | CCTTCGGAAC  | ATCTGGTTGC  | -----      | -----TGATG TTGCCACGCA AGAAATGAGT ATCCAAAGCT 510     |
| BovB_Plat-RTE-Ornithorhynchus  | CCTTCGGGAC  | CTCCGGTCCG  | -----      | -----TGATG TTGCCATACG AGAAATGAGT ATCCGAAAGCT 494    |
| BovB_Ec-RTE-Equus_caballus     | CCAGAAGGAC  | GCTCAGCAGC  | -----      | -----TG AAGTGCACAA AGGTGAAAGG AAAGTCCGAT 264        |
| BovB_Cg-RTE-Christinus         | -----       | -----       | -----      | -----                                               |
| BovB_Bh-RTE-Bothriocroton_hydr | -----       | -----       | -----      | -----                                               |
| BovB_MI-RTE-Gehyra_variegata   | -----       | -----       | -----      | -----                                               |
| Sly-rnd1_family284-LINE/RTEBov | -----       | -----       | -----      | -----                                               |
| Sly-rnd5_family2019-LINE/RTEBo | -----       | -----       | -----      | -----                                               |
| Sly-rnd3_family322-LINE/RTEBov | -----       | -----       | -----      | -----                                               |
| Sly-rnd5_family1698-LINE/RTEBo | -----       | -----       | -----      | -----                                               |
| Sly-rnd1_family795-LINE/RTEBov | -----       | -----       | -----      | -----                                               |
| Stu-rnd-5_family-3162_LINE_RTE | -----       | -----       | -----      | -----                                               |
| Sly-rnd6_family1960-LINE/RTEBo | -----       | -----       | -----      | -----                                               |
| Stu-rnd-5_family-2493_LINE_RTE | -----       | -----       | -----      | -----                                               |
| Sly-rnd5_family447-LINE/RTEBov | -----       | -----       | -----      | -----                                               |
| Stu-rnd-6_family-2093_LINE_RTE | -----       | -----       | -----      | -----                                               |
| Consensus                      | -----       | -----       | -----      | -----                                               |

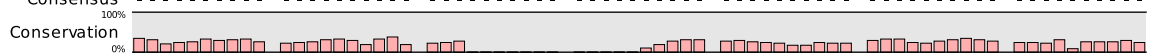

|                                | 1,060               | 1,080               | 1,100               | 1,120               |                     |                     |                     |       |
|--------------------------------|---------------------|---------------------|---------------------|---------------------|---------------------|---------------------|---------------------|-------|
| Stu-rnd-1_family-417_LINE_RTE  | -----               | -----               | -----               | -----               |                     |                     |                     |       |
| Sly-rnd1_family377-LINE/RTEBov | -----               | -----               | -----               | -----               |                     |                     |                     |       |
| Stu-rnd-1_family-489_LINE_RTE  | -----               | -----               | -----               | -----               |                     |                     |                     |       |
| Stu-rnd-1_family-607_LINE_RTE  | -----               | -----               | -----               | -----               |                     |                     |                     |       |
| Stu-rnd-1_family-645_LINE_RTE  | -----               | -----               | -----               | -----               |                     |                     |                     |       |
| Sly-rnd4_family81-LINE/RTEBovB | -----               | -----               | -----               | -----               |                     |                     |                     |       |
| Stu-rnd-6_family-408_LINE_RTE  | -----               | -----               | -----               | -----               |                     |                     |                     |       |
| Stu-rnd-1_family-351_LINE_RTE  | -----               | -----               | -----               | -----               |                     |                     |                     |       |
| Stu-rnd-1_family-382_LINE_RTE  | -----               | -----               | -----               | -----               |                     |                     |                     |       |
| Sly-rnd6_family746-LINE/RTEBov | -----               | -----               | -----               | -----               |                     |                     |                     |       |
| Stu-rnd-5_family-325_LINE_RTE  | -----               | -----               | -----               | -----               |                     |                     |                     |       |
| Sly-rnd4_family509-LINE/RTEBov | -----               | -----               | -----               | -----               |                     |                     |                     |       |
| Stu-rnd-1_family-513_LINE_RTE  | -----               | -----               | -----               | -----               |                     |                     |                     |       |
| Sly-rnd5_family1442-LINE/RTEBo | -----               | -----               | -----               | -----               |                     |                     |                     |       |
| BovB_GI-RTE-Gehyra_lazelli     | CAA A - GA A C A    | A T A C T G C A T A | G G A A C C T G G A | A C G T C A G A T C | --- T A T G A A T   | C A A G G T A A G C | T C G A C G T G G T | 571   |
| BovB_Gv-RTE-Gehyra_variegata   | CAA A - GA A C A    | A T A C T G C A T A | G G A A C C T G G A | A C G T C A G A T C | --- T A T G A A T   | C A A G G T A A G C | T C G A C G T G G T | 503   |
| BovB_PMo-RTE-Python_molurus    | CAA A - GA A C A    | A T A T T G C A T A | G G A A C C T G G A | A T G T A A G A T C | --- T A T G A A T   | C A A G G C A A G C | T G G A T G T G G T | 446   |
| BovB_Oa-RTE-Ovis_aries         | T A A A - G A A C A | A T A T T G C A T A | G G A A C C T G G A | A T G T T A G G T C | --- C A T G A A T   | C A A G G T A A A T | T G G A A G T G G T | 469   |
| BovB-RTE-Bos_taurus            | T A A A - G A G C A | A T A T T G C A T A | G G A A C C T G G A | A T G T C A G G T C | --- C A T G A A T   | C A A G G C A A A T | T G G A A G T G G T | 1067  |
| BovB_Me-RTE-Macropus_eugenii   | T A G G - G T G - A | T T A T T A C A T A | A A A T T G T G G A | A T G T A A A A T C | --- T C T G A C A   | C A A G G T A A G C | T G G A T G C A G T | 277   |
| BovB_Ano-RTE-Amphibolurus_norr | CAA A - G A A G A   | A T A C T G C A T A | G G A A C C T G G A | A T G T A A G A T C | --- T A T G A A C   | C T T G G G A A G C | T G G A G T G G T   | 516   |
| BovB_Gd-RTE-Eremiascincus_doug | CAA A - G A A G A   | A T A C T G C A T A | G G A A C C T G G A | A C G T C A G A T C | --- T A T G A A T   | C A - G G T A A G C | T C G A T G T G G T | 98    |
| BovB_Er-RTE-Eremiascincus_rich | CAA A A G A A C A   | A T A C T G C A T A | G G A A C C T G G A | A C G T C A G A T C | --- T A T G A A T   | C A A G G T A A G C | T C G A T G T G G T | 639   |
| BovB_Ca-RTE-Ctenotus_atlas     | CAA A - G G A C A   | A T A C T G C A T A | G G A A C C T G G A | A C G T C A G A T C | --- T A T G A A T   | C A A G G T A A G T | T A G A T G T G G T | 631   |
| BovB_Es-RTE-Egernia_stokesii   | T A A A - G A A C A | A C A C T G C A T A | G G A A C C T G G A | A C G T G A G A T C | --- T A T G A A T   | C A A G G A A A A C | T G G A T G T G G T | 460   |
| BovB_Tr-RTE-Tiliqua_rugosa     | T A A A - G A A C A | A C A T T G C A T A | G G A A C C T G G A | A T G T G A G A T C | --- T A T G A A T   | T G A G G T A A G C | T G G A T G T G G T | 477   |
| BovB_ALI-RTE-Amblyomma_limbatu | T A A A G A T C T T | T G A C T C C A T A | G G A A C C T G G A | A T A T A A G A T C | --- T A T G A A T   | C A A G G C A A G C | T A G A T T T G G T | 571   |
| BovB_Hs-RTE-Hydrophis_spiralis | -----               | -----               | -----               | -----               | -----               | -----               | -----               | ----- |
| BovB_VA-RTE-Vipera_ammodytes   | T A A A G A T T T T | T T - C T C C A T A | G G A A C C T G G A | A T G T A A G A T C | --- C A T G A A T   | C A A G G A A A G C | T G G A C G T G G T | 437   |
| BovB_ACo-RTE-Agkistrodon_conto | T A A A G A T C T T | T T - C T C C A T A | G G A A C C T G G A | A T G T A A G A T C | --- C A T G A A T   | C A A G G C A A G C | T A G A C G T G G T | 440   |
| BovB_Pg-RTE-Perameles_gunnii   | -----               | -----               | -----               | -----               | -----               | -----               | -----               | ----- |
| BovB_lo-RTE-Isodon_obesulus    | -----               | -----               | -----               | -----               | -----               | -----               | -----               | ----- |
| BovB_Bp-RTE-Burramys_parvulus  | -----               | -----               | -----               | -----               | -----               | -----               | -----               | ----- |
| BovB_Pb-RTE-Petaurus_breviceps | -----               | -----               | -----               | -----               | -----               | -----               | -----               | ----- |
| BovB_Ma-RTE-Macropus_antilopin | C A A C T A C A A G | G T A G C T C C A G | A A C A A A T G A A | G C A G A T G G A C | --- C A A A G C C   | A A A A G G A A G C | T C A G C T G T G G | 460   |
| BovB_Af-RTE-Antechinus_flavipe | -----               | -----               | -----               | -----               | -----               | -----               | -----               | ----- |
| BovB_Ac-RTE-Anolis_carolinensi | T A A A - G A T C A | A C A C A C T A T A | A G A A C C T A G A | A T G T A A G A T C | --- T A T G A G C   | C A G G G C A A A C | T G G A C A T G G T | 401   |
| BovB_BM-RTE-Bombyx_mori        | C - - G C A A A C A | A C A G C G T A T T | A G C A C G T G G A | A T G T G A A T G G | G C T T C T T C A A | G C G G G A A A A C | T A T C C A T C G T | 255   |
| BovB_Dr-RTE-Christinus         | T T A G G A A G G T | T C A T A G C A T C | G G A G C T T G G A | A T G T C C G T G G | --- C A T G A G T   | A T G G G C A A A C | T G G A A A T C G T | 308   |
| BovB_La-RTE-Loxodonta_africana | G C A A A C A T C C | A T T A A T A A T C | G G A A C C T G G A | A T G T A C G A A G | --- T A T G A A T   | C T A G G A A A A T | T G G A A A T C G T | 434   |
| BovB_Pc-RTE-Procavia_capensis  | G C A A A C A T C C | A T T A A T A A T T | G G A A C A T G G A | A T G T A C G A A G | --- T A T G A A T   | C T A G G A A A A T | T G G A A A T T G T | 435   |
| BovB_Et-RTE-Christinus         | G C A A A A A T A T | T C T A A T G A T T | G G A A C T T G G A | A T G T G T G A A A | --- T A T G A A T   | C T A G G A A A G T | T G G A A A T G G T | 290   |
| BovB_Ta-RTE-Tachyglossus_acule | G T A A A G A T A C | C C T T A T T A C T | G C A A C A T G G A | A T G T A C A A A G | --- T A T G A A C   | C A G G G A A A G C | T G G A A A T A A T | 577   |
| BovB_Plat-RTE-Ornithorhynchus  | G T A A A G A T A C | C C T T A T T A T T | G G A A C A T G G A | A T G T G C G G A G | --- T A T G A A C   | C A G G G A A A G C | T G G A A A T A G T | 561   |
| BovB_Ec-RTE-Equus_caballus     | G C T G T A C C A C | A C A C A C A A T T | G G A A C A T G G A | A C G T G A G A A G | --- C A T G A A C   | C A A G G T A A A C | T G G A A A T T G T | 331   |
| BovB_Cg-RTE-Christinus         | -----               | -----               | -----               | -----               | -----               | -----               | -----               | ----- |
| BovB_Bh-RTE-Bothriocroton_hydr | -----               | -----               | -----               | -----               | -----               | -----               | -----               | ----- |
| BovB_MI-RTE-Gehyra_variegata   | -----               | -----               | -----               | -----               | -----               | -----               | -----               | ----- |
| Sly-rnd1_family284-LINE/RTEBov | -----               | -----               | -----               | -----               | -----               | -----               | -----               | ----- |
| Sly-rnd5_family2019-LINE/RTEBo | -----               | -----               | -----               | -----               | -----               | -----               | -----               | ----- |
| Sly-rnd3_family322-LINE/RTEBov | -----               | -----               | -----               | -----               | -----               | -----               | -----               | ----- |
| Sly-rnd5_family1698-LINE/RTEBo | -----               | -----               | -----               | -----               | -----               | -----               | -----               | ----- |
| Sly-rnd1_family795-LINE/RTEBov | -----               | -----               | -----               | -----               | -----               | -----               | -----               | ----- |
| Stu-rnd-5_family-3162_LINE_RTE | -----               | -----               | -----               | -----               | -----               | -----               | -----               | ----- |
| Sly-rnd6_family1960-LINE/RTEBo | -----               | -----               | -----               | -----               | -----               | -----               | -----               | ----- |
| Stu-rnd-5_family-2493_LINE_RTE | -----               | -----               | -----               | -----               | -----               | -----               | -----               | ----- |
| Sly-rnd5_family447-LINE/RTEBov | -----               | -----               | -----               | -----               | -----               | -----               | -----               | ----- |
| Stu-rnd-6_family-2093_LINE_RTE | -----               | -----               | -----               | -----               | -----               | -----               | -----               | ----- |
| Consensus                      | -----               | -----               | -----               | -----               | -----               | -----               | -----               | ----- |

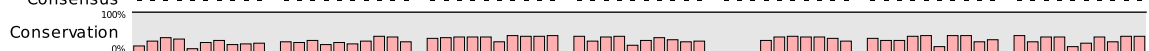

|                                | 1,140       |             | 1,160       |            | 1,180      |                                     |
|--------------------------------|-------------|-------------|-------------|------------|------------|-------------------------------------|
| Stu-rnd-1_family-417_LINE RTE  | -----       | -----       | -----       | -----      | -----      | -----                               |
| Sly-rnd1_family377-LINE/RTEBov | -----       | -----       | -----       | -----      | -----      | -----                               |
| Stu-rnd-1_family-489_LINE RTE  | -----       | -----       | -----       | -----      | -----      | -----                               |
| Stu-rnd-1_family-607_LINE RTE  | -----       | -----       | -----       | -----      | -----      | -----                               |
| Stu-rnd-1_family-645_LINE RTE  | -----       | -----       | -----       | -----      | -----      | -----                               |
| Sly-rnd4_family81-LINE/RTEBovB | -----       | -----       | -----       | -----      | -----      | -----                               |
| Stu-rnd-6_family-408_LINE RTE  | -----       | -----       | -----       | -----      | -----      | -----                               |
| Stu-rnd-1_family-351_LINE RTE  | -----       | -----       | -----       | -----      | -----      | -----                               |
| Stu-rnd-1_family-382_LINE RTE  | -----       | -----       | -----       | -----      | -----      | -----                               |
| Sly-rnd6_family746-LINE/RTEBov | -----       | -----       | -----       | -----      | -----      | -----                               |
| Stu-rnd-5_family-325_LINE RTE  | -----       | -----       | -----       | -----      | -----      | -----                               |
| Sly-rnd4_family509-LINE/RTEBov | -----       | -----       | -----       | -----      | -----      | -----                               |
| Stu-rnd-1_family-513_LINE RTE  | -----       | -----       | -----       | -----      | -----      | -----                               |
| Sly-rnd5_family1442-LINE/RTEBo | -----       | -----       | -----       | -----      | -----      | -----                               |
| BovB_GI-RTE-Gehyra_lazelli     | CAAAAAATGAG | ATGGCAAGAC  | TGAACATTGA  | CATCTTGGGA | A-TCAGTGAA | C--TAAAGT- GGACGGGAAT 637           |
| BovB_Gv-RTE-Gehyra_variegata   | CAAAAAATGAG | ATGGTAAGAC  | TGAACATTGA  | CATCTTGGGA | A-TCAGTGAA | C--TAAAGT- GGACGGGAAT 569           |
| BovB_PMo-RTE-Python_molurus    | CAAAACATGAG | ATGACAAGAT  | TGAACATCGA  | CATCTTGGGA | A-TCAGCGAA | T--TGAAAT- GGACGGGAAT 512           |
| BovB_Oa-RTE-Ovis_aries         | CAAACAGGAG  | ATGGCAAGAG  | TGAACATCGA  | CATCTTAGGA | A-TCAGTGAA | C--TAAAT- GGACTGGAAT 535            |
| BovB-RTE-Bos_taurus            | CAACAAGAG   | ATGGCAAGAG  | TGAATGTCTGA | CATTCTAGGA | A-TCAGCGAA | C--TGAAAT- GGACTGGAAT 1133          |
| BovB_Me-RTE-Macropus_eugenii   | CAAAAT--GGG | ATGA-AAAA   | TAAACATCGA  | CACCTAAGGT | G-TCAGTGAA | C--TCAAAT- GCATGGGAAT 340           |
| BovB_Ano-RTE-Amphibolurus_norr | CAAACAGGAG  | ATGGCAAGAA  | TAAACATCGA  | CATCCTGGGC | A-TCAGTGAA | C--TAAAT- GGACAGGAAT 582            |
| BovB_Gd-RTE-Eremiascincus_doug | CAAACGCGAG  | ATGTCAAGAC  | TGAACATCGA  | CATCATGGGA | GGTCAGCGAA | C--TAAAT- GGACAGGAAT 166            |
| BovB_Er-RTE-Eremiascincus_rich | CAAACGCGAG  | ATGTCAAGGC  | TGAACATCGA  | CATCATGGGA | G-TTAGTGAA | C--TAAAT- GGACAGGAAT 705            |
| BovB_Ca-RTE-Ctenotus_atlas     | CAAACGCTGAG | ATGTCAAGGC  | TGAACATAGA  | CCTCATGGGA | G-TCAGTGAA | C--TAAAT- GGACAGGAAT 697            |
| BovB_Es-RTE-Egernia_stokesii   | CAAAACATGAG | ATGGCAAGAT  | TGAACACCGA  | CATCTTCGGA | A-TTAGTGAA | CTTAAAAAT- GGACAGGAAT 528           |
| BovB_Tr-RTE-Tiliqua_rugosa     | CCAACATGAG  | ATGGCAAGAT  | TGAACATTGA  | CATCTTGGGA | A-TTAGTGAA | C--TAAAT- GGAAAGGAAT 543            |
| BovB_ALI-RTE-Amblyomma_limbatu | CAAAGAAGAG  | ATGACAAGAC  | TGAACATCGA  | CATCTTAGGA | A-TCAATGAA | C--TAAATG GATAGGAAGT 638            |
| BovB_Hs-RTE-Hydrophis_spiralis | -----       | -----       | -----       | -----      | -----      | -----                               |
| BovB_VA-RTE-Vipera_ammodytes   | CAACAAGAG   | ATGACAAGAT  | TGAACATCGA  | CATCTTAGGA | G-TCAGCGAA | C--TAAATG GACAGGAA-T 503            |
| BovB_ACo-RTE-Agkistrodon_conto | CAACAAGAG   | ATGACAAGAC  | TGAACATCGA  | CATCTTAGGA | A-TCAGCGAA | C--TAAATG GACAGGAA-T 506            |
| BovB_Pg-RTE-Perameles_gunnii   | -----       | -----       | -----       | -----      | -----      | -----                               |
| BovB_lo-RTE-Isodon_obesulus    | -----       | -----       | -----       | -----      | -----      | -----                               |
| BovB_Bp-RTE-Burramys_parvulus  | -----       | -----       | -----       | -----      | -----      | -----                               |
| BovB_Pb-RTE-Petaurus_breviceps | -----       | -----       | -----       | -----      | -----      | -----                               |
| BovB_Ma-RTE-Macropus_antilopin | GTGAAACGC   | CGGTGAAAG   | AAAGACCAAC  | ACCGTAAAGA | AAAACAGATC | ACAAGAACCA GGAACCAAAG 530           |
| BovB_Af-RTE-Antechinus_flavipe | -----       | -----       | -----       | -----      | -----      | -----                               |
| BovB_Ac-RTE-Anolis_carolinensi | TATTGGTGAA  | ATGTCAAGAT  | TAAAGATAGA  | CATTCTGGGA | G-TCAGTGAA | C--TGAAAT- GGACTAGAAT 467           |
| BovB_BM-RTE-Bombyx_mori        | CGAAAAAGAA  | ATGGAAAAATC | ACAACCTGTCT | AATTCTGGGC | A-TCTGCGAG | A--CACATAT GAGAAACAAT 322           |
| BovB_Dr-RTE-Christinus         | GAAATCTGAA  | ATGGAACGTC  | TCAACATCGA  | CATTATCGCC | A-TTAGTGAG | C--TCCATTG GACAGGCAAT 375           |
| BovB_La-RTE-Loxodonta_africana | -----       | -----       | -----       | -----      | -----      | -----                               |
| BovB_Pc-RTE-Procavia_capensis  | -----       | -----       | -----       | -----      | -----      | -----                               |
| BovB_Pc-RTE-Procavia_capensis  | CAAAAAATGAA | ATGGAATGCA  | TAAACATCAA  | TATCCTAGGC | A-TTAGTGAG | C--TGAAATG GACTGGTATT 500           |
| BovB_Pc-RTE-Procavia_capensis  | CAAAAAATGAA | ATGGAATGCA  | TAAACATCAA  | TATCCTAGGC | A-TTAGTGAG | C--TGAAATG GACTGGTATT 502           |
| BovB_Et-RTE-Christinus         | CAAAACATGAA | ATGGAATGCA  | TAAATGATCAA | TATCACAGGC | A-TAAGTGAG | C--TGAAAT GACTGATATT 357            |
| BovB_Ta-RTE-Tachyglossus_acule | CAAGAATGAA  | ATGGACTGAT  | TGAAGATCGA  | CATCCTAAGA | A-TAAGCAA  | A--TGAAATG GACTGGTATT 644           |
| BovB_Plat-RTE-Ornithorhynchus  | CAAGAATGAA  | ATGGACCGAT  | TGAAGATCGA  | CATCCTAGGA | A-TAAGCGAA | C--TGAAATG GACTGGTATT 628           |
| BovB_Ec-RTE-Equus_caballus     | AAAGCAAGAA  | ATGGAACATT  | TAAATATTGC  | AGTGCTTGGT | G-TTAGCGAA | C--TAAATG GACTGGAATG 398            |
| BovB_Cg-RTE-Christinus         | -----       | -----       | CTTT        | TGTAGACTAA | CAGCAGTGCT | A-CT--TCAG C--TAACCCT GGTTAGTACT 49 |
| BovB_Bh-RTE-Bothriocroton_hydr | -----       | -----       | -----       | -----      | -----      | -----                               |
| BovB_MI-RTE-Gehyra_variegata   | -----       | -----       | -----       | -----      | -----      | -----                               |
| Sly-rnd1_family284-LINE/RTEBov | -----       | -----       | -----       | -----      | -----      | -----                               |
| Sly-rnd5_family2019-LINE/RTEBo | -----       | -----       | -----       | -----      | -----      | -----                               |
| Sly-rnd3_family322-LINE/RTEBov | -----       | -----       | -----       | -----      | -----      | -----                               |
| Sly-rnd5_family1698-LINE/RTEBo | -----       | -----       | -----       | -----      | -----      | -----                               |
| Sly-rnd1_family795-LINE/RTEBov | -----       | -----       | -----       | -----      | -----      | -----                               |
| Stu-rnd-5_family-3162_LINE RTE | -----       | -----       | -----       | -----      | -----      | -----                               |
| Sly-rnd6_family1960-LINE/RTEBo | -----       | -----       | -----       | -----      | -----      | -----                               |
| Stu-rnd-5_family-2493_LINE RTE | -----       | -----       | -----       | -----      | -----      | -----                               |
| Sly-rnd5_family447-LINE/RTEBov | -----       | -----       | -----       | -----      | -----      | -----                               |
| Stu-rnd-6_family-2093_LINE RTE | -----       | -----       | -----       | -----      | -----      | -----                               |
| Consensus                      | -----       | -----       | -----       | -----      | -----      | -----                               |

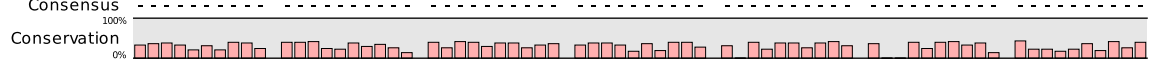

|                                | 1,200          | 1,220        | 1,240       | 1,260                                       |      |
|--------------------------------|----------------|--------------|-------------|---------------------------------------------|------|
| Stu-rnd-1_family-417_LINE RTE- | -----          | -----        | -----       | -----                                       | -    |
| Sly-rnd1_family377-LINE/RTEBov | -----          | -----        | -----       | -----                                       | -    |
| Stu-rnd-1_family-489_LINE RTE- | -----          | -----        | -----       | -----                                       | -    |
| Stu-rnd-1_family-607_LINE RTE- | -----          | -----        | -----       | -----                                       | -    |
| Stu-rnd-1_family-645_LINE RTE- | -----          | -----        | -----       | -----                                       | -    |
| Sly-rnd4_family81-LINE/RTEBovB | -----          | -----        | -----       | -----                                       | -    |
| Stu-rnd-6_family-408_LINE RTE- | -----          | -----        | -----       | -----                                       | -    |
| Stu-rnd-1_family-351_LINE RTE- | -----          | -----        | -----       | -----                                       | -    |
| Stu-rnd-1_family-382_LINE RTE- | -----          | -----        | -----       | -----                                       | -    |
| Sly-rnd6_family746-LINE/RTEBov | -----          | -----        | -----       | -----                                       | -    |
| Stu-rnd-5_family-325_LINE RTE- | -----          | -----        | -----       | -----                                       | -    |
| Sly-rnd4_family509-LINE/RTEBov | -----          | -----        | -----       | -----                                       | -    |
| Stu-rnd-1_family-513_LINE RTE- | -----          | -----        | -----       | -----                                       | -    |
| Sly-rnd5_family1442-LINE/RTEBo | -----          | -----        | -----       | -----                                       | -    |
| BovB_GI-RTE-Gehyra_lazelli     | GGGCGAATTC     | AACT - CAGA  | AGACCATTAT  | -----                                       | 665  |
| BovB_Gv-RTE-Gehyra_variegata   | GGGCGAATTC     | AACT - CAGA  | AGACCATTAT  | -----                                       | 597  |
| BovB_PMo-RTE-Python_molurus    | GGGTGAATTT     | AATT - CAGG  | TGACCATTAT  | -----                                       | 540  |
| BovB_Oa-RTE-Ovis_aries         | GGGTGAATTT     | AATT - CAGA  | TGACCATTAT  | -----                                       | 563  |
| BovB-RTE-Bos_taurus            | GGGTGAATTT     | AACT - CAGA  | TGACCATTAT  | -----                                       | 1161 |
| BovB_Me-RTE-Macropus_eugenii   | GGATGAATTT     | AATT - CAGT  | GAATTATTAT  | GTATGTATAT ATATATGTGC ACACACATAT ATGTATACAC | 408  |
| BovB_Ano-RTE-Amphibolurus_norr | GGGTGAATTC     | AGCT - CAGA  | TGATTATCAT  | -----                                       | 610  |
| BovB_Gd-RTE-Eremiascincus_doug | GGGAGAATTT     | AATT - CAGA  | TGACCATTAT  | -----                                       | 194  |
| BovB_Er-RTE-Eremiascincus_rich | GGGAGAATTT     | AATT - CAGA  | TGACCATTAT  | -----                                       | 733  |
| BovB_Ca-RTE-Ctenotus_atlas     | GGGAGAATTT     | AATT - CAGA  | TGACCATTAT  | -----                                       | 725  |
| BovB_Es-RTE-Egernia_stokesii   | GGGCAAAATTT    | AATT - CAGA  | CGAACATTAT  | -----                                       | 556  |
| BovB_Tr-RTE-Tiliqua_rugosa     | GGGCAAAATTT    | AATT - CAGA  | TGAACATTAT  | -----                                       | 571  |
| BovB_ALI-RTE-Amblyomma_limbato | GGGTGAATTT     | ACTTT - CAGA | TGACCATCAG  | -----                                       | 667  |
| BovB_Hs-RTE-Hydrophis_spiralis | -----          | -----        | -----       | -----                                       | -    |
| BovB_VA-RTE-Vipera_ammodytes   | GGGTGAATTT     | AATT - CAGA  | TGACCATCAG  | -----                                       | 531  |
| BovB_ACo-RTE-Agkistrodon_conto | GGGTGAATTT     | AATT - CAGA  | -GACCATCAG  | -----                                       | 533  |
| BovB_Pg-RTE-Perameles_gunnii   | -----          | -----        | -----       | -----                                       | -    |
| BovB_lo-RTE-Isodon_obesulus    | -----          | -----        | -----       | -----                                       | -    |
| BovB_Bp-RTE-Burramys_parvulus  | -----          | -----        | -----       | -----                                       | -    |
| BovB_Pb-RTE-Petaurus_breviceps | -----          | -----        | -----       | -----                                       | -    |
| BovB_Ma-RTE-Macropus_antilopin | AAAGATGAAC     | CAAGG - GAAG | CTGGATGAGG  | TCAAACAGGA GAAAAAAGA TTAACATCA ACATCCTGGG   | 599  |
| BovB_Af-RTE-Antechinus_flavipe | -----          | -----        | -----       | -----                                       | -    |
| BovB_Ac-RTE-Anolis_carolinensi | GGGCCACATC     | ACAA - AAGA  | TGACCACCAG  | -----                                       | 495  |
| BovB_BM-RTE-Bombyx_mori        | GGCCATTTTA     | AAACATCTAC   | TGAAATACT   | -----                                       | 352  |
| BovB_Dr-RTE-Christinus         | GGTTTTTTTA     | ACAG - TGA   | TGACCATACC  | -----                                       | 402  |
| BovB_La-RTE-Loxodonta_africana | GGCCATTTTG     | AATCA - GA   | CAATCATATA  | -----                                       | 527  |
| BovB_Pc-RTE-Procavia_capensis  | GGCCATTTTG     | AATCT - GA   | CAATCATATG  | -----                                       | 529  |
| BovB_Et-RTE-Christinus         | GGTCATTTTG     | AATCA - GA   | AAATCAT - G | -----                                       | 382  |
| BovB_Ta-RTE-Tachyglossus_acule | GGGCATTTCC     | AATCA - AA   | TGAGCACATC  | -----                                       | 671  |
| BovB_Plat-RTE-Ornithorhynchus  | GGGCATTTCC     | AATCG - AA   | TGAGCACATC  | -----                                       | 655  |
| BovB_Ec-RTE-Equus_caballus     | GGACACTTTC     | AGTCA - GA   | CAACTACAAA  | -----                                       | 425  |
| BovB_Cg-RTE-Christinus         | ATGCAG - - - - | AAGAA - GG   | CAATGGCAAA  | -----                                       | 72   |
| BovB_Bh-RTE-Bothriocroton_hydr | -----          | -----        | -----       | -----                                       | -    |
| BovB_MI-RTE-Gehyra_variegata   | -----          | -----        | -----       | -----                                       | -    |
| Sly-rnd1_family284-LINE/RTEBov | -----          | -----        | -----       | -----                                       | -    |
| Sly-rnd5_family2019-LINE/RTEBo | -----          | -----        | -----       | -----                                       | -    |
| Sly-rnd3_family322-LINE/RTEBov | -----          | -----        | -----       | -----                                       | -    |
| Sly-rnd5_family1698-LINE/RTEBo | -----          | -----        | -----       | -----                                       | -    |
| Sly-rnd1_family795-LINE/RTEBov | -----          | -----        | -----       | -----                                       | -    |
| Stu-rnd-5_family-3162_LINE RTE | -GTAATCTCC     | GGCGACCGCT   | TTCCGATCTC  | CTCTCAGTTC CCGGTAAGTC AAGATCTGCT CTCTCTCTTT | 69   |
| Sly-rnd6_family1960-LINE/RTEBo | -----          | -----        | -----       | -----                                       | -    |
| Stu-rnd-5_family-2493_LINE RTE | -----          | -----        | -----       | -----                                       | -    |
| Sly-rnd5_family447-LINE/RTEBov | -----          | -----        | -----       | -----                                       | -    |
| Stu-rnd-6_family-2093_LINE RTE | -----          | -----        | -----       | -----                                       | -    |
| Consensus                      | -----          | -----        | -----       | -----                                       | -    |

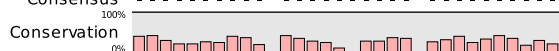



|                                | 1,280                                                                                | 1,300 | 1,320 |     |
|--------------------------------|--------------------------------------------------------------------------------------|-------|-------|-----|
| Stu-rnd-1_family-417_LINE_RTE  | ---                                                                                  | ---   | ---   | --- |
| Sly-rnd1_family377-LINE/RTEBov | ---                                                                                  | ---   | ---   | --- |
| Stu-rnd-1_family-489_LINE_RTE  | ---                                                                                  | ---   | ---   | --- |
| Stu-rnd-1_family-607_LINE_RTE  | ---                                                                                  | ---   | ---   | --- |
| Stu-rnd-1_family-645_LINE_RTE  | ---                                                                                  | ---   | ---   | --- |
| Sly-rnd4_family81-LINE/RTEBovB | ---                                                                                  | ---   | ---   | --- |
| Stu-rnd-6_family-408_LINE_RTE  | ---                                                                                  | ---   | ---   | --- |
| Stu-rnd-1_family-351_LINE_RTE  | ---                                                                                  | ---   | ---   | --- |
| Stu-rnd-1_family-382_LINE_RTE  | ---                                                                                  | ---   | ---   | --- |
| Sly-rnd6_family746-LINE/RTEBov | ---                                                                                  | ---   | ---   | --- |
| Stu-rnd-5_family-325_LINE_RTE  | ---                                                                                  | ---   | ---   | --- |
| Sly-rnd4_family509-LINE/RTEBov | ---                                                                                  | ---   | ---   | --- |
| Stu-rnd-1_family-513_LINE_RTE  | ---                                                                                  | ---   | ---   | --- |
| Sly-rnd5_family1442-LINE/RTEBo | ---                                                                                  | ---   | ---   | --- |
| BovB_GI-RTE-Gehyra_lazelli     | -- ATCTACTA CTGTGGCCAT GAATCCCGTA GAAAAAATGG TGTGGCCTTT ATAGTCAACA AGAGAGTGCA 733    |       |       |     |
| BovB_Gv-RTE-Gehyra_variegata   | -- ATCTACTA CTGTGGCCAT GAATCCCGTA GAAAAAATGG TGTGGCCTTT ATAGTCAACA AGAGAGTGCA 665    |       |       |     |
| BovB_PMo-RTE-Python_molurus    | -- ATCTACTA CTGTGGCAA - GAAACCCCTTA GAAGAAATGG AGTTGCACTC ATAGTCAATA AGAGAGTGGG 607  |       |       |     |
| BovB_Oa-RTE-Ovis_aries         | -- ATCTACTA CTGTGGGCCAA GAATCCCTTA GAAGAAATGG AGTAGCCCTC ATAGTCAACA AAAGAGCTG 631    |       |       |     |
| BovB-RTE-Bos_taurus            | -- ATCTACTA CTGCGGGCAG GAATCCCTCA GAAGAAATGG AGTGGCCATC ATGGTCAACA AAAGAGTCCG 1229   |       |       |     |
| BovB_Me-RTE-Macropus_eugenii   | ACATATGCCA CTG -GGGCAA GAAGTCTTTA GAAGAAGCAA AGTAGCCCTC ATAGTCAACA TAGC - - TAAG 475 |       |       |     |
| BovB_Ano-RTE-Amphibolurus_norr | -- ATCTACTA TTGTGGGCCAA GAATCCCGTA GAAGAAATGG AGTAGCCTTC ATAGTCAACA AAAGAGTGGG 678   |       |       |     |
| BovB_Gd-RTE-Eremiascincus_doug | -- ATCTGCTA CTGTGGGCAG GAATCCCTTA GAAGAAATGG AGTAGCCTTC ATCGTGAACA AGAGAGTGAG 262    |       |       |     |
| BovB_Er-RTE-Eremiascincus_rich | -- ATCTGCTA CTGTGGGCAG GAATCCCTTA GAAGAAATGG AGTAGCCTTC ATCGTGAACA AGAGAGTGAG 801    |       |       |     |
| BovB_Ca-RTE-Ctenotus_atlas     | -- ATCTACTA CTGTGGGCAG GAATCCCTTA GAAGAAACGG CGTAGCCTTC ATAGTGAACA AGAGAATGAG 793    |       |       |     |
| BovB_Es-RTE-Egernia_stokesii   | -- ATTTACTA CTGTGGACAA GAATCCCATTA GAAGAAATGG AGTAGCCCTC ATAGTAAACA AAAGAAATGGG 624  |       |       |     |
| BovB_Tr-RTE-Tiliqua_rugosa     | -- ATTTACTA CTGTGGACAA GAATCCCATTA GAAGAAATAG AGTAGCCCTC ATTTGGAACA AAAGAAATGGG 639  |       |       |     |
| BovB_ALI-RTE-Amblyomma_limbatu | -- ATATAAAA CTGCGGGTAA GAATCCCTCA CAAGAAATTG AGTAGCCTTC ATATTCATA AAAAAATTAGG 735    |       |       |     |
| BovB_Hs-RTE-Hydrophis_spiralis | ---                                                                                  | ---   | ---   | --- |
| BovB_VA-RTE-Vipera_ammodytes   | -- GTATACTA CTGCGGGCAG GAATCCCTCA GAAGAAATGG AGTAGCCTTC ACAGTCAATA AAAGAGTAGA 599    |       |       |     |
| BovB_ACo-RTE-Agkistrodon_conto | -- GTATACTA CTGCGGGCAA GAATCCCTCA GAAGAAATGG AGTAGCCTTC ATAGTCAATA AAAGAGTAGG 601    |       |       |     |
| BovB_Pg-RTE-Perameles_gunnii   | ---                                                                                  | ---   | ---   | --- |
| BovB_lo-RTE-Isodon_obesulus    | ---                                                                                  | ---   | ---   | --- |
| BovB_Bp-RTE-Burramys_parvulus  | ---                                                                                  | ---   | ---   | --- |
| BovB_Pb-RTE-Petaurus_breviceps | ---                                                                                  | ---   | ---   | --- |
| BovB_Ma-RTE-Macropus_antilopin | TGTCAGTGAA CTTAAATGAA TGAGAATGGG TAAATTTAAT TCAGGTGATC ACTACATATA CTACCGCGGA 669     |       |       |     |
| BovB_Af-RTE-Antechinus_flavipe | ---                                                                                  | ---   | ---   | --- |
| BovB_Ac-RTE-Anolis_carolinensi | -- ATCTACTA CAGCGGACAA GAGGAACACC GAAGAAATGG AGTAGCCTTC ATAATTAATA ACAAAGTTGC 563    |       |       |     |
| BovB_BM-RTE-Bombyx_mori        | -- GTGTACTT CTCAGGTAAT GAAAAATCAA GCAGAAATGG AGTTGCAATT GTGCTGCCAC CCTACTCGAA 420    |       |       |     |
| BovB_Dr-RTE-Christinus         | -- GTCTACTA CTCTGGGAAC AACAACATAA GACGCAATGG AGTAGCTGTC ATCTTAAACA AGAAAAATGC 470    |       |       |     |
| BovB_La-RTE-Loxodonta_africana | -- GTCTACTA TGCTGGGAAT GACAACCTGA AGAGGAATGG CATTGCATTTC ATCGTCAAAA AGAACATTTTC 595  |       |       |     |
| BovB_Pc-RTE-Procavia_capensis  | -- GTCTACTA TGCTGGGAAT GAAAACTTGA AGAGGAATGG TGTTCATTTC ATCATCAAAA AGAACATTTTC 597   |       |       |     |
| BovB_Et-RTE-Christinus         | -- ATTTACTA TGTCAGGTAT AACA - - CAA TCATGAATGG CATGACATTTC ACTGTCAAAA AGGATATACC 447 |       |       |     |
| BovB_Ta-RTE-Tachyglossus_acule | -- ATCTACTA CTCTGCTCAT GCTGAAAAAA GAAGAAATGG CTTAGCGATA ATTTGTGACAA AGAAAAATGC 739   |       |       |     |
| BovB_Plat-RTE-Ornithorhynchus  | -- ATCTACTA CTCTGCCCAT GCTGAAAAAA GAAGAAATGG CGTAGCGGTA ATTTGTGACAA AGAAAAATGC 723   |       |       |     |
| BovB_Ec-RTE-Equus_caballus     | -- GTGTTCTA CTCTGGAAAT GACAAAACCA GAAGAAACAG AGTGGCTCTA ATACTGAGGC AAGATGTAGC 493    |       |       |     |
| BovB_Cg-RTE-Christinus         | -----CCA CTTC-----T GACTAACACA GAAGATACAG AGTTGTTCTA ATACTGAGGC AAGATTTAGC 130       |       |       |     |
| BovB_Bh-RTE-Bothriocroton_hydr | ---                                                                                  | ---   | ---   | --- |
| BovB_MI-RTE-Gehyra_variegata   | ---                                                                                  | ---   | ---   | --- |
| Sly-rnd1_family284-LINE/RTEBov | ---                                                                                  | ---   | ---   | --- |
| Sly-rnd5_family2019-LINE/RTEBo | ---                                                                                  | ---   | ---   | --- |
| Sly-rnd3_family322-LINE/RTEBov | ---                                                                                  | ---   | ---   | --- |
| Sly-rnd5_family1698-LINE/RTEBo | ---                                                                                  | ---   | ---   | --- |
| Sly-rnd1_family795-LINE/RTEBov | ---                                                                                  | ---   | ---   | --- |
| Stu-rnd-5_family-3162_LINE_RTE | CTCTCTCTCC TCTAGTCTAC TAGCAGCTCA GGCGAAAGCTG CGAACGGGCG CCGGCCAGCGA ACAGCAGCGA 139   |       |       |     |
| Sly-rnd6_family1960-LINE/RTEBo | ---                                                                                  | ---   | ---   | --- |
| Stu-rnd-5_family-2493_LINE_RTE | ---                                                                                  | ---   | ---   | --- |
| Sly-rnd5_family447-LINE/RTEBov | ---                                                                                  | ---   | ---   | --- |
| Stu-rnd-6_family-2093_LINE_RTE | ---                                                                                  | ---   | ---   | --- |
| Consensus                      | ---                                                                                  | ---   | ---   | --- |

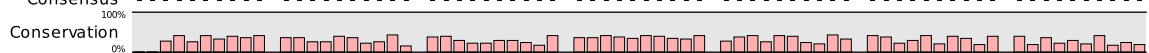

|                                | 1,340                                                                             | 1,360 | 1,380 | 1,400 |
|--------------------------------|-----------------------------------------------------------------------------------|-------|-------|-------|
| Stu-rnd-1_family-417_LINE_RTE  | -----                                                                             | ----- | ----- | ----- |
| Sly-rnd1_family377-LINE/RTEBov | -----                                                                             | ----- | ----- | ----- |
| Stu-rnd-1_family-489_LINE_RTE  | -----                                                                             | ----- | ----- | ----- |
| Stu-rnd-1_family-607_LINE_RTE  | -----                                                                             | ----- | ----- | ----- |
| Stu-rnd-1_family-645_LINE_RTE  | -----                                                                             | ----- | ----- | ----- |
| Sly-rnd4_family81-LINE/RTEBovB | -----                                                                             | ----- | ----- | ----- |
| Stu-rnd-6_family-408_LINE_RTE  | -----                                                                             | ----- | ----- | ----- |
| Stu-rnd-1_family-351_LINE_RTE  | -----                                                                             | ----- | ----- | ----- |
| Stu-rnd-1_family-382_LINE_RTE  | -----                                                                             | ----- | ----- | ----- |
| Sly-rnd6_family746-LINE/RTEBov | -----                                                                             | ----- | ----- | ----- |
| Stu-rnd-5_family-325_LINE_RTE  | -----                                                                             | ----- | ----- | ----- |
| Sly-rnd4_family509-LINE/RTEBov | -----                                                                             | ----- | ----- | ----- |
| Stu-rnd-1_family-513_LINE_RTE  | -----                                                                             | ----- | ----- | ----- |
| Sly-rnd5_family1442-LINE/RTEBo | -----                                                                             | ----- | ----- | ----- |
| BovB_GI-RTE-Gehyra_lazelli     | AAAGGCAGTA ATGGGATACA ATC-TCAAAA ACG-ACAGAA TGATCTCTGT CCGGAATCCA AGGCAAACCA 801  |       |       |       |
| BovB_Gv-RTE-Gehyra_variegata   | AAAGGCAGTA ATGGGATACA ATC-TCAAAA ACG-ACAGAA TGATCTCTAT CC-GAATCCA AGGCAAACCA 732  |       |       |       |
| BovB_PMo-RTE-Python_molurus    | AAAGGCAGTA ATGGGGTACA ACC-TCAAAA ACG-ACAGAA TGATCTCAGT GC-GTATCCA AGGCAAACCA 674  |       |       |       |
| BovB_Oa-RTE-Ovis_aries         | AAATGCAGTA CTTGGGTGCA ATC-TCAAAA ATG-ACAGAA TGATCTCTGT TC-ATTTCCA AGGCAAACCA 698  |       |       |       |
| BovB-RTE-Bos_taurus            | AAATGCAGTA CTTGGATGCA ATC-TCAAAA ACG-ACAGAA TGATCTCTGT TC-GTTTCCA AGGCAAACCA 1296 |       |       |       |
| BovB_Me-RTE-Macropus_eugenii   | AAAAGCAGTA TGGGGGTATA ATC-TCAAAA AGG-ATAGAA TCCTATCAGT CT-GAATACA AGACAAACTA 542  |       |       |       |
| BovB_Ano-RTE-Amphibolurus_norr | AAAAGCTGTA ATGGGATACA ATC-TCAAAA ATG-ATAGAA TGATGTCAAT AC-GAATCCA AGGCAGACCT 745  |       |       |       |
| BovB_Gd-RTE-Eremiascincus_doug | AACAGCAGTA ATGGGGTATA ACC-TCAAAA ATG-ATAGAA TGATTTCAAT TC-GGATCCA AGGCAAACCT 329  |       |       |       |
| BovB_Er-RTE-Eremiascincus_rich | AACAGCAGTA CTGGGGTATA ACC-TCAAAA ATG-ATAGAA TGATTTCAAT TC-GGATCCA AGGCAAACCT 868  |       |       |       |
| BovB_Ca-RTE-Ctenotus_atlas     | AGCAGCAGTG TTGGGGTATA ACC-TCAAAA ATG-ATAGAA TGATTTCAAT TC-GGATCCA AGGCAAACCT 860  |       |       |       |
| BovB_Es-RTE-Egernia_stokesii   | AAAAACAGTA GGGGGATACA ATC-TCAAAA ACG-ACAGAA TGATTTCAAT TC-AAATTC A AGGCAAACCT 691 |       |       |       |
| BovB_Tr-RTE-Tiliqua_rugosa     | AAAAGCAGTA CTGGGGTACA ATC-TCAAAA ACA-ACAGAA TGATTTCAAT TC-AAATTC A AGGCAAACCT 706 |       |       |       |
| BovB_ALI-RTE-Amblyomma_limbatu | AAGAATAATA TTGTGATACA ATC-TCCAAA ATG-ACATAA TGATATCAGT TT-GAATTC A ATGCAAACCA 802 |       |       |       |
| BovB_Hs-RTE-Hydrophis_spiralis | -----                                                                             | ----- | ----- | ----- |
| BovB_VA-RTE-Vipera_ammodytes   | AAAAGCAATA CTGGGATACA ATC-CCCAAA ATG-ACAGAA TGATCTCAGT TC-GAATCCA AGGCAAACCA 666  |       |       |       |
| BovB_ACo-RTE-Agkistrodon_conto | AAAAGCAATA CTGGGATACA ATC-CCCAAA ATG-ACAGAA TGATCTCAGT GC-GAATCCA AGGCAAACCA 668  |       |       |       |
| BovB_Pg-RTE-Perameles_gunnii   | -----                                                                             | ----- | ----- | ----- |
| BovB_lo-RTE-Isodon_obesulus    | -----                                                                             | ----- | ----- | ----- |
| BovB_Bp-RTE-Burramys_parvulus  | -----                                                                             | ----- | ----- | ----- |
| BovB_Pb-RTE-Petaurus_breviceps | -----                                                                             | ----- | ----- | ----- |
| BovB_Ma-RTE-Macropus_antilopin | AAAGAATCCC TTAGAAGAAA TGG-AACAGT CAA-CACAGT CAATAAAAGG GTAAGAAAAG CAATACCAGG 737  |       |       |       |
| BovB_Af-RTE-Antechinus_flavipe | -----                                                                             | ----- | ----- | ----- |
| BovB_Ac-RTE-Anolis_carolinensi | GAAAGCAGTG ATTGGATACA ACC-CAAAAA ATG-ATAGAA TGATCTCAAT TC-GAGTTCA AGGCAAGCCA 630  |       |       |       |
| BovB_BM-RTE-Bombyx_mori        | CCAATACGTC CTCGGATACC ATC-CCATAT CTG-ATAGAA TACTAACTTT GAAACTCAAC ACAAACC-A 487   |       |       |       |
| BovB_Dr-RTE-Christinus         | TAAAGCTGTT CAAAGCTTCA ATG-CTATAA ATG-GCCGAG TCATATCCAT CCGTTTCCAT GGAAGCC-T 537   |       |       |       |
| BovB_La-RTE-Loxodonta_africana | AAGATCTATC CTGAAGTACA ACG-CTGTCA GTG-ATAGGA TAATATCCAT ACGCCTACAA GGAAGACC-A 662  |       |       |       |
| BovB_Pc-RTE-Procavia_capensis  | AAGATCTGTC CTGAAGTACA ATG-CTGTCA GTG-ATAGGA TAATATCCAT ATGCTTACAA GGAAGGCC-A 664  |       |       |       |
| BovB_Et-RTE-Christinus         | AAAATACATC ATGAAATACA ATG-CTATCT AC--ATCAGA TGATATCTAT ACACTTTCAA GGAATCCCA 514   |       |       |       |
| BovB_Ta-RTE-Tachyglossus_acule | TAAAGCAGTT ATCGGATATA ATG-CTGTCA ATG-ACCAAT TGATATCTGT TAGATTCAGA GGAACC-A 806    |       |       |       |
| BovB_Plat-RTE-Ornithorhynchus  | TAAAGCAGTT ATCGGATATA ATG-CTGTCA ATG-ACCGAT TGATATCTGT TAGATTCAGA GGAACC-A 790    |       |       |       |
| BovB_Ec-RTE-Equus_caballus     | ACAGGCAGTT AGGGCTCTA ATG-CAAGGT CTG-ACCAAA TAATATCAAT CAGACTTC-T GGGAAAACCT 560   |       |       |       |
| BovB_Cg-RTE-Christinus         | ACAAGCAATC AGGACTATA ATGACAAAGT CTGACCAAA TAATTTCAAT CAGACTTCAT TGAAAACCT 200     |       |       |       |
| BovB_Bh-RTE-Bothriocroton_hydr | -----                                                                             | ----- | ----- | ----- |
| BovB_MI-RTE-Gehyra_variegata   | -----                                                                             | ----- | ----- | ----- |
| Sly-rnd1_family284-LINE/RTEBov | -----                                                                             | ----- | ----- | ----- |
| Sly-rnd5_family2019-LINE/RTEBo | -----                                                                             | ----- | ----- | ----- |
| Sly-rnd3_family322-LINE/RTEBov | -----                                                                             | ----- | ----- | ----- |
| Sly-rnd5_family1698-LINE/RTEBo | -----                                                                             | ----- | ----- | ----- |
| Sly-rnd1_family795-LINE/RTEBov | -----                                                                             | ----- | ----- | ----- |
| Stu-rnd-5_family-3162_LINE_RTE | AAACCAGTCG GCAACCGGAC GTCGCTCTG ATCTGGTATT CCCGCCCCAA ATCGAAGGTT GCGCCGGCCA 209   |       |       |       |
| Sly-rnd6_family1960-LINE/RTEBo | -----                                                                             | ----- | ----- | ----- |
| Stu-rnd-5_family-2493_LINE_RTE | -----                                                                             | ----- | ----- | ----- |
| Sly-rnd5_family447-LINE/RTEBov | -----                                                                             | ----- | ----- | ----- |
| Stu-rnd-6_family-2093_LINE_RTE | -----                                                                             | ----- | ----- | ----- |
| Consensus                      | -----                                                                             | ----- | ----- | ----- |

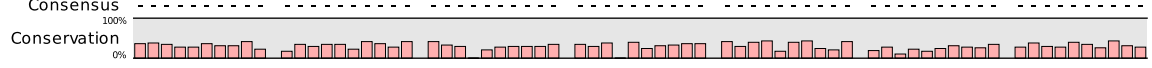



|                                | 1,420                                                                                                     | 1,440 | 1,460 |       |       |       |       |
|--------------------------------|-----------------------------------------------------------------------------------------------------------|-------|-------|-------|-------|-------|-------|
| Stu-rnd-1_family417_LINE_RTE   | -----                                                                                                     | ----- | ----- | ----- | ----- | ----- | ----- |
| Sly-rnd1_family377-LINE/RTEBov | -----                                                                                                     | ----- | ----- | ----- | ----- | ----- | ----- |
| Stu-rnd-1_family489_LINE_RTE   | -----                                                                                                     | ----- | ----- | ----- | ----- | ----- | ----- |
| Stu-rnd-1_family607_LINE_RTE   | -----                                                                                                     | ----- | ----- | ----- | ----- | ----- | ----- |
| Stu-rnd-1_family645_LINE_RTE   | -----                                                                                                     | ----- | ----- | ----- | ----- | ----- | ----- |
| Sly-rnd4_family81-LINE/RTEBovB | -----                                                                                                     | ----- | ----- | ----- | ----- | ----- | ----- |
| Stu-rnd-6_family408_LINE_RTE   | -----                                                                                                     | ----- | ----- | ----- | ----- | ----- | ----- |
| Stu-rnd-1_family351_LINE_RTE   | -----                                                                                                     | ----- | ----- | ----- | ----- | ----- | ----- |
| Stu-rnd-1_family382_LINE_RTE   | -----                                                                                                     | ----- | ----- | ----- | ----- | ----- | ----- |
| Sly-rnd6_family746-LINE/RTEBov | -----                                                                                                     | ----- | ----- | ----- | ----- | ----- | ----- |
| Stu-rnd-5_family325_LINE_RTE   | -----                                                                                                     | ----- | ----- | ----- | ----- | ----- | ----- |
| Sly-rnd4_family509-LINE/RTEBov | -----                                                                                                     | ----- | ----- | ----- | ----- | ----- | ----- |
| Stu-rnd-1_family513_LINE_RTE   | -----                                                                                                     | ----- | ----- | ----- | ----- | ----- | ----- |
| Sly-rnd5_family1442-LINE/RTEBo | -----                                                                                                     | ----- | ----- | ----- | ----- | ----- | ----- |
| BovB_GI-RTE-Gehyra_lazelli     | TTCAA <b>ACC</b> AT CACAGTAA <b>A</b> T CCAAGTCTAT CGCCCC-----AAC CACTGACGCA GAAGAGGTTG 860               |       |       |       |       |       |       |
| BovB_Gv-RTE-Gehyra_variegata   | TTCAA--CAT CACAGTAA-T CCAAGTCTAT -GCCCC-----AAC CACTGACGCA GAAGAAGTTG 787                                 |       |       |       |       |       |       |
| BovB_PMo-RTE-Python_molurus    | TTCAA--CAT CACAGTCA-T CCAAGTCTAT -GCCCC-----AAC CACTGATGCT GAAGAAGCTG 729                                 |       |       |       |       |       |       |
| BovB_Oa-RTE-Ovis_aries         | TTCAA--CAT CACAGTAA-T CCAAGTCTAT -GCCCC-----AAC CACTAATGCT GAAGAAGCTG 753                                 |       |       |       |       |       |       |
| BovB-RTE-Bos_taurus            | TTCAA--TAT CACAGTAA-T CCAAGTCTAT -GCCCC-----AAC CAGTAACGCT GAAGAAGCTG 1351                                |       |       |       |       |       |       |
| BovB_Me-RTE-Macropus_eugenii   | TTCAA--CAT CACAATAA-T AAAAA <b>T</b> CTAT -GTTCC <b>TGAT</b> AGTCTATATT CATTGATGTA AAAGAGGTC <b>A</b> 608 |       |       |       |       |       |       |
| BovB_Ano-RTE-Amphibolurus_norr | TTCAA--CAT CACAATAA-T CCAAGTTTAT -GCACC-----AAC CACCATTGCT GAGGAGACTG 800                                 |       |       |       |       |       |       |
| BovB_Gd-RTE-Eremiascincus_doug | TTCAA--CAT CACAATAG-T CCAAGTCTAT -GCCCCC-----AAC CACTGGGGCT GAAGAGGAAG 385                                |       |       |       |       |       |       |
| BovB_Er-RTE-Eremiascincus_rich | TTCAA--CAT CACAATAG-T CCAAGTCTAT -GCCCC-----AAC CACTGGGGCT GAAGAGGAAG 923                                 |       |       |       |       |       |       |
| BovB_Ca-RTE-Ctenotus_atlas     | TTCAA--CAT CACAGTAA-T CCAAGTCTAT -GCCCC-----AAC CACTGATGCT GAAGAGGAAG 915                                 |       |       |       |       |       |       |
| BovB_Es-RTE-Egernia_stokesii   | TTCAA--CCT CACAGTAA-T TCAAATCTAT -GCTCC-----AAC CACTGACACT GAAGAGGATG 746                                 |       |       |       |       |       |       |
| BovB_Tr-RTE-Tiliqua_rugosa     | TTTAA--CCT CACAGTAA-T TCAAGTCTAT -GCTCC-----AAC CACTGACACT GAAGAGGATG 761                                 |       |       |       |       |       |       |
| BovB_ALI-RTE-Amblyomma_limbatu | TTCAA--CAT ATCAATAG-T CCAAGTCTAT GACTCC-----AAC CACTGGTGCT GAAGAGGCTG 858                                 |       |       |       |       |       |       |
| BovB_Hs-RTE-Hydrophis_spiralis | -----                                                                                                     | ----- | ----- | ----- | ----- | ----- | ----- |
| BovB_VA-RTE-Vipera_ammodytes   | TTCAA--TAT CACAGTAG-T CCAAGTCTAT G-CCCC-----AAC CACCAGTGCT GAAGAGGATG 721                                 |       |       |       |       |       |       |
| BovB_ACo-RTE-Agkistrodon_conto | TTCAA--TAT CACAGTAG-T CCAAGTCTAT G-CCCC-----AAC CACTGGTGCT GAAGAGGATG 723                                 |       |       |       |       |       |       |
| BovB_Pg-RTE-Perameles_gunnii   | -----                                                                                                     | ----- | ----- | ----- | ----- | ----- | ----- |
| BovB_lo-RTE-Isodon_obesulus    | -----                                                                                                     | ----- | ----- | ----- | ----- | ----- | ----- |
| BovB_Bp-RTE-Burramys_parvulus  | -----                                                                                                     | ----- | ----- | ----- | ----- | ----- | ----- |
| BovB_Pb-RTE-Petaurus_breviceps | -----                                                                                                     | ----- | ----- | ----- | ----- | ----- | ----- |
| BovB_Ma-RTE-Macropus_antilopin | ATATAATCTC AAAAAAGACA GAATGAGATC TGTTCAAATC CAAGGCAAAC CATTCAACAT CACAACAATA 807                          |       |       |       |       |       |       |
| BovB_Af-RTE-Antechinus_flavipe | -----                                                                                                     | ----- | ----- | ----- | ----- | ----- | ----- |
| BovB_Ac-RTE-Anolis_carolinensi | TTTAA--CAT CACAGTGA-T CCAAAATATAC -GCCCC-----AAC CACAGCTGCT GAAGAAGCAG 685                                |       |       |       |       |       |       |
| BovB_BM-RTE-Bombyx_mori        | TTCAT <b>AAC</b> --AAATGTCAT ACAAATATAT GCCCC-----AAC AGCCCAGGCC AAGTACGAGG 542                           |       |       |       |       |       |       |
| BovB_Dr-RTE-Christinus         | CGCTC <b>GCT</b> --CACTTTCCT GCAGGTATAC GGGCC-----TAC TACTGATGGC AAAGTAGAGG 592                           |       |       |       |       |       |       |
| BovB_La-RTE-Loxodonta_africana | GTTAAT <b>AC</b> --AACTATTAT TCAAATTTAC ACACC-----AAC CACTAAGGCC AAAGATGAAG 717                           |       |       |       |       |       |       |
| BovB_Pc-RTE-Procavia_capensis  | GTTAAT <b>AC</b> --GACTATTAT TCAAATTTAT GCACC-----AAC CACTAAGGCC AAAGATGAAG 719                           |       |       |       |       |       |       |
| BovB_Et-RTE-Christinus         | ATCAAT <b>TATTT</b> GAACTATTAT TCAAATTTAT GTACC-----AAC CACAAAAGCT AGTGATGAAG 572                         |       |       |       |       |       |       |
| BovB-Ta-RTE-Tachyglossus_acule | TTCAG <b>TAT</b> --GACAATACT TCAGGTATAC GCCCC-----AAC AACAAATGCA GAGCAAGAA- 860                           |       |       |       |       |       |       |
| BovB_Plat-RTE-Ornithorhynchus  | TTCAAT <b>AT</b> --GACAATACT TCAGGTGTAC GCCCC-----AAC AACAGATGCA GAGCAAGAA 845                            |       |       |       |       |       |       |
| BovB_Ec-RTE-Equus_caballus     | ATTAA <b>CAT</b> --AACCATCAT CCAAGTCTAT GCTCC-----AAC TACAGATGCT GAAGAAGATG 615                           |       |       |       |       |       |       |
| BovB_Cg-RTE-Christinus         | ATCA <b>ACAT</b> --AAAAATCAT TCAAGTTTAC ACCAC-----AAC TTCAGATGAT GAAGAGGAAG 255                           |       |       |       |       |       |       |
| BovB_Bh-RTE-Bothriocroton_hydr | -----                                                                                                     | ----- | ----- | ----- | ----- | ----- | ----- |
| BovB_MI-RTE-Gehyra_variegata   | -----                                                                                                     | ----- | ----- | ----- | ----- | ----- | ----- |
| Sly-rnd1_family284-LINE/RTEBov | -----                                                                                                     | ----- | ----- | ----- | ----- | ----- | ----- |
| Sly-rnd5_family2019-LINE/RTEBo | -----                                                                                                     | ----- | ----- | ----- | ----- | ----- | ----- |
| Sly-rnd3_family322-LINE/RTEBov | -----                                                                                                     | ----- | ----- | ----- | ----- | ----- | ----- |
| Sly-rnd5_family1698-LINE/RTEBo | -----                                                                                                     | ----- | ----- | ----- | ----- | ----- | ----- |
| Sly-rnd1_family795-LINE/RTEBov | -----                                                                                                     | ----- | ----- | ----- | ----- | ----- | ----- |
| Stu-rnd-5_family3162_LINE_RTE  | GAAGC <b>AGCGC</b> GAGGAACAGA CCCGACCGGC GAGCCTCTT CTCTCTCTCC TCCTAAGCTT CAGTGAGGAC 279                   |       |       |       |       |       |       |
| Sly-rnd6_family1960-LINE/RTEBo | -----                                                                                                     | ----- | ----- | ----- | ----- | ----- | ----- |
| Stu-rnd-5_family2493_LINE_RTE  | -----                                                                                                     | ----- | ----- | ----- | ----- | ----- | ----- |
| Sly-rnd5_family447-LINE/RTEBov | -----                                                                                                     | ----- | ----- | ----- | ----- | ----- | ----- |
| Stu-rnd-6_family2093_LINE_RTE  | -----                                                                                                     | ----- | ----- | ----- | ----- | ----- | ----- |
| Consensus                      | -----                                                                                                     | ----- | ----- | ----- | ----- | ----- | ----- |

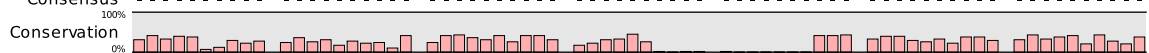

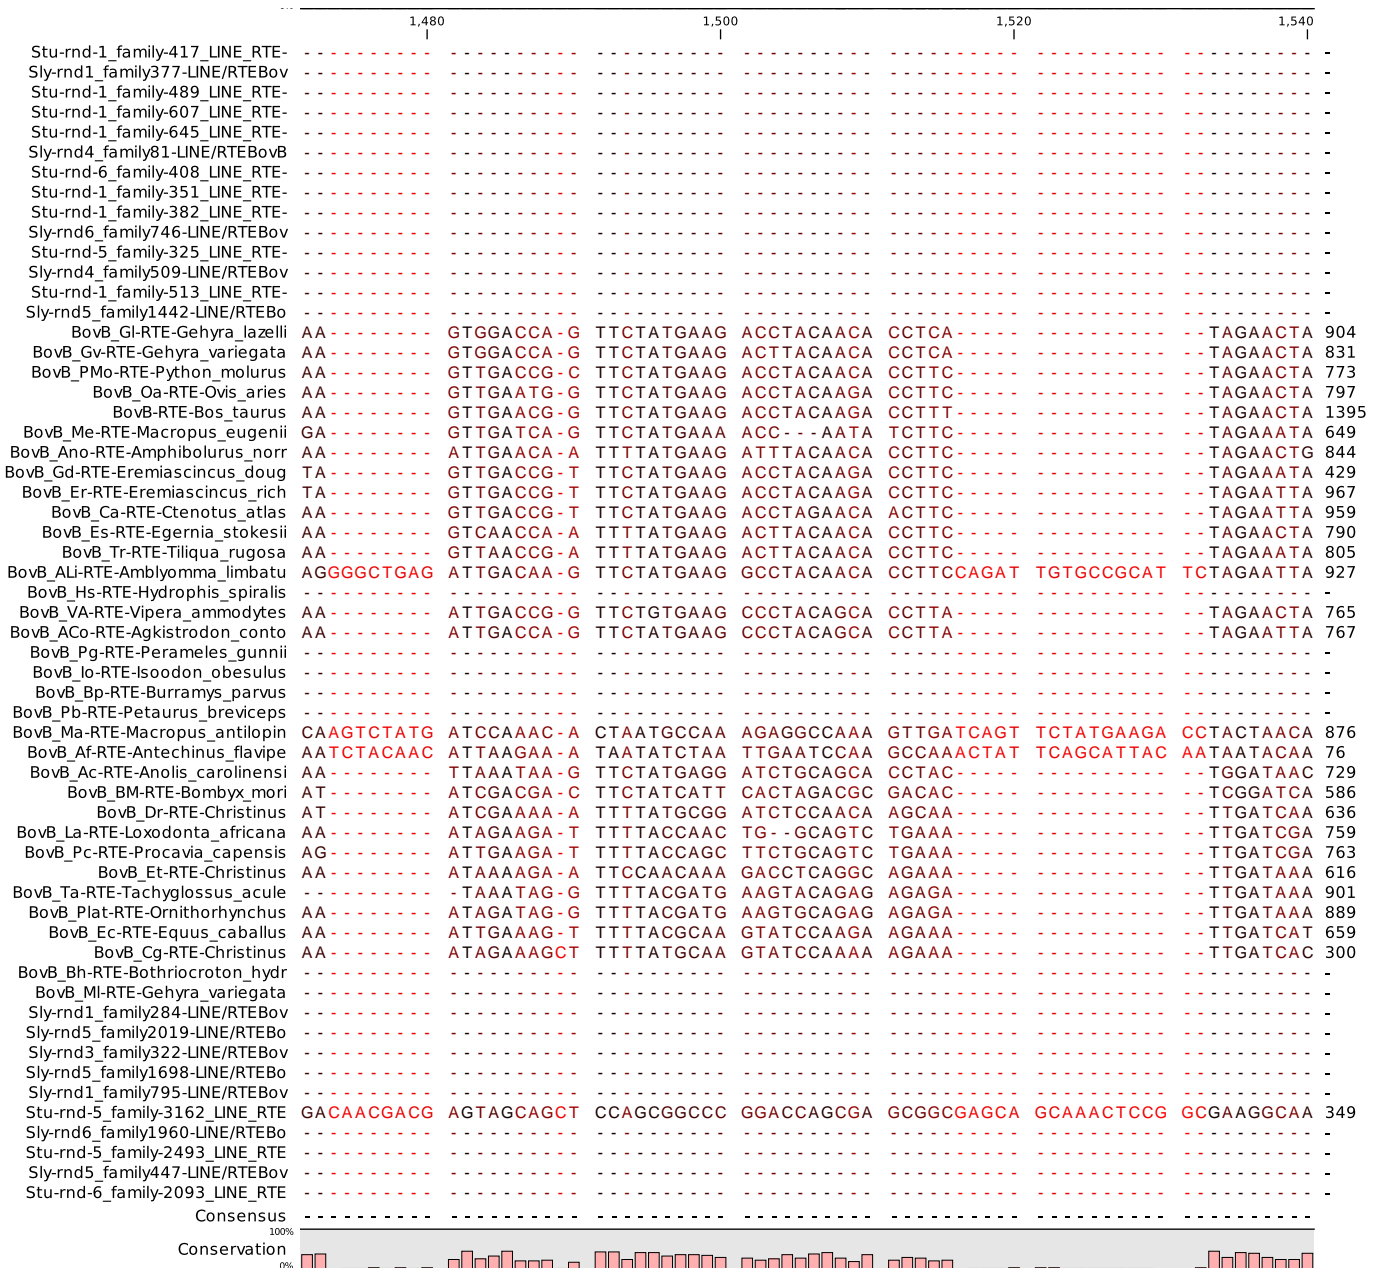

|                                | 1,560       |            | 1,580        |             | 1,600      |                            |                |
|--------------------------------|-------------|------------|--------------|-------------|------------|----------------------------|----------------|
| Stu-rnd-1_family-417_LINE_RTE  | -----       | -----      | -----        | -----       | -----      | -----                      |                |
| Sly-rnd1_family377-LINE/RTEBov | -----       | -----      | -----        | -----       | -----      | -----                      |                |
| Stu-rnd-1_family-489_LINE_RTE  | -----       | -----      | -----        | -----       | -----      | -----                      |                |
| Stu-rnd-1_family-607_LINE_RTE  | -----       | -----      | -----        | -----       | -----      | -----                      |                |
| Stu-rnd-1_family-645_LINE_RTE  | -----       | -----      | -----        | -----       | -----      | -----                      |                |
| Sly-rnd4_family81-LINE/RTEBovB | -----       | -----      | -----        | -----       | -----      | -----                      |                |
| Stu-rnd-6_family-408_LINE_RTE  | -----       | -----      | -----        | -----       | -----      | -----                      |                |
| Stu-rnd-1_family-351_LINE_RTE  | -----       | -----      | -----        | -----       | -----      | -----                      |                |
| Stu-rnd-1_family-382_LINE_RTE  | -----       | -----      | -----        | -----       | -----      | -----                      |                |
| Sly-rnd6_family746-LINE/RTEBov | -----       | -----      | -----        | -----       | -----      | -----                      |                |
| Stu-rnd-5_family-325_LINE_RTE  | -----       | -----      | -----        | -----       | -----      | -----                      |                |
| Sly-rnd4_family509-LINE/RTEBov | -----       | -----      | -----        | -----       | -----      | -----                      |                |
| Stu-rnd-1_family-513_LINE_RTE  | -----       | -----      | -----        | -----       | -----      | -----                      |                |
| Sly-rnd5_family1442-LINE/RTEBo | -----       | -----      | -----        | -----       | -----      | -----                      |                |
| BovB_GI-RTE-Gehyra_lazelli     | GCACCAAAAA  | A-AGATGTTT | TCATCATCCT   | AGGGGACTGG  | AATGCT-AAA | GTAAGGTAGT -CAAAAAGTA 971  |                |
| BovB_Gv-RTE-Gehyra_variegata   | GCACCAAAAA  | A-AGATGTTT | TCATCATCCT   | AGGGGACTGG  | AATGCT-AAA | GTA-GGTAGT -CAAAAAGTA 897  |                |
| BovB_PMo-RTE-Python_molurus    | GCACCAAAAA  | A-AGATGTCC | TTTTTCATCAT  | AGGGGACTGG  | AATGCT-AAA | GTA-GGAAGT -CAAGAGATA 839  |                |
| BovB_Oa-RTE-Ovis_aries         | GCACCAAAAA  | A-AGATGTCC | TTTTTCATCAT  | AGGGGACTGG  | AATGCA-AAA | GTA-GGAAGT -CAAGAGATA 863  |                |
| BovB-RTE-Bos_taurus            | GCACCAAAAA  | A-AGATGTCC | TTTTTCATTAT  | AGGGGACTGG  | AATGCA-AAA | GTA-GGAAGT -CAAGAACA 1461  |                |
| BovB_Me-RTE-Macropus_eugenii   | ACACTATAAA  | A-AAA-GTCA | CACTGTTTTT   | AGGAGATTGG  | AATGCT-AAA | CTA-GGAAAT -AAAAAGATA 714  |                |
| BovB_Ano-RTE-Amphibolurus_norr | ACACCAAAAGA | A-AGATGTTT | TTCTCATTCT   | AGGGGATTGG  | AATGCT-AAA | GTA-GGGAGT -CAAGAGATA 910  |                |
| BovB_Gd-RTE-Eremiascincus_doug | ACACCAAAAA  | ACGAATGTCC | TTTTTCATCAT  | AGGGGATTGG  | AATGCT-AAA | GTA-GGCAGT -CAAGAGGTA 496  |                |
| BovB_Er-RTE-Eremiascincus_rich | ACACCAAAAA  | A-AGATGTCC | TTCTCATTCT   | AGGGGATTGG  | AATGCT-AAA | GTA-GGCAGT -CAAGAGGTA 1033 |                |
| BovB_Ca-RTE-Ctenotus_atlas     | ACACCAAAAA  | A-AGATGTCC | TCCTCATCAT   | AGGGGATTGG  | AATGCT-AAA | GTA-GGCAGT -CAAGAGGTA 1025 |                |
| BovB_Es-RTE-Egernia_stokesii   | ACACCAAAAA  | A-AGACGTCC | TCCTTATTAC   | AGGGGATTGG  | AACACTTAAA | GTA-GGAAGT -CAAGAGGTA 857  |                |
| BovB_Tr-RTE-Tiliqua_rugosa     | ACACCAAAAA  | A-AGATGTCC | TCCTTATTAT   | AGGGGATTGG  | AATGCT-AAA | GTA-GGAAGT -CAAGAGGTA 871  |                |
| BovB_ALi-RTE-Amblyomma_limbatu | GCTCCAAAA   | A-TGATGTCC | TTATCATCAT   | GGGGGATTAG  | AATGCT-AAA | GTA-GGAAGC -CAAAAAGATA 993 |                |
| BovB_Hs-RTE-Hydrophis_spiralis | -----       | -----      | -----        | -----       | -----      | -----                      |                |
| BovB_VA-RTE-Vipera_ammodytes   | ACACCAAAAA  | A-TGATGTCC | TTATCATCAT   | GGGGGATTGG  | AATGCT-AAA | GTA-GGAAGC -CAAAAAGATA 831 |                |
| BovB_ACo-RTE-Agkistrodon_conto | ACACCAAAAA  | A-TGATGTCC | TTATCATCAT   | GGGGGATTGG  | AATGCT-AAA | GTA-GGAAGC -CAAAAAGATA 833 |                |
| BovB_Pg-RTE-Perameles_gunnii   | -----       | -----      | -----        | -----       | -----      | -----                      |                |
| BovB_lo-RTE-Isodon_obesulus    | -----       | -----      | -----        | -----       | -----      | -----                      |                |
| BovB_Bp-RTE-Burramys_parvulus  | -----       | -----      | -----        | -----       | -----      | -----                      |                |
| BovB_Pb-RTE-Petaurus_breviceps | -----       | -----      | -----        | -----       | -----      | -----                      |                |
| BovB_Ma-RTE-Macropus_antilopin | TCTTCTAGAA  | ATAACACAAA | AAAAAGATAT   | CACATTTCATC | ATAGAGGATT | GGA- - -ATG -CTAAAGAAA 941 |                |
| BovB_Af-RTE-Antechinus_flavipe | ATCTCCAGTC  | ACTGAGGCCA | AAGAGGCTTA   | AAATTGCTCA  | GTTTTATGAA | GAC- - -CTA -CAACAATT 141  |                |
| BovB_Ac-RTE-Anolis_carolinensi | ACACCAAAAA  | G-AGACATTA | TTCTAATTAC   | AGGAGATTGG  | AATGCT-AAA | GTG-GGCAGT -CAAATGACA 795  |                |
| BovB_BM-RTE-Bombyx_mori        | ATACCTAATC  | G-AGAGATAA | CCTTATTCC    | TGGGGACTGG  | AATGCAAAA  | TCGGTGAAC                  | GACAGCGGAT 655 |
| BovB_Dr-RTE-Christinus         | GCACCAACAA  | A-GGACACCA | TATATATTGG   | TGGGGATTTC  | AACGCAAAAG | TAGGG- - - -CTGATGAA 699   |                |
| BovB_La-RTE-Loxodonta_africana | ACATGCAATC  | A-AGATGCAC | TGATAATTAC   | TGGCGATTGG  | AATGCAAAA  | TTGAAACA - -AAAAAAA 825    |                |
| BovB_Pc-RTE-Procavia_capensis  | ACATGCAATC  | A-GGATGCAT | TGATAATTAC   | TGGTGACTGG  | AATGCAAAA  | TTGAAACA - -AAGAAGAA 829   |                |
| BovB_Et-RTE-Christinus         | AAATGCAATC  | A-AGATGCAT | TGA- - -TTAT | TGGTAATTGG  | AATGCAAAA  | TTG-AAACA - -AAGAGAA 678   |                |
| BovB-Ta-RTE-Tachyglossus_acule | AGCTGCAAGC  | A-AGATGTGT | TGATTATCAC   | TGGGGATTGG  | AATGCAAAA  | TTGGTAATG - -GAATGGAA 967  |                |
| BovB_Plat-RTE-Ornithorhynchus  | AGCTGCAAGC  | A-AGATGTGT | TGATTATCAC   | TGGGGATTGG  | AATGCAAAA  | TTGGTAATG - -GAATGGAA 955  |                |
| BovB_Ec-RTE-Equus_caballus     | ACACCAAAAC  | A-AGACATGC | TGATAATTAT   | AGTTGACTGG  | AACGCAAAAG | TAGGAAATA - -AAGTGGAA 725  |                |
| BovB_Cg-RTE-Christinus         | ACACCTAAAC  | A-AGATGTGC | TGATAATCAT   | AGTTGACTGG  | AATGCAAAA  | TAGGAAATA - -AAGTAGAA 366  |                |
| BovB_Bh-RTE-Bothriocroton_hydr | -----       | -----      | -----        | -----       | -----      | -----                      |                |
| BovB_MI-RTE-Gehyra_variegata   | -----       | -----      | -----        | -----       | -----      | -----                      |                |
| Sly-rnd1_family284-LINE/RTEBov | -----       | -----      | -----        | -----       | -----      | -----                      |                |
| Sly-rnd5_family2019-LINE/RTEBo | -----       | -----      | -----        | -----       | -----      | -----                      |                |
| Sly-rnd3_family322-LINE/RTEBov | -----       | -----      | -----        | -----       | -----      | -----                      |                |
| Sly-rnd5_family1698-LINE/RTEBo | -----       | -----      | -----        | -----       | -----      | -----                      |                |
| Sly-rnd1_family795-LINE/RTEBov | -----       | -----      | -----        | -----       | -----      | -----                      |                |
| Stu-rnd-5_family-3162_LINE_RTE | GAGCGTTTTT  | CAGCTTCTCC | GGCGAACTCA   | TCTATCTTCT  | CCGGCGACCA | GCCCGAAGA GAGACGGCAG 419   |                |
| Sly-rnd6_family1960-LINE/RTEBo | -----       | -----      | -----        | -----       | -----      | -----                      |                |
| Stu-rnd-5_family-2493_LINE_RTE | -----       | -----      | -----        | -----       | -----      | -----                      |                |
| Sly-rnd5_family447-LINE/RTEBov | -----       | -----      | -----        | -----       | -----      | -----                      |                |
| Stu-rnd-6_family-2093_LINE_RTE | -----       | -----      | -----        | -----       | -----      | -----                      |                |
| Consensus                      | -----       | -----      | -----        | -----       | -----      | -----                      |                |

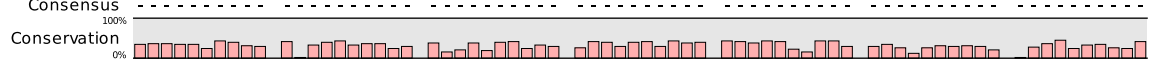

|                                | 1,620       | 1,640      | 1,660        | 1,680                                               |
|--------------------------------|-------------|------------|--------------|-----------------------------------------------------|
| Stu-rnd-1_family-417_LINE_RTE  | -----       | -----      | -----        | -----                                               |
| Sly-rnd1_family377-LINE/RTEBov | -----       | -----      | -----        | -----                                               |
| Stu-rnd-1_family-489_LINE_RTE  | -----       | -----      | -----        | -----                                               |
| Stu-rnd-1_family-607_LINE_RTE  | -----       | -----      | -----        | -----                                               |
| Stu-rnd-1_family-645_LINE_RTE  | -----       | -----      | -----        | -----                                               |
| Sly-rnd4_family81-LINE/RTEBovB | -----       | -----      | -----        | -----                                               |
| Stu-rnd-6_family-408_LINE_RTE  | -----       | -----      | -----        | -----                                               |
| Stu-rnd-1_family-351_LINE_RTE  | -----       | -----      | -----        | -----                                               |
| Stu-rnd-1_family-382_LINE_RTE  | -----       | -----      | -----        | -----                                               |
| Sly-rnd6_family746-LINE/RTEBov | -----       | -----      | -----        | -----                                               |
| Stu-rnd-5_family-325_LINE_RTE  | -----       | -----      | -----        | -----                                               |
| Sly-rnd4_family509-LINE/RTEBov | -----       | -----      | -----        | -----                                               |
| Stu-rnd-1_family-513_LINE_RTE  | -----       | -----      | -----        | -----                                               |
| Sly-rnd5_family1442-LINE/RTEBo | -----       | -----      | -----        | -----                                               |
| BovB_GI-RTE-Gehyra_lazelli     | ACTGGGATA   | -----AC    | GGGCAAGTTT   | TGGCCTTGA GAACAAAATG AAGCTGGGCA AAGGCTAACA 1032     |
| BovB_Gv-RTE-Gehyra_variegata   | GCTGGGATA   | -----AC    | GGGCAAGTTT   | -GGCCTTGA GAACAAAATG AAGCTGGGCA AAGGCTAACA 957      |
| BovB_PMo-RTE-Python_molurus    | ATCGGAATA   | -----AC    | AGGCAAGTTT   | -GGCCTTGA GTACAAAATG AAGCAGGGCA AAGGCTAATA 899      |
| BovB_Oa-RTE-Ovis_aries         | CCTGGAGTA   | -----AC    | AGGCAAAATTT  | -GGCCTTGA GTACAAAATG AAGCAGGGCA AAGGCTAACA 923      |
| BovB-RTE-Bos_taurus            | CCTGGAGTA   | -----AC    | AGGCAAAATTT  | -GGCCTTGA ATACGGAATG AAGCAGGGCA AAGACTAATA 1521     |
| BovB_Me-RTE-Macropus_eugenii   | ATTGGAATA   | -----AC    | AGCCAAGTTT   | -GGCCTTGA ATACAAAATG AAGCAAGG-A GAAGCCAATA 773      |
| BovB_Ano-RTE-Amphibolurus_norr | AAAGGAATA   | -----AC    | AGGGAAGTTT   | -GGCCTTGA GTTCAAAAACG AAGCAGGGCA AAGGCTAATA 970     |
| BovB_Gd-RTE-Eremiascincus_doug | ATAGGAATA   | -----AC    | AGGAAAGTTT   | -GGTCTTGA ACACAAAATG AAGCAGGGCA AAGACTGATA 556      |
| BovB_Er-RTE-Eremiascincus_rich | ATAGGAATA   | -----AC    | AGGCAAGTTT   | -GGTCTTGA GTACAAAATG AAGCAGGGCA AAGACTGATA 1093     |
| BovB_Ca-RTE-Ctenotus_atlas     | GTAGGAATT   | -----AC    | AGGCAAGTTT   | -GGTCTTGA GTACAAAATG AAGCAGGGCA AAGACTGATA 1085     |
| BovB_Es-RTE-Egernia_stokesii   | ACAAGAATA   | -----AC    | AAGCAAGTTT   | -GACCTTGA ACACAAAATG AAGCAGGACA AAGGCTAATA 917      |
| BovB_Tr-RTE-Tiliqua_rugosa     | ACAAGAATA   | -----AC    | AGGCAAGTTT   | -GGCCTTGA ATACAAAATG AAGCAGGGCA AAGGCTAATA 931      |
| BovB_ALi-RTE-Amblyomma_limbatu | ACCGGAATA   | -----AC    | AGGCAAGTTT   | -GGCCTTGGC GTACAAAATG AAGCAGGGCA CAGGCTGGTA 1053    |
| BovB_Hs-RTE-Hydrophis_spiralis | -----       | -----      | -----        | -----                                               |
| BovB_VA-RTE-Vipera_ammodytes   | ACCAGAATA   | -----AC    | AGGCAAGTTT   | -GGCCTTGA GTACAAAATG AAGCAGGGCA CAGGCTGATA 891      |
| BovB_ACo-RTE-Agkistrodon_conto | AC - GGAATA | -----AC    | AGGCAAGTTT   | -GGCCTTGA GTACAAAATG AAGCAGGGCA CAGGCTGATA 892      |
| BovB_Pg-RTE-Perameles_gunnii   | -----       | -----      | -----        | -----                                               |
| BovB_lo-RTE-Isodon_obesulus    | -----       | -----      | -----        | -----                                               |
| BovB_Bp-RTE-Burramys_parvulus  | -----       | -----      | -----        | -----                                               |
| BovB_Pb-RTE-Petaurus_breviceps | -----       | -----      | -----        | -----                                               |
| BovB_Ma-RTE-Macropus_antilopin | GAAACCAAA   | -----AG    | ATAACTGGAA   | -TAACAGGCA AATTTGGCCT TGGAAATAAAA AATGAAACAA 1001   |
| BovB_Af-RTE-Antechinus_flavipe | TTAGAAATA   | -----AC    | ACCAAAGAAA   | -AGATTTCAT ATTGATCATA GGGTATGGAA ATACTTAGA 201      |
| BovB_Ac-RTE-Anolis_carolinensi | ACCAGGATC   | -----AC    | AGGCAAGCAT   | -GGTCTGGGA CAACAAAATG AAGCAGGACG TAGGCTGATA 855     |
| BovB_BM-RTE-Bombyx_mori        | GGACACATAA  | GACGCACTGT | AGGAAATTTT   | -GGCTTGGGC AAACGAAAATG ACCGTGGAGA ACGATTTTTA 724    |
| BovB_Dr-RTE-Christinus         | GAGCAAAATG  | -----ATCAT | AGGCAATTTT   | -GGTTTAGGG GAACGGAACG AGGCTGGTGA CCGCTTGATC 762     |
| BovB_La-RTE-Loxodonta_africana | GGATT -GTA  | -----GT    | TGGAAAATAT   | -GGCCTTGGT GATAGAAAACA ATGCCGGAGA TCAAAATGATA 884   |
| BovB_Pc-RTE-Procavia_capensis  | GGATCAGTA   | -----GT    | TGGAAAATAC   | -GGCCTTGGT GATAGAAAATA ATGCCGGAGA TTGCATGATA 889    |
| BovB_Et-RTE-Christinus         | AGAACAAATA  | -----GT    | CAGA - - - - | - - - CTTGGT CACAGAAAATA AAGCTGGAGA TCACATGACA 729  |
| BovB_Ta-RTE-Tachyglossus_acule | ATGAAGGTT   | -----GT    | TGGAAAATAT   | -GGCCTTGGGA AATCAGAAATC AAGCCAGGGA CCGACTTA -T 1026 |
| BovB_Plat-RTE-Ornithorhynchus  | ATGAAGGTT   | -----GT    | TGGAAAATAT   | -GGCCTTGGGA AATCAGAAATC AAGCCAGGGA CCGACTTACT 1015  |
| BovB_Ec-RTE-Equus_caballus     | TCAAAACATC  | -----AT    | CGGAAAATTT   | -GGACTAGGG GTCAGAAAACA AAGCAGGAGA CCGGCTCATG 785    |
| BovB_Cg-RTE-Christinus         | TCAAAATATT  | -----GT    | AGGAAAAAAT   | AGGAATATGA GCATGAAAATG AAGCAGGAGA GCTACTCATA 427    |
| BovB_Bh-RTE-Bothriocroton_hydr | -----       | -----      | -----        | -----                                               |
| BovB_MI-RTE-Gehyra_variegata   | -----       | -----      | -----        | -----                                               |
| Sly-rnd1_family284-LINE/RTEBov | -----       | -----      | -----        | -----                                               |
| Sly-rnd5_family2019-LINE/RTEBo | -----       | -----      | -----        | -----                                               |
| Sly-rnd3_family322-LINE/RTEBov | -----       | -----      | -----        | -----                                               |
| Sly-rnd5_family1698-LINE/RTEBo | -----       | -----      | -----        | -----                                               |
| Sly-rnd1_family795-LINE/RTEBov | -----       | -----      | -----        | -----                                               |
| Stu-rnd-5_family-3162_LINE_RTE | TGCTACTGTT  | TGCCGCCGGA | GACCAACCAG   | ATCTGGCCGG AAATCANCCA GACCTGGCCC GAAAATTGCC 489     |
| Sly-rnd6_family1960-LINE/RTEBo | -----       | -----      | -----        | -----                                               |
| Stu-rnd-5_family-2493_LINE_RTE | -----       | -----      | -----        | -----                                               |
| Sly-rnd5_family447-LINE/RTEBov | -----       | -----      | -----        | -----                                               |
| Stu-rnd-6_family-2093_LINE_RTE | -----       | -----      | -----        | -----                                               |
| Consensus                      | -----       | -----      | -----        | -----                                               |

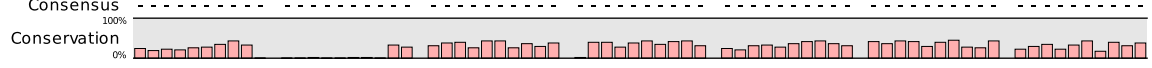

|                                | 1,700                                                                                   | 1,720 | 1,740 |       |
|--------------------------------|-----------------------------------------------------------------------------------------|-------|-------|-------|
| Stu-rnd-1_family-417_LINE_RTE  | -----                                                                                   | ----- | ----- | ----- |
| Sly-rnd1_family377-LINE/RTEBov | -----                                                                                   | ----- | ----- | ----- |
| Stu-rnd-1_family-489_LINE_RTE  | -----                                                                                   | ----- | ----- | ----- |
| Stu-rnd-1_family-607_LINE_RTE  | -----                                                                                   | ----- | ----- | ----- |
| Stu-rnd-1_family-645_LINE_RTE  | -----                                                                                   | ----- | ----- | ----- |
| Sly-rnd4_family81-LINE/RTEBovB | -----                                                                                   | ----- | ----- | ----- |
| Stu-rnd-6_family-408_LINE_RTE  | -----                                                                                   | ----- | ----- | ----- |
| Stu-rnd-1_family-351_LINE_RTE  | -----                                                                                   | ----- | ----- | ----- |
| Stu-rnd-1_family-382_LINE_RTE  | -----                                                                                   | ----- | ----- | ----- |
| Sly-rnd6_family746-LINE/RTEBov | -----                                                                                   | ----- | ----- | ----- |
| Stu-rnd-5_family-325_LINE_RTE  | -----                                                                                   | ----- | ----- | ----- |
| Sly-rnd4_family509-LINE/RTEBov | -----                                                                                   | ----- | ----- | ----- |
| Stu-rnd-1_family-513_LINE_RTE  | -----                                                                                   | ----- | ----- | ----- |
| Sly-rnd5_family1442-LINE/RTEBo | -----                                                                                   | ----- | ----- | ----- |
| BovB_GI-RTE-Gehyra_lazelli     | GAAGTTCTGT CAAGAAAACA TGCTGGTCAT AGCGAA - CAC CCTCTTTCAA CAACCTAAGA GGC - GACTCT 1100   |       |       |       |
| BovB_Gv-RTE-Gehyra_variegata   | GAA - TTCTGT CAAGAAAACA TGCTGGTCAT AGCGAA - CAC CCTCTTTCAA CAACCTAAGA GGC - GACTCT 1024 |       |       |       |
| BovB_PMo-RTE-Python_molurus    | GAG - TTCTGT CAAGAGAACA AGCTAGTCAT AGCAAA - CAC TCTTTTCCAA CAACACAAGA GAC - GACTCT 966  |       |       |       |
| BovB_Oa-RTE-Ovis_aries         | GAG - TTTTGC CAAGAGAACG CACTGGTCAT AGCAAA - CAC CCTCTTTCAA CAACACAAGA GAC - GACTCT 990  |       |       |       |
| BovB-RTE-Bos_taurus            | GAG - TTTTGC CAAGAAAATG CACTGGTCAT AGCAAA - CAC CCTCTTTCAA CAACACAAGA GAA - GACTCT 1588 |       |       |       |
| BovB_Me-RTE-Macropus_eugenii   | GAG - TTGTGT CAAGAAAATC TGCTGGTGT AAAAA - CAT TCTTTGTCAA CAACCGAAAA AAGTGACTCT 841      |       |       |       |
| BovB_Ano-RTE-Amphibolurus_norr | GAG - TTTTGT CAAGAGAACA AGCTGGTCAT AAAAA - CAC TCTTTTCCAA CAACACAAGA GGC - GACTCT 1037  |       |       |       |
| BovB_Gd-RTE-Eremiascincus_doug | GAG - TTCTGT CAGGAGAACA CATTAGTCAT AAAAA - CAC CCTTTTCCAG CAGCACAAC GGC - GACTGT 623    |       |       |       |
| BovB_Er-RTE-Eremiascincus_rich | GAG - TTCTGT CAGGAGAACA CATTAGTCAT AAAAA - CAC CCTTTTCCAG CAACACAAC GGC - GACTGT 1160   |       |       |       |
| BovB_Ca-RTE-Ctenotus_atlas     | GAG - TTTTGT CAGGAGAACG CATTAGTCAT AGCAAA - CAC CCTTTTCCAG CAACACAAC GGC - GACTGT 1152  |       |       |       |
| BovB_Es-RTE-Egernia_stokesii   | GAA - TTTTGT CAAGAGAACA CACTGGTCAT AGCAAA - CAC CCTTTTCCTA CAACCCAAGC AGC - GACTCT 984  |       |       |       |
| BovB_Tr-RTE-Tiliqua_rugosa     | GAG - TTTTGT CAAGAGAACA CACTGGTCAT AGCAAA - CAC CCTTTTCCTA CAACCCAAGC GAC - GACTCT 998  |       |       |       |
| BovB_ALi-RTE-Amblyomma_limbatu | GAA - TTTTGT CAAGAGAATA CGATGGTCAT AGCTAA - CAC TCTCTTTCAA CAACCTAAGA GAC - GACTCT 1120 |       |       |       |
| BovB_Hs-RTE-Hydrophis_spiralis | -----                                                                                   | ----- | ----- | ----- |
| BovB_VA-RTE-Vipera_ammodytes   | GAA - TTTTGT CAAGAGAATA CGATGGTCAT AGCAAA - CAC TCTTTTCCAA CAACCCAAGA GAC - GGCTGT 958  |       |       |       |
| BovB_ACo-RTE-Agkistrodon_conto | GAA - TTTTGT CAAGAGAATA CGATGGTCAT AGCAAA - CAC TCTTTTCCAA CAACCCAAGA GAC - GGCTCT 959  |       |       |       |
| BovB_Pg-RTE-Perameles_gunnii   | -----                                                                                   | ----- | ----- | ----- |
| BovB_lo-RTE-Isodon_obesulus    | -----                                                                                   | ----- | ----- | ----- |
| BovB_Bp-RTE-Burramys_parvulus  | -----                                                                                   | ----- | ----- | ----- |
| BovB_Pb-RTE-Petaurus_breviceps | -----                                                                                   | ----- | ----- | ----- |
| BovB_Ma-RTE-Macropus_antilopin | GGCAGAGACT GATAAAGTTT TGTCAGAAAA ACTCAC - TGG TCAGAGCAA CACTGTTTTT AAACAACCCA 1070      |       |       |       |
| BovB_Af-RTE-Antechinus_flavipe | GTAGGAAATC AAAACATAAT TAGAATAAAA AGCAAG - TTT GGCTTTAGGA TACAAAATGA AGCAGGACAG 270      |       |       |       |
| BovB_Ac-RTE-Anolis_carolinensi | GAA - TTTTGC CAGGAAAACCT CACTGTGCAC AAAAA - CAC CCTCTTTCAA CAACCTAAAA GAACGGCTTT 923    |       |       |       |
| BovB_BM-RTE-Bombyx_mori        | GAA - TTTTGC GTGGA AAAAG ATCTCAGCAT TCTCAA - TAC CTGCTTTCAA CATCATGCGA GGC - GACTGT 791 |       |       |       |
| BovB_Dr-RTE-Christinus         | CAG - TGCTGC CAAGAAAATC AATTAGTGAT TGTA AAA - CAC CTGGTTTGAA CAGCGAAGC GTC - GGTTAT 829 |       |       |       |
| BovB_La-RTE-Loxodonta_africana | GAA - TTTTGC AAGACCAACG ACTTCTTCAT TGCAAAAATAC CTTTTTTTAC CAACATAAAC GAC - GACTAT 952   |       |       |       |
| BovB_Pc-RTE-Procavia_capensis  | GAA - TTTTGC AAGACTAATG ACTTCTTCAT TGCAAA - TAC CTTTTTTTAC CAACACAAT GGT - GACTGT 956   |       |       |       |
| BovB_Et-RTE-Christinus         | AAA - TTTTGC AAAACCAACG ACTTGCTCAT AGAAAA - CAC CTTTTTCAA - AACACAAAA GGG - CACTAC 795  |       |       |       |
| BovB_Ta-RTE-Tachyglossus_acule | GAT - TTCTGT GAATCAAATG ACTTTTTTAT TGCCAA - CAC CTCTTTTATC CAACGTAAC GAC - GACTGT 1093  |       |       |       |
| BovB_Plat-RTE-Ornithorhynchus  | GAT - TTCTGT GAATCAAATG ACTTTTTTAT TGCCAA - CAC CTCTTTTATC CAACCTAAC GAC - GACTGT 1082  |       |       |       |
| BovB_Ec-RTE-Equus_caballus     | GAT - TTCTGT GAAGCCAACA ACTGTCCAT CGCAAA - TAC ATGCTTCAAG CAACCGAACA GAC - GACTGT 852   |       |       |       |
| BovB_Cg-RTE-Christinus         | GAA - TTCTGT GAAGACGACT ----- TAACCGTGAA CAC - GATTGT 465                               |       |       |       |
| BovB_Bh-RTE-Bothriocroton_hydr | -----                                                                                   | ----- | ----- | ----- |
| BovB_MI-RTE-Gehyra_variegata   | -----                                                                                   | ----- | ----- | ----- |
| Sly-rnd1_family284-LINE/RTEBov | -----                                                                                   | ----- | ----- | ----- |
| Sly-rnd5_family2019-LINE/RTEBo | -----                                                                                   | ----- | ----- | ----- |
| Sly-rnd3_family322-LINE/RTEBov | -----                                                                                   | ----- | ----- | ----- |
| Sly-rnd5_family1698-LINE/RTEBo | -----                                                                                   | ----- | ----- | ----- |
| Sly-rnd1_family795-LINE/RTEBov | -----                                                                                   | ----- | ----- | ----- |
| Stu-rnd-5_family-3162_LINE_RTE | CATTGACCAC CGAAGCCCTC CATCTTCACC GACTCAGGT CTATCTATCC TTTTCTCTCT CTTTTTCGCT 559         |       |       |       |
| Sly-rnd6_family1960-LINE/RTEBo | -----                                                                                   | ----- | ----- | ----- |
| Stu-rnd-5_family-2493_LINE_RTE | -----                                                                                   | ----- | ----- | ----- |
| Sly-rnd5_family447-LINE/RTEBov | -----                                                                                   | ----- | ----- | ----- |
| Stu-rnd-6_family-2093_LINE_RTE | -----                                                                                   | ----- | ----- | ----- |
| Consensus                      | -----                                                                                   | ----- | ----- | ----- |

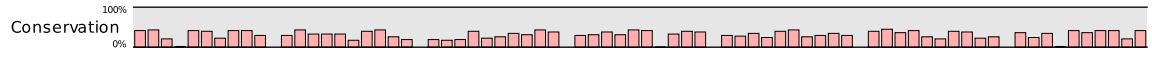



|                                | 1,760                                                                             | 1,780 | 1,800 | 1,820 |
|--------------------------------|-----------------------------------------------------------------------------------|-------|-------|-------|
| Stu-rnd-1_family-417_LINE_RTE  | -----                                                                             | ----- | ----- | ----- |
| Sly-rnd1_family377-LINE/RTEBov | -----                                                                             | ----- | ----- | ----- |
| Stu-rnd-1_family-489_LINE_RTE  | -----                                                                             | ----- | ----- | ----- |
| Stu-rnd-1_family-607_LINE_RTE  | -----                                                                             | ----- | ----- | ----- |
| Stu-rnd-1_family-645_LINE_RTE  | -----                                                                             | ----- | ----- | ----- |
| Sly-rnd4_family81-LINE/RTEBovB | -----                                                                             | ----- | ----- | ----- |
| Stu-rnd-6_family-408_LINE_RTE  | -----                                                                             | ----- | ----- | ----- |
| Stu-rnd-1_family-351_LINE_RTE  | -----                                                                             | ----- | ----- | ----- |
| Stu-rnd-1_family-382_LINE_RTE  | -----                                                                             | ----- | ----- | ----- |
| Sly-rnd6_family746-LINE/RTEBov | -----                                                                             | ----- | ----- | ----- |
| Stu-rnd-5_family-325_LINE_RTE  | -----                                                                             | ----- | ----- | ----- |
| Sly-rnd4_family509-LINE/RTEBov | -----                                                                             | ----- | ----- | ----- |
| Stu-rnd-1_family-513_LINE_RTE  | -----                                                                             | ----- | ----- | ----- |
| Sly-rnd5_family1442-LINE/RTEBo | -----                                                                             | ----- | ----- | ----- |
| BovB_GI-RTE-Gehyra_lazelli     | ACACATGGAC ATCACCAGAT --GGGCAACA CCGAAATCAG ATTGATTATA TCATCTG-CA GTCAAAGATG 1167 |       |       |       |
| BovB_Gv-RTE-Gehyra_variegata   | ACACATGGAC ATCACCAGAT --GGGCAACA CCGAAATCAG ATTGATTATA TCATCTG-CA GTCAAAGATG 1091 |       |       |       |
| BovB_PMo-RTE-Python_molurus    | ACACATGGAC ATCACCAGAT --GGTCAATA CCGAAACAG ATTGATTATA TACTTTG-CA GCCAAAGATG 1033  |       |       |       |
| BovB_Oa-RTE-Ovis_aries         | ACACATGGAC ATCACCAGAT --GGTCAATA CCGAAATCAG ATTGATTATA TTCTTTG-CA GCCAAAGATG 1057 |       |       |       |
| BovB-RTE-Bos_taurus            | ATACATGGAC ATCACCAGAT --GGTCAACA CCGAAATCAG ATTGATTATA TTCTTTG-CA GCCAAAGATG 1655 |       |       |       |
| BovB_Me-RTE-Macropus_eugenii   | ATACATGGAT GTCACCATAT AGGGTCAATA TTGAAATCAG ATTGAATATA TACTTTG-TA GTCAAAGGTG 910  |       |       |       |
| BovB_Ano-RTE-Amphibolurus_norr | ATACATGGAA ATCACCAGAT --GGGCAATA CCGAAATCAG ATTGATTATA TTCTCTG-CA GCCAAAGATG 1104 |       |       |       |
| BovB_Gd-RTE-Eremiascincus_doug | ACACATGGAC TTCACCAGAT --GGTCTACA TCGAAATCAG ATTGATTACA TTCTTTG-CA GCCAAAGGTG 690  |       |       |       |
| BovB_Er-RTE-Eremiascincus_rich | ACACATGGAC TTCACCAGAT --GGTCTACA CCGAAATCAG ATTGATTACA TTCTTTG-CA GCCAAAGGTG 1227 |       |       |       |
| BovB_Ca-RTE-Ctenotus_atlas     | ACACATGGAC TTCACCAGAT --GGTCTACA TCGAAATCAG ATTGATTACA TCCTTTG-CA GCCAAAGGTG 1219 |       |       |       |
| BovB_Es-RTE-Egernia_stokesii   | ACACATGGAA ATCACCAGAT --GATCTACA CTGAAATCAG ACTGAATATG TTCTCTG-CA GCCAAAGATG 1051 |       |       |       |
| BovB_Tr-RTE-Tiliqua_rugosa     | ACACATGGAC ATCACCAGAT --AGTCTACA CTGAAATCAG ATTGATTATA TTCTCTG-CA GCCAAAGATG 1065 |       |       |       |
| BovB_ALI-RTE-Amblyomma_limbatu | ACACATGGAC AGCACCTTAT --GGCCAACA CATAAATCAG ATTGACTATG TGATCTGACA GCCAAAGATG 1188 |       |       |       |
| BovB_Hs-RTE-Hydrophis_spiralis | -----                                                                             | ----- | ----- | ----- |
| BovB_VA-RTE-Vipera_ammodytes   | ACACATGGAC ATCACCAGAT --GGTCAATA CAGAAATCAG ATTGACTATG TGCTCTG-CA GCCAAAGATG 1025 |       |       |       |
| BovB_ACo-RTE-Agkistrodon_conto | ACACATGGAC ATCACCAGAC --GGTCAACA CAGAAATCAG ATTGACTATG TGCTCTG-CA GCCAAAGATG 1026 |       |       |       |
| BovB_Pg-RTE-Perameles_gunnii   | -----                                                                             | ----- | ----- | ----- |
| BovB_lo-RTE-Isodon_obesulus    | -----                                                                             | ----- | ----- | ----- |
| BovB_Bp-RTE-Burramys_parvulus  | -----                                                                             | ----- | ----- | ----- |
| BovB_Pb-RTE-Petaurus_breviceps | -----                                                                             | ----- | ----- | ----- |
| BovB_Ma-RTE-Macropus_antilopin | AAAGGCAACT CTACACATGG ACATACCAG ATAGTCAATA TCAAAATCAG ATTGATTATA CACTTTGCGAG 1140 |       |       |       |
| BovB_Af-RTE-Antechinus_flavipe | AGACAAACAG AGTTTTATAA CTCTATTTG AACTTTCTG TCATAGCAAA CATACTTCTT TTCAACAATC 340    |       |       |       |
| BovB_Ac-RTE-Anolis_carolinensi | ACACATGGAC TTCACCAGAT --GGTCAACA CCGAAATCAA ATTGACTACA TACTCTG-CA GACAAAGGTG 990  |       |       |       |
| BovB_BM-RTE-Bombyx_mori        | ATACATGGAA ATCACCAGGT --GACAGATT CAGGAACAG ATTAACATA TATTGAT-CA ACTCTCGCTG 858    |       |       |       |
| BovB_Dr-RTE-Christinus         | ACACATGGAC GGCCCAAAT --G--GATA TGGCAACAG ATTGACTACA TCCTGTG-TC AAAAAAGCTG 893     |       |       |       |
| BovB_La-RTE-Loxodonta_africana | ACACATGGAC CTCACCAGAT --GGAACACA CAGAAATCAA ATCGACTACA TCTGTGG-AA AGAGACGATG 1019 |       |       |       |
| BovB_Pc-RTE-Procavia_capensis  | ACACATGGAC CTCACCAGAT --GGAATACA CAGGAACCAA ATTGACTACA TCTGTGG-AA AAAGATGATG 1023 |       |       |       |
| BovB_Et-RTE-Christinus         | ACACATGGAC TTCCCCAGAT --GAAATACA CAGAAATCAA ATTGACTACA TTTGTGG-GA AGTCAGGATG 862  |       |       |       |
| BovB-Ta-RTE-Tachyglossus_acule | ACACATGGAC TTCACCAGAT --GGACTATA TAGAAATCAA ATAGACTATA TTATTTG-TA GAAAGAGATG 1160 |       |       |       |
| BovB_Plat-RTE-Ornithorhynchus  | ACACATGGAC TTCACCAGAT --GGACTATA TAGAAATCAA ATAGACTATA TTATTTG-TA GAAAGAGATG 1149 |       |       |       |
| BovB_Ec-RTE-Equus_caballus     | ATACATGGAC ATCACCAGAT --GGCCAATA TAGAAATCAA ATAGACTATG TAATTGG-AA GCAGGAGATG 919  |       |       |       |
| BovB_Cg-RTE-Christinus         | ATATGTGGAC ATCACTAGAT --GGCCAATA CAGAAATCAA ATAGATTACA TAATAGG-AA AAAAAAGATG 532  |       |       |       |
| BovB_Bh-RTE-Bothriocroton_hydr | -----                                                                             | ----- | ----- | ----- |
| BovB_MI-RTE-Gehyra_variegata   | -----                                                                             | ----- | ----- | ----- |
| Sly-rnd1_family284-LINE/RTEBov | -----                                                                             | ----- | ----- | ----- |
| Sly-rnd5_family2019-LINE/RTEBo | -----                                                                             | ----- | ----- | ----- |
| Sly-rnd3_family322-LINE/RTEBov | -----                                                                             | ----- | ----- | ----- |
| Sly-rnd5_family1698-LINE/RTEBo | -----                                                                             | ----- | ----- | ----- |
| Sly-rnd1_family795-LINE/RTEBov | -----                                                                             | ----- | ----- | ----- |
| Stu-rnd-5_family-3162_LINE_RTE | GAACCTAGTT GCTGCTGGGC CCTGTCTTGC AGACTCCTTA TCCCGGAACA GTACTTCCCA GTTTTCTTAA 629  |       |       |       |
| Sly-rnd6_family1960-LINE/RTEBo | -----                                                                             | ----- | ----- | ----- |
| Stu-rnd-5_family-2493_LINE_RTE | -----                                                                             | ----- | ----- | ----- |
| Sly-rnd5_family447-LINE/RTEBov | -----                                                                             | ----- | ----- | ----- |
| Stu-rnd-6_family-2093_LINE_RTE | -----                                                                             | ----- | ----- | ----- |
| Consensus                      | -----                                                                             | ----- | ----- | ----- |

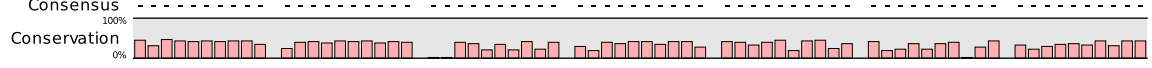

|                                | 1,840        |              |             | 1,860          |              |                 | 1,880      |       |
|--------------------------------|--------------|--------------|-------------|----------------|--------------|-----------------|------------|-------|
| Stu-rnd-1_family-417_LINE_RTE  | -----        | -----        | -----       | -----          | -----        | -----           | -----      | ----- |
| Sly-rnd1_family377-LINE/RTEBov | -----        | -----        | -----       | -----          | -----        | -----           | -----      | ----- |
| Stu-rnd-1_family-489_LINE_RTE  | -----        | -----        | -----       | -----          | -----        | -----           | -----      | ----- |
| Stu-rnd-1_family-607_LINE_RTE  | -----        | -----        | -----       | -----          | -----        | -----           | -----      | ----- |
| Stu-rnd-1_family-645_LINE_RTE  | -----        | -----        | -----       | -----          | -----        | -----           | -----      | ----- |
| Sly-rnd4_family81-LINE/RTEBovB | -----        | -----        | -----       | -----          | -----        | -----           | -----      | ----- |
| Stu-rnd-6_family-408_LINE_RTE  | -----        | -----        | -----       | -----          | -----        | -----           | -----      | ----- |
| Stu-rnd-1_family-351_LINE_RTE  | -----        | -----        | -----       | -----          | -----        | -----           | -----      | ----- |
| Stu-rnd-1_family-382_LINE_RTE  | -----        | -----        | -----       | -----          | -----        | -----           | -----      | ----- |
| Sly-rnd6_family746-LINE/RTEBov | -----        | -----        | -----       | -----          | -----        | -----           | -----      | ----- |
| Stu-rnd-5_family-325_LINE_RTE  | -----        | -----        | -----       | -----          | -----        | -----           | -----      | ----- |
| Sly-rnd4_family509-LINE/RTEBov | -----        | -----        | -----       | -----          | -----        | -----           | -----      | ----- |
| Stu-rnd-1_family-513_LINE_RTE  | -----        | -----        | -----       | -----          | -----        | -----           | -----      | ----- |
| Sly-rnd5_family1442-LINE/RTEBo | -----        | -----        | -----       | -----          | -----        | -----           | -----      | ----- |
| BovB_GI-RTE-Gehyra_lazelli     | GAGAAGCTCT   | A - TACAGTCA | GCAAAAAACAA | G - - - ACCTGG | AGCTGACTGT   | GGCTCAGATC      | ATGAGCTACT | 1233  |
| BovB_Gv-RTE-Gehyra_variegata   | GAGAAGCTCT   | A - TACAGTCA | GCAAAAAACAA | G - - - ACCTGG | AGCTGACTGT   | GGCTCAGATC      | ATGAGCTACT | 1157  |
| BovB_PMo-RTE-Python_molurus    | GAGAAGCTCT   | A - TACAGACA | GCAAAAAACAA | G - - - ACCAGG | AGCTGACTGT   | GGCTCAGATC      | ATGAGCTTCT | 1099  |
| BovB_Oa-RTE-Ovis_aries         | GAGAAGCTCT   | A - TACAGTCA | GCAAAAAACAA | G - - - ACCTGG | AGCTGACTGT   | GGCTCAGATC      | ATGAACTCCT | 1123  |
| BovB-RTE-Bos_taurus            | GAGAAGCTCT   | A - TACAGTCA | GCAAAAAACAA | G - - - ACCAGG | AGCTGACTGT   | GGCTCAGACC      | ATGAACTCCT | 1721  |
| BovB_Me-RTE-Macropus_eugenii   | GAAAAGCTCT   | A - TGCAGTCA | GTTAAAAACAA | AGATACCTGG     | AGCTGACTGT   | GGCTCAGATC      | TTGAGTTTCT | 979   |
| BovB_Ano-RTE-Amphibolurus_norr | GAGAAGCTCT   | A - TACAGTCA | GCAAAAAACAA | G - - - ACCTGG | AGCTGATTGT   | GGCTCTGATC      | ATCAGCTTCT | 1170  |
| BovB_Gd-RTE-Eremiascincus_doug | GAGAAGCTCT   | A - TACAGGCA | GTCAAAAACAA | G - - - ACCTGG | AGCTGACTGT   | GGCTCAGATC      | ATGAGCTTCT | 756   |
| BovB_Er-RTE-Eremiascincus_rich | GAGAAGCTCT   | A - TACAGGCA | GTCAAAAACAA | G - - - ACCTGG | AGCTGACTGT   | GGCTCAGATC      | ATGAGCTTCT | 1293  |
| BovB_Ca-RTE-Ctenotus_atlas     | GAGAAGCTCT   | A - TACAGGCA | GTCAAAAACAA | G - - - ACCTGG | AGCTGACTGT   | GGCTCAGATC      | ATGAGCTTCT | 1285  |
| BovB_Es-RTE-Egernia_stokesii   | GAGAAGCTCT   | A - TACAGTCA | GTCAAAAACAA | A - - - ACCTGG | AGCTGACTGT   | GGATCAGATC      | ATGAGCTTCT | 1117  |
| BovB_Tr-RTE-Tiliqua_rugosa     | GAGAAGCTCT   | A - CACAGTCA | GTCAAAAACAA | G - - - ACCTGA | AGCTGACTGC   | AGATCAGATC      | ATGAGCATCT | 1131  |
| BovB_ALI-RTE-Amblyomma_limbatu | GAGAAGTTCT   | AGTACAGTCA   | GTCAAAAACTA | G - - - ACCACG | AACTGATTGT   | GGCTCAGATC      | ATCAGCTTCT | 1255  |
| BovB_Hs-RTE-Hydrophis_spiralis | -----        | -----        | -----       | -----          | -----        | -----           | -----      | ----- |
| BovB_VA-RTE-Vipera_ammodytes   | GAGAAGCTCT   | A - TACAGTCA | GTCAAAAACAA | G - - - ACCAGG | AGCTGACTGT   | GGCTCAGACC      | ATGAGCTTCT | 1091  |
| BovB_ACo-RTE-Agkistrodon_conto | GAGAAGCTCT   | A - TACAGTCA | GTCAAAAACAA | G - - - ACCAGG | AGCTGACTGT   | GGCTCAGATC      | ATGAGCTTCT | 1092  |
| BovB_Pg-RTE-Perameles_gunnii   | -----        | -----        | -----       | -----          | -----        | -----           | -----      | ----- |
| BovB_lo-RTE-Isodon_obesulus    | -----        | -----        | -----       | -----          | -----        | -----           | -----      | ----- |
| BovB_Bp-RTE-Burramys_parvulus  | -----        | -----        | -----       | -----          | -----        | -----           | -----      | ----- |
| BovB_Pb-RTE-Petaurus_breviceps | -----        | -----        | -----       | -----          | -----        | -----           | -----      | ----- |
| BovB_Ma-RTE-Macropus_antilopin | CCA AAGGTGA  | AGAAGCAATA   | TACAGTCAGT  | TAAAGCAAAA     | CCTGAAGCTG   | ACTGTGACTG      | AGATCATGAG | 1210  |
| BovB_Af-RTE-Antechinus_flavipe | CAAAAAGATGA  | TTACATACGT   | AGCATCACC   | AGATAGATGG     | TCGATATAGA   | AATAAAATTG      | ATTATTTACT | 410   |
| BovB_Ac-RTE-Anolis_carolinensi | GCAGACATCC   | A - TCCAGTCG | GCGAAAAACAA | G - - - ACCTGG | AGCTGACTGT   | AGCTCAAATC      | ACAAACTTCT | 1056  |
| BovB_BM-RTE-Bombyx_mori        | GAGGTCCACC   | G - TATCAAAT | GTCAGACCT   | A - - - TCCTGG | GGCGGACTGT   | GGTTCCAGAC      | ATGTGCTCCT | 924   |
| BovB_Dr-RTE-Christinus         | GAAGAACTCA   | G - TACAGGTA | GTCAAAACCG  | T - - - TCCTGG | TGCAGACTGC   | GGCTGTGACC      | ACCAGCTACT | 959   |
| BovB_La-RTE-Loxodonta_africana | GAAAAGCTCA   | A - TATCATCA | GTCAGAACAA  | G - - - GCCAGG | GGCCGACTGT   | GGAACAGACC      | ATCAATTGCT | 1085  |
| BovB_Pc-RTE-Procavia_capensis  | GAAAAGCTCC   | A - TATCAGCA | GTCAGAACAA  | G - - - ACCAGG | TGCTGACTGT   | GGCACAGATC      | ATCAATTGCT | 1089  |
| BovB_Et-RTE-Christinus         | GAGAAGCTTG   | A - TATCAACC | GCTAAAACCA  | G - - - ACCAGG | AGCTGACTGT   | GGAACAGACC      | ATCAATGGCT | 928   |
| BovB_Ta-RTE-Tachyglossus_acule | GAGGAGTTCT   | A - TTTTGGCA | GCAAAAACAT  | G - - - GCCTGG | AGCTGATTGT   | GGAACAGATC      | ACGAGCTGTT | 1226  |
| BovB_Plat-RTE-Ornithorhynchus  | GAGGAGTTCT   | A - TTTTGGCA | GCAAAAACAT  | G - - - GCCTGG | AGCTGACTGT   | GGAACAGATC      | ATGAGCTGTT | 1215  |
| BovB_Ec-RTE-Equus_caballus     | GAGAAGCTGT   | A - TTCTCTCT | GCCAAAAACAA | G - - - ACCAGG | AGCAGATTGT   | GGTACTGACC      | ACGAACTGTT | 985   |
| BovB_Cg-RTE-Christinus         | GAGAA - CAGT | T - GACACACA | GCCTTTACAA  | A - - - CTTGGG | AA - AGATTTT | G - - - - - - - | -----      | 577   |
| BovB_Bh-RTE-Bothriocroton_hydr | -----        | -----        | -----       | -----          | -----        | -----           | -----      | ----- |
| BovB_MI-RTE-Gehyra_variegata   | -----        | -----        | -----       | -----          | -----        | -----           | -----      | ----- |
| Sly-rnd1_family284-LINE/RTEBov | -----        | -----        | -----       | -----          | -----        | -----           | -----      | ----- |
| Sly-rnd5_family2019-LINE/RTEBo | -----        | -----        | -----       | -----          | -----        | -----           | -----      | ----- |
| Sly-rnd3_family322-LINE/RTEBov | -----        | -----        | -----       | -----          | -----        | -----           | -----      | ----- |
| Sly-rnd5_family1698-LINE/RTEBo | -----        | -----        | -----       | -----          | -----        | -----           | -----      | ----- |
| Sly-rnd1_family795-LINE/RTEBov | -----        | -----        | -----       | -----          | -----        | -----           | -----      | ----- |
| Stu-rnd-5_family-3162_LINE_RTE | TAAAGCTCTG   | ACCTGTGCTT   | CAGTCTTTAG  | TAGAGTGGGT     | GCTATCGTGG   | CCTCTGGATT      | ACACACTGTT | 699   |
| Sly-rnd6_family1960-LINE/RTEBo | -----        | -----        | -----       | -----          | -----        | -----           | -----      | ----- |
| Stu-rnd-5_family-2493_LINE_RTE | -----        | -----        | -----       | -----          | -----        | -----           | -----      | ----- |
| Sly-rnd5_family447-LINE/RTEBov | -----        | -----        | -----       | -----          | -----        | -----           | -----      | ----- |
| Stu-rnd-6_family-2093_LINE_RTE | -----        | -----        | -----       | -----          | -----        | -----           | -----      | ----- |
| Consensus                      | -----        | -----        | -----       | -----          | -----        | -----           | -----      | ----- |
| Conservation                   |              |              |             |                |              |                 |            |       |

|                                | 1,900        | 1,920        | 1,940       | 1,960        |              |              |              |            |     |
|--------------------------------|--------------|--------------|-------------|--------------|--------------|--------------|--------------|------------|-----|
| Stu-rnd-1_family-417_LINE_RTE  | -----        | -----        | -----       | -----        | -----        |              |              |            |     |
| Sly-rnd1_family377-LINE/RTEBov | -----        | -----        | -----       | -----        | -----        |              |              |            |     |
| Stu-rnd-1_family-489_LINE_RTE  | -----        | -----        | -----       | -----        | -----        |              |              |            |     |
| Stu-rnd-1_family-607_LINE_RTE  | -----        | -----        | -----       | -----        | -----        |              |              |            |     |
| Stu-rnd-1_family-645_LINE_RTE  | -----        | -----        | -----       | -----        | -----        |              |              |            |     |
| Sly-rnd4_family81-LINE/RTEBovB | -----        | -----        | -----       | -----        | -----        |              |              |            |     |
| Stu-rnd-6_family-408_LINE_RTE  | -----        | -----        | -----       | -----        | -----        |              |              |            |     |
| Stu-rnd-1_family-351_LINE_RTE  | -----        | -----        | -----       | -----        | -----        |              |              |            |     |
| Stu-rnd-1_family-382_LINE_RTE  | -----        | -----        | -----       | -----        | -----        |              |              |            |     |
| Sly-rnd6_family746-LINE/RTEBov | -----        | -----        | -----       | -----        | -----        |              |              |            |     |
| Stu-rnd-5_family-325_LINE_RTE  | -----        | -----        | -----       | -----        | -----        |              |              |            |     |
| Sly-rnd4_family509-LINE/RTEBov | -----        | -----        | -----       | -----        | -----        |              |              |            |     |
| Stu-rnd-1_family-513_LINE_RTE  | -----        | -----        | -----       | -----        | -----        |              |              |            |     |
| Sly-rnd5_family1442-LINE/RTEBo | -----        | -----        | -----       | -----        | -----        |              |              |            |     |
| BovB_GI-RTE-Gehyra_lazelli     | CAT - TGCAA  | ATTTAGGCTT   | AAACTGAAGA  | AA - ATTGGGA | AAAC - -CACT | AGGCC - TTTC | AGGTTTGACT   | 1298       |     |
| BovB_Gv-RTE-Gehyra_variegata   | CAT - TGCAA  | ATTTAGGCTT   | AAACTGAAGA  | AA - ATTGGGA | AAAC - -CACT | AGGCCCTTTC   | AGGTTTAACT   | 1223       |     |
| BovB_PMo-RTE-Python_molurus    | TAC - TGCAA  | ATTTAGGCTT   | AAATTGAAGA  | AT - GTAGGGA | AAAC - -CACT | AGACC - ACTC | AGGTATGACT   | 1164       |     |
| BovB_Oa-RTE-Ovis_aries         | TAT - TGCAA  | ATTCAGACTT   | AAATTGAAGA  | AA - GTAGGGA | AAAC - -CACT | AGACC - ATTC | AGGTATGACC   | 1188       |     |
| BovB-RTE-Bos_taurus            | TAT - TGCAA  | ATTCAGACTT   | AAATTGAAGA  | AA - GTAGGGA | AAAC - -CACT | AGACC - ATTC | AGGTATGACC   | 1786       |     |
| BovB_Me-RTE-Macropus_eugenii   | TGC - TGAAA  | ATTCAGAC - - | AAATTGAAGA  | AA - GTAGGGA | AATC - -AATC | ATACC - ATAT | AGGTATGACA   | 1042       |     |
| BovB_Ano-RTE-Amphibolurus_norr | CAT - AGCAA  | ATTCAGACTT   | AGACTGAAGA  | GA - GTAGGAA | AAAC - -CACT | GGGCC - ACTC | AGGTATAATC   | 1235       |     |
| BovB_Gd-RTE-Eremiascincus_doug | TATAGGCAAA   | ATTCAGGCTT   | AAACTTAAAA  | AA - GTAGGGA | AAAC - -CACT | AGGCC - CTCC | ACGTATGACC   | 822        |     |
| BovB_Er-RTE-Eremiascincus_rich | TAT - GGCAA  | ATTCAGGCTT   | AAACTGAAAA  | AA - GTAGGGA | AAAC - -CACT | AGGCC - CTCC | ACGTATGACC   | 1358       |     |
| BovB_Ca-RTE-Ctenotus_atlas     | TAT - TGCAA  | ATTCAGGCTT   | AAACTGAAAA  | AAAGTAGGGA   | AAAC - -CACT | AGGCC - CTCC | ACGTATGACC   | 1351       |     |
| BovB_Es-RTE-Egernia_stokesii   | TAT - TGCAA  | ATTCAGGCTT   | AAACTGAAGA  | AA - GTAGGGA | AAAAAACATT   | AGGCC - ATTC | AGGTACGACC   | 1184       |     |
| BovB_Tr-RTE-Tiliqua_rugosa     | TAT - TACAAA | ATTCAGGCTT   | AAACTGAAGA  | AA - GTAGGGA | AAAA - CATT  | AGGCC - AATC | AGGTATGACC   | 1196       |     |
| BovB_ALi-RTE-Amblyomma_limbatu | TTT - TGCAA  | ATTTAGGCTT   | AAGTTGAAGA  | AA - GTAGGAA | AAAG - -CACA | ATGCC - ACTC | AAGTATTACC   | 1320       |     |
| BovB_Hs-RTE-Hydrophis_spiralis | -----        | -----        | -----       | -----        | -----        | -----        | -----        | -----      |     |
| BovB_VA-RTE-Vipera_ammodytes   | CGT - TGCAA  | GTTTAGGCTT   | AAACTGAAGA  | AA - GTAGGGA | AAAG - -CACT | AGGCC - ACTC | AGGTATGAAT   | 1156       |     |
| BovB_ACo-RTE-Agkistrodon_conto | CGT - TGCAA  | ATTTAGGCTT   | AAATTGAAGA  | AA - GTAGGGA | AAA - -CACT  | AGGCC - ACTC | AGGTATGAAC   | 1156       |     |
| BovB_Pg-RTE-Perameles_gunnii   | -----        | -----        | -----       | -----        | -----        | -----        | -----        | -----      |     |
| BovB_lo-RTE-Isodon_obesulus    | -----        | -----        | -----       | -----        | -----        | -----        | -----        | -----      |     |
| BovB_Bp-RTE-Burramys_parvulus  | -----        | -----        | -----       | -----        | -----        | -----        | -----        | -----      |     |
| BovB_Pb-RTE-Petaurus_breviceps | -----        | -----        | -----       | -----        | -----        | -----        | -----        | -----      |     |
| BovB_Ma-RTE-Macropus_antilopin | TTTCTTATTC   | CAAAATTCAC   | ACTTAAATGG  | AAGAAAGTAG   | GAAA - -AACC | ATCAGAACAT   | ATAGGTATGA   | 1278       |     |
| BovB_Af-RTE-Antechinus_flavipe | TTGCCATGAA   | AGGCAAAGTT   | CTATATAGCT  | AGTTAAAACG   | CAAA - -ATTC | AGACGAAAAT   | TTGAAGAAAG   | 478        |     |
| BovB_Ac-RTE-Anolis_carolinensi | TAT - TGCAA  | ATTCAGAATC   | AAACTAAAAGA | GA - ATGGGGA | AAAT - -ACAC | AGACC - AATT | AGATATGACA   | 1121       |     |
| BovB_BM-RTE-Bombyx_mori        | GGT - TGCAA  | CTTCGGCTG    | CGCCTCAAAG  | CG - -CAAAA  | CGTA - - -AA | TGCAATTTAT   | AGACCCGG - A | 986        |     |
| BovB_Dr-RTE-Christinus         | CAT - TGCAA  | AGTCAAATTT   | CGATTCAACA  | CCATCAAAG    | GCTT - - -CC | TACAAATGCCG  | CGTTTTGACA   | 1024       |     |
| BovB_La-RTE-Loxodonta_africana | CAT - ATGCAA | GTAAGAGC - - | AAACTGAAGA  | AAATCAGAGC   | AAGT - - -CC | ATGAGAGCCA   | AAGTACAACC   | 1148       |     |
| BovB_Pc-RTE-Procavia_capensis  | CAT - ATGCAA | ATTCAAATTC   | AAACTGAAGA  | AAATTAGAAC   | AAGT - - -CC | ACGAGAGCCA   | AAGTATGACC   | 1154       |     |
| BovB_Et-RTE-Christinus         | CCT - ATATA  | GTTTAGGATA   | AAGCTGAAGA  | AAATTAATAA   | AAGT - - -CC | ACAAGAGCCA   | AAATATGACC   | 993        |     |
| BovB_Ta-RTE-Tachyglossus_acule | AAT - GTGTAA | ACTCAGGCTA   | AAACTTAGAA  | AGATCAATCA   | TGCC - - -TT | ACAGCTGCC    | AAATATGACC   | 1291       |     |
| BovB_Plat-RTE-Ornithorhynchus  | AAT - GTGTAA | ACTCAGGCTA   | AAACTTAGAA  | AGATCAATCA   | TGCC - - -TT | ACAGCTGCC    | AAATATGACC   | 1280       |     |
| BovB_Ec-RTE-Equus_caballus     | AAT - ATCAAA | TATCAGAGTA   | AAGCTGAAGA  | AGAGCACTAA   | AAGA - - -AT | CGTAGTGCCA   | AAATATAACG   | 1050       |     |
| BovB_Cg-RTE-Christinus         | -----        | ATCAGC       | TACCGGGGAA  | GAGCAGAAGA   | AAAAACCCCA   | AACA - - -GT | CAAAGTACAA   | AAATATAATA | 639 |
| BovB_Bh-RTE-Bothriocroton_hydr | -----        | -----        | -----       | -----        | -----        | -----        | -----        | -----      |     |
| BovB_MI-RTE-Gehyra_variegata   | -----        | -----        | -----       | -----        | -----        | -----        | -----        | -----      |     |
| Sly-rnd1_family284-LINE/RTEBov | -----        | -----        | -----       | -----        | -----        | -----        | -----        | -----      |     |
| Sly-rnd5_family2019-LINE/RTEBo | -----        | -----        | -----       | -----        | -----        | -----        | -----        | -----      |     |
| Sly-rnd3_family322-LINE/RTEBov | -----        | -----        | -----       | -----        | -----        | -----        | -----        | -----      |     |
| Sly-rnd5_family1698-LINE/RTEBo | -----        | -----        | -----       | -----        | -----        | -----        | -----        | -----      |     |
| Sly-rnd1_family795-LINE/RTEBov | -----        | -----        | -----       | -----        | -----        | -----        | -----        | -----      |     |
| Stu-rnd-5_family-3162_LINE_RTE | CTGGACACTA   | TAGTGTAGCT   | GCTGTATAC   | TGTCCTTAG    | AGTGACTAC    | TGCTGCAGCT   | TGTTTTAAG    | 769        |     |
| Sly-rnd6_family1960-LINE/RTEBo | -----        | -----        | -----       | -----        | -----        | -----        | -----        | -----      |     |
| Stu-rnd-5_family-2493_LINE_RTE | -----        | -----        | -----       | -----        | -----        | -----        | -----        | -----      |     |
| Sly-rnd5_family447-LINE/RTEBov | -----        | -----        | -----       | -----        | -----        | -----        | -----        | -----      |     |
| Stu-rnd-6_family-2093_LINE_RTE | -----        | -----        | -----       | -----        | -----        | -----        | -----        | -----      |     |
| Consensus                      | -----        | -----        | -----       | -----        | -----        | -----        | -----        | -----      |     |

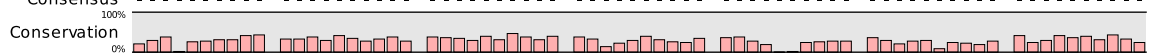



|                                | 1,980       | 2,000      | 2,020       |                                                   |
|--------------------------------|-------------|------------|-------------|---------------------------------------------------|
| Stu-rnd-1_family-417_LINE_RTE  | -----       | -----      | -----       | -----                                             |
| Sly-rnd1_family377-LINE/RTEBov | -----       | -----      | -----       | -----                                             |
| Stu-rnd-1_family-489_LINE_RTE  | -----       | -----      | -----       | -----                                             |
| Stu-rnd-1_family-607_LINE_RTE  | -----       | -----      | -----       | -----                                             |
| Stu-rnd-1_family-645_LINE_RTE  | -----       | -----      | -----       | -----                                             |
| Sly-rnd4_family81-LINE/RTEBovB | -----       | -----      | -----       | -----                                             |
| Stu-rnd-6_family-408_LINE_RTE  | -----       | -----      | -----       | -----                                             |
| Stu-rnd-1_family-351_LINE_RTE  | -----       | -----      | -----       | -----                                             |
| Stu-rnd-1_family-382_LINE_RTE  | -----       | -----      | -----       | -----                                             |
| Sly-rnd6_family746-LINE/RTEBov | -----       | -----      | -----       | -----                                             |
| Stu-rnd-5_family-325_LINE_RTE  | -----       | -----      | -----       | -----                                             |
| Sly-rnd4_family509-LINE/RTEBov | -----       | -----      | -----       | -----                                             |
| Stu-rnd-1_family-513_LINE_RTE  | -----       | -----      | -----       | -----                                             |
| Sly-rnd5_family1442-LINE/RTEBo | -----       | -----      | -----       | -----                                             |
| BovB_GI-RTE-Gehyra_lazelli     | TAGATCACAT  | TCCTTATGAA | TATACAGTGG  | AGGT-----G AAAAATAGGT TTAAGGGACT -AGATTTGAT 1362  |
| BovB_Gv-RTE-Gehyra_variegata   | TAGATCACAT  | TCCTTATGAA | TATACAGTGG  | AGGT-----G AAAAATAGGT TTAAGGGACT -AGAGTTGAT 1287  |
| BovB_PMo-RTE-Python_molurus    | TAGATCATAT  | TCCTTGTGAG | TACACAGTGA  | AGGT-----G ATGAATAGAT TTAGAGGATT -AGATTTGGT 1228  |
| BovB_Oa-RTE-Ovis_aries         | TAAATCAAAAT | CCCTTATGAT | TATACAGTGG  | AAGT-----G ACAAATAGAT TCAAGGGATT -AGATCTGAT 1252  |
| BovB-RTE-Bos_taurus            | TAAATCAAAAT | CCCTTATGAT | TATACAGTGG  | AAGT-----G AGAAATAGAT TTAAGGGCCT -AGATCTGAT 1850  |
| BovB_Me-RTE-Macropus_eugenii   | TATA--ATAT  | CCCTTATGAA | TGTGAAGTGG  | AAGT-----G ATGAATAGAT TTAAGGCTTT -AGATATGGT 1104  |
| BovB_Ano-RTE-Amphibolurus_norr | TAAACCAAAT  | CCCTTATGAA | TACACAGTGG  | AAGT-----G AAGAACAGAT TTAAGGAAC T -AGATTTGGT 1299 |
| BovB_Gd-RTE-Eremiascincus_doug | TAAATCAGAT  | CCCATATGAA | TATACAGTGG  | AGGT-----G ACCAATAGAT TTAGGGGCTT -AGATTTGGT 886   |
| BovB_Er-RTE-Eremiascincus_rich | TAAATCAGAT  | CCCATACGAA | TATACAGTGG  | AGGT-----G ACCAATAGAT TTAGGGGCTT -AGATTTGGT 1422  |
| BovB_Ca-RTE-Ctenotus_atlas     | TAAATCAGAT  | CCCATACGAA | TATACAGTGG  | AGGT-----G ACTAATAGAT TTAGGGGCTT -AGATTTGGT 1415  |
| BovB_Es-RTE-Egernia_stokesii   | TAAATCATAT  | TCCATATGAA | TACACAGTGG  | AGGT-----G ACAAATAGAT TTAAGGTTT -AGATTTGGT 1248   |
| BovB_Tr-RTE-Tiliqua_rugosa     | TAAATCATAT  | TCCACATGAA | TACACAGTGG  | AGGT-----G ACAAATAGAT TTAAGGTTT -AGATTTGAG 1260   |
| BovB_ALi-RTE-Amblyomma_limbato | TAAATCATAT  | CTCATATGAA | TATACAGTAA  | AGGT-----G ACAAATAGAT TTAAGGAAT -AGATCTGAT 1384   |
| BovB_Hs-RTE-Hydrophis_spiralis | -----       | -----      | -----       | -----                                             |
| BovB_VA-RTE-Vipera_ammodytes   | TAAATCATAT  | CCCTGTTGAA | TATACAGTAG  | AGGT-----G ACAAATAGAT TTAAGGAAT -AGATCTGAT 1220   |
| BovB_ACo-RTE-Agkistrodon_conto | TAAATCATAT  | CCCTGATGAA | TATACAGTAG  | AGGT-----G ACAAATAGAT TTAAGGAAT -AGATCTGAT 1220   |
| BovB_Pg-RTE-Perameles_gunnii   | -----       | -----      | -----       | -----                                             |
| BovB_lo-RTE-Isodon_obesulus    | -----       | -----      | -----       | -----                                             |
| BovB_Bp-RTE-Burramys_parvulus  | -----       | -----      | -----       | -----                                             |
| BovB_Pb-RTE-Petaurus_breviceps | -----       | -----      | -----       | -----                                             |
| BovB_Ma-RTE-Macropus_antilopin | CCTAAATAAC  | ATCCCTTATG | AATATGAAGT  | GGAA-----G TGATGAATAG ATTTAAGGGA -TTAGATCTG 1342  |
| BovB_Af-RTE-Antechinus_flavipe | TAGGGGAAAT  | CATCAGATCA | TATAGGTATA  | ATCT-----A AACAAATCC CTTATAATAT -AAAGTAAA 542     |
| BovB_Ac-RTE-Anolis_carolinensi | TAAACAAACAT | TCATAGTGAA | TATGCAAGTGG | AGGT-----G AAGAATAGAT TTAGGAACT -AGATGTAAT 1185   |
| BovB_BM-RTE-Bombyx_mori        | CAAGCAAGAT  | AGCTTC-CGC | AATGCTCTCG  | AAA-----G AACAGCT TTTAGGTACA ACACCAACCAG 1045     |
| BovB_Dr-RTE-Christinus         | CCAGTAAGAT  | CCCAACACAA | TATGCAAGTGG | AGGT-----A AATAATAGAT TTGATCACT -CGCTACAAC 1088   |
| BovB_La-RTE-Loxodonta_africana | TTGAGTATAT  | CCCACCTGAA | TTTAGAGACC  | ATATGATGAC AGCAAGAGAT TTGACACATT -GAACACTAA 1217  |
| BovB_Pc-RTE-Procavia_capensis  | TTGAGTATAT  | CCCTCCTGAG | TTTTAAGACC  | ATCT-----C AAGAACAGAT TTGATGTGTT -GATCACTAA 1218  |
| BovB_Et-RTE-Christinus         | TTGAGTCTAT  | CTCAGCTGAA | TTTTGAGAGC  | ATCT-----T AAGAGCAGAT TTGATGCACT -GAACAATAG 1057  |
| BovB_Ta-RTE-Tachyglossus_acule | TGATGAATAT  | TCCCCTGTGA | TTTTAAGGATC | ATGT-----A AAAAATAGAT TTAGGTTGCT -TAATCTCAC 1355  |
| BovB_Plat-RTE-Ornithorhynchus  | TGACGAATAT  | TCCCCTGTGA | TTTTAAGGATC | ATGT-----A AAAAATAGAT TTAGGCGCT -TAATCTCAC 1344   |
| BovB_Ec-RTE-Equus_caballus     | TAAACAACAT  | TCCCAATGAA | TTTTAAGTCC  | ACAT-----A AAAAACAGAT TTGCATTGTT -AAACTTAAT 1114  |
| BovB_Cg-RTE-Christinus         | TAAACAACAT  | TCTTAAAGAA | TTTGAAGAAC  | ATAT-----A AGGAACATA TAGCATTATT -AAGTTAAT 703     |
| BovB_Bh-RTE-Bothriocroton_hydr | -----       | -----      | -----       | -----                                             |
| BovB_MI-RTE-Gehyra_variegata   | -----       | -----      | -----       | -----                                             |
| Sly-rnd1_family284-LINE/RTEBov | -----       | -----      | -----       | -----                                             |
| Sly-rnd5_family2019-LINE/RTEBo | -----       | -----      | -----       | -----                                             |
| Sly-rnd3_family322-LINE/RTEBov | -----       | -----      | -----       | -----                                             |
| Sly-rnd5_family1698-LINE/RTEBo | -----       | -----      | -----       | -----                                             |
| Sly-rnd1_family795-LINE/RTEBov | -----       | -----      | -----       | -----                                             |
| Stu-rnd-5_family-3162_LINE_RTE | TGTTTGTCTG  | TGTAGATCTT | TCATTAGTTT  | CAGTATTTTC TAGTGGATTT GGTATCCGAT GGTGGTACTA 839   |
| Sly-rnd6_family1960-LINE/RTEBo | -----       | -----      | -----       | -----                                             |
| Stu-rnd-5_family-2493_LINE_RTE | -----       | -----      | -----       | -----                                             |
| Sly-rnd5_family447-LINE/RTEBov | -----       | -----      | -----       | -----                                             |
| Stu-rnd-6_family-2093_LINE_RTE | -----       | -----      | -----       | -----                                             |
| Consensus                      | -----       | -----      | -----       | -----A-----                                       |

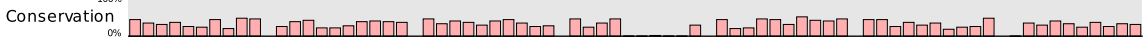

|                                | 2,040       | 2,060      | 2,080      | 2,100      |            |            |            |               |
|--------------------------------|-------------|------------|------------|------------|------------|------------|------------|---------------|
| Stu-rnd-1_family-417_LINE_RTE  | -----       | -----      | -----      | -----      | -----      |            |            |               |
| Sly-rnd1_family377-LINE/RTEBov | -----       | -----      | -----      | -----      | -----      |            |            |               |
| Stu-rnd-1_family-489_LINE_RTE  | -----       | -----      | -----      | -----      | -----      |            |            |               |
| Stu-rnd-1_family-607_LINE_RTE  | -----       | -----      | -----      | -----      | -----      |            |            |               |
| Stu-rnd-1_family-645_LINE_RTE  | -----       | -----      | -----      | -----      | -----      |            |            |               |
| Sly-rnd4_family81-LINE/RTEBovB | -----       | -----      | -----      | -----      | -----      |            |            |               |
| Stu-rnd-6_family-408_LINE_RTE  | -----       | -----      | -----      | -----      | -----      |            |            |               |
| Stu-rnd-1_family-351_LINE_RTE  | -----       | -----      | -----      | -----      | -----      |            |            |               |
| Stu-rnd-1_family-382_LINE_RTE  | -----       | -----      | -----      | -----      | -----      |            |            |               |
| Sly-rnd6_family746-LINE/RTEBov | -----       | -----      | -----      | -----      | -----      |            |            |               |
| Stu-rnd-5_family-325_LINE_RTE  | -----       | -----      | -----      | -----      | -----      |            |            |               |
| Sly-rnd4_family509-LINE/RTEBov | -----       | -----      | -----      | -----      | -----      |            |            |               |
| Stu-rnd-1_family-513_LINE_RTE  | -----       | -----      | -----      | -----      | -----      |            |            |               |
| Sly-rnd5_family1442-LINE/RTEBo | -----       | -----      | -----      | -----      | -----      |            |            |               |
| BovB_GI-RTE-Gehyra_lazelli     | AGACAGAGCA  | C-CTGAAGAA | CTATGGACGG | AAGTTCGTGA | CATTGTACAG | GAGGCAGCAA | TCAGCACCA  | 1430          |
| BovB_Gv-RTE-Gehyra_variegata   | AGACAGAGCA  | C-CTGAAGAA | CTATGGACGG | AAGTTCGTGA | CATTGTACAG | GAGGCAGCAA | TCAGCATCA  | 1355          |
| BovB_PMo-RTE-Python_molurus    | AGACAGAGTG  | C-CTGAAGAA | CTATGGACGG | AGGTCCGTAA | CATTGTACAG | GAGGCAGCAA | CTAAAACCA  | 1296          |
| BovB_Oa-RTE-Ovis_aries         | AGACAGAGTG  | C-CTGAAGAA | CTATGGACAG | AGTTCATAA  | CATTGTACAG | GAGGCAGTGA | TCAAAACCA  | 1320          |
| BovB-RTE-Bos_taurus            | AGATAGAGTG  | C-CTGATGAA | CTATGGAATG | AGTTCGTGA  | CATTGTACAG | GAGACAGGGA | TCAGACCA   | 1918          |
| BovB_Me-RTE-Macropus_eugenii   | AGATAAAGTG  | C-CTGAAGAA | CTATGGACAG | AAGTTCCTAA | TATTTTATAA | GGAGCAGCAG | A-AAAAACA  | 1171          |
| BovB_Ano-RTE-Amphibolurus_norr | GGACAGAGTG  | C-CTGAAGAA | CTTTGGATAG | AGGCTCGTAA | CATTGTACAG | GAGGCAGCAA | CAAAAACCA  | 1367          |
| BovB_Gd-RTE-Eremiascincus_doug | AGACAGAGTG  | C-CTGAAGAA | CTTTGGATGG | AGGTCTGTAA | CATTGTACAG | GAGGCAGCAA | CTAAAACCA  | 954           |
| BovB_Er-RTE-Eremiascincus_rich | AGACAGAGTG  | C-CTGAAGAA | CTTTGGACGG | AGGTCTGTAA | CATTGTACAG | GAGGCAGCAA | CTAAAACCA  | 1490          |
| BovB_Ca-RTE-Ctenotus_atlas     | AGACAGAGTG  | C-CTGAAGAA | CTTTGGACGG | AGGTCTGTAA | CATAGTACAG | GAAGCAGCAA | CTAAAACCA  | 1483          |
| BovB_Es-RTE-Egernia_stokesii   | AGACAGAGTA  | C-CTGAAGAA | CTATGGATGG | AGGCTTGCAA | CATTGTTCAG | GAGGTAGCAA | CTAGAACTAG | 1317          |
| BovB_Tr-RTE-Tiliqua_rugosa     | AGACAGAGTG  | C-CTGAAGAA | CTGTGGACAG | AGGCTCGCAA | CTTTGTTTCA | GAGGTGGCAA | CTGGAACCA  | 1328          |
| BovB_ALI-RTE-Amblyomma_limbatu | AGACAGAGGG  | C-CTGAATAA | CTATGAACGG | AGTTCGAAA  | CATTGTACAA | GAGGCAGAAA | CTAAAACAT  | 1453          |
| BovB_Hs-RTE-Hydrophis_spiralis | -----       | -----      | -----      | -----      | -----      | -----      | -----      | -----         |
| BovB_VA-RTE-Vipera_ammodytes   | AGACAGAGTG  | C-CTGAAGAA | CTATGGACAG | AGTTCGCAA  | CATTGTATAA | GAGGTAGCAA | CTAAAACCAT | 1289          |
| BovB_ACo-RTE-Agkistrodon_conto | AGACAGAGTG  | C-CTGAAGAA | CTATGGACGG | AGTTCGCAA  | CATTGTACAA | GAGGTAGCAA | CTAAAACCAT | 1289          |
| BovB_Pg-RTE-Perameles_gunnii   | -----       | -----      | -----      | -----      | -----      | -----      | -----      | -----         |
| BovB_lo-RTE-Isodon_obesulus    | -----       | -----      | -----      | -----      | -----      | -----      | -----      | -----         |
| BovB_Bp-RTE-Burramys_parvulus  | -----       | -----      | -----      | -----      | -----      | -----      | -----      | -----         |
| BovB_Pb-RTE-Petaurus_breviceps | -----       | -----      | CTAC       | TATCATCAAG | AGGTATCTTA | ATTCTTCACT | TTCTGCCATC | AAAGTGGTAT 54 |
| BovB_Ma-RTE-Macropus_antilopin | GTAGAGAGAG  | T-GCCTGAAG | AACTATGGAC | AGAGGTTTCA | CAATATTGCA | CAGGAGACAG | CAACAAAAAA | 1411          |
| BovB_Af-RTE-Antechinus_flavipe | GGTCAATGAA  | T-AGATTTAA | GGGATTAGAT | CTGGCAGGTA | GAATATCTGG | GAAATAAGGA | CAGAGGTTTG | 611           |
| BovB_Ac-RTE-Anolis_carolinensi | AAATAGAAATC | C-CAGAAGAA | CTATGGACAG | AAGTCCACAA | CATTGTTCAG | GAGGCAGCAA | CAAAATACA  | 1253          |
| BovB_BM-RTE-Bombyx_mori        | CCAGTGAGTC  | CGCCGAAGGG | CTGTGGCAG  | CGGCTGAAAT | CATCTATTGC | ATCGGCCGTC | TCAGAAACA  | 1113          |
| BovB_Dr-RTE-Christinus         | TGAAAGAGCT  | C-CAGATGAA | CTATGGGAA  | GAGATAAAAT | TG--ATCAT  | AATGGATACA | GCAGAAGGAT | 1153          |
| BovB_La-RTE-Loxodonta_africana | CGACCGAAGA  | C-CAGACAAG | TTGTGGAAT  | GACATCAAGG | ACATCATACA | TGAAGAAAGC | CAAGAGACCA | 1285          |
| BovB_Pc-RTE-Procavia_capensis  | TGACCGAAGA  | C-CAGATGAA | TTGTGGAAT  | GACATCAAGG | ACATCATCCA | TGAAGAGAGC | -AAGAGGTC  | 1285          |
| BovB_Et-RTE-Christinus         | TGACAGAAAG  | C-CTGATGAG | CTGTGGGGGA | GACATCAAGA | CCATCATTCA | AGAAGAAAGC | TAA-AGGTCA | 1125          |
| BovB-Ta-RTE-Tachyglossus_acule | AGACAAGGAA  | C-CAGAGGAA | ATGTGGACG  | GAGATTAATA | ATGTCATCAA | GGAAGAAAGT | GACACAGTAT | 1423          |
| BovB_Plat-RTE-Ornithorhynchus  | AGACAAGGAA  | C-CAGAGAA  | ATGTGGACG  | GAGATTAATA | ATGTCATCAA | GGAAGAAAGC | GACACGGTAT | 1412          |
| BovB_Ec-RTE-Equus_caballus     | TGACCAAGAA  | C-CAGAAGAA | CTATGGACT  | GAAACCAGAA | ATATTATTA  | GGAAGAAATG | GAAAAGACAA | 1182          |
| BovB_Cg-RTE-Christinus         | TGAAAAAGAA  | C-TGGAAGAA | CTATGGTTT  | AAAACCAGAA | AAATTATTA  | AGAACAATGC | ACTAAA-AA  | 770           |
| BovB_Bh-RTE-Bothriocroton_hydr | -----       | -----      | -----      | -----      | -----      | -----      | -----      | -----         |
| BovB_MI-RTE-Gehyra_variegata   | -----       | -----      | -----      | -----      | -----      | -----      | -----      | -----         |
| Sly-rnd1_family284-LINE/RTEBov | -----       | -----      | -----      | -----      | -----      | -----      | -----      | -----         |
| Sly-rnd5_family2019-LINE/RTEBo | -----       | -----      | -----      | -----      | -----      | -----      | -----      | -----         |
| Sly-rnd3_family322-LINE/RTEBov | -----       | -----      | -----      | -----      | -----      | -----      | -----      | -----         |
| Sly-rnd5_family1698-LINE/RTEBo | -----       | -----      | -----      | -----      | -----      | -----      | -----      | -----         |
| Sly-rnd1_family795-LINE/RTEBov | -----       | -----      | -----      | -----      | -----      | -----      | -----      | -----         |
| Stu-rnd-5_family-3162_LINE_RTE | GGGT CATGTC | NTCGGTTGAG | GCCGAGGGCG | AGGGGAAGTA | GGGGTAAGTG | GGTTACGGGT | TCTCNTAAGN | 909           |
| Sly-rnd6_family1960-LINE/RTEBo | GATT--TGCA  | GCNCGNACGG | GGCGGGGGCG | AGGGTGTTAA | GAGG-----G | TACCAAGGGA | GATCCTAGGT | 88            |
| Stu-rnd-5_family-2493_LINE_RTE | -----       | -----      | -----      | -----      | -----      | -----      | -----      | -----         |
| Sly-rnd5_family447-LINE/RTEBov | -----       | -----      | -----      | -----      | -----      | -----      | -----      | -----         |
| Stu-rnd-6_family-2093_LINE_RTE | -----       | -----      | -----      | -----      | -----      | -----      | -----      | -----         |
| Consensus                      | -----       | -----      | -----      | -----      | -----      | -----      | -----      | -----         |
| Conservation                   | 0%          | 100%       | 0%         | 100%       | 0%         | 100%       | 0%         | 100%          |

|                                | 2,120       | 2,140        | 2,160       |            |             |            |                  |
|--------------------------------|-------------|--------------|-------------|------------|-------------|------------|------------------|
| Stu-rnd-1_family-417_LINE_RTE  | -----       | -----        | -----       | -----      | -----       | -----      | -----            |
| Sly-rnd1_family377-LINE/RTEBov | -----       | -----        | -----       | -----      | -----       | -----      | -----            |
| Stu-rnd-1_family-489_LINE_RTE  | -----       | -----        | -----       | -----      | -----       | -----      | -----            |
| Stu-rnd-1_family-607_LINE_RTE  | -----       | -----        | -----       | -----      | -----       | -----      | -----            |
| Stu-rnd-1_family-645_LINE_RTE  | -----       | -----        | -----       | -----      | -----       | -----      | -----            |
| Sly-rnd4_family81-LINE/RTEBovB | -----       | -----        | -----       | -----      | -----       | -----      | -----            |
| Stu-rnd-6_family-408_LINE_RTE  | -----       | -----        | -----       | -----      | -----       | -----      | -----            |
| Stu-rnd-1_family-351_LINE_RTE  | -----       | -----        | -----       | -----      | -----       | -----      | -----            |
| Stu-rnd-1_family-382_LINE_RTE  | -----       | -----        | -----       | -----      | -----       | -----      | -----            |
| Sly-rnd6_family746-LINE/RTEBov | -----       | -----        | -----       | -----      | -----       | -----      | -----            |
| Stu-rnd-5_family-325_LINE_RTE  | -----       | -----        | -----       | -----      | -----       | -----      | -----            |
| Sly-rnd4_family509-LINE/RTEBov | -----       | -----        | -----       | -----      | -----       | -----      | -----            |
| Stu-rnd-1_family-513_LINE_RTE  | -----       | -----        | -----       | -----      | -----       | -----      | -----            |
| Sly-rnd5_family1442-LINE/RTEBo | -----       | -----        | -----       | -----      | -----       | -----      | -----            |
| BovB_GI-RTE-Gehyra_lazelli     | --TCCCAAAG  | AAACAGAAAC   | ACAAGAAAGC  | AAA-GTGGCT | GTCTGAGGAG  | GACTTACAAA | TAGCAGAGGA 1497  |
| BovB_Gv-RTE-Gehyra_variegata   | --TCCCAAAG  | AAACAGAAAC   | ACAAGAAAGC  | AAAAGTGGCT | GTCTGAGGAG  | GCTTTACAAA | TAGCAGAGGA 1423  |
| BovB_PMo-RTE-Python_molurus    | --TCCCAAAG  | AAAAAGAAAT   | GCAAGAAAGC  | AAA-ATGGCT | GTCTGATGAG  | GCTTTACAAA | TAGCTGTGGA 1363  |
| BovB_Oa-RTE-Ovis_aries         | --TCCCAAAG  | AAAAAGAAAT   | GCAAGAAAGC  | AAA-ATGGTT | GTCTGAGGAG  | GCCTTACAAA | TAGCTGAGAA 1387  |
| BovB-RTE-Bos_taurus            | --TCCCCATG  | GAAAAGAAAT   | GCAAGAAAGC  | AAA-ATGGCT | GTCTGGGGAG  | GCCTTACAAA | TAGCTGTGAA 1985  |
| BovB_Me-RTE-Macropus_eugenii   | --AACAAACC  | CCAAAAAGAT   | TCCAAGAAAG  | AAG-AAGAGC | AAG-AATGAG  | GCCTTACAAA | TAGCTGAGGA 1237  |
| BovB_Ano-RTE-Amphibolurus_norr | --TCCCAAAG  | AAAAAGAAAG   | GCAAGAAAGC  | AAA-GTGGCT | GTCCAATGAG  | GCCTTACAAA | TAGCAGAGAA 1434  |
| BovB_Gd-RTE-Eremiascincus_doug | --TCCCAAAG  | AGAAAGAAAT   | GCAAGAAAGC  | AAA-GTGGCT | GTCTGACGAG  | GCTTTACAAA | TAGCTGAGGA 1021  |
| BovB_Er-RTE-Eremiascincus_rich | --TCCCAAAG  | AGAAAGAAAT   | GCAAGAAAGC  | AAA-GTGGCT | GTCTGATGAG  | GCTTTACAAA | TAGCTGAGGA 1557  |
| BovB_Ca-RTE-Ctenotus_atlas     | --TCCCAAAG  | AGAAAGAAAT   | GCAAGAAAGC  | AAA-GTGGCT | ATCTGAGGAG  | GCTTTACAAA | TAGCTGAGGA 1550  |
| BovB_Es-RTE-Egernia_stokesii   | AAATCCCTAAG | GAAAAGAAAT   | GCAAGAAAGC  | AAA-ATGGCT | GTCTGAAGAA  | GCTGTAGGAA | TTGCTGAGGA 1386  |
| BovB_Tr-RTE-Tiliqua_rugosa     | --TCCCTAAG  | GAGAAGAAAT   | GCAAGAAAGC  | AAA-ATGGCT | GTCTGAAGAA  | GCTTTACAAA | TTGCTGAGGA 1395  |
| BovB_ALi-RTE-Amblyomma_limbatu | --ACCAAAC   | AAAAAATAAT   | GCAAGAAAGC  | AAA-ATGGCT | GTCTGAGAAA  | GCTTTACAAA | TAGCTGAGGA 1520  |
| BovB_Hs-RTE-Hydrophis_spiralis | -----       | -----        | -----       | -----      | -----       | -----      | -----            |
| BovB_VA-RTE-Vipera_ammodytes   | --CCCAAAG   | AAAAAGAAAT   | GCAAGAAAGC  | AAA-ATGGCT | GTCTGAGGAA  | GCTTTGCAAA | TAGCTGACGA 1355  |
| BovB_ACo-RTE-Agkistrodon_conto | --CCCAAAG   | AAAAAGAAAT   | GCAAGAAAGC  | AAA-ATGGCT | GTCTGAGGAA  | GCTTTGCAAA | TAGCTGAGGA 1355  |
| BovB_Pg-RTE-Perameles_gunnii   | -----       | -----        | -----       | -----      | -----       | -----      | -----            |
| BovB_lo-RTE-Isodon_obesulus    | -----       | -----        | -----       | -----      | -----       | -----      | -----            |
| BovB_Bp-RTE-Burramys_parvulus  | -----       | -----AGAAGA  | GCAAGAAAGC  | AAAATGATGA | TTGTTTTA--  | GCTTTGCAAA | TAGTGGAGGA 54    |
| BovB_Pb-RTE-Petaurus_breviceps | CATCTCCAAA  | TCTGAGATTA   | CTGATCTTT   | TCTGGCAAC  | CTTAATTACT  | GGGTTAAAC  | TGAGGAAAGA 124   |
| BovB_Ma-RTE-Macropus_antilopin | CATTCCAAA   | AAAAAGAAAT   | GCAAGAAAGC  | AAAATGGCTG | TCTGAAGAG-  | GCTTTACAAA | TAGCTGAAGA 1480  |
| BovB_Af-RTE-Antechinus_flavipe | CAATATTGTA  | CAGGAGGCAA   | CAACAAAAA   | AACATTTCAA | AGAAAAAAA   | AGCAAGAAAG | CAATAGCTGA 681   |
| BovB_Ac-RTE-Anolis_carolinensi | --TCCCAAAG  | AAAAAGAAAT   | CCAAGAAAGC  | AAG-ATGGTT | GTCTGCTGAG  | ACACTGGAAG | TAGCCCAAGA 1320  |
| BovB_BM-RTE-Bombyx_mori        | GTGCCTAAAC  | AAGCAAAACA   | --AAAAAGAT  | CTATGTGGAT | TTCAAACGAT  | ACATGGGAAT | TGATTTGAACG 1181 |
| BovB_Dr-RTE-Christinus         | GCATCCCCTA  | TAGGAAATCA   | GCAAGAAAGC  | CACCATGGCT | CTCAGACTCA  | TGATTTGAAA | TAGCCAAATA 1223  |
| BovB_La-RTE-Loxodonta_africana | TTAAAAAGAC  | AGGAAAGAAA   | --GAAAAGAC  | CAAAATGGAT | GTCAAGAGAG  | ACTCTGAAAC | TTGCTCTTGA 1353  |
| BovB_Pc-RTE-Procavia_capensis  | TTAAAAAGAC  | AGGAAAGAAA   | --GAAAAGAC  | CAAAATGGAT | GTCAAGAGAG  | ACTCTGAAAC | TTGCTCTTGA 1353  |
| BovB_Et-RTE-Christinus         | TTAAAA-GAC  | AGGAAAGAAA   | --GAAAAGGT  | CAAAGCAGAT | GTCAAGAAAG  | ACTTGGAG-- | TTGCTCTTAA 1190  |
| BovB-Ta-RTE-Tachyglossus_acule | TGCAAAAGGT  | CAGGAAGCA-   | --GAAAAGAC  | CAAAATGGAT | GTCAAACATA  | ACTCTGGAAG | TAGCCAAAAA 1490  |
| BovB_Plat-RTE-Ornithorhynchus  | TGCAAAAGGT  | CAGGAAGAA-   | --GAAAAGAC  | CAAAATGGAT | GTCAAGACATA | ACTCTGGAAG | TAGCCAGAAA 1479  |
| BovB_Ec-RTE-Equus_caballus     | TGCCTGAAGT  | AAAAAGAAAT   | --GAAAAAT   | CAAGATGGAT | GACAGAAAG   | ACACTAAAAA | TTGTTAAGGA 1249  |
| BovB_Cg-RTE-Christinus         | TTCTGTAGT   | AAAAATAAAA   | --GAAAAAA   | CAAGATGGAT | GTCTGATGAA  | ACTATTAATA | TTGTTAAGGA 837   |
| BovB_Bh-RTE-Bothriocroton_hydr | -----       | -----        | -----       | -----      | -----       | -----      | -----            |
| BovB_MI-RTE-Gehyra_variegata   | -----       | -----        | -----       | -----      | -----       | -----      | -----            |
| Sly-rnd1_family284-LINE/RTEBov | -----       | -----        | -----       | -----      | -----       | -----      | -----            |
| Sly-rnd5_family2019-LINE/RTEBo | -----       | -----        | -----       | -----      | -----       | -----      | -----            |
| Sly-rnd3_family322-LINE/RTEBov | -----       | -----        | -----       | -----      | -----       | -----      | -----            |
| Sly-rnd5_family1698-LINE/RTEBo | -----       | -----        | -----       | -----      | -----       | -----      | -----            |
| Sly-rnd1_family795-LINE/RTEBov | -----       | -----        | -----       | -----      | -----       | -----      | -----            |
| Stu-rnd-5_family-3162_LINE_RTE | TGAGGGTAGG  | GTCTNTGAAAC  | ATAGGTTTCGT | TGACGGGGAA | GTCCATAGAG  | CTAGTGAAGA | TTCTCAAGAA 979   |
| Sly-rnd6_family1960-LINE/RTEBo | TGAGAGTTGG  | GTCTTGAAAC   | ATAGGNGCGT  | TGACGAGGAA | GTCCATAGAG  | TTAGTGAAGA | TTCTTATGAA 158   |
| Stu-rnd-5_family-2493_LINE_RTE | -----       | -----        | -----       | -----      | -----       | -----      | -----            |
| Sly-rnd5_family447-LINE/RTEBov | -----       | -----        | -----       | -----      | -----       | -----      | -----            |
| Stu-rnd-6_family-2093_LINE_RTE | -----       | -----        | -----       | -----      | -----       | -----      | -----            |
| Consensus                      | -----A----- | -----A-AA--- | -A-----GG-- | -T-----    | -----T-AA-  | T-----A    |                  |

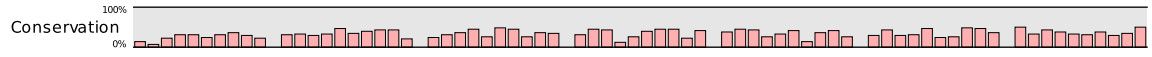

|                                | 2,180       | 2,200       | 2,220      | 2,240      |            |            |             |       |
|--------------------------------|-------------|-------------|------------|------------|------------|------------|-------------|-------|
| Stu-rnd-1_family-417_LINE_RTE  | -----       | -----       | -----      | -----      |            |            |             |       |
| Sly-rnd1_family377-LINE/RTEBov | -----       | -----       | -----      | -----      |            |            |             |       |
| Stu-rnd-1_family-489_LINE_RTE  | -----       | -----       | -----      | -----      |            |            |             |       |
| Stu-rnd-1_family-607_LINE_RTE  | -----       | -----       | -----      | -----      |            |            |             |       |
| Stu-rnd-1_family-645_LINE_RTE  | -----       | -----       | -----      | -----      |            |            |             |       |
| Sly-rnd4_family81-LINE/RTEBovB | -----       | -----       | -----      | -----      |            |            |             |       |
| Stu-rnd-6_family-408_LINE_RTE  | -----       | -----       | -----      | -----      |            |            |             |       |
| Stu-rnd-1_family-351_LINE_RTE  | -----       | -----       | -----      | -----      |            |            |             |       |
| Stu-rnd-1_family-382_LINE_RTE  | -----       | -----       | -----      | -----      |            |            |             |       |
| Sly-rnd6_family746-LINE/RTEBov | -----       | -----       | -----      | -----      |            |            |             |       |
| Stu-rnd-5_family-325_LINE_RTE  | -----       | -----       | -----      | -----      |            |            |             |       |
| Sly-rnd4_family509-LINE/RTEBov | -----       | -----       | -----      | -----      |            |            |             |       |
| Stu-rnd-1_family-513_LINE_RTE  | -----       | -----       | -----      | -----      |            |            |             |       |
| Sly-rnd5_family1442-LINE/RTEBo | -----       | -----       | -----      | -----      |            |            |             |       |
| BovB_GI-RTE-Gehyra_lazelli     | AAGAAAAAAA  | GCAAAA--GG  | CAAAGGTGAA | AAGGAAAGAT | TTAC--ACAA | CTGAATG-CA | GATTCCAGA   | 1562  |
| BovB_Gv-RTE-Gehyra_variegata   | AAGAAGGAAA  | GCAAAA--GG  | CAAAGGTGAA | AAGGAAAGAT | TTAC--CCAA | CTGAATG-CA | GATTCCAGA   | 1489  |
| BovB_PMo-RTE-Python_molurus    | AAGAAGGAAT  | GCGAAA--AG  | CAAGGGTGAA | AGGGAAAGAT | ATAA--GCAA | CTGAATG-CA | GATTCCAGA   | 1428  |
| BovB_Oa-RTE-Ovis_aries         | AAGAAGAGAA  | GCGAAA--GG  | CAAAGGAGAA | AAGGAAAGAT | ATAC--CCAT | CTGAATG-CA | GAGTTCCAAA  | 1452  |
| BovB-RTE-Bos_taurus            | AAGAAGAGAA  | GCGAAA--AG  | CAAAGGAGAA | AAGGAAAGAT | ATAA--ACAT | CTGAATG-CA | GAGTTCCAAA  | 2050  |
| BovB_Me-RTE-Macropus_eugenii   | AAGAAGGAAA  | GGGAAA--GG  | GAAAGGAGAA | AGGGAACAAT | ATAC--CTAA | CTGAATG-CA | GAATTCCAGA  | 1302  |
| BovB_Ano-RTE-Amphibolurus_norr | GAGAAGGGAA  | GCAAAA--TG  | CAAGGGAGAT | AGGGAAAGTT | ACAG--AAAA | TTGAATG-CA | GACTTCCAAA  | 1499  |
| BovB_Gd-RTE-Eremiascincus_doug | AAGAAGGGAA  | GCCAAA--AG  | CAAGGGAGAA | AGGGAAAGAT | ATAG--CCAA | CTGAATG-CA | GATTTCAGAA  | 1086  |
| BovB_Er-RTE-Eremiascincus_rich | AAGAAGGGAA  | GCCAAA--AG  | CAAGGGAGAA | AGGGAAAGAT | ATAG--CCAA | CTGAATG-CA | GATTTCAGAA  | 1622  |
| BovB_Ca-RTE-Ctenotus_atlas     | AAGAAGGGAA  | GCCAAA--AG  | CAAGGGAGAA | AGGGAAAGAT | ATAG--CCAA | CTGAATG-CA | GATTTCAGAA  | 1615  |
| BovB_Es-RTE-Egernia_stokesii   | AAGAAGGAAA  | GCAAAA--GG  | CAAGGGAGAA | AGGGAAAGAT | ATATACCCAA | CTGAATG-CA | GATTTCAGAA  | 1453  |
| BovB_Tr-RTE-Tiliqua_rugosa     | AAGAAGGAAA  | GCAAAA--GG  | CAAGGGAGAA | AGGGAAAGAT | ATAT--CCAA | CTGAATG-CA | GATTTCAGAA  | 1460  |
| BovB_ALi-RTE-Amblyomma_limbatu | AAAAAAGTAA  | GCAAAA--GG  | CAAGGAAGAA | AAAGAAAGAT | ACTAAACAAT | TAGATGACA  | GAATTCCACA  | 1589  |
| BovB_Hs-RTE-Hydrophis_spiralis | -----       | -----       | -----      | -----      | -----      | -----      | -----       | ----- |
| BovB_VA-RTE-Vipera_ammodytes   | AAGGAGGGAA  | GCGAAA--GG  | CAAGGGAGAA | AAAGAAATTT | AC--GCCCAA | TTGAATG-CA | GAATTCCAGA  | 1420  |
| BovB_ACo-RTE-Agkistrodon_conto | AAGAAGGGAA  | GCGAAA--GG  | CAAAGGAGAA | AGAGAAAGAT | AC--ACCCAA | TTGAATG-CA | GAATTCCAGA  | 1420  |
| BovB_Pg-RTE-Perameles_gunnii   | -----       | -----       | -----      | -----      | -----      | -----      | -----       | ----- |
| BovB_lo-RTE-Isodon_obesulus    | -----       | -----       | -----      | -----      | -----      | -----      | -----       | ----- |
| BovB_Bp-RTE-Burramys_parvulus  | AAGAAGTAA   | ATGAAAGGGA  | AAGGAGAAAG | GGAAAAATAT | GCCAGACCAA | CTGAATG-CA | AAATTCCAAA  | 123   |
| BovB_Pb-RTE-Petaurus_breviceps | AGGAAAAGAC  | A-AAAGGGAA  | AAAAATAAAA | GGAAAGATAT | AC--CCAA   | GTGAATG-CA | GAATTCTAGA  | 188   |
| BovB_Ma-RTE-Macropus_antilopin | AACAAGGAAA  | AGAAAAGGTA  | AAAGAGAAAA | GGAAAGATAA | AC--CCAA   | CTGAATG-CA | GAATTCCAGA  | 1545  |
| BovB_Af-RTE-Antechinus_flavipe | AGTAACAATA  | GCTGAAGAAA  | AAAAGGAGAA | AGGGAAAGTT | AT--ATCTAA | CTGAATG-CA | GAATTCTAAA  | 748   |
| BovB_Ac-RTE-Anolis_carolinensi | AAGAAGAAA   | ACGAAAAGGAA | ACAGCAATGG | GGAGGGGGAG | ATATGCACAA | TTAAATG-CA | CAATACCAGA  | 1389  |
| BovB_BM-RTE-Bombyx_mori        | CAGAAAAGAAC | TTGCAAG-GA  | T-CAGATAAA | ATTGAAAAC  | ACAA--TGCA | CTCAGTA-AA | GACATAAAAC  | 1246  |
| BovB_Dr-RTE-Christinus         | GAGACGGAAC  | AGCCAAA-GC  | CACTGGCAAG | AGTTTTGAAT | TCAG--ATCT | CTAAATG-CA | GAATTTCAAC  | 1289  |
| BovB_La-RTE-Loxodonta_africana | ACG-TCGAGC  | AGCTAAA-GC  | AAAAGGAAGA | AATGATGAAG | TAAA--AGAA | CTGAACA-GA | AGATTTCAA   | 1418  |
| BovB_Pc-RTE-Procavia_capensis  | ATG-TCGAGC  | AGCTAAA-GC  | AAAAGGAAGG | AATGGCGAAG | TAAA--AGAC | CTAAACA-GA | AGATTTCAA   | 1418  |
| BovB_Et-RTE-Christinus         | TTG-TAGAGT  | TGCTAAA-GC  | AAATGGAAGA | AACAATGAAG | TCAA--GGAG | CTGAACA-GA | ACATTTCAA   | 1255  |
| BovB-Ta-RTE-Tachyglossus_acule | AAG-GAAGGA  | AGCAAAA-AT  | CAGAGGACAA | AAGAACCTGG | TTAA--AGAA | CTGAGCC-GA | GAATTCAGC   | 1555  |
| BovB_Plat-RTE-Ornithorhynchus  | AAG-GAAGGA  | AGCAAAA-AT  | CAGAGGACAA | AAGAACCTGG | TTAA--AGAA | CTGAGCC-GA | GAATTCAGC   | 1544  |
| BovB_Ec-RTE-Equus_caballus     | CAGGTAAGAA  | GCAAAAAG-TA | AAA-GGTGAC | AAAAGCAGGG | TTAG--AATC | CTGAATG-CA | GTTTTTCAGC  | 1314  |
| BovB_Cg-RTE-Christinus         | TAGACAAGAA  | GCAAAAAG-TA | AAAAGGTGAC | AAAAACAGG  | ----AAAT   | CTAAATG-AA | GTATTTTCAGC | 898   |
| BovB_Bh-RTE-Bothriocroton_hydr | -----       | -----       | -----      | -----      | -----      | -----      | -----       | ----- |
| BovB_MI-RTE-Gehyra_variegata   | -----       | -----       | -----      | -----      | -----      | -----      | -----       | ----- |
| Sly-rnd1_family284-LINE/RTEBov | -----       | -----       | -----      | -----      | -----      | -----      | -----       | ----- |
| Sly-rnd5_family2019-LINE/RTEBo | -----       | -----       | -----      | -----      | -----      | -----      | -----       | ----- |
| Sly-rnd3_family322-LINE/RTEBov | -----       | -----       | -----      | -----      | -----      | -----      | -----       | ----- |
| Sly-rnd5_family1698-LINE/RTEBo | -----       | -----       | -----      | -----      | -----      | -----      | -----       | ----- |
| Sly-rnd1_family795-LINE/RTEBov | -----       | -----       | -----      | -----      | -----      | -----      | -----       | ----- |
| Stu-rnd-5_family-3162_LINE_RTE | GAGGAAGATA  | AATATAGCTT  | GTGTCAGGGA | GACCAGATGG | GTAGGTACCA | AGGCTCGGGA | TGTNGA-CGG  | 1048  |
| Sly-rnd6_family1960-LINE/RTEBo | GAGGAAGATC  | AATATAGCTT  | GTGTCAGGGA | AACCAAATGG | GTAGGAACCA | AGGCCAGGGA | TGTGGAATGG  | 228   |
| Stu-rnd-5_family-2493_LINE_RTE | -----       | -----       | -----      | -----      | -----      | -----      | -----       | ----- |
| Sly-rnd5_family447-LINE/RTEBov | -----       | -----       | -----      | -----      | -----      | -----      | -----       | ----- |
| Stu-rnd-6_family-2093_LINE_RTE | -----       | -----       | -----      | -----      | -----      | -----      | -----       | ----- |
| Consensus                      | --G-----    | ----AA----  | -----G--A- | A--A-----  | -----A-    | -TGAA----  | A---TT--A-- |       |

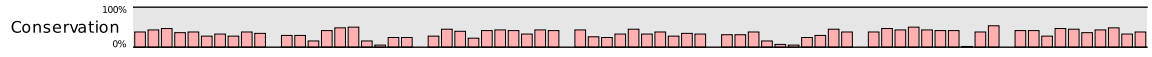

|                                 | 2,260                                                                                                     | 2,280 | 2,300 |       |  |
|---------------------------------|-----------------------------------------------------------------------------------------------------------|-------|-------|-------|--|
| Stu-rnd-1_family-417_LINE_RTE   | -----                                                                                                     | ----- | ----- | ----- |  |
| Sly-rnd1_family377-LINE/RTEBov  | -----                                                                                                     | ----- | ----- | ----- |  |
| Stu-rnd-1_family-489_LINE_RTE   | -----                                                                                                     | ----- | ----- | ----- |  |
| Stu-rnd-1_family-607_LINE_RTE   | -----                                                                                                     | ----- | ----- | ----- |  |
| Stu-rnd-1_family-645_LINE_RTE   | -----                                                                                                     | ----- | ----- | ----- |  |
| Sly-rnd4_family81-LINE/RTEBovB  | -----                                                                                                     | ----- | ----- | ----- |  |
| Stu-rnd-6_family-408_LINE_RTE   | -----                                                                                                     | ----- | ----- | ----- |  |
| Stu-rnd-1_family-351_LINE_RTE   | -----                                                                                                     | ----- | ----- | ----- |  |
| Stu-rnd-1_family-382_LINE_RTE   | -----                                                                                                     | ----- | ----- | ----- |  |
| Sly-rnd6_family746-LINE/RTEBov  | -----                                                                                                     | ----- | ----- | ----- |  |
| Stu-rnd-5_family-325_LINE_RTE   | -----                                                                                                     | ----- | ----- | ----- |  |
| Sly-rnd4_family509-LINE/RTEBov  | -----                                                                                                     | ----- | ----- | ----- |  |
| Stu-rnd-1_family-513_LINE_RTE   | -----                                                                                                     | ----- | ----- | ----- |  |
| Sly-rnd5_family1442-LINE/RTEBo  | -----                                                                                                     | ----- | ----- | ----- |  |
| BovB_GI-RTE-Gehyra_lazelli      | GAACAGCAAG AAGAGATAAG GAGGCCATT-- CATGAACGAA CAGTG---CA AAGTAACAGA GGAAAAACAAT 1627                       |       |       |       |  |
| BovB_Gv-RTE-Gehyra_variegata    | GAACAGCAAG AAGAGATAAG GAGGCCATT-- CATGAACGAA GAGTG---CA AAGTAATAGA GGAAAAACAAT 1554                       |       |       |       |  |
| BovB_PMo-RTE-Python_molurus     | GAATAGCAAG GAGAGATAAG AAGGCCCTT-- CTTAAATGAA CAATG---CA AAGAAATCGA GGAAAAACAAT 1493                       |       |       |       |  |
| BovB_Oa-RTE-Ovis_aries          | GAATAGCAAG GAGAGATAAG AAAGCCCTT-- CCTCAGTGAA CAATG---CA AAGAAATAGA GGAAAAACAAT 1517                       |       |       |       |  |
| BovB-RTE-Bos_taurus             | GAATAGCAAG AAGAGATAAG AAAGCCCTT-- CTTACGCGAT CAATG---CA AAGAAATAGA GGAAAAACAAC 2115                       |       |       |       |  |
| BovB_Me-RTE-Macropus_eugenii    | GAATAGCAGG AAGAGATAAG AACATTTT-- CTTAAATAA CAATG---CG ATGAAATAGA AGAAAAACAAT 1367                         |       |       |       |  |
| BovB_Ano-RTE-Amphibolurus_norr  | GAATAGCAAG GAGAGACAAG AGGGCCCTT-- CTTAAATGAA CAATG---CA AAGAAATAGA GGAAAAATAAC 1564                       |       |       |       |  |
| BovB_Gd-RTE-Eremiascincus_doug  | GAACAGCAAG GAGAGATAGG AAGGCCCTT-- CCTAAATGAG CAATG---CA AAGAAATAGA GGAAAAACAAT 1151                       |       |       |       |  |
| BovB_Er-RTE-Eremiascincus_rich  | GAACAGCAAG GAGAGATAGG AAGGCCCTT-- CTTAAATGAG CAATG---CA AAGAAATAGA GGAAAAACAAT 1687                       |       |       |       |  |
| BovB_Ca-RTE-Ctenotus_atlas      | GAACAGCAAG GAGAGATAGG AAGGCCCTT-- CTTAAATGAG CAATG---CA AAGAAATAGA GGAAAAACAAT 1680                       |       |       |       |  |
| BovB_Es-RTE-Egernia_stokesii    | GAATAGCAGG GAGAGATAGG AATGCCCTT-- CTTAAATGAG CAATG---CA GAGAAATAGA GGCAAAACAAT 1518                       |       |       |       |  |
| BovB_Tr-RTE-Tiliqua_rugosa      | GAATAGCAAG GAGAGATAGG AATGCCCTT-- CTTAAATGAG CAATG---CA GAGAAATAGA GGAAAAACAAT 1525                       |       |       |       |  |
| BovB_ALI-RTE-Amblyomma_limbatu  | GAACAGCTAG AAGAGATAAG AATGTATTTA CTTAAATGAA CAGTAA--CA AAGAAATAG AAGAAATAT 1657                           |       |       |       |  |
| BovB_Hs-RTE-Hydrophis_spiralis  | -----                                                                                                     | ----- | ----- | ----- |  |
| BovB_VA-RTE-Vipera_ammodytes    | CAATAGCTAG AAGAGATAAG AATGCCCTT-- CTTAAATGAA CAGTG---CA AAGAAATAGA AGAAAAACAAT 1485                       |       |       |       |  |
| BovB_ACo-RTE-Agkistrodon_conto  | GAATAGCTAG AAGAGATAAG AATGCCCTT-- CTTAAATGAA CAGTG---CA AAGAAATAGA AGAAAAACAAT 1485                       |       |       |       |  |
| BovB_Pg-RTE-Perameles_gunnii    | -----                                                                                                     | ----- | ----- | ----- |  |
| BovB_lo-RTE-Isodon_obesulus     | AAGGAGAAGA TTAAAAAAAAA AAAGATTT-- CTTAAATGAG CAGTAGAGAA AAA-AATAGA AGAAAAACAAT 111                        |       |       |       |  |
| BovB_Bp-RTE-Burramys_parvulus   | GAATAGAAAG GAGAGATAAA GAGGTTTT-- CTTAAATGAG CAATGC--AA AGA-AATAGA AGAAAAACAAG 188                         |       |       |       |  |
| BovB_Pb-RTE-Petaurus_breviceps  | GAATAGCAAG GAAAGATAA - -GTTTT-- CTTAAATAAG CAATGC--AA AGA-AATAGG AGAAAAATAA 249                           |       |       |       |  |
| BovB_Ma-RTE-Macropus_antilopin  | GAATAGCAAG GAAAGATAAG AAAGTTTT-- CTTAAATGAG CAATGC--AA AGA-AATAGA AGAAAAACA- 1609                         |       |       |       |  |
| BovB_Af-RTE-Antechinus_flavipe  | TAATAACAAA AAGAAATAA - -GGTTAT-- CCTACATGAG CAATGCAAAG AAATAGGAGG GAAAAACCAA 813                          |       |       |       |  |
| BovB_Ac-RTE-Anolis_carolinensis | AGTTAGCCAG AAGAGACAAG GAACTATT-- TTTAAACAAG CAATG---CA TGGAACTGGA AGAAGACAAC 1454                         |       |       |       |  |
| BovB_BM-RTE-Bombyx_mori         | AACGCTGCCG ACGTGACAAG AATATTTT-- CATTGAAAA ATTFTA--TA AAGGAATTGA GTCGCACTCC 1311                          |       |       |       |  |
| BovB_Dr-RTE-Christinus          | GGGAAGCAAG GCGGACAAG GAGCGCTA-- CTGGGATGAG CGGTG---TT CAAAACCTGGA AGCTGCTAGC 1354                         |       |       |       |  |
| BovB_La-RTE-Loxodonta_africana  | GGGCAGCTCG AGAAGACAAA GTAAAGTA-- TTATAATGAC ATGTA---CA AAGACCTGGA GATAGAAAAC 1483                         |       |       |       |  |
| BovB_Pc-RTE-Procavia_capensis   | GAGCAGCTCG AGAAGACAAA AGAAAGTA-- TTATAATGAC ATGTG---CA AAGAGCTGGA AATGGAAAAAC 1483                        |       |       |       |  |
| BovB_Et-RTE-Christinus          | ----- AGGCAAA GCCAAATA-- TTATAACGAA ATGTT---CA CAGACTAGA ATTAGA--- 1303                                   |       |       |       |  |
| BovB_Ta-RTE-Tachyglossus_acule  | GCTCTGCCAG GAAGGACAAA CAGGAATA-- TTATAACAGC ATATG---TA AAGAAATGGA AGTCAATAAC 1620                         |       |       |       |  |
| BovB_Plat-RTE-Ornithorhynchus   | GCTCTGCCAG GAAGGACAAA CAGGAATA-- TTATAACAGC ATATG---TA AAGAAATGGA AGTCAATAAC 1609                         |       |       |       |  |
| BovB_Ec-RTE-Equus_caballus      | GACTGTCCAG TAGAGATAAA GAGAACTA-- CTATAATGGC CAATG---CA AAGAGATAGA AGAAAAACAAC 1379                        |       |       |       |  |
| BovB_Cg-RTE-Christinus          | CACTGGCATG TAGAGACAAA GAGAAATA-- ATATAAAAC CATTG---AA AAGAAATAGA AGAGAAACAAC 963                          |       |       |       |  |
| BovB_Bh-RTE-Bothriocroton_hydr  | -----                                                                                                     | ----- | ----- | ----- |  |
| BovB_MI-RTE-Gehyra_variegata    | -----                                                                                                     | ----- | ----- | ----- |  |
| Sly-rnd1_family284-LINE/RTEBov  | -----                                                                                                     | ----- | ----- | ----- |  |
| Sly-rnd5_family2019-LINE/RTEBo  | -----                                                                                                     | ----- | ----- | ----- |  |
| Sly-rnd3_family322-LINE/RTEBov  | -----                                                                                                     | ----- | ----- | ----- |  |
| Sly-rnd5_family1698-LINE/RTEBo  | -----                                                                                                     | ----- | ----- | ----- |  |
| Sly-rnd1_family795-LINE/RTEBov  | -----                                                                                                     | ----- | ----- | ----- |  |
| Stu-rnd-5_family-3162_LINE_RTE  | GTTTAAGTTG TGGTACTCAG GAGGNTCGAG GGATAGAAAT GGAGTGGGT TA TTTAGTAGA CGGGGATTTG 1118                        |       |       |       |  |
| Sly-rnd6_family1960-LINE/RTEBo  | ATTTAAGTTG TGGTACTCAG GAGGATCGAG GAATAGGAAT GGAGTAGGCA TTTAGTAGA CGGGGAACCT 298                           |       |       |       |  |
| Stu-rnd-5_family-2493_LINE_RTE  | -----                                                                                                     | ----- | ----- | ----- |  |
| Sly-rnd5_family447-LINE/RTEBov  | -----                                                                                                     | ----- | ----- | ----- |  |
| Stu-rnd-6_family-2093_LINE_RTE  | -----                                                                                                     | ----- | ----- | ----- |  |
| Consensus                       | -----G - - - AGA - AA - - - - - T - - - - - AA - - A - - - TG - - - A - - - - A - T - GA - G - AAA - AA - |       |       |       |  |

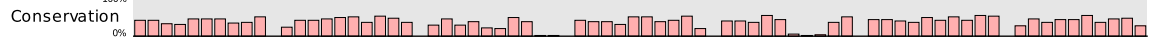



|                                | 2,320                 | 2,340              | 2,360             | 2,380           |                   |                   |                   |       |
|--------------------------------|-----------------------|--------------------|-------------------|-----------------|-------------------|-------------------|-------------------|-------|
| Stu-rnd-1_family417_LINE_RTE   | -----                 | -----              | -----             | -----           | -----             |                   |                   |       |
| Sly-rnd1_family377-LINE/RTEBov | -----                 | -----              | -----             | -----           | -----             |                   |                   |       |
| Stu-rnd-1_family489_LINE_RTE   | -----                 | -----              | -----             | -----           | -----             |                   |                   |       |
| Stu-rnd-1_family607_LINE_RTE   | -----                 | -----              | -----             | -----           | -----             |                   |                   |       |
| Stu-rnd-1_family645_LINE_RTE   | -----                 | -----              | -----             | -----           | -----             |                   |                   |       |
| Sly-rnd4_family81-LINE/RTEBovB | -----                 | -----              | -----             | -----           | -----             |                   |                   |       |
| Stu-rnd-6_family408_LINE_RTE   | -----                 | -----              | -----             | -----           | -----             |                   |                   |       |
| Stu-rnd-1_family351_LINE_RTE   | -----                 | -----              | -----             | -----           | -----             |                   |                   |       |
| Stu-rnd-1_family382_LINE_RTE   | -----                 | -----              | -----             | -----           | -----             |                   |                   |       |
| Sly-rnd6_family746-LINE/RTEBov | -----                 | -----              | -----             | -----           | -----             |                   |                   |       |
| Stu-rnd-5_family325_LINE_RTE   | -----                 | -----              | -----             | -----           | -----             |                   |                   |       |
| Sly-rnd4_family509-LINE/RTEBov | -----                 | -----              | -----             | -----           | -----             |                   |                   |       |
| Stu-rnd-1_family513_LINE_RTE   | -----                 | -----              | -----             | -----           | -----             |                   |                   |       |
| Sly-rnd5_family1442-LINE/RTEBo | -----                 | -----              | -----             | -----           | -----             |                   |                   |       |
| BovB_GI-RTE-Gehyra_lazelli     | AGAA - TGGGA          | AGGACTAGAG         | AC-CTCTTCA        | AGAAAAATCG      | GAGAAATCAA        | GGGAACGTTT        | CAGGGCAA -G       | 1694  |
| BovB_Gv-RTE-Gehyra_variegata   | AGAAATGGGA            | AGGACTAGAG         | AC-CTTTTCA        | AGAAAA - TCG    | GAGAAATCAA        | GGGAACGTTT        | CAGG - CAA -G     | 1620  |
| BovB_PMo-RTE-Python_molurus    | AGAA - TGGGG          | AAGACTAGAG         | AT-CTCTTCA        | AGAAAA - TTG    | GAGATATCAA        | AGGAACGTTT        | - AGTGCAA -A      | 1558  |
| BovB_Oa-RTE-Ovis_aries         | AGAA - TGGGA          | AAGACTAGAG         | AT-CTCTTCA        | AGAAAAATTAG     | A - GATACCAA      | GGGAACATTT        | CATGCAAA -G       | 1583  |
| BovB-RTE-Bos_taurus            | AGAA - TGGGA          | AAGACTAGAG         | AT-CTCTTCA        | AGAAAAATCAG     | A - GATACCAA      | GGGAACATTT        | CATGCAAA -G       | 2181  |
| BovB_Me-RTE-Macropus_eugenii   | AGAA - TGGGA          | AAGATAAGAG         | AT-CTCTTCA        | AGAAAAATTAG     | A - GATA - - - A  | AGATATTTTT        | CATGCAAA -A       | 1430  |
| BovB_Ano-RTE-Amphibolurus_norr | AGAA - AAGGA          | AAAACCAGAG         | AT-CTGTACA        | GGAAAAATTGG     | A - GATATTA       | AGGAACATTT        | TGCGCAAA -G       | 1630  |
| BovB_Gd-RTE-Eremiascincus_doug | AGAA - TGGGA          | AAGACTAGAG         | AT-CTTTTCA        | AGAAAAATAG      | AAGATGTCAA        | AGGACAATTT        | CATGCTAA -G       | 1218  |
| BovB_Er-RTE-Eremiascincus_rich | AGAA - TGGGA          | AAGACTAGAG         | AT-CTTTTCA        | AGAAAAATTGG     | A - GATGTCAA      | AGGACAATTT        | CATGCTAA -G       | 1753  |
| BovB_Ca-RTE-Ctenotus_atlas     | AGAA - TGGGA          | AAGACTAGAG         | AT-CTTTTCA        | AGAAAAATTGG     | A - GATGTCAA      | AGGACAATTT        | CGTGCTAG -G       | 1746  |
| BovB_Es-RTE-Egernia_stokesii   | AGAA - GGGGG          | AAGACTAGAG         | AT-CTCTTCA        | AGAAAAATTGG     | A - GATATCAC      | AGGAACATTT        | CATGTAAA -G       | 1584  |
| BovB_Tr-RTE-Tiliqua_rugosa     | AGAA - GGGGA          | AAGACTAGAA         | AT-CTCTTCA        | AGAAAAATTGG     | A - GATATCAC      | AGGAACATTT        | CATGCAAA -G       | 1591  |
| BovB_ALI-RTE-Amblyomma_limbatu | AGAA - TAGGG          | AGGACCAGAG         | ATACTCTTCA        | AGAAAAATTGG     | A - GATATGAA      | GGGAACATTT        | CATGCAAA -G       | 1724  |
| BovB_Hs-RTE-Hydrophis_spiralis | -----                 | -----              | -----             | -----           | -----             | -----             | -----             | ----- |
| BovB_VA-RTE-Vipera_ammodytes   | AGAA - TAGGG          | AGGACCAGAG         | AT-CTTTTCA        | AGAAAAATTGG     | A - GAGATGAA      | GGGAACGTTT        | CATGCAAA -A       | 1551  |
| BovB_ACo-RTE-Agkistrodon_conto | AGAA - TAGGG          | AGGACCAGAG         | AT-CTCTTCA        | AGAAAAATTGG     | A - GATATGAA      | GGGAACGTTT        | CATGCAAA -G       | 1551  |
| BovB_Pg-RTE-Perameles_gunnii   | -----                 | -----              | -----             | -----           | -----             | -----             | -----             | ----- |
| BovB_lo-RTE-Isodon_obesulus    | AGAATGAGGA            | CAAGCAAGCT         | ACTTCAAAAA        | AAAAAAATTA      | GAGATAGCAA        | AGGAAACTTT        | CATGCAAA -A       | 180   |
| BovB_Bp-RTE-Burramys_parvulus  | TAGAATTGGA            | AAAATGAGA          | - TCTCTTCAA       | GAAAAAAGA       | GATATCA - - -     | - - GAATATTT      | CATGCAAA -A       | 250   |
| BovB_Pb-RTE-Petaurus_breviceps | TAGAATGGGA            | AAGACAAGAA         | ATCTCTTCAA        | GAAAAATTAGA     | GATATCACAG        | GGGAACATTT        | TATGCAAA -A       | 318   |
| BovB_Ma-RTE-Macropus_antilopin | TAGAATGGGA            | AAGAAAAGA          | - TCTCTTCAA       | GAAAAATTAGA     | GATATCA - - A     | GGGAATGTTT        | CACGCAAA -A       | 1674  |
| BovB_Af-RTE-Antechinus_flavipe | CATAATGGGA            | AAGACAAGAG         | ATCTTAGCAA        | GAAAAATTAGA     | AAGATTAT - -      | GAAAAATGTTG       | CATGCTGA -A       | 880   |
| BovB_Ac-RTE-Anolis_carolinensi | AGAA - TAGGA          | AGGACAAGAG         | AC-CTTTTCC        | AGAAAAATCAG     | A - AACATCGG      | AGGCAAAATTT       | CAGGCAAA -A       | 1520  |
| BovB_BM-RTE-Bombyx_mori        | CTAAAGTT - A          | CAATCTCT - CT      | GATTTATTTA        | AGAAAGTTCC      | T - CTGCTGTC      | GAAAAAATAC        | AAAGCA - - -A     | 1375  |
| BovB_Dr-RTE-Christinus         | AAGAAAGG - C          | CACACCC - GT       | GAGCTTTTTG        | ACCATGTGAA      | G - CAGGGGCG      | GGCATCATTT        | GCGCCCGCA         | 1421  |
| BovB_La-RTE-Loxodonta_africana | CAAAAGAA - A          | AGAACAC - GC       | TCAGCATTTT        | TCAAGCTGAA      | A - GAACTGAA      | AAAAAAATTC        | AAGCCTC - - -     | 1547  |
| BovB_Pc-RTE-Procavia_capensis  | CAGAAGGG - A          | AGAACAC - GT       | TCTGCATTTT        | TCAAGCTGAA      | A - GAACTGAA      | AAAAAAATTC        | AAGCCTC - - -     | 1547  |
| BovB_Et-RTE-Christinus         | - - - - GGG - A       | AGAACGT - AC       | - CAGCATACC       | TGAAACGGAA      | A - GACCCAG       | GAAAAAATTC        | AAGCCTC - - -     | 1361  |
| BovB_Ta-RTE-Tachyglossus_acule | AAATGTGG - G          | CGGACAA - GA       | TCACTATTTT        | AGAAGATTAA      | G - GAAATTA       | GGGAACATTT        | CGTCCTT - - -     | 1684  |
| BovB_Plat-RTE-Ornithorhynchus  | AAATGTGG - G          | CGGACAA - GA       | TCACTATTTT        | AGAAGATTAA      | G - GAAATTA       | GGGAACATTT        | CGTCCTC - - -     | 1673  |
| BovB_Ec-RTE-Equus_caballus     | AAAAAAGG - A          | AGAACAA - GA       | GGTCTTTCC         | AGAAGATTCA      | A - GAAATCAA      | AGGCAAAATTT       | AAACCTA - - -     | 1443  |
| BovB_Cg-RTE-Christinus         | AAAAAATGTA            | AGAACAACAA         | AATTGATTAC        | ACAAAAATCA      | A - GAAATCAT      | AATGAAATTT        | AAACCAT - - -     | 1029  |
| BovB_Bh-RTE-Bothriocroton_hydr | -----                 | -----              | -----             | -----           | -----             | -----             | -----             | ----- |
| BovB_MI-RTE-Gehyra_variegata   | ATCATTTAGT            | TTGATTATAT         | ACTTTGCAGT        | CAAAAAATAGA     | AAAGCACTGT        | AAAGTCAGTT        | AAAACCTAG - -     | 97    |
| Sly-rnd1_family284-LINE/RTEBov | -----                 | -----              | -----             | -----           | -----             | -----             | -----             | ----- |
| Sly-rnd5_family2019-LINE/RTEBo | -----                 | -----              | -----             | -----           | -----             | -----             | -----             | ----- |
| Sly-rnd3_family322-LINE/RTEBov | -----                 | -----              | -----             | -----           | -----             | -----             | -----             | ----- |
| Sly-rnd5_family1698-LINE/RTEBo | -----                 | -----              | -----             | -----           | -----             | -----             | -----             | ----- |
| Sly-rnd1_family795-LINE/RTEBov | -----                 | -----              | -----             | -----           | -----             | -----             | -----             | ----- |
| Stu-rnd-5_family3162_LINE_RTE  | AGGGAGCGAG            | TGGTGGAGGT         | TAGGAGGATC        | AATGATAGGN      | TGATGACGAT        | TAAGCTAGTC        | ATTGGTAGGA        | 1188  |
| Sly-rnd6_family1960-LINE/RTEBo | AGGGAGCAAG            | CGGTAGAGGT         | TAGGAGGGTN        | AATGATAGGA      | TGATGATNAT        | TAAGCTAGTC        | GTTGG - AGGG      | 367   |
| Stu-rnd-5_family2493_LINE_RTE  | -----                 | -----              | -----             | -----           | -----             | -----             | -----             | ----- |
| Sly-rnd5_family447-LINE/RTEBov | -----                 | -----              | -----             | -----           | -----             | -----             | -----             | ----- |
| Stu-rnd-6_family2093_LINE_RTE  | -----                 | -----              | -----             | -----           | -----             | -----             | -----             | ----- |
| Consensus                      | - - - A - - - G - - - | A - - AC - A - - - | - - - - - T - - - | - - AAA - - - - | - - - A - - - - - | - - - AA - - TT - | - A - - C - - - - |       |
| Conservation                   |                       |                    |                   |                 |                   |                   |                   |       |

|                                | 2,400      | 2,420      | 2,440       |            |            |             |            |       |
|--------------------------------|------------|------------|-------------|------------|------------|-------------|------------|-------|
| Stu-rnd-1_family-417_LINE_RTE  | -----      | -----      | -----       | -----      | -----      | -----       | -----      | ----- |
| Sly-rnd1_family377-LINE/RTEBov | -----      | -----      | -----       | -----      | -----      | -----       | -----      | ----- |
| Stu-rnd-1_family-489_LINE_RTE  | -----      | -----      | -----       | -----      | -----      | -----       | -----      | ----- |
| Stu-rnd-1_family-607_LINE_RTE  | -----      | -----      | -----       | -----      | -----      | -----       | -----      | ----- |
| Stu-rnd-1_family-645_LINE_RTE  | -----      | -----      | -----       | -----      | -----      | -----       | -----      | ----- |
| Sly-rnd4_family81-LINE/RTEBovB | -----      | -----      | -----       | -----      | -----      | -----       | -----      | ----- |
| Stu-rnd-6_family-408_LINE_RTE  | -----      | -----      | -----       | -----      | -----      | -----       | -----      | ----- |
| Stu-rnd-1_family-351_LINE_RTE  | -----      | -----      | -----       | -----      | -----      | -----       | -----      | ----- |
| Stu-rnd-1_family-382_LINE_RTE  | -----      | -----      | -----       | -----      | -----      | -----       | -----      | ----- |
| Sly-rnd6_family746-LINE/RTEBov | -----      | -----      | -----       | -----      | -----      | -----       | -----      | ----- |
| Stu-rnd-5_family-325_LINE_RTE  | -----      | -----      | -----       | -----      | -----      | -----       | -----      | ----- |
| Sly-rnd4_family509-LINE/RTEBov | -----      | -----      | -----       | -----      | -----      | -----       | -----      | ----- |
| Stu-rnd-1_family-513_LINE_RTE  | -----      | -----      | -----       | -----      | -----      | -----       | -----      | ----- |
| Sly-rnd5_family1442-LINE/RTEBo | -----      | -----      | -----       | -----      | -----      | -----       | -----      | ----- |
| BovB_GI-RTE-Gehyra_lazelli     | GCTGG-CCAC | AATAAA-GGA | CAAAAATGG-  | CAGGGACCTA | ACAG--AAGC | AGAAGAGATC  | AGGAAAAGAT | 1759  |
| BovB_Gv-RTE-Gehyra_variegata   | GCTGGGCCAC | AATAAAAGGA | CAAAAATGGA  | CAGGGACCTA | ACAGT-AAGC | AGAAGAGATC  | AGGAAAAGAT | 1689  |
| BovB_PMo-RTE-Python_molurus    | GATGG-GCAT | GATAAA-GGA | CAAAAAAGG-  | CAGGGACCTA | ACAG--AAGC | AGAAGAGATT  | AAGAAGAGGT | 1623  |
| BovB_Oa-RTE-Ovis_aries         | A-TGG-GCAC | AATAAA-GGA | CAGAAATGG-  | TATGGACCTA | ACAG--AAGC | AGAAGAGATT  | AAGAAGAGGT | 1647  |
| BovB-RTE-Bos_taurus            | A-TGG-GCTC | GATAAA-GGA | CAGAAATGG-  | TATGGACCTA | ACAG--AAGC | AGAAGATATT  | AAGAAGAGAT | 2245  |
| BovB_Me-RTE-Macropus_eugenii   | AATGA-GCAT | GGTAAA--A  | CAAAAATGG-  | TAGGGACTTA | ACAG--AAG- | -----       | -----      | 1472  |
| BovB_Ano-RTE-Amphibolurus_norr | A-TGG-ACAT | GATAAA-GGA | CAAAAATGG-  | GAGGGACCTA | ACAG--AAGC | AGAAGACGTC  | AAGAAGAGGT | 1694  |
| BovB_Gd-RTE-Eremiascincus_doug | G-TGG-GCAC | AATAAA-GGA | CAAGAACGG-  | CAAGGACCTA | ACAG--AAGC | AGATGAGATT  | AAGAAGAGGT | 1282  |
| BovB_Er-RTE-Eremiascincus_rich | G-TGG-GCAC | AATAAA-GGA | CAAGAACGG-  | CAAGGACCTA | ACAG--AAGC | AGATGAGATT  | AAGAAGAGGT | 1817  |
| BovB_Ca-RTE-Ctenotus_atlas     | G-TAG-GCAC | AATAAA-GGA | CAAGAACGG-  | CAAGGACCTA | ACAG--AAGC | AGATGAGATT  | AAGAAGAGGT | 1810  |
| BovB_Es-RTE-Egernia_stokesii   | A-TGG-GCAT | GATAAA-GAA | CAAGAATGG-  | TAGGGACCTA | ATGG--AAGC | AGACAAAATT  | AAGAAGAGCT | 1648  |
| BovB_Tr-RTE-Tiliqua_rugosa     | A-TGG-GCAT | GATAAT-GGA | CAAGAATAG-  | TAGGAACCTA | ACGG--AAG- | ---AAGATT   | AAGAAGAGAA | 1650  |
| BovB_ALI-RTE-Amblyomma_limbatu | ATGGG--CAT | AATAAA-GGA | CAAAAATGG-  | CAGGGACCTA | ACAG--AGAC | AGAAGAGATC  | AAGAAGAGGT | 1788  |
| BovB_Hs-RTE-Hydrophis_spiralis | -----      | -----      | -----       | -----      | -----      | -----       | -----      | ----- |
| BovB_VA-RTE-Vipera_ammodytes   | ATGGG--CAT | GATAAA-GGA | CAAAAATGG-  | CAGGGACCTA | ACAG--AGGC | AGAAGAGATT  | AAGAAGAGGT | 1615  |
| BovB_ACo-RTE-Agkistrodon_conto | ATGGG--CAT | GATAAA-GGA | CAAAAATGG-  | CAGGGACCTA | ACAG--AGGC | AGAAGAGATT  | AAGAAGAGGT | 1615  |
| BovB_Pg-RTE-Perameles_gunnii   | -----      | -----      | -----       | -----      | -----      | -----       | -----      | ----- |
| BovB_lo-RTE-Isodon_obesulus    | ATCGT--CAT | GATAAA-AGA | CAAAAATAGGG | TA-----    | --GA--CAAC | AGAAGTGATT  | AA-AATAGAT | 234   |
| BovB_Bp-RTE-Burramys_parvurus  | ATGGG--CAT | GATAAA-AGA | CAAAACATGG  | TAGGGAATTA | ACAG--AAGC | AAAAGAGATT  | AAGAAGAGGT | 315   |
| BovB_Pb-RTE-Petaurus_breviceps | ATAGG--CAT | GATAAA-AGA | CAAA--AATGG | TATGGACCTA | ATAG--AAGC | AGAAGAGATT  | AA--GAGGT  | 379   |
| BovB_Ma-RTE-Macropus_antilopin | ATGGG--ATT | AAAAAA-AAA | AAAGATAGGA  | AAT-----   | -TAG--CAAC | AGAAGAGAAT  | AAGAAGAGGT | 1731  |
| BovB_Af-RTE-Antechinus_flavipe | AGAGG--TAT | AATAAA-AGT | CAAA-AAGGA  | CAAAGTCTTG | ACGG--AAGT | AGAAGAGATT  | AAGATGAAGT | 944   |
| BovB_Ac-RTE-Anolis_carolinensi | AAGGG--CAT | GATCAA-AAA | CAAAGATGG-  | CAAGAACCTA | ACAG--AAGC | TGAAGAGATC  | AAGAAAAGGT | 1584  |
| BovB_BM-RTE-Bombyx_mori        | AGACCTGGGT | TATCGG-CGA | CGAGGATGGC  | GACTCCATCA | CTGA--CCTT | CAGCTGA-TC  | ACAGAAAGAT | 1441  |
| BovB_Dr-RTE-Christinus         | AAGCAGCAAA | TGTCAA-AGA | TCGGAATGGT  | AAAGT-ACTA | CAGA--ATGA | AGACCAAATC  | AAGAAGAGGT | 1487  |
| BovB_La-RTE-Loxodonta_africana | AAGTTGCAAT | ACTGAA-GGA | TTCCATGGGG  | AAAATATTAA | ACGA--CGC  | AGAAAAGCATC | AAAAGAAGAT | 1613  |
| BovB_Pc-RTE-Procavia_capensis  | GAGTTGCAAT | AGTGAA-GGA | TTCTACAGGG  | AAAATATTAA | ATGA--CTC  | AGGGAGCATC  | AAAAGAAGAT | 1613  |
| BovB_Et-RTE-Christinus         | AAACTTCAAT | TCTGAA-AGA | TTCTATAGGC  | AAAATATTGA | ATGA--TGC  | AGGAAGCATC  | AAGAAGAGAT | 1427  |
| BovB-Ta-RTE-Tachyglossus_acule | GGATTGGCTT | TGTCAA-AAG | CAAAGATGGA  | CTGACGATAA | ATGA--TGC  | CAGTGGAAATC | AAACAGAGAT | 1750  |
| BovB_Plat-RTE-Ornithorhynchus  | GGATTGGCTT | TGTCAA-AAG | CAAAGATGGA  | CTGACGATAA | ATGA--TGC  | CAGTGGAAATC | AAACAGAGAT | 1739  |
| BovB_Ec-RTE-Equus_caballus     | GATTAGGAAT | GCTGAA-CGA | CCAACAGGGA  | AGCACACTAT | CTGA--TCA  | GGAGAAAATA  | AAGGGAAGGT | 1509  |
| BovB_Cg-RTE-Christinus         | GTTTAGGAAT | GCTAGA-AGA | ACAACATGGA  | AAATCATGAT | CTGA--TCA  | AGAAAAAATT  | AAGAAGAGAT | 1095  |
| BovB_Bh-RTE-Bothriocroton_hydr | -----      | ---AATGAGA | CAGAGTGGGA  | AACGCGCCT  | CTCATCCTGC | CCACTGACTC  | CCTCTATGGT | 57    |
| BovB_MI-RTE-Gehyra_variegata   | -ACCTAGAAC | TGAATACAGA | CTAGATTAT-  | GAGTTTTTTA | TTAA---AAA | ATTTTGACTT  | AAATTGAAGT | 162   |
| Sly-rnd1_family284-LINE/RTEBov | -----      | -----      | -----       | -----      | -----      | -----       | -----      | ----- |
| Sly-rnd5_family2019-LINE/RTEBo | -----      | -----      | -----       | -----      | -----      | -----       | -----      | ----- |
| Sly-rnd3_family322-LINE/RTEBov | -----      | -----      | -----       | -----      | -----      | -----       | -----      | ----- |
| Sly-rnd5_family1698-LINE/RTEBo | -----      | -----      | -----       | -----      | -----      | -----       | -----      | ----- |
| Sly-rnd1_family795-LINE/RTEBov | -----      | -----      | -----       | -----      | -----      | -----       | -----      | ----- |
| Stu-rnd-5_family-3162_LINE_RTE | TGTACTTTGA | GTGTTATTAG | TGCTTATGCG  | CCTCAAGTGG | GCNTGGACGA | GGAGGCCAAA  | AAGCTTTTT  | 1258  |
| Sly-rnd6_family1960-LINE/RTEBo | CTTACTTTGA | ACATNATTAG | TGCNTACGCG  | CGCAAGCGG  | GCTTGGACGA | GGAGGNCAAA  | AAGCTNTTTT | 437   |
| Stu-rnd-5_family-2493_LINE_RTE | -----      | -----      | -----       | -----      | -----      | -----       | -----      | ----- |
| Sly-rnd5_family447-LINE/RTEBov | -----      | -----      | -----       | -----      | -----      | -----       | -----      | ----- |
| Stu-rnd-6_family-2093_LINE_RTE | -----      | -----      | -----       | -----      | -----      | -----       | -----      | ----- |
| Consensus                      | -----A-    | --T-AA--GA | C-A--A-GG-  | -A-----A   | A-----GC   | -GA---AT-   | AA---AG-T  |       |
| Conservation                   |            |            |             |            |            |             |            |       |

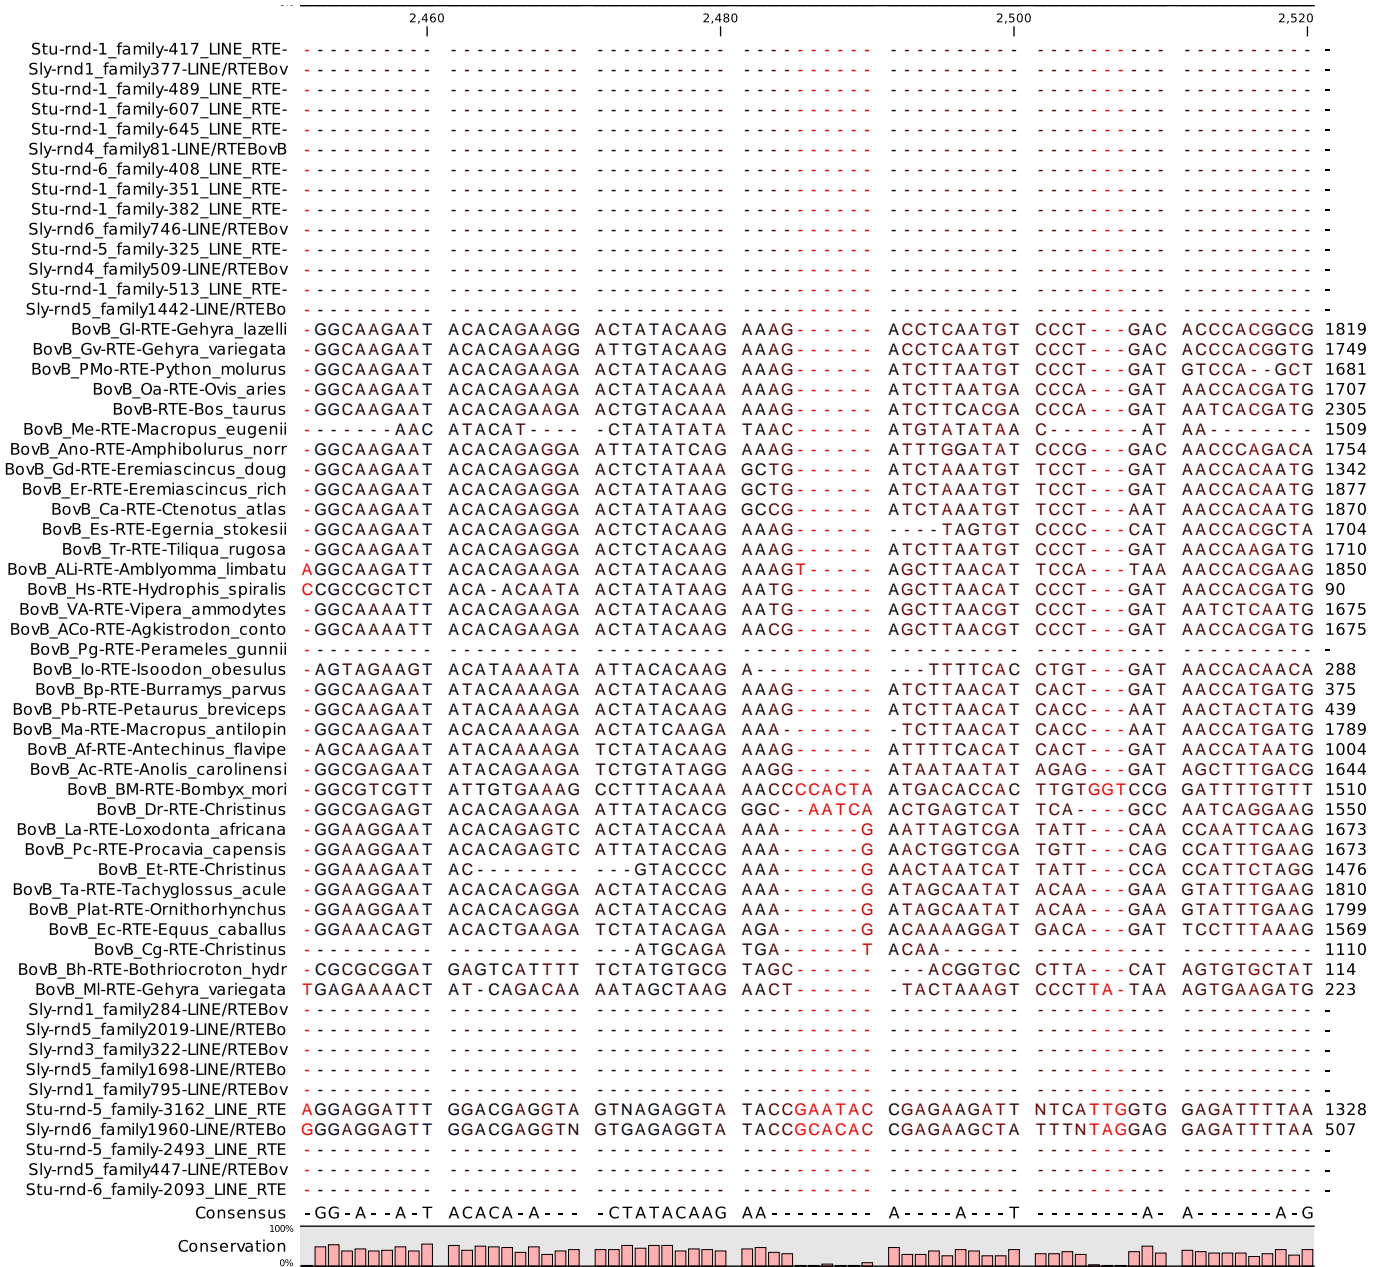



|                                 | 2,540                   | 2,560            | 2,580            |                  |                    |                    |                    |      |
|---------------------------------|-------------------------|------------------|------------------|------------------|--------------------|--------------------|--------------------|------|
| Stu-rnd-1_family-417_LINE_RTE   | ----                    | ----             | ----             | ----             | ----               | ----               | ----               |      |
| Sly-rnd1_family377-LINE/RTEBov  | ----                    | ----             | ----             | ----             | ----               | ----               | ----               |      |
| Stu-rnd-1_family-489_LINE_RTE   | ----                    | ----             | ----             | ----             | ----               | ----               | ----               |      |
| Stu-rnd-1_family-607_LINE_RTE   | ----                    | ----             | ----             | ----             | ----               | ----               | ----               |      |
| Stu-rnd-1_family-645_LINE_RTE   | ----                    | ----             | ----             | ----             | ----               | ----               | ----               |      |
| Sly-rnd4_family81-LINE/RTEBovB  | ----                    | ----             | ----             | ----             | ----               | ----               | ----               |      |
| Stu-rnd-6_family-408_LINE_RTE   | ----                    | ----             | ----             | ----             | ----               | ----               | ----               |      |
| Stu-rnd-1_family-351_LINE_RTE   | ----                    | ----             | ----             | ----             | ----               | ----               | ----               |      |
| Stu-rnd-1_family-382_LINE_RTE   | ----                    | ----             | ----             | ----             | ----               | ----               | ----               |      |
| Sly-rnd6_family746-LINE/RTEBov  | ----                    | ----             | ----             | ----             | ----               | ----               | ----               |      |
| Stu-rnd-5_family-325_LINE_RTE   | ----                    | ----             | ----             | ----             | ----               | ----               | ----               |      |
| Sly-rnd4_family509-LINE/RTEBov  | ----                    | ----             | ----             | ----             | ----               | ----               | ----               |      |
| Stu-rnd-1_family-513_LINE_RTE   | ----                    | ----             | ----             | ----             | ----               | ----               | ----               |      |
| Sly-rnd5_family1442-LINE/RTEBo  | ----                    | ----             | ----             | ----             | ----               | ----               | ----               |      |
| BovB_GI-RTE-Gehyra_lazelli      | GGGAGATCA - CTGACCTCGA  | GCCAGACATC       | CTGGAGTGCG       | AA - GTCAAAT     | GG - - - GCCTT     | AGAAAGCATT         | 1884               |      |
| BovB_Gv-RTE-Gehyra_variegata    | GGGAGATCA - CTGACCTCGA  | GCCAGACATC       | CTGGAGTGCA       | AA - GTCAAAT     | GG - - - GCCTT     | AGAAAGCATT         | 1814               |      |
| BovB_PMo-RTE-Python_molurus     | GGTGTGTCA - CTGACCTTGA  | GCCAGACATC       | CTAGAGAGTG       | AA - GTCAAAGT    | GG - - - GCCTT     | AGGAAGCATT         | 1746               |      |
| BovB_Oa-RTE-Ovis_aries          | GTGTGATCA - CTCACCTAGA  | GCCAGACATC       | CTGGAGTGTG       | AA - GTCAAAGT    | GG - - - GCCTT     | AGGAAGCATC         | 1772               |      |
| BovB-RTE-Bos_taurus             | GTGTGATCA - CTGACCTAGA  | GCCAGACATC       | CTGGAATGTG       | AA - GTCAAAGT    | GG - - - GCCTT     | AGAAAGCATC         | 2370               |      |
| BovB_Me-RTE-Macropus_eugenii    | -----                   | - CATATATA       | -----            | -----            | -----              | -----              | 1517               |      |
| BovB_Ano-RTE-Amphibolurus_norr  | ATGTAGTTG - CTGACCTTGA  | GCCAGACATC       | CTGGAGAGCG       | AA - GTCAAAGT    | GG - - - GCCTT     | AGAAAGCCTG         | 1819               |      |
| BovB_Gd-RTE-Eremiascincus_doug  | GTGCGGTCA - CTGAACTTGA  | ACCTGACATC       | CTGGAGTGTG       | AA - GTCAAAGT    | GG - - - GCCTT     | AGAAAGCATC         | 1407               |      |
| BovB_Er-RTE-Eremiascincus_rich  | GTGCGGTCA - CTGAACTTGA  | ACCTGACATC       | CTGGAGTGTG       | AA - GTCAAAGT    | GG - - - GCCTT     | AGAAAGCATC         | 1942               |      |
| BovB_Ca-RTE-Ctenotus_atlas      | GTGCGGTCA - CTGAGCTCGA  | ACCTGACATC       | CTGGAGTGTG       | AA - GTCAAAGT    | GG - - - GCCTT     | AGAAAGCCTC         | 1935               |      |
| BovB_Es-RTE-Egernia_stokesii    | GTGTGATCG - CTGAACTTGA  | GCCAGACATC       | CTGGAGTGTG       | AA - GTCAAAGT    | GG - - - GTCCT     | AGGAAGCATC         | 1769               |      |
| BovB_Tr-RTE-Tiliqua_rugosa      | GTGTGACTG - CTGAACTTGA  | GCCAGACATC       | CTGGAGTGTG       | AA - GTCAAAGT    | GG - - - GCCCT     | AGAAAACATC         | 1775               |      |
| BovB_ALi-RTE-Amblyomma_limbatu  | GAGAGGACA - CCGAACTAGA  | GCCAGACATC       | CTGGAATGTG       | AA - GTCAAAT     | GG - - - GCCTT     | AGGAAGTTTG         | 1915               |      |
| BovB_Hs-RTE-Hydrophis_spiralis  | AGGTGGTCA - CTGACCTCGA  | GCCAGAGATC       | CTGGAATGTA       | AA - GTCAAAT     | GG - - - GCCTT     | AGGAAATCTG         | 155                |      |
| BovB_VA-RTE-Vipera_ammodytes    | AGGTGGTCA - CTGACCTCGA  | GCCAGACATC       | CTAGAATGTG       | AA - GTTAAAGT    | GG - - - GCCTT     | AGAAAAGCTG         | 1740               |      |
| BovB_ACo-RTE-Agkistrodon_conto  | GGTGGTCA - CTGACCTCGA   | GCCAGACATC       | CTAGAATGTG       | AA - GTGAAAT     | GG - - - GCCTT     | AGGAAATCTG         | 1740               |      |
| BovB_Pg-RTE-Perameles_gunnii    | -----                   | -----            | -----            | -----            | -----              | -----              | -                  |      |
| BovB_lo-RTE-Isodon_obesulus     | GTATGGTTC - CTAGGCTACT  | GACTTAGAGC       | C - AGAATATG     | AA - ATTAAGT     | AA - - - GCATT     | AGGAAGTACT         | 352                |      |
| BovB_Bp-RTE-Burramys_parvulus   | GTGTGGTTA - CTGATCTAGA  | GCCAGACATC       | CTGGAGAATG       | AA - GTCAAAGT    | GG - - - GC - TT   | AGGAAACATT         | 439                |      |
| BovB_Pb-RTE-Petaurus_breviceps  | GTGTGGTTA - CTGATCTAGA  | GCCAGACATC       | CTGGAGAATG       | AA - GTCAAAGT    | GG - - - GCCTT     | AGGAAGCATT         | 504                |      |
| BovB_Ma-RTE-Macropus_antilopin  | GTGTGGTTA - CTGATCTAGA  | GCCAGACATC       | CTGGAGAATG       | AA - GTCAAAGT    | GG - - - GCCTT     | AGGAAGCATT         | 1854               |      |
| BovB_Af-RTE-Antechinus_flavipe  | AAATGCTTAA - CTGATTTAGA | ACTAAAAAT        | CAGAAAAATG       | AA - GTTAAAGT    | GA - TGA - ACCTT   | AGAAAGCATT         | 1074               |      |
| BovB_Ac-RTE-Anolis_carolinensi  | GTGTGGTGA - GTGAAGTAGA  | ACCAGACATC       | CTGAGGAGTG       | AG - GTTGAAC     | GG - - - GCCTT     | AAGAAGCATT         | 1709               |      |
| BovB_BM-RTE-Bombyx_mori         | GGGCTGTGA - TAGTTCAAGA  | ACCAATCCATA      | TTGCATTCGG       | AA - ATTAAGGC    | GA - - - - CCTT    | GAAAAAATA          | 1575               |      |
| BovB_Dr-RTE-Christinus          | ACCCCAAAA - GCGAGCAGGA  | ACCAGATATT       | CTGGAGGAGG       | AGGTAGCCTG       | GG - - - CCTT      | GAAAGAACTA         | 1615               |      |
| BovB_La-RTE-Loxodonta_africana  | AGGTAGCAT - ATGATCAGGA  | ACCGATGGTA       | CTGAAGGAAG       | AA - GTCCAAGC    | TG - - - - CACT    | GAAGGCATTG         | 1738               |      |
| BovB_Pc-RTE-Procavia_capensis   | AGGTAGCAT - ATGATCAGGA  | ACCAATGGTA       | CTGAAGGAAG       | AA - GTCCAAGC    | TG - - - - CATT    | GAAGGCATTG         | 1738               |      |
| BovB_Et-RTE-Christinus          | AGGTGGCAT - ATGAGCAAGA  | ATCAATGGTG       | CTGAAGGA - G     | AA - GTTCAAAC    | TG - - - - CACT    | GAATGC - TTA       | 1539               |      |
| BovB_Ta-RTE-Tachyglossus_acule  | AAGCTCCTT - TTGAATTAGA  | GCCACTCATC       | ATGGAAGATG       | AA - GTTAGATC    | AG - - - - CTTT    | ACACTGCCTC         | 1875               |      |
| BovB_Af-RTE-Antechinus_flavipe  | AAATGCTTAA - CTGATTTAGA | ACTAAAAAT        | CAGAAAAATG       | AA - GTTAAAGT    | GA - TGA - ACCTT   | AGAAAGCATT         | 1074               |      |
| BovB_Plat-RTE-Ornithorhynchus   | AAGTTCCTT - TTGAATTAGA  | GCCACTCATC       | ATGGAAGATG       | AA - GTTAGATC    | AG - - - - CTTT    | ACACTGTCTC         | 1864               |      |
| BovB_Ec-RTE-Equus_caballus      | AAGATTCCT - ATGAGGAAGA  | ACCCATAATT       | CTAGAAAAGT       | AA - GTGAAAAGC   | TG - - - - CCCT    | GAAAAGTACTG        | 1634               |      |
| BovB_Cg-RTE-Christinus          | ----- CTCT              | GTTAG - - - -    | ACCCCAAA - - -   | GAAAATG          | AA - - - - AC      | TC - - - - ATCA    | GAATATACTG         | 1155 |
| BovB_Bh-RTE-Bothriocroton_hydr  | TTACGGTCTC - ATGGATCAGT | GCCTTGTTCG       | GGCGAAGGTG       | CTTTAGTAGC       | TC - AATGAAGC      | TATGAGTTAT         | 184                |      |
| BovB_MI-RTE-Gehyra_variegata    | ATGAACAGA - TTAATTTAAA  | GAGATGAAAT       | CTAGCAGATA       | AGGGT - - - -    | - - - - - GCCTG    | AAGAACTTTA         | 282                |      |
| Sly-rnd1_family284-LINE/RTEBov  | -----                   | -----            | -----            | -----            | -----              | -----              | -                  |      |
| Sly-rnd5_family2019-LINE/RTEBov | -----                   | -----            | -----            | -----            | -----              | -----              | -                  |      |
| Sly-rnd3_family322-LINE/RTEBov  | -----                   | -----            | -----            | -----            | -----              | -----              | -                  |      |
| Sly-rnd5_family1698-LINE/RTEBov | -----                   | -----            | -----            | -----            | -----              | -----              | -                  |      |
| Sly-rnd1_family795-LINE/RTEBov  | -----                   | -----            | -----            | -----            | -----              | -----              | -                  |      |
| Stu-rnd-5_family-3162_LINE_RTE  | TGGCCACATC              | GGGGCAACTT       | CTAGTGGATT       | TGACGATGTG       | CATGGAGGCT         | TT - GGTTTTG       | GGGANAGAAA 1397    |      |
| Sly-rnd6_family1960-LINE/RTEBo  | TGGCCACATC              | GAGACCACTT       | CAAG - GGNTN     | CGATGATGTT       | CATGGAGGCT         | TT - CGGTTTCG      | GGGAT - - GAA 574  |      |
| Stu-rnd-5_family-2493_LINE_RTE  | -----                   | -----            | -----            | -----            | -----              | -----              | -                  |      |
| Sly-rnd5_family447-LINE/RTEBov  | -----                   | -----            | -----            | -----            | -----              | -----              | -                  |      |
| Stu-rnd-6_family-2093_LINE_RTE  | -----                   | -----            | -----            | -----            | -----              | -----              | -                  |      |
| Consensus                       | -- G - - - - -          | - TGA - C - - GA | - CCA - A - AT - | CT - GA - - - TG | AA - - T - - A - - | - G - - - - C - TT | A - - AA - - - T - |      |
| Conservation                    |                         |                  |                  |                  |                    |                    |                    |      |

|                                 | 2,600             | 2,620              | 2,640            | 2,660              |                     |                   |                     |       |
|---------------------------------|-------------------|--------------------|------------------|--------------------|---------------------|-------------------|---------------------|-------|
| Stu-rnd-1_family417_LINE_RTE    | -----             | -----              | -----            | -----              | -----               |                   |                     |       |
| Sly-rnd1_family377-LINE/RTEBov  | -----             | -----              | -----            | -----              | -----               |                   |                     |       |
| Stu-rnd-1_family489_LINE_RTE    | -----             | -----              | -----            | -----              | -----               |                   |                     |       |
| Stu-rnd-1_family607_LINE_RTE    | -----             | -----              | -----            | -----              | -----               |                   |                     |       |
| Stu-rnd-1_family645_LINE_RTE    | -----             | -----              | -----            | -----              | -----               |                   |                     |       |
| Sly-rnd4_family81-LINE/RTEBovB  | -----             | -----              | -----            | -----              | -----               |                   |                     |       |
| Stu-rnd-6_family408_LINE_RTE    | -----             | -----              | -----            | -----              | -----               |                   |                     |       |
| Stu-rnd-1_family351_LINE_RTE    | -----             | -----              | -----            | -----              | -----               |                   |                     |       |
| Stu-rnd-1_family382_LINE_RTE    | -----             | -----              | -----            | -----              | -----               |                   |                     |       |
| Sly-rnd6_family746-LINE/RTEBov  | -----             | -----              | -----            | -----              | -----               |                   |                     |       |
| Stu-rnd-5_family325_LINE_RTE    | -----             | -----              | -----            | -----              | -----               |                   |                     |       |
| Sly-rnd4_family509-LINE/RTEBov  | -----             | -----              | -----            | -----              | -----               |                   |                     |       |
| Stu-rnd-1_family513_LINE_RTE    | -----             | -----              | -----            | -----              | -----               |                   |                     |       |
| Sly-rnd5_family1442-LINE/RTEBo  | -----             | -----              | -----            | -----              | -----               |                   |                     |       |
| BovB_GI-RTE-Gehyra_lazelli      | ACTAACAAACA       | AA - GCTAGTG       | GAG - - - ATGA   | TGGGATCCCA         | GCT - GAGCTT        | TTCAAAA - - - -   | - - - - GTCTTAA     | 1942  |
| BovB_Gv-RTE-Gehyra_variegata    | ACTAACAAACA       | AA - GCTAGTG       | GAG - - - ATGA   | TGGGATCCCA         | GCT - GAGCTT        | TTCAAAA - - - -   | - - - - GTCTTAA     | 1872  |
| BovB_PMo-RTE-Python_molurus     | GCTAACAAACA       | AA - GCTAGTG       | GAG - - - ATGA   | CAGTATTCCA         | GCT - GAGTTA        | TTTAAAA - - - -   | - - - - ATACTAA     | 1804  |
| BovB_Oa-RTE-Ovis_aries          | ACTATGAAACA       | AA - GCTAGTG       | GAG - - - GTGA   | TGGAATTCCA         | GCT - GAGCTA        | TTTCAA - - - -    | - - - - ATCCTAA     | 1830  |
| BovB-RTE-Bos_taurus             | ACTACGAACA        | AA - GCTAGTG       | GAG - - - GTGA   | TGGAATTCCA         | GTT - GAGCTA        | TTCAA - - - -     | - - - - ATCCTGA     | 2428  |
| BovB_Me-RTE-Macropus_eugenii    | - - TACAAACA      | GT - ACAAG - -     | - - - - - - - -  | - - - - - - - -    | - - - - - - - -     | - - - - - - - -   | - - - - - - - - A   | 1533  |
| BovB_Ano-RTE-Amphibolurus_norr  | GCTAACAAACA       | AG - GCCAGTG       | GAG - - - GTGA   | TGGCATTCCA         | GTT - GAACATA       | TTTAAA - - - -    | - - - - ATCTTGA     | 1877  |
| BovB_Gd-RTE-Eremiascincus_doug  | ACTAACAAACA       | AA - GCGAGTG       | GGG - - - GTGA   | CAACATTCCA         | GCT - GAGTTA        | CTCAAA - - - -    | - - - - ACCTTAA     | 1465  |
| BovB_Er-RTE-Eremiascincus_rich  | ACTAACAAACA       | AA - GCGAGTG       | GAG - - - GTGA   | CAACATTCCA         | GCT - GAGTTA        | CTCAAA - - - -    | - - - - ACCTTAA     | 2000  |
| BovB_Ca-RTE-Ctenotus_atlas      | ACTAACAAACA       | AA - GCTAGTG       | GAG - - - GTGA   | CAGCATTCCA         | GCA - GAATTA        | CTCAAA - - - -    | - - - - ATCTTAA     | 1993  |
| BovB_Es-RTE-Egernia_stokesii    | ACTAACAAAA        | AA - ACCAGAG       | GAG - - - GTGA   | CAGTATTCCA         | GCT - GAGCTC        | CTGAAA - - - -    | - - - - AGTTTAA     | 1827  |
| BovB_Tr-RTE-Tiliqua_rugosa      | ACTAACAAACA       | AA - GCTAGCG       | GAG - - - GCAA   | CAGTATTCCA         | GTT - GAGCTC        | CTTAAA - - - -    | - - - - ACCTTAA     | 1833  |
| BovB_ALi-RTE-Amblyomma_limbatu  | TCCAACAACA        | AA - GCTAGTG       | GAGACAGTGA       | CAGTATTCCA         | GCTCGAGCTA          | TTCAAATCC         | AAAATCCTGA          | 1984  |
| BovB_Hs-RTE-Hydrophis_spiralis  | AGCAACAACA        | AA - GT - - - -    | G - - - - - GTGA | CAGTATTCCA         | GCT - GAGCTA        | TTCAA - - - -     | - - - - ATCTTAA     | 209   |
| BovB_VA-RTE-Vipera_ammodytes    | AGCAACAACA        | AA - GCTAGTG       | GAG - - - GTGG   | CAATATTCCA         | GCT - GAACATA       | TTCAA - - - -     | - - - - ATCTTAA     | 1798  |
| BovB_ACo-RTE-Agkistrodon_conto  | AGCAACAACA        | AA - GCTAGTG       | GAG - - - GTGA   | CAGTATTCCA         | GCT - GAGCTA        | TTCAA - - - -     | - - - - ATCTTAA     | 1798  |
| BovB_Pg-RTE-Perameles_gunnii    | -----             | -----              | -----            | -----              | -----               | -----             | -----               | ----- |
| BovB_lo-RTE-Isoodon_obesulus    | GCTAACAAATA       | AGAGCTAATG         | AAA - - - CTGA   | ATTAATTCCA         | - ACTGAGCTA         | TAAAAA - - - -    | - - - - TCTCAA      | 411   |
| BovB_Bp-RTE-Burramys_parvulus   | GCTAACAAATA       | AG - GCTAGTG       | GAG - - - GTGA   | TAGAATTCCA         | - GCTGAGCTA         | TTTAAAA - - - -   | - - - - TCCTAA      | 497   |
| BovB_Pb-RTE-Petaurus_breviceps  | GCTAACAAATA       | AG - GCTAGTG       | GAG - - - GTGA   | TGGAATTCCA         | AGCTGAGCTA          | TTTAAAA - - - -   | - - - - TCCTAA      | 563   |
| BovB_Ma-RTE-Macropus_antilopin  | GCTAACAAATA       | AG - GCTAGTG       | GAG - - - GTGA   | TGGAATTCCA         | - GCTGAGCTA         | TTTAAAA - - - -   | - - - - TCCTAA      | 1912  |
| BovB_Af-RTE-Antechinus_flavipe  | CCTAATAATA        | AA - ATTAGTG       | GAG - - - GTGA   | TAAAATTCCA         | - GCTGAACATA        | TTTAAAAA - - - -  | - - - - TCTTAA      | 1133  |
| BovB_Ac-RTE-Anolis_carolinensi  | GCTAACAAACA       | AG - GCAGCAG       | GAG - - - ACGA   | CGGGATCCCA         | GCT - GAGCTG        | TTTAAA - - - -    | - - - - ATCTTGG     | 1767  |
| BovB_BM-RTE-Bombyx_mori         | AAGGATAATA        | AA - GCGCCAG       | GAC - - - ATGA   | TAACATCACA         | GCA - GAGAC -       | TTTAAAG - - - -   | - - - - CACTC       | 1631  |
| BovB_Dr-RTE-Christinus          | CCAACACAGGA       | AA - GCCCCAG       | GCA - - - TTGA   | TGGCATACCA         | ACT - GAATT -       | ACTCAAA - - - -   | - - - - C - - - C   | 1668  |
| BovB_La-RTE-Loxodonta_africana  | GCGAAAAAAA        | AG - GCTCCAG       | GAA - - - TTGA   | CGGAATATCA         | ATT - GAGATG        | TTTCAAC - - - -   | - - - - AAACG       | 1795  |
| BovB_Pc-RTE-Procavia_capensis   | GCAAAAAACA        | AG - GCTCCAG       | GAA - - - TTGA   | TGGAATATCA         | ATT - GAGATA        | TTTCAAC - - - -   | - - - - AAACA       | 1795  |
| BovB_Et-RTE-Christinus          | TCCAAAAAACA       | AG - CCTCAAG       | GAA - - - TTGA   | TGAAATGCCC         | ATT - GAAATG        | TTTCAAC - - - -   | - - - - AAAAA       | 1596  |
| BovB_Ta-RTE-Tachyglossus_acule  | ACCAAAAAATA       | AG - GCACCTG       | GCT - - - TTGA   | TAGGCTTCCT         | ATT - GAGGTG        | TTTCAGG - - - -   | - - - - CAGCT       | 1932  |
| BovB_Plat-RTE-Ornithorhynchus   | GCCAAAAATA        | AG - GCACCTG       | GCT - - - TTGA   | TAGGCTTCCT         | ATT - GAGGTG        | TTTCAGG - - - -   | - - - - CAGCT       | 1921  |
| BovB_Ec-RTE-Equus_caballus      | GGAAGAAATA        | AG - TCACCAG       | GGG - - - TAGA   | TGGGATATCG         | ATA - GAATTA        | TTTCAAG - - - -   | - - - - CCACA       | 1691  |
| BovB_Cg-RTE-Christinus          | G - AAGAATTA      | TA - ACAAAAAG      | AGA - - - AAAA   | TAGGATATCA         | ATA - GAGCTA        | TTTCAAG - - - -   | - - - - CCACA       | 1211  |
| BovB_Bh-RTE-Bothriocroton_hydr  | GCCATCTAGG        | ATTACCCAAAG        | ATG - - - GACA   | GGTCATAGTA         | GAGAGTTCTG          | ACTAAACGT - - -   | - - - - GATCCGCT    | 248   |
| BovB_MI-RTE-Gehyra_variegata    | TAAAGAAATA        | TAAATATTTTG        | GAT - - - - - A  | GGAGGTAGCA         | AAAAAAAATG          | TTACAA - - - -    | - - - - - - - - A   | 333   |
| Sly-rnd1_family284-LINE/RTEBov  | -----             | -----              | -----            | -----              | -----               | -----             | -----               | ----- |
| Sly-rnd5_family2019-LINE/RTEBov | -----             | -----              | -----            | -----              | -----               | -----             | -----               | ----- |
| Sly-rnd3_family322-LINE/RTEBov  | -----             | -----              | -----            | -----              | -----               | -----             | -----               | ----- |
| Sly-rnd5_family1698-LINE/RTEBov | -----             | -----              | -----            | -----              | -----               | -----             | -----               | ----- |
| Sly-rnd1_family795-LINE/RTEBov  | -----             | -----              | -----            | -----              | -----               | -----             | -----               | ----- |
| Stu-rnd-5_family3162_LINE_RTE   | CGGAGGTGGA        | GCTTCGCTTC         | TGGATTTTGC       | TAAAGCTTTT         | GAGTTGGTGA          | TNGCTAACTC        | GAGCTTCCG           | 1467  |
| Sly-rnd6_family1960-LINE/RTEBo  | CGGAGG - - - A    | GTTTCGCTTT         | TGGATTTTGC       | GAAAGCTTTT         | GAGTTGGTGA          | TTGCTAACTC        | GAGCTTCCG           | 641   |
| Stu-rnd-5_family2493_LINE_RTE   | -----             | -----              | -----            | -----              | -----               | -----             | -----               | ----- |
| Sly-rnd5_family447-LINE/RTEBov  | -----             | -----              | -----            | -----              | -----               | -----             | -----               | ----- |
| Stu-rnd-6_family2093_LINE_RTE   | -----             | -----              | -----            | -----              | -----               | -----             | -----               | ----- |
| Consensus                       | - C - AA - AA - A | A - - GC - - - - G | G - - - - - TGA  | - - - - - AT - CCA | - - - - - GAG - T - | TT - - AA - - - - | - - - - - C - - - A |       |

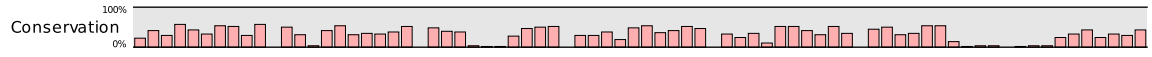

|                                | 2,680                                                                                                         | 2,700 | 2,720 |       |
|--------------------------------|---------------------------------------------------------------------------------------------------------------|-------|-------|-------|
| Stu-rnd-1_family-417_LINE_RTE  | -----                                                                                                         | ----- | ----- | ----- |
| Sly-rnd1_family377-LINE/RTEBov | -----                                                                                                         | ----- | ----- | ----- |
| Stu-rnd-1_family-489_LINE_RTE  | -----                                                                                                         | ----- | ----- | ----- |
| Stu-rnd-1_family-607_LINE_RTE  | -----                                                                                                         | ----- | ----- | ----- |
| Stu-rnd-1_family-645_LINE_RTE  | -----                                                                                                         | ----- | ----- | ----- |
| Sly-rnd4_family81-LINE/RTEBovB | -----                                                                                                         | ----- | ----- | ----- |
| Stu-rnd-6_family-408_LINE_RTE  | -----                                                                                                         | ----- | ----- | ----- |
| Stu-rnd-1_family-351_LINE_RTE  | -----                                                                                                         | ----- | ----- | ----- |
| Stu-rnd-1_family-382_LINE_RTE  | -----                                                                                                         | ----- | ----- | ----- |
| Sly-rnd6_family746-LINE/RTEBov | -----                                                                                                         | ----- | ----- | ----- |
| Stu-rnd-5_family-325_LINE_RTE  | -----                                                                                                         | ----- | ----- | ----- |
| Sly-rnd4_family509-LINE/RTEBov | -----                                                                                                         | ----- | ----- | ----- |
| Stu-rnd-1_family-513_LINE_RTE  | -----                                                                                                         | ----- | ----- | ----- |
| Sly-rnd5_family1442-LINE/RTEBo | -----                                                                                                         | ----- | ----- | ----- |
| BovB_GI-RTE-Gehyra_lazelli     | AAGA -GGACG CCGT TAAAGT GCTGCACTCA ATATGCCAGC AAATTTGGAA AACGCAACAG TGGCCACA-- 2009                           |       |       |       |
| BovB_Gv-RTE-Gehyra_variegata   | AACA -TGATG CCGT TAAAGT GCTGCACTCA ATATGCCAGC AAATTTGGAA AACGCAACAG TGGCCACA-- 1939                           |       |       |       |
| BovB_PMo-RTE-Python_molurus    | AAGA -TGATG CTGT TAAAGT GCTGCACTCA ATATGCCAGC AAGTTTGGAA AACGCAACAG TGGCCACG-- 1871                           |       |       |       |
| BovB_Oa-RTE-Ovis_aries         | AAGA -TGATG CTGT GAAAGT GCTGCACTCA ATATGCCAGC AAATTTGGAA AACTCAGCAG TGGCCACA-- 1897                           |       |       |       |
| BovB-RTE-Bos_taurus            | AAGA -TGATG CTGT GAAAGT GCTGCGCTCA ATATGCCAGC AAATTTGGAA AACTCAGCAG TGGCCACA-- 2495                           |       |       |       |
| BovB_Me-RTE-Macropus_eugenii   | AAAA -T----- -CTTA ACAT----- -CACTGA TAATCACA-- 1560                                                          |       |       |       |
| BovB_Ano-RTE-Amphibolurus_norr | AAGA -TGATG CTGT TAAGGT GCTACATTC A ATATGCCAGC AAGTTTGGAA AACTCAACAG TGGCCAGA-- 1944                          |       |       |       |
| BovB_Gd-RTE-Eremiascincus_doug | AAGA -TGATG CTGT CAAAGT GCTGCACTCC ATATGCCAGC AAATTTGGAA AACCCAGCAG TGGCCACA-- 1532                           |       |       |       |
| BovB_Er-RTE-Eremiascincus_rich | AAGA -TGATG CTGT CAAAGT GCTGCACTCC ATATGCCAGC AAATTTGGAA AACCCAGCAG TGGCCACA-- 2067                           |       |       |       |
| BovB_Ca-RTE-Ctenotus_atlas     | AAGA -TGATG CTGT CAAAGT GCTGCACTCC ATATGCCAGC AAATTTGGAA AACCCAACAG TGGCCGCA-- 2060                           |       |       |       |
| BovB_Es-RTE-Egernia_stokesii   | AAGA -TGATG CTGT TAAAGT GCTGCACTCA ATCTGCCAGC AAATTTGGAA AACTCAACAG TGGCCTCA-- 1894                           |       |       |       |
| BovB_Tr-RTE-Tiliqua_rugosa     | AAGA -TGAAG CTGT TAAAGT GCTGCACTCA ATCTGCCAGC AAAGTTGGAA AACTCAACAG TGGCCTCA-- 1900                           |       |       |       |
| BovB_ALi-RTE-Amblyomma_limbatu | AAGA -CGATG CAGT AAAAGT GCTACTCTCA ATATGCCAGC AAATTTGGAA AACTCAACAG TTGCCACACG 2053                           |       |       |       |
| BovB_Hs-RTE-Hydrophis_spiralis | AACA -CGATG CAGT AAAAGT GCT -CACTCA ATTTGCCAGC AAATTTGGAA AACTCAACAG TGGCCACA-- 275                           |       |       |       |
| BovB_VA-RTE-Vipera_ammodytes   | AAGA -CAA TG CAGT AAAAGT GCTACTCTCA ATTTGCCAGC AAATTTGGAA AACTCAACAG TGGCCACA-- 1865                          |       |       |       |
| BovB_ACo-RTE-Agkistrodon_conto | AAGA -CGATG CAGT AAAAGT GCTACTCTCA ATTTGCCAGC AAATTTGGAA AACTCAACAG TGGCCACA-- 1865                           |       |       |       |
| BovB_Pg-RTE-Perameles_gunnii   | ----- -AT GTT----- -C AAATTTGGAA AACTCAACAG TAGCCACT-- 34                                                     |       |       |       |
| BovB_lo-RTE-Isodon_obesulus    | AAGA -TGATA CTGT TAAAGT ATTGCACTTT AAA----- -C TAATTTGGAA AACTAAACAG TGGTCACT-- 472                           |       |       |       |
| BovB_Bp-RTE-Burramys_parvulus  | AAGA -TGATG CTGT TAAAGT GCTGTACTCA ATATGCCAGC AAATTTGGAA AACTCAACAG TGGCCACT-- 564                            |       |       |       |
| BovB_VA-RTE-Petaurus_breviceps | AAGA -TGATG CTGT TAAAGT GCTGCACTCA ATATGCCAGC AAATTTGGAA AACTCAACAG TGACCACT-- 630                            |       |       |       |
| BovB_Ma-RTE-Macropus_antilopin | AAGA -TGATG CTGT TAAAGT GCTGCACTCA ATATGCCAGC AAATTTGGAA AACTCAACAG TGGCCACT-- 1979                           |       |       |       |
| BovB_Af-RTE-Antechinus_flavipe | AAGA TGATG CTGT CAAAGA GCTGCATTTA ATATGTTAA AAATTTAGAA AACTTAAAC TGACCACT-- 1201                              |       |       |       |
| BovB_Ac-RTE-Anolis_carolinensi | AAGA -TCATG CTGT CAAAGCT GATGCATGCA ATATGCCAGC AAATATGGAA AACACAAAAA TGGCCATC-- 1834                          |       |       |       |
| BovB_BM-RTE-Bombyx_mori        | AGCGACG CAG GAATAGATGT ACTGCATAAA ATCTGCCAATC ATATCTGGCA GAATGGTGAA TGGCCGGA-- 1699                           |       |       |       |
| BovB_Dr-RTE-Christinus         | AATTC CCG - - - - - ATTCATGT ATTAACAACG CTGTGTGCAG AGATATGGAA GACCAATCA TGGCCTAA-- 1731                       |       |       |       |
| BovB_La-RTE-Loxodonta_africana | GATGCAGCG TGG - - - AAGT GCTCACTCGT CTATGCCAAG AAATATGGAA GACAGCTACC TGGCCAAC-- 1860                          |       |       |       |
| BovB_Pc-RTE-Procavia_capensis  | GATGCAGCAC TGG - - - AAGT GCTCACTCAT CTATGCCAAG AAATTTGGAG GACAGCTACC TGGCCAAC-- 1860                         |       |       |       |
| BovB_Et-RTE-Christinus         | GA - - - AGCAC TGG - - - AAGC ACTCACTTGT CTATACCAGG AAATTTGGAA GACAGGCACT TGGCCAAG-- 1658                     |       |       |       |
| BovB_Ta-RTE-Tachyglossus_acule | GAGAGGAAAT CCGT TAAAGT CTTACCAAAA TTATGTCAAC AGGTATGGCT AACCACTCAA TGGCCATC-- 2000                            |       |       |       |
| BovB_Plat-RTE-Ornithorhynchus  | GGAGAGGAAAT CCGT TAAAGT CTTACCAAAA TTATGTCAAC AGGTATGGCT AACCACTCAA TGGCCATC-- 1989                           |       |       |       |
| BovB_Ec-RTE-Equus_caballus     | GAGACTGAAT CTGT CAAAAA CCTAACAAAGA ATATGCCAAC AAATATGGAA AACAAAACAA TGGCCTAC-- 1759                           |       |       |       |
| BovB_Cg-RTE-Christinus         | GAAA TAGAAT ATAT CAAAAA CTTAACAAAGA ATATGCCAAC AAAAAATGGAA AACAAAACAA TGGCCTAT-- 1279                         |       |       |       |
| BovB_Bh-RTE-Bothriocroton_hydr | GGAAAGGAA ATGGCAATCC ACTCCAGTAG TCCTGCCAA - - - - - GAAA ACCCGATGAA TTGCAGAACT 311                            |       |       |       |
| BovB_MI-RTE-Gehyra_variegata   | GAAA - - - - - AGAGC AGGAACACAA ACTGGCTAAC TAAT - - - GAG GCTTTACAAA TAGCTGAG-- 387                           |       |       |       |
| Sly-rnd1_family284-LINE/RTEBov | -----                                                                                                         | ----- | ----- | ----- |
| Sly-rnd5_family2019-LINE/RTEBo | -----                                                                                                         | ----- | ----- | ----- |
| Sly-rnd3_family322-LINE/RTEBov | -----                                                                                                         | ----- | ----- | ----- |
| Sly-rnd5_family1698-LINE/RTEBo | -----                                                                                                         | ----- | ----- | ----- |
| Sly-rnd1_family795-LINE/RTEBov | -----                                                                                                         | ----- | ----- | ----- |
| Stu-rnd-5_family-3162_LINE_RTE | AAGAAGGAGG ACCACTTGGT NACCTTTCGT AGCNCGGTGG CTAAGACCCA GATAGATTAC TTACTCCTTA 1537                             |       |       |       |
| Sly-rnd6_family1960-LINE/RTEBo | A - - - AGGAGG ATCACTTGGT TACCTTCCGT AGCACGGTGG NTAAGACTCA NATAGATTAC TTACTCCTTA 708                          |       |       |       |
| Stu-rnd-5_family-2493_LINE_RTE | -----                                                                                                         | ----- | ----- | ----- |
| Sly-rnd5_family447-LINE/RTEBov | -----                                                                                                         | ----- | ----- | ----- |
| Stu-rnd-6_family-2093_LINE_RTE | -----                                                                                                         | ----- | ----- | ----- |
| Consensus                      | AA - A - - GA - - - - G - - AAAGT - CT - - - - T - A ATATGCCA - C AAAT - TGGAA AAC - - A - CA - TGGCCAC - - - |       |       |       |

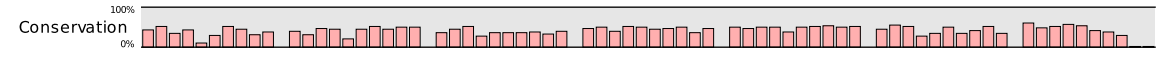

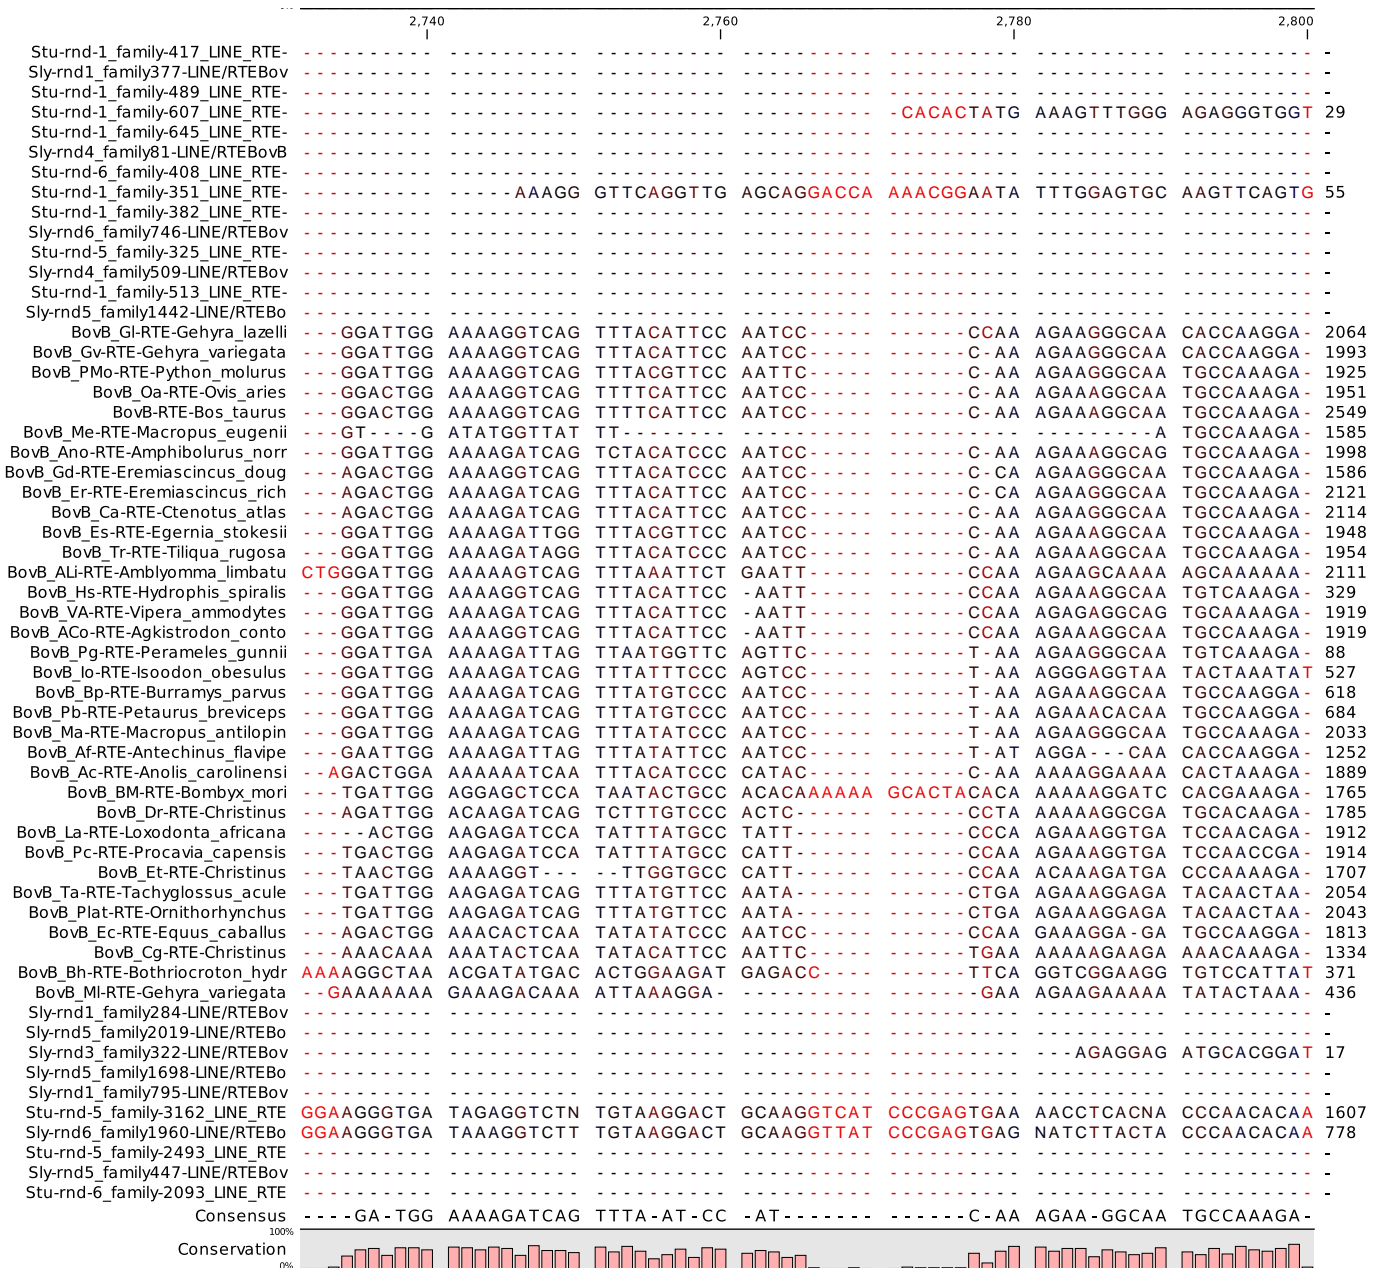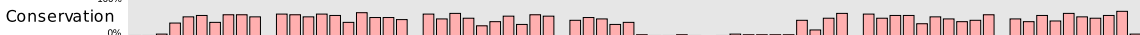



|                                | 2,820       | 2,840       | 2,860      |              |
|--------------------------------|-------------|-------------|------------|--------------|
| Stu-rnd-1_family-417_LINE_RTE  | -----       | -----       | -----      | -----        |
| Sly-rnd1_family377-LINE/RTEBov | -----       | -----       | -----      | -----        |
| Stu-rnd-1_family-489_LINE_RTE  | -----       | -----       | -----      | -----        |
| Stu-rnd-1_family-607_LINE_RTE  | GGAGATGAGG  | GTGAGGAGAG  | GGGTGTCCAT | TTCCGAGAAC   |
| Stu-rnd-1_family-645_LINE_RTE  | -----       | -----       | -----      | -----        |
| Sly-rnd4_family81-LINE/RTEBov  | -----       | -----       | -----      | -----        |
| Stu-rnd-6_family-408_LINE_RTE  | -----       | -----       | -----      | -----        |
| Stu-rnd-1_family-351_LINE_RTE  | ACGCGACGCA  | TGAGGCGGAC  | GTGGAAGTGA | GGCTTGACGC   |
| Stu-rnd-1_family-382_LINE_RTE  | -----       | -----       | -----      | -----        |
| Sly-rnd6_family746-LINE/RTEBov | -----       | -----       | -----      | -----        |
| Stu-rnd-5_family-325_LINE_RTE  | -----       | -----       | -----      | -----        |
| Sly-rnd4_family509-LINE/RTEBov | -----       | -----       | -----      | -----        |
| Stu-rnd-1_family-513_LINE_RTE  | -----       | -----       | -----      | -----        |
| Sly-rnd5_family1442-LINE/RTEBo | -----       | -----       | -----      | -----        |
| BovB_GI-RTE-Gehyra_lazelli     | ----ATGTTT  | CAACTATCGC  | A-CAATTGCA | CTCATTTTCC   |
| BovB_Gv-RTE-Gehyra_variegata   | ----ATGTTT  | CAACTATTGC  | A-CAATTGCA | CTCATTTTCC   |
| BovB_PMo-RTE-Python_molurus    | ----ATGTTT  | AAACTATCGC  | A-CAATTGCA | CTCATTTTCC   |
| BovB_Oa-RTE-Ovis_aries         | ----ATGTTT  | AAACTACCAC  | A-CAATTGCA | CTCATTTTCC   |
| BovB-RTE-Bos_taurus            | ----ATGTTT  | AAACTACCGC  | A-CAATTGCA | CTCATTTTCC   |
| BovB_Me-RTE-Macropus_eugenii   | ----ATCTTC  | CAGGTACAAA  | A-CAAAAACA | CTCACTTCC    |
| BovB_Ano-RTE-Amphibolurus_norr | ----ATGTTT  | CAACTACCGT  | A-CAATTGCA | CTCATTTTCC   |
| BovB_Gd-RTE-Eremiascincus_doug | ----TTGTTT  | CAACTACCGC  | A-CCATTGCA | CTCATTTTCC   |
| BovB_Er-RTE-Eremiascincus_rich | ----TTGTTT  | CAACTACCGC  | A-CCATTGCA | CTCATTTTCC   |
| BovB_Ca-RTE-Ctenotus_atlas     | ----TTGTTT  | GAACTACCGC  | A-CCATTGCA | CTCATTTTCC   |
| BovB_Es-RTE-Egernia_stokesii   | ----AAGTTT  | AAACCACCGC  | G-CAATTGCG | CTTATTTTCC   |
| BovB_Tr-RTE-Tiliqua_rugosa     | ----ATGTTT  | AAACTACCGC  | A-CAACTGCG | CTTATTTTCC   |
| BovB_ALi-RTE-Amblyomma_limbatu | ----TTGTTT  | AAACTACCGC  | A-CCATTGCA | CTAATTTTAC   |
| BovB_Hs-RTE-Hydrophis_spiralis | ----ATGTTT  | AAATTATTGC  | A-CCATTGCA | CTCATTTTCC   |
| BovB_VA-RTE-Vipera_ammodytes   | ----ATGTTT  | AAACTATCGC  | A-CCATTGCA | CTCATTTTCC   |
| BovB_ACo-RTE-Agkistrodon_conto | ----ATGTTT  | AAACTATCGC  | A-CCATTGCA | CTCATTTTCC   |
| BovB_Pg-RTE-Perameles_gunnii   | ----ATGTTT  | AAATTAATGA  | A-CTATTGTT | -----        |
| BovB_lo-RTE-Isodon_obesulus    | AACTGTGCTT  | ATTTCAAGAA  | G-TTCATGC- | -----        |
| BovB_Bp-RTE-Burramys_parvulus  | ----ATGTTT  | AAATTAATGA  | A-CAATTGCA | CTCATTTTCC   |
| BovB_VA-RTE-Petaurus_breviceps | ----ATGTTT  | AAATTAATGA  | A-CAATTGCA | CTCATTTTCC   |
| BovB_Ma-RTE-Macropus_antilopin | ----ATGTTT  | AAATTAATGA  | A-CAATTGCA | CTCATTTTCC   |
| BovB_Af-RTE-Antechinus_flavipe | ----ATGTTT  | ACATTAATGA  | A-CAATTGCA | CTCATTTTCC   |
| BovB_Ac-RTE-Anolis_carolinensi | ----ATGTTT  | AAACTTCCGT  | A-CAGTGGCA | CTTATTTTCC   |
| BovB_BM-RTE-Bombyx_mori        | ----CTGTAA  | CAACTATCGG  | A-CCCTTGCT | CTTATTTTCC   |
| BovB_Dr-RTE-Christinus         | ----ATGCTG  | CAACTATCAG  | A-CAATCGCG | CTCATTTTCC   |
| BovB_La-RTE-Loxodonta_africana | ----ATGCGG  | AAATTAATGA  | A-CAATATCA | TTAATATCAC   |
| BovB_Pc-RTE-Procavia_capensis  | ----ATGTGG  | AAATTAATGA  | A-CAATATCA | TTAATATCAC   |
| BovB_Et-RTE-Christinus         | ----ATA---  | -----GA     | A-CAATATCC | TTA-TATCAC   |
| BovB_Ta-RTE-Tachyglossus_acule | ----ATGTGA  | CAATTAATCGT | A-CAATTTCC | TTGATCTCAC   |
| BovB_Plat-RTE-Ornithorhynchus  | ----ATGCGA  | CAATTAATCGT | A-CAGTTTCC | TTGATCTCAC   |
| BovB_Ec-RTE-Equus_caballus     | ----GTGCAG  | TAACATATAGG | A-CCATTGCT | CTAATTTTCC   |
| BovB_Cg-RTE-Christinus         | ----CTGCAG  | CAACTATCAG  | A-CCATTGCA | TTAATTTTCC   |
| BovB_Bh-RTE-Bothriocroton_hydr | GCTACTGGGG  | GAAGAGCAGA  | G-CAGGAGTA | CTGA- - -CAC |
| BovB_MI-RTE-Gehyra_variegata   | ----TTG---  | ---AATGTAGA | ATTAAGTTC- | TTAATATCAC   |
| Sly-rnd1_family284-LINE/RTEBov | -----       | -----       | -----      | -----        |
| Sly-rnd5_family2019-LINE/RTEBo | -----       | -----       | -----      | -----        |
| Sly-rnd3_family322-LINE/RTEBov | GGCCCAA TGA | GGAGGTGCGA  | GANGTTGGCT | ATGGATGGAT   |
| Sly-rnd5_family1698-LINE/RTEBo | -----       | -----       | -----      | -----        |
| Sly-rnd1_family795-LINE/RTEBov | -----       | -----       | -----      | -----        |
| Stu-rnd-5_family-3162_LINE_RTE | GCTTTTGGTG  | ATGGACCTGG  | AGATTAAGAG | GGAGAGGAGG   |
| Sly-rnd6_family1960-LINE/RTEBo | GCTCNTTGGC  | ATGGATTTGG  | AGATTAAGAG | GGAGATGAGG   |
| Stu-rnd-5_family-2493_LINE_RTE | -----       | -----       | -----      | -----        |
| Sly-rnd5_family447-LINE/RTEBov | -----       | -----       | -----      | -----        |
| Stu-rnd-6_family-2093_LINE_RTE | -----       | -----       | -----      | -----        |
| Consensus                      | ----ATGTTT  | -AA-TA-CG-  | A-CAATTGCA | CT-ATTTTCC   |

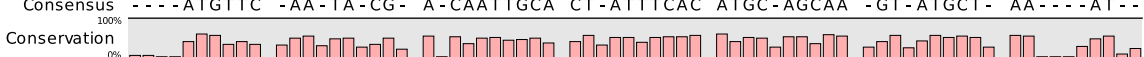



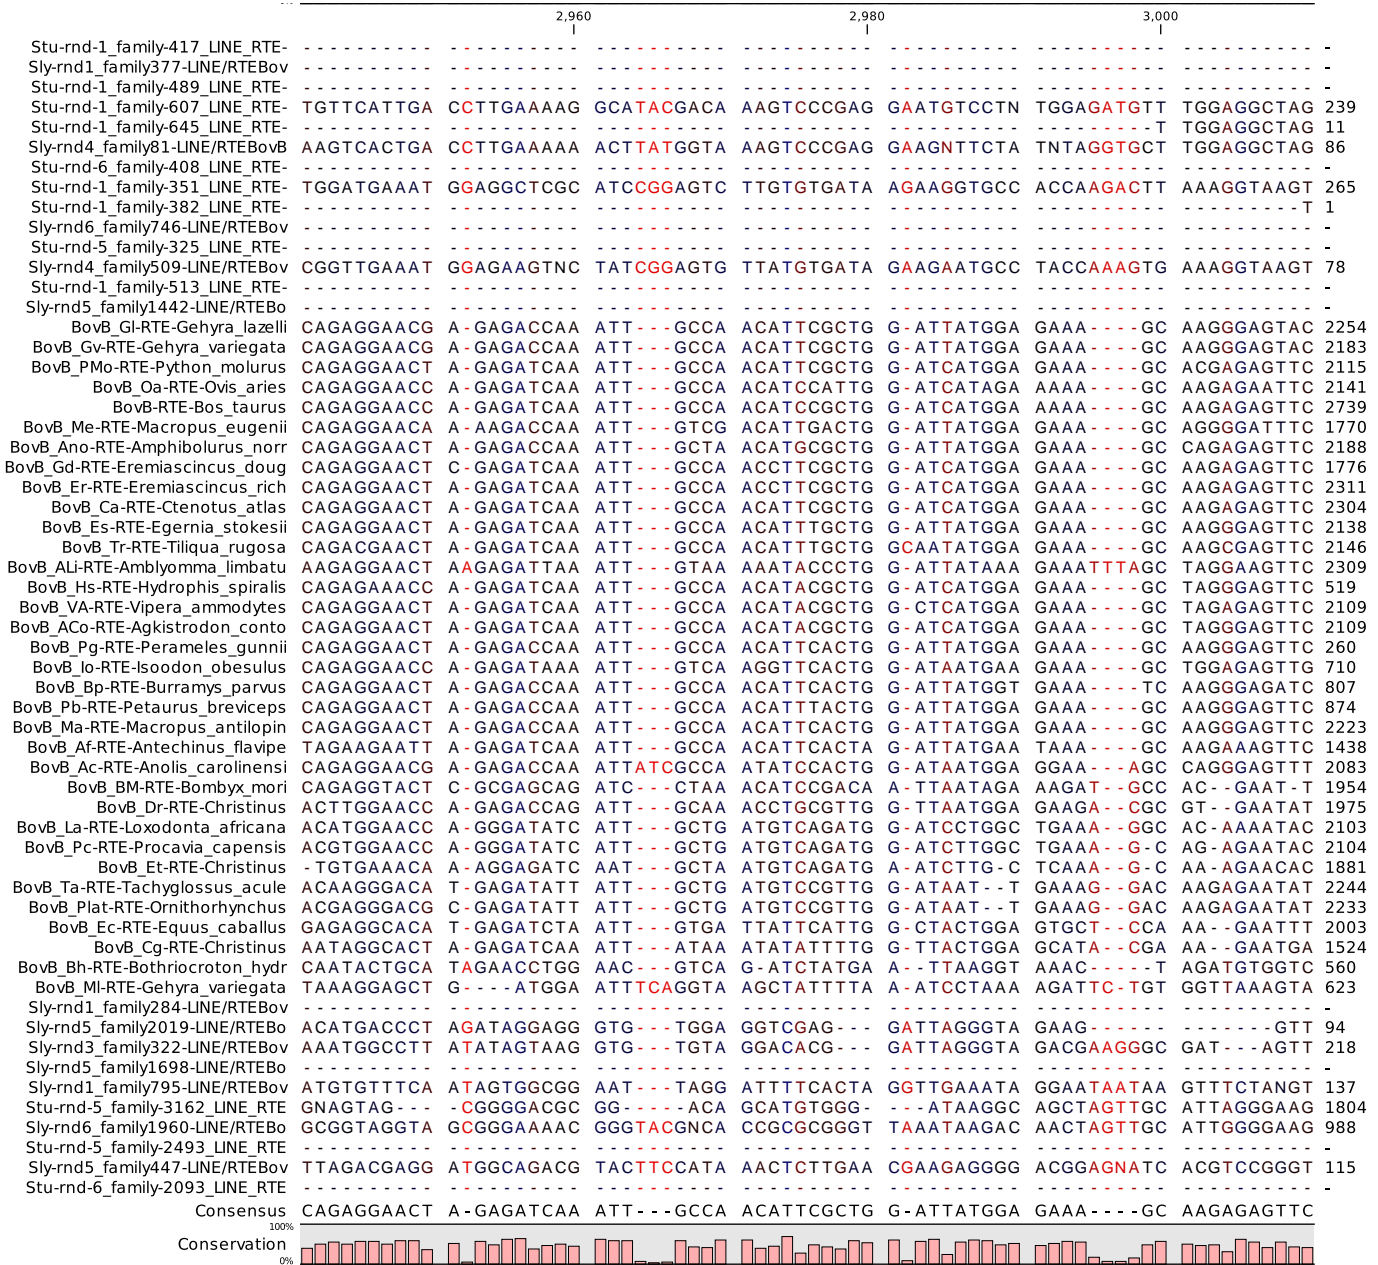

|                                 | 3,020                 | 3,040                 | 3,060                 | 3,080        |                             |
|---------------------------------|-----------------------|-----------------------|-----------------------|--------------|-----------------------------|
| Stu-rnd-1_family417_LINE_RTE    | -----                 | -----                 | -----                 | -----        | -----GTGG TGGACAAGAT 14     |
| Sly-rnd1_family377-LINE/RTEBov  | -----                 | -----                 | -----                 | -----        | -----                       |
| Stu-rnd-1_family489_LINE_RTE    | -----                 | -----                 | -----                 | -----        | -----                       |
| Stu-rnd-1_family607_LINE_RTE    | AGGTGTACCG GTGGCTTACA | TTAGGGCGAT NAAGGACATG | TACGATGGAG -CCAAGACTC | GGGTNAGAAC   | 308                         |
| Stu-rnd-1_family645_LINE_RTE    | AGGTGTACCG GTGGCTTACA | TTAGGGCGAT NAAGGACATG | TACGATGGAG -CCAAGACTC | GGGTNAGAAC   | 80                          |
| Sly-rnd4_family81-LINE/RTEBovB  | AGGTGTACTT GTGGCNTACA | CTAGGGCGAT TAAAGACATG | TATGATGGAG -CCAAGACTC | GGGTAAGAAT   | 155                         |
| Stu-rnd-6_family408_LINE_RTE    | -----                 | -----                 | -----AAG              | -ACGTCACTA   | CGGTGAGAAC 22               |
| Stu-rnd-1_family351_LINE_RTE    | TCTACAGAGT GGTGGTTAGA | CCGACTTTGT TGTATGGGGC | GGAGTGTGG CCAGTCAAGA  | ACTCNCACGT   | 335                         |
| Stu-rnd-1_family382_LINE_RTE    | TCTACAGAGT GGTGGTTAGA | CCGACTTTGT TGTATGGGGC | GGAGTGTGG CCAGTCAAGA  | ACTCNCACGT   | 71                          |
| Sly-rnd6_family746-LINE/RTEBov  | -----                 | -----                 | -----                 | -----        | -----                       |
| Stu-rnd-5_family325_LINE_RTE    | -----                 | -----                 | -----                 | -----        | -----                       |
| Sly-rnd4_family509-LINE/RTEBov  | TTTACGAAAC AGTTGTAAGA | CCGACAATGT TATATGAGAG | TGAATGTTGG GCCGCTAAAG | TCCAACATAT   | 148                         |
| Stu-rnd-1_family513_LINE_RTE    | -----                 | -----                 | -----                 | -----        | -----                       |
| Sly-rnd5_family1442-LINE/RTEBov | -----                 | -----                 | -----                 | -----        | -----                       |
| BovB_GI-RTE-Gehyra_lazelli      | CAGAAAAAC -           | CTACT-TCTG            | CTTCATTGAC            | TATGCTAAAG   | -CCTTTGATT GTGTGG - 2309    |
| BovB_Gv-RTE-Gehyra_variegata    | CAGAAAAAC -           | CTACT-TCTG            | CTTCATTGAC            | TATGCTAAAG   | -CCTTTGATT GTGTGG - 2238    |
| BovB_PMo-RTE-Python_molurus     | CAGAAAAAT -           | CTACT-TCTG            | CTTCATTGAC            | TATGCAAAAAG  | -CCTTTGATT GTGTGG - 2170    |
| BovB_Oa-RTE-Ovis_aries          | CAGAAAAAC -           | CTACT-TCTG            | CTTCATTGAC            | TATGCCAAAG   | -CCTTTGACT GTGTGG - 2196    |
| BovB-RTE-Bos_taurus             | CAGAAAAAC -           | CTATT-TCTG            | CTTTATTGAC            | TATGCCAAAG   | -CCTTTGACT GTGTGG - 2794    |
| BovB_Me-RTE-Macropus_eugenii    | CAGGGAAAGC -          | AAG ATACT-TCTG        | CTTCATAGAC            | TACACGAAAAG  | -CCTTTGACT TTGCAG - 1827    |
| BovB_Ano-RTE-Amphibolurus_norr  | CAGAAAAAT -           | CTACT-TCTG            | CTTCATTGAC            | TATGCAAAAAG  | -CCTTTGACT GTGTGG - 2243    |
| BovB_Gd-RTE-Eremiascincus_doug  | CAGAAAAA -            | CAT CTACC-TCTG        | CTTCATTGAC            | TATGCTAAAAG  | -CCTTTGATT GTGTGG - 1831    |
| BovB_Er-RTE-Eremiascincus_rich  | CAGAAAAA -            | CAT CTACC-TCTG        | CTTCATTGAC            | TATGCTAAAAG  | -CCTTTGATT GTGTGG - 2366    |
| BovB_Ca-RTE-Ctenotus_atlas      | CAGAAAAA -            | CAT CTACC-TCTG        | CTTCATTGAC            | TATGCTAAAAG  | -CCTTTGATT GTGTGG - 2359    |
| BovB_Es-RTE-Egernia_stokesii    | CAGAAAAA -            | CAT CTACT-TCTG        | CTTCACTGAC            | TACGCTAAAAG  | -CCTTTGATT GTGTGG - 2194    |
| BovB_Tr-RTE-Tiliqua_rugosa      | CAGAAAAA -            | CAT CTACA-TCTG        | CTTCATTGAC            | TACACTAAAAG  | -CCTTTGATT GTGTGG - 2201    |
| BovB_ALi-RTE-Amblyomma_limbatu  | TAGAAAAA -            | CAATT-TTTA            | CTTCTTAAT             | AAAATTAAT    | ACTTTTAATA TTTTATAAT 2369   |
| BovB_Hs-RTE-Hydrophis_spiralis  | CAGAAAAAC -           | CTACT-TCTG            | CTTCATTGAC            | TATGCTAAAAG  | -CCTTTGATT GTGTGG - 574     |
| BovB_VA-RTE-Vipera_ammodytes    | CAGAAAAAC -           | CTACT-TCTG            | CTTCATTGAC            | TATGCTAAAAG  | -CCTTTGATT GTGTGG - 2164    |
| BovB_ACo-RTE-Agkistrodon_conto  | CAGAAAAAC -           | CTACT-TCTG            | CTTCATTGAC            | TATGCTAAAAG  | -CCTTTGATT GTGTGG - 2164    |
| BovB_Pg-RTE-Perameles_gunnii    | CAGAAAAA TA TCTTCTTA  | CTACT-TCTG            | CTTCATTGAC            | TACACTAAAAG  | -CCTTTGATT GTGTGG - 325     |
| BovB_Io-RTE-Isodon_obesulus     | TAGAAAAA AC AAT -     | CTGCT-TTTG            | CTACTTTTTT            | TACATTAGAA   | -CCTTTGACT GTG - 764        |
| BovB_Bp-RTE-Burramys_parvulus   | CAGAAAAA -            | T CTATT-TCTG          | CTTCATTAAC            | TACACTAAAAG  | -CCTTTGACT GTATGA - 861     |
| BovB_VA-RTE-Petaurus_breviceps  | CAGAAAAA GCA -        | T CTACT-TCTG          | CTTCATTGAC            | TACACTAAAAG  | -CCTTTGACT GTGTG - 931      |
| BovB_Ma-RTE-Macropus_antilopin  | CAGAAAAA CA -         | T CTACT-TCTG          | CTTCATTGAC            | TACACTAAAAG  | -CCTTTGACT GTGTG - 2277     |
| BovB_Af-RTE-Antechinus_flavipe  | CAGAAAAA CA -         | T CCATC-ATAG          | C-ATGCTGCT            | TTCAATTA -   | -CCTTTGACC ATGTA - 1488     |
| BovB_Ac-RTE-Anolis_carolinensi  | CAGAAAAA AC -         | AT CTACT-TCTG         | CTTTATTGAC            | TATTCCAAAG   | -CCTTCGACT GCGTGG - 2139    |
| BovB_BM-RTE-Bombyx_mori         | CGATACACC -           | TA TTACTCTGTG         | CTTCGTTGAC            | TACAGCAAAG   | -CGTTTGACT GCGTTG - 2010    |
| BovB_Dr-RTE-Christinus          | CAAAAGAAC -           | GT GTATA-TGTG         | CTTCATCGAC            | TACAGCAAAG   | -CCTTCGACT GTGTCA - 2030    |
| BovB_La-RTE-Loxodonta_africana  | CAGAAAGAT -           | GT TTACC-TGTG         | TTTTATTGAC            | TATGCAAAGG   | -CATTTCGACT GTGTGG - 2158   |
| BovB_Pc-RTE-Procavia_capensis   | CAGAAAGAT -           | GT TTACT-TGTG         | TTTTATTGAC            | TATGCAAAGG   | -CATTTCGACT GTGTGG - 2159   |
| BovB_Et-RTE-Christinus          | CAGAAAGAT -           | GT TTACT-TCAG         | TTTTACTGAC            | TATGCAAAGG   | -CATTTCG - T GGGTGG - 1934  |
| BovB-Ta-RTE-Tachyglossus_acule  | CAAAAGGAA -           | GT CAGCA-TGTG         | CTTTATTGAT            | TATAGTAAAG   | -CCTTTGACT GTGTGG - 2299    |
| BovB_Plat-RTE-Ornithorhynchus   | CAAAAGGAA -           | GT CAGCA-TGTG         | CTTTATTGAT            | TATAGTAAAG   | -CCTTTGACT GCGTGG - 2288    |
| BovB_Ec-RTE-Equus_caballus      | CAGAAGAAG -           | GT TAGTC-TATG         | TTTTATAGAC            | TACAGTAAAG   | -CCTTTGACT GCA TGG - 2058   |
| BovB_Cg-RTE-Christinus          | CAGAAGAAG -           | AT CAGCT-TGTG         | TTTTAAAGAA            | TACAGTAAAG   | -TTTTTGACA ACATGG - 1579    |
| BovB_Bh-RTE-Bothriocroton_hydr  | AAACGCGAGA -          | TGT CAAGACTGAA        | C - - ATCGAC          | ATCATGGGAA   | TTAGTCAACT AAA - 613        |
| BovB_MI-RTE-Gehyra_variegata    | CAGGACCCA -           | AT GTGCCAGCAA         | ATTTGAAAA             | CTCTACAGTG   | ATCACTGTT TAGAAA - 680      |
| Sly-rnd1_family284-LINE/RTEBov  | -----                 | -----                 | -----                 | -----        | -----                       |
| Sly-rnd5_family2019-LINE/RTEBo  | AGTAGGTAGT -          | C GAGTCTTGTC          | TTGTTTTTCG            | ACGGGTTA -   | GTAGGTTAGT TGGTATT - 150    |
| Sly-rnd3_family322-LINE/RTEBov  | NGTAGGACTN -          | A GGGTGCATC           | CTGCNTTACN            | ATTAGTCG - T | ACNANTGTAT TAGTNTG - 276    |
| Sly-rnd5_family1698-LINE/RTEBo  | -----                 | -----                 | -----                 | -----        | -----                       |
| Sly-rnd1_family795-LINE/RTEBov  | TTTGGATAAC -          | T AAAACAACAC          | TTATTTTACT            | TGGATTTGAT   | ACACTTGAGT TGTGGTC - 196    |
| Stu-rnd-5_family3162_LINE_RTE   | TNGCTTTAA GGTGTTAGGG  | GTNTC-GAGG            | GGTAAAT -             | -CCGNGGAC    | ATAGAGGAGA TTG-GTGGTG 1868  |
| Sly-rnd6_family1960-LINE/RTEBo  | AAGCTACAAA GGTGCAAAAG | GTATC-GAGG            | GGTATGTACC            | TCTAGTCGAG   | ATCAGAGGAGA CTGAGTGGTG 1057 |
| Stu-rnd-5_family2493_LINE_RTE   | -----                 | -----                 | -----                 | -----        | -----                       |
| Sly-rnd5_family447-LINE/RTEBov  | GATTTGGAGC ACTCCGAGAG | ACGTC-GNGA            | TTTCGGG -             | - TANTGTAG   | GTGTATAAAG TTAGGTTGGA 179   |
| Stu-rnd-6_family2093_LINE_RTE   | -----                 | -----                 | -----                 | -----        | -----                       |
| Consensus                       | CAGAAAAA -            | AT CTACT-TCTG         | CTTCATTGAC            | TATGCTAAAAG  | -CCTTTGACT GTGTGG -         |

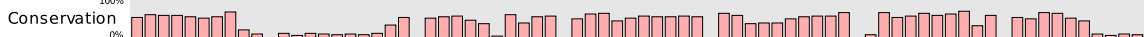



|                                | 3,100      |            |            | 3,120       |            |             | 3,140      |      |
|--------------------------------|------------|------------|------------|-------------|------------|-------------|------------|------|
| Stu-rnd-1_family-417_LINE_RTE  | GAGGGAAGCG | AGACTGAGAT | GGTTCGGACA | TGTGAAGAGG  | AGATGCGCAG | ACGCCCCAGT  | GAGGAGGTGC | 84   |
| Sly-rnd1_family377-LINE/RTEBov | -----      | -----      | -----      | -----       | -----      | -----       | -----      | -    |
| Stu-rnd-1_family-489_LINE_RTE  | -----      | -----      | -----      | -----       | -----      | -----       | -----      | -    |
| Stu-rnd-1_family-607_LINE_RTE  | GGTGGGAGGA | GACTCGGAGC | ACTTCCCAGT | TGTGATGGGG  | TTGCACCAGG | GATCAACCCCT | TAGCCCGTTT | 378  |
| Stu-rnd-1_family-645_LINE_RTE  | GGTGGGAGGA | GACTCGGAGC | ACTTCCCAGT | CGTGTATGGG  | TTGCACCAGG | GATCAACCCCT | TAGCCCGTTT | 150  |
| Sly-rnd4_family81-LINE/RTEBovB | AGTGGGAGGA | GACTCGGAGC | ACTTCCCAGT | TGNATGGGG   | TTGCACCAGG | GATCAGCNC   | TAACCCGTTT | 225  |
| Stu-rnd-6_family-408_LINE_RTE  | AGTGGTAGGA | GATACAAAGG | AGTTTCCCAT | AATCGTGGCT  | TTACACTAGG | GATCGGCATT  | GATNNCNCTA | 92   |
| Stu-rnd-1_family-351_LINE_RTE  | TCAGAAGATG | AAAGTTGCGG | AAATGAGGAT | GTTGAGATGG  | ATGTGTGGGC | ATACTAGGAG  | AGATAAGATT | 405  |
| Stu-rnd-1_family-382_LINE_RTE  | TCAGAAGATG | AAAGTTGCGG | AAATGAGGAT | GTTGAGATGG  | ATGTGTGGGC | ATACTAGGAG  | AGATAAGATT | 141  |
| Sly-rnd6_family746-LINE/RTEBov | -----      | -----      | -----      | -----       | -----      | -----       | -----      | -    |
| Stu-rnd-5_family-325_LINE_RTE  | -----      | -----      | -----      | -----       | -----      | -----       | -----      | -    |
| Sly-rnd4_family509-LINE/RTEBov | CCACAAGACG | AGTGTGCTAG | AAATGCGGAT | GCTAAGATGG  | ATGTGCGGTC | ATACAAGATT  | AGACAAGATT | 218  |
| Stu-rnd-1_family-513_LINE_RTE  | -----      | -----      | -----      | -----       | -----      | -----       | -----      | -    |
| Sly-rnd5_family1442-LINE/RTEBo | -----      | -----      | -----      | -----       | -----      | -----       | -----      | -    |
| BovB_GI-RTE-Gehyra_lazelli     | -----ATCAC | ACCAACTATG | GCAAGTCTT  | AAAGAGATGG  | GAGTACCAGA | CCACCTCAC   | ACGTCTCTTG | 2374 |
| BovB_Gv-RTE-Gehyra_variegata   | -----ATCAC | ACCAACTATG | GCAAGTCTT  | AAAGAGATGG  | GAGTACCAGA | CCACCTCAC   | ACGTCTCTTG | 2303 |
| BovB_PMo-RTE-Python_molurus    | -----ATCAC | ACAAACTGTG | GCAAAATCTT | AAAGAGATGG  | GAGTACCAGA | CCACCTTAC   | CTGTCTCCTG | 2235 |
| BovB_Oa-RTE-Ovis_aries         | -----ATCAC | ACAAACTGTG | GAAAAATCTT | AAAGAGATGG  | GAATACCAGA | CCACCTTAC   | CTGCCTCCTG | 2261 |
| BovB-RTE-Bos_taurus            | -----ATCAC | ATAAACTGTG | GAAAAATCTG | AAAGAGATGG  | GAATACCAGA | CCACCTGAC   | CTGCCTCTTG | 2859 |
| BovB_Me-RTE-Macropus_eugenii   | -----ATCAC | ACAAAATATA | GCAAGTCTC  | AAAGAGATGG  | GAGCACTGCA | TCACCTTAC   | TTGCCT--G  | 1889 |
| BovB_Ano-RTE-Amphibolurus_norr | -----ACCAC | GCAAACATG  | GCAAGTCTT  | AAAGAAATGG  | GAGTGCCTGA | CCACCTTAT   | CTATCTCCTG | 2308 |
| BovB_Gd-RTE-Eremiascincus_doug | -----ATCAC | ACAAACTGTG | GCAAGTCTG  | GAAGAGATGG  | GAGTACCAGA | CCACCTGAT   | CTGTCTCTTG | 1896 |
| BovB_Er-RTE-Eremiascincus_rich | -----ATCAC | ACAAACTGTG | GCAAGTCTG  | GAAGAGATGG  | GAGTACCAGA | CCACCTGAT   | CTGTCTCTTG | 2431 |
| BovB_Ca-RTE-Ctenotus_atlas     | -----ATCAC | ACAAACTGTG | GCAAGTCTT  | GAAGAGATGG  | GAGTACCAGA | CCACCTCAT   | CTGTCTCTTG | 2424 |
| BovB_Es-RTE-Egernia_stokesii   | -----ATCAC | ACAAATTGTG | GCAAGTCTT  | AAAGAGATGG  | GAGTACCAA  | CCACCTTAT   | CTGTCTCCTG | 2259 |
| BovB_Tr-RTE-Tiliqua_rugosa     | -----ATCAC | ACAAATTGTG | GCAAGTCTT  | AAAGAGATGG  | GAGTACCAA  | CCACCTTAT   | CTGTCTCCTG | 2266 |
| BovB_ALI-RTE-Amblyomma_limbatu | ATCCAACACA | AAAAATAGTA | CCAAATTTT  | AGAGAGATGG  | GAGCACCAGG | CCATCTTAT   | TTGTCTCTTG | 2438 |
| BovB_Hs-RTE-Hydrophis_spiralis | -----AACAC | ACAAATTGTG | GCAAGTCTT  | AAAGAGATGG  | GAGTACCAGA | CCATCTTAT   | TTGTCTCTTG | 639  |
| BovB_VA-RTE-Vipera_ammodytes   | -----ATCAC | ACAAACTGTG | GCAAGTCTT  | AAAGAGATGG  | GAGTACCAGA | CCATCTTAT   | TTGTCTCTTG | 2229 |
| BovB_ACo-RTE-Agkistrodon_conto | -----ATCAC | ACAAATTGTG | GCAAGTCTT  | AAAGAGATGG  | GAGTACCAGA | CCATCTTAT   | TTGTCTCTTG | 2229 |
| BovB_Pg-RTE-Perameles_gunnii   | -----AATAC | ACAAATTGTG | ACACGGCTC  | AAAGAGATGG  | GAATACCAGA | TCATCTTAC   | TTGTCTCTTG | 391  |
| BovB_lo-RTE-Isodon_obesulus    | -----TTGCC | ACACAATT-- | GCAAGTCTC  | AAATAAGTGA  | AAATATCAA  | TCATCTTCC   | TTGTCTCTTG | 827  |
| BovB_Bp-RTE-Burramys_parvus    | -----GATCA | ACAAAATGTG | GCAAGTCTC  | AAAGAGATGG  | GAGTACCAGG | TCATCTCAC   | TTGTCTCTTG | 927  |
| BovB_VA-RTE-Petaurus_breviceps | -----GATCA | ACAAAATGTG | GCAAGTCTC  | AAAGAGATGG  | GAGTACCAGA | TCATCTTAC   | TTGTCTCTTG | 997  |
| BovB_Ma-RTE-Macropus_antilopin | -----GATCA | ACAAAATGTG | GCAAGTCTC  | AAAGAGATGG  | GAGTACCAGA | TCATCTTAC   | TTGTCTCTTG | 2343 |
| BovB_Af-RTE-Antechinus_flavipe | -----ACTTA | ACATA-TGT  | GGAAGTCTC  | AAAGAGATG   | ---TACTAGA | CCACCCTAC   | -TGCAGCCC  | 1548 |
| BovB_Ac-RTE-Anolis_carolinensi | -----ATCAT | ATAAACTATG | GCATGTTCT  | GGTGGTATGG  | GGATACCAAG | TCACCTTGT   | CTGTCTCCTG | 2204 |
| BovB_BM-RTE-Bombyx_mori        | -----GCTGG | ACTGCTTATG | GCGGTCTCT  | CAGGAACCTG  | GAGTACCCAT | GCACCTTAA   | -AGCTTTTCT | 2074 |
| BovB_Dr-RTE-Christinus         | -----ATCAT | GCGAGCTATG | GAAAATGTCT | AAGCAGATGG  | GATCCCGCA  | GCATTTAAT   | -AGATCTGAC | 2094 |
| BovB_La-RTE-Loxodonta_africana | -----ATCAT | ACAAAT-ATG | GATAACACTG | CGAAGAATGG  | GAATCCAGA  | ACACTTAAT   | -TGTGCTCAT | 2221 |
| BovB_Pc-RTE-Procavia_capensis  | -----ATCAT | CTAAATTATG | GCTAACATG  | TGGAGAATGG  | GAATCCAGA  | ACACCTAAT   | -TGTGCTCTT | 2223 |
| BovB_Et-RTE-Christinus         | -----ACCAT | ACAAACTACG | AAGAACAATC | AAAAGAATGG  | GAATCCACA  | ACACTTAT    | -TGTGCTAAT | 1998 |
| BovB_Ta-RTE-Tachyglossus_acule | -----ATCAG | AGAAACTCTG | GAGCACATTA | AGGAAAATGG  | GATGCTGGA  | CCATTTAAT   | -TGCATTAAT | 2363 |
| BovB_Plat-RTE-Ornithorhynchus  | -----ATCAG | AGAAACTCTG | GAGCACATTA | AGGAAAATGG  | GATGCTGGA  | CCATTTAAT   | -TGCATTAAT | 2352 |
| BovB_Ec-RTE-Equus_caballus     | -----ATCAT | AAAAGCTATG | GAGTGTCTG  | AAAGAAAATGG | GATGCTGGA  | GCACCTTAT   | -TGTGCTGAT | 2122 |
| BovB_Cg-RTE-Christinus         | -----ATCAT | AAAAGTATG  | GTTGGTTTT  | AAAGAAAATGG | ATATGCCACA | ACATCTGAT   | -TGTTTTATG | 1643 |
| BovB_Bh-RTE-Bothriocroton_hydr | -----AATAG | GCAGGA-ATG | GGAGAATTTA | TTTCAGATG   | ---ACCATT  | ACATCTACT   | -ACTATGGGC | 671  |
| BovB_MI-RTE-Gehyra_variegata   | -----TAATT | GTTTTATGT- | CCCAATCATA | AAGAAGAGCA  | AAATGTTAAA | TTACTGGAC   | -AATTTTATT | 742  |
| Sly-rnd1_family284-LINE/RTEBov | -----      | -----      | -----      | -----       | -----      | -----       | -----      | -    |
| Sly-rnd5_family2019-LINE/RTEBo | --CGGATATC | GTATTAGCC- | ---TATT-CT | CGTACGTATC  | TTGNTCCTTC | GATTTCCGTT  | --ATCACCTG | 211  |
| Sly-rnd3_family322-LINE/RTEBov | --CTGTACAT | CTAGTAGTCG | TAGTATTACT | CTTGTAGTTT  | CTTGTNCTTC | CTTTTCTGTT  | --ACTATTTA | 342  |
| Sly-rnd5_family1698-LINE/RTEBo | -----      | -----      | -----      | -----       | -----      | -----       | -----      | -    |
| Sly-rnd1_family795-LINE/RTEBov | --TTTCGAAA | ACAACTCTCT | TTTCAATACA | CAAGTAAACT  | AGGTAGTGTG | TACTCTAAC   | GGACAGTTTC | 264  |
| Stu-rnd-5_family-3162_LINE_RTE | GAATGGGAA  | GTCCAAGGCA | AAGTGAAGC  | GAAGAAGGCT  | GCGTACGCGA | AGTTGGCGGA  | GTTGGTAGAC | 1938 |
| Sly-rnd6_family1960-LINE/RTEBo | GAATGGTAA  | GTGNAAGGNA | AAGTGAAGC  | AAAGTAGGCG  | GCAATGCAA  | AGTTGGCGGA  | GTTGGTAGAC | 1127 |
| Stu-rnd-5_family-2493_LINE_RTE | GAGTAGGGGA | AGAGCGACCG | GACCGGATGA | GATTCCGGTG  | GAATTTTGA  | AGAGCGCAGA  | CAAGGCAGGT | 70   |
| Sly-rnd5_family447-LINE/RTEBov | GCGTAGGGGA | AGAGCGACCG | GGCCGGACGA | GATCCNGATG  | GAATTTTGA  | AGAGCGCGGG  | CAAGGCAGGT | 249  |
| Stu-rnd-6_family-2093_LINE_RTE | -----      | -----      | -----      | -----       | -----      | -----       | -----      | -    |
| Consensus                      | -----ATCAC | ACAAACTGTG | GCAAGTCTT  | AAAGAGATGG  | GAGTACCAGA | CCACCTTAT   | -TGTCTCCTG |      |

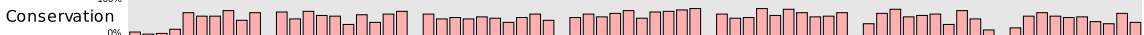

|                                | 3,160       | 3,180      | 3,200       | 3,220      |            |            |             |      |
|--------------------------------|-------------|------------|-------------|------------|------------|------------|-------------|------|
| Stu-rnd-1_family-417_LINE_RTE  | GAGAGGTTGG  | CTATAGTGGG | TNCGAGGAGA  | GGTAGAGGTA | GGCCGAAGA  | AGTATTGGGG | AGAGGTGATT  | 153  |
| Sly-rnd1_family377-LINE/RTEBov | -----       | -----      | -----       | -----      | -----AAGA  | AGTATTGGGG | AGAGGTGATT  | 24   |
| Stu-rnd-1_family-489_LINE_RTE  | -----       | -----      | TAAGGAGA    | GGTAGAGGTA | GGCCGAAGA  | AGTATTGGG  | AGAGGTGATT  | 46   |
| Stu-rnd-1_family-607_LINE_RTE  | TTATTTGCCT  | TGGTGATGGA | TGAATTGACG  | CGACATATTC | AAGANGAGG  | TGTCGTGGT  | TATGTTATTT  | 447  |
| Stu-rnd-1_family-645_LINE_RTE  | TTATTTGCCT  | TGGTGATGGA | TGAATTGACG  | CGACATATTC | AAGANGAGG  | TGTCATGGT  | TATGTTATTT  | 219  |
| Sly-rnd4_family81-LINE/RTEBovB | TTATTTGCCT  | TGGCGATGGA | TGAATTGACG  | CGGCATATTC | AAGGCGAGG  | TGCCATGGT  | TATGTTATTT  | 294  |
| Stu-rnd-6_family-408_LINE_RTE  | TTGCGTTGCC  | CAATNATA   | -----       | -----ATAC  | AAGATGAGG  | TCTCATGAT  | CATGCTATTT  | 143  |
| Stu-rnd-1_family-351_LINE_RTE  | AGGAAT--GA  | GGATATCCGG | GACAAGGTGG  | GAGTGGCCTC | CGTGGTGG   | CAAGATGAGG | GAGCGGAGAC  | 472  |
| Stu-rnd-1_family-382_LINE_RTE  | AGGAAT--GA  | AGATATCCGG | GACAAGGTGG  | GAGTGGCCTC | CGTGGTGG   | CAAGATGAGG | GAGCGGAGAC  | 208  |
| Sly-rnd6_family746-LINE/RTEBov | -----       | -----      | -----       | -----      | -----AGA   | CAAGATGAGG | GAGCGGAGG   | 23   |
| Stu-rnd-5_family-325_LINE_RTE  | AGAAANATGA  | TCACATTCCG | CAGAAGGTGC  | AAGTAGCAGC | CATNGAGGA  | TAAATGAGA  | GAGGTGCGCT  | 91   |
| Sly-rnd4_family509-LINE/RTEBov | AGAAAAC--GA | CCACGTTCCG | CAGAAGGTGC  | AAGTAGCACA | CATCGAGGA  | TAAATGAGA  | GATGTGCGCT  | 285  |
| Stu-rnd-1_family-513_LINE_RTE  | -----       | -----      | -----       | -----      | -----      | -----      | -----       | -    |
| Sly-rnd5_family1442-LINE/RTEBo | -----       | -----      | -----ATCT   | ACCGATCATG | CTTGCGAAA  | TGAAATGGAC | CCGAATAGAG  | 43   |
| BovB_GI-RTE-Gehyra_lazelli     | AGAAA--CCTG | T-ATAAG--G | GTCAAGAAGC  | AACAGTCC-G | AACCGGATA  | TGGAAC-AAC | TG-ATTGGTT  | 2436 |
| BovB_Gv-RTE-Gehyra_variegata   | AGAAA--CCTG | T-ATAAG--G | GTCAAGAAGC  | GACAGTCA-G | AACCGGATA  | TGGAAC-AAC | TG-ATTGGTT  | 2365 |
| BovB_PMo-RTE-Python_molurus    | AGAAA--TCTG | T-ATGCG--G | GCCAAGAAGC  | AACAGTTA-G | AACCGGTA   | TGGAAC-AAC | CG-ATTGGTT  | 2297 |
| BovB_Oa-RTE-Ovis_aries         | AGAAA--CCTG | T-ATGCA--G | GTCAAGAAGC  | AACAGTTA-G | AACCGGACA  | TGGAAC-AAC | AG-ACTGGTT  | 2323 |
| BovB-RTE-Bos_taurus            | AGAAA--TCTG | T-ATGCA--G | GTCAGGAAGC  | AACAGTTA-G | AACCTGGACA | TGGAAC-AAC | AG-ACTGGTT  | 2921 |
| BovB_Me-RTE-Macropus_eugenii   | AGGAA--CCTA | T-ATGTA--G | ATCAAGAAGC  | AACAGTTA-G | AACCAAACA  | TGGAAT-AAC | TG-ATTGGTT  | 1951 |
| BovB_Ano-RTE-Amphibolurus_norr | AGAAA--CCTA | T-ATGTG--G | GACAAGAAGC  | AACAGTTA-G | AACCTGGATA | TGGAAC-AAC | TG-ATTGGTT  | 2370 |
| BovB_Gd-RTE-Eremiascincus_doug | AGAAA--CCTG | T-ATGCG--G | GTCAGGAAGC  | AACAGTTA-G | AACCTGGACA | TGGAAC-AAC | CG-ACTGGTT  | 1958 |
| BovB_Er-RTE-Eremiascincus_rich | AGAAA--CCTG | T-ATGCG--G | GTCAGGAAGC  | AACAGTTA-G | AACCTGGACA | TGGAAC-AAC | CG-ACTGGTT  | 2493 |
| BovB_Ca-RTE-Ctenotus_atlas     | AGAAA--CCTG | T-ATGTG--G | GCCAAGAAGC  | AACAGTTA-G | AACCTGGACA | TGGAAC-AAC | TG-ATTGGTT  | 2486 |
| BovB_Es-RTE-Egernia_stokesii   | AGAAA--TCTG | T-ATGCG--G | GTCAAGAAGC  | AACCGTTA-G | AACCAGATA  | TGGAAC-AAC | TG-ATTGGTT  | 2321 |
| BovB_Tr-RTE-Tiliqua_rugosa     | AGAAA--CCTG | C-ATGAA--A | GTCAGAAGC   | AACAGTTA-G | AACCAGATA  | TGGAACCAAA | TA-ATTGGTT  | 2329 |
| BovB_ALi-RTE-Amblyomma_limbatu | AGAAA--CCTA | T-ATGCA--G | GTCAAGAGGC  | AACAGTGA-G | AACCTGGACA | TGGAAC-AAC | TG-ATTGGTT  | 2500 |
| BovB_Hs-RTE-Hydrophis_spiralis | AAAAAACCTA  | T-ATGCG--G | GTCAGAAGC   | AACAGTGA-C | AACCTAGACA | TGGAAC-CAC | TG-ATTGGTT  | 702  |
| BovB_VA-RTE-Vipera_ammodytes   | AGAAA--CCTA | T-ATGCG--G | GCCAAGAAGC  | AACAGTGA-G | AACCTGGACA | CGGAAC-CAC | TG-ATTGGTT  | 2291 |
| BovB_ACo-RTE-Agkistrodon_conto | AGAAA--CCTA | T-ATGCG--G | GTCAGAAGC   | AACAGTGA-G | AACCTGGACA | CGGAAC-CAC | TG-ATTGGTT  | 2291 |
| BovB_Pg-RTE-Perameles_gunnii   | AGGAA--TCTG | TTACATG--G | ACCAAGAAAT  | AACAGTTA-A | AATTGAACA  | TGGAAC-AGC | TG-ATAGATT  | 454  |
| BovB_Io-RTE-Isodon_obesulus    | AGGAA--CTTG | T-ATGTG--G | GCCAAGAAGC  | AATAGTTA-A | AACCTGAATA | TGGAAC-AAC | TA-ATTGGAT  | 890  |
| BovB_Bp-RTE-Burramys_parvulus  | AGGAA--CCTG | T-ATATGCCA | GCCAAGAAGC  | AGCAGTTA-G | AACCAAACA  | TGGAAC-AAT | TG-ATTGGTT  | 991  |
| BovB_Pb-RTE-Petaurus_breviceps | AGGAA--CCTG | T-ATGTG--G | GGCAAGAAGC  | AACAGTTA-G | AACCAAACA  | TGGAAC-AAC | TG-ATTGGTT  | 1058 |
| BovB_Ma-RTE-Macropus_antilopin | AGGAA--CCTG | T-ATGTG--G | GCCAAGAAGC  | AACAGTTA-G | AACCTGAACA | TGGAAC-AAC | TG-ATTGGTT  | 2405 |
| BovB_Af-RTE-Antechinus_flavipe | AGGAA--CATG | A-ATGTG--G | ATCAAGAAGT  | AA-AGATA-C | AACCTAAACA | TGCAAC-AAC | TA-ATTGCTT  | 1609 |
| BovB_Ac-RTE-Anolis_carolinensi | AGAAA--TCTG | T-ATAAA--G | ACCAAGTAGC  | CACAATAA-G | AACAGACCA  | CGGAAC-AAC | AG-ACTGGTT  | 2266 |
| BovB_BM-RTE-Bombyx_mori        | CCAATCCCTT  | T-ACAT--G  | GCAGTCAGGG  | CACGTAA-G  | GGTCGACTA  | CACATA-GTC | AA-ACCGTTT  | 2137 |
| BovB_Dr-RTE-Christinus         | ACAACTCACTC | T-ATAAG--A | ATCAAAGGC   | CACGGTCA-G | GACAGCATT  | TGGCAA-CAC | TG-ACTGGTT  | 2157 |
| BovB_La-RTE-Loxodonta_africana | GAGGAACCTG  | T-ACATA--G | ATCAAGAGGC  | AGTCGTTG   | AACAGAACA  | AGGGGA-TAC | TG-AGTGGTT  | 2284 |
| BovB_Pc-RTE-Procavia_capensis  | AAGGAATCTG  | T-ATATG--G | ATCAAGAGGC  | AGTCGTTG   | AACAGAACA  | AGGGGA-CAC | TG-CATGGTT  | 2286 |
| BovB_Et-RTE-Christinus         | GCA-AACTTG  | T-ACATG--G | ATCAAGAGAC  | AGTGGTGG-G | AATAGAACA  | AAGGAA-TAC | TG-AACAGCT  | 2060 |
| BovB-Ta-RTE-Tachyglossus_acule | ATGGAACCTG  | T-ATGCC--A | AACAGGAGGC  | TACAATAA-G | AACAGAATA  | TGGAGA-AAC | AG-ATTGGTT  | 2426 |
| BovB_Plat-RTE-Ornithorhynchus  | ACGGAACCTG  | T-ATGAC--G | AACAGGAGGC  | TACAATAA-G | AACAGAATA  | TGGAGA-AAC | AG-ATTGGTT  | 2415 |
| BovB_Ec-RTE-Equus_caballus     | GCGTAACCTG  | T-ATTGT--G | GACAAGAAGC  | CACGTGCA-G | GACAGAATA  | TGGAGA-GAC | AG-AATGGTT  | 2185 |
| BovB_Cg-RTE-Christinus         | GCACAACCTA  | T-ACTCT--G | GACAAGAAGC  | TACTGTGA-G | GACAGAATA  | TGGAGA-AAC | AG-AATGGTT  | 1706 |
| BovB_Bh-RTE-Bothriocroton_hydr | AGGAATCCCT  | TAGAAG--A  | ATGGAGTAGC  | CTTCATAGT  | AACAAGAGAG | TGAAAACAG  | AGTACTGGCG  | 739  |
| BovB_MI-RTE-Gehyra_variegata   | -----CATT   | TTACATC--  | -CAGCAAGT   | TATACTTG-A | AATTTTACTT | CAGCAA---- | TATGTGAATT  | 797  |
| Sly-rnd1_family284-LINE/RTEBov | -----       | -----      | -----       | -----      | -----      | -----      | -----       | -    |
| Sly-rnd5_family2019-LINE/RTEBo | TTGTTTCGCTT | GTG-CTTC-G | GTTATCGCAT  | TATT-TTGT  | GTTGTTACTG | TTCCTT--AA | TTAGTTG-CT  | 275  |
| Sly-rnd3_family322-LINE/RTEBov | TTGTAT-CTT  | GTA-GTTT-G | ATTATTGTAT  | TATT-TCGTA | GT-ATTGTTA | TGCTAT--TA | TTGCTA-TA   | 404  |
| Sly-rnd5_family1698-LINE/RTEBo | ATGTTT---   | -TG-ATG-T  | GTTATTGTTT  | CTTTCTCGTA | GACTTTAC   | TGCTTT--TC | TTATTAAC    | 91   |
| Sly-rnd1_family795-LINE/RTEBov | GAGATTCCTT  | ACATATTG-T | GTTCTTGT    | ATTTTCTACA | GA-TTCTTG  | TGTAGT--AG | TCAATTTGATG | 330  |
| Stu-rnd-5_family-3162_LINE_RTE | GAGGAGGAGA  | AGC--GGAC  | GNNTAAGGAA  | GTCTATAAGA | CGGCGAAGC  | GGAGCGAAG  | TT-AGCGGTT  | 2004 |
| Sly-rnd6_family1960-LINE/RTEBo | GAGGAAGCGA  | AGC--GGAC  | GNNTAAGGAA  | GTCTATATGG | TGGCGAAA   | -GAGCGAAG  | TT-AGCGGTT  | 1191 |
| Stu-rnd-5_family-2493_LINE_RTE | ATGGAGTGGC  | TGACTGGGTT | GTTTAAATGTC | ATTTTAAAGA | CGGCGAAAAT | --GCCGGAAG | ---AATGG--  | 133  |
| Sly-rnd5_family447-LINE/RTEBov | ATGGAGTGGT  | TGACTGGGTT | GTTTAAATGTC | ATTTTAAAGA | CGGCGAAAAT | --GCCGGAAG | ---AATGG--  | 312  |
| Stu-rnd-6_family-2093_LINE_RTE | -----       | -----      | -----       | -----      | -----      | -----      | -----       | -    |
| Consensus                      | AGNAA--CCTG | T-ATGTG--G | GTCAAGAAGC  | AACAGTTA-G | AACCGAACA  | TGGAAC-AAC | TG-ATTGGTT  |      |

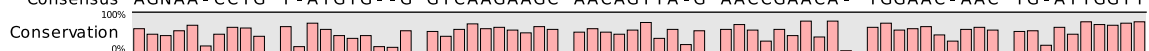

|                                | 3,240           | 3,260          | 3,280          |                 |                |                |               |      |
|--------------------------------|-----------------|----------------|----------------|-----------------|----------------|----------------|---------------|------|
| Stu-rnd-1_family-417_LINE_RTE  | AGACAGGACA      | TGACGCANCT     | TCA - - - -GCT | TACCGAGGAC      | ATGACCCTAG     | ATAGGAAGGT     | GTGGAGGTCG    | 219  |
| Sly-rnd1_family377-LINE/RTEBov | AGACANGACA      | TGACGCANCT     | TCA - - - -GCT | TACCGAGGAC      | ATGACCCTAG     | ATAGGAGGGT     | GTGGAGGTCG    | 90   |
| Stu-rnd-1_family-489_LINE_RTE  | AGACAGGACA      | TGACGCANCT     | TCA - - - -GCT | TACCGAGGAC      | ATGAC - - - -  | - - - - -      | - - - - -     | 87   |
| Stu-rnd-1_family-607_LINE_RTE  | GCGGATGACA      | TAGTACTGAT     | TGACGAGACG     | CGCGACGGAG      | TAAACGCTAG     | GTTGGAGGTT     | TGGAGACAAA    | 517  |
| Stu-rnd-1_family-645_LINE_RTE  | GCGGATGACA      | TAGTACTGAT     | TGACGAGACG     | CGCGACGGAG      | TAAACGCTAG     | GTTGGAGGTT     | TGGAGACAAA    | 289  |
| Sly-rnd4_family81-LINE/RTEBovB | GCGAATGACA      | TAGT TCTGAT    | TGACGAGACT     | CGCGACGGAG      | TAAACGCTAG     | GTCGGAGGTT     | TGGAGACAAA    | 364  |
| Stu-rnd-6_family-408_LINE_RTE  | CGACATNATA      | TTANGTTAAT     | TGACGAAACT     | AGCGAGGGAG      | TGCACCAAAA     | GCTCGAACTA     | TGGAGAANCA    | 213  |
| Stu-rnd-1_family-351_LINE_RTE  | TGAGATGGTT      | CGGACATG - -   | TGAAGAGGAG     | ATGCGC - -GG    | ACGCCCCAGT     | GAGGAGGTGC     | GAGAGGTTGG    | 538  |
| Stu-rnd-1_family-382_LINE_RTE  | TGAGATGGTT      | CGGACATG - -   | TGAAGAGGAG     | ATGCGC - -GG    | ACGCCCCAGT     | GAGGAGGTGC     | GAGAGGTTGG    | 274  |
| Sly-rnd6_family746-LINE/RTEBov | TGAGATGGTT      | CGGACATG - -   | TGAAGAGGAG     | ATGCGC - -AG    | ATGCCCCAGT     | GAGGAGGTGT     | GAGAGGTTGG    | 89   |
| Stu-rnd-5_family-325_LINE_RTE  | TGAGATGGTT      | TGGTCATG - -   | TCCTGCGTCC     | ACCTCC - -AG    | ATGCACCGT      | CCGTAGGTGT     | GA AACCATGG   | 157  |
| Sly-rnd4_family509-LINE/RTEBov | TGAGATGGTT      | TGGTCATG - -   | TCCTGCGTCC     | ACCTCC - -AG    | ATGCACCGGT     | CCGTAGGTGT     | GA AACCATGG   | 351  |
| Stu-rnd-1_family-513_LINE_RTE  | - - AAATGGAA    | TAGTGAGGAT     | TCATATAGCC     | GACCCC - -AA    | CTTGTTTGGG     | ATTGAGGCGT     | AGTTG - TTGT  | 65   |
| Sly-rnd5_family1442-LINE/RTEBo | CGGAATGGA -     | TACAGAGGAT     | TCATATAGCC     | GACCCC - -AA    | CTAATTTGGG     | ATTGAGGTGT     | AGTTGATTGA    | 110  |
| BovB_GI-RTE-Gehyra_lazelli     | TAGCATAG - G    | AAAAGGAGTA     | CGACAAGGAT     | GTATAT - -T     | GTACCCCTGC     | TTATTTAATT     | TATATGCAGA    | 2502 |
| BovB_Gv-RTE-Gehyra_variegata   | TAGCATAG - G    | AAAAGGAGTA     | CGACAAGGAT     | GTATAT - -T     | GTACCCCTGC     | TTATTTAATT     | TATATGCAGA    | 2431 |
| BovB_PMo-RTE-Python_molurus    | CAAAATAG - G    | GAAAGGAGTA     | CGACAAGGCT     | GTATAC - -T     | GTACCCCTGC     | TTATTTAACC     | TATATGCAGA    | 2363 |
| BovB_Oa-RTE-Ovis_aries         | CAAAATAG - G    | GAAAGGAGTA     | CGACAAGGCT     | GTATAT - -T     | GTACCCCTGC     | TTATTTAACC     | TATATGCAGA    | 2389 |
| BovB-RTE-Bos_taurus            | CCAAATAG - G    | AAAAGGAGTA     | CGTCAAGGCT     | GTATAT - -T     | GTACCCCTGC     | TTATTTAACC     | TATATGCAGA    | 2987 |
| BovB_Me-RTE-Macropus_eugenii   | TAAACAT - - - - | - - - - -      | - - - - -      | - - - - -       | - - - - -      | - TATTTAACC    | TATATGCCGA    | 1976 |
| BovB_Ano-RTE-Amphibolurus_norr | CAAAATTTG - G   | GAAAGGAGTA     | CGACAAGGCT     | GTATAT - -T     | GTCCCCCAGC     | TTATTTAACC     | TATATGCAGA    | 2436 |
| BovB_Gd-RTE-Eremiascincus_doug | TCAAATTTG - G   | GAAAGGAGTA     | CGACAAGGCT     | GTATAC - -T     | GTACCCCTGC     | TTATTTAACC     | TATATGCAGA    | 2024 |
| BovB_Er-RTE-Eremiascincus_rich | TCAAATTTG - G   | GAAAGGAGTA     | CGACAAGGCT     | GTATAC - -T     | GTACCCCTGC     | TTATTTAACC     | TATATGCAGA    | 2559 |
| BovB_Ca-RTE-Ctenotus_atlas     | TCAAATTTG - G   | GAAAGGAGTA     | CGACAAGGCT     | GTATAC - -T     | GTACCCCTGC     | TTATTTAACC     | TATATGCAGA    | 2552 |
| BovB_Es-RTE-Egernia_stokesii   | TAAAATTTG - G   | GAAAGGAGTA     | TGACAAGGCT     | GTATAT - -T     | GTACCCCTGC     | TTATTTAACC     | TATATGCAGA    | 2387 |
| BovB_Tr-RTE-Tiliqua_rugosa     | TAAAATTTG - G   | GAAAGGAGTA     | CAACAAGACT     | GCAAAAT - -T    | GTACCCCTGC     | TTATTTAACC     | TATATGCAGA    | 2395 |
| BovB_ALI-RTE-Amblyomma_limbata | CGAAATTTG - C   | GAAAGAAGTT     | CGGCAAGGCT     | GTATAC - -T     | GTGCCCCCTC     | CTATTTAATT     | TATATGCAGA    | 2566 |
| BovB_Hs-RTE-Hydrophis_spiralis | CAAAATTTG - G   | GAAAGGAGTT     | TGGCAAGGCT     | GAATAC - -T     | GTGCCCCCTC     | CTATTTAACC     | TATATGCAGA    | 768  |
| BovB_VA-RTE-Vipera_ammodytes   | CAAAATTTG - G   | GAAAGGAGTC     | CGGCAAGGCT     | GTATAC - -T     | GTTGCCCTGC     | CTATTTAACC     | TATATGCAGA    | 2357 |
| BovB_ACo-RTE-Agkistrodon_conto | CAAAATTTG - G   | GAAAGGAGTC     | CGGCAAGGCT     | GTATTC - -T     | GTGCCCCCTC     | CTATTTAACC     | TATATGCAGA    | 2357 |
| BovB_Pg-RTE-Perameles_gunnii   | TAAAGATTG - G   | AAAAGGAATA     | TGCCAAGGCT     | ATATAT - -G     | GTCTCTTAT      | TTATTTAATT     | TATATGCAAA    | 520  |
| BovB_lo-RTE-Isodon_obesulus    | AAAGATTGTA      | AAAAGGAGTA     | TGACAAGGCT     | GCATAT - -T     | ATCACCATTAT    | TTATTTAACC     | TATATGCAGA    | 957  |
| BovB_Bp-RTE-Burramys_parvulus  | TAAAGATTG - G   | AAAAGGAGTA     | TGACAAGGCT     | GTATAT - -T     | GTACCCCTAT     | TTATTTAACC     | TATATGCAGA    | 1057 |
| BovB_Pb-RTE-Petaurus_breviceps | TAAAGATTG - G   | AAAAGGAGTA     | CGACAAGGCT     | GTATAT - -T     | GTACCCCTAT     | TTATTTAACC     | TATATGCAGA    | 1124 |
| BovB_Ma-RTE-Macropus_antilopin | TAAAGATTG - G   | AAAAGGAGTA     | TGACAAGGCT     | GTATAT - -T     | GTACCCCTAT     | TTATTTAACC     | TATATGCAGA    | 2471 |
| BovB_Af-RTE-Antechinus_flavipe | TCTGATTGGA      | AAAAGATTA      | TGATCATATT     | GTATGC - -T     | TCTCTTTAT      | TTAGTTAATT     | TATATGTAGA    | 1676 |
| BovB_Ac-RTE-Anolis_carolinensi | CAAGATTG - G    | GAAAGGAGTA     | CGGCAAGGCT     | CCATACCTA       | TTCACCCTAC     | CTATTTAACC     | TATATGCAGA    | 2335 |
| BovB_BM-RTE-Bombyx_mori        | TAAAT - TCAG    | AAGAGGAGTT     | CGCCAGGGGT     | GTATTC - -T     | GTACCCCTAT     | CTATTTAACC     | TATACGGCGA    | 2203 |
| BovB_Dr-RTE-Christinus         | TGGGA - TTGA    | GAAAGGTGTT     | TGACAAGGAT     | GCATTT - -T     | ATGCCCCTACC    | CTGTTCAATC     | TGTATGCTGA    | 2223 |
| BovB_La-RTE-Loxodonta_africana | TAAAG - TCAG    | GAAAGGTGTE     | CATCAGGGTT     | GTATCC - -T     | TTCACCATAC     | CTATCCAATC     | TGTATGCTGA    | 2350 |
| BovB_Pc-RTE-Procavia_capensis  | TAAAG - TCAG    | GAAAGGTGTE     | TGTCAGGGTT     | GTATCC - -T     | TTCACCATAC     | CTTTTTAATC     | TGTATGCCAA    | 2352 |
| BovB_Et-RTE-Christinus         | TAAAA - TCAG    | AAAAGGTGGG     | CGGCAAGGTT     | GTATCC - -T     | ATCACCACAT     | TTATTTAATA     | AATAGGCAGA    | 2126 |
| BovB_Ta-RTE-Tachyglossus_acule | TCCCA - TTAG    | TAAAGGTGTA     | AGACAAGGAT     | GTATCT - -T     | ATGCCCCTAT     | CTGTTTCATC     | TTTACACCGA    | 2492 |
| BovB_Plat-RTE-Ornithorhynchus  | TCCCA - TTAG    | TAAAGGTGTA     | AGACAAGGAT     | GTATCT - -T     | ATGCCCCTAT     | CTGTTTCATC     | TTTACACCGA    | 2481 |
| BovB_Ec-RTE-Equus_caballus     | TCCTA - TAGG    | CAAAGGTGTC     | AGACAAGGTT     | GCATTT - -T     | ATCTCCCTAT     | CTGTTTAAATC    | TGTATGCAGA    | 2251 |
| BovB_Cg-RTE-Christinus         | TTCCAATTTGG     | CAAAGGTGTC     | AGACAAGGAT     | GTATTT - -T     | ATCTCCCTAT     | CTGTTTAAATC    | TATATGCAGA    | 1773 |
| BovB_Bh-RTE-Bothriocroton_hydr | TATAACCTCA      | AAAAATGGCA     | -GATTGATTT     | CAATACAGG       | CCAAGGCAAA     | CCCTTCAACG     | GCCAC - - - A | 804  |
| BovB_MI-RTE-Gehyra_variegata   | CAGATTTACC      | AAAA - - - - - | -GATAGGACT     | GTTTTTCAA       | GTAGGCAGA -    | -NAACAAGA      | GACCAAAATTA   | 858  |
| Sly-rnd1_family284-LINE/RTEBov | - - - - -       | - - - - -      | - - - - -      | - - - - -       | - - - - -      | - - - - -      | - - - - -     | -    |
| Sly-rnd5_family2019-LINE/RTEBo | GTGTTTTCTT      | - - - TACGTTG  | TNTTCCGTT      | T - - CGT - -AG | CTGNITTCGAT    | TTGTTTTACT     | CGAGCCGAGG    | 338  |
| Sly-rnd3_family322-LINE/RTEBov | TGTTGCTTCA      | - - - TNTACTT  | CTATTACTTT     | T - - CTT - -NC | ATGATTTGTT     | TCGTT - - - CT | TGAGCCGAGG    | 464  |
| Sly-rnd5_family1698-LINE/RTEBo | CTATGCTTTC      | - - - TTCATTG  | TTTTT - - - T  | T - - CTT - -CT | TTTACTTGAT     | TTGATGCAT      | TGAGCCGAGG    | 150  |
| Sly-rnd1_family795-LINE/RTEBov | TCATGCCTCC      | GGATGAACAA     | AGACTACGTT     | TACCTT - -CT    | CCTGATCGAC     | TTAGCA - ACC   | TNCCATTCA     | 397  |
| Stu-rnd-5_family-3162_LINE_RTE | ACGACGGCNA      | AGACGGCAGC     | TTTTCAACGC     | TTGTATGTCG      | AGCTGGANNN     | NNNNNNNNNN     | NNNNNNNNNN    | 2074 |
| Sly-rnd6_family1960-LINE/RTEBo | ACGACGGCNA      | AAACGACAGC     | TTTTGAGCGC     | TTGTACGAGG      | AGCTAGGGAG     | CAAAGGCCGG     | GATANGAAGT    | 1261 |
| Stu-rnd-5_family-2493_LINE_RTE | AGGTGGAGTA      | CAATGA - - - - | TTCCG - - - -  | TTGTACAAGA      | AC - - - AAGGG | TGACATCAA      | AATTGCAACA    | 191  |
| Sly-rnd5_family447-LINE/RTEBov | AGGTGGAGTA      | CAATGA - - - - | TTCCG - - - -  | TTGTACAAGA      | AC - - - AAGGG | TGATATTCC      | AATTGCAACA    | 370  |
| Stu-rnd-6_family-2093_LINE_RTE | - - - - -       | - - - - -      | - - - - -      | - - - - -       | - - - - -      | GTGAGCTTGC     | TCACATTGCC    | 30   |
| Consensus                      | TAAAATTTG - G   | GAAAGGAGTA     | TGACAAGGCT     | GTATAC - - - T  | GTACCCCTAC     | TTATTTAACC     | TATATGCAGA    |      |

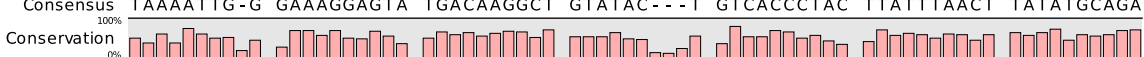



|                                | 3,300      | 3,320      | 3,340      | 3,360      |            |            |            |      |
|--------------------------------|------------|------------|------------|------------|------------|------------|------------|------|
| Stu-rnd-1_family-417_LINE_RTE  | CGNATTAGGG | TAGAAGGTTA | GTAGGTAGTC | GAGTGTGTG  | TTTCCTTGG  | AGGGTATGGG | TTGTTAGCGT | 289  |
| Sly-rnd1_family377-LINE/RTEBov | CGGATTAGGG | TAGAAGGTTA | GTAGGTAGTC | GAGTGTGTG  | TTGTT----- | -----      | -----      | 135  |
| Stu-rnd-1_family-489_LINE_RTE  | -----      | -----      | -----      | -----      | -----      | -----      | -----      | 87   |
| Stu-rnd-1_family-607_LINE_RTE  | CCCTGGAGTC | TAAAGGGTTC | AGGTTGAGCA | GGACCAAGAC | AGAATAATTG | GAGTGCAAGT | TCAGTGACGC | 587  |
| Stu-rnd-1_family-645_LINE_RTE  | CCCTGGAGTC | TAAAGGGTTC | AGGTTGAGCA | GGACCAAGAC | GAATAATTG  | GAGTGCAAGT | TCAGTGACGC | 359  |
| Sly-rnd4_family81-LINE/RTEBovB | CTCTGGAGTC | TAAAGGGTTC | AGGTTGAGCA | GGACCAAGAC | AAAGTACTTG | GAGTGTAAT  | TCAGTGACGC | 434  |
| Stu-rnd-6_family-408_LINE_RTE  | CTCTAGAGAG | TAAAGGGTTT | AGGATAAGTA | GAAGTAAGAC | CGAATACATG | CATTGCGAGT | TTAGTCA-GC | 282  |
| Stu-rnd-1_family-351_LINE_RTE  | CTATAGTGGG | TNCGAGGAGA | GGTAGAGGTA | GGCCGAAGAA | GTATTGGGGA | GAGGTGATTA | --GACAGGAC | 606  |
| Stu-rnd-1_family-382_LINE_RTE  | CTATAGTGGG | TNCGAGGAGA | GGTAGAGGTA | GGCCGAAGAA | GTATTGGGGA | GAGGTGATTA | --GACAGGAC | 342  |
| Sly-rnd6_family746-LINE/RTEBov | CTATAGCGGG | TNTNAGGAGA | GGTAGAGGTA | GAC-----   | -----      | -----      | -----      | 122  |
| Stu-rnd-5_family-325_LINE_RTE  | TGAGTGAAGG | TGTTAAAAGG | G-ACGAGGTA | GACCTAAAAT | CACATGGAAG | GAAGTTGTCT | --CGAAAGAC | 224  |
| Sly-rnd4_family509-LINE/RTEBov | TGAGTGAAGG | TGTTAAAAGG | GGACGAGGTA | GACCTAAAAT | CACATGGAAG | GAGGTGTCT  | --CGAAAGAC | 419  |
| Stu-rnd-1_family-513_LINE_RTE  | -----      | -----      | -----      | -----      | -----      | -----      | -----      | 65   |
| Sly-rnd5_family1442-LINE/RTEBo | TTGATACCT- | -----      | -----      | -----      | -----      | -----      | -----      | 119  |
| BovB_GI-RTE-Gehyra_lazelli     | GTACATCATG | CGAAATGCCG | GCCTGGACGA | ATCACAAGCT | GGAATT-AAG | ATCGCTGGG- | --AAAAACAT | 2568 |
| BovB_Gv-RTE-Gehyra_variegata   | GTACATCATG | CGAAATGCCG | GCCTGGACGA | ATCACAAGCT | GGAATT-AAG | ATCGCTGGG- | --AAAAACAT | 2497 |
| BovB_PMo-RTE-Python_molurus    | GTACATCATG | AGAAATGCCA | GGCTGGAAGA | ATCACAAGCC | GGAATT-AAG | ATTGCAAGG- | --AGAATCAT | 2429 |
| BovB_Oa-RTE-Ovis_aries         | GTACATCATG | AGAAATGCTG | GGCTGGATGA | AGCACAAGCT | GGAATC-AAG | ATTGCCAGG- | --AGAAATAT | 2455 |
| BovB-RTE-Bos_taurus            | GTACATCATG | AGAAACGCTG | GGCTGGAAGA | AACACAAGCT | GGAATC-AAG | ATTGCCGGG- | --AGAAATAT | 3053 |
| BovB_Me-RTE-Macropus_eugenii   | GTATGTCTAG | TGAAATGCCA | GACTGAGTGA | ATCAAAGCC  | AAAATT-AAG | GTTGGTGGG- | --AGAAATAT | 2042 |
| BovB_Ano-RTE-Amphibolurus_norr | ATACATCATG | CGGAAGGCTG | GGCTGGATGA | ATCACAAGCC | GGAATT-AAG | ATTGCCGGA- | --AGAAATAT | 2502 |
| BovB_Gd-RTE-Eremiascincus_doug | GTACATCATG | AGAAAGGCTG | GGCTGGATGA | TTCAACAAGT | GGAATC-AAG | ATTGCTGGG- | --AGAAATAT | 2090 |
| BovB_Er-RTE-Eremiascincus_rich | GTACATCATG | AGAAAGGCTG | GGCTGGATGA | TTCAACAAGT | GGAATC-AAG | ATTGCTGGG- | --AGAAATAT | 2625 |
| BovB_Ca-RTE-Ctenotus_atlas     | GTACATCATG | AGAAAGGCTG | GGCTGGATGA | TTCAACAAGT | GGAATC-AAG | ATTGCTGGG- | --AGAAATAT | 2618 |
| BovB_Es-RTE-Egernia_stokesii   | GTACATCATG | CGAAAGGCTG | GGCTGGATGA | ATCACAAGCT | GGAGTT-AAG | ATCGCCAGG- | --AGAAATAT | 2453 |
| BovB_Tr-RTE-Tiliqua_rugosa     | GTACATCATG | CAAAAGGCTA | GGCTGGATGA | ATCACAAGCT | GGAATT-AAG | ATAGCCAGG- | --AGAAATAT | 2461 |
| BovB_ALi-RTE-Amblyomma_limbatu | ACACATCATG | AGAAAGGCGG | GGCTAGATGA | ATCACCTGTC | GGAATT-AAG | ATCGATGGG- | --AGAAATAT | 2632 |
| BovB_Hs-RTE-Hydrophis_spiralis | GCACATCATG | AGAAAGGCGG | GGCTAGATGA | ATCAAAGTT  | GGAATT-AAG | ATTGCCGGG- | --AGAAATAT | 834  |
| BovB_VA-RTE-Vipera_ammodytes   | GCACATCATG | AGAAAGGCGG | GGCTAGATGA | ATCAAAGTT  | GGAATT-AAG | ATTGCTGGA- | --AGAAATAT | 2423 |
| BovB_ACo-RTE-Agkistrodon_conto | GCACATCATG | AGAAAGGCGG | GGCTAGATGA | ATCAAAGTT  | GGAATT-AAG | ATTGCCGGG- | --AGAAATAT | 2423 |
| BovB_Pg-RTE-Perameles_gunnii   | A-ATATCATG | TGAAATACCA | GGCTGGACAA | ATCAAAGCT  | AGAAAT-AAG | GTTGCCAGG- | --AGAAAAAA | 585  |
| BovB_Io-RTE-Isodon_obesulus    | GTACATCATA | TGAAATATCA | GACTGGATGA | ATCAAAGCT  | GGAATTTAAG | GTTGACGGG- | --AGAAATAT | 1024 |
| BovB_Bp-RTE-Burramys_parvulus  | GTACATCATG | TGAAATGCCA | GGCTGGATGA | ATCAAAGCC  | AGAATT-AAG | GTTGCTAGT- | --ACAAATAA | 1123 |
| BovB_Pb-RTE-Petaurus_breviceps | GTACATCATG | TGAAATGCCA | GGCTGGATGA | ATCAAAGCC  | AGAATT-AAG | GTTGCCAGG- | --AGAAATAT | 1190 |
| BovB_Ma-RTE-Macropus_antilopin | GTACATCATG | TGAAATGCCA | GGCTGGATGA | ATCAAAGCT  | GGAATT-AAG | GTTGCCAGG- | --AGAAATAT | 2537 |
| BovB_Af-RTE-Antechinus_flavipe | ACAAGTTATG | AAAAATGACT | GACTGGATGA | AACAAAAAGC | TGAAATCAAG | TTTTTCAGG- | --AG-----  | 1737 |
| BovB_Ac-RTE-Anolis_carolinensi | ACACATCATG | CGCATGCGAG | GGCTTGACGA | ATCCAAGCC  | AGAGTT-AAA | ATTGCTGGA- | --AGAAACAT | 2401 |
| BovB_BM-RTE-Bombyx_mori        | ATACATCATG | CGCAAGACC- | -CTAGAAAA  | CTGG--GAT  | GGAGGC-ATA | ACTATAGGT  | --GACGAAGT | 2263 |
| BovB_Dr-RTE-Christinus         | AGTGGTCTAG | AGGCTATCCA | ATCTGGACGA | GTCACCAATC | GGAGTT-AAG | ATCGGCCGG- | --AGAAACAT | 2289 |
| BovB_La-RTE-Loxodonta_africana | GCAAATAATC | CGAGAAGCTG | GACTATATGA | AGAAGAACGG | GGCATC-AGG | ATTGGAGGA- | --AGACTCAT | 2416 |
| BovB_Pc-RTE-Procavia_capensis  | GCAAATAATC | CGAGAAGCTG | GATTATATGA | AGAAGAACGA | GGCATC-AGG | ATTGGAGGA- | --TGACTCAT | 2418 |
| BovB_Et-RTE-Christinus         | GCAAATCATC | AGAAAAGCTG | AATTACATAA | AGAAGAAGAT | GACATC-AGG | ATTGGAGGA- | --AGGCTTAT | 2192 |
| BovB-Ta-RTE-Tachyglossus_acule | ATACATAATG | AGAGAAGCCG | GATTGGATGA | AGACAAACGG | GGAGTA-AAG | ATTGGAGGA- | --AGGAATAT | 2558 |
| BovB_Plat-RTE-Ornithorhynchus  | ATACCTAATG | AGAGAAGCCG | GATTGGATGA | AGACGAACGG | GGAGTA-AAG | ATTGGAGGA- | --AGGAATAT | 2547 |
| BovB_Ec-RTE-Equus_caballus     | ACATATCATA | CAAAAATCTG | GGCTAGACTG | AGATGAAGGA | GGAGTG-AAA | ATTGGTGGG- | --AGAAATAT | 2317 |
| BovB_Cg-RTE-Christinus         | ACATATCATA | AGAAAAGCTG | GATTGATTT  | AGATGAAGGT | GGAGTG-AAA | ATTGGTGGG- | --AGGAAAAA | 1840 |
| BovB_Bh-RTE-Bothriocroton_hydr | GTAGTCCAAG | CCTACGCCCC | AACCAC-TAA | TGCTGAAGAC | GAAG---AA  | GTTGGCCGG- | -----T     | 859  |
| BovB_MI-RTE-Gehyra_variegata   | GTACATCATG | AAAAATGCCA | AGCT---GA  | ATCAAAGCT  | ATTATT-AAA | GTTGTTGGG- | --AGAAATAT | 920  |
| Sly-rnd1_family284-LINE/RTEBov | -----      | -----      | -----      | -----      | -----      | -----TACA  | CTCTACCCCT | 14   |
| Sly-rnd5_family2019-LINE/RTEBo | GTCTATCGGA | AACAGCCTCT | CTA---CCTC | CG--CGAGGT | AGGGGTAAGG | TCTGCGTACA | CTCTACCCCT | 403  |
| Sly-rnd3_family322-LINE/RTEBov | GTCTATCAGA | AACAACCTCT | CTA---CCTT | T---CAAGGT | AGGGGTAAGG | TCTGCGTACA | CNCTACCCCT | 528  |
| Sly-rnd5_family1698-LINE/RTEBo | ATCTTTCGAA | AATAATCTTT | CTA---ATTC | TACACGAGAT | AATGATAAAA | TTTGCCTACA | TTTTATCTTC | 217  |
| Sly-rnd1_family795-LINE/RTEBov | TTTAATCGAT | GACATTCTAA | GTAGGTTGTC | TTTTCGAGAT | GTTGTAAGAA | CTGATACACT | TTCGAAGGAC | 467  |
| Stu-rnd-5_family-3162_LINE_RTE | NNNNNNNNNN | NNNNNNNNNN | NNNNNNNNNN | NNNNNNNNNN | NNNNNNNNNN | NNNNNNNNNN | NNNNNNNNNN | 2144 |
| Sly-rnd6_family1960-LINE/RTEBo | TGTACAGGCT | AGCCAAGGCG | AGAGAGAGAC | GGCTCGNGAC | CTGGACCAAG | TGAAG----- | -----      | 1316 |
| Stu-rnd-5_family-2493_LINE_RTE | ACTATAGGGG | TATCAAGCTG | CTAA-----  | -----      | -----      | -----      | -----      | 215  |
| Sly-rnd5_family447-LINE/RTEBov | ACTATAGGGG | TATCAAGCTG | TTAAGTCACA | CTATGAAAGT | TTGGGAGAGG | GTGGTGGAGA | TGAGGGTGAG | 440  |
| Stu-rnd-6_family-2093_LINE_RTE | CCGGATAAAG | GAGGAGGGTT | CGGTTAGCTG | GACAGCCANC | GTAAAACTAG | TCAATTCATG | --ATGAATCC | 98   |
| Consensus                      | GTACATCATG | AGAAAGGCTG | GGCTGGATGA | ATCACAAGCT | GGAATT-AAG | ATTGCNNGG- | --AGAAATAT |      |

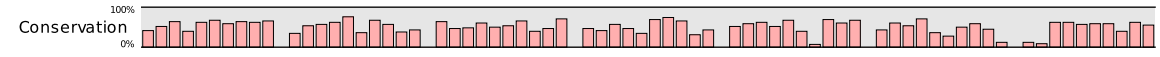

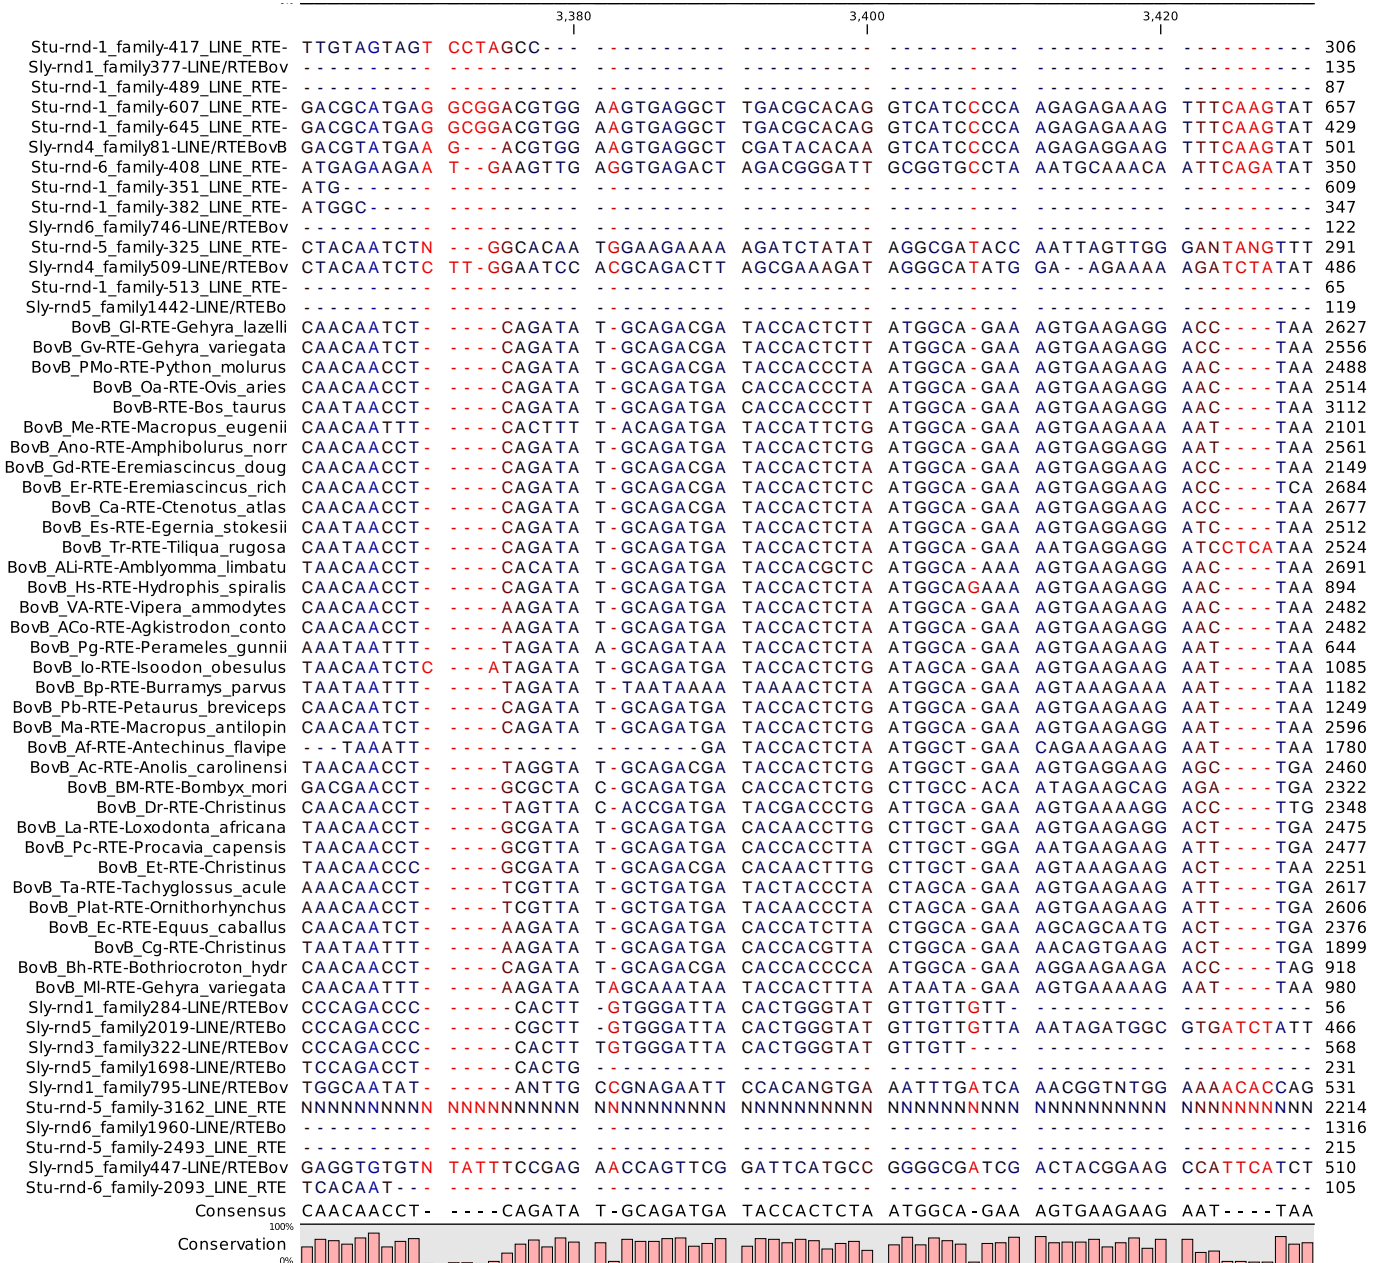

|                                | 3,440              | 3,460      | 3,480               | 3,500      |             |            |            |      |
|--------------------------------|--------------------|------------|---------------------|------------|-------------|------------|------------|------|
| Stu-rnd-1_family-417_LINE_RTE  | -----              | -----      | -----               | -----      | 306         |            |            |      |
| Sly-rnd1_family377-LINE/RTEBov | -----              | -----      | -----               | -----      | 135         |            |            |      |
| Stu-rnd-1_family-489_LINE_RTE  | -----              | -----      | -----               | -----      | 87          |            |            |      |
| Stu-rnd-1_family-607_LINE_RTE  | CTTGGG---T         | CTATAAT--- | -----               | -----      | 671         |            |            |      |
| Stu-rnd-1_family-645_LINE_RTE  | CTTGGG---T         | C-----     | -----               | -----      | 437         |            |            |      |
| Sly-rnd4_family81-LINE/RTEBovB | CTTGGG---T         | CTATGATCCA | AGGAAATGGG          | GAGATCGACG | ATGATGTAC   | ACATCGTATT | GGTGGGGGT  | 568  |
| Stu-rnd-6_family-408_LINE_RTE  | CTAGGC---T         | CGTTGTTTCA | AGAGAATGGA          | ATGATAGATG | AAGATG---   | -----      | -----      | 393  |
| Stu-rnd-1_family-351_LINE_RTE  | -----              | -----      | -----               | -----      | 609         |            |            |      |
| Stu-rnd-1_family-382_LINE_RTE  | -----              | -----      | -----               | -----      | 347         |            |            |      |
| Sly-rnd6_family746-LINE/RTEBov | -----              | -----      | -----               | -----      | 122         |            |            |      |
| Stu-rnd-5_family-325_LINE_RTE  | TAGTCATGTT         | AGTACGTTTA | CTTTAGGTC           | TATGCTTCT  | AGGAGTCTTT  | TAGTCCTGTC | AGAGATTTNT | 361  |
| Sly-rnd4_family509-LINE/RTEBov | AGGCGATACC         | TACTAGTTGG | GAATANGTT           | TAGTCATGTT | AGAGAACTTC  | TAATATTGTT | ----ACTGTT | 552  |
| Stu-rnd-1_family-513_LINE_RTE  | -----              | -----      | -----               | -----      | 65          |            |            |      |
| Sly-rnd5_family1442-LINE/RTEBo | -----              | -----      | -----               | -----      | 119         |            |            |      |
| BovB_GI-RTE-Gehyra_lazelli     | AGGGC----C         | TCCTGCTGAG | GGTGAAGG-A          | GGAGAGCGCA | AAAGTTGG-C  | TT-GAAACTC | AA-----    | 2682 |
| BovB_Gv-RTE-Gehyra_variegata   | AGAGC----C         | TCCTGCTGAG | GGTGAAGG-A          | GGAGAGCGCA | AAAGTTGG-C  | TT-GAAACTC | AA-----    | 2611 |
| BovB_PMo-RTE-Python_molurus    | AGAGC----C         | TCTTGATGAG | GGTGAAGG-A          | GGAGAGTGCA | AAAGCTGG-C  | TT-GAAACTC | AA-----    | 2543 |
| BovB_Oa-RTE-Ovis_aries         | AGAGC----C         | TCTTGATGAA | AGTGAAGG-A          | GGAGAGTGAA | AAAGCTGG-C  | TT-GAAACTC | AA-----    | 2569 |
| BovB-RTE-Bos_taurus            | AAAGC----C         | TCTTGATGAA | AGTGAAGG-T          | GGAGAGTGAA | AAAGTTGG-C  | TT-AAAGCTC | AA-----    | 3167 |
| BovB_Me-RTE-Macropus_eugenii   | GAAGC----C         | TCTTGA---- | AG-C                | GG-----    | AAAGCTGG-C  | TT-AAAGCTT | AA-----    | 2138 |
| BovB_Ano-RTE-Amphibolurus_norr | AGAAC----C         | TTGTAATGAG | GGTGAAGG-A          | GGAGAGTGCA | AAAAACGG-T  | CT-GAAACTC | AA-----    | 2616 |
| BovB_Gd-RTE-Eremiascincus_doug | AGAAC----C         | TTCTGATGAG | GGTGAAGG-A          | GGAAAGTGCC | AAAAATTGGC  | TT-GAAGCTC | AA-----    | 2205 |
| BovB_Er-RTE-Eremiascincus_rich | AGAAC----C         | TTCTGATGAG | GGTGAAGG-A          | GGAAAGTGCC | AAAAATTGG-C | TT-GAAGCTC | AA-----    | 2739 |
| BovB_Ca-RTE-Ctenotus_atlas     | AGAAC----C         | TTCTGATGAG | GGTGAAGG-A          | GGAAAGCGCC | AAAAATTGG-C | TT-GAAGCTC | AA-----    | 2732 |
| BovB_Es-RTE-Egernia_stokesii   | AGAAC----C         | TCTTGATGAG | GGTGAAGG-A          | GGAAAGTGCA | AAATGTGG-C  | TT-GAAACTT | AA-----    | 2567 |
| BovB_Tr-RTE-Tiliqua_rugosa     | AGAAC----C         | TCTTGATGAG | GGTGAAGG-A          | GGAAAGTGCA | AAATGTGG-C  | TT-GAAACTT | AA-----    | 2579 |
| BovB_ALI-RTE-Amblyomma_limbatu | AGAGC----C         | TCTTGATGCG | GGTGAAGGGA          | GGAGAGTGCA | GAAGTTGACC  | T-GAAACTC  | AA-----    | 2747 |
| BovB_Hs-RTE-Hydrophis_spiralis | AGAGC----C         | TCTTGATGAT | GGTGAAGA-A          | GGAGAGTGAA | AAAGTTGGCT  | TAAGAACTC  | AA-----    | 951  |
| BovB_VA-RTE-Vipera_ammodytes   | AGAGC----C         | TCTTGTGGC  | GGTGAAGA-A          | GGAGAGTGCA | AAACTTGGGT  | T-GAAACTT  | AA-----    | 2537 |
| BovB_ACo-RTE-Agkistrodon_conto | AGAGC----C         | TCTTGATGCG | GGTGAAGA-A          | GGAGAGTGCA | AAAGTTGGCT  | T-GAAACTC  | AA-----    | 2537 |
| BovB_Er-RTE-Perameles_gunnii   | GAAGT----C         | TCTTCATAAG | AGTTAAAG-A          | AGAGAATTTA | AAA--CATA   | AT-TAAACTT | AA--AAATT  | 703  |
| BovB_Io-RTE-Isodon_obesulus    | GAAGT----C         | TCTTGATGAN | GGTGAAGG-A          | GGAAGTGTA  | AAAGTTGTAC  | TT-AAAGTTT | AACATAAAAT | 1149 |
| BovB_Bp-RTE-Burramys_parvulus  | GAAGC----C         | TCTTGATGAA | AGTGAAGG-A          | GGAGAGTGTA | AAAGCTGGCT  | TG-AAGACTT | AA-----    | 1238 |
| BovB_Pb-RTE-Petaurus_breviceps | GAAGC----C         | TCTTGATGAG | GGTGAAGG-A          | GGAGAGTGTA | AAAGCTGGCT  | TG-AAG-CTT | AA-----    | 1304 |
| BovB_Ma-RTE-Macropus_antilopin | GAAGC----C         | TCTTGATGAG | GGTGAAGG-A          | GGAGAGTGTA | AAAGCTGGCT  | TG-AAG-CTT | AA-----    | 2651 |
| BovB_Af-RTE-Antechinus_flavipe | AAAAA <b>AAAC</b>  | TCCTGATGAG | TGTGACAG-A          | GGAGAGTATA | AAAA-TAAT   | TT-CAAGTTT | AA-----    | 1839 |
| BovB_Ac-RTE-Anolis_carolinensi | GGAGC----C         | CTATCACCAA | GGTGAAGG-A          | AGAAAGTGCA | AAAGCCGGC   | T-GCAGTTA  | AA-----    | 2515 |
| BovB_BM-RTE-Bombyx_mori        | CAGAG----C         | TTCTGAACAG | GATGAGC-A           | CATAGGGTTG | GAGATGGGAC  | TC-GCCCTC  | AA-----    | 2377 |
| BovB_Dr-RTE-Christinus         | AATAT----C         | TGGTCCGAAG | AGTAAAG-A           | AGAAAGTGAA | CACATGGGAC  | TG-TACCTC  | AA-----    | 2403 |
| BovB_La-RTE-Loxodonta_africana | AGCAC----T         | TACTGATGAA | GATCAAAG-A          | CCACAGCCTT | CAGTATGGAT  | TA-CACCTC  | AA-----    | 2530 |
| BovB_Pc-RTE-Procavia_capensis  | AACAC----T         | TACTGATGAA | GATCAAAG-A          | CCACAGCCTT | CAGTATGGAT  | TG-CACCTC  | AA-----    | 2532 |
| BovB_Et-RTE-Christinus         | AGAAC----T         | TGCTGATGAA | GATCAAAGG-A         | CTGCAGCCTT | CAGTCTGGAT  | TA-CAAATC  | AA-----    | 2306 |
| BovB-Ta-RTE-Tachyglossus_acule | AGGGC----T         | TATTATTTAA | AGTTAAGG-A          | ACAGAGCAAA | AAGATGGGCC  | TA-TATTTG  | AA-----    | 2672 |
| BovB_Plat-RTE-Ornithorhynchus  | AGGGC----T         | TATTATTTAA | AGTTAAGG-A          | ACAGAGCAAA | AAGATGGGCC  | TA-CATTTG  | AA-----    | 2661 |
| BovB_Ec-RTE-Equus_caballus     | AACAA----C         | TTCTGATGAA | AGTGAAGG-A          | AGAAAGTGCC | AAAGCAGGAC  | TG-CATTTG  | AA-----    | 2431 |
| BovB_Cg-RTE-Christinus         | AACAA----C         | TACTGATGAA | GGTAAAGG-C          | AGAAAGTGCC | AAAGCAGGAC  | TA-CATTTG  | AT-----    | 1954 |
| BovB_Bh-RTE-Bothriocroton_hydr | AGAAC----C         | TTATGATGAG | GGTGAAGG-A          | GGAAGGGCC  | AAAATTGGTT  | TG-AAGATC  | AA-----    | 973  |
| BovB_MI-RTE-Gehyra_variegata   | GAAGC----T         | TTTTAATAAG | AATCAAAT-A          | ACACAGTGTA | AAAATTGATT  | TA-AATTTT  | AATATAAAAC | 1043 |
| Sly-rnd1_family284-LINE/RTEBov | -----              | -----      | -----               | -----      | 56          |            |            |      |
| Sly-rnd5_family2019-LINE/RTEBo | GTGGC <b>ATCTA</b> | G-----     | -----               | -----      | 477         |            |            |      |
| Sly-rnd3_family322-LINE/RTEBov | -----              | -----      | -----               | -----      | 568         |            |            |      |
| Sly-rnd5_family1698-LINE/RTEBo | -----              | -----      | -----               | -----      | 231         |            |            |      |
| Sly-rnd1_family795-LINE/RTEBov | AGGACTT---         | -----      | -----               | -----      | 538         |            |            |      |
| Stu-rnd-5_family-3162_LINE_RTE | NNNNNNNNNN         | NNNNNNNNNN | NNNNNNNNNN          | NNNNNNNNNN | NNNNNNNNNN  | NGGCATCACA | ATATTAATGT | 2284 |
| Sly-rnd6_family1960-LINE/RTEBo | -----              | -----      | -----               | -----      | -----       | -----      | -----      | 1316 |
| Stu-rnd-5_family-2493_LINE_RTE | -----              | -----      | -----               | -----      | -----       | -----      | -----      | 215  |
| Sly-rnd5_family447-LINE/RTEBov | CGTAA <b>GGAGA</b> | CTGGTGGAGN | AGTATAG <b>GGGA</b> | GAGAAGAGGA | ACTTACACAT  | GGTG-----  | -----      | 564  |
| Stu-rnd-6_family-2093_LINE_RTE | -----              | -----      | -----               | -----      | -----       | -----      | -----      | 105  |
| Consensus                      | AGAGC----C         | TCTTGATGAG | GGTGAAGG-A          | GGA-AGTG-A | AAA--TGG-C  | T---AA-CT- | AA-----    |      |

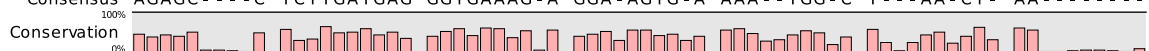

|                                | 3,520       |            | 3,540       |            | 3,560      |            |             |            |      |
|--------------------------------|-------------|------------|-------------|------------|------------|------------|-------------|------------|------|
| Stu-rnd-1_family-417_LINE_RTE  | -----       | -----      | -----       | -----      | -----      | 306        |             |            |      |
| Sly-rnd1_family377-LINE/RTEBov | -----       | -----      | -----       | -----      | -----      | 135        |             |            |      |
| Stu-rnd-1_family-489_LINE_RTE  | -----       | -----      | -----       | -----      | -----      | 87         |             |            |      |
| Stu-rnd-1_family-607_LINE_RTE  | -----       | -----      | -----       | -----      | -----      | 671        |             |            |      |
| Stu-rnd-1_family-645_LINE_RTE  | -----       | -----      | -----       | -----      | -----      | 437        |             |            |      |
| Sly-rnd4_family81-LINE/RTEBovB | GGATGAAATG  | GAGGCTCGCA | TCCGGCGTCT  | TGTGTGATAA | GAAGGTGCCG | CCGAAACTTA | AAGGTAAGTT  | 638        |      |
| Stu-rnd-6_family-408_LINE_RTE  | -----       | -----      | -----       | -----      | -----      | 393        |             |            |      |
| Stu-rnd-1_family-351_LINE_RTE  | -----       | -----      | -----       | -----      | -----      | 609        |             |            |      |
| Stu-rnd-1_family-382_LINE_RTE  | -----       | -----      | -----       | -----      | -----      | 347        |             |            |      |
| Sly-rnd6_family746-LINE/RTEBov | -----       | -----      | -----       | -----      | -----      | 122        |             |            |      |
| Stu-rnd-5_family-325_LINE_RTE  | ATGCCAGTAG  | AAAATATAGA | GAACCTCTAG  | TAC-TTTTTA | TTTTTATTTT | GTATAATATT | GGCCTGAGAT  | 430        |      |
| Sly-rnd4_family509-LINE/RTEBov | ATNTTTTTTAC | A---CGTGTT | GAACCTATTT  | TTCACITTTA | TTTTTATTTT | GTATAATATT | GGCNTGAGAT  | 619        |      |
| Stu-rnd-1_family-513_LINE_RTE  | -----       | -----      | -----       | -----      | -----      | 65         |             |            |      |
| Sly-rnd5_family1442-LINE/RTEBo | -----       | -----      | -----       | -----      | -----      | 119        |             |            |      |
| BovB_GI-RTE-Gehyra_lazelli     | CATCA-----  | -----AAAA  | AACATA----- | -----GA    | TCATGGCATC | CAGCCCCAT  | TACTCCTTGG  | 2728       |      |
| BovB_Gv-RTE-Gehyra_variegata   | CATCA-----  | -----AAAA  | AACATA----- | -----GA    | TCATGGCATC | CAGCCCCAT  | TACTCCTTGG  | 2657       |      |
| BovB_PMo-RTE-Python_molurus    | CATTA-----  | -----AAAA  | AACATA----- | -----GA    | TCATGGCATC | TGGACCCAT  | CAATTCCTGG  | 2589       |      |
| BovB_Oa-RTE-Ovis_aries         | CATTA-----  | -----AAAA  | AACATA----- | -----GA    | TCATGGCATC | TGGTCCCAT  | CACCTCATGG  | 2625       |      |
| BovB-RTE-Bos_taurus            | CATT-----   | -----CAGAA | AACGAA----- | -----GA    | TCATGGCATC | CGGTCCCAT  | CACCTCATGG  | 3213       |      |
| BovB_Me-RTE-Macropus_eugenii   | CATTA-----  | -----AAAA  | CCTTAA----- | -----AA    | TCACAACAAC | TGGTCCCAT  | CATTTCCTGG  | 2185       |      |
| BovB_Ano-RTE-Amphibolurus_norr | CATC-----   | -----AAAA  | AACATA----- | -----GA    | TCATGGCCAC | GGGTCCCAT  | CACCTCATGG  | 2662       |      |
| BovB_Gd-RTE-Eremiascincus_doug | CATTA-----  | -----AAAA  | AACATA----- | -----GA    | TCATGGCCAC | CACCTCCAT  | CACCTCCTGG  | 2252       |      |
| BovB_Er-RTE-Eremiascincus_rich | CATTA-----  | -----AAAA  | AACATA----- | -----GA    | TCATGGCAAC | CACCTCCAT  | CACCTCCTGG  | 2786       |      |
| BovB_Ca-RTE-Ctenotus_atlas     | CATTA-----  | -----AAAA  | A-CTAA----- | -----GA    | TCATGGCAAC | CACCTCCAT  | CACCTCCTGG  | 2778       |      |
| BovB_Es-RTE-Egernia_stokesii   | CATTA-----  | -----AAAA  | A-CTAA----- | -----GA    | TCATGGCATC | CGGTCCCAT  | CACCTCATGG  | 2613       |      |
| BovB_Tr-RTE-Tiliqua_rugosa     | CATTA-----  | -----AAAA  | AACATA----- | -----GA    | TCATGGCATC | CGGTCCCAT  | CACCTCATGG  | 2626       |      |
| BovB_ALi-RTE-Amblyomma_limbatu | CATTA-----  | -----AGAA  | AACATA----- | -----GA    | TCATGGCATC | CAGTCCCTC  | CACCTCCTGG  | 2793       |      |
| BovB_Hs-RTE-Hydrophis_spiralis | CATTA-----  | -----AGAA  | AACATA----- | -----GA    | TCATGGCATC | TGGCCCTCT  | CAATTCCTGG  | 997        |      |
| BovB_VA-RTE-Vipera_ammodytes   | CATTA-----  | -----AAAA  | AACCAA----- | -----GA    | TCATGGCATC | CAACCCCTC  | CAATTCCTGG  | 2583       |      |
| BovB_ACo-RTE-Agkistrodon_conto | CATTA-----  | -----AGAA  | AACCAA----- | -----GA    | TCATGGCATC | CGGCCTCTC  | CAATTCCTGG  | 2583       |      |
| BovB_Pg-RTE-Perameles_gunnii   | TAAAAAAACG  | TAAAATTA   | AACAAA----- | -----AA    | TCTTGGCAAC | TGGTCCCAT  | CACCTCCTGG  | 760        |      |
| BovB_lo-RTE-Isodon_obesulus    | TACAAAAACA  | -ACAATTACA | AATAAAACA   | TCCTAATA   | GA         | TCTTGGCAAC | TGGTCTAAT   | CACCTCCTAG | 1218 |
| BovB_Bp-RTE-Burramys_parvulus  | CAAAAAAA--  | -----AAC   | CACATA----- | -----GA    | TCTTGGCAAC | TGGTCTCAT  | CACCTCCTGG  | 1286       |      |
| BovB_Pb-RTE-Petaurus_breviceps | CATCAAAA--  | -----AAA   | -ACTAA----- | -----GA    | TCATGGCAAC | TGGTCCCAT  | CACCTCCTGG  | 1351       |      |
| BovB_Ma-RTE-Macropus_antilopin | CATAAAAA--  | -----AA    | AACATA----- | -----GA    | TCTTGGCAAC | TGGTCCCAT  | CACCTCCTGG  | 2698       |      |
| BovB_Af-RTE-Antechinus_flavipe | CATCAAAAC-  | -----AAA   | AACAAACTAA  | -----GA    | TCATAGCAAT | TGATCCCAT  | AATTTTCTGG  | 1892       |      |
| BovB_Ac-RTE-Anolis_carolinensi | CATCA-----  | -----AGAA  | AACCAA----- | -----GA    | CCATGGCAAC | CACACCCAC  | TGATAACTGG  | 2561       |      |
| BovB_BM-RTE-Bombyx_mori        | CAG-A-----  | -----TCCAA | AACATA----- | -----AA    | TCATGGTGT  | TGATCGCA   | CAAAAAAGTTG | 2423       |      |
| BovB_Dr-RTE-Christinus         | CATCA-----  | -----AAAA  | AACGAA----- | -----GG    | TAATGACAGT | AGCATGCAGT | GGTACAGTCC  | 2451       |      |
| BovB_La-RTE-Loxodonta_africana | CAT-A-----  | -----AAGAA | AACAAA----- | -----AA    | TCCTCACAAC | TGGACCAAT  | AGCAACATCA  | 2577       |      |
| BovB_Pc-RTE-Procavia_capensis  | CAT-C-----  | -----AAGAA | AACAAA----- | -----AA    | TCCTCACAAC | TGGACCAAT  | AGCAACATTTG | 2579       |      |
| BovB_Et-RTE-Christinus         | TGC-A-----  | -----AACAA | GACCAA----- | -----AA    | GCCTCACAAC | TGGACCAAT  | GGTAAACATCA | 2353       |      |
| BovB_Ta-RTE-Tachyglossus_acule | TGT-C-----  | -----AAGAA | AACAAA----- | -----GA    | TCATGACAAC | TGGAAATTTT | AACACATTTG  | 2719       |      |
| BovB_Plat-RTE-Ornithorhynchus  | TGT-C-----  | -----AAGAA | AACAAA----- | -----GA    | TCATGACAAC | TGGAAATTTT | AACACATTTG  | 2708       |      |
| BovB_Ec-RTE-Equus_caballus     | CAT-C-----  | -----AAGAA | GACAAA----- | -----AA    | TCATGACTAC | AGAAGAACTA | CACAACTTTA  | 2478       |      |
| BovB_Cg-RTE-Christinus         | CAT-C-----  | -----AAGAA | GACAAA----- | -----AG    | TCATGAATAC | AGAAAAATTA | CACAACTTAA  | 2001       |      |
| BovB_Bh-RTE-Bothriocroton_hydr | CATAA-----  | -----AAAA  | AACATA----- | -----GA    | TCATGGCAAC | CACCTCCAGT | CACCTCCTGG  | 1019       |      |
| BovB_MI-RTE-Gehyra_variegata   | AACAGCCCCC  | CAAAAAAAA  | AATTA-----  | -----GA    | TTATGTAAAC | TAATTTTAT  | CACCTTCTGA  | 1100       |      |
| Sly-rnd1_family284-LINE/RTEBov | -----       | -----      | -----       | -----      | -----      | -----      | 56          |            |      |
| Sly-rnd5_family2019-LINE/RTEBo | -----       | -----      | -----       | -----      | -----      | -----      | 477         |            |      |
| Sly-rnd3_family322-LINE/RTEBov | -----       | -----      | -----       | -----      | -----      | -----      | 568         |            |      |
| Sly-rnd5_family1698-LINE/RTEBo | -----       | -----      | -----       | -----      | -----      | -----      | 231         |            |      |
| Sly-rnd1_family795-LINE/RTEBov | -----       | -----      | -----       | -----      | -----      | -----      | 538         |            |      |
| Stu-rnd-5_family-3162_LINE_RTE | TGTGTATTGA  | GGTTGCGCCG | AGGAGGTTAT  | ACGGGCTATT | AGTAGGATGA | GCAGGGGAAG | AGCGACCGGA  | 2354       |      |
| Sly-rnd6_family1960-LINE/RTEBo | -----       | -----      | -----       | -----      | -----      | -----      | 1316        |            |      |
| Stu-rnd-5_family-2493_LINE_RTE | -----       | -----      | -----       | -----      | -----      | -----      | 215         |            |      |
| Sly-rnd5_family447-LINE/RTEBov | -----       | -----      | -----       | -----      | -----      | -----      | 564         |            |      |
| Stu-rnd-6_family-2093_LINE_RTE | -----       | -----      | -----       | -----      | -----      | -----      | 105         |            |      |
| Consensus                      | CAT-A-----  | -----AAAA  | AAC-AA----- | -----GA    | TCATGGCAAC | -GGTCC-AT- | CACCTCCTGG  |            |      |

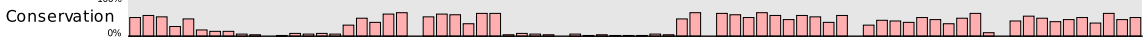



|                                 | 3,580                  | 3,600      | 3,620      | 3,640                            |                 |
|---------------------------------|------------------------|------------|------------|----------------------------------|-----------------|
| Stu-rnd-1_family-417_LINE_RTE   | -----                  | -----      | -----      | -----                            | 306             |
| Sly-rnd1_family377-LINE/RTEBov  | -----                  | -----      | -----      | -----                            | 135             |
| Stu-rnd-1_family-489_LINE_RTE   | -----                  | -----      | -----      | -----                            | 87              |
| Stu-rnd-1_family-607_LINE_RTE   | -----                  | -----      | -----      | -----                            | 671             |
| Stu-rnd-1_family-645_LINE_RTE   | -----                  | -----      | -----      | -----                            | 437             |
| Sly-rnd4_family81-LINE/RTEBovB  | CTATAGAGTG GTGGTTAGAC  | CGACTATGTT | GTATGGGGCG | GAGTGTGGC CAGTCAAGAA CTCNCACGTT  | 708             |
| Stu-rnd-6_family-408_LINE_RTE   | -----                  | -----      | -----      | -----                            | 393             |
| Stu-rnd-1_family-351_LINE_RTE   | -----                  | -----      | -----      | -----                            | 609             |
| Stu-rnd-1_family-382_LINE_RTE   | -----                  | -----      | -----      | -----                            | 347             |
| Sly-rnd6_family746-LINE/RTEBov  | -----                  | -----      | -----      | -----                            | 122             |
| Stu-rnd-5_family-325_LINE_RTE   | GAGCTTAAAT GGAGAA      | -----      | -----      | -----                            | 446             |
| Sly-rnd4_family509-LINE/RTEBov  | GAGCTTAAAT GGAGCGACAT  | GGTCAGTGAG | GATTCATATA | GCCGACCCCA ACTTGTTTGG GACTGAGGCG | 689             |
| Stu-rnd-1_family-513_LINE_RTE   | -----                  | -----      | -----      | -----                            | 65              |
| Sly-rnd5_family1442-LINE/RTEBo  | -----                  | -----      | -----      | -----                            | 119             |
| BovB_GI-RTE-Gehyra_lazelli      | C-AAAT-----TGATGGGGAG  | GTCATGGAAA | CCGTGACAGA | CTTCACGTT -CCTAGGATC             | CAA-AATCAC 2790 |
| BovB_Gv-RTE-Gehyra_variegata    | C-AAAT-----TGA CGGGGAG | GTCATGGAAA | CCGTGACAGA | CTTCACGTT -CCTAGGATC             | CAA-AATCAC 2719 |
| BovB_PMo-RTE-Python_molurus     | C-AAAT-----AGAAGGGGTA  | GAAATGGAAG | CAGTAACAGA | CTTCATTTA -TTTGGGCTC             | CAA-GATCAC 2651 |
| BovB_Oa-RTE-Ovis_aries          | C-AAAT-----AGATGGGGAA  | AAAAATGGA  | CAGTGACAGA | CTTTATTTT -CTTGGGCTC             | CAA-AATCAC 2687 |
| BovB-RTE-Bos_taurus             | G-AAAT-----AGATGGGGAA  | ACAGTGGAAA | CAGTGTGAGA | CTTTATTTT -TCTGGGCTC             | CAA-AATCAC 3275 |
| BovB_Me-RTE-Macropus_eugenii    | C-AAAT-----AGAAGGGAGAA | GAAATGGAAG | CAATGTGATA | TTTTGTATT -CTTGGGCTC             | AAA-GATCAG 2247 |
| BovB_Ano-RTE-Amphibolurus_norr  | G-AAAT-----AGAAGGGGAA  | GACATGGAGG | CAGTGACAGA | TTTTATTTT -CCTGGGCTC             | CAT-GATCAC 2724 |
| BovB_Gd-RTE-Eremiascincus_doug  | C-AAAT-----AGAAGGGGAA  | GAAATGGAAG | CAGTGACAGA | GTTTATTTT -CCTGGGCTC             | CAA-GATCAC 2314 |
| BovB_Er-RTE-Eremiascincus_rich  | C-AAAT-----AGAAGGGGAA  | GAAATGGAAG | CAGTGACAGA | GTTTATTTT -CCTGGGCTC             | CAA-GATCAC 2848 |
| BovB_Ca-RTE-Ctenotus_atlas      | C-AAAT-----AGAAGGGGAA  | GAAATGGAAG | CAGTGACAGA | CTTTATTTT -CCTGGGCTC             | CAA-GATCAC 2840 |
| BovB_Es-RTE-Egernia_stokesii    | C-AAAT-----AGAAGGGGAA  | GAAATGGAAG | CCGTGACAGA | GTTTATCTT -CTTGGGCTC             | CAA-GATCAC 2675 |
| BovB_Tr-RTE-Tiliqua_rugosa      | C-AAAT-----AGAAGGGGAA  | GAAATGGAAG | CTGTGACAGA | GTTTATCTT -CTTGGGCTC             | CAA-GATCAC 2688 |
| BovB_ALi-RTE-Amblyomma_limbatu  | C-AAAT-----AGATGGGGAA  | TAAATAGAGG | TAGTGACAGA | TTTTATTTTG TCTTTGGCTC            | CAA-GATCAT 2857 |
| BovB_Hs-RTE-Hydrophis_spiralis  | C-AAAT-----AGATGGGGAA  | GAAATAGAGG | TAGTGACAGA | TTTTATTTT -CCTGGGCTC             | CAA-GATCAC 1059 |
| BovB_VA-RTE-Vipera_ammodytes    | C-AAAT-----AGATGGGGAA  | GAAATGGAGG | TAGTGACAGA | TTTTATTTT -TCTGGGCTC             | CAA-GATCAC 2645 |
| BovB_ACo-RTE-Agkistrodon_conto  | C-AAAT-----AGATGGGGAA  | GAAATGGAGG | TAGTGACAGA | TTTTATCTT -CCTGGGCTC             | CAA-GATCAC 2645 |
| BovB_Pg-RTE-Perameles_gunnii    | A-AAAT-----TGAGAGAAA   | AACATGGAAA | CAGTGTGAGA | TTTTATA -T TCTTAGGCTC            | AAA-GATCAC 822  |
| BovB_lo-RTE-Isodon_obesulus     | GCAAA-----AGA AAGAGAA  | GAAATGGAAG | CAGTGTGAGA | TTTTATAAA TCTTAGACTC             | AAA-GATCAC 1283 |
| BovB_Bp-RTE-Burramys_parvulus   | C-AAAT-----AGAAGGGAGAA | GAAATGGAAG | CAGTGTGAGA | TTTTATA -T TCTTAGACTC            | AAA-AATCAA 1348 |
| BovB_Ac-RTE-Anolis_carolinensi  | C-AAAT-----AGAAGGGAGAA | GAAATGGAAG | CAGTGTGAGA | TTTTATA -T TCTTAGACTC            | AAA-GATCAC 1413 |
| BovB_Ma-RTE-Macropus_antilopin  | C-AAAT-----AGAAGGGAGAA | GAAATGGAAG | CAGTGTGAGA | TTTTATA -T TCTTAGACTC            | AAA-GATCAC 2760 |
| BovB_Af-RTE-Antechinus_flavipe  | C-AAAT-----AAAAGGAAA   | TAAATGTAAG | CAGTATGAGA | TTTTATA -T TCTTAGACTC            | AAA-GATCAC 1954 |
| BovB_Ac-RTE-Anolis_carolinensi  | C-AAAT-----AGAAGGGAGAA | AACGTGGAGG | CAGTGACAGA | CTTTATATT -CTAGGCATC             | AAA-GATCAC 2623 |
| BovB_BM-RTE-Bombyx_mori         | GAGCTTAGTG GAACACTAA   | -ACCTTGAGC | TTGTTGACAA | CTTTATTTA -CCTAGGCTC             | CAA-CATTA 2488  |
| BovB_Dr-RTE-Christinus          | ACATAACAAT TGACAATGAG  | GAAATCGAAT | CAGTCCAAGA | CTTCATCTT -ACTTGGATC             | CAA-GATCGA 2518 |
| BovB_La-RTE-Loxodonta_africana  | TGAT-----AAACGGAGAA    | AAGATTGAAG | TTGTCAAGGA | TTTCATTTT -ACTTGGAGC             | CAC-AATCAA 2638 |
| BovB_Pc-RTE-Procavia_capensis   | TCAT-----AAATGGAGAA    | AGGATTGAGG | TTGTCAAGGA | TTTCATTTT -ACTTGGGTC             | CAC-AATCAA 2640 |
| BovB_Et-RTE-Christinus          | CGAT-----AAATGGAGAA    | AAGGTTGAAA | TGGTCAAGAA | TTTTGCCTT -GCTTAGATC             | CAC-AATCAA 2414 |
| BovB-Ta-RTE-Tachyglossus_acule  | TAGT-----GGATGGAGAG    | AAGATTGAAA | TAGTTGACAA | TTTTTCTCT -CCTGGGATC             | GAT-AATCAA 2780 |
| BovB_Plat-RTE-Ornithorhynchus   | TAGT-----GGACGGAGAG    | AAGATTGAAA | TAGTTGACAA | TTTTTCTCT -CCTGGGATC             | GAT-AATCAA 2769 |
| BovB_Ec-RTE-Equus_caballus      | ACAT-----AGACAATGAA    | GACATTGAAA | TTGTTAAAGA | TTTTGTTTA -CCTTGGTTC             | AGT-CATCAA 2539 |
| BovB_Cg-RTE-Christinus          | ACAT-----AGATAAAGAA    | GAAATGGAAG | TTGTTCAAAA | TTTTCTATA -CCTAGGCTC             | CAC-TATCAA 2062 |
| BovB_Bh-RTE-Bothriocroton_hydr  | C-AAAT-----AGAATGGGAA  | GAAATGGAAG | CAGTGACATA | ATTTAACTT -CTTGGGCTC             | CAA-GATCAC 1081 |
| BovB_MI-RTE-Gehyra_variegata    | TAAATA-----GAAGTAGAAG  | AAGATAGGAG | AAATATAAAA | TTTTATATT -ATTAGGTTT             | AAACAATCAC 1164 |
| Sly-rnd1_family284-LINE/RTEBov  | -----                  | -----      | -----      | -----                            | 56              |
| Sly-rnd5_family2019-LINE/RTEBov | -----                  | -----      | -----      | -----                            | 477             |
| Sly-rnd3_family322-LINE/RTEBov  | -----                  | -----      | -----      | -----                            | 568             |
| Sly-rnd5_family1698-LINE/RTEBov | -----                  | -----      | -----      | -----                            | 231             |
| Sly-rnd1_family795-LINE/RTEBov  | -----                  | -----      | -----      | -----                            | 538             |
| Stu-rnd-5_family-3162_LINE_RTE  | CCCGACGAGA TCCCGGTGGA  | ATTTTGGAA  | AGCACGGACA | AGGCAGGNT GGAGTGGTTG ACTGGTTGT   | 2424            |
| Sly-rnd6_family1960-LINE/RTEBo  | -----                  | -----      | -----      | -----                            | 1316            |
| Stu-rnd-5_family-2493_LINE_RTE  | -----                  | -----      | -----      | -----                            | 215             |
| Sly-rnd5_family447-LINE/RTEBov  | -----                  | -----      | -----      | -----                            | 564             |
| Stu-rnd-6_family-2093_LINE_RTE  | -----                  | -----      | -----      | -----                            | 105             |
| Consensus                       | C-AAAT-----AGA-GG-GAA  | GAAATGGAAG | CAGTGACAGA | -TTTAT-T--C-TGGGCTC              | CAA-GATCAC      |

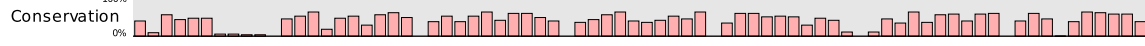



|                                | 3,720        | 3,740       | 3,760      | 3,780       |            |            |            |      |
|--------------------------------|--------------|-------------|------------|-------------|------------|------------|------------|------|
| Stu-rnd-1_family417_LINE_RTE   | -----        | -----       | -----      | -----       | 306        |            |            |      |
| Sly-rnd1_family377-LINE/RTEBov | -----        | -----       | -----      | -----       | 135        |            |            |      |
| Stu-rnd-1_family489_LINE_RTE   | -----        | -----       | -----      | -----       | 87         |            |            |      |
| Stu-rnd-1_family607_LINE_RTE   | -----        | -----       | -----      | -----       | 671        |            |            |      |
| Stu-rnd-1_family645_LINE_RTE   | -----        | -----       | -----      | -----       | 437        |            |            |      |
| Sly-rnd4_family81-LINE/RTEBovB | GG AACGAAGA  | TATT CGGGAC | AAGGTGGGAG | TGGCCTCCGT  | GGCGGACAAG | ATGAGGAAGC | GAGGTTGAGA | 848  |
| Stu-rnd-6_family408_LINE_RTE   | -----        | -----       | -----      | -----       | 393        |            |            |      |
| Stu-rnd-1_family351_LINE_RTE   | -----        | -----       | -----      | -----       | 609        |            |            |      |
| Stu-rnd-1_family382_LINE_RTE   | -----        | -----       | -----      | -----       | 347        |            |            |      |
| Sly-rnd6_family746-LINE/RTEBov | -----        | -----       | -----      | -----       | 122        |            |            |      |
| Stu-rnd-5_family325_LINE_RTE   | -----        | -----       | -----      | -----       | 446        |            |            |      |
| Sly-rnd4_family509-LINE/RTEBov | -----        | -----       | -----      | -----       | 743        |            |            |      |
| Stu-rnd-1_family513_LINE_RTE   | -----        | -----       | -----      | -----       | 65         |            |            |      |
| Sly-rnd5_family1442-LINE/RTEBo | -----        | -----       | -----      | -----       | 119        |            |            |      |
| BovB_GI-RTE-Gehyra_lazelli     | GGGAGGAAA    | GCGATGGCAA  | AACCTCAACA | GCATAATAAA  | -----AA    | GTAGGGACAT | C-ACCCTGCC | 2897 |
| BovB_Gv-RTE-Gehyra_variegata   | GGGAGGAAA    | GCGATGGCAA  | A-CCTCAACA | GCATAATAAA  | -----AA    | GTAGGGACAT | C-ACCCTGCC | 2824 |
| BovB_PMo-RTE-Python_molurus    | GGGAGGAAA    | GCTATGGCAA  | A-CCTAGACA | GCATATATAA  | -----AA    | GCAGAGACAT | C-ACCCTGCC | 2756 |
| BovB_Oa-RTE-Ovis_aries         | GGGAGGAAA    | GCTATGACCA  | A-CCTAGACA | GCATATATAA  | -----AA    | GCAGAGACAT | T-ACCTTGCC | 2792 |
| BovB-RTE-Bos_taurus            | GGGAGGAAA    | GTTATGACCA  | A-CCTAGATA | GCATATATAA  | -----AA    | GCAGAGACAT | T-ACCTTGCC | 3380 |
| BovB_Me-RTE-Macropus_eugenii   | GGGAGGAAAG   | --TATAGCAA  | A-TTTTGACA | GCGTACTAAA  | -----AA    | GCAGAGACAT | C-ACCCTGCC | 2350 |
| BovB_Ano-RTE-Amphibolurus_norr | GGGAGGAAA    | GCGATGGCAA  | A-TCTTGACA | GCATCTTAAA  | -----AA    | GCAGAGACAT | C-ACCCTGCC | 2829 |
| BovB_Gd-RTE-Eremiascincus_doug | GGGAGGAAA    | GCTATGGCGA  | A-TCTAGACA | ACTTAATGAA  | -----AA    | GCCGAGACAT | C-ACCCTGCC | 2419 |
| BovB_Er-RTE-Eremiascincus_rich | GGGAGGAAA    | GCTATGGCGA  | A-CCTAGACA | ACTTAATAAA  | -----AA    | GCCGAGACAT | C-ACCCTGCC | 2953 |
| BovB_Ca-RTE-Ctenotus_atlas     | GGGAGGAAA    | GCTATGGCGA  | A-CCTAGACA | ACTTAATAAA  | -----AA    | GCCGAGACAT | C-ACCCTGCC | 2945 |
| BovB_Es-RTE-Egernia_stokesii   | GGGAGGAAA    | GCTATGGTAA  | G-CCTAGACA | ACTTAATATA  | -----AA    | GCCGAGACAT | C-ACCCTGCC | 2780 |
| BovB_Tr-RTE-Tiliqua_rugosa     | GGGAGGAAA    | GCTATGGTAA  | G-CCTAGACA | ACTTAATGAA  | -----AA    | GCCGAGACAT | C-ACCCTGCC | 2793 |
| BovB_ALi-RTE-Amblyomma_limbatu | GCGGAGGAAA   | TCTATGGCAA  | A-TTAAATA  | GCATATAATA  | -----AA    | GCAGGGACAT | C-ACCCTGCC | 2962 |
| BovB_Hs-RTE-Hydrophis_spiralis | GGGAGGAAA    | GCTATGGCAA  | A-TCTAGACA | GCATATAATA  | -----AA    | GCAGAGACAT | C-ACCCTGCC | 1167 |
| BovB_VA-RTE-Vipera_ammodytes   | CAGGAGGAAA   | GCCATGGCAA  | A-TCTAGACA | GCACACTAAA  | -----AA    | GCAGAGACAT | C-ACCCTGCC | 2750 |
| BovB_ACo-RTE-Agkistrodon_conto | GGGAGGAAA    | GCTATGGCAA  | A-TCTAGACA | GCATATAATA  | -----AA    | GCAGAGACAT | C-ACCCTGCC | 2749 |
| BovB_Pg-RTE-Perameles_gunnii   | GGGAGGAAA    | ACTATGGCAA  | A-TCTGGACA | GCATATAATA  | -----AA    | GCAGAGACAT | C-ACCCTGCC | 929  |
| BovB_Io-RTE-Isodon_obesulus    | GGGAGGAAA    | GCAATGGCAA  | A-TCTGGACA | ACACACTAAA  | -----AA    | GCAGAAACAT | T-AACTTGCT | 1390 |
| BovB_Bp-RTE-Burramys_parvulus  | GGGAGGAAA    | ACTATGGCAA  | A-TCAGGACA | GCATATAATA  | -----AA    | GCAGAGACAT | C-ACCCTGCC | 1474 |
| BovB_Pb-RTE-Petaurus_breviceps | GGGAGGAAA    | GCTATGGCAA  | A-TCTAGACA | GCATATAATA  | -----AA    | GCAGAGATAT | A-ACCCTGCC | 1519 |
| BovB_Ma-RTE-Macropus_antilopin | GGGAGGAAA    | GCTATGGCAA  | A-TCTGGACA | GCATATAATA  | -----AA    | GCAGAGACAT | C-ACCCTGCC | 2865 |
| BovB_Af-RTE-Antechinus_flavipe | AAAAGAAAA    | GCTATGGCAA  | A-TATGAACA | GCATATAATA  | -----AA    | GCAGAAACAT | C-ATCTTTT  | 2059 |
| BovB_Ac-RTE-Anolis_carolinensi | GGGAGGAAA    | GCAATGGCCA  | A-CCTCGACA | AAATAGTGAA  | -----AA    | GCAAGACAT  | C-ACACTGGC | 2728 |
| BovB_BM-RTE-Bombyx_mori        | GA---AGTA    | -CAGCTC---  | ---GGTAA   | AA-TCTGGAA  | -----GG    | ACCATAACT  | T-ACCCAGAA | 2557 |
| BovB_Dr-RTE-Christinus         | GGCCGCAGTG   | -CAATGCAAG  | G-AATGGTGA | AGGTATGGAA  | -----AA    | GCAAGGCAT  | C-AGCATTGT | 2623 |
| BovB_La-RTE-Loxodonta_africana | GGCAAATCTG   | -CTGCAAAAG  | A-ACTCTTCA | AAGTGTGAA   | -----AA    | GCAAGACAT  | C-ACCCTGAA | 2743 |
| BovB_Pc-RTE-Procavia_capensis  | GGAAAACTCTG  | -CTGCAAAAG  | A-TCTCTTTA | AAGTATGAA   | -----AA    | GTAAGATGT  | C-ACCCTGAA | 2745 |
| BovB_Et-RTE-Christinus         | GGTAAATCCA   | -CCACACACG  | G-TCTCGTTA | GAGTACTGAA  | -----AA    | G---GATCT  | T-ACCTCGAG | 2514 |
| BovB-Ta-RTE-Tachyglossus_acule | GGGAGGAACTTG | -CTATGAAGA  | G-CCTGGAAA | AAGTCAATGAA | -----AT    | GTGCTGATGT | A-ACAATTGC | 2885 |
| BovB_Plat-RTE-Ornithorhynchus  | GGGAGGAACTTG | -CTATGAAGA  | G-CCTGGAAA | AAGTCAATGAA | -----AT    | GTGCTGATGT | A-ACAATTGC | 2874 |
| BovB_Ec-RTE-Equus_caballus     | AGAAGGGCAG   | -CAATGAAAAG | A-ATTAGGAA | AGATCATCAA  | -----GT    | GTAAGGAAAT | G-TCAATTGA | 2644 |
| BovB_Cg-RTE-Christinus         | GGGAGGGCAG   | GCAATGAAAA  | A-CCTAGAAA | AGATCTGAA   | -----GT    | GTAAGGATGT | G-TCCGCTCA | 2168 |
| BovB_Bh-RTE-Bothriocroton_hydr | GGGAGAAAA    | GCTATGGCGA  | A-CCTAGAAA | ACTTAATAAA  | CTTAATAAA  | GTGAGACAT  | C-ACCCTGCC | 1194 |
| BovB_MI-RTE-Gehyra_variegata   | GGGAGGAAA    | GCTATGGCAA  | A-TCTGGACA | ATATATAAAC  | -----AA    | GCAATGATAT | C-ATCATGCT | 1270 |
| Sly-rnd1_family284-LINE/RTEBov | -----        | -----       | -----      | -----       | 56         |            |            |      |
| Sly-rnd5_family2019-LINE/RTEBo | -----        | -----       | -----      | -----       | 477        |            |            |      |
| Sly-rnd3_family322-LINE/RTEBov | -----        | -----       | -----      | -----       | 568        |            |            |      |
| Sly-rnd5_family1698-LINE/RTEBo | -----        | -----       | -----      | -----       | 231        |            |            |      |
| Sly-rnd1_family795-LINE/RTEBov | -----        | -----       | -----      | -----       | 538        |            |            |      |
| Stu-rnd-5_family3162_LINE_RTE  | GAACAAGGGT   | GATATCCAAA  | ATTGCAACAA | CTATAGGGGT  | ATCAAGTTGT | TAA        | -----      | 2547 |
| Sly-rnd6_family1960-LINE/RTEBo | -----        | -----       | -----      | -----       | -----      | -----      | -----      | 1316 |
| Stu-rnd-5_family2493_LINE_RTE  | -----        | -----       | -----      | -----       | -----      | -----      | -----      | 215  |
| Sly-rnd5_family447-LINE/RTEBov | -----        | -----       | -----      | -----       | -----      | -----      | -----      | 564  |
| Stu-rnd-6_family2093_LINE_RTE  | -----        | -----       | -----      | -----       | -----      | -----      | -----      | 105  |
| Consensus                      | GG-AGGAAA-   | -CTATGGCAA  | A--CT-GACA | -C-TA-T-AA  | -----AA-   | GCA--GACAT | C-ACC-TG-- |      |

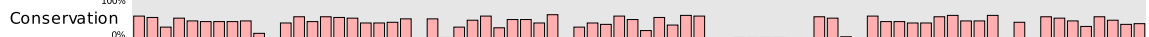

|                                | 3,800       |               |            | 3,820     |          |       | 3,840 |            |      |
|--------------------------------|-------------|---------------|------------|-----------|----------|-------|-------|------------|------|
| Stu-rnd-1_family417_LINE_RTE   | ---         | ---           | ---        | ---       | ---      | ---   | ---   | 306        |      |
| Sly-rnd1_family377-LINE/RTEBov | ---         | ---           | ---        | ---       | ---      | ---   | ---   | 135        |      |
| Stu-rnd-1_family489_LINE_RTE   | ---         | ---           | ---        | ---       | ---      | ---   | ---   | 87         |      |
| Stu-rnd-1_family607_LINE_RTE   | ---         | ---           | ---        | ---       | ---      | ---   | ---   | 671        |      |
| Stu-rnd-1_family645_LINE_RTE   | ---         | ---           | ---        | ---       | ---      | ---   | ---   | 437        |      |
| Sly-rnd4_family81-LINE/RTEBovB | TGGTTCGGAC  | TCC---        | ---        | ---       | ---      | ---   | ---   | 861        |      |
| Stu-rnd-6_family408_LINE_RTE   | ---         | ---           | ---        | ---       | ---      | ---   | ---   | 393        |      |
| Stu-rnd-1_family351_LINE_RTE   | ---         | ---           | ---        | ---       | ---      | ---   | ---   | 609        |      |
| Stu-rnd-1_family382_LINE_RTE   | ---         | ---           | ---        | ---       | ---      | ---   | ---   | 347        |      |
| Sly-rnd6_family746-LINE/RTEBov | ---         | ---           | ---        | ---       | ---      | ---   | ---   | 122        |      |
| Stu-rnd-5_family325_LINE_RTE   | ---         | ---           | ---        | ---       | ---      | ---   | ---   | 446        |      |
| Sly-rnd4_family509-LINE/RTEBov | ---         | ---           | ---        | ---       | ---      | ---   | ---   | 743        |      |
| Stu-rnd-1_family513_LINE_RTE   | ---         | ---           | ---        | ---       | ---      | ---   | ---   | 65         |      |
| Sly-rnd5_family1442-LINE/RTEBo | ---         | ---           | ---        | ---       | ---      | ---   | ---   | 119        |      |
| BovB_GI-RTE-Gehyra_lazelli     | --- AACAAAA | GT --- CCGT   | ATGGTCAAAG | CAATGGTC  | ---      | ---   | TTCC  | CAGTAGTGAT | 2942 |
| BovB_Gv-RTE-Gehyra_variegata   | --- AACAAAA | GT --- TCGT   | ATGGTCAAAG | CAATGGTC  | ---      | ---   | TTCC  | CAGTAGTGAT | 2869 |
| BovB_PMo-RTE-Python_molurus    | --- GACAAAG | AT --- CCGC   | ATAATCAAAG | CTATGGTT  | ---      | ---   | TTTC  | CAGTAGTAAT | 2801 |
| BovB_Oa-RTE-Ovis_aries         | --- AACAAAG | GT --- CCAT   | ATAGTCAAAG | CTATGGTT  | ---      | ---   | TTTC  | CAGTAGTCAT | 2837 |
| BovB-RTE-Bos_taurus            | --- AACAAAG | GT --- CCGT   | CTAGTCAAGG | CTATGGTT  | ---      | ---   | TTTC  | CTGTGGTCAT | 3425 |
| BovB_Me-RTE-Macropus_eugenii   | --- AACAAAT | GT --- ACAT   | ATAGTAAAAG | TGATGATC  | ---      | ---   | TTTC  | TAGTAGACAC | 2395 |
| BovB_Ano-RTE-Amphibolurus_norr | --- AACAAAA | GT --- CCGA   | ATAGTCAAAG | CTATGGTT  | ---      | ---   | TTTC  | CTGTAGTGAT | 2874 |
| BovB_Gd-RTE-Eremiascincus_doug | --- AACAAAG | GT --- TCGC   | ATAGTCAAAG | CGATGGTT  | ---      | ---   | TTCC  | CAGTAGCAAT | 2464 |
| BovB_Er-RTE-Eremiascincus_rich | --- AACAAAG | GT --- TCGC   | ATAGTCAAAG | CTATGGTT  | ---      | ---   | TTCC  | CAGTAGCAAT | 2998 |
| BovB_Ca-RTE-Ctenotus_atlas     | --- AACAAAG | GT --- TCGC   | ATAGTCAAAG | CTATGGTT  | ---      | ---   | TTCC  | CAGTAGCAAT | 2990 |
| BovB_Es-RTE-Egernia_stokesii   | --- AACAAAG | GT --- CCGT   | ATAGTCAAAG | CTATGGTT  | ---      | ---   | TTCC  | CAGTAGTAAT | 2825 |
| BovB_Tr-RTE-Tiliqua_rugosa     | --- AACAAAG | GT --- CCGT   | ATAGTCAAAG | CTATGGTT  | ---      | ---   | TTCC  | CAGTAGTAAT | 2838 |
| BovB_ALi-RTE-Amblyomma_limbatu | --- AAAAAAA | AT --- GCGT   | ATAGTAAAGG | ATATGGTT  | ---      | ---   | TTCC  | AAGTTACAAT | 3007 |
| BovB_Hs-RTE-Hydrophis_spiralis | --- AACAAAA | GT --- GTGT   | ATAGTCAAAG | CTATGGTT  | ---      | ---   | TTCC  | CAGTTGCAAT | 1212 |
| BovB_VA-RTE-Vipera_ammodytes   | --- AACAAAA | GT --- CCGT   | ATAGTCAAAG | CTATGGTC  | ---      | ---   | TTCC  | CAGTTGCAAT | 2795 |
| BovB_ACo-RTE-Agkistrodon_conto | --- AACAAAA | GT --- ACGT   | ATAGTCAAAG | CCATGGTT  | ---      | ---   | TTCC  | CAGTTGCAAT | 2794 |
| BovB_Pg-RTE-Perameles_gunnii   | --- AACAAAG | GT --- TCGT   | ATAGTCAAAG | CTATGGTT  | ---      | ---   | TTTC  | TAGTAGCAAT | 974  |
| BovB_lo-RTE-Isodon_obesulus    | --- GACAAAA | GT --- CTAT   | ATAGTAAAAA | TTATAGTT  | ---      | ---   | TTTT  | CAGTAGCAAT | 1435 |
| BovB_Bp-RTE-Burramys_parvulus  | --- GACAAAG | GT A --- CCAT | ATAGTCAAAG | CTATGGTTG | TTGTTTGT | TGTTT | TTTC  | CAGTAGCAAT | 1538 |
| BovB_Pb-RTE-Petaurus_breviceps | --- AACAAAG | T --- CCAT    | ATAATAAAAA | ACTATGGTT | ---      | ---   | TTTC  | CAGTAGCAAT | 1564 |
| BovB_Ma-RTE-Macropus_antilopin | --- AACAAAG | GT --- CCAT   | ATAGTCAAAG | CTATGGTT  | ---      | ---   | TTTC  | CAGTAGCAAT | 2910 |
| BovB_Af-RTE-Antechinus_flavipe | --- AACAAAA | GT --- CTAT   | ATAGTCAAAG | CAGTATTT  | ---      | ---   | TTTC  | TAATAATAAT | 2105 |
| BovB_Ac-RTE-Anolis_carolinensi | --- AACAAAG | GT --- CCGC   | ATAGTCAAAG | CAATGGTA  | ---      | ---   | TTCC  | CCATAATAAC | 2773 |
| BovB_BM-RTE-Bombyx_mori        | --- AACAAAG | A --- CAAAA   | CTGGTGCTCA | CTTTGGTC  | ---      | ---   | TTTT  | C-ATTTTTCT | 2602 |
| BovB_Dr-RTE-Christinus         | --- AACAAAG | A --- TCAGA   | ATAGTCAATG | CCATTGTT  | ---      | ---   | TTCC  | A-ATCTTTAT | 2668 |
| BovB_La-RTE-Loxodonta_africana | --- GACTAAA | GAAGGTGCAC    | CTGACCCAAG | CCATGGT   | ---      | ---   | TTTT  | A-ATCACATC | 2791 |
| BovB_Pc-RTE-Procavia_capensis  | --- GACTAAA | G --- TGCGC   | CTGACCCAAG | CCATGGTA  | ---      | ---   | TTTT  | A-ATCGCATC | 2790 |
| BovB_Et-RTE-Christinus         | --- AAATAAG | G --- TGCAC   | CTGACCCAAG | CCATGGCA  | ---      | ---   | TTTT  | A-ATTGCTTC | 2559 |
| BovB-Ta-RTE-Tachyglossus_acule | --- CACAAAA | A --- TACAA   | ATTGTCAATT | CTATGGTG  | ---      | ---   | TTTT  | A-GTGACAAT | 2930 |
| BovB_Plat-RTE-Ornithorhynchus  | --- CACAAAA | A --- TACAA   | ATTGTCAACT | CTATGGTG  | ---      | ---   | TTTT  | A-GTGACAAT | 2919 |
| BovB_Ec-RTE-Equus_caballus     | --- GACTAAG | G --- CCAAG   | ATTATCCACA | CCCTCGTA  | ---      | ---   | TTCC  | A-ATTACTAT | 2689 |
| BovB_Cg-RTE-Christinus         | TGCGACCAAG  | A --- TCAAG   | ATAATTCATG | CCATAGTA  | ---      | ---   | TTCC  | CCATTACTAT | 2217 |
| BovB_Bh-RTE-Bothriocroton_hydr | --- AACAAAG | GT --- TCGC   | ATAGTCAAAG | CTATGGTT  | ---      | ---   | TTTC  | AAGTAGCAAT | 1239 |
| BovB_MI-RTE-Gehyra_variegata   | --- GATAAAA | AT --- CTGT   | GAAATAAAAG | CTATGGTT  | ---      | ---   | TTTC  | TAGTAGTAAA | 1315 |
| Sly-rnd1_family284-LINE/RTEBov | ---         | ---           | ---        | ---       | ---      | ---   | ---   | 56         |      |
| Sly-rnd5_family2019-LINE/RTEBo | ---         | ---           | ---        | ---       | ---      | ---   | ---   | 477        |      |
| Sly-rnd3_family322-LINE/RTEBov | ---         | ---           | ---        | ---       | ---      | ---   | ---   | 568        |      |
| Sly-rnd5_family1698-LINE/RTEBo | ---         | ---           | ---        | ---       | ---      | ---   | ---   | 231        |      |
| Sly-rnd1_family795-LINE/RTEBov | ---         | ---           | ---        | ---       | ---      | ---   | ---   | 538        |      |
| Stu-rnd-5_family3162_LINE_RTE  | ---         | ---           | ---        | ---       | ---      | ---   | ---   | 2547       |      |
| Sly-rnd6_family1960-LINE/RTEBo | ---         | ---           | ---        | ---       | ---      | ---   | ---   | 1316       |      |
| Stu-rnd-5_family2493_LINE_RTE  | ---         | ---           | ---        | ---       | ---      | ---   | ---   | 215        |      |
| Sly-rnd5_family447-LINE/RTEBov | ---         | ---           | ---        | ---       | ---      | ---   | ---   | 564        |      |
| Stu-rnd-6_family2093_LINE_RTE  | ---         | ---           | ---        | ---       | ---      | ---   | ---   | 105        |      |
| Consensus                      | --- AACAAA  | -G-----C--    | ATAGTCAA-G | -C-ATGGT- | -----    | ----- | TT-C  | -GT-G--AT  |      |

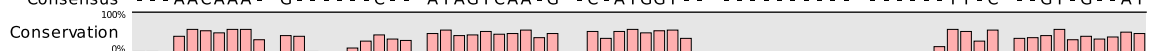

|                                | 3,860      | 3,880        | 3,900       | 3,920      |            |              |                 |      |
|--------------------------------|------------|--------------|-------------|------------|------------|--------------|-----------------|------|
| Stu-rnd-1_family-417_LINE_RTE  | -----      | -----        | -----       | -----      | 306        |              |                 |      |
| Sly-rnd1_family377-LINE/RTEBov | -----      | -----        | -----       | -----      | 135        |              |                 |      |
| Stu-rnd-1_family-489_LINE_RTE  | -----      | -----        | -----       | -----      | 87         |              |                 |      |
| Stu-rnd-1_family-607_LINE_RTE  | -----      | -----        | -----       | -----      | 671        |              |                 |      |
| Stu-rnd-1_family-645_LINE_RTE  | -----      | -----        | -----       | -----      | 437        |              |                 |      |
| Sly-rnd4_family81-LINE/RTEBovB | -----      | -----        | -----       | -----      | 861        |              |                 |      |
| Stu-rnd-6_family-408_LINE_RTE  | -----      | -----        | -----       | -----      | 393        |              |                 |      |
| Stu-rnd-1_family-351_LINE_RTE  | -----      | -----        | -----       | -----      | 609        |              |                 |      |
| Stu-rnd-1_family-382_LINE_RTE  | -----      | -----        | -----       | -----      | 347        |              |                 |      |
| Sly-rnd6_family746-LINE/RTEBov | -----      | -----        | -----       | -----      | 122        |              |                 |      |
| Stu-rnd-5_family-325_LINE_RTE  | -----      | -----        | -----       | -----      | 446        |              |                 |      |
| Sly-rnd4_family509-LINE/RTEBov | -----      | -----        | -----       | -----      | 743        |              |                 |      |
| Stu-rnd-1_family-513_LINE_RTE  | -----      | -----        | -----       | -----      | 65         |              |                 |      |
| Sly-rnd5_family1442-LINE/RTEBo | -----      | -----        | -----       | -----      | 119        |              |                 |      |
| BovB_GI-RTE-Gehyra_lazelli     | -----GT    | ATGGCTGC     | -----GAGAGC | TGGACTA-TA | AGGAAGG    | -----CTGAGCG | -----CCGCAGAAT  | 2990 |
| BovB_Gv-RTE-Gehyra_variegata   | -----GT    | ATGGCTGC     | -----GAGAGC | TGGACTA-TA | AGGAAGG    | -----CTGAGCG | -----CCGCAGAAT  | 2917 |
| BovB_PMo-RTE-Python_molurus    | -----GT    | ATGGCTGT     | -----GAGAGC | TGGACCA-TA | AAGAAAG    | -----CTGAGCG | -----CCGAAGAAT  | 2849 |
| BovB_Oa-RTE-Ovis_aries         | -----GT    | ATGGATGT     | -----GAGAGT | TGGACCA-TA | AAGAAAG    | -----CTGAGCA | -----CCGAAGAAT  | 2885 |
| BovB-RTE-Bos_taurus            | -----GT    | ATGGATGT     | -----GAGAGT | TGGACTG-TG | AAGAAAG    | -----CTGAGCG | -----CCGAAGAAT  | 3473 |
| BovB_Me-RTE-Macropus_eugenii   | -----AT    | ATGACCAT     | -----GAGAGC | TAGACTA-TA | AGGAAAC    | -----CTGAACA | -----CCATAGTAC  | 2443 |
| BovB_Ano-RTE-Amphibolurus_norr | -----GT    | ATGGAAGT     | -----GAGAGC | TGGACCA-TA | AAGAAAG    | -----CAGACCG | -----CCGAAGAAT  | 2922 |
| BovB_Gd-RTE-Eremiascincus_doug | -----GT    | ATGGCTGT     | -----GAGAGT | TGGACCA-TA | AGGAAGG    | -----CAGAGCG | -----CCGAAGAAT  | 2512 |
| BovB_Er-RTE-Eremiascincus_rich | -----GT    | ATGGCTGT     | -----GAGAGC | TGGACCA-TA | AGGAAGG    | -----CAGAGCG | -----CCGAAGAAT  | 3046 |
| BovB_Ca-RTE-Ctenotus_atlas     | -----GT    | ATGGCTGT     | -----GAGAGC | TGGACCA-TA | AGAAAGG    | -----CAGAGCG | -----CCGAAGAAT  | 3038 |
| BovB_Es-RTE-Egernia_stokesii   | -----GT    | ATGGCTGT     | -----GAGAGC | TGGACCA-TA | AGGAGGG    | -----CTGAGTG | -----CCAAAGAAT  | 2873 |
| BovB_Tr-RTE-Tiliqua_rugosa     | -----GT    | ATGGCTGT     | -----GAGAGC | TGGACCA-TA | AGGAGGG    | -----CTGAGCG | -----CCGAAGAAT  | 2886 |
| BovB_ALi-RTE-Amblyomma_limbatu | -----GT    | ATGGCTGTG    | -----AAAGTT | TAGACAA-AA | AAAAAGC    | -----TCAAGCG | -----TAAAACTTT  | 3056 |
| BovB_Hs-RTE-Hydrophis_spiralis | CCCCAGTTGT | ATGGCTGT     | -----GAAAGT | TGGACCA-TA | AGGAAGG    | -----CTGAGCA | -----CCAAAGAAT  | 1269 |
| BovB_VA-RTE-Vipera_ammodytes   | -----GT    | ATGGCAGT     | -----GAAAGC | TGGACCA-TA | AAAAAGG    | -----CTGAGCG | -----CCAAAGAAT  | 2843 |
| BovB_ACo-RTE-Agkistrodon_conto | -----GT    | ATGGCTGT     | -----GAAAGT | TGGACCA-TA | AGAAAGG    | -----CTGAGCG | -----CCAAAGAAT  | 2842 |
| BovB_Pg-RTE-Perameles_gunnii   | GT-----    | ATAGCTGT     | -----GAGAGT | TGGACTA-TA | AGGAAAA    | -----CTGAATG | -----CTGCAGAAT  | 1022 |
| BovB_lo-RTE-Isoodon_obesulus   | GT-----    | ATGACTAT     | -----GAGAAT | TCAATTA-TA | AGGAAAG    | -----CTGAGCA | -----CTGCAGAAT  | 1483 |
| BovB_Bp-RTE-Burramys_parvulus  | GTC-----   | AAATGGCTATAA | GAAGGAGAGT  | TGGACTA-TA | AGGAAAGAAA | AGCCTGAGCA   | -----TTACAGAAT  | 1601 |
| BovB_Pb-RTE-Petaurus_breviceps | GT-----    | ATGGTTGT     | -----GAGAGT | TGGACTA-TA | AGGAAAG    | -----CTGAGCA | -----CTCCAGAAT  | 1612 |
| BovB_Ma-RTE-Macropus_antilopin | GT-----    | ATGGCTGT     | -----GAGAGT | TGGACTA-TA | AGGAAAG    | -----CTGAGTG | -----CTGCAGAAT  | 2958 |
| BovB_Af-RTE-Antechinus_flavipe | AT-----    | ATAGCTGT     | -----GAAAT  | TAGATTA-TA | ATGAAAG    | -----CTAAAGA | -----A--AGAAAT  | 2150 |
| BovB_Ac-RTE-Anolis_carolinensi | C-----     | TATGGATGC    | -----GAGAGC | TGGACCAATA | AGGAAAG    | -----CTGAGCG | -----AAGGAAGAT  | 2822 |
| BovB_BM-RTE-Bombyx_mori        | -----AT    | ACG--GAG--   | CGGAGACC    | TGGACCT-T  | AAAGCAG    | -----CTGATCG | -----CAAAACGCGT | 2650 |
| BovB_Dr-RTE-Christinus         | -----GT    | ATG--CAT--   | GTGAGAGC    | TGGACACT-C | AAGAAGA    | -----AAGACAG | -----AAGGAAGAT  | 2716 |
| BovB_La-RTE-Loxodonta_africana | -----AT    | ATG--CAT--   | GTGAAAGC    | TGGACAAT-G | AATAAGG    | -----AAGACCA | -----AAGAAGAAT  | 2839 |
| BovB_Pc-RTE-Procavia_capensis  | -----AT    | ATG--CAT--   | GTGAAAGC    | TGGACAAT-G | AACAAAG    | -----AAGACAG | -----AAGAAGAAT  | 2838 |
| BovB_Et-RTE-Christinus         | -----AT    | ATG--TG--    | GCGATGA-    | -----      | -----      | -----        | -----           | 2573 |
| BovB_Ta-RTE-Tachyglossus_acule | -----GT    | ATG--GAT--   | CTGAAAGC    | TGGACAGT-G | AAAAAAC    | -----AGGATAG | -----AAAGAACAT  | 2978 |
| BovB_Plat-RTE-Ornithorhynchus  | -----GT    | ATG--GAT--   | CCGAAAGC    | TGGACAGT-G | AAAAAAC    | -----AGGATAG | -----AAAGAACAT  | 2967 |
| BovB_Ec-RTE-Equus_caballus     | -----GT    | ACA--GGT--   | GTGAAAGC    | TGGACAGT-G | AAGAAGG    | -----CTGACAG | -----GAAAAAAAT  | 2738 |
| BovB_Cg-RTE-Christinus         | -----GT    | ATAATGGGT    | GTGAAAGC    | TGGACAGTTG | AAGAAAG    | -----CTGACAG | -----GAAAGAAAGT | 2269 |
| BovB_Bh-RTE-Bothriocroton_hydr | -----GT    | ATGGCTGT     | -----GAGAGC | TGGACCA-TA | AGAAAGG    | -----TAGAGTG | -----CCGAAGAAT  | 1287 |
| BovB_MI-RTE-Gehyra_variegata   | T-----     | ATATTTGT     | -----GAGATT | TGGACTA-AA | AAGAAAC    | -----TTGAATA | -----TAAC       | 1359 |
| Sly-rnd1_family284-LINE/RTEBov | -----      | -----        | -----       | -----      | -----      | -----        | -----           | 56   |
| Sly-rnd5_family2019-LINE/RTEBo | -----      | -----        | -----       | -----      | -----      | -----        | -----           | 477  |
| Sly-rnd3_family322-LINE/RTEBov | -----      | -----        | -----       | -----      | -----      | -----        | -----           | 568  |
| Sly-rnd5_family1698-LINE/RTEBo | -----      | -----        | -----       | -----      | -----      | -----        | -----           | 231  |
| Sly-rnd1_family795-LINE/RTEBov | -----      | -----        | -----       | -----      | -----      | -----        | -----           | 538  |
| Stu-rnd-5_family-3162_LINE_RTE | -----      | -----        | -----       | -----      | -----      | -----        | -----           | 2547 |
| Sly-rnd6_family1960-LINE/RTEBo | -----      | -----        | -----       | -----      | -----      | -----        | -----           | 1316 |
| Stu-rnd-5_family-2493_LINE_RTE | -----      | -----        | -----       | -----      | -----      | -----        | -----           | 215  |
| Sly-rnd5_family447-LINE/RTEBov | -----      | -----        | -----       | -----      | -----      | -----        | -----           | 564  |
| Stu-rnd-6_family-2093_LINE_RTE | -----      | -----        | -----       | -----      | -----      | -----        | -----           | 105  |
| Consensus                      | -----      | ATG--GT--    | -----GA-AG- | TGGAC-A--  | A--AA-G--  | -----C-GA--  | -----AGAAT      |      |
| Conservation                   | 0%         |              |             |            |            |              |                 |      |



|                                | 3,940                  |            | 3,960                |            | 3,980      |            |            |
|--------------------------------|------------------------|------------|----------------------|------------|------------|------------|------------|
| Stu-rnd-1_family-417_LINE_RTE  | -----                  | -----      | -----                | -----      | -----      | 306        |            |
| Sly-rnd1_family377-LINE/RTEBov | -----                  | -----      | -----                | -----      | -----      | 135        |            |
| Stu-rnd-1_family-489_LINE_RTE  | -----                  | -----      | -----                | -----      | -----      | 87         |            |
| Stu-rnd-1_family-607_LINE_RTE  | -----                  | -----      | -----                | -----      | -----      | 671        |            |
| Stu-rnd-1_family-645_LINE_RTE  | -----                  | -----      | -----                | -----      | -----      | 437        |            |
| Sly-rnd4_family81-LINE/RTEBovB | -----                  | -----      | -----                | -----      | -----      | 861        |            |
| Stu-rnd-6_family-408_LINE_RTE  | -----                  | -----      | -----                | -----      | -----      | 393        |            |
| Stu-rnd-1_family-351_LINE_RTE  | -----                  | -----      | -----                | -----      | -----      | 609        |            |
| Stu-rnd-1_family-382_LINE_RTE  | -----                  | -----      | -----                | -----      | -----      | 347        |            |
| Sly-rnd6_family746-LINE/RTEBov | -----                  | -----      | -----                | -----      | -----      | 122        |            |
| Stu-rnd-5_family-325_LINE_RTE  | -----                  | -----      | -----                | -----      | -----      | 446        |            |
| Sly-rnd4_family509-LINE/RTEBov | -----                  | -----      | -----                | -----      | -----      | 743        |            |
| Stu-rnd-1_family-513_LINE_RTE  | -----                  | -----      | -----                | -----      | -----      | 65         |            |
| Sly-rnd5_family1442-LINE/RTEBo | -----                  | -----      | -----                | -----      | -----      | 119        |            |
| BovB_GI-RTE-Gehyra_lazelli     | AGAT-----T CTTTTGAATT  | ATGGTGC-TG | GA-----G AAGACTCTT   | GAGAG-TCCC | TTGGAC---- | 3041       |            |
| BovB_Gv-RTE-Gehyra_variegata   | AGAT-----T CTTTTGAATT  | ATGGTGC-TG | GA-----G AAGACTCTT   | GAGAG-TCCC | TTGGAC---- | 2968       |            |
| BovB_PMo-RTE-Python_molurus    | TGAT-----G CTTTTGAACT  | GTGGTGC-TG | GA-----G AAGACTCTT   | GAGAG-TCCC | CTGGAC---- | 2900       |            |
| BovB_Oa-RTE-Ovis_aries         | TGAT-----G CTTTTGAACT  | GTGGTGC-TG | GA-----G AAGACTCTT   | GAGAG-TCCC | TTGGAC---- | 2936       |            |
| BovB-RTE-Bos_taurus            | TGAT-----G CTTTTGAACT  | GTGGTGC-TG | GA-----G AAGACTCTT   | GAGAG-TCCC | TTGGAC---- | 3524       |            |
| BovB_Me-RTE-Macropus_eugenii   | TGAT-----G CTTTTGAATA  | TTGGTCT-TT | GA-----G AAGACTTCT   | GAGAG-TCCC | TTGGAC---- | 2494       |            |
| BovB_Ano-RTE-Amphibolurus_norr | TGAT-----G CTTTTGAATT  | GTGGTGC-TG | GA-----G GAGGCTCTT   | GAGAG-TCCC | CTGGAC---- | 2973       |            |
| BovB_Gd-RTE-Eremiascincus_doug | AGAT-----G CTTTTGAATT  | ATGGTGC-TG | GA-----G AAGACTCTT   | GAGAG-TCCC | CTGGAC---- | 2563       |            |
| BovB_Er-RTE-Eremiascincus_rich | AGAT-----G CTTTTGAATT  | ATGGTGC-TG | GA-----G AAGACTCTT   | GAGAG-TCCC | CTGGAC---- | 3097       |            |
| BovB_Ca-RTE-Ctenotus_atlas     | AGAT-----G CTTTTGAATT  | ATGGTGC-TG | GA-----G AAGACTCTT   | GAGAG-TCCC | CTGGAC---- | 3089       |            |
| BovB_Es-RTE-Egernia_stokesii   | AGAT-----G CTTTTGAATT  | ATGGTGC-TG | GA-----G AAGACTCTT   | GAGAG-TCCC | CTGGAC---- | 2924       |            |
| BovB_Tr-RTE-Tiliqua_rugosa     | AGAT-----G CTTTTGAATT  | ATGGTGC-TG | GA-----G AAGACTCTT   | GAGAG-TCCC | CTGGAC---- | 2937       |            |
| BovB_ALi-RTE-Amblyomma_limbatu | TGGATTCAGG CTTTTGAATT  | GTTGTGC-TC | GG-----AG GAGACTCCT  | GGCGAGTCCC | ATGGAC---- | 3114       |            |
| BovB_Hs-RTE-Hydrophis_spiralis | TGGA-----GG CTTTTGAACT | ATGGTGC-TG | GAGGTGGAAG AACACTCCT | GCGAGTCCC  | TTGGAC---- | 1329       |            |
| BovB_VA-RTE-Vipera_ammodytes   | TGA-----GG CTTTTGAACT  | ATGGTGC-TG | GA-----G AAGACTCCT   | GCGAG-TCCC | TTGGAC---- | 2894       |            |
| BovB_ACo-RTE-Agkistrodon_conto | TGA-----GG CTTTTGAACT  | ATGGTGC-TG | GA-----G AAGACTCCT   | GCGAG-TCCC | CTGGAC---- | 2893       |            |
| BovB_Pg-RTE-Perameles_gunnii   | CAAT-----GC TTT-CAAATT | GTGGTGCATG | GA-----G AAGAATTTT   | GAGAGTC-CC | TTGGAC---- | 1074       |            |
| BovB_Io-RTE-Isodon_obesulus    | AGAT-----GC AAT-CAAATT | ATGGTGC-TG | GA-----G AAGACTTTT   | GAGAGTC-CC | TTGGGCACA  | 1538       |            |
| BovB_Bp-RTE-Burramys_parvulus  | CAAT-----AC TTTTCAAATT | GTGGTGC-TG | GA-----G AAGACTTTT   | GAGAGTC-CT | TTGGAC---- | 1654       |            |
| BovB_Pb-RTE-Petaurus_breviceps | TGAT-----GC TTT-CAAATT | GTGGTGC-TA | AA-----G AAGACTTTT   | GAGAGTC-CC | TTGGAC---- | 1664       |            |
| BovB_Ma-RTE-Macropus_antilopin | CAAT-----GC TTT-TGAATT | GTGGTGC-TG | GA-----G AAGACTTTT   | GAGAGTC-CC | TTGGAC---- | 3009       |            |
| BovB_Af-RTE-Antechinus_flavipe | CAAA-----AA CTTTCAAATT | GTGATGC-TA | GA-----A AAGACTTTT   | GAGAGTTACC | TTGGAC---- | 2203       |            |
| BovB_Ac-RTE-Anolis_carolinensi | AGAC-----G CTTTTGAACT  | CTGGTGC-TG | GA-----G GAAAATCCT   | GAGAG-TGCC | TTGGAC---- | 2873       |            |
| BovB_BM-RTE-Bombyx_mori        | GGAT-----G CTTTTGAGAT  | GTGGTGC-TG | GA-----G AAGAATGCT   | CCGGA-TACC | TTGGAC---- | 2701       |            |
| BovB_Dr-RTE-Christinus         | CGAT-----G CTTTTGAGTT  | GTGGTGC-TG | GA-----G GCGAATGAT   | GCAC--TACC | ATGGAC---- | 2766       |            |
| BovB_La-RTE-Loxodonta_africana | TGAC-----G CTTTTGAATT  | GTGGTGC-TG | GC-----G AAGAATATT   | GAATA-T-CC | ATGGAC---- | 2889       |            |
| BovB_Pc-RTE-Procavia_capensis  | TGAT-----G CTTTTGAATT  | GTGGTGC-TG | GA-----G AAGAATGTT   | GAATG-TACC | ATGGAC---- | 2889       |            |
| BovB_Et-RTE-Christinus         | -----                  | -----      | -----                | -----      | -----      | 2573       |            |
| BovB-Ta-RTE-Tachyglossus_acule | CGAT-----T CTTTTGAAAT  | GTGGTGC-TG | GA-----G AAGGCTTTT   | GTGAA-TACC | ATGGAC---- | 3029       |            |
| BovB_Plat-RTE-Ornithorhynchus  | CGAT-----T CTTTTGAAAT  | GTGGTGC-TG | GA-----G AAGGCTTTT   | GCGAA-TACC | ATGGAC---- | 3018       |            |
| BovB_Ec-RTE-Equus_caballus     | TGAT-----T CATTTGAAT   | ATGGTGC-TG | GA-----G GAGAGCTCT   | ACGGA-TACC | CTGGAC---- | 2789       |            |
| BovB_Cg-RTE-Christinus         | AGAT-----T CTTTTGAAAT  | GTGGTGC-TG | GA-----G GAGAGTTT    | ACGGA-TACC | GTGGAC---- | 2321       |            |
| BovB_Bh-RTE-Bothriocroton_hydr | AGATTT--GT TTTTGAATT   | ATGGTGC-TG | GA-----G AAGACTTTT   | GAGAG-TCCC | ATGGAC---- | 1341       |            |
| BovB_MI-RTE-Gehyra_variegata   | TGAA----- --TTGAATCT   | ATTGGAC-TA | GA-----G TAGGCTTTT   | GAGAA-TCTA | TTGGAT---- | 1407       |            |
| Sly-rnd1_family284-LINE/RTEBov | -----                  | -----      | -----                | -----      | -----      | 56         |            |
| Sly-rnd5_family2019-LINE/RTEBo | -----                  | -----      | -----                | -----      | -----      | 477        |            |
| Sly-rnd3_family322-LINE/RTEBov | -----                  | -----      | -----                | -----      | -----      | 568        |            |
| Sly-rnd5_family1698-LINE/RTEBo | -----                  | -----      | -----                | -----      | -----      | 231        |            |
| Sly-rnd1_family795-LINE/RTEBov | -----                  | -----      | -----                | -----      | -----      | 538        |            |
| Stu-rnd-5_family-3162_LINE_RTE | -----                  | -----      | -----                | -----      | -----      | 2547       |            |
| Sly-rnd6_family1960-LINE/RTEBo | -----                  | -----      | -----                | -----      | -----      | 1316       |            |
| Stu-rnd-5_family-2493_LINE_RTE | -----                  | -----      | -----                | -----      | -----      | 215        |            |
| Sly-rnd5_family447-LINE/RTEBov | -----                  | -----      | -----                | -----      | -----      | 564        |            |
| Stu-rnd-6_family-2093_LINE_RTE | -----                  | -----      | -----                | -----      | -----      | 105        |            |
| Consensus                      | -GA-----               | C-TT-GAA-T | -TGGTG--TG           | GA-----G   | AAGACT--T  | G-GA--T-CC | -TGGAC---- |

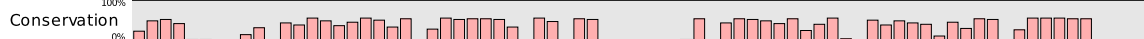



|                                 | 4,000      | 4,020      | 4,040      | 4,060      |                                      |      |
|---------------------------------|------------|------------|------------|------------|--------------------------------------|------|
| Stu-rnd-1_family-417_LINE_RTE   |            |            |            |            | 306                                  |      |
| Sly-rnd1_family377-LINE/RTEBov  |            |            |            |            | 135                                  |      |
| Stu-rnd-1_family-489_LINE_RTE   |            |            |            |            | 87                                   |      |
| Stu-rnd-1_family-607_LINE_RTE   |            |            |            |            | 671                                  |      |
| Stu-rnd-1_family-645_LINE_RTE   |            |            |            |            | 437                                  |      |
| Sly-rnd4_family81-LINE/RTEBovB  |            |            |            |            | 861                                  |      |
| Stu-rnd-6_family-408_LINE_RTE   |            |            |            |            | 393                                  |      |
| Stu-rnd-1_family-351_LINE_RTE   |            |            |            |            | 609                                  |      |
| Stu-rnd-1_family-382_LINE_RTE   |            |            |            |            | 347                                  |      |
| Sly-rnd6_family746-LINE/RTEBov  |            |            |            |            | 122                                  |      |
| Stu-rnd-5_family-325_LINE_RTE   |            |            |            |            | 446                                  |      |
| Sly-rnd4_family509-LINE/RTEBov  |            |            |            |            | 743                                  |      |
| Stu-rnd-1_family-513_LINE_RTE   |            |            |            |            | 65                                   |      |
| Sly-rnd5_family1442-LINE/RTEBo  |            |            |            |            | 119                                  |      |
| BovB_GI-RTE-Gehyra_lazelli      | TGCAA-AGAG | ATCA-AATC  | AGTCAATCCT | AAAAGAAATC | A ACCCT - - - - -GACTGTT-C           | 3092 |
| BovB_Gv-RTE-Gehyra_variegata    | TGCAA-GGAG | ATCG-AATC  | AGTCAGTCCT | AAAAGAAATC | A ACCCT - - - - -GACTGTT-C           | 3019 |
| BovB_PMo-RTE-Python_molurus     | TGCTA-GGAG | GTCA-AAAC  | AGTCAATCTT | AAAGGAAATC | A ACCCT - - - - -GATTGCT-C           | 2951 |
| BovB_Oa-RTE-Ovis_aries          | TGCAA-GGAG | ATCA-AAAC  | AGTCAATCCT | AAAGGAAATC | A ACCCT - - - - -GAATATT-C           | 2987 |
| BovB-RTE-Bos_taurus             | TGCAA-GGAG | ATCC-AAAC  | AGTCCATTCT | GAAGGAGATC | A GCCCT - - - - -GGGATTT-C           | 3575 |
| BovB_Me-RTE-Macropus_eugenii    | AGTAAAGGAG | ATCA-AATC  | AGTATTAATT | TAATGAAATT | A ATTCA - - - - -GACTGTT-C           | 2546 |
| BovB_Ano-RTE-Amphibolurus_norr  | TGCAA-GGAG | AACA-AAAC  | TATCAATTCT | AAAGGAAATC | A ACCCT - - - - -GAGTGCT-C           | 3024 |
| BovB_Gd-RTE-Eremiascincus_doug  | TGCAA-GGAG | ATCC-AAAC  | GGTCAATCCT | ACAGGAAATC | A AGCCT - - - - -GATTGCT-C           | 2614 |
| BovB_Er-RTE-Eremiascincus_rich  | TGCAA-GGAG | ATCC-AAAC  | GGTCAATCCT | CCAGGAAATC | A AGCCT - - - - -GATTGCT-C           | 3148 |
| BovB_Ca-RTE-Ctenotus_atlas      | TGCAA-GGAG | ATCC-AAAC  | GGTCAATCCT | CCAGGAAATC | A AGCCT - - - - -GATTGCT-C           | 3140 |
| BovB_Es-RTE-Egernia_stokesii    | TGCAA-GGAG | ATCA-AATC  | AGTCAATCCT | ACAGGAAATC | A ACCCT - - - - -GACTGTT-C           | 2975 |
| BovB_Tr-RTE-Tiliqua_rugosa      | TGCAA-GGAG | ATCA-AATC  | AGTCAATCCT | ACAGGAAATC | A ACCCT - - - - -GACTGTT-C           | 2988 |
| BovB_ALi-RTE-Amblyomma_limbatu  | TGCAAGAC-A | ATCA-AAAC  | GGTCAGTCTT | AGAGAAGATA | A ACCCT - - - - -GACTGCT-C           | 3165 |
| BovB_Hs-RTE-Hydrophis_spiralis  | TGCAAGGCCG | ATCATAACT  | GGTCAGTCTT | AGAGGAGATG | CCA--ATTCA ACCCT - - - - -GACTGCT-C  | 1389 |
| BovB_VA-RTE-Vipera_ammodytes    | TGCAAGGC-G | ATCA-AAAC  | GGTCAGTCCT | AGAGGAGATC | A ACCCT - - - - -GACTGCT-C           | 2945 |
| BovB_ACo-RTE-Agkistrodon_conto  | TGCAAGGC-G | ATCA-AAAC  | GGTCAGTCCT | AGAGGAGATC | A ACCCT - - - - -GACTGCT-C           | 2944 |
| BovB_Pg-RTE-Perameles_gunnii    | AACAA-GGAG | ATCAAATC-  | AGTCAATATT | TAAAGAAATT | AT----AATT ATTCA - - - - -GACTATTT-C | 1131 |
| BovB_lo-RTE-Isodon_obesulus     | AATAA-AGAA | ATCAAATGA  | AATCAATACT | TAAAGAAATC | A-----ATTCA - - - - -AACTATT-C       | 1591 |
| BovB_Bp-RTE-Burramys_parvulus   | AGCAA-GGAG | ATCAAATCA  | GGTCAATACT | TAAAGAAATT | A-----ATTCAAA--A AGGCTATT-C          | 1711 |
| BovB_Pb-RTE-Petaurus_breviceps  | AGCAA-GGAG | ATCAA-TCA  | G-TCAATACT | TAAAGAAATT | A-----ATTCA - - - - -GGCTATT-C       | 1715 |
| BovB_Ma-RTE-Macropus_antilopin  | AGCAA-GGAG | ATCAAATC-  | AGTCAATACT | TAAAGAAATT | A-----ATTCA - - - - -GACTATT-C       | 3060 |
| BovB_Af-RTE-Antechinus_flavipe  | AGTAA-GGAG | ATCAA-TAC  | AATCAATACT | TAAAGAAATT | AATTCAGACT ATTCATTTTG GAACTATTTA     | 2271 |
| BovB_Ac-RTE-Anolis_carolinensis | CGCAA-GAAG | ATCC-AAAC  | AGTCCACACT | CCAGGAAATA | A-----T GCCC - - - - -GACTGCT-C      | 2924 |
| BovB_BM-RTE-Bombyx_mori         | --AG-TGAG  | AGAAGCAATC | AGTCTATCTT | AGATCAACTG | CA-----G ATCAA - - - - -GACTAGA-C    | 2754 |
| BovB_Dr-RTE-Christinus          | --GG-CGAGG | ATCACAAACA | AAACAACCTT | GCAGCG-TG  | TC-----A AACAA - - - - -AATGTAT-C    | 2817 |
| BovB_La-RTE-Loxodonta_africana  | --TC-CCAAA | AGAACAACA  | AATCTGTCTT | GGAAGAA-G  | TA-----C AACCA - - - - -GAATGCT-C    | 2940 |
| BovB_Pc-RTE-Procavia_capensis   | --TG-CCAAA | AGAACAACA  | GATCTGTCTT | GGAAGAA-G  | TA-----C AACCA - - - - -GAGTGCT-C    | 2940 |
| BovB_Et-RTE-Christinus          |            |            |            |            |                                      | 2573 |
| BovB-Ta-RTE-Tachyglossus_acule  | --TG-CCCGA | AAAACAACA  | AATGGATTTT | AGAGCAA--A | TT-----A AACCA - - - - -AAGTGGT-C    | 3080 |
| BovB_Plat-RTE-Ornithorhynchus   | --TG-CCCGA | AAAACAACA  | AATGGATTTT | GGAGCAA--A | TT-----A AACCA - - - - -AAGTGGT-C    | 3069 |
| BovB_Ec-RTE-Equus_caballus      | --TG-CCAGA | AAGATGAACA | AGTGGTCTCT | AGAGCAA--A | TT-----A AGCCT - - - - -GAAGTAT-C    | 2840 |
| BovB_Cg-RTE-Christinus          | --TG-CCAAA | AAGACAAATA | AGTGGTCTCT | AGATCAA--A | TC-----A AGCCT - - - - -GAAGTAT-C    | 2373 |
| BovB_Bh-RTE-Bothriocroton_hydr  | TGTAA-AGAG | ATCTAATCC- | -GTCAATTCT | TCAGGAAATC | -----A AGCCT - - - - -GATTATT-C      | 1392 |
| BovB_MI-RTE-Gehyra_variegata    | --TTCAAAA  | TTATCAATA  | AGTCAATGCT | TAAGGAAAT  | CAGAC-----                           | 1449 |
| Sly-rnd1_family284-LINE/RTEBov  |            |            |            |            | 56                                   |      |
| Sly-rnd5_family2019-LINE/RTEBo  |            |            |            |            | 477                                  |      |
| Sly-rnd3_family322-LINE/RTEBov  |            |            |            |            | 568                                  |      |
| Sly-rnd5_family1698-LINE/RTEBo  |            |            |            |            | 231                                  |      |
| Sly-rnd1_family795-LINE/RTEBov  |            |            |            |            | 538                                  |      |
| Stu-rnd-5_family-3162_LINE_RTE  |            |            |            |            | 2547                                 |      |
| Sly-rnd6_family1960-LINE/RTEBo  |            |            |            |            | 1316                                 |      |
| Stu-rnd-5_family-2493_LINE_RTE  |            |            |            |            | 215                                  |      |
| Sly-rnd5_family447-LINE/RTEBov  |            |            |            |            | 564                                  |      |
| Stu-rnd-6_family-2093_LINE_RTE  |            |            |            |            | 105                                  |      |
| Consensus                       |            | ATCA-AA    | --TC--T-CT | --A-GAA--  | A--C-----GA-T--T-C                   |      |

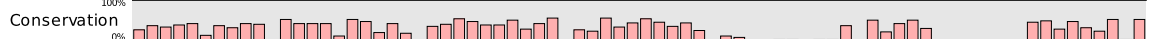

|                                | 4,080                                                                  | 4,100 | 4,120 |                  |
|--------------------------------|------------------------------------------------------------------------|-------|-------|------------------|
| Stu-rnd-1_family-417_LINE_RTE  | -----                                                                  | ----- | ----- | 306              |
| Sly-rnd1_family377-LINE/RTEBov | -----                                                                  | ----- | ----- | 135              |
| Stu-rnd-1_family-489_LINE_RTE  | -----                                                                  | ----- | ----- | 87               |
| Stu-rnd-1_family-607_LINE_RTE  | -----                                                                  | ----- | ----- | 671              |
| Stu-rnd-1_family-645_LINE_RTE  | -----                                                                  | ----- | ----- | 437              |
| Sly-rnd4_family81-LINE/RTEBovB | -----                                                                  | ----- | ----- | 861              |
| Stu-rnd-6_family-408_LINE_RTE  | -----                                                                  | ----- | ----- | 393              |
| Stu-rnd-1_family-351_LINE_RTE  | -----                                                                  | ----- | ----- | 609              |
| Stu-rnd-1_family-382_LINE_RTE  | -----                                                                  | ----- | ----- | 347              |
| Sly-rnd6_family746-LINE/RTEBov | -----                                                                  | ----- | ----- | 122              |
| Stu-rnd-5_family-325_LINE_RTE  | -----                                                                  | ----- | ----- | 446              |
| Sly-rnd4_family509-LINE/RTEBov | -----                                                                  | ----- | ----- | 743              |
| Stu-rnd-1_family-513_LINE_RTE  | -----                                                                  | ----- | ----- | 65               |
| Sly-rnd5_family1442-LINE/RTEBo | -----                                                                  | ----- | ----- | 119              |
| BovB_GI-RTE-Gehyra_lazelli     | TCTGG--AAGGCCAGATACTG-----AAGC-TGAAGCTC-AAATA-CTTTGGCCACCAAATGAGAAGGGA |       |       | 3152             |
| BovB_Gv-RTE-Gehyra_variegata   | TCTGG--AAGGCCAGATACTG-----AAGC-TGAAGCTC-AAATA-CTTTGGCCACCAAATGAGAAGGGA |       |       | 3079             |
| BovB_PMo-RTE-Python_molurus    | ATTGG--AAGGAT-GATAATG-----AAGC-TCAAGCTC-AGATA-CTTTGGTACCTAA            |       |       | TGCGAAGAGA 3010  |
| BovB_Oa-RTE-Ovis_aries         | ATTGG--AAGGACTGATGCTG-----AAGC-TGAAGCTC-CAATA-CTTTGGCCACCTGA           |       |       | TGTGAAGAGC 3047  |
| BovB-RTE-Bos_taurus            | TTTGG--AAGGAATGATGCTA-----AAGC-TGAAACTC-CAGTA-CTTTGGCCACCTCA           |       |       | TGCGAAGAGT 3635  |
| BovB_Me-RTE-Macropus_eugenii   | TCTGG--AAGGTCAAATACTG-----AAGC-TGAAGCTC-CAATA-CTTTGGCCACCTCA           |       |       | 2564             |
| BovB_Ano-RTE-Amphibolurus_norr | ACTGG--AAGGACAGATCCTG-----AAGC-TGAGGCTC-CAGTA-CTTTGGCCATCTCA           |       |       | TGAGAAGAAA 3084  |
| BovB_Gd-RTE-Eremiascincus_doug | CTTGG--AAGGACAAATCCTG-----AAGC-TGAAGCTC-CAATA-CTTTGGCCACCTCA           |       |       | TGAGAAGAGA 2674  |
| BovB_Er-RTE-Eremiascincus_rich | CTTGG--AAGGACAAATCCTG-----AAGC-TGAAGCTC-CAATA-CTTTGGCCACCTCA           |       |       | TGAGAAGAGA 3208  |
| BovB_Ca-RTE-Ctenotus_atlas     | CTTGG--AAGGACAAATCCTG-----AAGC-TGAAGCTC-CAATA-CTTTGGCCACCTCA           |       |       | TGAGAAGAGA 3200  |
| BovB_Es-RTE-Egernia_stokesii   | ATTGG--AAGGACAGATGCTG-----AAGC-TGAAGCTT-AAATA-CTTTGGTCATCTCA           |       |       | TGAGAAGGGA 3035  |
| BovB_Tr-RTE-Tiliqua_rugosa     | ATTGG--AAGGACAGATGCTG-----AAGC-TGAAGCTT-AAATA-CTTTGGTCATCTCA           |       |       | TGAGAAGGGA 3048  |
| BovB_ALi-RTE-Amblyomma_limbatu | TTTTAG--AAGGCCAGATAGTC-----AAAGATGAAAACCTTAAATA-CTTTGACCACCTCA         |       |       | TGAGAAGGAA 3228  |
| BovB_Hs-RTE-Hydrophis_spiralis | TTTAGA--AAGGCCAGATCCTG-----AAGA GTGAAAACCTCAAAATA-CTTTGGCCACCTAA       |       |       | TGAGAAGGAA 1452  |
| BovB_VA-RTE-Vipera_ammodytes   | TTTAG--AAGGCCAGATCCTG-----AAGC-TAAAACCTC-AAATA-CTTTGGCCACCTAA          |       |       | TGAGAAGGAA 3005  |
| BovB_ACo-RTE-Agkistrodon_conto | TTTAG--AAGGCCAGATCCTG-----AAGT-TGAAAACCTC-AAGTA-CTTTGGCCACCTAA         |       |       | TGAGAAGGAA 3004  |
| BovB_Pg-RTE-Perameles_gunnii   | ATTGGA--AGGTCAAATACTG-----AAGC-TGAAGCTT-AAATA-CTTTGGTCATATAA           |       |       | TGAGAAGACA 1191  |
| BovB_lo-RTE-Isodon_obesulus    | ACTGAA--AGGTTAAATATTG-----AAAT-TGAAGCTT-AAATA-TTTTGAACACATAA           |       |       | TAAGAAAATA 1651  |
| BovB_Bp-RTE-Burramys_parvulus  | ATTGGA--AGGTCAAATACTG-----AAGC-TGAAGCTT-AAATA-TCTTTGGCCACATAA          |       |       | TGAGAAGACA 1774  |
| BovB_Pb-RTE-Petaurus_breviceps | ACTGGA--AGGTCAAATACTGAAAGCTAAGC-TGAAGCTT-AAATA-CTTTGGCCACATAA          |       |       | TGAGAAGACA 1780  |
| BovB_Ma-RTE-Macropus_antilopin | ACTGGA--AGGTCAAATACTG-----AAGC-TGAAGCTT-AAATA-CTTTGGCCACATAA           |       |       | TGAGAAGACA 3120  |
| BovB_Af-RTE-Antechinus_flavipe | AATGGAGAAGATCAAATACTG-----AAGC-TGAAACTT-AAATA-CTTTGGCCACATAA           |       |       | TGAGAAGACA 2333  |
| BovB_Ac-RTE-Anolis_carolinensi | ACTGG--AGGAAAGGATATTG-----GAGG-CAAAAGCTG-AAGTA-TTTTGGCCACATCA          |       |       | TGAGAAGACA 2984  |
| BovB_BM-RTE-Bombyx_mori        | TGTCCA-CAC T-CTGCCTTG-----TCGG-GC-ACTCGAGTACTTT--GGTCATATTG            |       |       | CTCGGAAAAAC 2812 |
| BovB_Dr-RTE-Christinus         | GCTAGA-GGG C-AAAATCACG-----AAGC-AACGGCTCTCGTTCTTT--GGTCATATCA          |       |       | TGCGAGCCAA 2877  |
| BovB_La-RTE-Loxodonta_africana | CTTAGA--AGCAAGGATGGC-----AGAC-TGCAGCGTACATACTTT--GGACATGTTA            |       |       | TCAGGAGGGA 3000  |
| BovB_Pc-RTE-Procavia_capensis  | CTTGGA--AGCAAGGATGGC-----AGAC-TGCATCTTACATACTTT--GGACATGTTG            |       |       | TCAGGAGGGA 3000  |
| BovB_Et-RTE-Christinus         | -----                                                                  | ----- | ----- | 2573             |
| BovB-Ta-RTE-Tachyglossus_acule | TTTGGGA--AGGC-CAAATGACT-----CGAC-TTAGATTAGCATATTTT--GGACACATAA         |       |       | TCAGGAGGAC 3140  |
| BovB_Plat-RTE-Ornithorhynchus  | TTTGGGA--AGGC-CAAATGACT-----CGAC-TTAGATTAGCATATTTT--GGACACATAA         |       |       | TCAGGAGGAC 3129  |
| BovB_Ec-RTE-Equus_caballus     | GCTGGA--GGCA-AAAATGATG-----AAAC-TGAGGCTGTCTACTTT--GGGCACATCA           |       |       | TGAGAAGGCA 2900  |
| BovB_Cg-RTE-Christinus         | CTTAGA--AGCTTAAAATGACT-----AAAC-TGAGGCTATCGTACTTTCCGGTCACATTA          |       |       | TGAGAAGACA 2436  |
| BovB_Bh-RTE-Bothriocroton_hydr | CCTGAA--AAGACAAATCCTG-----AAGC-AGAAGCTC-AAATA-CTTTGGCCACATCA           |       |       | TGAGAAGACA 1452  |
| BovB_MI-RTE-Gehyra_variegata   | -----                                                                  | ----- | ----- | 1449             |
| Sly-rnd1_family284-LINE/RTEBov | -----                                                                  | ----- | ----- | 56               |
| Sly-rnd5_family2019-LINE/RTEBo | -----                                                                  | ----- | ----- | 477              |
| Sly-rnd3_family322-LINE/RTEBov | -----                                                                  | ----- | ----- | 568              |
| Sly-rnd5_family1698-LINE/RTEBo | -----                                                                  | ----- | ----- | 231              |
| Sly-rnd1_family795-LINE/RTEBov | -----                                                                  | ----- | ----- | 538              |
| Stu-rnd-5_family-3162_LINE_RTE | -----                                                                  | ----- | ----- | 2547             |
| Sly-rnd6_family1960-LINE/RTEBo | -----                                                                  | ----- | ----- | 1316             |
| Stu-rnd-5_family-2493_LINE_RTE | -----                                                                  | ----- | ----- | 215              |
| Sly-rnd5_family447-LINE/RTEBov | -----                                                                  | ----- | ----- | 564              |
| Stu-rnd-6_family-2093_LINE_RTE | -----                                                                  | ----- | ----- | 105              |
| Consensus                      | --T-G-----G-----AT-----A-----T-----CT-----T--GG-CA--T-A T--G-A-----    |       |       |                  |

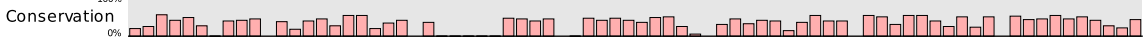

|                                | 4,140              | 4,160       | 4,180      | 4,200      |            |             |             |      |
|--------------------------------|--------------------|-------------|------------|------------|------------|-------------|-------------|------|
| Stu-rnd-1_family-417_LINE_RTE  | -----              | -----       | -----      | -----      | 306        |             |             |      |
| Sly-rnd1_family377-LINE/RTEBov | -----              | -----       | -----      | -----      | 135        |             |             |      |
| Stu-rnd-1_family-489_LINE_RTE  | -----              | -----       | -----      | -----      | 87         |             |             |      |
| Stu-rnd-1_family-607_LINE_RTE  | -----              | -----       | -----      | -----      | 671        |             |             |      |
| Stu-rnd-1_family-645_LINE_RTE  | -----              | -----       | -----      | -----      | 437        |             |             |      |
| Sly-rnd4_family81-LINE/RTEBovB | -----              | -----       | -----      | -----      | 861        |             |             |      |
| Stu-rnd-6_family-408_LINE_RTE  | -----              | -----       | -----      | -----      | 393        |             |             |      |
| Stu-rnd-1_family-351_LINE_RTE  | -----              | -----       | -----      | -----      | 609        |             |             |      |
| Stu-rnd-1_family-382_LINE_RTE  | -----              | -----       | -----      | -----      | 347        |             |             |      |
| Sly-rnd6_family746-LINE/RTEBov | -----              | -----       | -----      | -----      | 122        |             |             |      |
| Stu-rnd-5_family-325_LINE_RTE  | -----              | -----       | -----      | -----      | 446        |             |             |      |
| Sly-rnd4_family509-LINE/RTEBov | -----              | -----       | -----      | -----      | 743        |             |             |      |
| Stu-rnd-1_family-513_LINE_RTE  | -----              | -----       | -----      | -----      | 65         |             |             |      |
| Sly-rnd5_family1442-LINE/RTEBo | -----              | -----       | -----      | -----      | 119        |             |             |      |
| BovB_GI-RTE-Gehyra_lazelli     | AGA-----CTCACTGG   | --AGAAGACC  | CTGATGCTGG | GAA-----AG | ATT-----G  | AAGGGAAAAAG | 3200        |      |
| BovB_Gv-RTE-Gehyra_variegata   | AGA-----CTCACTGG   | --AGAAGACC  | CTGATGCTGG | GAA-----AG | ATT-----G  | AAGGGAAAAAG | 3127        |      |
| BovB_PMo-RTE-Python_molurus    | GGA-----CTCCTTTGG  | --AAAAGACC  | CTGATGCTGG | GAA-----AG | ATT-----G  | AAGGCCAAAAG | 3058        |      |
| BovB_Oa-RTE-Ovis_aries         | TGA-----CTCATTGG   | --AAAAGACC  | CTGATGCTGG | GAA-----AG | ATT-----G  | AAGGCAGGAG  | 3095        |      |
| BovB-RTE-Bos_taurus            | TGA-----CTCATTGG   | --AAAAGACT  | CTGATGCTGG | GAG-----GG | ATT-----G  | GGGGCAGGAG  | 3683        |      |
| BovB_Me-RTE-Macropus_eugenii   | -----              | -----       | -----      | -----      | -----      | -----       | 2564        |      |
| BovB_Ano-RTE-Amphibolurus_norr | AGA-----CTCCTTTGG  | --AAAAAACC  | TTGATGTTAG | GAA-----AG | TGT-----G  | ACGGCAAGAG  | 3132        |      |
| BovB_Gd-RTE-Eremiascincus_doug | GGA-----CTCCTTTAG  | --AAAAGACC  | CTCATGCTGG | GAA-----AG | ATG-----G  | AAGGCCAAAAG | 2722        |      |
| BovB_Er-RTE-Eremiascincus_rich | GGA-----CTCCTTTAG  | --AAAAGACC  | CTCATGCTGG | GAA-----AG | ATT-----G  | AAGGCCAAAAG | 3256        |      |
| BovB_Ca-RTE-Ctenotus_atlas     | GGA-----CTCCTTTAG  | --AAAAGACC  | CTCATGCTGG | GAA-----AG | ATT-----G  | AAGGCCAAAAG | 3248        |      |
| BovB_Es-RTE-Egernia_stokesii   | GGA-----CTCCTTTAG  | --AAAAGACC  | CTGATGCTGG | GAA-----AA | ATT-----G  | AAGGCCAAAAG | 3083        |      |
| BovB_Tr-RTE-Tiliqua_rugosa     | GGA-----CTCCTTTAG  | --AAAAGACC  | CTGATGCTGG | GAA-----AA | ATT-----G  | AAGGCCAAAAG | 3096        |      |
| BovB_ALi-RTE-Amblyomma_limbatu | GGA-----CTTC-CTGA  | --AGAAGAAT  | ATAATCTTCA | TATGCTTTAG | AACACTA--G | ATGGCAAAAA  | 3285        |      |
| BovB_Hs-RTE-Hydrophis_spiralis | GGAAGGAAGG         | ACTCCACTGG  | --AGAAGACC | CTAATGCTGG | GAA-----AG | AATTTTGAGG  | GCAAAAAGAAG | 1515 |
| BovB_VA-RTE-Vipera_ammodytes   | GGA-----CTCACTGG   | --AGAAGACC  | CTAATGCTGG | GAA-----AG | ATT-----G  | AGGGCAATAA  | 3053        |      |
| BovB_ACo-RTE-Agkistrodon_conto | GGA-----CTCACTGG   | --AGAAGACC  | CTAATGCTGG | GAA-----AG | ATT-----G  | AGGGCAATAG  | 3052        |      |
| BovB_Pg-RTE-Perameles_gunnii   | GGA-----CT-CATTGG  | --AAAAGACT  | CTGATATTGG | G-----AAAG | ATT-----GA | AAGACAAAAG  | 1240        |      |
| BovB_lo-RTE-Isoodon_obesulus   | GGA-----CT-TAATGG  | GGAAAAAATT  | TTGATGTTGA | GGGAA-AAAG | ATT-----AA | AAGTAAAAGA  | 1706        |      |
| BovB_Bp-RTE-Burramys_parvus    | AGA-----CT-CATTGG  | --AAAAGACC  | CTGATGTTGG | G-----AAAG | ATT-----GA | AGG-CAAAAG  | 1822        |      |
| BovB_Pb-RTE-Petaurus_breviceps | GGA-----CT-CATTGG  | --AAAAGACC  | CTGATGTTAG | G-----AAAG | ATT-----GA | AGG-CAAAAG  | 1828        |      |
| BovB_Ma-RTE-Macropus_antilopin | GGA-----CT-CATTGG  | --AAAAGACC  | CTGATGTTGG | G-----AAAG | ATT-----GA | AGG-CAAAAG  | 3168        |      |
| BovB_Af-RTE-Antechinus_flavipe | GGA-----CTTCACTGG  | --AAAAGACT  | CTGATATTGG | G-----AAAG | ATT-----GA | AGG-AAAAAG  | 2382        |      |
| BovB_Ac-RTE-Anolis_carolinensi | GAAA-----GCTTTGG   | --AAAAGACT  | ATGATGCTGG | GGA-----AA | ATG-----G  | AAGGAAAAAG  | 3031        |      |
| BovB_BM-RTE-Bombyx_mori        | -----ACCGGATA      | G-CCT-AGAA  | ATACTATTCC | TGA---CAG  | ---GGAAGA  | TCGAGGGAAA  | 2860        |      |
| BovB_Dr-RTE-Christinus         | -----CTCTATGG      | A-AAC-AGCT  | TTAATGCTCC | GTG---CAG  | ---TCAGTGA | TCAAGAAGAA  | 2927        |      |
| BovB_La-RTE-Loxodonta_africana | TCA-----GTCCCTGG   | A-GAA-GGAC  | ATCATGCTTG | GCA---AAG  | --TACAGAGT | CAGCGGAAAA  | 3053        |      |
| BovB_Pc-RTE-Procavia_capensis  | TCA-----GTCCCTGG   | A-GAA-GGAC  | ATCATGCTTG | GTA---GAG  | --TGGAGGGT | CAGTGAAAAA  | 3053        |      |
| BovB_Et-RTE-Christinus         | -----              | -----       | -----      | -----      | -----      | -----       | 2573        |      |
| BovB_Ta-RTE-Tachyglossus_acule | TAA-----TTCTCTGG   | A-GAA-GACA  | CTAATGCTAG | GAA---AAG  | --TCCAGGGA | AAACGTGGAA  | 3193        |      |
| BovB_Plat-RTE-Ornithorhynchus  | TAA-----TTCTCTGG   | A-GAA-GACA  | CTAATGCTAG | GAA---AAG  | --TCCAGGGA | AAACGTGGAA  | 3182        |      |
| BovB_Ec-RTE-Equus_caballus     | GGA-----TTCTTTGG   | A-AAA-GACA  | ATAATGCTGG | GAA---AAG  | --TAGAAGGC | AGCAGGAAAA  | 2953        |      |
| BovB_Cg-RTE-Christinus         | AGA-----GTCACTGG   | A-AAAAGACA  | ATAATGCTAG | GAA---AAA  | GTTGAAAGGC | AGCAGGAAAA  | 2492        |      |
| BovB_Bh-RTE-Bothriocroton_hydr | GGGA-----CTCCTTTAG | --AAAAGACT  | TTCATGCTGG | GAA---AG   | ATC-----G  | AAAACAAAAT  | 1501        |      |
| BovB_MI-RTE-Gehyra_variegata   | -----              | -----       | -----      | -----      | -----      | -----       | 1449        |      |
| Sly-rnd1_family284-LINE/RTEBov | -----              | -----       | -----      | -----      | -----      | -----       | 56          |      |
| Sly-rnd5_family2019-LINE/RTEBo | -----              | -----       | -----      | -----      | -----      | -----       | 477         |      |
| Sly-rnd3_family322-LINE/RTEBov | -----              | -----       | -----      | -----      | -----      | -----       | 568         |      |
| Sly-rnd5_family1698-LINE/RTEBo | -----              | -----       | -----      | -----      | -----      | -----       | 231         |      |
| Sly-rnd1_family795-LINE/RTEBov | -----              | -----       | -----      | -----      | -----      | -----       | 538         |      |
| Stu-rnd-5_family-3162_LINE_RTE | -----              | -----       | -----      | -----      | -----      | -----       | 2547        |      |
| Sly-rnd6_family1960-LINE/RTEBo | -----              | -----       | -----      | -----      | -----      | -----       | 1316        |      |
| Stu-rnd-5_family-2493_LINE_RTE | -----              | -----       | -----      | -----      | -----      | -----       | 215         |      |
| Sly-rnd5_family447-LINE/RTEBov | -----              | -----       | -----      | -----      | -----      | -----       | 564         |      |
| Stu-rnd-6_family-2093_LINE_RTE | -----              | -----       | -----      | -----      | -----      | -----       | 105         |      |
| Consensus                      | -----C--T-G        | -----A-GA-- | -T-ATG-T-G | G-----AG   | -----      | -----A-     |             |      |

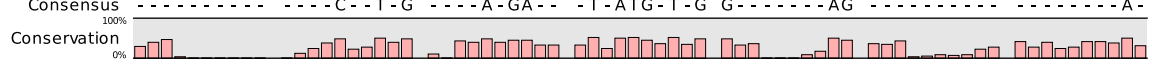

|                                | 4,220      |            | 4,240      |            | 4,260      |            |            |       |       |
|--------------------------------|------------|------------|------------|------------|------------|------------|------------|-------|-------|
| Stu-rnd-1_family-417_LINE_RTE  | -----      | -----      | -----      | -----      | -----      | 306        |            |       |       |
| Sly-rnd1_family377-LINE/RTEBov | -----      | -----      | -----      | -----      | -----      | 135        |            |       |       |
| Stu-rnd-1_family-489_LINE_RTE  | -----      | -----      | -----      | -----      | -----      | 87         |            |       |       |
| Stu-rnd-1_family-607_LINE_RTE  | -----      | -----      | -----      | -----      | -----      | 671        |            |       |       |
| Stu-rnd-1_family-645_LINE_RTE  | -----      | -----      | -----      | -----      | -----      | 437        |            |       |       |
| Sly-rnd4_family81-LINE/RTEBovB | -----      | -----      | -----      | -----      | -----      | 861        |            |       |       |
| Stu-rnd-6_family-408_LINE_RTE  | -----      | -----      | -----      | -----      | -----      | 393        |            |       |       |
| Stu-rnd-1_family-351_LINE_RTE  | -----      | -----      | -----      | -----      | -----      | 609        |            |       |       |
| Stu-rnd-1_family-382_LINE_RTE  | -----      | -----      | -----      | -----      | -----      | 347        |            |       |       |
| Sly-rnd6_family746-LINE/RTEBov | -----      | -----      | -----      | -----      | -----      | 122        |            |       |       |
| Stu-rnd-5_family-325_LINE_RTE  | -----      | -----      | -----      | -----      | -----      | 446        |            |       |       |
| Sly-rnd4_family509-LINE/RTEBov | -----      | -----      | -----      | -----      | -----      | 743        |            |       |       |
| Stu-rnd-1_family-513_LINE_RTE  | -----      | -----      | -----      | -----      | -----      | 65         |            |       |       |
| Sly-rnd5_family1442-LINE/RTEBo | -----      | -----      | -----      | -----      | -----      | 119        |            |       |       |
| BovB_GI-RTE-Gehyra_lazelli     | AAGAAGGGGA | CGACAAAGGA | TGAGATGGTT | AGACAGTGTC | A-----     | TCGAGGCC   | ACA-----   | AA    | 3254  |
| BovB_Gv-RTE-Gehyra_variegata   | AAGAAGGGGA | CGACAAAGGA | TGAGATGGTT | AGACAGTGTC | A-----     | TCGAGGCC   | ACA-----   | AA    | 3181  |
| BovB_PMo-RTE-Python_molurus    | GAGAAGGGGA | CGGCAGAGGA | TGAGATGGTT | AGATAGCATC | A-----     | CTGAAGCA   | ATG-----   | AG    | 3112  |
| BovB_Oa-RTE-Ovis_aries         | GAGAAGGGGA | TGACAGAGGA | TGAGATGGTT | GGATGGCATC | A-----     | CCGACTCA   | ATG-----   | GA    | 3149  |
| BovB-RTE-Bos_taurus            | GAGAAGGGGA | CGACAGAGGA | TGAGATGGCT | GGATGGCATC | A-----     | CTGACTCG   | ATG-----   | GA    | 3737  |
| BovB_Me-RTE-Macropus_eugenii   | -----      | -----      | -----      | -----      | -----      | -----      | -----      | ----- | 2564  |
| BovB_Ano-RTE-Amphibolurus_norr | GAGAAGGGGA | CGACCGAGGA | TGAGATGGCT | AGACAGTGTC | A-----     | TCGAAGCA   | ACC-----   | AA    | 3186  |
| BovB_Gd-RTE-Eremiascincus_doug | GAGAAGGGGG | TGGCAGAGGA | TGAGATGGTT | AGATAGTGTC | A-----     | CCGAAGCA   | ACA-----   | AA    | 2776  |
| BovB_Er-RTE-Eremiascincus_rich | GAGAAGGGGG | CGGCAGAGGA | TGAGATGGTT | AGATAGTGTC | A-----     | CCGAAGCA   | ATG-----   | AA    | 3310  |
| BovB_Ca-RTE-Ctenotus_atlas     | GAGAAGGGGG | CGGCAGAGGA | TGAGATGGTT | AGATAGTGTC | A-----     | CCGAAGCG   | ATG-----   | AA    | 3302  |
| BovB_Es-RTE-Egernia_stokesii   | GAGAAGGGGA | CGGCAGAGGA | TGAGATGGTT | AGATAGTGTC | A-----     | CCGAGGCC   | ATG-----   | AA    | 3137  |
| BovB_Tr-RTE-Tiliqua_rugosa     | GAGAAGGGGA | CAGCAGAGGA | TGAGATGGTT | AGATAGTGTC | A-----     | CAGAGGCC   | ATG-----   | AA    | 3150  |
| BovB_ALi-RTE-Amblyomma_limbatu | AAGGAGGGGA | CAGCATAGGA | TGAAGTGGCT | AGATTGAGTC | A-----     | TAGAAGCA   | GTT-----   | AG    | 3339  |
| BovB_Hs-RTE-Hydrophis_spiralis | AAGAAGGGGA | CGGCAGAGAA | TGAGTGGCT  | GGATGGAGTC | AGTAGGCATG | AGCTGAAGCA | GTCCAATGGG | 1585  |       |
| BovB_VA-RTE-Vipera_ammodytes   | AAGAATGGGA | CGACAGAGAA | TGAGGGTCT  | GGATGGAGTC | A-----     | CTGAAGCA   | GTA-----   | GG    | 3107  |
| BovB_ACo-RTE-Agkistrodon_conto | AAGAAGGGGA | CGACAGAGAA | TGAGTGGCT  | GGATGGAGTC | A-----     | CTGAAGCA   | GTA-----   | GG    | 3106  |
| BovB_Pg-RTE-Perameles_gunnii   | GAAAAGAGGA | TGGCAGAAGA | TGAGATGAAT | AGATAGTAG- | -----      | CATGGAAACA | ATG-----   | AA    | 1295  |
| BovB_lo-RTE-Isoodon_obesulus   | AAAAAAGGA  | TGACAGATCA | TAAGATATAT | AGAAAGT-G- | -----      | CATAGAAACA | ATG-----   | AA    | 1760  |
| BovB_Bp-RTE-Burramys_parvius   | GAGAAGGGGA | TGGCAGAGGA | TGAGATGGAT | AGATAGTGGC | T-----     | CATGGAAACA | ATG-----   | AA    | 1879  |
| BovB_Pb-RTE-Petaurus_breviceps | GAAAAGGGGA | TAGCAGAAGA | TGAGATGGAT | AGATAGTG-  | -----      | CATGGAAACA | ATG-----   | AA    | 1882  |
| BovB_Ma-RTE-Macropus_antilopin | GAAAAGGGGA | TGGCAGAGGA | TGAGATGGAT | AGATAGTG-  | -----      | CATGGAAACA | ATG-----   | AA    | 3222  |
| BovB_Af-RTE-Antechinus_flavipe | TAAAAAGGGA | TGTCAGATAA | TAAAAATAA  | AAAAAGTA-  | -----      | CATAGAAATA | ATA-----   | AA    | 2436  |
| BovB_Ac-RTE-Anolis_carolinensi | GAGAGAGGCG | CGACCAAGGG | CAAGATGGAT | GGA-GGTATC | C-----     | TTGAAGTG   | ACT-----   | GG    | 3084  |
| BovB_BM-RTE-Bombyx_mori        | GAG-       | -----      | -----      | -----      | -----      | -----      | -----      | ----- | 2863  |
| BovB_Dr-RTE-Christinus         | GAGG--GCGT | CAGAGAAC-- | -ACGATGGCT | GGACAA-TAT | C-----     | AAGACGGAC  | TTG-----   | A     | 2975  |
| BovB_La-RTE-Loxodonta_africana | GAGG--AAGA | CCCTCAAA-- | -GAGATGGAT | TGACAC-AGT | G-----     | GCTGCAACA  | ATG-----   | A     | 3101  |
| BovB_Pc-RTE-Procavia_capensis  | GAGG--AAGA | CCCTCGAT-- | -GAGATGGAT | TGACAC-AGT | G-----     | GCTGCAACA  | ATG-----   | G     | 3101  |
| BovB_Et-RTE-Christinus         | -----      | -----      | -----      | -----      | -----      | -----      | -----      | ----- | 2573  |
| BovB-Ta-RTE-Tachyglossus_acule | GAGG--CAGA | CCAGCAGC-- | -TAGATGGAT | AGAGAC-CAT | A-----     | ACAACAATA  | ATG-----   | G     | 3241  |
| BovB_Plat-RTE-Ornithorhynchus  | GAGG--CAGA | CCGGCAGC-- | -TAGATGGAT | AGAGAC-CAT | A-----     | ACAACGATA  | ATG-----   | G     | 3230  |
| BovB_Ec-RTE-Equus_caballus     | GAGG--AAGA | CCAAATAT-- | -GAGATGGAT | TGACTC-CAT | A-----     | AAGGAAGCC  | ATA-----   | G     | 3001  |
| BovB_Cg-RTE-Christinus         | GAGGGAAAGA | CCCAACATCA | TGAGATGGAT | TGACTCGTAT | A-----     | AAGGAAGCC  | ATGAC--    | GG    | 2549  |
| BovB_Bh-RTE-Bothriocroton_hydr | GAGAAACGGT | CGGCAGAGGA | TGAAATGGTT | CGATATTGTC | A-----     | CCGAAGCG   | ACA-----   | A     | 1554  |
| BovB_MI-RTE-Gehyra_variegata   | -----      | -----      | -----      | -----      | -----      | -----      | -----      | ----- | 1449  |
| Sly-rnd1_family284-LINE/RTEBov | -----      | -----      | -----      | -----      | -----      | -----      | -----      | ----- | 56    |
| Sly-rnd5_family2019-LINE/RTEBo | -----      | -----      | -----      | -----      | -----      | -----      | -----      | ----- | 477   |
| Sly-rnd3_family322-LINE/RTEBov | -----      | -----      | -----      | -----      | -----      | -----      | -----      | ----- | 568   |
| Sly-rnd5_family1698-LINE/RTEBo | -----      | -----      | -----      | -----      | -----      | -----      | -----      | ----- | 231   |
| Sly-rnd1_family795-LINE/RTEBov | -----      | -----      | -----      | -----      | -----      | -----      | -----      | ----- | 538   |
| Stu-rnd-5_family-3162_LINE_RTE | -----      | -----      | -----      | -----      | -----      | -----      | -----      | ----- | 2547  |
| Sly-rnd6_family1960-LINE/RTEBo | -----      | -----      | -----      | -----      | -----      | -----      | -----      | ----- | 1316  |
| Stu-rnd-5_family-2493_LINE_RTE | -----      | -----      | -----      | -----      | -----      | -----      | -----      | ----- | 215   |
| Sly-rnd5_family447-LINE/RTEBov | -----      | -----      | -----      | -----      | -----      | -----      | -----      | ----- | 564   |
| Stu-rnd-6_family-2093_LINE_RTE | -----      | -----      | -----      | -----      | -----      | -----      | -----      | ----- | 105   |
| Consensus                      | -A-----G-  | -----A---  | --A--T--T  | -GA-----   | -----      | -----      | -----      | ----- | ----- |

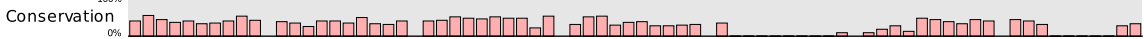

|                                | 4,280            | 4,300             | 4,320            | 4,340         |            |              |              |      |
|--------------------------------|------------------|-------------------|------------------|---------------|------------|--------------|--------------|------|
| Stu-rnd-1_family417_LINE_RTE   | -----            | -----             | -----            | -----         | 306        |              |              |      |
| Sly-rnd1_family377-LINE/RTEBov | -----            | -----             | -----            | -----         | 135        |              |              |      |
| Stu-rnd-1_family489_LINE_RTE   | -----            | -----             | -----            | -----         | 87         |              |              |      |
| Stu-rnd-1_family607_LINE_RTE   | -----            | -----             | -----            | -----         | 671        |              |              |      |
| Stu-rnd-1_family645_LINE_RTE   | -----            | -----             | -----            | -----         | 437        |              |              |      |
| Sly-rnd4_family81-LINE/RTEBovB | -----            | -----             | -----            | -----         | 861        |              |              |      |
| Stu-rnd-6_family408_LINE_RTE   | -----            | -----             | -----            | -----         | 393        |              |              |      |
| Stu-rnd-1_family351_LINE_RTE   | -----            | -----             | -----            | -----         | 609        |              |              |      |
| Stu-rnd-1_family382_LINE_RTE   | -----            | -----             | -----            | -----         | 347        |              |              |      |
| Sly-rnd6_family746-LINE/RTEBov | -----            | -----             | -----            | -----         | 122        |              |              |      |
| Stu-rnd-5_family325_LINE_RTE   | -----            | -----             | -----            | -----         | 446        |              |              |      |
| Sly-rnd4_family509-LINE/RTEBov | -----            | -----             | -----            | -----         | 743        |              |              |      |
| Stu-rnd-1_family513_LINE_RTE   | -----            | -----             | -----            | -----         | 65         |              |              |      |
| Sly-rnd5_family1442-LINE/RTEBo | -----            | -----             | -----            | -----         | 119        |              |              |      |
| BovB_GI-RTE-Gehyra_lazelli     | CA - TGA A A T T | --GAGCGAAC        | TCAG ----G       | AACATGACAG    | AAGACAGGAA | --GGCCT -GGC | GTGGTGTGGT   | 3314 |
| BovB_Gv-RTE-Gehyra_variegata   | CA - TGA A A T T | --GAGCGAAC        | TCAG ----G       | AGCATGACAG    | AAGACAGGAA | --GGCCT -GGC | GTGGTGTGGT   | 3241 |
| BovB_PMo-RTE-Python_molurus    | CA - TGA A A C T | --GAGCAAAC        | TCAG ----G       | GAGGCAGTGA    | AGGACAGGAA | --GGCCT -GGC | GCA - TATGGT | 3171 |
| BovB_Oa-RTE-Ovis_aries         | CA - TGAGT T T   | --GAGCAAAC        | TCCG ----G       | GAGATGGTGA    | AGGACAGGGA | --AGCCT -GGC | GTGCTGCAGT   | 3209 |
| BovB-RTE-Bos_taurus            | CG - TGAGT C T   | --GAGTGAAC        | TCCG ----G       | GAGTTGGTGA    | TGGACAGGGA | --GGCCT -GGC | GTGCTCGCAT   | 3797 |
| BovB_Me-RTE-Macropus_eugenii   | -----            | -----             | -----            | -----         | -----      | -----        | -----        | 2564 |
| BovB_Ano-RTE-Amphibolurus_norr | CA - TGA A T T T | --GACACAAC        | TCCG ----G       | GAGGCAGTGG    | AAGATAGGAG | --GGCCT -GGC | GTGCTCTGGT   | 3246 |
| BovB_Gd-RTE-Eremiascincus_doug | CA - TGA A A T T | --GGGCGAAC        | TCCG ----G       | AAGCTAGTGG    | AGGACAGGGA | --GGCCT -GGC | GTGCTGTGGT   | 2836 |
| BovB_Er-RTE-Eremiascincus_rich | CA - TGA A A T T | --GGGCGAAC        | TCCG ----G       | AAGCTAGTGG    | AGGACAGGGA | --GGCCT -GGC | GTGCTGTGGT   | 3370 |
| BovB_Ca-RTE-Ctenotus_atlas     | CA - TGA A A T T | --GGGCGAAC        | TCCG ----G       | AAGCTAGTGG    | AGGACAGGGA | --GGCCT -GGC | GTGCTGTGGT   | 3362 |
| BovB_Es-RTE-Egernia_stokesii   | CA - TGA A T T T | --GGACAAAAC       | TCCA ----G       | AAGTTAGTGG    | TAGACAGGGG | --GGCCT -GGC | GTGCTGTGGT   | 3197 |
| BovB_Tr-RTE-Tiliqua_rugosa     | CA - TGA A T T T | --GGACAAAAC       | TCTG ----G       | AAGTTAGTGG    | TAGACAGGGG | --GGCCT -GGC | ATGCTGTGGT   | 3210 |
| BovB_ALI-RTE-Amblyomma_limbatu | TG - CGAGC C T   | --AAGTGTAAC       | ATCT ----G       | GAAATAGTGG    | AAGACAGGAA | --GGCCTGGGA  | GGAGTGTGTT   | 3400 |
| BovB_Hs-RTE-Hydrophis_spiralis | CA - TGAGC T T   | <b>TCAAATGGAA</b> | <b>AACTCTCCA</b> | AAGATGGTAG    | AGGACAGGAA | --GGCCTTGA   | GGAACATTGT   | 1653 |
| BovB_VA-RTE-Vipera_ammodytes   | CG - TGAGC T T   | --AAATGGCC        | TCCA ----G       | AAGATGGTAG    | AGGACAGGAA | --GGCCT -GGA | GGAACATTGT   | 3167 |
| BovB_ACo-RTE-Agkistrodon_conto | CG - TGAGC T T   | --AAATGGAC        | TCCA ----G       | AAGATGGTAG    | AGGACAGGAA | --GGCCT -GGA | GGAACGTTGT   | 3166 |
| BovB_Pg-RTE-Perameles_gunnii   | CA A TGA A C T T | --GGACAGAC        | TTTG ----G       | AAGATGGAGG    | AGGATAGAA  | --GGACCTGAC  | ATGCTATATT   | 1357 |
| BovB_lo-RTE-Isoodon_obesulus   | CA - TGA A A T T | --AAACAG - T      | CTTA ----A       | GATATAATAG    | AATATAAAA  | --AAACCAGG - | ATGCTATAAT   | 1819 |
| BovB_Bp-RTE-Burramys_parvulus  | CA - TGA A C T T | --GGACAGAC        | TTTG ----A       | GAGATAGTGG    | AGGATAGAA  | --GGACTTGGT  | GTACTAAGGT   | 1940 |
| BovB_Pb-RTE-Petaurus_breviceps | CA - TGA A C T T | --GGACAGAC        | TT -GG ----A     | GACATAGTGG    | AGGACAGAA  | --GGGTCTGGC  | ATGCCATGGT   | 1942 |
| BovB_Ma-RTE-Macropus_antilopin | CA - TGA A C T T | --GGACAGAC        | TTTG ----A       | GAGACAGTGG    | AAGATAGAAA | AGGGGCAGGC   | ATGCTGTGGT   | 3284 |
| BovB_Af-RTE-Antechinus_flavipe | AA - TGAGC T T   | --GTACATAC        | TTTA ----A       | GATACACTAG    | AGGATAAAA  | --GAATCTAAT  | AATTTAAGGA   | 2496 |
| BovB_Ac-RTE-Anolis_carolinensi | CT - TGA C C T T | --GAAGGAAC        | TGGG ----G       | CGGGTGAACG    | CCGACAGGGA | --GCTCTGGC   | GTGGACTGGT   | 3144 |
| BovB_BM-RTE-Bombyx_mori        | -----            | -----             | -----            | -----         | -----      | -----        | -----        | 2863 |
| BovB_Dr-RTE-Christinus         | ACT TGA A C A T  | --GGAACAAC        | TGAA ----A       | GAAGCGGTCA    | GAAATAGGAA | --AGCATGGC   | AAATCATGAT   | 3036 |
| BovB_La-RTE-Loxodonta_africana | GCT CA A G C A T | --AAACAACGA       | TTGT ----A       | AGCATGGCAC    | AGGACCAGGC | --AGTGTTC    | ATTCTGTTGT   | 3162 |
| BovB_Pc-RTE-Procavia_capensis  | GCT TA A G C A T | --AAAAACGA        | TTGT ----G       | GACATGGCAC    | AAGACTGGGC | --AGTGTTC    | ATTCTGTTGT   | 3162 |
| BovB_Et-RTE-Christinus         | -----            | -----             | -----            | -----         | -----      | -----        | -----        | 2573 |
| BovB_Ta-RTE-Tachyglossus_acule | AAGAACCATT       | --AGAAAGGT        | TGCC ----G       | ATTATGGCAG    | AGGACAGGAC | --GTTCTGGA   | GAAAATATAT   | 3302 |
| BovB_Plat-RTE-Ornithorhynchus  | AAGAACCATT       | --AGAAAGGT        | TGCC ----G       | ATTATGGCAG    | AGGACAGGAC | --GTTCTGGA   | GAAAATATAT   | 3291 |
| BovB_Ec-RTE-Equus_caballus     | GCA TGA G T C T  | --ACAGAAGC        | TGAG ----T       | AGGGCTGTTG    | AGGACAGGAC | --ATTGTGGA   | CATCACTCAT   | 3062 |
| BovB_Cg-RTE-Christinus         | CCCTCAGTTT       | --GCAAGACC        | TGAG ----C       | AAGGCTGTTA    | ACAATAGGAT | --GTTTTGGA   | GGACATTAAT   | 2610 |
| BovB_Bh-RTE-Bothriocroton_hydr | ACGTGAAATT       | --GGGCGAAC        | TCTC ----G       | AATCTAGTGA    | AGGACAGAGA | --GGCCT -GC  | GTGCTGTGGC   | 1614 |
| BovB_MI-RTE-Gehyra_variegata   | -----            | -----             | -----            | -----         | -----      | -----        | -----        | 1449 |
| Sly-rnd1_family284-LINE/RTEBov | -----            | -----             | -----            | -----         | -----      | -----        | -----        | 56   |
| Sly-rnd5_family2019-LINE/RTEBo | -----            | -----             | -----            | -----         | -----      | -----        | -----        | 477  |
| Sly-rnd3_family322-LINE/RTEBov | -----            | -----             | -----            | -----         | -----      | -----        | -----        | 568  |
| Sly-rnd5_family1698-LINE/RTEBo | -----            | -----             | -----            | -----         | -----      | -----        | -----        | 231  |
| Sly-rnd1_family795-LINE/RTEBov | -----            | -----             | -----            | -----         | -----      | -----        | -----        | 538  |
| Stu-rnd-5_family3162_LINE_RTE  | -----            | -----             | -----            | -----         | -----      | -----        | -----        | 2547 |
| Sly-rnd6_family1960-LINE/RTEBo | -----            | -----             | -----            | -----         | -----      | -----        | -----        | 1316 |
| Stu-rnd-5_family2493_LINE_RTE  | -----            | -----             | -----            | -----         | -----      | -----        | -----        | 215  |
| Sly-rnd5_family447-LINE/RTEBov | -----            | -----             | -----            | -----         | -----      | -----        | -----        | 564  |
| Stu-rnd-6_family2093_LINE_RTE  | -----            | -----             | -----            | -----         | -----      | -----        | -----        | 105  |
| Consensus                      | -----A-----T     | -----             | -----            | -----A-A----- | -----      | -----        | -----T       |      |

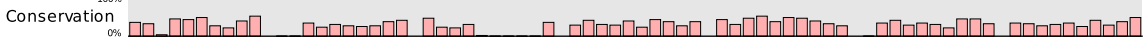



|                                | 4,360       |            | 4,380      |            | 4,400       |                |             |      |
|--------------------------------|-------------|------------|------------|------------|-------------|----------------|-------------|------|
| Stu-rnd-1_family-417_LINE_RTE  | -----       | -----      | -----      | -----      | -----       | 306            |             |      |
| Sly-rnd1_family377-LINE/RTEBov | -----       | -----      | -----      | -----      | -----       | 135            |             |      |
| Stu-rnd-1_family-489_LINE_RTE  | -----       | -----      | -----      | -----      | -----       | 87             |             |      |
| Stu-rnd-1_family-607_LINE_RTE  | -----       | -----      | -----      | -----      | -----       | 671            |             |      |
| Stu-rnd-1_family-645_LINE_RTE  | -----       | -----      | -----      | -----      | -----       | 437            |             |      |
| Sly-rnd4_family81-LINE/RTEBovB | -----       | -----      | -----      | -----      | -----       | 861            |             |      |
| Stu-rnd-6_family-408_LINE_RTE  | -----       | -----      | -----      | -----      | -----       | 393            |             |      |
| Stu-rnd-1_family-351_LINE_RTE  | -----       | -----      | -----      | -----      | -----       | 609            |             |      |
| Stu-rnd-1_family-382_LINE_RTE  | -----       | -----      | -----      | -----      | -----       | 347            |             |      |
| Sly-rnd6_family746-LINE/RTEBov | -----       | -----      | -----      | -----      | -----       | 122            |             |      |
| Stu-rnd-5_family-325_LINE_RTE  | -----       | -----      | -----      | -----      | -----       | 446            |             |      |
| Sly-rnd4_family509-LINE/RTEBov | -----       | -----      | -----      | -----      | -----       | 743            |             |      |
| Stu-rnd-1_family-513_LINE_RTE  | -----       | -----      | -----      | -----      | -----       | 65             |             |      |
| Sly-rnd5_family1442-LINE/RTEBo | -----       | -----      | -----      | -----      | -----       | 119            |             |      |
| BovB_GI-RTE-Gehyra_lazelli     | CCATGGGGTC  | GCAAAGAGTC | --GGAGCCGA | CTGT--GCGA | CTGAACAACA  | ACAACAAAA--ACA | ACTAACA     | 3379 |
| BovB_Gv-RTE-Gehyra_variegata   | CCATGGGGTC  | GCAAAGAGTC | --GGAGCCGA | CTGT--GCGA | CTGAACAACA  | ACAACAGCTC     | ATGATCTGAG  | 3307 |
| BovB_PMo-RTE-Python_molurus    | TCATGGGGTC  | ACGAAGAGTC | --GGACACGA | CTTA--ACGA | CTGAACAACA  | ACAACAATT--    | CTATTCTATT  | 3236 |
| BovB_Oa-RTE-Ovis_aries         | CCATGGGGTC  | ACAAAGAGTC | --AGACATGA | CTGA--GCGA | CTGAACAACA  | ACAA-----      | -----       | 3259 |
| BovB-RTE-Bos_taurus            | TCATGGGGTC  | GCAAAGAGTC | --GGACACGA | CTGA--GCGA | CTGAAGTAA   | CTGA-----      | -----       | 3847 |
| BovB_Me-RTE-Macropus_eugenii   | -----       | -----      | -----      | -----      | -----       | -----          | -----       | 2564 |
| BovB_Ano-RTE-Amphibolurus_norr | CCATGGGGTC  | ACGAAGAGTC | --GGACACGA | CTAA--ACGA | CTAAACGAAC  | GACGATGAAA     | AAA-----    | 3305 |
| BovB_Gd-RTE-Eremiascincus_doug | CCATGGGGTC  | GCGAAGAGTC | --GGACACGA | CTTA--GCGA | CTGAACAACA  | ACAATTA        | GCAGCAGCCT  | 2902 |
| BovB_Er-RTE-Eremiascincus_rich | CCATGGGGTC  | GCGAAGAGTC | --GGACACGA | CTTA--GCGA | CTGAACAACA  | ACAACAATTA     | TTAAAGATTA  | 3436 |
| BovB_Ca-RTE-Ctenotus_atlas     | CCATGGGGTC  | GCGAAGAGTC | --GGACACGA | CTTA--GCGA | CTGAACAACA  | ACAACAACA      | A-----      | 3419 |
| BovB_Es-RTE-Egernia_stokesii   | CCATGGGGTC  | ACGAAGAGTC | --GGACATGA | CTTA--ACGA | CTGAACAACA  | ACAAAAACA      | CAAACTGCA   | 3263 |
| BovB_Tr-RTE-Tiliqua_rugosa     | CCATGGGGTC  | ACAAAGAGTC | --GGACATGA | CTTA--ACGA | CTGAACAACA  | ACAA-----      | -----       | 3260 |
| BovB_ALi-RTE-Amblyomma_limbatu | CCATGGGGTC  | GCGATGGGTC | --GGACATGA | CTTT--GCGA | CT--AACAACA | ATCAGTAAAA     | AAAAAAGCA   | 3466 |
| BovB_Hs-RTE-Hydrophis_spiralis | CCATGGGGTC  | ATGATGGGTC | --AGACACGA | CTTT--GCAA | CT--AACAACA | AC-----AA      | CAAGTAAATA  | 1712 |
| BovB_VA-RTE-Vipera_ammodytes   | CCATAGGGTC  | GCGATGGGTC | --GGACACGA | CTTC--GCGA | CT--AACAACA | AC-----AA      | CAATTCTATT  | 3226 |
| BovB_ACo-RTE-Agkistrodon_conto | CCATGGGGTC  | GCGATGGGTC | --GGACACGA | CTTC--GCAA | CT--AACAACA | AC-----AA      | CAATTCTATT  | 3225 |
| BovB_Pg-RTE-Perameles_gunnii   | GCAAAA----- | -GGAAACAAA | --AAACTTAA | TTAA--ACAC | CAACAAAAAT  | ATACCATAGA     | TAAATAATAT  | 1417 |
| BovB_lo-RTE-Isoodon_obesulus   | TCAAAAAGTC  | AGGAAAAGTC | --AGACATGA | CTGA--ATGA | CTGAATAACA  | ATCTCAT---     | TCAATAGTAA  | 1882 |
| BovB_Bp-RTE-Burramys_parvulus  | CCATGGGATC  | ATGAAAAGTC | --AGGAATGA | --AA--AAAA | CAAAAAAAA   | AAGAAATTA--    | TGATACTCA   | 2001 |
| BovB_Pb-RTE-Petaurus_breviceps | CCATGGGACTC | ACAAAGACTG | --AGACGTGG | CTAA--ATGA | CTCAACAACA  | ACTAGTTA--     | AAATAATAG   | 2005 |
| BovB_Ma-RTE-Macropus_antilopin | CCATGGGGTC  | ACAAAGAGTT | --GAACATAA | CGAA--AAAA | AACAACAACA  | ACAACAAA--     | ACGTATAGC   | 3347 |
| BovB_Af-RTE-Antechinus_flavipe | CCAGAAAGGC  | CAAAAAAGGA | --AAAAAA-- | --AA--ATAA | CTGAACAACA  | ACAACAAT--     | AAGCAGAAA   | 2555 |
| BovB_Ac-RTE-Anolis_carolinensi | CCATGAGGTC  | ACGAAGAGTC | --GGAAACGA | CTAA--ACGA | -----       | -----          | -----       | 3180 |
| BovB_BM-RTE-Bombyx_mori        | -----       | -----      | -----      | -----      | -----       | -----          | -----       | 2863 |
| BovB_Dr-RTE-Christinus         | CCATAAAGTG  | GCGGAAAGTC | --GGTGTGCA | CTGATTGGCT | AATCATCATC  | ATAAT-----     | -----       | 3089 |
| BovB_La-RTE-Loxodonta_africana | ACATAGGGCC  | ACTATGAGTC | --AGAACCGA | CTCGACGGCA | CCTAACAACA  | A-----         | -----       | 3211 |
| BovB_Pc-RTE-Procavia_capensis  | TCATAGGGTC  | GCTATGAGTC | --AGAACCGA | CTCAATGGCA | CCTAACAACA  | ACAACAACCTC    | T-----      | 3221 |
| BovB_Et-RTE-Christinus         | -----       | -----      | -----      | -----      | -----       | -----          | -----       | 2573 |
| BovB-Ta-RTE-Tachyglossus_acule | CCATAGAGTC  | GCTATGAATC | --GGAATGA  | CTCGATGGCA | CTTGATAATA  | ATAATAATAA     | TAACACTAAT  | 3370 |
| BovB_Plat-RTE-Ornithorhynchus  | CCATGGGATC  | GCTATGAATC | --GGAACGA  | CTCGACGGCA | CTTAATAATA  | ATAATAATAA     | -----       | 3349 |
| BovB_Ec-RTE-Equus_caballus     | TCATAGGGTC  | ACCAGGATC  | --AGAGCTGA | CTTGACGGCA | TGTAACA-AC  | AA-----        | -----       | 3111 |
| BovB_Cg-RTE-Christinus         | TCATAGGGTT  | ACCAATAATC | CAGGAAGCAA | CTTGATGGCA | CTTAACACAC  | ACACAATAG      | GCAAAATATGA | 2680 |
| BovB_Bh-RTE-Bothriocroton_hydr | CCATGAGGTC  | GCGAAGGTC  | --GGACACGA | ATTA--GCGA | ATGGACAACA  | ACATATTGAT     | ATCCGGCTTA  | 1680 |
| BovB_MI-RTE-Gehyra_variegata   | -----       | -----      | -----      | -----      | -----       | -----          | -----       | 1449 |
| Sly-rnd1_family284-LINE/RTEBov | -----       | -----      | -----      | -----      | -----       | -----          | -----       | 56   |
| Sly-rnd5_family2019-LINE/RTEBo | -----       | -----      | -----      | -----      | -----       | -----          | -----       | 477  |
| Sly-rnd3_family322-LINE/RTEBov | -----       | -----      | -----      | -----      | -----       | -----          | -----       | 568  |
| Sly-rnd5_family1698-LINE/RTEBo | -----       | -----      | -----      | -----      | -----       | -----          | -----       | 231  |
| Sly-rnd1_family795-LINE/RTEBov | -----       | -----      | -----      | -----      | -----       | -----          | -----       | 538  |
| Stu-rnd-5_family-3162_LINE_RTE | -----       | -----      | -----      | -----      | -----       | -----          | -----       | 2547 |
| Sly-rnd6_family1960-LINE/RTEBo | -----       | -----      | -----      | -----      | -----       | -----          | -----       | 1316 |
| Stu-rnd-5_family-2493_LINE_RTE | -----       | -----      | -----      | -----      | -----       | -----          | -----       | 215  |
| Sly-rnd5_family447-LINE/RTEBov | -----       | -----      | -----      | -----      | -----       | -----          | -----       | 564  |
| Stu-rnd-6_family-2093_LINE_RTE | -----       | -----      | -----      | -----      | -----       | -----          | -----       | 105  |

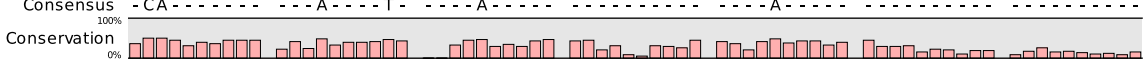



|                                | 4,420       | 4,440       | 4,460      | 4,480      |            |            |            |      |
|--------------------------------|-------------|-------------|------------|------------|------------|------------|------------|------|
| Stu-rnd-1_family-417_LINE_RTE  | -----       | -----       | -----      | -----      | 306        |            |            |      |
| Sly-rnd1_family377-LINE/RTEBov | -----       | -----       | -----      | -----      | 135        |            |            |      |
| Stu-rnd-1_family-489_LINE_RTE  | -----       | -----       | -----      | -----      | 87         |            |            |      |
| Stu-rnd-1_family-607_LINE_RTE  | -----       | -----       | -----      | -----      | 671        |            |            |      |
| Stu-rnd-1_family-645_LINE_RTE  | -----       | -----       | -----      | -----      | 437        |            |            |      |
| Sly-rnd4_family81-LINE/RTEBovB | -----       | -----       | -----      | -----      | 861        |            |            |      |
| Stu-rnd-6_family-408_LINE_RTE  | -----       | -----       | -----      | -----      | 393        |            |            |      |
| Stu-rnd-1_family-351_LINE_RTE  | -----       | -----       | -----      | -----      | 609        |            |            |      |
| Stu-rnd-1_family-382_LINE_RTE  | -----       | -----       | -----      | -----      | 347        |            |            |      |
| Sly-rnd6_family746-LINE/RTEBov | -----       | -----       | -----      | -----      | 122        |            |            |      |
| Stu-rnd-5_family-325_LINE_RTE  | -----       | -----       | -----      | -----      | 446        |            |            |      |
| Sly-rnd4_family509-LINE/RTEBov | -----       | -----       | -----      | -----      | 743        |            |            |      |
| Stu-rnd-1_family-513_LINE_RTE  | -----       | -----       | -----      | -----      | 65         |            |            |      |
| Sly-rnd5_family1442-LINE/RTEBo | -----       | -----       | -----      | -----      | 119        |            |            |      |
| BovB_GI-RTE-Gehyra_lazelli     | CTGCCGCATA  | TCAACAATCC  | ATGGCCATA  | AAATTTATAC | AAAAAAA-AA | TCAAATACT  | CTAATACAAT | 3448 |
| BovB_Gv-RTE-Gehyra_variegata   | CCACAGT-CA  | GCTCCAGGTC  | TTGTTTTACT | GACTGTATAC | AGTATCACAA | TCTACAGACA | GTCACCAAAT | 3376 |
| BovB_PMo-RTE-Python_molurus    | CTGTTCTATT  | CTATTCTATT  | CTATTCTATT | CTAT-TCTGT | TCTGTTCTGT | TCT-----   | -----      | 3288 |
| BovB_Oa-RTE-Ovis_aries         | -----       | -----       | -----      | -----      | -----      | -----      | -----      | 3259 |
| BovB-RTE-Bos_taurus            | -----       | -----       | -----      | -----      | -----      | -----      | -----      | 3847 |
| BovB_Me-RTE-Macropus_eugenii   | -----       | -----       | -----      | -----      | -----      | -----      | -----      | 2564 |
| BovB_Ano-RTE-Amphibolurus_norr | -----       | -----       | -----      | -----      | -----      | -----      | -----      | 3305 |
| BovB_Gd-RTE-Eremiascincus_doug | GCCAA-----  | -----CAACAA | TGTACAATTT | ACG-TTGAAA | TACAGCATAT | AAATACTATT | AACTG----- | 2957 |
| BovB_Er-RTE-Eremiascincus_rich | AACAAATAAT  | AATATGAAAA  | TGTAAAAAT  | CTAATTAACA | TTTCACTTGT | AACCCTAGTC | AATCCTAAAA | 3506 |
| BovB_Ca-RTE-Ctenotus_atlas     | -----       | -----       | -----      | -----      | -----      | -----      | -----      | 3419 |
| BovB_Es-RTE-Egernia_stokesii   | AAAAAAATAA  | TTCAAAATAAC | AACAGAGAA- | -----      | -----      | -----      | -----      | 3292 |
| BovB_Tr-RTE-Tiliqua_rugosa     | -----       | -----       | -----      | -----      | -----      | -----      | -----      | 3260 |
| BovB_ALi-RTE-Amblyomma_limbatu | ATAAAAAAAT  | AAATTTAATT  | ATCAATATTT | ACTTCATATC | AAATTTACTT | ATAT--GACT | ATATTTCAAA | 3534 |
| BovB_Hs-RTE-Hydrophis_spiralis | CAAAGAAAAAT | AA-CCCAACA  | ATTA-TATTA | AATTGCAATT | ATTTACATCA | ATACCAAAT  | AAACAAAGAA | 1780 |
| BovB_VA-RTE-Vipera_ammodytes   | CTATTTCTATT | CTATTCTATA  | TTCTGTCTCT | GTTCTATATT | CTATTCTATT | CTATTCT--  | -----      | 3283 |
| BovB_ACo-RTE-Agkistrodon_conto | CTATTCTATT  | CTATTCTATT  | CTATTCTATT | CTATTCTATT | CTATTCTATT | CTATTCT--  | -----      | 3282 |
| BovB_Pg-RTE-Perameles_gunnii   | AAT-TAATTT  | CAAATAAATT  | CT--TCATTT | AGAGAATGGT | CATTGAAAGA | GATTTCCAG  | GAAACAGTGT | 1484 |
| BovB_lo-RTE-Isoodon_obesulus   | AAT-ATTATT  | CAATTAATTT  | CAAATAAACT | ATATTATCCT | TGCCTGTACA | TATTTTCCAA | -----      | 1941 |
| BovB_Bp-RTE-Burramys_parvulus  | AAA-TCAATA  | TTTTTATTTT  | TTAGAAAACT | ATTTAACATA | AGGCAAAATC | TGCTGAACAC | AGAAAAAT-- | 2067 |
| BovB_Pb-RTE-Petaurus_breviceps | AAA--AGTG   | GACCAG----  | --AGGAAAAG | GAAGGAAGCA | AGGCAGGAAG | GTATGAAGAA | AGAAACCTGT | 2066 |
| BovB_Ma-RTE-Macropus_antilopin | ACT-ACGCTA  | CAGTGGGACT  | GT-GCTGGCT | TTAGTATCTA | AAAGACCT-- | -----      | -----      | 3393 |
| BovB_Af-RTE-Antechinus_flavipe | ACTCTCAAGG  | GATATACATT  | C-----     | -----      | -----      | -----      | -----      | 2576 |
| BovB_Ac-RTE-Anolis_carolinensi | -----       | -----       | -----      | -----      | -----      | -----      | -----      | 3180 |
| BovB_BM-RTE-Bombyx_mori        | -----       | -----       | -----      | -----      | -----      | -----      | -----      | 2863 |
| BovB_Dr-RTE-Christinus         | -----       | -----       | -----      | -----      | -----      | -----      | -----      | 3089 |
| BovB_La-RTE-Loxodonta_africana | -----       | -----       | -----      | -----      | -----      | -----      | -----      | 3211 |
| BovB_Pc-RTE-Procavia_capensis  | -----       | -----       | -----      | -----      | -----      | -----      | -----      | 3221 |
| BovB_Et-RTE-Christinus         | -----       | -----       | -----      | -----      | -----      | -----      | -----      | 2573 |
| BovB-Ta-RTE-Tachyglossus_acule | TGGAACACTG  | TGTG-----   | -----      | -----      | -----      | -----      | -----      | 3384 |
| BovB_Plat-RTE-Ornithorhynchus  | -----       | -----       | -----      | -----      | -----      | -----      | -----      | 3349 |
| BovB_Ec-RTE-Equus_caballus     | -----       | -----       | -----      | -----      | -----      | -----      | -----      | 3111 |
| BovB_Cg-RTE-Christinus         | TACATAAAAA  | TTTCCCTCTG  | TCTGFACTCT | TCTCCCTGAA | AACAACCTGT | CTCTAGCTGA | TTCCCTCCC  | 2750 |
| BovB_Bh-RTE-Bothriocroton_hydr | TCTTACCAGT  | ACTTACCTA-  | -----      | -----      | -----      | -----      | -----      | 1699 |
| BovB_MI-RTE-Gehyra_variegata   | -----       | -----       | -----      | -----      | -----      | -----      | -----      | 1449 |
| Sly-rnd1_family284-LINE/RTEBov | -----       | -----       | -----      | -----      | -----      | -----      | -----      | 56   |
| Sly-rnd5_family2019-LINE/RTEBo | -----       | -----       | -----      | -----      | -----      | -----      | -----      | 477  |
| Sly-rnd3_family322-LINE/RTEBov | -----       | -----       | -----      | -----      | -----      | -----      | -----      | 568  |
| Sly-rnd5_family1698-LINE/RTEBo | -----       | -----       | -----      | -----      | -----      | -----      | -----      | 231  |
| Sly-rnd1_family795-LINE/RTEBov | -----       | -----       | -----      | -----      | -----      | -----      | -----      | 538  |
| Stu-rnd-5_family-3162_LINE_RTE | -----       | -----       | -----      | -----      | -----      | -----      | -----      | 2547 |
| Sly-rnd6_family1960-LINE/RTEBo | -----       | -----       | -----      | -----      | -----      | -----      | -----      | 1316 |
| Stu-rnd-5_family-2493_LINE_RTE | -----       | -----       | -----      | -----      | -----      | -----      | -----      | 215  |
| Sly-rnd5_family447-LINE/RTEBov | -----       | -----       | -----      | -----      | -----      | -----      | -----      | 564  |
| Stu-rnd-6_family-2093_LINE_RTE | -----       | -----       | -----      | -----      | -----      | -----      | -----      | 105  |
| Consensus                      | -----       | -----       | -----      | -----      | -----      | -----      | -----      |      |
| Conservation                   |             |             |            |            |            |            |            |      |

|                                | 4,500      | 4,520      | 4,540      |            |            |            |            |            |            |      |
|--------------------------------|------------|------------|------------|------------|------------|------------|------------|------------|------------|------|
| Stu-rnd-1_family-417_LINE_RTE  |            |            |            | 306        |            |            |            |            |            |      |
| Sly-rnd1_family377-LINE/RTEBov |            |            |            | 135        |            |            |            |            |            |      |
| Stu-rnd-1_family-489_LINE_RTE  |            |            |            | 87         |            |            |            |            |            |      |
| Stu-rnd-1_family-607_LINE_RTE  |            |            |            | 671        |            |            |            |            |            |      |
| Stu-rnd-1_family-645_LINE_RTE  |            |            |            | 437        |            |            |            |            |            |      |
| Sly-rnd4_family81-LINE/RTEBovB |            |            |            | 861        |            |            |            |            |            |      |
| Stu-rnd-6_family-408_LINE_RTE  |            |            |            | 393        |            |            |            |            |            |      |
| Stu-rnd-1_family-351_LINE_RTE  |            |            |            | 609        |            |            |            |            |            |      |
| Stu-rnd-1_family-382_LINE_RTE  |            |            |            | 347        |            |            |            |            |            |      |
| Sly-rnd6_family746-LINE/RTEBov |            |            |            | 122        |            |            |            |            |            |      |
| Stu-rnd-5_family-325_LINE_RTE  |            |            |            | 446        |            |            |            |            |            |      |
| Sly-rnd4_family509-LINE/RTEBov |            |            |            | 743        |            |            |            |            |            |      |
| Stu-rnd-1_family-513_LINE_RTE  |            |            |            | 65         |            |            |            |            |            |      |
| Sly-rnd5_family1442-LINE/RTEBo |            |            |            | 119        |            |            |            |            |            |      |
| BovB_GI-RTE-Gehyra_lazelli     | ATA        | TGGCTAAGAA | AAAGAAAGAT | CTACACACAT | GT-CTCCTGC | TCTAAAAAAA | CAA        | 3504       |            |      |
| BovB_Gv-RTE-Gehyra_variegata   | GATGTAGACA | TTCCCATTAC | AGACTAGACC | CCTTAATAAT | GTA        | CTTTTGA    | AGAGCGGCAG | CAAAGTTAG  | 3446       |      |
| BovB_PMo-RTE-Python_molurus    |            |            |            |            |            |            |            |            | 3288       |      |
| BovB_Oa-RTE-Ovis_aries         |            |            |            |            |            |            |            |            | 3259       |      |
| BovB-RTE-Bos_taurus            |            |            |            |            |            |            |            |            | 3847       |      |
| BovB_Me-RTE-Macropus_eugenii   |            |            |            |            |            |            |            |            | 2564       |      |
| BovB_Ano-RTE-Amphibolurus_norr |            |            |            |            |            |            |            |            | 3305       |      |
| BovB_Gd-RTE-Eremiascincus_doug | ATTGACTT   | TTTTAAAAAA | GGAACAGACT | TTCCCCCA   | A          | ACACAAAACC | TCCAG      | C          | GTCCCAGCTC | 3021 |
| BovB_Er-RTE-Eremiascincus_rich | ATATTGCCAA | AGTGAAAAAA | GAAGCATATA | TATTTTCAGA | ACACCTA    | ATAATAGACC | TATCAAACAC |            |            | 3576 |
| BovB_Ca-RTE-Ctenotus_atlas     |            |            |            |            |            |            |            |            |            | 3419 |
| BovB_Es-RTE-Egernia_stokesii   |            |            |            |            |            |            |            |            |            | 3292 |
| BovB_Tr-RTE-Tiliqua_rugosa     |            |            |            |            |            |            |            |            |            | 3260 |
| BovB_ALi-RTE-Amblyomma_limbatu | ATATTACAAA | CAGTAGTATC | GAAATATATA | TTGTAGAAAC | CATGAGCATT | AAACAAGTAT | ACTATTGATT |            |            | 3604 |
| BovB_Hs-RTE-Hydrophis_spiralis | GTA        | CTN-AAA    | AGATAATATA | CTAAAGCATA | TTCTTGAAAT | GATTA      | AAAGCA     | AAATTGCTAA | GACCGTTATT | 1849 |
| BovB_VA-RTE-Vipera_ammodytes   |            |            |            |            |            |            |            |            |            | 3283 |
| BovB_ACo-RTE-Agkistrodon_conto |            |            |            |            |            |            |            |            |            | 3282 |
| BovB_Pg-RTE-Perameles_gunnii   | ACTTGGAAC  | TGGAATAATT | GGGTTGATGT | TGTGGACACT | GATTGTGGCA | AGAAA      | ACTTC      | TGATCTAGAA |            | 1583 |
| BovB_lo-RTE-Isodon_obesulus    |            |            |            |            |            |            |            |            |            | 1941 |
| BovB_Bp-RTE-Burramys_parvulus  |            |            |            |            |            |            |            |            |            | 2067 |
| BovB_Pb-RTE-Petaurus_breviceps | CTATAACTTA | TTAGATCATC | TTTTTAAAGT | TGCTGTGACA | AAAA       |            |            |            |            | 2110 |
| BovB_Ma-RTE-Macropus_antilopin |            |            |            |            |            |            |            |            |            | 3393 |
| BovB_Af-RTE-Antechinus_flavipe |            |            |            |            |            |            |            |            |            | 2576 |
| BovB_Ac-RTE-Anolis_carolinensi |            |            |            |            |            |            |            |            |            | 3180 |
| BovB_BM-RTE-Bombyx_mori        |            |            |            |            |            |            |            |            |            | 2863 |
| BovB_Dr-RTE-Christinus         |            |            |            |            |            |            |            |            |            | 3089 |
| BovB_La-RTE-Loxodonta_africana |            |            |            |            |            |            |            |            |            | 3211 |
| BovB_Pc-RTE-Procavia_capensis  |            |            |            |            |            |            |            |            |            | 3221 |
| BovB_Et-RTE-Christinus         |            |            |            |            |            |            |            |            |            | 2573 |
| BovB_Ta-RTE-Tachyglossus_acule |            |            |            |            |            |            |            |            |            | 3384 |
| BovB_Plat-RTE-Ornithorhynchus  |            |            |            |            |            |            |            |            |            | 3349 |
| BovB_Ec-RTE-Equus_caballus     |            |            |            |            |            |            |            |            |            | 3111 |
| BovB_Cg-RTE-Christinus         | CCCCCCCCAT | TAGTGAATT  | CCATTG     |            |            |            |            |            |            | 2776 |
| BovB_Bh-RTE-Bothriocroton_hydr |            |            |            |            |            |            |            |            |            | 1699 |
| BovB_MI-RTE-Gehyra_variegata   |            |            |            |            |            |            |            |            |            | 1449 |
| Sly-rnd1_family284-LINE/RTEBov |            |            |            |            |            |            |            |            |            | 56   |
| Sly-rnd5_family2019-LINE/RTEBo |            |            |            |            |            |            |            |            |            | 477  |
| Sly-rnd3_family322-LINE/RTEBov |            |            |            |            |            |            |            |            |            | 568  |
| Sly-rnd5_family1698-LINE/RTEBo |            |            |            |            |            |            |            |            |            | 231  |
| Sly-rnd1_family795-LINE/RTEBov |            |            |            |            |            |            |            |            |            | 538  |
| Stu-rnd-5_family-3162_LINE_RTE |            |            |            |            |            |            |            |            |            | 2547 |
| Sly-rnd6_family1960-LINE/RTEBo |            |            |            |            |            |            |            |            |            | 1316 |
| Stu-rnd-5_family-2493_LINE_RTE |            |            |            |            |            |            |            |            |            | 215  |
| Sly-rnd5_family447-LINE/RTEBov |            |            |            |            |            |            |            |            |            | 564  |
| Stu-rnd-6_family-2093_LINE_RTE |            |            |            |            |            |            |            |            |            | 105  |
| Consensus                      |            |            |            |            |            |            |            |            |            |      |
| Conservation                   |            |            |            |            |            |            |            |            |            |      |

|                                | 4,560      | 4,580      | 4,600      | 4,620      |            |            |            |      |  |
|--------------------------------|------------|------------|------------|------------|------------|------------|------------|------|--|
| Stu-rnd-1_family-417_LINE_RTE  | -----      | -----      | -----      | -----      | 306        |            |            |      |  |
| Sly-rnd1_family377-LINE/RTEBov | -----      | -----      | -----      | -----      | 135        |            |            |      |  |
| Stu-rnd-1_family-489_LINE_RTE  | -----      | -----      | -----      | -----      | 87         |            |            |      |  |
| Stu-rnd-1_family-607_LINE_RTE  | -----      | -----      | -----      | -----      | 671        |            |            |      |  |
| Stu-rnd-1_family-645_LINE_RTE  | -----      | -----      | -----      | -----      | 437        |            |            |      |  |
| Sly-rnd4_family81-LINE/RTEBovB | -----      | -----      | -----      | -----      | 861        |            |            |      |  |
| Stu-rnd-6_family-408_LINE_RTE  | -----      | -----      | -----      | -----      | 393        |            |            |      |  |
| Stu-rnd-1_family-351_LINE_RTE  | -----      | -----      | -----      | -----      | 609        |            |            |      |  |
| Stu-rnd-1_family-382_LINE_RTE  | -----      | -----      | -----      | -----      | 347        |            |            |      |  |
| Sly-rnd6_family746-LINE/RTEBov | -----      | -----      | -----      | -----      | 122        |            |            |      |  |
| Stu-rnd-5_family-325_LINE_RTE  | -----      | -----      | -----      | -----      | 446        |            |            |      |  |
| Sly-rnd4_family509-LINE/RTEBov | -----      | -----      | -----      | -----      | 743        |            |            |      |  |
| Stu-rnd-1_family-513_LINE_RTE  | -----      | -----      | -----      | -----      | 65         |            |            |      |  |
| Sly-rnd5_family1442-LINE/RTEBo | -----      | -----      | -----      | -----      | 119        |            |            |      |  |
| BovB_GI-RTE-Gehyra_lazelli     | -----AA    | GGCTCCACAC | CAATCCTGTT | CCTAATGAAC | A-----T    | AGAAAATAAA | TCAATACTCG | 3558 |  |
| BovB_Gv-RTE-Gehyra_variegata   | GTTGTTGAAA | GGTTGTTGAA | AGATGGTGT  | TGTTATGACC | GGTGTGTTTT | CATGCCTAGA | ACGCTGTTAG | 3516 |  |
| BovB_PMo-RTE-Python_molurus    | -----      | -----      | -----      | -----      | -----      | -----      | -----      | 3288 |  |
| BovB_Oa-RTE-Ovis_aries         | -----      | -----      | -----      | -----      | -----      | -----      | -----      | 3259 |  |
| BovB-RTE-Bos_taurus            | -----      | -----      | -----      | -----      | -----      | -----      | -----      | 3847 |  |
| BovB_Me-RTE-Macropus_eugenii   | -----      | -----      | -----      | -----      | -----      | -----      | -----      | 2564 |  |
| BovB_Ano-RTE-Amphibolurus_norr | -----      | -----      | -----      | -----      | -----      | -----      | -----      | 3305 |  |
| BovB_Gd-RTE-Eremiascincus_doug | TGTGCACTCC | CA--GAACCC | TGCCCCCACT | CACCTGGTAG | AAGGCAGGCC | TGTGTCCTTC | AGGGAGCCAA | 3089 |  |
| BovB_Er-RTE-Eremiascincus_rich | CACCCGACTG | CAAGGAGATC | CAGTCGGGCA | ATCCTGCAGG | AAGTCAAGCC | TGATTGCTCC | CTGGAAGGAC | 3646 |  |
| BovB_Ca-RTE-Ctenotus_atlas     | -----      | -----      | -----      | -----      | -----      | -----      | -----      | 3419 |  |
| BovB_Es-RTE-Egernia_stokesii   | -----      | -----      | -----      | -----      | -----      | -----      | -----      | 3292 |  |
| BovB_Tr-RTE-Tiliqua_rugosa     | -----      | -----      | -----      | -----      | -----      | -----      | -----      | 3260 |  |
| BovB_ALi-RTE-Amblyomma_limbatu | TTTGACGGGG | ACTTTCTCAT | TGTTTGCCT  | CATGCTTCTA | T-----     | -----      | -----      | 3645 |  |
| BovB_Hs-RTE-Hydrophis_spiralis | TTAATGACAG | TCTATAAAAC | AATGCTCACA | AATGGATTTA | TGCT-----  | -----      | -----      | 1893 |  |
| BovB_VA-RTE-Vipera_ammodytes   | -----      | -----      | -----      | -----      | -----      | -----      | -----      | 3283 |  |
| BovB_ACo-RTE-Agkistrodon_conto | -----      | -----      | -----      | -----      | -----      | -----      | -----      | 3282 |  |
| BovB_Pg-RTE-Perameles_gunnii   | AAG-----   | -----      | -----      | -----      | -----      | -----      | -----      | 1556 |  |
| BovB_lo-RTE-Isodon_obesulus    | -----      | -----      | -----      | -----      | -----      | -----      | -----      | 1941 |  |
| BovB_Bp-RTE-Burramys_parvulus  | -----      | -----      | -----      | -----      | -----      | -----      | -----      | 2067 |  |
| BovB_Pb-RTE-Petaurus_breviceps | -----      | -----      | -----      | -----      | -----      | -----      | -----      | 2110 |  |
| BovB_Ma-RTE-Macropus_antilopin | -----      | -----      | -----      | -----      | -----      | -----      | -----      | 3393 |  |
| BovB_Af-RTE-Antechinus_flavipe | -----      | -----      | -----      | -----      | -----      | -----      | -----      | 2576 |  |
| BovB_Ac-RTE-Anolis_carolinensi | -----      | -----      | -----      | -----      | -----      | -----      | -----      | 3180 |  |
| BovB_BM-RTE-Bombyx_mori        | -----      | -----      | -----      | -----      | -----      | -----      | -----      | 2863 |  |
| BovB_Dr-RTE-Christinus         | -----      | -----      | -----      | -----      | -----      | -----      | -----      | 3089 |  |
| BovB_La-RTE-Loxodonta_africana | -----      | -----      | -----      | -----      | -----      | -----      | -----      | 3211 |  |
| BovB_Pc-RTE-Procavia_capensis  | -----      | -----      | -----      | -----      | -----      | -----      | -----      | 3221 |  |
| BovB_Et-RTE-Christinus         | -----      | -----      | -----      | -----      | -----      | -----      | -----      | 2573 |  |
| BovB_Ta-RTE-Tachyglossus_acule | -----      | -----      | -----      | -----      | -----      | -----      | -----      | 3384 |  |
| BovB_Plat-RTE-Ornithorhynchus  | -----      | -----      | -----      | -----      | -----      | -----      | -----      | 3349 |  |
| BovB_Ec-RTE-Equus_caballus     | -----      | -----      | -----      | -----      | -----      | -----      | -----      | 3111 |  |
| BovB_Cg-RTE-Christinus         | -----      | -----      | -----      | -----      | -----      | -----      | -----      | 2776 |  |
| BovB_Bh-RTE-Bothriocroton_hydr | -----      | -----      | -----      | -----      | -----      | -----      | -----      | 1699 |  |
| BovB_MI-RTE-Gehyra_variegata   | -----      | -----      | -----      | -----      | -----      | -----      | -----      | 1449 |  |
| Sly-rnd1_family284-LINE/RTEBov | -----      | -----      | -----      | -----      | -----      | -----      | -----      | 56   |  |
| Sly-rnd5_family2019-LINE/RTEBo | -----      | -----      | -----      | -----      | -----      | -----      | -----      | 477  |  |
| Sly-rnd3_family322-LINE/RTEBov | -----      | -----      | -----      | -----      | -----      | -----      | -----      | 568  |  |
| Sly-rnd5_family1698-LINE/RTEBo | -----      | -----      | -----      | -----      | -----      | -----      | -----      | 231  |  |
| Sly-rnd1_family795-LINE/RTEBov | -----      | -----      | -----      | -----      | -----      | -----      | -----      | 538  |  |
| Stu-rnd-5_family-3162_LINE_RTE | -----      | -----      | -----      | -----      | -----      | -----      | -----      | 2547 |  |
| Sly-rnd6_family1960-LINE/RTEBo | -----      | -----      | -----      | -----      | -----      | -----      | -----      | 1316 |  |
| Stu-rnd-5_family-2493_LINE_RTE | -----      | -----      | -----      | -----      | -----      | -----      | -----      | 215  |  |
| Sly-rnd5_family447-LINE/RTEBov | -----      | -----      | -----      | -----      | -----      | -----      | -----      | 564  |  |
| Stu-rnd-6_family-2093_LINE_RTE | -----      | -----      | -----      | -----      | -----      | -----      | -----      | 105  |  |
| Consensus                      | -----      | -----      | -----      | -----      | -----      | -----      | -----      |      |  |
| Conservation                   | 100%<br>0% |            |            |            |            |            |            |      |  |

|                                | 4,640      | 4,660      | 4,680      |            |             |            |            |      |
|--------------------------------|------------|------------|------------|------------|-------------|------------|------------|------|
| Stu-rnd-1_family-417_LINE_RTE  |            |            |            | 306        |             |            |            |      |
| Sly-rnd1_family377-LINE/RTEBov |            |            |            | 135        |             |            |            |      |
| Stu-rnd-1_family-489_LINE_RTE  |            |            |            | 87         |             |            |            |      |
| Stu-rnd-1_family-607_LINE_RTE  |            |            |            | 671        |             |            |            |      |
| Stu-rnd-1_family-645_LINE_RTE  |            |            |            | 437        |             |            |            |      |
| Sly-rnd4_family81-LINE/RTEBovB |            |            |            | 861        |             |            |            |      |
| Stu-rnd-6_family-408_LINE_RTE  |            |            |            | 393        |             |            |            |      |
| Stu-rnd-1_family-351_LINE_RTE  |            |            |            | 609        |             |            |            |      |
| Stu-rnd-1_family-382_LINE_RTE  |            |            |            | 347        |             |            |            |      |
| Sly-rnd6_family746-LINE/RTEBov |            |            |            | 122        |             |            |            |      |
| Stu-rnd-5_family-325_LINE_RTE  |            |            |            | 446        |             |            |            |      |
| Sly-rnd4_family509-LINE/RTEBov |            |            |            | 743        |             |            |            |      |
| Stu-rnd-1_family-513_LINE_RTE  |            |            |            | 65         |             |            |            |      |
| Sly-rnd5_family1442-LINE/RTEBo |            |            |            | 119        |             |            |            |      |
| BovB_GI-RTE-Gehyra_lazelli     | TTGAAGCCAA | ATAATATCAG | TTCGAGTCAA | AAGACCTAAT | GCAGAAACT   | ----TAAACC | AAACTCCCC  | 3623 |
| BovB_Gv-RTE-Gehyra_variegata   | CCTGTACCCA | GTGGGAACAT | AGCGGAG-AG | GGATCCCAGG | GCAAAAAATTG | TCCGTTATAC | AAGGGACTCC | 3585 |
| BovB_PMo-RTE-Python_molurus    |            |            |            |            |             |            |            | 3288 |
| BovB_Oa-RTE-Ovis_aries         |            |            |            |            |             |            |            | 3259 |
| BovB-RTE-Bos_taurus            |            |            |            |            |             |            |            | 3847 |
| BovB_Me-RTE-Macropus_eugenii   |            |            |            |            |             |            |            | 2564 |
| BovB_Ano-RTE-Amphibolurus_norr |            |            |            |            |             |            |            | 3305 |
| BovB_Gd-RTE-Eremiascincus_doug | AGCCAACCTA | GTAAAAGGGG | CTGAACCCGG | --TTCTTCC- |             |            |            | 3126 |
| BovB_Er-RTE-Eremiascincus_rich | AAATCCTGAA | GCTGAAGCTC | CAATACTTTG | GCTACCTCCT | GAGAAGAGAG  | GACTCTTTAG | AAAAAACCT  | 3716 |
| BovB_Ca-RTE-Ctenotus_atlas     |            |            |            |            |             |            |            | 3419 |
| BovB_Es-RTE-Egernia_stokesii   |            |            |            |            |             |            |            | 3292 |
| BovB_Tr-RTE-Tiliqua_rugosa     |            |            |            |            |             |            |            | 3260 |
| BovB_ALi-RTE-Amblyomma_limbatu |            |            |            |            |             |            |            | 3645 |
| BovB_Hs-RTE-Hydrophis_spiralis |            |            |            |            |             |            |            | 1893 |
| BovB_VA-RTE-Vipera_ammodytes   |            |            |            |            |             |            |            | 3283 |
| BovB_ACo-RTE-Agkistrodon_conto |            |            |            |            |             |            |            | 3282 |
| BovB_Pg-RTE-Perameles_gunnii   |            |            |            |            |             |            |            | 1556 |
| BovB_lo-RTE-Isodon_obesulus    |            |            |            |            |             |            |            | 1941 |
| BovB_Bp-RTE-Burramys_parvulus  |            |            |            |            |             |            |            | 2067 |
| BovB_Pb-RTE-Petaurus_breviceps |            |            |            |            |             |            |            | 2110 |
| BovB_Ma-RTE-Macropus_antilopin |            |            |            |            |             |            |            | 3393 |
| BovB_Af-RTE-Antechinus_flavipe |            |            |            |            |             |            |            | 2576 |
| BovB_Ac-RTE-Anolis_carolinensi |            |            |            |            |             |            |            | 3180 |
| BovB_BM-RTE-Bombyx_mori        |            |            |            |            |             |            |            | 2863 |
| BovB_Dr-RTE-Christinus         |            |            |            |            |             |            |            | 3089 |
| BovB_La-RTE-Loxodonta_africana |            |            |            |            |             |            |            | 3211 |
| BovB_Pc-RTE-Procavia_capensis  |            |            |            |            |             |            |            | 3221 |
| BovB_Et-RTE-Christinus         |            |            |            |            |             |            |            | 2573 |
| BovB_Ta-RTE-Tachyglossus_acule |            |            |            |            |             |            |            | 3384 |
| BovB_Plat-RTE-Ornithorhynchus  |            |            |            |            |             |            |            | 3349 |
| BovB_Ec-RTE-Equus_caballus     |            |            |            |            |             |            |            | 3111 |
| BovB_Cg-RTE-Christinus         |            |            |            |            |             |            |            | 2776 |
| BovB_Bh-RTE-Bothriocroton_hydr |            |            |            |            |             |            |            | 1699 |
| BovB_MI-RTE-Gehyra_variegata   |            |            |            |            |             |            |            | 1449 |
| Sly-rnd1_family284-LINE/RTEBov |            |            |            |            |             |            |            | 56   |
| Sly-rnd5_family2019-LINE/RTEBo |            |            |            |            |             |            |            | 477  |
| Sly-rnd3_family322-LINE/RTEBov |            |            |            |            |             |            |            | 568  |
| Sly-rnd5_family1698-LINE/RTEBo |            |            |            |            |             |            |            | 231  |
| Sly-rnd1_family795-LINE/RTEBov |            |            |            |            |             |            |            | 538  |
| Stu-rnd-5_family-3162_LINE_RTE |            |            |            |            |             |            |            | 2547 |
| Sly-rnd6_family1960-LINE/RTEBo |            |            |            |            |             |            |            | 1316 |
| Stu-rnd-5_family-2493_LINE_RTE |            |            |            |            |             |            |            | 215  |
| Sly-rnd5_family447-LINE/RTEBov |            |            |            |            |             |            |            | 564  |
| Stu-rnd-6_family-2093_LINE_RTE |            |            |            |            |             |            |            | 105  |
| Consensus                      |            |            |            |            |             |            |            |      |
| Conservation                   |            |            |            |            |             |            |            |      |

|                                | 4,700      | 4,720      | 4,740      | 4,760      |            |            |            |      |
|--------------------------------|------------|------------|------------|------------|------------|------------|------------|------|
| Stu-rnd-1_family-417_LINE_RTE  |            |            |            |            | 306        |            |            |      |
| Sly-rnd1_family377-LINE/RTEBov |            |            |            |            | 135        |            |            |      |
| Stu-rnd-1_family-489_LINE_RTE  |            |            |            |            | 87         |            |            |      |
| Stu-rnd-1_family-607_LINE_RTE  |            |            |            |            | 671        |            |            |      |
| Stu-rnd-1_family-645_LINE_RTE  |            |            |            |            | 437        |            |            |      |
| Sly-rnd4_family81-LINE/RTEBovB |            |            |            |            | 861        |            |            |      |
| Stu-rnd-6_family-408_LINE_RTE  |            |            |            |            | 393        |            |            |      |
| Stu-rnd-1_family-351_LINE_RTE  |            |            |            |            | 609        |            |            |      |
| Stu-rnd-1_family-382_LINE_RTE  |            |            |            |            | 347        |            |            |      |
| Sly-rnd6_family746-LINE/RTEBov |            |            |            |            | 122        |            |            |      |
| Stu-rnd-5_family-325_LINE_RTE  |            |            |            |            | 446        |            |            |      |
| Sly-rnd4_family509-LINE/RTEBov |            |            |            |            | 743        |            |            |      |
| Stu-rnd-1_family-513_LINE_RTE  |            |            |            |            | 65         |            |            |      |
| Sly-rnd5_family1442-LINE/RTEBo |            |            |            |            | 119        |            |            |      |
| BovB_GI-RTE-Gehyra_lazelli     | AAGAAGCCGA | ACAGAACCAA | AGCAACCG   |            | 3651       |            |            |      |
| BovB_Gv-RTE-Gehyra_variegata   | TGCCTCCCGA | GCAGCACGAA | AGCCCATAAA | AGCAACAA   | 3623       |            |            |      |
| BovB_PMo-RTE-Python_molurus    |            |            |            |            | 3288       |            |            |      |
| BovB_Oa-RTE-Ovis_aries         |            |            |            |            | 3259       |            |            |      |
| BovB-RTE-Bos_taurus            |            |            |            |            | 3847       |            |            |      |
| BovB_Me-RTE-Macropus_eugenii   |            |            |            |            | 2564       |            |            |      |
| BovB_Ano-RTE-Amphibolurus_norr |            |            |            |            | 3305       |            |            |      |
| BovB_Gd-RTE-Eremiascincus_doug |            |            |            |            | 3126       |            |            |      |
| BovB_Er-RTE-Eremiascincus_rich | CATGCTGGGA | AAGATTGAAG | GGAGAAGGAG | AAGGGGGCGG | CAGAGAAGGA | CATCAATAGA | GAATTTCTGT | 3786 |
| BovB_Ca-RTE-Ctenotus_atlas     |            |            |            |            | 3419       |            |            |      |
| BovB_Es-RTE-Egernia_stokesii   |            |            |            |            | 3292       |            |            |      |
| BovB_Tr-RTE-Tiliqua_rugosa     |            |            |            |            | 3260       |            |            |      |
| BovB_ALi-RTE-Amblyomma_limbatu |            |            |            |            | 3645       |            |            |      |
| BovB_Hs-RTE-Hydrophis_spiralis |            |            |            |            | 1893       |            |            |      |
| BovB_VA-RTE-Vipera_ammodytes   |            |            |            |            | 3283       |            |            |      |
| BovB_ACo-RTE-Agkistrodon_conto |            |            |            |            | 3282       |            |            |      |
| BovB_Pg-RTE-Perameles_gunnii   |            |            |            |            | 1556       |            |            |      |
| BovB_lo-RTE-Isodon_obesulus    |            |            |            |            | 1941       |            |            |      |
| BovB_Bp-RTE-Burramys_parvulus  |            |            |            |            | 2067       |            |            |      |
| BovB_Pb-RTE-Petaurus_breviceps |            |            |            |            | 2110       |            |            |      |
| BovB_Ma-RTE-Macropus_antilopin |            |            |            |            | 3393       |            |            |      |
| BovB_Af-RTE-Antechinus_flavipe |            |            |            |            | 2576       |            |            |      |
| BovB_Ac-RTE-Anolis_carolinensi |            |            |            |            | 3180       |            |            |      |
| BovB_BM-RTE-Bombyx_mori        |            |            |            |            | 2863       |            |            |      |
| BovB_Dr-RTE-Christinus         |            |            |            |            | 3089       |            |            |      |
| BovB_La-RTE-Loxodonta_africana |            |            |            |            | 3211       |            |            |      |
| BovB_Pc-RTE-Procavia_capensis  |            |            |            |            | 3221       |            |            |      |
| BovB_Et-RTE-Christinus         |            |            |            |            | 2573       |            |            |      |
| BovB_Ta-RTE-Tachyglossus_acule |            |            |            |            | 3384       |            |            |      |
| BovB_Plat-RTE-Ornithorhynchus  |            |            |            |            | 3349       |            |            |      |
| BovB_Ec-RTE-Equus_caballus     |            |            |            |            | 3111       |            |            |      |
| BovB_Cg-RTE-Christinus         |            |            |            |            | 2776       |            |            |      |
| BovB_Bh-RTE-Bothriocroton_hydr |            |            |            |            | 1699       |            |            |      |
| BovB_MI-RTE-Gehyra_variegata   |            |            |            |            | 1449       |            |            |      |
| Sly-rnd1_family284-LINE/RTEBov |            |            |            |            | 56         |            |            |      |
| Sly-rnd5_family2019-LINE/RTEBo |            |            |            |            | 477        |            |            |      |
| Sly-rnd3_family322-LINE/RTEBov |            |            |            |            | 568        |            |            |      |
| Sly-rnd5_family1698-LINE/RTEBo |            |            |            |            | 231        |            |            |      |
| Sly-rnd1_family795-LINE/RTEBov |            |            |            |            | 538        |            |            |      |
| Stu-rnd-5_family-3162_LINE_RTE |            |            |            |            | 2547       |            |            |      |
| Sly-rnd6_family1960-LINE/RTEBo |            |            |            |            | 1316       |            |            |      |
| Stu-rnd-5_family-2493_LINE_RTE |            |            |            |            | 215        |            |            |      |
| Sly-rnd5_family447-LINE/RTEBov |            |            |            |            | 564        |            |            |      |
| Stu-rnd-6_family-2093_LINE_RTE |            |            |            |            | 105        |            |            |      |
| Consensus                      |            |            |            |            |            |            |            |      |
| Conservation                   |            |            |            |            |            |            |            |      |

|                                | 4,780      | 4,800      |            |            |       |      |
|--------------------------------|------------|------------|------------|------------|-------|------|
| Stu-rnd-1_family-417_LINE_RTE  |            |            | 306        |            |       |      |
| Sly-rnd1_family377-LINE/RTEBov |            |            | 135        |            |       |      |
| Stu-rnd-1_family-489_LINE_RTE  |            |            | 87         |            |       |      |
| Stu-rnd-1_family-607_LINE_RTE  |            |            | 671        |            |       |      |
| Stu-rnd-1_family-645_LINE_RTE  |            |            | 437        |            |       |      |
| Sly-rnd4_family81-LINE/RTEBovB |            |            | 861        |            |       |      |
| Stu-rnd-6_family-408_LINE_RTE  |            |            | 393        |            |       |      |
| Stu-rnd-1_family-351_LINE_RTE  |            |            | 609        |            |       |      |
| Stu-rnd-1_family-382_LINE_RTE  |            |            | 347        |            |       |      |
| Sly-rnd6_family746-LINE/RTEBov |            |            | 122        |            |       |      |
| Stu-rnd-5_family-325_LINE_RTE  |            |            | 446        |            |       |      |
| Sly-rnd4_family509-LINE/RTEBov |            |            | 743        |            |       |      |
| Stu-rnd-1_family-513_LINE_RTE  |            |            | 65         |            |       |      |
| Sly-rnd5_family1442-LINE/RTEBo |            |            | 119        |            |       |      |
| BovB_GI-RTE-Gehyra_lazelli     |            |            | 3651       |            |       |      |
| BovB_Gv-RTE-Gehyra_variegata   |            |            | 3623       |            |       |      |
| BovB_PMo-RTE-Python_molurus    |            |            | 3288       |            |       |      |
| BovB_Oa-RTE-Ovis_aries         |            |            | 3259       |            |       |      |
| BovB-RTE-Bos_taurus            |            |            | 3847       |            |       |      |
| BovB_Me-RTE-Macropus_eugenii   |            |            | 2564       |            |       |      |
| BovB_Ano-RTE-Amphibolurus_norr |            |            | 3305       |            |       |      |
| BovB_Gd-RTE-Eremiascincus_doug |            |            | 3126       |            |       |      |
| BovB_Er-RTE-Eremiascincus_rich | AGGTAAATTA | TTAATGTGAA | ATTCAGCTAA | CTTACACGAG | TCTAC | 3831 |
| BovB_Ca-RTE-Ctenotus_atlas     |            |            |            |            |       | 3419 |
| BovB_Es-RTE-Egernia_stokesii   |            |            |            |            |       | 3292 |
| BovB_Tr-RTE-Tiliqua_rugosa     |            |            |            |            |       | 3260 |
| BovB_ALI-RTE-Amblyomma_limbatu |            |            |            |            |       | 3645 |
| BovB_Hs-RTE-Hydrophis_spiralis |            |            |            |            |       | 1893 |
| BovB_VA-RTE-Vipera_ammodytes   |            |            |            |            |       | 3283 |
| BovB_ACo-RTE-Agkistrodon_conto |            |            |            |            |       | 3282 |
| BovB_Pg-RTE-Perameles_gunnii   |            |            |            |            |       | 1556 |
| BovB_lo-RTE-Isodon_obesulus    |            |            |            |            |       | 1941 |
| BovB_Bp-RTE-Burramys_parvulus  |            |            |            |            |       | 2067 |
| BovB_Pb-RTE-Petaurus_breviceps |            |            |            |            |       | 2110 |
| BovB_Ma-RTE-Macropus_antilopin |            |            |            |            |       | 3393 |
| BovB_Af-RTE-Antechinus_flavipe |            |            |            |            |       | 2576 |
| BovB_Ac-RTE-Anolis_carolinensi |            |            |            |            |       | 3180 |
| BovB_BM-RTE-Bombyx_mori        |            |            |            |            |       | 2863 |
| BovB_Dr-RTE-Christinus         |            |            |            |            |       | 3089 |
| BovB_La-RTE-Loxodonta_africana |            |            |            |            |       | 3211 |
| BovB_Pc-RTE-Procavia_capensis  |            |            |            |            |       | 3221 |
| BovB_Et-RTE-Christinus         |            |            |            |            |       | 2573 |
| BovB_Ta-RTE-Tachyglossus_acule |            |            |            |            |       | 3384 |
| BovB_Plat-RTE-Ornithorhynchus  |            |            |            |            |       | 3349 |
| BovB_Ec-RTE-Equus_caballus     |            |            |            |            |       | 3111 |
| BovB_Cg-RTE-Christinus         |            |            |            |            |       | 2776 |
| BovB_Bh-RTE-Bothriocroton_hydr |            |            |            |            |       | 1699 |
| BovB_MI-RTE-Gehyra_variegata   |            |            |            |            |       | 1449 |
| Sly-rnd1_family284-LINE/RTEBov |            |            |            |            |       | 56   |
| Sly-rnd5_family2019-LINE/RTEBo |            |            |            |            |       | 477  |
| Sly-rnd3_family322-LINE/RTEBov |            |            |            |            |       | 568  |
| Sly-rnd5_family1698-LINE/RTEBo |            |            |            |            |       | 231  |
| Sly-rnd1_family795-LINE/RTEBov |            |            |            |            |       | 538  |
| Stu-rnd-5_family-3162_LINE_RTE |            |            |            |            |       | 2547 |
| Sly-rnd6_family1960-LINE/RTEBo |            |            |            |            |       | 1316 |
| Stu-rnd-5_family-2493_LINE_RTE |            |            |            |            |       | 215  |
| Sly-rnd5_family447-LINE/RTEBov |            |            |            |            |       | 564  |
| Stu-rnd-6_family-2093_LINE_RTE |            |            |            |            |       | 105  |
| Consensus                      |            |            |            |            |       |      |
| Conservation                   |            |            |            |            |       |      |
