# Supplementary material for: A Deluge of Complex Repeats: The Solanum Genome
Source: PubMed Central journal article supplement (PMC4524691; doi:10.1371/journal.pone.0133962), 2015-08-04
Supplement: pone.0133962.s006.pdf [file pone.0133962.s006.pdf]

|                             | 20         | 40         | 60         |            |            |            |            |    |
|-----------------------------|------------|------------|------------|------------|------------|------------|------------|----|
| Dipodomys_ordii             |            |            |            |            |            |            |            |    |
| Laurasiatheria              |            |            |            |            |            |            |            |    |
| Eutheria                    |            |            |            |            |            |            |            |    |
| Tarsius_syrichta            |            |            |            |            |            |            |            |    |
| Muridae                     |            |            |            |            |            |            |            |    |
| Gasterosteus_aculeatus      |            |            |            |            |            |            |            |    |
| Felis_silvestris            |            |            |            |            |            |            |            |    |
| Rattus                      |            |            |            |            |            |            |            |    |
| Papio_hamadryas             |            |            |            |            |            |            |            |    |
| Pan_troglodytes             |            |            |            |            |            |            |            |    |
| Ailuropoda_melanoleuca      |            |            |            |            |            |            |            |    |
| Cavia_porcellus             |            |            |            |            |            |            |            |    |
| Ictidomys_tridecemlineatus  |            |            |            |            |            |            |            |    |
| Canis                       |            |            |            |            |            |            |            |    |
| Felis_catus                 |            |            |            |            |            |            |            |    |
| Ochotona_princeps           |            |            |            |            |            |            |            |    |
| Cercopithecidae             |            |            |            |            |            |            |            |    |
| Carnivora                   |            |            |            |            |            |            |            |    |
| Mus                         |            |            |            |            |            |            |            |    |
| Mus_musculus                |            |            |            |            |            |            |            |    |
| Rattus_norvegicus           |            |            |            |            |            |            |            |    |
| Tursiops_truncatus          |            |            |            |            |            |            |            |    |
| Procavia_capensis           |            |            |            |            |            |            |            |    |
| Primates                    |            |            |            |            |            |            |            |    |
| Echinops_telfairi           |            |            |            |            |            |            |            |    |
| Sorex_araneus               |            |            |            |            |            |            |            |    |
| Canidae                     |            |            |            |            |            |            |            |    |
| Otolemur_garnettii          |            |            |            |            |            |            |            |    |
| Gallus                      |            |            |            |            |            |            |            |    |
| Callithrix_jacchus          |            |            |            |            |            |            |            |    |
| Crocodylus_porosus          |            |            |            |            |            |            |            |    |
| Erinaceus_europaeus         |            |            |            |            |            |            |            |    |
| rnd-6_family-7426-LTR-ERV1  |            |            |            |            |            |            |            |    |
| Esox_lucius                 |            |            |            |            |            |            |            |    |
| Salmo_salar                 |            |            |            |            |            |            |            |    |
| Didelphidae                 |            |            |            |            |            |            |            |    |
| Latimeria_chalumnae         |            |            |            |            |            |            |            |    |
| Monodelphis_domestica       |            |            |            |            |            |            |            |    |
| Macropus_eugenii            |            |            |            |            |            |            |            |    |
| Alligator_mississippiensis  |            |            |            |            |            |            |            |    |
| Chrysemys_picta_bellii      |            |            |            |            |            |            |            |    |
| Danio_rerio                 |            |            |            |            |            |            |            |    |
| Taeniopygia                 |            |            |            |            |            |            |            |    |
| Dasyus_novemcinctus         |            |            |            |            |            |            |            |    |
| LTR_XT                      |            |            |            |            |            |            |            |    |
| Haplorrhini                 | TTTCTGGGGG | CTCGTCCGGG | ATTGGAGATG | GCAGGTTTCT | GTCTCCTTTG | CCTGTGGGCT | AGAGCCCCAG | 70 |
| Catarrhini                  |            |            |            |            |            |            |            |    |
| Anolis_carolinensis         |            |            |            |            |            |            |            |    |
| Murine_leukemia_virus       |            |            |            |            |            |            |            |    |
| Phascolarctos_cinereus      |            |            |            |            |            |            |            |    |
| Estrildidae                 |            |            |            |            |            |            |            |    |
| Xenopus_Silurana_tropicalis |            |            |            |            |            |            |            |    |
| L_XT                        |            |            |            |            |            |            |            |    |
| Takifugu_rubripes           |            |            |            |            |            |            |            |    |
| Bos_taurus                  |            |            |            |            |            |            |            |    |
| Homo_sapiens                |            |            |            |            |            |            |            |    |
| Microcebus_murinus          |            |            |            |            |            |            |            |    |
| Myotis_lucifugus            |            |            |            |            |            |            |            |    |
| Equus_caballus              |            |            |            |            |            |            |            |    |
| Tupaia_belangeri            |            |            |            |            |            |            |            |    |
| Loxodonta_africana          |            |            |            |            |            |            |            |    |
| Murinae                     |            |            |            |            |            |            |            |    |
| Canis_lupus_familiaris      |            |            |            |            |            |            |            |    |
| Sus_scrofa                  |            |            |            |            |            |            |            |    |
| Choloepus_hoffmanni         |            |            |            |            |            |            |            |    |
| Vicugna_pacos               |            |            |            |            |            |            |            |    |
| Gavialis_gangeticus         |            |            |            |            |            |            |            |    |
| Mammalia                    |            |            |            |            |            |            |            |    |
| Passeroidea                 |            |            |            |            |            |            |            |    |
| Takifugu                    |            |            |            |            |            |            |            |    |
| Pteropus_vampyrus           |            |            |            |            |            |            |            |    |
| Ornithorhynchus             |            |            |            |            |            |            |            |    |
| Oryctolagus_cuniculus       |            |            |            |            |            |            |            |    |
| Gallus_gallus               |            |            |            |            |            |            |            |    |
| Hominidae                   |            |            |            |            |            |            |            |    |
| Metatheria                  |            |            |            |            |            |            |            |    |
| Rodentia                    |            |            |            |            |            |            |            |    |
| Monodelphis                 |            |            |            |            |            |            |            |    |
| Consensus                   |            |            |            |            |            |            |            |    |
| Conservation                |            |            |            |            |            |            |            |    |

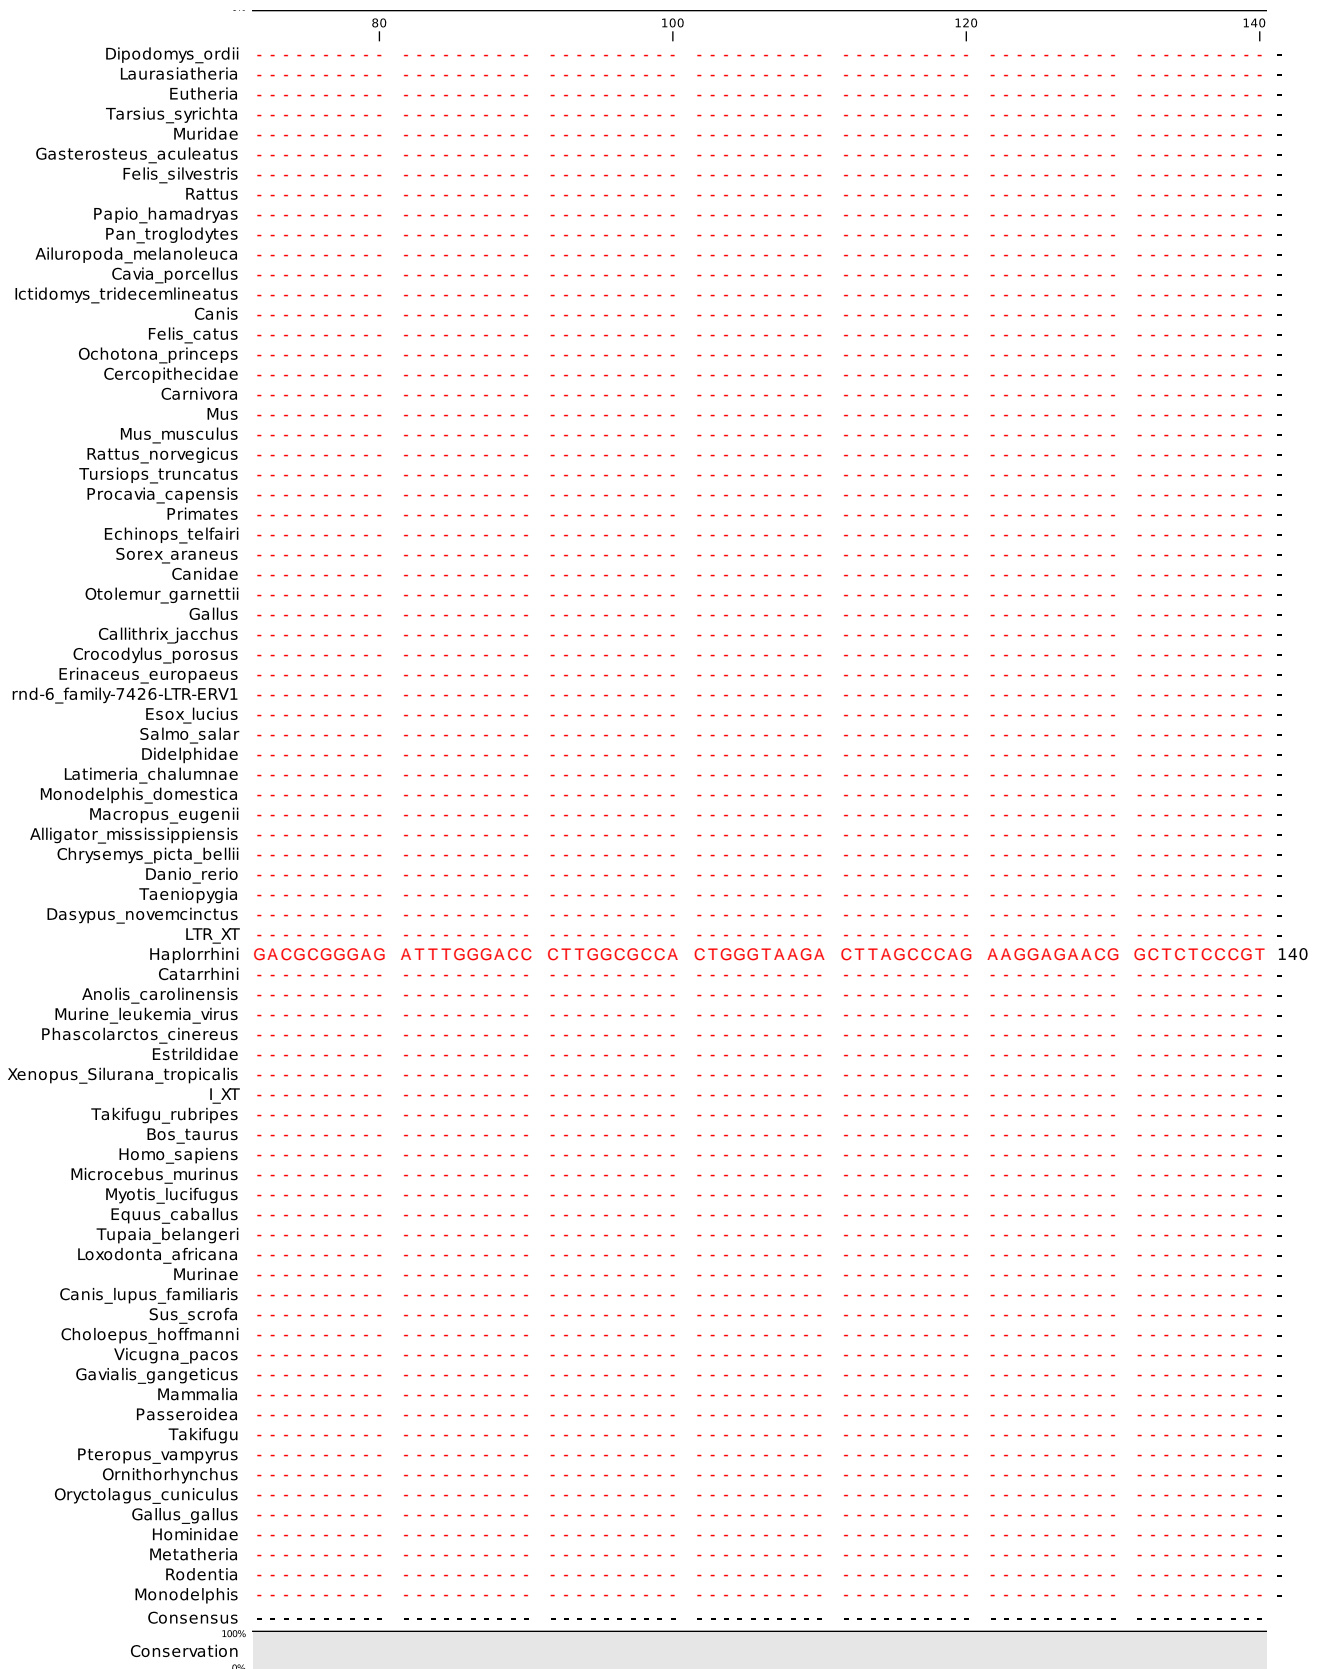

|                             | 160        | 180        | 200        |            |            |            |            |     |
|-----------------------------|------------|------------|------------|------------|------------|------------|------------|-----|
| Dipodomys_ordii             |            |            |            |            |            |            |            |     |
| Laurasiatheria              |            |            |            |            |            |            |            |     |
| Eutheria                    |            |            |            |            |            |            |            |     |
| Tarsius_syrichta            |            |            |            |            |            |            |            |     |
| Muridae                     |            |            |            |            |            |            |            |     |
| Gasterosteus_aculeatus      |            |            |            |            |            |            |            |     |
| Felis_silvestris            |            |            |            |            |            |            |            |     |
| Rattus                      |            |            |            |            |            |            |            |     |
| Papio_hamadryas             |            |            |            |            |            |            |            |     |
| Pan_troglodytes             |            |            |            |            |            |            |            |     |
| Ailuropoda_melanoleuca      |            |            |            |            |            |            |            |     |
| Cavia_porcellus             |            |            |            |            |            |            |            |     |
| Ictidomys_tridecemlineatus  |            |            |            |            |            |            |            |     |
| Canis                       |            |            |            |            |            |            |            |     |
| Felis_catus                 |            |            |            |            |            |            |            |     |
| Ochotona_princeps           |            |            |            |            |            |            |            |     |
| Cercopithecidae             |            |            |            |            |            |            |            |     |
| Carnivora                   |            |            |            |            |            |            |            |     |
| Mus                         |            |            |            |            |            |            |            |     |
| Mus_musculus                |            |            |            |            |            |            |            |     |
| Rattus_norvegicus           |            |            |            |            |            |            |            |     |
| Tursiops_truncatus          |            |            |            |            |            |            |            |     |
| Procyon_capensis            |            |            |            |            |            |            |            |     |
| Primates                    |            |            |            |            |            |            |            |     |
| Echinops_telfairi           |            |            |            |            |            |            |            |     |
| Sorex_araneus               |            |            |            |            |            |            |            |     |
| Canidae                     |            |            |            |            |            |            |            |     |
| Otolemur_garnettii          |            |            |            |            |            |            |            |     |
| Gallus                      |            |            |            |            |            |            |            |     |
| Callithrix_jacchus          |            |            |            |            |            |            |            |     |
| Crocodylus_porosus          |            |            |            |            |            |            |            |     |
| Erinaceus_europaeus         |            |            |            |            |            |            |            |     |
| rnd-6_family-7426-LTR-ERV1  |            |            |            |            |            |            |            |     |
| Esox_lucius                 |            |            |            |            |            |            |            |     |
| Salmo_salar                 |            |            |            |            |            |            |            |     |
| Didelphidae                 |            |            |            |            |            |            |            |     |
| Latimeria_chalumnae         |            |            |            |            |            |            |            |     |
| Monodelphis_domestica       |            |            |            |            |            |            |            |     |
| Macropus_eugenii            |            |            |            |            |            |            |            |     |
| Alligator_mississippiensis  |            |            |            |            |            |            |            |     |
| Chrysemys_picta_bellii      |            |            |            |            |            |            |            |     |
| Danio_rerio                 |            |            |            |            |            |            |            |     |
| Taeniopygia                 |            |            |            |            |            |            |            |     |
| Dasybus_novemcinctus        |            |            |            |            |            |            |            |     |
| LTR_XT                      |            |            |            |            |            |            |            |     |
| Haplorrhini                 | GTCTTGGAGC | CTTCCCCTGA | CAGCGCAAAC | GGAACCGACT | CAGGAGTTGC | AGGACAGTCA | CAGGAGCAGC | 210 |
| Catarrhini                  |            |            |            |            |            |            |            |     |
| Anolis_carolinensis         |            |            |            |            |            |            |            |     |
| Murine_leukemia_virus       |            |            |            |            |            |            |            |     |
| Phascolarctos_cinereus      |            |            |            |            |            |            |            |     |
| Estrildidae                 |            |            |            |            |            |            |            |     |
| Xenopus_Silurana_tropicalis |            |            |            |            |            |            |            |     |
| L_XT                        |            |            |            |            |            |            |            |     |
| Takifugu_rubripes           |            |            |            |            |            |            |            |     |
| Bos_taurus                  |            |            |            |            |            |            |            |     |
| Homo_sapiens                |            |            |            |            |            |            |            |     |
| Microcebus_murinus          |            |            |            |            |            |            |            |     |
| Myotis_lucifugus            |            |            |            |            |            |            |            |     |
| Equus_caballus              |            |            |            |            |            |            |            |     |
| Tupaia_belangeri            |            |            |            |            |            |            |            |     |
| Loxodonta_africana          |            |            |            |            |            |            |            |     |
| Murinae                     |            |            |            |            |            |            |            |     |
| Canis_lupus_familiaris      |            |            |            |            |            |            |            |     |
| Sus_scrofa                  |            |            |            |            |            |            |            |     |
| Choloepus_hoffmanni         |            |            |            |            |            |            |            |     |
| Vicugna_pacos               |            |            |            |            |            |            |            |     |
| Gavialis_gangeticus         |            |            |            |            |            |            |            |     |
| Mammalia                    |            |            |            |            |            |            |            |     |
| Passeroidea                 |            |            |            |            |            |            |            |     |
| Takifugu                    |            |            |            |            |            |            |            |     |
| Pteropus_vampyrus           |            |            |            |            |            |            |            |     |
| Ornithorhynchus             |            |            |            |            |            |            |            |     |
| Oryctolagus_cuniculus       |            |            |            |            |            |            |            |     |
| Gallus_gallus               |            |            |            |            |            |            |            |     |
| Hominidae                   |            |            |            |            |            |            |            |     |
| Metatheria                  |            |            |            |            |            |            |            |     |
| Rodentia                    |            |            |            |            |            |            |            |     |
| Monodelphis                 |            |            |            |            |            |            |            |     |
| Consensus                   |            |            |            |            |            |            |            |     |
| Conservation                |            |            |            |            |            |            |            |     |

|                             | 220       | 240        | 260        | 280        |            |           |            |     |
|-----------------------------|-----------|------------|------------|------------|------------|-----------|------------|-----|
| Dipodomys_ordii             |           |            |            |            |            |           |            |     |
| Laurasiatheria              |           |            |            |            |            |           |            |     |
| Eutheria                    |           |            |            |            |            |           |            |     |
| Tarsius_syrichta            |           |            |            |            |            |           |            |     |
| Muridae                     |           |            |            |            |            |           |            |     |
| Gasterosteus_aculeatus      |           |            |            |            |            |           |            |     |
| Felis_silvestris            |           |            |            |            |            |           |            |     |
| Rattus                      |           |            |            |            |            |           |            |     |
| Papio_hamadryas             |           |            |            |            |            |           |            |     |
| Pan_troglodytes             |           |            |            |            |            |           |            |     |
| Ailuropoda_melanoleuca      |           |            |            |            |            |           |            |     |
| Cavia_porcellus             |           |            |            |            |            |           |            |     |
| Ictidomys_tridecemlineatus  |           |            |            |            |            |           |            |     |
| Canis                       |           |            |            |            |            |           |            |     |
| Felis_catus                 |           |            |            |            |            |           |            |     |
| Ochotona_princeps           |           |            |            |            |            |           |            |     |
| Cercopithecidae             |           |            |            |            |            |           |            |     |
| Carnivora                   |           |            |            |            |            |           |            |     |
| Mus                         |           |            |            |            |            |           |            |     |
| Mus_musculus                |           |            |            |            |            |           |            |     |
| Rattus_norvegicus           |           |            |            |            |            |           |            |     |
| Tursiops_truncatus          |           |            |            |            |            |           |            |     |
| Procavia_capensis           |           |            |            |            |            |           |            |     |
| Primates                    |           |            |            |            |            |           |            |     |
| Echinops_telfairi           |           |            |            |            |            |           |            |     |
| Sorex_araneus               |           |            |            |            |            |           |            |     |
| Canidae                     |           |            |            |            |            |           |            |     |
| Otolemur_garnettii          |           |            |            |            |            |           |            |     |
| Gallus                      |           |            |            |            |            |           |            |     |
| Callithrix_jacchus          |           |            |            |            |            |           |            |     |
| Crocodylus_porosus          |           |            |            |            |            |           |            |     |
| Erinaceus_europaeus         |           |            |            |            |            |           |            |     |
| rnd-6_family-7426-LTR-ERV1  |           |            |            |            |            |           |            |     |
| Esox_lucius                 |           |            |            |            |            |           |            |     |
| Salmo_salar                 |           |            |            |            |            |           |            |     |
| Didelphidae                 |           |            |            |            |            |           |            |     |
| Latimeria_chalumnae         |           |            |            |            |            |           |            |     |
| Monodelphis_domestica       |           |            |            |            |            |           |            |     |
| Macropus_eugenii            |           |            |            |            |            |           |            |     |
| Alligator_mississippiensis  |           |            |            |            |            |           |            |     |
| Chrysemys_picta_bellii      |           |            |            |            |            |           |            |     |
| Danio_rerio                 |           |            |            |            |            |           |            |     |
| Taeniopygia                 |           |            |            |            |            |           |            |     |
| Dasyus_novemcinctus         |           |            |            |            |            |           |            |     |
| LTR_XT                      |           |            |            |            |            |           |            |     |
| Haplorrhini                 | GGCAGGCAG | ACTACTGAAC | CACGGTAAGG | TTGGGCCCTG | GGAAAGCCCG | TCCATAAGG | ACAGAAGGGG | 280 |
| Catarrhini                  |           |            |            |            |            |           |            | T 1 |
| Anolis_carolinensis         |           |            |            |            |            |           |            |     |
| Murine_leukemia_virus       |           |            |            |            |            |           |            |     |
| Phascolarctos_cinereus      |           |            |            |            |            |           |            |     |
| Estrildidae                 |           |            |            |            |            |           |            |     |
| Xenopus_Silurana_tropicalis |           |            |            |            |            |           |            |     |
| L_XT                        |           |            |            |            |            |           |            |     |
| Takifugu_rubripes           |           |            |            |            |            |           |            |     |
| Bos_taurus                  |           |            |            |            |            |           |            |     |
| Homo_sapiens                |           |            |            |            |            |           |            |     |
| Microcebus_murinus          |           |            |            |            |            |           |            |     |
| Myotis_lucifugus            |           |            |            |            |            |           |            |     |
| Equus_caballus              |           |            |            |            |            |           |            |     |
| Tupaia_belangeri            |           |            |            |            |            |           |            |     |
| Loxodonta_africana          |           |            |            |            |            |           |            |     |
| Murinae                     |           |            |            |            |            |           |            |     |
| Canis_lupus_familiaris      |           |            |            |            |            |           |            |     |
| Sus_scrofa                  |           |            |            |            |            |           |            |     |
| Choloepus_hoffmanni         |           |            |            |            |            |           |            |     |
| Vicugna_pacos               |           |            |            |            |            |           |            |     |
| Gavialis_gangeticus         |           |            |            |            |            |           |            |     |
| Mammalia                    |           |            |            |            |            |           |            |     |
| Passeroidea                 |           |            |            |            |            |           |            |     |
| Takifugu                    |           |            |            |            |            |           |            |     |
| Pteropus_vampyrus           |           |            |            |            |            |           |            |     |
| Ornithorhynchus             |           |            |            |            |            |           |            |     |
| Oryctolagus_cuniculus       |           |            |            |            |            |           |            |     |
| Gallus_gallus               |           |            |            |            |            |           |            |     |
| Hominidae                   |           |            |            |            |            |           |            |     |
| Metatheria                  |           |            |            |            |            |           |            |     |
| Rodentia                    |           |            |            |            |            |           |            |     |
| Monodelphis                 |           |            |            |            |            |           |            |     |
| Consensus                   |           |            |            |            |            |           |            |     |
| Conservation                | 100%      |            |            |            |            |           |            | 0%  |



|                             | 300        | 320        | 340        |            |            |             |            |     |
|-----------------------------|------------|------------|------------|------------|------------|-------------|------------|-----|
| Dipodomys_ordii             |            |            |            |            |            |             |            |     |
| Laurasiatheria              |            |            |            |            |            |             |            |     |
| Eutheria                    |            |            |            |            |            |             |            |     |
| Tarsius_syricha             |            |            |            |            |            |             |            |     |
| Muridae                     |            |            |            |            |            |             |            |     |
| Gasterosteus_aculeatus      |            |            |            |            |            |             |            |     |
| Felis_silvestris            |            |            |            |            |            |             |            |     |
| Rattus                      |            |            |            |            |            |             |            |     |
| Papio_hamadryas             |            |            |            |            |            |             |            |     |
| Pan_troglodytes             |            |            |            |            |            |             |            |     |
| Ailuropoda_melanoleuca      |            |            |            |            |            |             |            |     |
| Cavia_porcellus             |            |            |            |            |            |             |            |     |
| Ictidomys_tridecemlineatus  |            |            |            |            |            |             |            |     |
| Canis                       |            |            |            |            |            |             |            |     |
| Felis_catus                 |            |            |            |            |            |             |            |     |
| Ochotona_princeps           |            |            |            |            |            |             |            |     |
| Cercopithecidae             |            |            |            |            |            |             |            |     |
| Carnivora                   |            |            |            |            |            |             |            |     |
| Mus                         |            |            |            |            |            |             |            |     |
| Mus_musculus                |            |            |            |            |            |             |            |     |
| Rattus_norvegicus           |            |            |            |            |            |             |            |     |
| Tursiops_truncatus          |            |            |            |            |            |             |            |     |
| Procyon_capensis            |            |            |            |            |            |             |            |     |
| Primates                    |            |            |            |            |            |             |            |     |
| Echinops_telfairi           |            |            |            |            |            |             |            |     |
| Sorex_araneus               |            |            |            |            |            |             |            |     |
| Canidae                     |            |            |            |            |            |             |            |     |
| Otolemur_garnettii          |            |            |            |            |            |             |            |     |
| Gallus                      |            |            |            |            |            |             |            |     |
| Callithrix_jacchus          |            |            |            |            |            |             |            |     |
| Crocodylus_porosus          |            |            |            |            |            |             |            |     |
| Erinaceus_europaeus         |            |            |            |            |            |             |            |     |
| rnd-6_family-7426-LTR-ERV1  |            |            |            |            |            |             |            |     |
| Esox_lucius                 |            |            |            |            |            |             |            |     |
| Salmo_salar                 |            |            |            |            |            |             |            |     |
| Didelphidae                 |            |            |            |            |            |             |            |     |
| Latimeria_chalumnae         |            |            |            |            |            |             |            |     |
| Monodelphis_domestica       |            |            |            |            |            |             |            |     |
| Macropus_eugenii            |            |            |            |            |            |             |            |     |
| Alligator_mississippiensis  |            |            |            |            |            |             |            |     |
| Chrysemys_picta_bellii      |            |            |            |            |            |             |            |     |
| Danio_rerio                 |            |            |            |            |            |             |            |     |
| Taeniopygia                 |            |            |            |            |            |             |            |     |
| Dasybus_novemcinctus        |            |            |            |            |            |             |            |     |
| LTR_XT                      |            |            |            |            |            |             |            |     |
| Haplorrhini                 | AGCTTGATCA | CCTCCCAGGG | AACGACCACT | TATCCAACCC | AGAGTGGCTG | GGGGCGGCAG  | GAGTGGCCTG | 350 |
| Catarrhini                  | TTCTTGGTTC | CCTGACCGGG | AA--GCGAGG | TGATTAACGG | ACGGTCGA-G | GCAGCCCCCTT | AGGCGGCTTA | 68  |
| Anolis_carolinensis         |            |            |            |            |            |             |            |     |
| Murine_leukemia_virus       |            |            |            |            |            |             |            |     |
| Phascolarctos_cinereus      |            |            |            |            |            |             |            |     |
| Estrildidae                 |            |            |            |            |            |             |            |     |
| Xenopus_Silurana_tropicalis |            |            |            |            |            |             |            |     |
| L_XT                        |            |            |            |            |            |             |            |     |
| Takifugu_rubripes           |            |            |            |            |            |             |            |     |
| Bos_taurus                  |            |            |            |            |            |             |            |     |
| Homo_sapiens                |            |            |            |            |            |             |            |     |
| Microcebus_murinus          |            |            |            |            |            |             |            |     |
| Myotis_lucifugus            |            |            |            |            |            |             |            |     |
| Equus_caballus              |            |            |            |            |            |             |            |     |
| Tupaia_belangeri            |            |            |            |            |            |             |            |     |
| Loxodonta_africana          |            |            |            |            |            |             |            |     |
| Murinae                     |            |            |            |            |            |             |            |     |
| Canis_lupus_familiaris      |            |            |            |            |            |             |            |     |
| Sus_scrofa                  |            |            |            |            |            |             |            |     |
| Choloepus_hoffmanni         |            |            |            |            |            |             |            |     |
| Vicugna_pacos               |            |            |            |            |            |             |            |     |
| Gavialis_gangeticus         |            |            |            |            |            |             |            |     |
| Mammalia                    |            |            |            |            |            |             |            |     |
| Passeroidea                 |            |            |            |            |            |             |            |     |
| Takifugu                    |            |            |            |            |            |             |            |     |
| Pteropus_vampyrus           |            |            |            |            |            |             |            |     |
| Ornithorhynchus             |            |            |            |            |            |             |            |     |
| Oryctolagus_cuniculus       |            |            |            |            |            |             |            |     |
| Gallus_gallus               |            |            |            |            |            |             |            |     |
| Hominidae                   |            |            |            |            |            |             |            |     |
| Metatheria                  |            |            |            |            |            |             |            |     |
| Rodentia                    |            |            |            |            |            |             |            |     |
| Monodelphis                 |            |            |            |            |            |             |            |     |
| Consensus                   |            |            |            |            |            |             |            |     |
| Conservation                | 100%       |            |            |            |            |             |            |     |
|                             | 0%         |            |            |            |            |             |            |     |

|                             | 360        | 380        | 400        | 420        |             |            |            |     |
|-----------------------------|------------|------------|------------|------------|-------------|------------|------------|-----|
| Dipodomys_ordii             |            |            |            |            |             |            |            |     |
| Laurasiatheria              |            |            |            |            |             |            |            |     |
| Eutheria                    |            |            |            |            |             |            |            |     |
| Tarsius_syricha             |            |            |            |            |             |            |            |     |
| Muridae                     |            |            |            |            |             |            |            |     |
| Gasterosteus_aculeatus      |            |            |            |            |             |            |            |     |
| Felis_silvestris            |            |            |            |            |             |            |            |     |
| Rattus                      |            |            |            |            |             |            |            |     |
| Papio_hamadryas             |            |            |            |            |             |            |            |     |
| Pan_troglodytes             |            |            |            |            |             |            |            |     |
| Ailuropoda_melanoleuca      |            |            |            |            |             |            |            |     |
| Cavia_porcellus             |            |            |            |            |             |            |            |     |
| Ictidomys_tridecemlineatus  |            |            |            |            |             |            |            |     |
| Canis                       |            |            |            |            |             |            |            |     |
| Felis_catus                 |            |            |            |            |             |            |            |     |
| Ochotona_princeps           |            |            |            |            |             |            |            |     |
| Cercopithecidae             |            |            |            |            |             |            |            |     |
| Carnivora                   |            |            |            |            |             |            |            |     |
| Mus                         |            |            |            |            |             |            |            |     |
| Mus_musculus                |            |            |            |            |             |            |            |     |
| Rattus_norvegicus           |            |            |            |            |             |            |            |     |
| Tursiops_truncatus          |            |            |            |            |             |            |            |     |
| Procapra_capensis           |            |            |            |            |             |            |            |     |
| Primates                    |            |            |            |            |             |            |            |     |
| Echinops_telfairi           |            |            |            |            |             |            |            |     |
| Sorex_araneus               |            |            |            |            |             |            |            |     |
| Canidae                     |            |            |            |            |             |            |            |     |
| Otolemur_garnettii          |            |            |            |            |             |            |            |     |
| Gallus                      |            |            |            |            |             |            |            |     |
| Callithrix_jacchus          |            |            |            |            |             |            |            |     |
| Crocodylus_porosus          |            |            |            |            |             |            |            |     |
| Erinaceus_europaeus         |            |            |            |            |             |            |            |     |
| rnd-6_family-7426-LTR-ERV1  |            |            |            |            |             |            |            |     |
| Esox_lucius                 |            |            |            |            |             |            |            |     |
| Salmo_salar                 |            |            |            |            |             |            |            |     |
| Didelphidae                 |            |            |            |            |             |            |            |     |
| Latimeria_chalumnae         |            |            |            |            |             |            |            |     |
| Monodelphis_domestica       |            |            |            |            |             |            |            |     |
| Macropus_eugenii            |            |            |            |            |             |            |            |     |
| Alligator_mississippiensis  |            |            |            |            |             |            |            |     |
| Chrysemys_picta_bellii      |            |            |            |            |             |            |            |     |
| Danio_rerio                 |            |            |            |            |             |            |            |     |
| Taeniopygia                 |            |            |            |            |             |            |            |     |
| Dasyus_novemcinctus         |            |            |            |            |             |            |            |     |
| LTR_XT                      |            |            |            |            |             |            |            |     |
| Haplorrhini                 | CCAATTTGGA | TGAACCTCGT | GTCCCCACTA | CAAGCGAAAG | TGGTTCAC TG | GATCTGGAGG | CAGAAACTGG | 420 |
| Catarrhini                  | G-----GCC  | TGCCTGTGG  | AGCATCCCTG | CGGGGGACTC | CGGCCAGCTT  | GAGC--GACG | CGGATCCTGA | 130 |
| Anolis_carolinensis         |            | TTTGGG     | GGCTCGTCCG | GGATCCGGAG | ACCCCCGCC   | AGGGACCACC | GACCCACCGT | 56  |
| Murine_leukemia_virus       |            | TTTGGG     | GGCTCGTCCG | GGATCTG-AG | ATTCCCACCC  | AAGGACCGCC | GAACCACCGA | 55  |
| Phascolarctos_cinereus      |            | TTTGGG     | GGCTCGTCCG |            |             |            |            |     |
| Estrildidae                 |            |            |            |            |             |            |            |     |
| Xenopus_Silurana_tropicalis |            |            |            |            |             |            |            |     |
| L_XT                        |            |            |            |            |             |            |            |     |
| Takifugu_rubripes           |            |            |            |            |             |            |            |     |
| Bos_taurus                  |            |            |            |            |             |            |            |     |
| Homo_sapiens                |            |            |            |            |             |            |            |     |
| Microcebus_murinus          |            |            |            |            |             |            |            |     |
| Myotis_lucifugus            |            |            |            |            |             |            |            |     |
| Equus_caballus              |            |            |            |            |             |            |            |     |
| Tupaia_belangeri            |            |            |            |            |             |            |            |     |
| Loxodonta_africana          |            |            |            |            |             |            |            |     |
| Murinae                     |            |            |            |            |             |            |            |     |
| Canis_lupus_familiaris      |            |            |            |            |             |            |            |     |
| Sus_scrofa                  |            |            |            |            |             |            |            |     |
| Choloepus_hoffmanni         |            |            |            |            |             |            |            |     |
| Vicugna_pacos               |            |            |            |            |             |            |            |     |
| Gavialis_gangeticus         |            |            |            |            |             |            |            |     |
| Mammalia                    |            |            |            |            |             |            |            |     |
| Passeroidea                 |            |            |            |            |             |            |            |     |
| Takifugu                    |            |            |            |            |             |            |            |     |
| Pteropus_vampyrus           |            |            |            |            |             |            |            |     |
| Ornithorhynchus             |            |            |            |            |             |            |            |     |
| Oryctolagus_cuniculus       |            |            |            |            |             |            |            |     |
| Gallus_gallus               |            |            |            |            |             |            |            |     |
| Homnidae                    |            |            |            |            |             |            |            |     |
| Metatheria                  |            |            |            |            |             |            |            |     |
| Rodentia                    |            |            |            |            |             |            |            |     |
| Monodelphis                 |            |            |            |            |             |            |            |     |
| Consensus                   |            |            |            |            |             |            |            |     |
| Conservation                | 100%       |            |            |            |             |            |            | 0%  |

|                             | 440        | 460        | 480        |            |            |             |              |     |
|-----------------------------|------------|------------|------------|------------|------------|-------------|--------------|-----|
| Dipodomys_ordii             |            |            |            |            |            |             |              |     |
| Laurasiatheria              |            |            |            |            |            |             |              |     |
| Eutheria                    |            |            |            |            |            |             |              |     |
| Tarsius_syrichta            |            |            |            |            |            |             |              |     |
| Muridae                     |            |            |            |            |            |             |              |     |
| Gasterosteus_aculeatus      |            |            |            |            |            |             |              |     |
| Felis_silvestris            |            |            |            |            |            |             |              |     |
| Rattus                      |            |            |            |            |            |             |              |     |
| Papio_hamadryas             |            |            |            |            |            |             |              |     |
| Pan_troglodytes             |            |            |            |            |            |             |              |     |
| Ailuropoda_melanoleuca      |            |            |            |            |            |             |              |     |
| Cavia_porcellus             |            |            |            |            |            |             |              |     |
| Ictidomys_tridecemlineatus  |            |            |            |            |            |             |              |     |
| Canis                       |            |            |            |            |            |             |              |     |
| Felis_catus                 |            |            |            |            |            |             |              |     |
| Ochotona_princeps           |            |            |            |            |            |             |              |     |
| Cercopithecidae             |            |            |            |            |            |             |              |     |
| Carnivora                   |            |            |            |            |            |             |              |     |
| Mus                         |            |            |            |            |            |             |              |     |
| Mus_musculus                |            |            |            |            |            |             |              |     |
| Rattus_norvegicus           |            |            |            |            |            |             |              |     |
| Tursiops_truncatus          |            |            |            |            |            |             |              |     |
| Procyon_capensis            |            |            |            |            |            |             |              |     |
| Primates                    |            |            |            |            |            |             |              |     |
| Echinops_telfairi           |            |            |            |            |            |             |              |     |
| Sorex_araneus               |            |            |            |            |            |             |              |     |
| Canidae                     |            |            |            |            |            |             |              |     |
| Otolemur_garnettii          |            |            |            |            |            |             |              |     |
| Gallus                      |            |            |            |            |            |             |              |     |
| Callithrix_jacchus          |            |            |            |            |            |             |              |     |
| Crocodylus_porosus          |            |            |            |            |            |             |              |     |
| Erinaceus_europaeus         |            |            |            |            |            |             |              |     |
| rnd-6_family-7426-LTR-ERV1  |            |            |            |            |            |             |              |     |
| Esox_lucius                 |            |            |            |            |            |             |              |     |
| Salmo_salar                 |            |            |            |            |            |             |              |     |
| Didelphidae                 |            |            |            |            |            |             |              |     |
| Latimeria_chalumnae         |            |            |            |            |            |             |              |     |
| Monodelphis_domestica       |            |            |            |            |            |             |              |     |
| Macropus_eugenii            |            |            |            |            |            |             |              |     |
| Alligator_mississippiensis  |            |            |            |            |            |             |              |     |
| Chrysemys_picta_bellii      |            |            |            |            |            |             |              |     |
| Danio_rerio                 |            |            |            |            |            |             |              |     |
| Taeniopygia                 |            |            |            |            |            |             |              |     |
| Dasybus_novemcinctus        |            |            |            |            |            |             |              |     |
| LTR_XT                      |            |            |            |            |            |             |              |     |
| Haplorrhini                 | GAGTGTGTGG | GTGCGTGTGA | ACCTACCCGG | GACACAAGGA | AGGCTTGTTT | CATCCGATGA  | GGT - GGGGTA | 489 |
| Catarrhini                  | GAGCGTCC-  | -CGGGTAGGC | AATTGCCCCG | GTGGAACGCC | TGCCCAGAGC | AGCGCGTGGC  | AGG - CCCCCG | 197 |
| Anolis_carolinensis         |            |            |            |            |            |             |              |     |
| Murine_leukemia_virus       | CGGGAGGTAA | GCTGGCCAGC | GATCGTTTCG | TNNNGNCNC  | NNNCNTNNG  | CNTNTGNNNG  | CNNGCNGNNN   | 126 |
| Phascolarctos_cinereus      | CGGGAGGTAA | GCTGGCCAGC | GATCGTCTA  | TGTTCTCTCT | GTGTCTGAC- | - - TCCGAAA | CTC - TGACTG | 121 |
| Estrildidae                 |            |            |            |            |            |             |              |     |
| Xenopus_Silurana_tropicalis |            |            |            |            |            |             |              |     |
| L_XT                        |            |            |            |            |            |             |              |     |
| Takifugu_rubripes           |            |            |            |            |            |             |              |     |
| Bos_taurus                  |            |            |            |            |            |             |              |     |
| Homo_sapiens                |            |            |            |            |            |             |              |     |
| Microcebus_murinus          |            |            |            |            |            |             |              |     |
| Myotis_lucifugus            |            |            |            |            |            |             |              |     |
| Equus_caballus              |            |            |            |            |            |             |              |     |
| Tupaia_belangeri            |            |            |            |            |            |             |              |     |
| Loxodonta_africana          |            |            |            |            |            |             |              |     |
| Murinae                     |            |            |            |            |            |             |              |     |
| Canis_lupus_familiaris      |            |            |            |            |            |             |              |     |
| Sus_scrofa                  |            |            |            |            |            |             |              |     |
| Choloepus_hoffmanni         |            |            |            |            |            |             |              |     |
| Vicugna_pacos               |            |            |            |            |            |             |              |     |
| Gavialis_gangeticus         |            |            |            |            |            |             |              |     |
| Mammalia                    |            |            |            |            |            |             |              |     |
| Passeroidea                 |            |            |            |            |            |             |              |     |
| Takifugu                    |            |            |            |            |            |             |              |     |
| Pteropus_vampyrus           |            |            |            |            |            |             |              |     |
| Ornithorhynchus             |            |            |            |            |            |             |              |     |
| Oryctolagus_cuniculus       |            |            |            |            |            |             |              |     |
| Gallus_gallus               |            |            |            |            |            |             |              |     |
| Hominidae                   |            |            |            |            |            |             |              |     |
| Metatheria                  |            |            |            |            |            |             |              |     |
| Rodentia                    |            |            |            |            |            |             |              |     |
| Monodelphis                 |            |            |            |            |            |             |              |     |
| Consensus                   |            |            |            |            |            |             |              |     |
| Conservation                | 100%       |            |            |            |            |             |              |     |
|                             | 0%         |            |            |            |            |             |              |     |

|                             | 500        | 520                | 540        | 560        |            |            |            |     |
|-----------------------------|------------|--------------------|------------|------------|------------|------------|------------|-----|
| Dipodomys_ordii             | -          | -                  | -          | -          | -          |            |            |     |
| Laurasiatheria              | -          | -                  | -          | -          | -          |            |            |     |
| Eutheria                    | -          | -                  | -          | -          | -          |            |            |     |
| Tarsius_syricha             | -          | -                  | -          | -          | -          |            |            |     |
| Muridae                     | -          | -                  | -          | -          | -          |            |            |     |
| Gasterosteus_aculeatus      | -          | -                  | -          | -          | -          |            |            |     |
| Felis_silvestris            | -          | -                  | -          | -          | -          |            |            |     |
| Rattus                      | -          | -                  | -          | -          | -          |            |            |     |
| Papio_hamadryas             | -          | -                  | -          | -          | -          |            |            |     |
| Pan_troglodytes             | -          | -                  | -          | -          | -          |            |            |     |
| Ailuropoda_melanoleuca      | -          | -                  | -          | -          | -          |            |            |     |
| Cavia_porcellus             | -          | -                  | -          | -          | -          |            |            |     |
| Ictidomys_tridecemlineatus  | -          | -                  | -          | -          | -          |            |            |     |
| Canis                       | -          | -                  | -          | -          | -          |            |            |     |
| Felis_catus                 | -          | -                  | -          | -          | -          |            |            |     |
| Ochotona_princeps           | -          | -                  | -          | -          | -          |            |            |     |
| Cercopithecidae             | -          | -                  | -          | -          | -          |            |            |     |
| Carnivora                   | -          | -                  | -          | -          | -          |            |            |     |
| Mus                         | -          | -                  | -          | -          | -          |            |            |     |
| Mus_musculus                | -          | -                  | -          | -          | -          |            |            |     |
| Rattus_norvegicus           | -          | -                  | -          | -          | -          |            |            |     |
| Tursiops_truncatus          | -          | -                  | -          | -          | -          |            |            |     |
| Procapra_capensis           | -          | -                  | -          | -          | -          |            |            |     |
| Primates                    | -          | -                  | -          | -          | -          |            |            |     |
| Echinops_telfairi           | -          | -                  | -          | -          | -          |            |            |     |
| Sorex_araneus               | -          | -                  | -          | -          | -          |            |            |     |
| Canidae                     | -          | -                  | -          | -          | -          |            |            |     |
| Otomomys_garnettii          | -          | -                  | -          | -          | -          |            |            |     |
| Gallus                      | -          | -                  | -          | -          | -          |            |            |     |
| Callithrix_jacchus          | -          | -                  | -          | -          | -          |            |            |     |
| Crocodylus_porosus          | -          | -                  | -          | -          | -          |            |            |     |
| Erinaceus_europaeus         | -          | -                  | -          | -          | -          |            |            |     |
| rnd-6_family-7426-LTR-ERV1  | -          | -                  | -          | -          | -          |            |            |     |
| Esox_lucius                 | -          | -                  | -          | -          | -          |            |            |     |
| Salmo_salar                 | -          | -                  | -          | -          | -          |            |            |     |
| Didelphidae                 | -          | -                  | -          | -          | -          |            |            |     |
| Latimeria_chalumnae         | -          | -                  | -          | -          | -          |            |            |     |
| Monodelphis_domestica       | -          | -                  | -          | -          | -          |            |            |     |
| Macropus_eugenii            | -          | -                  | -          | -          | -          |            |            |     |
| Alligator_mississippiensis  | -          | -                  | -          | -          | -          |            |            |     |
| Chrysemys_picta_bellii      | -          | -                  | -          | -          | -          |            |            |     |
| Danio_rerio                 | -          | -                  | -          | -          | -          |            |            |     |
| Taeniopygia                 | -          | -                  | -          | -          | -          |            |            |     |
| Dasyus_novemcinctus         | -          | -                  | -          | -          | -          |            |            |     |
| LTR_XT                      | -          | -                  | -          | -          | -          |            |            |     |
| Haplorrhini                 | GGAGTGGTGT | GTGTATGTGT         | GTGAATGTGG | GAGCCTAACT | AG-GCTCACC | CGGGACACGA | GAGAGGCTCG | 558 |
| Catarrhini                  | TGGAGGATCA | ACGCA-GTGG         | CTGAACACCG | GGAAGGAACT | GGCACTTGGA | GTCCGGACAN | CTGAAACTTG | 266 |
| Anolis_carolinensis         | -          | -                  | -          | -          | -          | -          | -          | -   |
| Murine_leukemia_virus       | TNNNNNCNTT | NNGCNGGCGN         | NTGAANNNGT | ACNAGTTAGC | TN-ACTAGAT | CTGTNNNNNN | NGGTNNCNGG | 195 |
| Phascolarctos_cinereus      | TCTATTCGGT | GTGCGCGCAT         | TT---TTGGT | TTATTCGGG  | TT-A----AT | CGATCTAAGA | TCGAGGCGTG | 183 |
| Estrildidae                 | -          | -                  | -          | -          | -          | -          | -          | -   |
| Xenopus_Silurana_tropicalis | -          | -                  | -          | -          | -          | -          | -          | -   |
| L_XT                        | -          | -                  | -          | -          | -          | -          | -          | -   |
| Takifugu_rubripes           | -          | -                  | -          | -          | -          | -          | -          | -   |
| Bos_taurus                  | -          | -                  | -          | -          | -          | -          | -          | -   |
| Homo_sapiens                | -          | -                  | -          | -          | -          | -          | -          | -   |
| Microcebus_murinus          | -          | -                  | -          | -          | -          | -          | -          | -   |
| Myotis_lucifugus            | -          | -                  | -          | -          | -          | -          | -          | -   |
| Equus_caballus              | -          | -                  | -          | -          | -          | -          | -          | -   |
| Tupaia_belangeri            | -          | -                  | -          | -          | -          | -          | -          | -   |
| Loxodonta_africana          | -          | -                  | -          | -          | -          | -          | -          | -   |
| Murinae                     | -          | -                  | -          | -          | -          | -          | -          | -   |
| Canis_lupus_familiaris      | -          | -                  | -          | -          | -          | -          | -          | -   |
| Sus_scrofa                  | -          | -                  | -          | -          | -          | -          | -          | -   |
| Choloepus_hoffmanni         | -          | -                  | -          | -          | -          | -          | -          | -   |
| Vicugna_pacos               | -          | -                  | -          | -          | -          | -          | -          | -   |
| Gavialis_gangeticus         | -          | -                  | -          | -          | -          | -          | -          | -   |
| Mammalia                    | -          | -                  | -          | -          | -          | -          | -          | -   |
| Passeroidea                 | -          | -                  | -          | -          | -          | -          | -          | -   |
| Takifugu                    | -          | -                  | -          | -          | -          | -          | -          | -   |
| Pteropus_vampyrus           | -          | -                  | -          | -          | -          | -          | -          | -   |
| Ornithorhynchus             | -          | -                  | -          | -          | -          | -          | -          | -   |
| Oryctolagus_cuniculus       | -          | -                  | -          | -          | -          | -          | -          | -   |
| Gallus_gallus               | -          | -                  | -          | -          | -          | -          | -          | -   |
| Hominidae                   | -          | -                  | -          | -          | -          | -          | -          | -   |
| Metatheria                  | -          | -                  | -          | -          | -          | -          | -          | -   |
| Rodentia                    | -          | -                  | -          | -          | -          | -          | -          | -   |
| Monodelphis                 | -          | -                  | -          | -          | -          | -          | -          | -   |
| Consensus                   | -          | -                  | -          | -          | -          | -          | -          | -   |
| Conservation                | 100%       | [Conservation bar] |            |            |            |            |            | 0%  |

|                             | 580        | 600        | 620        |            |            |            |            |     |
|-----------------------------|------------|------------|------------|------------|------------|------------|------------|-----|
| Dipodomys_ordii             |            |            |            |            |            |            |            |     |
| Laurasiatheria              |            |            |            |            |            |            |            |     |
| Eutheria                    |            |            |            |            |            |            |            |     |
| Tarsius_syricha             |            |            |            |            |            |            |            |     |
| Muridae                     |            |            |            |            |            |            |            |     |
| Gasterosteus_aculeatus      |            |            |            |            |            |            |            |     |
| Felis_silvestris            |            |            |            |            |            |            |            |     |
| Rattus                      |            |            |            |            |            |            |            |     |
| Papio_hamadryas             |            |            |            |            |            |            |            |     |
| Pan_troglodytes             |            |            |            |            |            |            |            |     |
| Ailuropoda_melanoleuca      |            |            |            |            |            |            |            |     |
| Cavia_porcellus             |            |            |            |            |            |            |            |     |
| Ictidomys_tridecemlineatus  |            |            |            |            |            |            |            |     |
| Canis                       |            |            |            |            |            |            |            |     |
| Felis_catus                 |            |            |            |            |            |            |            |     |
| Ochotona_princeps           |            |            |            |            |            |            |            |     |
| Cercopithecidae             |            |            |            |            |            |            |            |     |
| Carnivora                   |            |            |            |            |            |            |            |     |
| Mus                         |            |            |            |            |            |            |            |     |
| Mus_musculus                |            |            |            |            |            |            |            |     |
| Rattus_norvegicus           |            |            |            |            |            |            |            |     |
| Tursiops_truncatus          |            |            |            |            |            |            |            |     |
| Procapra_capensis           |            |            |            |            |            |            |            |     |
| Primates                    |            |            |            |            |            |            |            |     |
| Echinops_telfairi           |            |            |            |            |            |            |            |     |
| Sorex_araneus               |            |            |            |            |            |            |            |     |
| Canidae                     |            |            |            |            |            |            |            |     |
| Otomomys_garnettii          |            |            |            |            |            |            |            |     |
| Gallus                      |            |            |            |            |            |            |            |     |
| Callithrix_jacchus          |            |            |            |            |            |            |            |     |
| Crocodylus_porosus          |            |            |            |            |            |            |            |     |
| Erinaceus_europaeus         |            |            |            |            |            |            |            |     |
| rnd-6_family-7426-LTR-ERV1  |            |            |            |            |            |            |            |     |
| Esox_lucius                 |            |            |            |            |            |            |            |     |
| Salmo_salar                 |            |            |            |            |            |            |            |     |
| Didelphidae                 |            |            |            |            |            |            |            |     |
| Latimeria_chalumnae         |            |            |            |            |            |            |            |     |
| Monodelphis_domestica       |            |            |            |            |            |            |            |     |
| Macropus_eugenii            |            |            |            |            |            |            |            |     |
| Alligator_mississippiensis  |            |            |            |            |            |            |            |     |
| Chrysemys_picta_bellii      |            |            |            |            |            |            |            |     |
| Danio_rerio                 |            |            |            |            |            |            |            |     |
| Taeniopygia                 |            |            |            |            |            |            |            |     |
| Dasyus_novemcinctus         |            |            |            |            |            |            |            |     |
| LTR_XT                      |            |            |            |            |            |            |            |     |
| Haplorrhini                 | TTTCATCTGA | TGAGGAGTCC | TGGGGCAGGG | GAGGTGTGTG | AAAGTGTGTG | AAAGAGATGG | TCTCGGGAGA | 628 |
| Catarrhini                  | GTAAGACTAG | TCTTTGGAAC | TTGCCCACTC | CATTTGAGTG | GAAGCGTG-- | -GCCTGATCA | CC-CACGGCG | 332 |
| Anolis_carolinensis         |            |            |            |            |            |            |            |     |
| Murine_leukemia_virus       | GAAGNANTNN | NNANNNNTA  | NNNCNGNNCN | NANCNNGN   | AGNNGNCNNA | NAGGANATCN | GN-GGNCAN  | 264 |
| Phascolarctos_cinereus      | --AGTAGCGG | ACAGACGT-G | TTCGGGGGCT | CACCGC--CC | GGCAATCCTG | GGAGACGTCC | CA-GGATCAG | 247 |
| Estrildidae                 |            |            |            |            |            |            |            |     |
| Xenopus_Silurana_tropicalis |            |            |            |            |            |            |            |     |
| LTR_XT                      | GCATATTTTG | AAAATAAATT | GATTAATCTT | ATATTGTCTT | ATGAACAATG | TATGAANCAA | NTATTANTNG | 109 |
| Takifugu_rubripes           |            |            |            |            |            |            |            |     |
| Bos_taurus                  |            |            |            |            |            |            |            |     |
| Homo_sapiens                |            |            |            |            |            |            |            |     |
| Microcebus_murinus          |            |            |            |            |            |            |            |     |
| Myotis_lucifugus            |            |            |            |            |            |            |            |     |
| Equus_caballus              |            |            |            |            |            |            |            |     |
| Tupaia_belangeri            |            |            |            |            |            |            |            |     |
| Loxodonta_africana          |            |            |            |            |            |            |            |     |
| Murinae                     |            |            |            |            |            |            |            |     |
| Canis_lupus_familiaris      |            |            |            |            |            |            |            |     |
| Sus_scrofa                  |            |            |            |            |            |            |            |     |
| Choloepus_hoffmanni         |            |            |            |            |            |            |            |     |
| Vicugna_pacos               |            |            |            |            |            |            |            |     |
| Gavialis_gangeticus         |            |            |            |            |            |            |            |     |
| Mammalia                    |            |            |            |            |            |            |            |     |
| Passeroidea                 |            |            |            |            |            |            |            |     |
| Takifugu                    |            |            |            |            |            |            |            |     |
| Pteropus_vampyrus           |            |            |            |            |            |            |            |     |
| Ornithorhynchus             |            |            |            |            |            |            |            |     |
| Oryctolagus_cuniculus       |            |            |            |            |            |            |            |     |
| Gallus_gallus               |            |            |            |            |            |            |            |     |
| Hominidae                   |            |            |            |            |            |            |            |     |
| Metatheria                  |            |            |            |            |            |            |            |     |
| Rodentia                    |            |            |            |            |            |            |            |     |
| Monodelphis                 |            |            |            |            |            |            |            |     |
| Consensus                   |            |            |            |            |            |            |            |     |
| Conservation                | 100%       |            |            |            |            |            |            | 0%  |

|                             | 640        | 660        | 680        | 700         |            |             |            |     |
|-----------------------------|------------|------------|------------|-------------|------------|-------------|------------|-----|
| Dipodomys_ordii             | -          | -          | -          | -           | -          |             |            |     |
| Laurasiatheria              | -          | -          | -          | -           | -          |             |            |     |
| Eutheria                    | -          | -          | -          | -           | -          |             |            |     |
| Tarsius_syrichta            | -          | -          | -          | -           | -          |             |            |     |
| Muridae                     | -          | -          | -          | -           | -          |             |            |     |
| Gasterosteus_aculeatus      | -          | -          | -          | -           | -          |             |            |     |
| Felis_silvestris            | -          | -          | -          | -           | -          |             |            |     |
| Rattus                      | -          | -          | -          | -           | -          |             |            |     |
| Papio_hamadryas             | -          | -          | -          | -           | -          |             |            |     |
| Pan_troglodytes             | -          | -          | -          | -           | -          |             |            |     |
| Ailuropoda_melanoleuca      | -          | -          | -          | -           | -          |             |            |     |
| Cavia_porcellus             | -          | -          | -          | -           | -          |             |            |     |
| Ictidomys_tridecemlineatus  | -          | -          | -          | -           | -          |             |            |     |
| Canis                       | -          | -          | -          | -           | -          |             |            |     |
| Felis_catus                 | -          | -          | -          | -           | -          |             |            |     |
| Ochotona_princeps           | -          | -          | -          | -           | -          |             |            |     |
| Cercopithecidae             | -          | -          | -          | -           | -          |             |            |     |
| Carnivora                   | -          | -          | -          | -           | -          |             |            |     |
| Mus                         | -          | -          | -          | -           | -          |             |            |     |
| Mus_musculus                | -          | -          | -          | -           | -          |             |            |     |
| Rattus_norvegicus           | -          | -          | -          | -           | -          |             |            |     |
| Tursiops_truncatus          | -          | -          | -          | -           | -          |             |            |     |
| Procapra_capensis           | -          | -          | -          | -           | -          |             |            |     |
| Primates                    | -          | -          | -          | -           | -          |             |            |     |
| Echinops_telfairi           | -          | -          | -          | -           | -          |             |            |     |
| Sorex_araneus               | -          | -          | -          | -           | -          |             |            |     |
| Canidae                     | -          | -          | -          | -           | -          |             |            |     |
| Otomomys_garnettii          | -          | -          | -          | -           | -          |             |            |     |
| Gallus                      | -          | -          | -          | -           | -          |             |            |     |
| Callithrix_jacchus          | -          | -          | -          | -           | -          |             |            |     |
| Crocodylus_porosus          | -          | -          | -          | -           | -          |             |            |     |
| Erinaceus_europaeus         | -          | -          | -          | -           | -          |             |            |     |
| rnd-6_family-7426-LTR-ERV1  | -          | -          | -          | -           | -          |             |            |     |
| Esox_lucius                 | -          | -          | -          | -           | -          |             |            |     |
| Salmo_salar                 | -          | -          | -          | -           | -          |             |            |     |
| Didelphidae                 | -          | -          | -          | -           | -          |             |            |     |
| Latimeria_chalumnae         | -          | -          | -          | -           | -          |             |            |     |
| Monodelphis_domestica       | -          | -          | -          | -           | -          |             |            |     |
| Macropus_eugenii            | -          | -          | -          | -           | -          |             |            |     |
| Alligator_mississippiensis  | -          | -          | -          | -           | -          |             |            |     |
| Chrysemys_picta_bellii      | -          | -          | -          | -           | -          |             |            |     |
| Danio_rerio                 | -          | -          | -          | -           | -          |             |            |     |
| Taeniopygia                 | -          | -          | -          | -           | -          |             |            |     |
| Dasyus_novemcinctus         | -          | -          | -          | -           | -          |             |            |     |
| LTR_XT                      | -          | -          | -          | -           | -          |             |            |     |
| Haplorrhini                 | GGCCAATGCG | GGGAGTGATG | TGGGGAGGTG | CAGATCTCTT  | AGCGCAGACT | GTGTCTCTCCG | AGGCGAGTGT | 698 |
| Catarrhini                  | TGCTGTACC  | GGCACT---- | TTGGTTTTTG | TTTTCGACTT  | GACTTGGATT | GCTTGATACT  | T--TGGTTTT | 396 |
| Anolis_carolinensis         | -          | -          | -          | -           | -          | -           | -          | -   |
| Murine_leukemia_virus       | NGCNTGGNCC | NNNNCANN   | NCCNANCANN | NNANCNGTNN  | NNGANNANNT | GGAGCCCCNN  | CTNNGGNNA  | 334 |
| Phascolarctos_cinereus      | GG-GAGGACC | AGGG---ACG | CCTGGTGGAT | CCCACGGCAA  | GGGATAATT- | -----CTC    | CTCTGATCT- | 304 |
| Estrildidae                 | -          | -          | -          | -           | -          | -           | -          | -   |
| Xenopus_Silurana_tropicalis | -          | -          | -          | -           | -          | -           | -          | -   |
| LTR_XT                      | NCTTAAAGTT | TGTGTNTGTA | AACANAAANA | NGTAAANATTC | TGTNTATNTT | AAGATNGTAN  | AGNNTTTTAA | 179 |
| Takifugu_rubripes           | -          | -          | -          | -           | -          | -           | -          | -   |
| Bos_taurus                  | -          | -          | -          | -           | -          | -           | -          | -   |
| Homo_sapiens                | -          | -          | -          | -           | -          | -           | -          | -   |
| Microcebus_murinus          | -          | -          | -          | -           | -          | -           | -          | -   |
| Myotis_lucifugus            | -          | -          | -          | -           | -          | -           | -          | -   |
| Equus_caballus              | -          | -          | -          | -           | -          | -           | -          | -   |
| Tupaia_belangeri            | -          | -          | -          | -           | -          | -           | -          | -   |
| Loxodonta_africana          | -          | -          | -          | -           | -          | -           | -          | -   |
| Murinae                     | -          | -          | -          | -           | -          | -           | -          | -   |
| Canis_lupus_familiaris      | -          | -          | -          | -           | -          | -           | -          | -   |
| Sus_scrofa                  | -          | -          | -          | -           | -          | -           | -          | -   |
| Choloepus_hoffmanni         | -          | -          | -          | -           | -          | -           | -          | -   |
| Vicugna_pacos               | -          | -          | -          | -           | -          | -           | -          | -   |
| Gavialis_gangeticus         | -          | -          | -          | -           | -          | -           | -          | -   |
| Mammalia                    | -          | -          | -          | -           | -          | -           | -          | -   |
| Passeroidea                 | -          | -          | -          | -           | -          | -           | -          | -   |
| Takifugu                    | -          | -          | -          | -           | -          | -           | -          | -   |
| Pteropus_vampyrus           | -          | -          | -          | -           | -          | -           | -          | -   |
| Ornithorhynchus             | -          | -          | -          | -           | -          | -           | -          | -   |
| Oryctolagus_cuniculus       | -          | -          | -          | -           | -          | -           | -          | -   |
| Gallus_gallus               | -          | -          | -          | -           | -          | -           | -          | -   |
| Hominidae                   | -          | -          | -          | -           | -          | -           | -          | -   |
| Metatheria                  | -          | -          | -          | -           | -          | -           | -          | -   |
| Rodentia                    | -          | -          | -          | -           | -          | -           | -          | -   |
| Monodelphis                 | -          | -          | -          | -           | -          | -           | -          | -   |
| Consensus                   | -          | -          | -          | -           | -          | -           | -          | -   |
| Conservation                | 100%       |            |            |             |            |             |            | 0%  |

|                             | 720        | 740        | 760        |            |            |            |            |     |
|-----------------------------|------------|------------|------------|------------|------------|------------|------------|-----|
| Dipodomys_ordii             |            |            |            |            |            |            |            |     |
| Laurasiatheria              |            |            |            |            |            |            |            |     |
| Eutheria                    |            |            |            |            |            |            |            |     |
| Tarsius_syricha             |            |            |            |            |            |            |            |     |
| Muridae                     |            |            |            |            |            |            |            |     |
| Gasterosteus_aculeatus      |            |            |            |            |            |            |            |     |
| Felis_silvestris            |            |            |            |            |            |            |            |     |
| Rattus                      |            |            |            |            |            |            |            |     |
| Papio_hamadryas             |            |            |            |            |            |            |            |     |
| Pan_troglodytes             |            |            |            |            |            |            |            |     |
| Ailuropoda_melanoleuca      |            |            |            |            |            |            |            |     |
| Cavia_porcellus             |            |            |            |            |            |            |            |     |
| Ictidomys_tridecemlineatus  |            |            |            |            |            |            |            |     |
| Canis                       |            |            |            |            |            |            |            |     |
| Felis_catus                 |            |            |            |            |            |            |            |     |
| Ochotona_princeps           |            |            |            |            |            |            |            |     |
| Cercopithecidae             |            |            |            |            |            |            |            |     |
| Carnivora                   |            |            |            |            |            |            |            |     |
| Mus                         |            |            |            |            |            |            |            |     |
| Mus_musculus                |            |            |            |            |            |            |            |     |
| Rattus_norvegicus           |            |            |            |            |            |            |            |     |
| Tursiops_truncatus          |            |            |            |            |            |            |            |     |
| Procapra_capensis           |            |            |            |            |            |            |            |     |
| Primates                    |            |            |            |            |            |            |            |     |
| Echinops_telfairi           |            |            |            |            |            |            |            |     |
| Sorex_araneus               |            |            |            |            |            |            |            |     |
| Canidae                     |            |            |            |            |            |            |            |     |
| Otolemur_garnettii          |            |            |            |            |            |            |            |     |
| Gallus                      |            |            |            |            |            |            |            |     |
| Callithrix_jacchus          |            |            |            |            |            |            |            |     |
| Crocodylus_porosus          |            |            |            |            |            |            |            |     |
| Erinaceus_europaeus         |            |            |            |            |            |            |            |     |
| rnd-6_family-7426-LTR-ERV1  |            |            |            |            |            |            |            |     |
| Esox_lucius                 |            |            |            |            |            |            |            |     |
| Salmo_salar                 |            |            |            |            |            |            |            |     |
| Didelphidae                 |            |            |            |            |            |            |            |     |
| Latimeria_chalumnae         |            |            |            |            |            |            |            |     |
| Monodelphis_domestica       |            |            |            |            |            |            |            |     |
| Macropus_eugenii            |            |            |            |            |            |            |            |     |
| Alligator_mississippiensis  |            |            |            |            |            |            |            |     |
| Chrysemys_picta_bellii      |            |            |            |            |            |            |            |     |
| Danio_rerio                 |            |            |            |            |            |            |            |     |
| Taeniopygia                 |            |            |            |            |            |            |            |     |
| Dasybus_novemcinctus        |            |            |            |            |            |            |            |     |
| LTR_XT                      |            |            |            |            |            |            |            |     |
| Haplorrhini                 | GGGACGAGCC | AGACCTAGGT | CACTGCGTAA | GGCCGACAGG | ATTAGCTTCA | TAGCTTCACA | GCAGTAGTTG | 768 |
| Catarrhini                  | GGTTTTGACC | TGGCTTGGAT | TTCT-CGATA | CTCTGAT--- | TTTGGTTTT- | --GATTC--- | ----TGGTTT | 452 |
| Anolis_carolinensis         |            |            |            |            |            |            |            |     |
| Murine_leukemia_virus       | NGNNNANNTG | GTNCTCNNNN | NANGCGANNG | GCCCNAGCNN | NGNNTCNNN  | NANNTNNNNN | NTNNNTTTCN | 404 |
| Phascolarctos_cinereus      | --CACAGTTG | --CACTGTCT | TGAGAGACAT | ACCCTACCTT | CTGACTCTTT | TTCTGTCTTT | TTTAATATAC | 370 |
| Estrildidae                 |            |            |            |            |            |            |            |     |
| Xenopus_Silurana_tropicalis |            |            |            |            |            |            |            |     |
| L_XT                        | NACTATGATN | NACANANANT | GTTTTNNNCA | GANTNNTTGN | AATCTNATNN | ACANAATAAA | GACACAGAAT | 249 |
| Takifugu_rubripes           |            |            |            |            |            |            |            |     |
| Bos_taurus                  |            |            |            |            |            |            |            |     |
| Homo_sapiens                |            |            |            |            |            |            |            |     |
| Microcebus_murinus          |            |            |            |            |            |            |            |     |
| Myotis_lucifugus            |            |            |            |            |            |            |            |     |
| Equus_caballus              |            |            |            |            |            |            |            |     |
| Tupaia_belangeri            |            |            |            |            |            |            |            |     |
| Loxodonta_africana          |            |            |            |            |            |            |            |     |
| Murinae                     |            |            |            |            |            |            |            |     |
| Canis_lupus_familiaris      |            |            |            |            |            |            |            |     |
| Sus_scrofa                  |            |            |            |            |            |            |            |     |
| Choloepus_hoffmanni         |            |            |            |            |            |            |            |     |
| Vicugna_pacos               |            |            |            |            |            |            |            |     |
| Gavialis_gangeticus         |            |            |            |            |            |            |            |     |
| Mammalia                    |            |            |            |            |            |            |            |     |
| Passeroidea                 |            |            |            |            |            |            |            |     |
| Takifugu                    |            |            |            |            |            |            |            |     |
| Pteropus_vampyrus           |            |            |            |            |            |            |            |     |
| Ornithorhynchus             |            |            |            |            |            |            |            |     |
| Oryctolagus_cuniculus       |            |            |            |            |            |            |            |     |
| Gallus_gallus               |            |            |            |            |            |            |            |     |
| Hominidae                   |            |            |            |            |            |            |            |     |
| Metatheria                  |            |            |            |            |            |            |            |     |
| Rodentia                    |            |            |            |            |            |            |            |     |
| Monodelphis                 |            |            |            |            |            |            |            |     |
| Consensus                   |            |            |            |            |            |            |            |     |
| Conservation                | 100%       |            |            |            |            |            |            |     |
|                             | 0%         |            |            |            |            |            |            |     |

|                             | 780          | 800           | 820        | 840         |            |              |             |     |
|-----------------------------|--------------|---------------|------------|-------------|------------|--------------|-------------|-----|
| Dipodomys_ordii             |              |               |            |             |            |              |             |     |
| Laurasiatheria              |              |               |            |             |            |              |             |     |
| Eutheria                    |              |               |            |             |            |              |             |     |
| Tarsius_syrichta            |              |               |            |             |            |              |             |     |
| Muridae                     |              |               |            |             |            |              |             |     |
| Gasterosteus_aculeatus      |              |               |            |             |            |              |             |     |
| Felis_silvestris            |              |               |            |             |            |              |             |     |
| Rattus                      |              |               |            |             |            |              |             |     |
| Papio_hamadryas             |              |               |            |             |            |              |             |     |
| Pan_troglodytes             |              |               |            |             |            |              |             |     |
| Ailuropoda_melanoleuca      |              |               |            |             |            |              |             |     |
| Cavia_porcellus             |              |               |            |             |            |              |             |     |
| Ictidomys_tridecemlineatus  |              |               |            |             |            |              |             |     |
| Canis                       |              |               |            |             |            |              |             |     |
| Felis_catus                 |              |               |            |             |            |              |             |     |
| Ochotona_princeps           |              |               |            |             |            |              |             |     |
| Cercopithecidae             |              |               |            |             |            |              |             |     |
| Carnivora                   |              |               |            |             |            |              |             |     |
| Mus                         |              |               |            |             |            |              |             |     |
| Mus_musculus                |              |               |            |             |            |              |             |     |
| Rattus_norvegicus           |              |               |            |             |            |              |             |     |
| Tursiops_truncatus          |              |               |            |             |            |              |             |     |
| Procapra_capensis           |              |               |            |             |            |              |             |     |
| Primates                    |              |               |            |             |            |              |             |     |
| Echinops_telfairi           |              |               |            |             |            |              |             |     |
| Sorex_araneus               |              |               |            |             |            |              |             |     |
| Canidae                     |              |               |            |             |            |              |             |     |
| Otomomys_garnettii          |              |               |            |             |            |              |             |     |
| Gallus                      |              |               |            |             |            |              |             |     |
| Callithrix_jacchus          |              |               |            |             |            |              |             |     |
| Crocodylus_porosus          |              |               |            |             |            |              |             |     |
| Erinaceus_europaeus         |              |               |            |             |            |              |             |     |
| rnd-6_family-7426-LTR-ERV1  |              |               |            |             |            |              |             |     |
| Esox_lucius                 |              |               |            |             |            |              |             |     |
| Salmo_salar                 |              |               |            |             |            |              |             |     |
| Didelphidae                 |              |               |            |             |            |              |             |     |
| Latimeria_chalumnae         |              |               |            |             |            |              |             |     |
| Monodelphis_domestica       |              |               |            |             |            |              |             |     |
| Macropus_eugenii            |              |               |            |             |            |              |             |     |
| Alligator_mississippiensis  |              |               |            |             |            |              |             |     |
| Chrysemys_picta_bellii      |              |               |            |             |            |              |             |     |
| Danio_rerio                 |              |               |            |             |            |              |             |     |
| Taeniopygia                 |              |               |            |             |            |              |             |     |
| Dasyus_novemcinctus         |              |               |            |             |            |              |             |     |
| LTR_XT                      |              |               |            |             |            |              |             |     |
| Haplorrhini                 | GCTGTGACCT   | GGCCAAGCAG    | CATCCGAACC | TCCCCTAATA  | GGACCCGGTC | TGGTGAATCC   | GAGAGTGAAA  | 838 |
| Catarrhini                  | GGTGTAACCT   | GTAAGAAGT - G | TGTGTGTGCC | CTTTTACCC   | GTTCTTTGTT | TTGTGG - TGT | GCGTGTGGT - | 519 |
| Anolis_carolinensis         |              |               |            |             |            |              |             |     |
| Murine_leukemia_virus       | GNTTNN - CNN | NNANACCGNG    | NNNNNCNNCN | NGNCTNNNTN  | ANTNNTNNNN | NNTCANNNTN   | CTNNTCGNTN  | 473 |
| Phascolarctos_cinereus      | GTCTACGCCG   | CCATATAATT    | TTTTTCCTTT | TTATTTCAAT  | AATAATCATT | ATCTGGGTCG   | TAATTCCT    | 440 |
| Estrildidae                 |              |               |            |             |            |              |             |     |
| Xenopus_Silurana_tropicalis |              |               |            |             |            |              |             |     |
| LTR_XT                      | TANTGNAANT   | AATGNATNNC    | TNTNACTGTG | ANATCNATAAT | GAAACATATT | NTAGNATNAG   | NGNNGCANAT  | 319 |
| Takifugu_rubripes           |              |               |            |             |            |              |             |     |
| Bos_taurus                  |              |               |            |             |            |              |             |     |
| Homo_sapiens                |              |               |            |             |            |              |             |     |
| Microcebus_murinus          |              |               |            |             |            |              |             |     |
| Myotis_lucifugus            |              |               |            |             |            |              |             |     |
| Equus_caballus              |              |               |            |             |            |              |             |     |
| Tupaia_belangeri            |              |               |            |             |            |              |             |     |
| Loxodonta_africana          |              |               |            |             |            |              |             |     |
| Murinae                     |              |               |            |             |            |              |             |     |
| Canis_lupus_familiaris      |              |               |            |             |            |              |             |     |
| Sus_scrofa                  |              |               |            |             |            |              |             |     |
| Choloepus_hoffmanni         |              |               |            |             |            |              |             |     |
| Vicugna_pacos               |              |               |            |             |            |              |             |     |
| Gavialis_gangeticus         |              |               |            |             |            |              |             |     |
| Mammalia                    |              |               |            |             |            |              |             |     |
| Passeroidea                 |              |               |            |             |            |              |             |     |
| Takifugu                    |              |               |            |             |            |              |             |     |
| Pteropus_vampyrus           |              |               |            |             |            |              |             |     |
| Ornithorhynchus             |              |               |            |             |            |              |             |     |
| Oryctolagus_cuniculus       |              |               |            |             |            |              |             |     |
| Gallus_gallus               |              |               |            |             |            |              |             |     |
| Hominidae                   |              |               |            |             |            |              |             |     |
| Metatheria                  |              |               |            |             |            |              |             |     |
| Rodentia                    |              |               |            |             |            |              |             |     |
| Monodelphis                 |              |               |            |             |            |              |             |     |
| Consensus                   |              |               |            |             |            |              |             |     |
| Conservation                | 100%         |               |            |             |            |              |             | 0%  |



|                             | 860        |            | 880        |            | 900        |            |            |     |
|-----------------------------|------------|------------|------------|------------|------------|------------|------------|-----|
| Dipodomys_ordii             |            |            |            |            |            |            |            |     |
| Laurasiatheria              |            |            |            |            |            |            |            |     |
| Eutheria                    |            |            |            |            |            |            |            |     |
| Tarsius_syrichta            |            |            |            |            |            |            |            |     |
| Muridae                     |            |            |            |            |            |            |            |     |
| Gasterosteus_aculeatus      |            |            |            |            |            |            |            |     |
| Felis_silvestris            |            |            |            |            |            |            |            |     |
| Rattus                      |            |            |            |            |            |            |            |     |
| Papio_hamadryas             |            |            |            |            |            |            |            |     |
| Pan_troglodytes             |            |            |            |            |            |            |            |     |
| Ailuropoda_melanoleuca      |            |            |            |            |            |            |            |     |
| Cavia_porcellus             |            |            |            |            |            |            |            |     |
| Ictidomys_tridecemlineatus  |            |            |            |            |            |            |            |     |
| Canis                       |            |            |            |            |            |            |            |     |
| Felis_catus                 |            |            |            |            |            |            |            |     |
| Ochotona_princeps           |            |            |            |            |            |            |            |     |
| Cercopithecidae             |            |            |            |            |            |            |            |     |
| Carnivora                   |            |            |            |            |            |            |            |     |
| Mus                         |            |            |            |            |            |            |            |     |
| Mus_musculus                |            |            |            |            |            |            |            |     |
| Rattus_norvegicus           |            |            |            |            |            |            |            |     |
| Tursiops_truncatus          |            |            |            |            |            |            |            |     |
| Procapra_capensis           |            |            |            |            |            |            |            |     |
| Primates                    |            |            |            |            |            |            |            |     |
| Echinops_telfairi           |            |            |            |            |            |            |            |     |
| Sorex_araneus               |            |            |            |            |            |            |            |     |
| Canidae                     |            |            |            |            |            |            |            |     |
| Otomur_garnettii            |            |            |            |            |            |            |            |     |
| Gallus                      |            |            |            |            |            |            |            |     |
| Callithrix_jacchus          |            |            |            |            |            |            |            |     |
| Crocodylus_porosus          |            |            |            |            |            |            |            |     |
| Erinaceus_europaeus         |            |            |            |            |            |            |            |     |
| rnd-6_family-7426-LTR-ERV1  |            |            |            |            |            |            |            |     |
| Esox_lucius                 |            |            |            |            |            |            |            |     |
| Salmo_salar                 |            |            |            |            |            |            |            |     |
| Didelphidae                 |            |            |            |            |            |            |            |     |
| Latimeria_chalumnae         |            |            |            |            |            |            |            |     |
| Monodelphis_domestica       |            |            |            |            |            |            |            |     |
| Macropus_eugenii            |            |            |            |            |            |            |            |     |
| Alligator_mississippiensis  |            |            |            |            |            |            |            |     |
| Chrysemys_picta_bellii      |            |            |            |            |            |            |            |     |
| Danio_rerio                 |            |            |            |            |            |            |            |     |
| Taeniopygia                 |            |            |            |            |            |            |            |     |
| Dasyus_novemcinctus         |            |            |            |            |            |            |            |     |
| LTR_XT                      |            |            |            |            |            |            |            |     |
| Haplorrhini                 | GTGAGAGTGA | AAGTGCGCCG | CGAGGGAGGA | AATGGGAGGA | AAAGCATCGA | AGCCAACCTC | ATTAGAATGT | 908 |
| Catarrhini                  | GTGAGCGTGG | TGTTTTGTCT | CGAGGAAACA | CGGGTCAGGC | ACAAAGT--A | AGCCACCCC  | ACTAGGAAC  | 587 |
| Anolis_carolinensis         |            |            |            |            |            |            |            |     |
| Murine_leukemia_virus       | NTGTNNNNGA | CCGNTTNTNN | NNNNNNNGNN | CNNCCNTAT  | ANNANNNTN  | NGANNNNNAC | NCTNGNACAC | 543 |
| Phascolarctos_cinereus      | CT--TCGGGA | CCCCCAGAA  | GGGACAGGGT | GAGTC----  | --GACCCCTC | TCTCTTTAC  | ACTAGATCAC | 501 |
| Estrildidae                 |            |            |            |            |            |            |            |     |
| Xenopus_Silurana_tropicalis |            |            |            |            |            |            |            |     |
| LTR_XT                      | AGANGCNAGG | GTTANANTGA | TGTTAATGTT | AAAGATNNTN | TNTGGNGGCA | NAAAAGTNT  | CTCAGNNNTT | 389 |
| Takifugu_rubripes           |            |            |            |            |            |            |            |     |
| Bos_taurus                  |            |            |            |            |            |            |            |     |
| Homo_sapiens                |            |            |            |            |            |            |            |     |
| Microcebus_murinus          |            |            |            |            |            |            |            |     |
| Myotis_lucifugus            |            |            |            |            |            |            |            |     |
| Equus_caballus              |            |            |            |            |            |            |            |     |
| Tupaia_belangeri            |            |            |            |            |            |            |            |     |
| Loxodonta_africana          |            |            |            |            |            |            |            |     |
| Murinae                     |            |            |            |            |            |            |            |     |
| Canis_lupus_familiaris      |            |            |            |            |            |            |            |     |
| Sus_scrofa                  |            |            |            |            |            |            |            |     |
| Choloepus_hoffmanni         |            |            |            |            |            |            |            |     |
| Vicugna_pacos               |            |            |            |            |            |            |            |     |
| Gavialis_gangeticus         |            |            |            |            |            |            |            |     |
| Mammalia                    |            |            |            |            |            |            |            |     |
| Passeroidea                 |            |            |            |            |            |            |            |     |
| Takifugu                    |            |            |            |            |            |            |            |     |
| Pteropus_vampyrus           |            |            |            |            |            |            |            |     |
| Ornithorhynchus             |            |            |            |            |            |            |            |     |
| Oryctolagus_cuniculus       |            |            |            |            |            |            |            |     |
| Gallus_gallus               |            |            |            |            |            |            |            |     |
| Hominidae                   |            |            |            |            |            |            |            |     |
| Metatheria                  |            |            |            |            |            |            |            |     |
| Rodentia                    |            |            |            |            |            |            |            |     |
| Monodelphis                 |            |            |            |            |            |            |            |     |
| Consensus                   |            |            |            |            |            |            |            |     |
| Conservation                | 100%       |            |            |            |            |            |            | 0%  |

|                             | 920           | 940        | 960        | 980        |            |            |                |     |
|-----------------------------|---------------|------------|------------|------------|------------|------------|----------------|-----|
| Dipodomys_ordii             |               |            |            |            |            |            |                |     |
| Laurasiatheria              |               |            |            |            |            |            |                |     |
| Eutheria                    |               |            |            |            |            |            |                |     |
| Tarsius_syricha             |               |            |            |            |            |            |                |     |
| Muridae                     |               |            |            |            |            |            |                |     |
| Gasterosteus_aculeatus      |               |            |            |            |            |            |                |     |
| Felis_silvestris            |               |            |            |            |            |            |                |     |
| Rattus                      |               |            |            |            |            |            |                |     |
| Papio_hamadryas             |               |            |            |            |            |            |                |     |
| Pan_troglodytes             |               |            |            |            |            |            |                |     |
| Ailuropoda_melanoleuca      |               |            |            |            |            |            |                |     |
| Cavia_porcellus             |               |            |            |            |            |            |                |     |
| Ictidomys_tridecemlineatus  |               |            |            |            |            |            |                |     |
| Canis                       |               |            |            |            |            |            |                |     |
| Felis_catus                 |               |            |            |            |            |            |                |     |
| Ochotona_princeps           |               |            |            |            |            |            |                |     |
| Cercopithecidae             |               |            |            |            |            |            |                |     |
| Carnivora                   |               |            |            |            |            |            |                |     |
| Mus                         |               |            |            |            |            |            |                |     |
| Mus_musculus                |               |            |            |            |            |            |                |     |
| Rattus_norvegicus           |               |            |            |            |            |            |                |     |
| Tursiops_truncatus          |               |            |            |            |            |            |                |     |
| Procyon_capensis            |               |            |            |            |            |            |                |     |
| Primates                    |               |            |            |            |            |            |                |     |
| Echinops_telfairi           |               |            |            |            |            |            |                |     |
| Sorex_araneus               |               |            |            |            |            |            |                |     |
| Canidae                     |               |            |            |            |            |            |                |     |
| Otomomys_garnettii          |               |            |            |            |            |            |                |     |
| Gallus                      |               |            |            |            |            |            |                |     |
| Callithrix_jacchus          |               |            |            |            |            |            |                |     |
| Crocodylus_porosus          |               |            |            |            |            |            |                |     |
| Erinaceus_europaeus         |               |            |            |            |            |            |                |     |
| rnd-6_family-7426-LTR-ERV1  |               |            |            |            |            |            |                |     |
| Esox_lucius                 |               |            |            |            |            |            |                |     |
| Salmo_salar                 |               |            |            |            |            |            |                |     |
| Didelphidae                 |               |            |            |            |            |            |                |     |
| Latimeria_chalumnae         |               |            |            |            |            |            |                |     |
| Monodelphis_domestica       |               |            |            |            |            |            |                |     |
| Macropus_eugenii            |               |            |            |            |            |            |                |     |
| Alligator_mississippiensis  |               |            |            |            |            |            |                |     |
| Chrysemys_picta_bellii      |               |            |            |            |            |            |                |     |
| Danio_rerio                 |               |            |            |            |            |            |                |     |
| Taeniopygia                 |               |            |            |            |            |            |                |     |
| Dasyus_novemcinctus         |               |            |            |            |            |            |                |     |
| LTR_XT                      |               |            |            |            |            |            |                |     |
| Haplorrhini                 | ATGTTGAAGA    | ACTTTAAGAA | AGGCCTTGAT | GGTGATTATG | GAATGAAGTT | AACACCGCAG | AGGCTAAGAA     | 978 |
| Catarrhini                  | ATGTTGAAA     | ATTCAAAA   | GGGATTTAAG | GGAGACTATG | GAGTCACCAT | GACACCAGGA | AAACTTAGAA     | 657 |
| Anolis_carolinensis         |               |            |            |            |            |            |                |     |
| Murine_leukemia_virus       | - - - NNGNNAG | NCNTCCNNNN | NANTGNGTCN | NNCNNGTNCN | NGNNNNNCNA | NNANAGNCNN | TNGCT - GTNN   | 609 |
| Phascolarctos_cinereus      | - - - TGGAAAG | ACGTGAAGAC | AAGGGCTCAC | AATCTTTCCG | TGGAGATAAG | AAAGGGAAAG | TGGC - - - AAA | 565 |
| Estrildidae                 |               |            |            |            |            |            |                |     |
| Xenopus_Silurana_tropicalis |               |            |            |            |            |            |                |     |
| LTR_XT                      | NAANGNATCA    | ANGNCNGGT  | CAGNCAGANN | GNGAAGANN  | AGNACNNNN  | GTNGANGANG | AGTCNGATCA     | 459 |
| Takifugu_rubripes           |               |            |            |            |            |            |                |     |
| Bos_taurus                  |               |            |            |            |            |            |                |     |
| Homo_sapiens                |               |            |            |            |            |            |                |     |
| Microcebus_murinus          |               |            |            |            |            |            |                |     |
| Myotis_lucifugus            |               |            |            |            |            |            |                |     |
| Equus_caballus              |               |            |            |            |            |            |                |     |
| Tupaia_belangeri            |               |            |            |            |            |            |                |     |
| Loxodonta_africana          |               |            |            |            |            |            |                |     |
| Murinae                     |               |            |            |            |            |            |                |     |
| Canis_lupus_familiaris      |               |            |            |            |            |            |                |     |
| Sus_scrofa                  |               |            |            |            |            |            |                |     |
| Choloepus_hoffmanni         |               |            |            |            |            |            |                |     |
| Vicugna_pacos               |               |            |            |            |            |            |                |     |
| Gavialis_gangeticus         |               |            |            |            |            |            |                |     |
| Mammalia                    |               |            |            |            |            |            |                |     |
| Passeroidea                 |               |            |            |            |            |            |                |     |
| Takifugu                    |               |            |            |            |            |            |                |     |
| Pteropus_vampyrus           |               |            |            |            |            |            |                |     |
| Ornithorhynchus             |               |            |            |            |            |            |                |     |
| Oryctolagus_cuniculus       |               |            |            |            |            |            |                |     |
| Gallus_gallus               |               |            |            |            |            |            |                |     |
| Homnidae                    |               |            |            |            |            |            |                |     |
| Metatheria                  |               |            |            |            |            |            |                |     |
| Rodentia                    |               |            |            |            |            |            |                |     |
| Monodelphis                 |               |            |            |            |            |            |                |     |
| Consensus                   |               |            |            |            |            |            |                |     |
| Conservation                | 100%          |            |            |            |            |            |                | 0%  |

|                             | 1,000       | 1,020      | 1,040      |            |            |               |                 |
|-----------------------------|-------------|------------|------------|------------|------------|---------------|-----------------|
| Dipodomys_ordii             |             |            |            |            |            |               |                 |
| Laurasiatheria              |             |            |            |            |            |               |                 |
| Eutheria                    |             |            |            |            |            |               |                 |
| Tarsius_syricha             |             |            |            |            |            |               |                 |
| Muridae                     |             |            |            |            |            |               |                 |
| Gasterosteus_aculeatus      |             |            |            |            |            |               |                 |
| Felis_silvestris            |             |            |            |            |            |               |                 |
| Rattus                      |             |            |            |            |            |               |                 |
| Papio_hamadryas             |             |            |            |            |            |               |                 |
| Pan_troglodytes             |             |            |            |            |            |               |                 |
| Ailuropoda_melanoleuca      |             |            |            |            |            |               |                 |
| Cavia_porcellus             |             |            |            |            |            |               |                 |
| Ictidomys_tridecemlineatus  |             |            |            |            |            |               |                 |
| Canis                       |             |            |            |            |            |               |                 |
| Felis_catus                 |             |            |            |            |            |               |                 |
| Ochotona_princeps           |             |            |            |            |            |               |                 |
| Cercopithecidae             |             |            |            |            |            |               |                 |
| Carnivora                   |             |            |            |            |            |               |                 |
| Mus                         |             |            |            |            |            |               |                 |
| Mus_musculus                |             |            |            |            |            |               |                 |
| Rattus_norvegicus           |             |            |            |            |            |               |                 |
| Tursiops_truncatus          |             |            |            |            |            |               |                 |
| Procapra_capensis           |             |            |            |            |            |               |                 |
| Primates                    |             |            |            |            |            |               |                 |
| Echinops_telfairi           |             |            |            |            |            |               |                 |
| Sorex_araneus               |             |            |            |            |            |               |                 |
| Canidae                     |             |            |            |            |            |               |                 |
| Otomomys_garnettii          |             |            |            |            |            |               |                 |
| Gallus                      |             |            |            |            |            |               |                 |
| Callithrix_jacchus          |             |            |            |            |            |               |                 |
| Crocodylus_porosus          |             |            |            |            |            |               |                 |
| Erinaceus_europaeus         |             |            |            |            |            |               |                 |
| rnd-6_family-7426-LTR-ERV1  |             |            |            |            |            |               |                 |
| Esox_lucius                 |             |            |            |            |            |               |                 |
| Salmo_salar                 |             |            |            |            |            |               |                 |
| Didelphidae                 |             |            |            |            |            |               |                 |
| Latimeria_chalumnae         |             |            |            |            |            |               |                 |
| Monodelphis_domestica       |             |            |            |            |            |               |                 |
| Macropus_eugenii            |             |            |            |            |            |               |                 |
| Alligator_mississippiensis  |             |            |            |            |            |               |                 |
| Chrysemys_picta_bellii      |             |            |            |            |            |               |                 |
| Danio_rerio                 |             |            |            |            |            |               |                 |
| Taeniopygia                 |             |            |            |            |            |               |                 |
| Dasyus_novemcinctus         |             |            |            |            |            |               |                 |
| LTR_XT                      |             |            |            |            |            |               |                 |
| Haplorrhini                 | CNCTTTNTGA  | AATTGACTGG | CCCTCCTTTA | ATGTAGGGTG | GNCGGCCGAG | GG - - AACCAT | AGATAGGGAA 1046 |
| Catarrhini                  | CTTTGTGTGA  | GATAGACTGG | CCAGATTAG  | AGGTGGGTTG | GCCATCAGAA | GG - - AAGCCT | GGACAGGTCC 725  |
| Anolis_carolinensis         |             |            |            |            |            |               |                 |
| Murine_leukemia_virus       | NCNTCNGNNN  | NGNNGNNTNG | CNNANNNTNG | ATGNNGGGTN | NCCNCANNNT | GNTTGACTNN    | NNANNNTGNN 679  |
| Phascolarctos_cinereus      | CCTTCTGTTC  | CTCCGAGTGG | CCCACGTTCC | AAGTGGGATG | GCCACCGGAG | GG - - GACTTT | TAATCCTTCT 633  |
| Estrildidae                 |             |            |            |            |            |               |                 |
| Xenopus_Silurana_tropicalis |             |            |            |            |            |               |                 |
| L_XT                        | GNANAAATGGG | AATGNANAGT | TNTTTNACAA | ANCGCNAGGN | ANAANTNNA  | GATTCANGAT    | CAACNGATGA 529  |
| Takifugu_rubripes           |             |            |            |            |            |               |                 |
| Bos_taurus                  |             |            |            |            |            |               |                 |
| Homo_sapiens                |             |            |            |            |            |               |                 |
| Microcebus_murinus          |             |            |            |            |            |               |                 |
| Myotis_lucifugus            |             |            |            |            |            |               |                 |
| Equus_caballus              |             |            |            |            |            |               |                 |
| Tupaia_belangeri            |             |            |            |            |            |               |                 |
| Loxodonta_africana          |             |            |            |            |            |               |                 |
| Murinae                     |             |            |            |            |            |               |                 |
| Canis_lupus_familiaris      |             |            |            |            |            |               |                 |
| Sus_scrofa                  |             |            |            |            |            |               |                 |
| Choloepus_hoffmanni         |             |            |            |            |            |               |                 |
| Vicugna_pacos               |             |            |            |            |            |               |                 |
| Gavialis_gangeticus         |             |            |            |            |            |               |                 |
| Mammalia                    |             |            |            |            |            |               |                 |
| Passeroidea                 |             |            |            |            |            |               |                 |
| Takifugu                    |             |            |            |            |            |               |                 |
| Pteropus_vampyrus           |             |            |            |            |            |               |                 |
| Ornithorhynchus             |             |            |            |            |            |               |                 |
| Oryctolagus_cuniculus       |             |            |            |            |            |               |                 |
| Gallus_gallus               |             |            |            |            |            |               |                 |
| Hominidae                   |             |            |            |            |            |               |                 |
| Metatheria                  |             |            |            |            |            |               |                 |
| Rodentia                    |             |            |            |            |            |               |                 |
| Monodelphis                 |             |            |            |            |            |               |                 |
| Consensus                   |             |            |            |            |            |               |                 |
| Conservation                | 100%        |            |            |            |            |               | 0%              |

|                             | 1,060      | 1,080                                                       | 1,100      | 1,120      |            |            |            |      |
|-----------------------------|------------|-------------------------------------------------------------|------------|------------|------------|------------|------------|------|
| Dipodomys_ordii             | ----       | ----                                                        | ----       | ----       | -          |            |            |      |
| Laurasiatheria              | ----       | ----                                                        | ----       | ----       | -          |            |            |      |
| Eutheria                    | ----       | ----                                                        | ----       | ----       | -          |            |            |      |
| Tarsius_syricha             | ----       | ----                                                        | ----       | ----       | -          |            |            |      |
| Muridae                     | ----       | ----                                                        | ----       | ----       | -          |            |            |      |
| Gasterosteus_aculeatus      | ----       | ----                                                        | ----       | ----       | -          |            |            |      |
| Felis_silvestris            | ----       | ----                                                        | ----       | ----       | -          |            |            |      |
| Rattus                      | ----       | ----                                                        | ----       | ----       | -          |            |            |      |
| Papio_hamadryas             | ----       | ----                                                        | ----       | ----       | -          |            |            |      |
| Pan_troglodytes             | ----       | ----                                                        | ----       | ----       | -          |            |            |      |
| Ailuropoda_melanoleuca      | ----       | ----                                                        | ----       | ----       | -          |            |            |      |
| Cavia_porcellus             | ----       | ----                                                        | ----       | ----       | -          |            |            |      |
| Ictidomys_tridecemlineatus  | ----       | ----                                                        | ----       | ----       | -          |            |            |      |
| Canis                       | ----       | ----                                                        | ----       | ----       | -          |            |            |      |
| Felis_catus                 | ----       | ----                                                        | ----       | ----       | -          |            |            |      |
| Ochotona_princeps           | ----       | ----                                                        | ----       | ----       | -          |            |            |      |
| Cercopithecidae             | ----       | ----                                                        | ----       | ----       | -          |            |            |      |
| Carnivora                   | ----       | ----                                                        | ----       | ----       | -          |            |            |      |
| Mus                         | ----       | ----                                                        | ----       | ----       | -          |            |            |      |
| Mus_musculus                | ----       | ----                                                        | ----       | ----       | -          |            |            |      |
| Rattus_norvegicus           | ----       | ----                                                        | ----       | ----       | -          |            |            |      |
| Tursiops_truncatus          | ----       | ----                                                        | ----       | ----       | -          |            |            |      |
| Procyon_capensis            | ----       | ----                                                        | ----       | ----       | -          |            |            |      |
| Primates                    | ----       | ----                                                        | ----       | ----       | -          |            |            |      |
| Echinops_telfairi           | ----       | ----                                                        | ----       | ----       | -          |            |            |      |
| Sorex_araneus               | ----       | ----                                                        | ----       | ----       | -          |            |            |      |
| Canidae                     | ----       | ----                                                        | ----       | ----       | -          |            |            |      |
| Otomomys_garnettii          | ----       | ----                                                        | ----       | ----       | -          |            |            |      |
| Gallus                      | ----       | ----                                                        | ----       | ----       | -          |            |            |      |
| Callithrix_jacchus          | ----       | ----                                                        | ----       | ----       | -          |            |            |      |
| Crocodylus_porosus          | ----       | ----                                                        | ----       | ----       | -          |            |            |      |
| Erinaceus_europaeus         | ----       | ----                                                        | ----       | ----       | -          |            |            |      |
| rnd-6_family-7426-LTR-ERV1  | ----       | ----                                                        | ----       | ----       | -          |            |            |      |
| Esox_lucius                 | ----       | ----                                                        | ----       | ----       | -          |            |            |      |
| Salmo_salar                 | ----       | ----                                                        | ----       | ----       | -          |            |            |      |
| Didelphidae                 | ----       | ----                                                        | ----       | ----       | -          |            |            |      |
| Latimeria_chalumnae         | ----       | ----                                                        | ----       | ----       | -          |            |            |      |
| Monodelphis_domestica       | ----       | ----                                                        | ----       | ----       | -          |            |            |      |
| Macropus_eugenii            | ----       | ----                                                        | ----       | ----       | -          |            |            |      |
| Alligator_mississippiensis  | ----       | ----                                                        | ----       | ----       | -          |            |            |      |
| Chrysemys_picta_bellii      | ----       | ----                                                        | ----       | ----       | -          |            |            |      |
| Danio_rerio                 | ----       | ----                                                        | ----       | ----       | -          |            |            |      |
| Taeniopygia                 | ----       | ----                                                        | ----       | ----       | -          |            |            |      |
| Dasyus_novemcinctus         | ----       | ----                                                        | ----       | ----       | -          |            |            |      |
| LTR_XT                      | ----       | ----                                                        | ----       | ----       | -          |            |            |      |
| Haplorrhini                 | ATAATTGGCC | GAGTGTTTCG                                                  | GGTGGTCACT | GGGGTCGGAG | AACAGCCTGG | GCACCCTGAT | CAGTTCCCAT | 1116 |
| Catarrhini                  | CTTGTCTCGA | AGGTATGGCA                                                  | CAGGGTAACC | TGTA       | --AGCCAGG  | GCACCCGGAT | CAGTTCCCAT | 786  |
| Anolis_carolinensis         | ----       | ----                                                        | ----       | ----       | ----       | ----       | ----       | -    |
| Murine_leukemia_virus       | NNTNTTNNAC | AGGTAAATC                                                   | TAAGGTGTTT | TCTCCGG--  | -TCCCCAGG  | ACACCCGGAT | CAGGTCCCAT | 746  |
| Phascolarctos_cinereus      | ATTATTTCTG | CAGTCAAA--                                                  | -AGGATTGTC | TTCCAGGA-- | -GACTGGAGG | ACACCCGGAC | CAGGTTCCCT | 697  |
| Estrildidae                 | ----       | ----                                                        | ----       | ----       | ----       | ----       | ----       | -    |
| Xenopus_Silurana_tropicalis | ----       | ----                                                        | ----       | ----       | ----       | ----       | ----       | -    |
| LTR_XT                      | AAATNGTGAA | AGCTNTGCCN                                                  | NNANATAACN | TTTNCNANAN | ACATTTGTTA | ATNTTNCCAT | NCNNGGAGCA | 599  |
| Takifugu_rubripes           | ----       | ----                                                        | ----       | ----       | ----       | ----       | ----       | -    |
| Bos_taurus                  | ----       | ----                                                        | ----       | ----       | ----       | ----       | ----       | -    |
| Homo_sapiens                | ----       | ----                                                        | ----       | ----       | ----       | ----       | ----       | -    |
| Microcebus_murinus          | ----       | ----                                                        | ----       | ----       | ----       | ----       | ----       | -    |
| Myotis_lucifugus            | ----       | ----                                                        | ----       | ----       | ----       | ----       | ----       | -    |
| Equus_caballus              | ----       | ----                                                        | ----       | ----       | ----       | ----       | ----       | -    |
| Tupaia_belangeri            | ----       | ----                                                        | ----       | ----       | ----       | ----       | ----       | -    |
| Loxodonta_africana          | ----       | ----                                                        | ----       | ----       | ----       | ----       | ----       | -    |
| Murinae                     | ----       | ----                                                        | ----       | ----       | ----       | ----       | ----       | -    |
| Canis_lupus_familiaris      | ----       | ----                                                        | ----       | ----       | ----       | ----       | ----       | -    |
| Sus_scrofa                  | ----       | ----                                                        | ----       | ----       | ----       | ----       | ----       | -    |
| Choloepus_hoffmanni         | ----       | ----                                                        | ----       | ----       | ----       | ----       | ----       | -    |
| Vicugna_pacos               | ----       | ----                                                        | ----       | ----       | ----       | ----       | ----       | -    |
| Gavialis_gangeticus         | ----       | ----                                                        | ----       | ----       | ----       | ----       | ----       | -    |
| Mammalia                    | ----       | ----                                                        | ----       | ----       | ----       | ----       | ----       | -    |
| Passeroidea                 | ----       | ----                                                        | ----       | ----       | ----       | ----       | ----       | -    |
| Takifugu                    | ----       | ----                                                        | ----       | ----       | ----       | ----       | ----       | -    |
| Pteropus_vampyrus           | ----       | ----                                                        | ----       | ----       | ----       | ----       | ----       | -    |
| Ornithorhynchus             | ----       | ----                                                        | ----       | ----       | ----       | ----       | ----       | -    |
| Oryctolagus_cuniculus       | ----       | ----                                                        | ----       | ----       | ----       | ----       | ----       | -    |
| Gallus_gallus               | ----       | ----                                                        | ----       | ----       | ----       | ----       | ----       | -    |
| Hominidae                   | ----       | ----                                                        | ----       | ----       | ----       | ----       | ----       | -    |
| Metatheria                  | ----       | ----                                                        | ----       | ----       | ----       | ----       | ----       | -    |
| Rodentia                    | ----       | ----                                                        | ----       | ----       | ----       | ----       | ----       | -    |
| Monodelphis                 | ----       | ----                                                        | ----       | ----       | ----       | ----       | ----       | -    |
| Consensus                   | ----       | ----                                                        | ----       | ----       | ----       | ----       | ----       | -    |
| Conservation                | 100%       | [Bar chart showing conservation levels across the sequence] |            |            |            |            |            | 0%   |

|                             | 1,140      | 1,160      | 1,180      |            |            |            |            |      |
|-----------------------------|------------|------------|------------|------------|------------|------------|------------|------|
| Dipodomys_ordii             |            |            |            |            |            |            |            |      |
| Laurasiatheria              |            |            |            |            |            |            |            |      |
| Eutheria                    |            |            |            |            |            |            |            |      |
| Tarsius_syrichta            |            |            |            |            |            |            |            |      |
| Muridae                     |            |            |            |            |            |            |            |      |
| Gasterosteus_aculeatus      |            |            |            |            |            |            |            |      |
| Felis_silvestris            |            |            |            |            |            |            |            |      |
| Rattus                      |            |            |            |            |            |            |            |      |
| Papio_hamadryas             |            |            |            |            |            |            |            |      |
| Pan_troglodytes             |            |            |            |            |            |            |            |      |
| Ailuropoda_melanoleuca      |            |            |            |            |            |            |            |      |
| Cavia_porcellus             |            |            |            |            |            |            |            |      |
| Ictidomys_tridecemlineatus  |            |            |            |            |            |            |            |      |
| Canis                       |            |            |            |            |            |            |            |      |
| Felis_catus                 |            |            |            |            |            |            |            |      |
| Ochotona_princeps           |            |            |            |            |            |            |            |      |
| Cercopithecidae             |            |            |            |            |            |            |            |      |
| Carnivora                   |            |            |            |            |            |            |            |      |
| Mus                         |            |            |            |            |            |            |            |      |
| Mus_musculus                |            |            |            |            |            |            |            |      |
| Rattus_norvegicus           |            |            |            |            |            |            |            |      |
| Tursiops_truncatus          |            |            |            |            |            |            |            |      |
| Procapra_capensis           |            |            |            |            |            |            |            |      |
| Primates                    |            |            |            |            |            |            |            |      |
| Echinops_telfairi           |            |            |            |            |            |            |            |      |
| Sorex_araneus               |            |            |            |            |            |            |            |      |
| Canidae                     |            |            |            |            |            |            |            |      |
| Otolemur_garnettii          |            |            |            |            |            |            |            |      |
| Gallus                      |            |            |            |            |            |            |            |      |
| Callithrix_jacchus          |            |            |            |            |            |            |            |      |
| Crocodylus_porosus          |            |            |            |            |            |            |            |      |
| Erinaceus_europaeus         |            |            |            |            |            |            |            |      |
| rnd-6_family-7426-LTR-ERV1  |            |            |            |            |            |            |            |      |
| Esox_lucius                 |            |            |            |            |            |            |            |      |
| Salmo_salar                 |            |            |            |            |            |            |            |      |
| Didelphidae                 |            |            |            |            |            |            |            |      |
| Latimeria_chalumnae         |            |            |            |            |            |            |            |      |
| Monodelphis_domestica       |            |            |            |            |            |            |            |      |
| Macropus_eugenii            |            |            |            |            |            |            |            |      |
| Alligator_mississippiensis  |            |            |            |            |            |            |            |      |
| Chrysemys_picta_bellii      |            |            |            |            |            |            |            |      |
| Danio_rerio                 |            |            |            |            |            |            |            |      |
| Taeniopygia                 |            |            |            |            |            |            |            |      |
| Dasybus_novemcinctus        |            |            |            |            |            |            |            |      |
| LTR_XT                      |            |            |            |            |            |            |            |      |
| Haplorrhini                 | ACATAGACTC | CTGGCTGAGC | GTGATTCAGA | CCCATCCGAA | ATGGCTACAG | GCCTGCTTTG | AAGATTATTG | 1186 |
| Catarrhini                  | ATATAGATTG | TTGGTTACAG | CTAGTTTTGG | ACCCCCACA  | GTGGTTAAGA | GG-----A   | CAGGCAGCAG | 849  |
| Anolis_carolinensis         |            |            |            |            |            |            |            |      |
| Murine_leukemia_virus       | ACATTGTGAC | CTGGGAGGCT | ATTGCTATG  | ANCCCCCTCC | GTGGGTCAAA | CC-----TT  | TTGTCTCTCC | 810  |
| Phascolarctos_cinereus      | ACATCATAGT | TTGGCAGGAC | CTCTCCAACA | GCCCCCCCC  | ATGGGTGCCA | CC-----CT  | TAG-----C  | 755  |
| Estrildidae                 |            |            |            |            |            |            |            |      |
| Xenopus_Silurana_tropicalis |            |            |            |            |            |            |            |      |
| L_XT                        | AATNTNAACA | GATATNCTGN | GTCTGATCNA | CCAACCAATA | NGGTANTGAA | ANATNGACAC | CCCACNCNNN | 669  |
| Takifugu_rubripes           |            |            |            |            |            |            |            |      |
| Bos_taurus                  |            |            |            |            |            |            |            |      |
| Homo_sapiens                |            |            |            |            |            |            |            |      |
| Microcebus_murinus          |            |            |            |            |            |            |            |      |
| Myotis_lucifugus            |            |            |            |            |            |            |            |      |
| Equus_caballus              |            |            |            |            |            |            |            |      |
| Tupaia_belangeri            |            |            |            |            |            |            |            |      |
| Loxodonta_africana          |            |            |            |            |            |            |            |      |
| Murinae                     |            |            |            |            |            |            |            |      |
| Canis_lupus_familiaris      |            |            |            |            |            |            |            |      |
| Sus_scrofa                  |            |            |            |            |            |            |            |      |
| Choloepus_hoffmanni         |            |            |            |            |            |            |            |      |
| Vicugna_pacos               |            |            |            |            |            |            |            |      |
| Gavialis_gangeticus         |            |            |            |            |            |            |            |      |
| Mammalia                    |            |            |            |            |            |            |            |      |
| Passeroidea                 |            |            |            |            |            |            |            |      |
| Takifugu                    |            |            |            |            |            |            |            |      |
| Pteropus_vampyrus           |            |            |            |            |            |            |            |      |
| Ornithorhynchus             |            |            |            |            |            |            |            |      |
| Oryctolagus_cuniculus       |            |            |            |            |            |            |            |      |
| Gallus_gallus               |            |            |            |            |            |            |            |      |
| Hominidae                   |            |            |            |            |            |            |            |      |
| Metatheria                  |            |            |            |            |            |            |            |      |
| Rodentia                    |            |            |            |            |            |            |            |      |
| Monodelphis                 |            |            |            |            |            |            |            |      |
| Consensus                   |            |            |            |            |            |            |            |      |
| Conservation                | 100%       |            |            |            |            |            |            |      |
|                             | 0%         |            |            |            |            |            |            |      |

|                             | 1,200         | 1,220          | 1,240       | 1,260         |            |            |            |      |
|-----------------------------|---------------|----------------|-------------|---------------|------------|------------|------------|------|
| Dipodomys_ordii             |               |                |             |               |            |            |            |      |
| Laurasiatheria              |               |                |             |               |            |            |            |      |
| Eutheria                    |               |                |             |               |            |            |            |      |
| Tarsius_syricha             |               |                |             |               |            |            |            |      |
| Muridae                     |               |                |             |               |            |            |            |      |
| Gasterosteus_aculeatus      |               |                |             |               |            |            |            |      |
| Felis_silvestris            |               |                |             |               |            |            |            |      |
| Rattus                      |               |                |             |               |            |            |            |      |
| Papio_hamadryas             |               |                |             |               |            |            |            |      |
| Pan_troglodytes             |               |                |             |               |            |            |            |      |
| Ailuropoda_melanoleuca      |               |                |             |               |            |            |            |      |
| Cavia_porcellus             |               |                |             |               |            |            |            |      |
| Ictidomys_tridecemlineatus  |               |                |             |               |            |            |            |      |
| Canis                       |               |                |             |               |            |            |            |      |
| Felis_catus                 |               |                |             |               |            |            |            |      |
| Ochotona_princeps           |               |                |             |               |            |            |            |      |
| Cercopithecidae             |               |                |             |               |            |            |            |      |
| Carnivora                   |               |                |             |               |            |            |            |      |
| Mus                         |               |                |             |               |            |            |            |      |
| Mus_musculus                |               |                |             |               |            |            |            |      |
| Rattus_norvegicus           |               |                |             |               |            |            |            |      |
| Tursiops_truncatus          |               |                |             |               |            |            |            |      |
| Procapra_capensis           |               |                |             |               |            |            |            |      |
| Primates                    |               |                |             |               |            |            |            |      |
| Echinops_telfairi           |               |                |             |               |            |            |            |      |
| Sorex_araneus               |               |                |             |               |            |            |            |      |
| Canidae                     |               |                |             |               |            |            |            |      |
| Otomur_garnettii            |               |                |             |               |            |            |            |      |
| Gallus                      |               |                |             |               |            |            |            |      |
| Callithrix_jacchus          |               |                |             |               |            |            |            |      |
| Crocodylus_porosus          |               |                |             |               |            |            |            |      |
| Erinaceus_europaeus         |               |                |             |               |            |            |            |      |
| rnd-6_family-7426-LTR-ERV1  |               |                |             |               |            |            |            |      |
| Esox_lucius                 |               |                |             |               |            |            |            |      |
| Salmo_salar                 |               |                |             |               |            |            |            |      |
| Didelphidae                 |               |                |             |               |            |            |            |      |
| Latimeria_chalumnae         |               |                |             |               |            |            |            |      |
| Monodelphis_domestica       |               |                |             |               |            |            |            |      |
| Macropus_eugenii            |               |                |             |               |            |            |            |      |
| Alligator_mississippiensis  |               |                |             |               |            |            |            |      |
| Chrysemys_picta_bellii      |               |                |             |               |            |            |            |      |
| Danio_rerio                 |               |                |             |               |            |            |            |      |
| Taeniopygia                 |               |                |             |               |            |            |            |      |
| Dasyus_novemcinctus         |               |                |             |               |            |            |            |      |
| LTR_XT                      |               |                |             |               |            |            |            |      |
| Haplorrhini                 | TAAGACTCTA    | GTGGCTCGTA     | CAAAACAAGG  | AACCATAGAA    | AAGACCCACA | AAGCGCAGNC | CCAGGAGAAA | 1256 |
| Catarrhini                  | CAGTACT - - A | GTAGCA - - - A | AGGGACAGTT  | AGT - - TAAGG | AAGTTTCTCN | CTCCACCCGC | CGAGGGAAGT | 912  |
| Anolis_carolinensis         |               |                |             |               |            |            |            |      |
| Murine_leukemia_virus       | CAAACCTCTCC   | CCCTCTCCGA     | CCGCCTCCGT  | CCTC - CCGTC  | CGGTCCTTCG | ACCCAACCTC | CGCCCGATC  | 879  |
| Phascolarctos_cinereus      | CAAGATCGCC    | GTTGCCTC - -   | - TGGTCAAGA | TAAC - GGGCG  | AAAGTCGGCG | GGGGGGAGGC | CGTCCGCTCC | 821  |
| Estrildidae                 |               |                |             |               |            |            |            |      |
| Xenopus_Silurana_tropicalis |               |                |             |               |            |            |            |      |
| LTR_XT                      | TGTNTAGANG    | NCTAAGCNCT     | CCNNTNAGTG  | NGCNCANACN    | NANTGGATTG | GGAGATGNNC | NACANGGTAC | 739  |
| Takifugu_rubripes           |               |                |             |               |            |            |            |      |
| Bos_taurus                  |               |                |             |               |            |            |            |      |
| Homo_sapiens                |               |                |             |               |            |            |            |      |
| Microcebus_murinus          |               |                |             |               |            |            |            |      |
| Myotis_lucifugus            |               |                |             |               |            |            |            |      |
| Equus_caballus              |               |                |             |               |            |            |            |      |
| Tupaia_belangeri            |               |                |             |               |            |            |            |      |
| Loxodonta_africana          |               |                |             |               |            |            |            |      |
| Murinae                     |               |                |             |               |            |            |            |      |
| Canis_lupus_familiaris      |               |                |             |               |            |            |            |      |
| Sus_scrofa                  |               |                |             |               |            |            |            |      |
| Choloepus_hoffmanni         |               |                |             |               |            |            |            |      |
| Vicugna_pacos               |               |                |             |               |            |            |            |      |
| Gavialis_gangeticus         |               |                |             |               |            |            |            |      |
| Mammalia                    |               |                |             |               |            |            |            |      |
| Passeroidea                 |               |                |             |               |            |            |            |      |
| Takifugu                    |               |                |             |               |            |            |            |      |
| Pteropus_vampyrus           |               |                |             |               |            |            |            |      |
| Ornithorhynchus             |               |                |             |               |            |            |            |      |
| Oryctolagus_cuniculus       |               |                |             |               |            |            |            |      |
| Gallus_gallus               |               |                |             |               |            |            |            |      |
| Hominidae                   |               |                |             |               |            |            |            |      |
| Metatheria                  |               |                |             |               |            |            |            |      |
| Rodentia                    |               |                |             |               |            |            |            |      |
| Monodelphis                 |               |                |             |               |            |            |            |      |
| Consensus                   |               |                |             |               |            |            |            |      |
| Conservation                | 100%          |                |             |               |            |            |            | 0%   |

|                             | 1,280      | 1,300       | 1,320       |             |            |             |            |      |
|-----------------------------|------------|-------------|-------------|-------------|------------|-------------|------------|------|
| Dipodomys_ordii             |            |             |             |             |            |             |            |      |
| Laurasiatheria              |            |             |             |             |            |             |            |      |
| Eutheria                    |            |             |             |             |            |             |            |      |
| Tarsius_syricha             |            |             |             |             |            |             |            |      |
| Muridae                     |            |             |             |             |            |             |            |      |
| Gasterosteus_aculeatus      |            |             |             |             |            |             |            |      |
| Felis_silvestris            |            |             |             |             |            |             |            |      |
| Rattus                      |            |             |             |             |            |             |            |      |
| Papio_hamadryas             |            |             |             |             |            |             |            |      |
| Pan_troglodytes             |            |             |             |             |            |             |            |      |
| Ailuropoda_melanoleuca      |            |             |             |             |            |             |            |      |
| Cavia_porcellus             |            |             |             |             |            |             |            |      |
| Ictidomys_tridecemlineatus  |            |             |             |             |            |             |            |      |
| Canis                       |            |             |             |             |            |             |            |      |
| Felis_catus                 |            |             |             |             |            |             |            |      |
| Ochotona_princeps           |            |             |             |             |            |             |            |      |
| Cercopithecidae             |            |             |             |             |            |             |            |      |
| Carnivora                   |            |             |             |             |            |             |            |      |
| Mus                         |            |             |             |             |            |             |            |      |
| Mus_musculus                |            |             |             |             |            |             |            |      |
| Rattus_norvegicus           |            |             |             |             |            |             |            |      |
| Tursiops_truncatus          |            |             |             |             |            |             |            |      |
| Procapra_capensis           |            |             |             |             |            |             |            |      |
| Primates                    |            |             |             |             |            |             |            |      |
| Echinops_telfairi           |            |             |             |             |            |             |            |      |
| Sorex_araneus               |            |             |             |             |            |             |            |      |
| Canidae                     |            |             |             |             |            |             |            |      |
| Otomomys_garnettii          |            |             |             |             |            |             |            |      |
| Gallus                      |            |             |             |             |            |             |            |      |
| Callithrix_jacchus          |            |             |             |             |            |             |            |      |
| Crocodylus_porosus          |            |             |             |             |            |             |            |      |
| Erinaceus_europaeus         |            |             |             |             |            |             |            |      |
| rnd-6_family-7426-LTR-ERV1  |            |             |             |             |            |             |            |      |
| Esox_lucius                 |            |             |             |             |            |             |            |      |
| Salmo_salar                 |            |             |             |             |            |             |            |      |
| Didelphidae                 |            |             |             |             |            |             |            |      |
| Latimeria_chalumnae         |            |             |             |             |            |             |            |      |
| Monodelphis_domestica       |            |             |             |             |            |             |            |      |
| Macropus_eugenii            |            |             |             |             |            |             |            |      |
| Alligator_mississippiensis  |            |             |             |             |            |             |            |      |
| Chrysemys_picta_bellii      |            |             |             |             |            |             |            |      |
| Danio_rerio                 |            |             |             |             |            |             |            |      |
| Taeniopygia                 |            |             |             |             |            |             |            |      |
| Dasyus_novemcinctus         |            |             |             |             |            |             |            |      |
| LTR_XT                      |            |             |             |             |            |             |            |      |
| Haplorrhini                 | GAGCAGCAAG | GAAAAACAGGA | AAAACCTGTC  | CTACAGGCC   | CGCCAGAAGA | GCTAGAGACT  | CCACCCCCTT | 1326 |
| Catarrhini                  | CGGCACCAA  |             | AAGTCCTGTC  | CGACC - CAA | CACCAGAAGA | ATCATGG - - | -CAGGAATTG | 965  |
| Anolis_carolinensis         |            |             |             |             |            |             |            |      |
| Murine_leukemia_virus       | TGCCCTTTA  |             | - CCCTGTC   | CTTAC - CCC | CTCTATAAAA | CCCAGAC - - | - CTTC     | 924  |
| Phascolarctos_cinereus      | TTCCCGGCT  |             | - CCCCA - T | CTACC - CGG | AGACGGACAG | CCTGTTC - - | - CTCC     | 865  |
| Estrildidae                 |            |             |             |             |            |             |            |      |
| Xenopus_Silurana_tropicalis |            |             |             |             |            |             |            |      |
| L_XT                        | CATTANNANT | TNACTCCANC  | AGANNTTGCA  | TNTTAATNCT  | GGGGAAAAAN | TNTNAGNTNN  | NGAGGTANTA | 809  |
| Takifugu_rubripes           |            |             |             |             |            |             |            |      |
| Bos_taurus                  |            |             |             |             |            |             |            |      |
| Homo_sapiens                |            |             |             |             |            |             |            |      |
| Microcebus_murinus          |            |             |             |             |            |             |            |      |
| Myotis_lucifugus            |            |             |             |             |            |             |            |      |
| Equus_caballus              |            |             |             |             |            |             |            |      |
| Tupaia_belangeri            |            |             |             |             |            |             |            |      |
| Loxodonta_africana          |            |             |             |             |            |             |            |      |
| Murinae                     |            |             |             |             |            |             |            |      |
| Canis_lupus_familiaris      |            |             |             |             |            |             |            |      |
| Sus_scrofa                  |            |             |             |             |            |             |            |      |
| Choloepus_hoffmanni         |            |             |             |             |            |             |            |      |
| Vicugna_pacos               |            |             |             |             |            |             |            |      |
| Gavialis_gangeticus         |            |             |             |             |            |             |            |      |
| Mammalia                    |            |             |             |             |            |             |            |      |
| Passeroidea                 |            |             |             |             |            |             |            |      |
| Takifugu                    |            |             |             |             |            |             |            |      |
| Pteropus_vampyrus           |            |             |             |             |            |             |            |      |
| Ornithorhynchus             |            |             |             |             |            |             |            |      |
| Oryctolagus_cuniculus       |            |             |             |             |            |             |            |      |
| Gallus_gallus               |            |             |             |             |            |             |            |      |
| Hominidae                   |            |             |             |             |            |             |            |      |
| Metatheria                  |            |             |             |             |            |             |            |      |
| Rodentia                    |            |             |             |             |            |             |            |      |
| Monodelphis                 |            |             |             |             |            |             |            |      |
| Consensus                   |            |             |             |             |            |             |            |      |
| Conservation                | 100%       |             |             |             |            |             |            |      |
|                             | 0%         |             |             |             |            |             |            |      |

|                             | 1,340        | 1,360      | 1,380      | 1,400         |             |              |                |      |
|-----------------------------|--------------|------------|------------|---------------|-------------|--------------|----------------|------|
| Dipodomys_ordii             |              |            |            |               |             |              |                |      |
| Laurasiatheria              |              |            |            |               |             |              |                |      |
| Eutheria                    |              |            |            |               |             |              |                |      |
| Tarsius_syricha             |              |            |            |               |             |              |                |      |
| Muridae                     |              |            |            |               |             |              |                |      |
| Gasterosteus_aculeatus      |              |            |            |               |             |              |                |      |
| Felis_silvestris            |              |            |            |               |             |              |                |      |
| Rattus                      |              |            |            |               |             |              |                |      |
| Papio_hamadryas             |              |            |            |               |             |              |                |      |
| Pan_troglodytes             |              |            |            |               |             |              |                |      |
| Ailuropoda_melanoleuca      |              |            |            |               |             |              |                |      |
| Cavia_porcellus             |              |            |            |               |             |              |                |      |
| Ictidomys_tridecemlineatus  |              |            |            |               |             |              |                |      |
| Canis                       |              |            |            |               |             |              |                |      |
| Felis_catus                 |              |            |            |               |             |              |                |      |
| Ochotona_princeps           |              |            |            |               |             |              |                |      |
| Cercopithecidae             |              |            |            |               |             |              |                |      |
| Carnivora                   |              |            |            |               |             |              |                |      |
| Mus                         |              |            |            |               |             |              |                |      |
| Mus_musculus                |              |            |            |               |             |              |                |      |
| Rattus_norvegicus           |              |            |            |               |             |              |                |      |
| Tursiops_truncatus          |              |            |            |               |             |              |                |      |
| Procapra_capensis           |              |            |            |               |             |              |                |      |
| Primates                    |              |            |            |               |             |              |                |      |
| Echinops_telfairi           |              |            |            |               |             |              |                |      |
| Sorex_araneus               |              |            |            |               |             |              |                |      |
| Canidae                     |              |            |            |               |             |              |                |      |
| Otolemur_garnettii          |              |            |            |               |             |              |                |      |
| Gallus                      |              |            |            |               |             |              |                |      |
| Callithrix_jacchus          |              |            |            |               |             |              |                |      |
| Crocodylus_porosus          |              |            |            |               |             |              |                |      |
| Erinaceus_europaeus         |              |            |            |               |             |              |                |      |
| rnd-6_family-7426-LTR-ERV1  |              |            |            |               |             |              |                |      |
| Esox_lucius                 |              |            |            |               |             |              |                |      |
| Salmo_salar                 |              |            |            |               |             |              |                |      |
| Didelphidae                 |              |            |            |               |             |              |                |      |
| Latimeria_chalumnae         |              |            |            |               |             |              |                |      |
| Monodelphis_domestica       |              |            |            |               |             |              |                |      |
| Macropus_eugenii            |              |            |            |               |             |              |                |      |
| Alligator_mississippiensis  |              |            |            |               |             |              |                |      |
| Chrysemys_picta_bellii      |              |            |            |               |             |              |                |      |
| Danio_rerio                 |              |            |            |               |             |              |                |      |
| Taeniopygia                 |              |            |            |               |             |              |                |      |
| Dasybus_novemcinctus        |              |            |            |               |             |              |                |      |
| LTR_XT                      |              |            |            |               |             |              |                |      |
| Haplorrhini                 | ATGTTCCAAT   | TTACCCATCT | CTGGCAAGGC | TTAGGCAGGA    | AGCCAACCTCA | GCAGCTGCCT   | CCGGAGGGTC     | 1396 |
| Catarrhini                  | GTACCAGCAG   | TACCCCTCC  | TTATCGAGAG | GAAGG - GCT   | CCCCACCCCT  | GAGCCACAG    | CACCTACACC     | 1033 |
| Anolis_carolinensis         |              |            |            |               |             |              |                |      |
| Murine_leukemia_virus       | TAAGCCCCAG   | GTTCTCCCCG | ATAGCGGC   | - - - - - GGA | CCTCTCATTG  | ACCTTCTCAC   | AGAGGACCCC     | 985  |
| Phascolarctos_cinereus      | T - - - CTAG | AACCCCGGC  | CTATCCA    | - - - - - A   | CGTCCCCTCC  | ACCTCCCC - C | AG - - - - CCC | 913  |
| Estrildidae                 |              |            |            |               |             |              |                |      |
| Xenopus_Silurana_tropicalis |              |            |            |               |             |              |                |      |
| LTR_XT                      | AANACCNNGN   | NAATCANNNC | ANGAANATCG | TTATNCNTNN    | NTNNNTNTAN  | TNGAACTTNC   | TTNTAGAANG     | 879  |
| Takifugu_rubripes           |              |            |            |               |             |              |                |      |
| Bos_taurus                  |              |            |            |               |             |              |                |      |
| Homo_sapiens                |              |            |            |               |             |              |                |      |
| Microcebus_murinus          |              |            |            |               |             |              |                |      |
| Myotis_lucifugus            |              |            |            |               |             |              |                |      |
| Equus_caballus              |              |            |            |               |             |              |                |      |
| Tupaia_belangeri            |              |            |            |               |             |              |                |      |
| Loxodonta_africana          |              |            |            |               |             |              |                |      |
| Murinae                     |              |            |            |               |             |              |                |      |
| Canis_lupus_familiaris      |              |            |            |               |             |              |                |      |
| Sus_scrofa                  |              |            |            |               |             |              |                |      |
| Choloepus_hoffmanni         |              |            |            |               |             |              |                |      |
| Vicugna_pacos               |              |            |            |               |             |              |                |      |
| Gavialis_gangeticus         |              |            |            |               |             |              |                |      |
| Mammalia                    |              |            |            |               |             |              |                |      |
| Passeroidea                 |              |            |            |               |             |              |                |      |
| Takifugu                    |              |            |            |               |             |              |                |      |
| Pteropus_vampyrus           |              |            |            |               |             |              |                |      |
| Ornithorhynchus             |              |            |            |               |             |              |                |      |
| Oryctolagus_cuniculus       |              |            |            |               |             |              |                |      |
| Gallus_gallus               |              |            |            |               |             |              |                |      |
| Hominidae                   |              |            |            |               |             |              |                |      |
| Metatheria                  |              |            |            |               |             |              |                |      |
| Rodentia                    |              |            |            |               |             |              |                |      |
| Monodelphis                 |              |            |            |               |             |              |                |      |
| Consensus                   |              |            |            |               |             |              |                |      |
| Conservation                | 100%         |            |            |               |             |              |                | 0%   |



|                             | 1,420      |            |            | 1,440      |            |            | 1,460      |  |      |  |
|-----------------------------|------------|------------|------------|------------|------------|------------|------------|--|------|--|
| Dipodomys_ordii             |            |            |            |            |            |            |            |  |      |  |
| Laurasiatheria              |            |            |            |            |            |            |            |  |      |  |
| Eutheria                    |            |            |            |            |            |            |            |  |      |  |
| Tarsius_syricha             |            |            |            |            |            |            |            |  |      |  |
| Muridae                     |            |            |            |            |            |            |            |  |      |  |
| Gasterosteus_aculeatus      |            |            |            |            |            |            |            |  |      |  |
| Felis_silvestris            |            |            |            |            |            |            |            |  |      |  |
| Rattus                      |            |            |            |            |            |            |            |  |      |  |
| Papio_hamadryas             |            |            |            |            |            |            |            |  |      |  |
| Pan_troglodytes             |            |            |            |            |            |            |            |  |      |  |
| Ailuropoda_melanoleuca      |            |            |            |            |            |            |            |  |      |  |
| Cavia_porcellus             |            |            |            |            |            |            |            |  |      |  |
| Ictidomys_tridecemlineatus  |            |            |            |            |            |            |            |  |      |  |
| Canis                       |            |            |            |            |            |            |            |  |      |  |
| Felis_catus                 |            |            |            |            |            |            |            |  |      |  |
| Ochotona_princeps           |            |            |            |            |            |            |            |  |      |  |
| Cercopithecidae             |            |            |            |            |            |            |            |  |      |  |
| Carnivora                   |            |            |            |            |            |            |            |  |      |  |
| Mus                         |            |            |            |            |            |            |            |  |      |  |
| Mus_musculus                |            |            |            |            |            |            |            |  |      |  |
| Rattus_norvegicus           |            |            |            |            |            |            |            |  |      |  |
| Tursiops_truncatus          |            |            |            |            |            |            |            |  |      |  |
| Procapra_capensis           |            |            |            |            |            |            |            |  |      |  |
| Primates                    |            |            |            |            |            |            |            |  |      |  |
| Echinops_telfairi           |            |            |            |            |            |            |            |  |      |  |
| Sorex_araneus               |            |            |            |            |            |            |            |  |      |  |
| Canidae                     |            |            |            |            |            |            |            |  |      |  |
| Otomomys_garnettii          |            |            |            |            |            |            |            |  |      |  |
| Gallus                      |            |            |            |            |            |            |            |  |      |  |
| Callithrix_jacchus          |            |            |            |            |            |            |            |  |      |  |
| Crocodylus_porosus          |            |            |            |            |            |            |            |  |      |  |
| Erinaceus_europaeus         |            |            |            |            |            |            |            |  |      |  |
| rnd-6_family-7426-LTR-ERV1  |            |            |            |            |            |            |            |  |      |  |
| Esox_lucius                 |            |            |            |            |            |            |            |  |      |  |
| Salmo_salar                 |            |            |            |            |            |            |            |  |      |  |
| Didelphidae                 |            |            |            |            |            |            |            |  |      |  |
| Latimeria_chalumnae         |            |            |            |            |            |            |            |  |      |  |
| Monodelphis_domestica       |            |            |            |            |            |            |            |  |      |  |
| Macropus_eugenii            |            |            |            |            |            |            |            |  |      |  |
| Alligator_mississippiensis  |            |            |            |            |            |            |            |  |      |  |
| Chrysemys_picta_bellii      |            |            |            |            |            |            |            |  |      |  |
| Danio_rerio                 |            |            |            |            |            |            |            |  |      |  |
| Taeniopygia                 |            |            |            |            |            |            |            |  |      |  |
| Dasyus_novemcinctus         |            |            |            |            |            |            |            |  |      |  |
| LTR_XT                      |            |            |            |            |            |            |            |  |      |  |
| Haplorrhini                 | GGACTCAGAG | GAGAGTACCC | CCCAAACCTC | ACCACGTAGG | GAAGAGCCAG | GGCCACTGCC | CGATAAATCA |  | 1466 |  |
| Catarrhini                  | TCCACCAGAT | AACACACCC  | CT-AGACCAC | CCAGAGTAGA | CAAAAG--AG | GA--AGTG-- | ----AAGCCG |  | 1092 |  |
| Anolis_carolinensis         |            |            |            |            |            |            |            |  |      |  |
| Murine_leukemia_virus       | CCGCCGTACG | GAGNACAGGG | ACCNTCCTCC | T--CTGNCGG | AGANGGCGAC | GGAGAAGA-- | ----GGCCG  |  | 1046 |  |
| Phascolarctos_cinereus      | CTCACGCGGC | CAGACCAGG  | CCAGGCCTAA | TGGCTGAGGG | ACTCGGCTCT | GAGGGACC-- | ----GGCCG  |  | 976  |  |
| Estrildidae                 |            |            |            |            |            |            |            |  |      |  |
| Xenopus_Silurana_tropicalis |            |            |            |            |            |            |            |  |      |  |
| L_XT                        | GTTANGNGAA | NTCNNNATGN | GNAAGNNCCN | GNANNGATGN | ATCTNATGNT | NGTAATNGAA | NTGNANCTT  |  | 949  |  |
| Takifugu_rubripes           |            |            |            |            |            |            |            |  |      |  |
| Bos_taurus                  |            |            |            |            |            |            |            |  |      |  |
| Homo_sapiens                |            |            |            |            |            |            |            |  |      |  |
| Microcebus_murinus          |            |            |            |            |            |            |            |  |      |  |
| Myotis_lucifugus            |            |            |            |            |            |            |            |  |      |  |
| Equus_caballus              |            |            |            |            |            |            |            |  |      |  |
| Tupaia_belangeri            |            |            |            |            |            |            |            |  |      |  |
| Loxodonta_africana          |            |            |            |            |            |            |            |  |      |  |
| Murinae                     |            |            |            |            |            |            |            |  |      |  |
| Canis_lupus_familiaris      |            |            |            |            |            |            |            |  |      |  |
| Sus_scrofa                  |            |            |            |            |            |            |            |  |      |  |
| Choloepus_hoffmanni         |            |            |            |            |            |            |            |  |      |  |
| Vicugna_pacos               |            |            |            |            |            |            |            |  |      |  |
| Gavialis_gangeticus         |            |            |            |            |            |            |            |  |      |  |
| Mammalia                    |            |            |            |            |            |            |            |  |      |  |
| Passeroidea                 |            |            |            |            |            |            |            |  |      |  |
| Takifugu                    |            |            |            |            |            |            |            |  |      |  |
| Pteropus_vampyrus           |            |            |            |            |            |            |            |  |      |  |
| Ornithorhynchus             |            |            |            |            |            |            |            |  |      |  |
| Oryctolagus_cuniculus       |            |            |            |            |            |            |            |  |      |  |
| Gallus_gallus               |            |            |            |            |            |            |            |  |      |  |
| Hominidae                   |            |            |            |            |            |            |            |  |      |  |
| Metatheria                  |            |            |            |            |            |            |            |  |      |  |
| Rodentia                    |            |            |            |            |            |            |            |  |      |  |
| Monodelphis                 |            |            |            |            |            |            |            |  |      |  |
| Consensus                   |            |            |            |            |            |            |            |  |      |  |
| Conservation                | 100%       |            |            |            |            |            |            |  |      |  |
|                             | 0%         |            |            |            |            |            |            |  |      |  |

|                             | 1,480      | 1,500              | 1,520      | 1,540      |            |            |            |      |
|-----------------------------|------------|--------------------|------------|------------|------------|------------|------------|------|
| Dipodomys_ordii             | -          | -                  | -          | -          | -          |            |            |      |
| Laurasiatheria              | -          | -                  | -          | -          | -          |            |            |      |
| Eutheria                    | -          | -                  | -          | -          | -          |            |            |      |
| Tarsius_syricha             | -          | -                  | -          | -          | -          |            |            |      |
| Muridae                     | -          | -                  | -          | -          | -          |            |            |      |
| Gasterosteus_aculeatus      | -          | -                  | -          | -          | -          |            |            |      |
| Felis_silvestris            | -          | -                  | -          | -          | -          |            |            |      |
| Rattus                      | -          | -                  | -          | -          | -          |            |            |      |
| Papio_hamadryas             | -          | -                  | -          | -          | -          |            |            |      |
| Pan_troglodytes             | -          | -                  | -          | -          | -          |            |            |      |
| Ailuropoda_melanoleuca      | -          | -                  | -          | -          | -          |            |            |      |
| Cavia_porcellus             | -          | -                  | -          | -          | -          |            |            |      |
| Ictidomys_tridecemlineatus  | -          | -                  | -          | -          | -          |            |            |      |
| Canis                       | -          | -                  | -          | -          | -          |            |            |      |
| Felis_catus                 | -          | -                  | -          | -          | -          |            |            |      |
| Ochotona_princeps           | -          | -                  | -          | -          | -          |            |            |      |
| Cercopithecidae             | -          | -                  | -          | -          | -          |            |            |      |
| Carnivora                   | -          | -                  | -          | -          | -          |            |            |      |
| Mus                         | -          | -                  | -          | -          | -          |            |            |      |
| Mus_musculus                | -          | -                  | -          | -          | -          |            |            |      |
| Rattus_norvegicus           | -          | -                  | -          | -          | -          |            |            |      |
| Tursiops_truncatus          | -          | -                  | -          | -          | -          |            |            |      |
| Procyon_capensis            | -          | -                  | -          | -          | -          |            |            |      |
| Primates                    | -          | -                  | -          | -          | -          |            |            |      |
| Echinops_telfairi           | -          | -                  | -          | -          | -          |            |            |      |
| Sorex_araneus               | -          | -                  | -          | -          | -          |            |            |      |
| Canidae                     | -          | -                  | -          | -          | -          |            |            |      |
| Otomomys_garnettii          | -          | -                  | -          | -          | -          |            |            |      |
| Gallus                      | -          | -                  | -          | -          | -          |            |            |      |
| Callithrix_jacchus          | -          | -                  | -          | -          | -          |            |            |      |
| Crocodylus_porosus          | -          | -                  | -          | -          | -          |            |            |      |
| Erinaceus_europaeus         | -          | -                  | -          | -          | -          |            |            |      |
| rnd-6_family-7426-LTR-ERV1  | -          | -                  | -          | -          | -          |            |            |      |
| Esox_lucius                 | -          | -                  | -          | -          | -          |            |            |      |
| Salmo_salar                 | -          | -                  | -          | -          | -          |            |            |      |
| Didelphidae                 | -          | -                  | -          | -          | -          |            |            |      |
| Latimeria_chalumnae         | -          | -                  | -          | -          | -          |            |            |      |
| Monodelphis_domestica       | -          | -                  | -          | -          | -          |            |            |      |
| Macropus_eugenii            | -          | -                  | -          | -          | -          |            |            |      |
| Alligator_mississippiensis  | -          | -                  | -          | -          | -          |            |            |      |
| Chrysemys_picta_bellii      | -          | -                  | -          | -          | -          |            |            |      |
| Danio_rerio                 | -          | -                  | -          | -          | -          |            |            |      |
| Taeniopygia                 | -          | -                  | -          | -          | -          |            |            |      |
| Dasyus_novemcinctus         | -          | -                  | -          | -          | -          |            |            |      |
| LTR_XT                      | -          | -                  | -          | -          | -          |            |            |      |
| Haplorrhini                 | AAGGAGGAAC | TCCAGGATGA         | GGTTGGCCGT | CTCCGGTCAG | GACGCGCCCG | AGCCATGCAG | ATGCCCTCA  | 1536 |
| Catarrhini                  | CGGGAGAAAC | TCCTCCGTT-         | GGCAGCTCGC | TTACGGCC-- | --CGAGACTG | GA--ATCCAA | ATGCCCTGA  | 1155 |
| Anolis_carolinensis         | -          | -                  | -          | -          | -          | -          | -          | -    |
| Murine_leukemia_virus       | CCNCCACCTC | CGAGGTTCCC         | GCCCCCTCTC | CCATGGTGTC | TCGNTGCGG  | GGNAGGAGGG | ACCCCCCGC  | 1116 |
| Phascolarctos_cinereus      | CTGGAACATA | -GGAGTCGCC         | GTCCC----- | -CGCAGTCCT | ACGGGTG-AC | ACTGGTCCTG | ACTCCACTGT | 1037 |
| Estrildidae                 | -          | -                  | -          | -          | -          | -          | -          | -    |
| Xenopus_Silurana_tropicalis | -          | -                  | -          | -          | -          | -          | -          | -    |
| L_XT                        | TTGACNCTGN | NGNGGNTNTA         | TTGNCGTNAA | ATNTAATNAN | GNTNGAGNTT | ANNGCANNTT | TCATNNANAN | 1019 |
| Takifugu_rubripes           | -          | -                  | -          | -          | -          | -          | -          | -    |
| Bos_taurus                  | -          | -                  | -          | -          | -          | -          | -          | -    |
| Homo_sapiens                | -          | -                  | -          | -          | -          | -          | -          | -    |
| Microcebus_murinus          | -          | -                  | -          | -          | -          | -          | -          | -    |
| Myotis_lucifugus            | -          | -                  | -          | -          | -          | -          | -          | -    |
| Equus_caballus              | -          | -                  | -          | -          | -          | -          | -          | -    |
| Tupaia_belangeri            | -          | -                  | -          | -          | -          | -          | -          | -    |
| Loxodonta_africana          | -          | -                  | -          | -          | -          | -          | -          | -    |
| Murinae                     | -          | -                  | -          | -          | -          | -          | -          | -    |
| Canis_lupus_familiaris      | -          | -                  | -          | -          | -          | -          | -          | -    |
| Sus_scrofa                  | -          | -                  | -          | -          | -          | -          | -          | -    |
| Choloepus_hoffmanni         | -          | -                  | -          | -          | -          | -          | -          | -    |
| Vicugna_pacos               | -          | -                  | -          | -          | -          | -          | -          | -    |
| Gavialis_gangeticus         | -          | -                  | -          | -          | -          | -          | -          | -    |
| Mammalia                    | -          | -                  | -          | -          | -          | -          | -          | -    |
| Passeroidea                 | -          | -                  | -          | -          | -          | -          | -          | -    |
| Takifugu                    | -          | -                  | -          | -          | -          | -          | -          | -    |
| Pteropus_vampyrus           | -          | -                  | -          | -          | -          | -          | -          | -    |
| Ornithorhynchus             | -          | -                  | -          | -          | -          | -          | -          | -    |
| Oryctolagus_cuniculus       | -          | -                  | -          | -          | -          | -          | -          | -    |
| Gallus_gallus               | -          | -                  | -          | -          | -          | -          | -          | -    |
| Hominidae                   | -          | -                  | -          | -          | -          | -          | -          | -    |
| Metatheria                  | -          | -                  | -          | -          | -          | -          | -          | -    |
| Rodentia                    | -          | -                  | -          | -          | -          | -          | -          | -    |
| Monodelphis                 | -          | -                  | -          | -          | -          | -          | -          | -    |
| Consensus                   | -          | -                  | -          | -          | -          | -          | -          | -    |
| Conservation                | 100%       | [Conservation bar] |            |            |            |            |            | 0%   |

|                             | 1,560          | 1,580      | 1,600      |            |             |              |                     |
|-----------------------------|----------------|------------|------------|------------|-------------|--------------|---------------------|
| Dipodomys_ordii             |                |            |            |            |             |              |                     |
| Laurasiatheria              |                |            |            |            |             |              |                     |
| Eutheria                    |                |            |            |            |             |              |                     |
| Tarsius_syrichta            |                |            |            |            |             |              |                     |
| Muridae                     |                |            |            |            |             |              |                     |
| Gasterosteus_aculeatus      |                |            |            |            |             |              |                     |
| Felis_silvestris            |                |            |            |            |             |              |                     |
| Rattus                      |                |            |            |            |             |              |                     |
| Papio_hamadryas             |                |            |            |            |             |              |                     |
| Pan_troglodytes             |                |            |            |            |             |              |                     |
| Ailuropoda_melanoleuca      |                |            |            |            |             |              |                     |
| Cavia_porcellus             |                |            |            |            |             |              |                     |
| Ictidomys_tridecemlineatus  |                |            |            |            |             |              |                     |
| Canis                       |                |            |            |            |             |              |                     |
| Felis_catus                 |                |            |            |            |             |              |                     |
| Ochotona_princeps           |                |            |            |            |             |              |                     |
| Cercopithecidae             |                |            |            |            |             |              |                     |
| Carnivora                   |                |            |            |            |             |              |                     |
| Mus                         |                |            |            |            |             |              |                     |
| Mus_musculus                |                |            |            |            |             |              |                     |
| Rattus_norvegicus           |                |            |            |            |             |              |                     |
| Tursiops_truncatus          |                |            |            |            |             |              |                     |
| Procapra_capensis           |                |            |            |            |             |              |                     |
| Primates                    |                |            |            |            |             |              |                     |
| Echinops_telfairi           |                |            |            |            |             |              |                     |
| Sorex_araneus               |                |            |            |            |             |              |                     |
| Canidae                     |                |            |            |            |             |              |                     |
| Otomomys_garnettii          |                |            |            |            |             |              |                     |
| Gallus                      |                |            |            |            |             |              |                     |
| Callithrix_jacchus          |                |            |            |            |             |              |                     |
| Crocodylus_porosus          |                |            |            |            |             |              |                     |
| Erinaceus_europaeus         |                |            |            |            |             |              |                     |
| rnd-6_family-7426-LTR-ERV1  |                |            |            |            |             |              |                     |
| Esox_lucius                 |                |            |            |            |             |              |                     |
| Salmo_salar                 |                |            |            |            |             |              |                     |
| Didelphidae                 |                |            |            |            |             |              |                     |
| Latimeria_chalumnae         |                |            |            |            |             |              |                     |
| Monodelphis_domestica       |                |            |            |            |             |              |                     |
| Macropus_eugenii            |                |            |            |            |             |              |                     |
| Alligator_mississippiensis  |                |            |            |            |             |              |                     |
| Chrysemys_picta_bellii      |                |            |            |            |             |              |                     |
| Danio_rerio                 |                |            |            |            |             |              |                     |
| Taeniopygia                 |                |            |            |            |             |              |                     |
| Dasyus_novemcinctus         |                |            |            |            |             |              |                     |
| LTR_XT                      |                |            |            |            |             |              |                     |
| Haplorrhini                 | GAGAAACTAG     | AGGACAGATC | TATTTAGATG | CACAAAATGA | GGTTCAAAGGA | GGAGAA - CGG | CTTTATGTTT 1605     |
| Catarrhini                  | GAG - - - - -  | AGCAGCGATA | TACTGGGGTA | GATGAGGACG | GACACATGGT  | GGAAAGGCGT   | GCCTTTGTGT 1218     |
| Anolis_carolinensis         |                |            |            |            |             |              |                     |
| Murine_leukemia_virus       | GGC - - - - GG | ACTCCACNC  | CTCCCGGGC  | TTCCCACTCC | GTNTGGGGGG  | NGATGGCCAG   | CTNCA - - - GT 1178 |
| Phascolarctos_cinereus      | GGC - - - - CC | TGCCCTCCG  | GGCCGTGGGA | CCCCCGGCC  | AACCAAACGG  | CTTAGTCCCC   | TTGCA - - - AT 1099 |
| Estrildidae                 |                |            |            |            |             |              |                     |
| Xenopus_Silurana_tropicalis |                |            |            |            |             |              |                     |
| L_XT                        | ATNACAAGAC     | TANTAAATGT | AAATGATANA | GNTAANATAN | ATGCANTTAC  | TAAATTANCA   | CNTAAANANA 1089     |
| Takifugu_rubripes           |                |            |            |            |             |              |                     |
| Bos_taurus                  |                |            |            |            |             |              |                     |
| Homo_sapiens                |                |            |            |            |             |              |                     |
| Microcebus_murinus          |                |            |            |            |             |              |                     |
| Myotis_lucifugus            |                |            |            |            |             |              |                     |
| Equus_caballus              |                |            |            |            |             |              |                     |
| Tupaia_belangeri            |                |            |            |            |             |              |                     |
| Loxodonta_africana          |                |            |            |            |             |              |                     |
| Murinae                     |                |            |            |            |             |              |                     |
| Canis_lupus_familiaris      |                |            |            |            |             |              |                     |
| Sus_scrofa                  |                |            |            |            |             |              |                     |
| Choloepus_hoffmanni         |                |            |            |            |             |              |                     |
| Vicugna_pacos               |                |            |            |            |             |              |                     |
| Gavialis_gangeticus         |                |            |            |            |             |              |                     |
| Mammalia                    |                |            |            |            |             |              |                     |
| Passeroidea                 |                |            |            |            |             |              |                     |
| Takifugu                    |                |            |            |            |             |              |                     |
| Pteropus_vampyrus           |                |            |            |            |             |              |                     |
| Ornithorhynchus             |                |            |            |            |             |              |                     |
| Oryctolagus_cuniculus       |                |            |            |            |             |              |                     |
| Gallus_gallus               |                |            |            |            |             |              |                     |
| Hominidae                   |                |            |            |            |             |              |                     |
| Metatheria                  |                |            |            |            |             |              |                     |
| Rodentia                    |                |            |            |            |             |              |                     |
| Monodelphis                 |                |            |            |            |             |              |                     |
| Consensus                   |                |            |            |            |             |              |                     |
| Conservation                | 100%           |            |            |            |             |              | 0%                  |

|                             | 1,620      | 1,640      | 1,660      | 1,680      |            |            |            |      |
|-----------------------------|------------|------------|------------|------------|------------|------------|------------|------|
| Dipodomys_ordii             | -          | -          | -          | -          | -          |            |            |      |
| Laurasiatheria              | -          | -          | -          | -          | -          |            |            |      |
| Eutheria                    | -          | -          | -          | -          | -          |            |            |      |
| Tarsius_syrichta            | -          | -          | -          | -          | -          |            |            |      |
| Muridae                     | -          | -          | -          | -          | -          |            |            |      |
| Gasterosteus_aculeatus      | -          | -          | -          | -          | -          |            |            |      |
| Felis_silvestris            | -          | -          | -          | -          | -          |            |            |      |
| Rattus                      | -          | -          | -          | -          | -          |            |            |      |
| Papio_hamadryas             | -          | -          | -          | -          | -          |            |            |      |
| Pan_troglodytes             | -          | -          | -          | -          | -          |            |            |      |
| Ailuropoda_melanoleuca      | -          | -          | -          | -          | -          |            |            |      |
| Cavia_porcellus             | -          | -          | -          | -          | -          |            |            |      |
| Ictidomys_tridecemlineatus  | -          | -          | -          | -          | -          |            |            |      |
| Canis                       | -          | -          | -          | -          | -          |            |            |      |
| Felis_catus                 | -          | -          | -          | -          | -          |            |            |      |
| Ochotona_princeps           | -          | -          | -          | -          | -          |            |            |      |
| Cercopithecidae             | -          | -          | -          | -          | -          |            |            |      |
| Carnivora                   | -          | -          | -          | -          | -          |            |            |      |
| Mus                         | -          | -          | -          | -          | -          |            |            |      |
| Mus_musculus                | -          | -          | -          | -          | -          |            |            |      |
| Rattus_norvegicus           | -          | -          | -          | -          | -          |            |            |      |
| Tursiops_truncatus          | -          | -          | -          | -          | -          |            |            |      |
| Procapra_capensis           | -          | -          | -          | -          | -          |            |            |      |
| Primates                    | -          | -          | -          | -          | -          |            |            |      |
| Echinops_telfairi           | -          | -          | -          | -          | -          |            |            |      |
| Sorex_araneus               | -          | -          | -          | -          | -          |            |            |      |
| Canidae                     | -          | -          | -          | -          | -          |            |            |      |
| Otomomys_garnettii          | -          | -          | -          | -          | -          |            |            |      |
| Gallus                      | -          | -          | -          | -          | -          |            |            |      |
| Callithrix_jacchus          | -          | -          | -          | -          | -          |            |            |      |
| Crocodylus_porosus          | -          | -          | -          | -          | -          |            |            |      |
| Erinaceus_europaeus         | -          | -          | -          | -          | -          |            |            |      |
| rnd-6_family-7426-LTR-ERV1  | -          | -          | -          | -          | -          |            |            |      |
| Esox_lucius                 | -          | -          | -          | -          | -          |            |            |      |
| Salmo_salar                 | -          | -          | -          | -          | -          |            |            |      |
| Didelphidae                 | -          | -          | -          | -          | -          |            |            |      |
| Latimeria_chalumnae         | -          | -          | -          | -          | -          |            |            |      |
| Monodelphis_domestica       | -          | -          | -          | -          | -          |            |            |      |
| Macropus_eugenii            | -          | -          | -          | -          | -          |            |            |      |
| Alligator_mississippiensis  | -          | -          | -          | -          | -          |            |            |      |
| Chrysemys_picta_bellii      | -          | -          | -          | -          | -          |            |            |      |
| Danio_rerio                 | -          | -          | -          | -          | -          |            |            |      |
| Taeniopygia                 | -          | -          | -          | -          | -          |            |            |      |
| Dasyus_novemcinctus         | -          | -          | -          | -          | -          |            |            |      |
| LTR_XT                      | -          | -          | -          | -          | -          |            |            |      |
| Haplorrhini                 | ATCAGCCCTT | CTCTACTACA | GACATTTTCA | ACTGGAAGCA | GCATACTCCC | TCCTATACGG | AAAAACCCCA | 1675 |
| Catarrhini                  | ATCAACCTTT | CAGCTCTGCT | GACCTCCTCA | ATTGGAAAAA | TAATACTCCA | TCTTACACTG | AAAAGCCTCA | 1288 |
| Anolis_carolinensis         | -          | -          | -          | -          | -          | -          | -          | -    |
| Murine_leukemia_virus       | ACTGGCCGTT | TTCTCTCTCN | GACCTATACA | ACTGGAAAAA | TAATAACCTT | TCCTTTTCTG | AGATCCAGG  | 1248 |
| Phascolarctos_cinereus      | ATTGGCCCTT | CTCCTCAGCA | GATCTCTATA | ATTGGAAATC | TAATCATCCT | TCTTTTTCGG | AGAATCCTAC | 1169 |
| Estrildidae                 | -          | -          | -          | -          | -          | -          | -          | -    |
| Xenopus_Silurana_tropicalis | -          | -          | -          | -          | -          | -          | -          | -    |
| LTR_XT                      | NNTATANNTA | ANCAGNTCAN | AATNAAAGAA | ATNNNAATNC | NNAAGACANG | NCNACTACAN | GNTTTCAAAG | 1159 |
| Takifugu_rubripes           | -          | -          | -          | -          | -          | -          | -          | -    |
| Bos_taurus                  | -          | -          | -          | -          | -          | -          | -          | -    |
| Homo_sapiens                | -          | -          | -          | -          | -          | -          | -          | -    |
| Microcebus_murinus          | -          | -          | -          | -          | -          | -          | -          | -    |
| Myotis_lucifugus            | -          | -          | -          | -          | -          | -          | -          | -    |
| Equus_caballus              | -          | -          | -          | -          | -          | -          | -          | -    |
| Tupaia_belangeri            | -          | -          | -          | -          | -          | -          | -          | -    |
| Loxodonta_africana          | -          | -          | -          | -          | -          | -          | -          | -    |
| Murinae                     | -          | -          | -          | -          | -          | -          | -          | -    |
| Canis_lupus_familiaris      | -          | -          | -          | -          | -          | -          | -          | -    |
| Sus_scrofa                  | -          | -          | -          | -          | -          | -          | -          | -    |
| Choloepus_hoffmanni         | -          | -          | -          | -          | -          | -          | -          | -    |
| Vicugna_pacos               | -          | -          | -          | -          | -          | -          | -          | -    |
| Gavialis_gangeticus         | -          | -          | -          | -          | -          | -          | -          | -    |
| Mammalia                    | -          | -          | -          | -          | -          | -          | -          | -    |
| Passeroidea                 | -          | -          | -          | -          | -          | -          | -          | -    |
| Takifugu                    | -          | -          | -          | -          | -          | -          | -          | -    |
| Pteropus_vampyrus           | -          | -          | -          | -          | -          | -          | -          | -    |
| Ornithorhynchus             | -          | -          | -          | -          | -          | -          | -          | -    |
| Oryctolagus_cuniculus       | -          | -          | -          | -          | -          | -          | -          | -    |
| Gallus_gallus               | -          | -          | -          | -          | -          | -          | -          | -    |
| Hominidae                   | -          | -          | -          | -          | -          | -          | -          | -    |
| Metatheria                  | -          | -          | -          | -          | -          | -          | -          | -    |
| Rodentia                    | -          | -          | -          | -          | -          | -          | -          | -    |
| Monodelphis                 | -          | -          | -          | -          | -          | -          | -          | -    |
| Consensus                   | -          | -          | -          | -          | -          | -          | -          | -    |
| Conservation                | 100%       |            |            |            |            |            |            | 0%   |

|                             | 1,700      | 1,720      | 1,740      |            |            |            |            |      |
|-----------------------------|------------|------------|------------|------------|------------|------------|------------|------|
| Dipodomys_ordii             |            |            |            |            |            |            |            |      |
| Laurasiatheria              |            |            |            |            |            |            |            |      |
| Eutheria                    |            |            |            |            |            |            |            |      |
| Tarsius_syricha             |            |            |            |            |            |            |            |      |
| Muridae                     |            |            |            |            |            |            |            |      |
| Gasterosteus_aculeatus      |            |            |            |            |            |            |            |      |
| Felis_silvestris            |            |            |            |            |            |            |            |      |
| Rattus                      |            |            |            |            |            |            |            |      |
| Papio_hamadryas             |            |            |            |            |            |            |            |      |
| Pan_troglodytes             |            |            |            |            |            |            |            |      |
| Ailuropoda_melanoleuca      |            |            |            |            |            |            |            |      |
| Cavia_porcellus             |            |            |            |            |            |            |            |      |
| Ictidomys_tridecemlineatus  |            |            |            |            |            |            |            |      |
| Canis                       |            |            |            |            |            |            |            |      |
| Felis_catus                 |            |            |            |            |            |            |            |      |
| Ochotona_princeps           |            |            |            |            |            |            |            |      |
| Cercopithecidae             |            |            |            |            |            |            |            |      |
| Carnivora                   |            |            |            |            |            |            |            |      |
| Mus                         |            |            |            |            |            |            |            |      |
| Mus_musculus                |            |            |            |            |            |            |            |      |
| Rattus_norvegicus           |            |            |            |            |            |            |            |      |
| Tursiops_truncatus          |            |            |            |            |            |            |            |      |
| Procapra_capensis           |            |            |            |            |            |            |            |      |
| Primates                    |            |            |            |            |            |            |            |      |
| Echinops_telfairi           |            |            |            |            |            |            |            |      |
| Sorex_araneus               |            |            |            |            |            |            |            |      |
| Canidae                     |            |            |            |            |            |            |            |      |
| Otomomys_garnettii          |            |            |            |            |            |            |            |      |
| Gallus                      |            |            |            |            |            |            |            |      |
| Callithrix_jacchus          |            |            |            |            |            |            |            |      |
| Crocodylus_porosus          |            |            |            |            |            |            |            |      |
| Erinaceus_europaeus         |            |            |            |            |            |            |            |      |
| rnd-6_family-7426-LTR-ERV1  |            |            |            |            |            |            |            |      |
| Esox_lucius                 |            |            |            |            |            |            |            |      |
| Salmo_salar                 |            |            |            |            |            |            |            |      |
| Didelphidae                 |            |            |            |            |            |            |            |      |
| Latimeria_chalumnae         |            |            |            |            |            |            |            |      |
| Monodelphis_domestica       |            |            |            |            |            |            |            |      |
| Macropus_eugenii            |            |            |            |            |            |            |            |      |
| Alligator_mississippiensis  |            |            |            |            |            |            |            |      |
| Chrysemys_picta_bellii      |            |            |            |            |            |            |            |      |
| Danio_rerio                 |            |            |            |            |            |            |            |      |
| Taeniopygia                 |            |            |            |            |            |            |            |      |
| Dasyus_novemcinctus         |            |            |            |            |            |            |            |      |
| LTR_XT                      |            |            |            |            |            |            |            |      |
| Haplorrhini                 | GGCTCTTATC | GACCTAATGC | AGTCCATCTT | CTTAACTCAC | AACCCAACT  | GGGCTGACTG | CAAGCAGCTC | 1745 |
| Catarrhini                  | AGCTTTAATT | GACTTGCTCC | AAACTATTAT | ACAGACTCAT | AATCCTACTT | GGGCTGATTG | CCACCAGCTG | 1358 |
| Anolis_carolinensis         |            |            |            |            |            |            |            |      |
| Murine_leukemia_virus       | TAAATTGACN | GCCTTGATCG | AGTCCGTCCT | CATCACCCAC | CAGCCCACCT | GGGACGACTG | TCAGCAGTTG | 1318 |
| Phascolarctos_cinereus      | AGGACTTACG | GGACTCCTTG | AGTCCCTCAT | GTTTTCCCAC | CAGCCTACTT | GGGACGATTG | CCAGCAGCTC | 1239 |
| Estrildidae                 |            |            |            |            |            |            |            |      |
| Xenopus_Silurana_tropicalis |            |            |            |            |            |            |            |      |
| L_XT                        | NNNGANTTGT | CAGGGGTNCC | ATATAACGGG | NCATCNGNAG | GAGTNCNGCA | TGCGNCAGGC | AANGATANAC | 1229 |
| Takifugu_rubripes           |            |            |            |            |            |            |            |      |
| Bos_taurus                  |            |            |            |            |            |            |            |      |
| Homo_sapiens                |            |            |            |            |            |            |            |      |
| Microcebus_murinus          |            |            |            |            |            |            |            |      |
| Myotis_lucifugus            |            |            |            |            |            |            |            |      |
| Equus_caballus              |            |            |            |            |            |            |            |      |
| Tupaia_belangeri            |            |            |            |            |            |            |            |      |
| Loxodonta_africana          |            |            |            |            |            |            |            |      |
| Murinae                     |            |            |            |            |            |            |            |      |
| Canis_lupus_familiaris      |            |            |            |            |            |            |            |      |
| Sus_scrofa                  |            |            |            |            |            |            |            |      |
| Choloepus_hoffmanni         |            |            |            |            |            |            |            |      |
| Vicugna_pacos               |            |            |            |            |            |            |            |      |
| Gavialis_gangeticus         |            |            |            |            |            |            |            |      |
| Mammalia                    |            |            |            |            |            |            |            |      |
| Passeroidea                 |            |            |            |            |            |            |            |      |
| Takifugu                    |            |            |            |            |            |            |            |      |
| Pteropus_vampyrus           |            |            |            |            |            |            |            |      |
| Ornithorhynchus             |            |            |            |            |            |            |            |      |
| Oryctolagus_cuniculus       |            |            |            |            |            |            |            |      |
| Gallus_gallus               |            |            |            |            |            |            |            |      |
| Hominidae                   |            |            |            |            |            |            |            |      |
| Metatheria                  |            |            |            |            |            |            |            |      |
| Rodentia                    |            |            |            |            |            |            |            |      |
| Monodelphis                 |            |            |            |            |            |            |            |      |
| Consensus                   |            |            |            |            |            |            |            |      |
| Conservation                | 100%       |            |            |            |            |            |            |      |
|                             | 0%         |            |            |            |            |            |            |      |

|                             | 1,760      | 1,780      | 1,800      | 1,820      |            |            |            |      |
|-----------------------------|------------|------------|------------|------------|------------|------------|------------|------|
| Dipodomys_ordii             |            |            |            |            |            |            |            |      |
| Laurasiatheria              |            |            |            |            |            |            |            |      |
| Eutheria                    |            |            |            |            |            |            |            |      |
| Tarsius_syrichta            |            |            |            |            |            |            |            |      |
| Muridae                     |            |            |            |            |            |            |            |      |
| Gasterosteus_aculeatus      |            |            |            |            |            |            |            |      |
| Felis_silvestris            |            |            |            |            |            |            |            |      |
| Rattus                      |            |            |            |            |            |            |            |      |
| Papio_hamadryas             |            |            |            |            |            |            |            |      |
| Pan_troglodytes             |            |            |            |            |            |            |            |      |
| Ailuropoda_melanoleuca      |            |            |            |            |            |            |            |      |
| Cavia_porcellus             |            |            |            |            |            |            |            |      |
| Ictidomys_tridecemlineatus  |            |            |            |            |            |            |            |      |
| Canis                       |            |            |            |            |            |            |            |      |
| Felis_catus                 |            |            |            |            |            |            |            |      |
| Ochotona_princeps           |            |            |            |            |            |            |            |      |
| Cercopithecidae             |            |            |            |            |            |            |            |      |
| Carnivora                   |            |            |            |            |            |            |            |      |
| Mus                         |            |            |            |            |            |            |            |      |
| Mus_musculus                |            |            |            |            |            |            |            |      |
| Rattus_norvegicus           |            |            |            |            |            |            |            |      |
| Tursiops_truncatus          |            |            |            |            |            |            |            |      |
| Procapra_capensis           |            |            |            |            |            |            |            |      |
| Primates                    |            |            |            |            |            |            |            |      |
| Echinops_telfairi           |            |            |            |            |            |            |            |      |
| Sorex_araneus               |            |            |            |            |            |            |            |      |
| Canidae                     |            |            |            |            |            |            |            |      |
| Otolemur_garnettii          |            |            |            |            |            |            |            |      |
| Gallus                      |            |            |            |            |            |            |            |      |
| Callithrix_jacchus          |            |            |            |            |            |            |            |      |
| Crocodylus_porosus          |            |            |            |            |            |            |            |      |
| Erinaceus_europaeus         |            |            |            |            |            |            |            |      |
| rnd-6_family-7426-LTR-ERV1  |            |            |            |            |            |            |            |      |
| Esox_lucius                 |            |            |            |            |            |            |            |      |
| Salmo_salar                 |            |            |            |            |            |            |            |      |
| Didelphidae                 |            |            |            |            |            |            |            |      |
| Latimeria_chalumnae         |            |            |            |            |            |            |            |      |
| Monodelphis_domestica       |            |            |            |            |            |            |            |      |
| Macropus_eugenii            |            |            |            |            |            |            |            |      |
| Alligator_mississippiensis  |            |            |            |            |            |            |            |      |
| Chrysemys_picta_bellii      |            |            |            |            |            |            |            |      |
| Danio_rerio                 |            |            |            |            |            |            |            |      |
| Taeniopygia                 |            |            |            |            |            |            |            |      |
| Dasyus_novemcinctus         |            |            |            |            |            |            |            |      |
| LTR_XT                      |            |            |            |            |            |            |            |      |
| Haplorrhini                 | CTTCTGTCAC | TGTTCAATAC | AGAAGAACGC | TGCAGAGTAA | TACAAGCGGC | TCATCAGTGG | CTAGAAAGCA | 1815 |
| Catarrhini                  | CTCATGTACC | TCTTTAATAC | AGATGAAAGG | CGAAGGGTGC | TCCGGGTGGC | AACTAAGTGG | CTANAGGAGC | 1428 |
| Anolis_carolinensis         |            |            |            |            |            |            |            |      |
| Murine_leukemia_virus       | TTGGGGACCC | TGCTGACNNG | AGAAGAAAAG | CAGCGGGTGC | TCCTAGAGGC | TAGAAAGGCA | GTCCGGGGCC | 1388 |
| Phascolarctos_cinereus      | CTGCAAGTCC | TCTTTACCC  | CGAGGAAAAG | GAAAGGATTC | TTTTGGAGGC | TCGCAAAAAC | GTCCCTGGAG | 1309 |
| Estrildidae                 |            |            |            |            |            |            |            |      |
| Xenopus_Silurana_tropicalis |            |            |            |            |            |            |            |      |
| L_XT                        | NGCNAAAGA  | NTNANNTAGA | GANAAACNAN | TTATGAGGNA | AGCCACAGNG | CCACCTGNNA | ANATTCAAGC | 1299 |
| Takifugu_rubripes           |            |            |            |            |            |            |            |      |
| Bos_taurus                  |            |            |            |            |            |            |            |      |
| Homo_sapiens                |            |            |            |            |            |            |            |      |
| Microcebus_murinus          |            |            |            |            |            |            |            |      |
| Myotis_lucifugus            |            |            |            |            |            |            |            |      |
| Equus_caballus              |            |            |            |            |            |            |            |      |
| Tupaia_belangeri            |            |            |            |            |            |            |            |      |
| Loxodonta_africana          |            |            |            |            |            |            |            |      |
| Murinae                     |            |            |            |            |            |            |            |      |
| Canis_lupus_familiaris      |            |            |            |            |            |            |            |      |
| Sus_scrofa                  |            |            |            |            |            |            |            |      |
| Choloepus_hoffmanni         |            |            |            |            |            |            |            |      |
| Vicugna_pacos               |            |            |            |            |            |            |            |      |
| Gavialis_gangeticus         |            |            |            |            |            |            |            |      |
| Mammalia                    |            |            |            |            |            |            |            |      |
| Passeroidea                 |            |            |            |            |            |            |            |      |
| Takifugu                    |            |            |            |            |            |            |            |      |
| Pteropus_vampyrus           |            |            |            |            |            |            |            |      |
| Ornithorhynchus             |            |            |            |            |            |            |            |      |
| Oryctolagus_cuniculus       |            |            |            |            |            |            |            |      |
| Gallus_gallus               |            |            |            |            |            |            |            |      |
| Hominidae                   |            |            |            |            |            |            |            |      |
| Metatheria                  |            |            |            |            |            |            |            |      |
| Rodentia                    |            |            |            |            |            |            |            |      |
| Monodelphis                 |            |            |            |            |            |            |            |      |
| Consensus                   |            |            |            |            |            |            |            |      |
| Conservation                | 100%       |            |            |            |            |            |            |      |
|                             | 0%         |            |            |            |            |            |            |      |

|                             | 1,840      | 1,860      | 1,880          |            |              |            |               |      |
|-----------------------------|------------|------------|----------------|------------|--------------|------------|---------------|------|
| Dipodomys_ordii             |            |            |                |            |              |            |               |      |
| Laurasiatheria              |            |            |                |            |              |            |               |      |
| Eutheria                    |            |            |                |            |              |            |               |      |
| Tarsius_syricha             |            |            |                |            |              |            |               |      |
| Muridae                     |            |            |                |            |              |            |               |      |
| Gasterosteus_aculeatus      |            |            |                |            |              |            |               |      |
| Felis_silvestris            |            |            |                |            |              |            |               |      |
| Rattus                      |            |            |                |            |              |            |               |      |
| Papio_hamadryas             |            |            |                |            |              |            |               |      |
| Pan_troglodytes             |            |            |                |            |              |            |               |      |
| Ailuropoda_melanoleuca      |            |            |                |            |              |            |               |      |
| Cavia_porcellus             |            |            |                |            |              |            |               |      |
| Ictidomys_tridecemlineatus  |            |            |                |            |              |            |               |      |
| Canis                       |            |            |                |            |              |            |               |      |
| Felis_catus                 |            |            |                |            |              |            |               |      |
| Ochotona_princeps           |            |            |                |            |              |            |               |      |
| Cercopithecidae             |            |            |                |            |              |            |               |      |
| Carnivora                   |            |            |                |            |              |            |               |      |
| Mus                         |            |            |                |            |              |            |               |      |
| Mus_musculus                |            |            |                |            |              |            |               |      |
| Rattus_norvegicus           |            |            |                |            |              |            |               |      |
| Tursiops_truncatus          |            |            |                |            |              |            |               |      |
| Procapra_capensis           |            |            |                |            |              |            |               |      |
| Primates                    |            |            |                |            |              |            |               |      |
| Echinops_telfairi           |            |            |                |            |              |            |               |      |
| Sorex_araneus               |            |            |                |            |              |            |               |      |
| Canidae                     |            |            |                |            |              |            |               |      |
| Otomomys_garnettii          |            |            |                |            |              |            |               |      |
| Gallus                      |            |            |                |            |              |            |               |      |
| Callithrix_jacchus          |            |            |                |            |              |            |               |      |
| Crocodylus_porosus          |            |            |                |            |              |            |               |      |
| Erinaceus_europaeus         |            |            |                |            |              |            |               |      |
| rnd-6_family-7426-LTR-ERV1  |            |            |                |            |              |            |               |      |
| Esox_lucius                 |            |            |                |            |              |            |               |      |
| Salmo_salar                 |            |            |                |            |              |            |               |      |
| Didelphidae                 |            |            |                |            |              |            |               |      |
| Latimeria_chalumnae         |            |            |                |            |              |            |               |      |
| Monodelphis_domestica       |            |            |                |            |              |            |               |      |
| Macropus_eugenii            |            |            |                |            |              |            |               |      |
| Alligator_mississippiensis  |            |            |                |            |              |            |               |      |
| Chrysemys_picta_bellii      |            |            |                |            |              |            |               |      |
| Danio_rerio                 |            |            |                |            |              |            |               |      |
| Taeniopygia                 |            |            |                |            |              |            |               |      |
| Dasyus_novemcinctus         |            |            |                |            |              |            |               |      |
| LTR_XT                      |            |            |                |            |              |            |               |      |
| Haplorrhini                 | ATGCCCCAGT | AGGCACAGGA | GATGTCAGAN     | AGTATGCNCA | GCAGGCTTTG   | CCAATAGAAA | CTGACCCAGG    | 1885 |
| Catarrhini                  | ACGTCCCAGC | CGATTACCAA | AACCCCAAG      | AATATATAAG | A - - ATTCAG | CTGCCAGGAA | CAGACCCCA     | 1495 |
| Anolis_carolinensis         |            |            |                |            |              |            |               |      |
| Murine_leukemia_virus       | ACGATGGACG | CCCCACCCAG | - - - - TTGCCT | AATGAAGTCG | ATGCCGCCTT   | TCCCTCGAA  | C - - GCCCCGA | 1452 |
| Phascolarctos_cinereus      | TTAACGGGGC | CCCTACACAA | - - - - CTCGAG | AACCTCATT  | ATGAGGCCTT   | CCCCTTAAT  | C - - GACCTCA | 1373 |
| Estrildidae                 |            |            |                |            |              |            |               |      |
| Xenopus_Silurana_tropicalis |            |            |                |            |              |            |               |      |
| L_XT                        | NACAAACAGN | AANCAGNTTA | TTNACCNCNT     | CTNAGCCAAA | TTAGGGAATT   | GCGNACAGTN | GNAGGNCA      | 1369 |
| Takifugu_rubripes           |            |            |                |            |              |            |               |      |
| Bos_taurus                  |            |            |                |            |              |            |               |      |
| Homo_sapiens                |            |            |                |            |              |            |               |      |
| Microcebus_murinus          |            |            |                |            |              |            |               |      |
| Myotis_lucifugus            |            |            |                |            |              |            |               |      |
| Equus_caballus              |            |            |                |            |              |            |               |      |
| Tupaia_belangeri            |            |            |                |            |              |            |               |      |
| Loxodonta_africana          |            |            |                |            |              |            |               |      |
| Murinae                     |            |            |                |            |              |            |               |      |
| Canis_lupus_familiaris      |            |            |                |            |              |            |               |      |
| Sus_scrofa                  |            |            |                |            |              |            |               |      |
| Choloepus_hoffmanni         |            |            |                |            |              |            |               |      |
| Vicugna_pacos               |            |            |                |            |              |            |               |      |
| Gavialis_gangeticus         |            |            |                |            |              |            |               |      |
| Mammalia                    |            |            |                |            |              |            |               |      |
| Passeroidea                 |            |            |                |            |              |            |               |      |
| Takifugu                    |            |            |                |            |              |            |               |      |
| Pteropus_vampyrus           |            |            |                |            |              |            |               |      |
| Ornithorhynchus             |            |            |                |            |              |            |               |      |
| Oryctolagus_cuniculus       |            |            |                |            |              |            |               |      |
| Gallus_gallus               |            |            |                |            |              |            |               |      |
| Hominidae                   |            |            |                |            |              |            |               |      |
| Metatheria                  |            |            |                |            |              |            |               |      |
| Rodentia                    |            |            |                |            |              |            |               |      |
| Monodelphis                 |            |            |                |            |              |            |               |      |
| Consensus                   |            |            |                |            |              |            |               |      |
| Conservation                | 100%       |            |                |            |              |            |               |      |
|                             | 0%         |            |                |            |              |            |               |      |

|                             | 1,900      | 1,920      | 1,940      | 1,960      |            |            |            |      |
|-----------------------------|------------|------------|------------|------------|------------|------------|------------|------|
| Dipodomys_ordii             | -          | -          | -          | -          | -          |            |            |      |
| Laurasiatheria              | -          | -          | -          | -          | -          |            |            |      |
| Eutheria                    | -          | -          | -          | -          | -          |            |            |      |
| Tarsius_syrichta            | -          | -          | -          | -          | -          |            |            |      |
| Muridae                     | -          | -          | -          | -          | -          |            |            |      |
| Gasterosteus_aculeatus      | -          | -          | -          | -          | -          |            |            |      |
| Felis_silvestris            | -          | -          | -          | -          | -          |            |            |      |
| Rattus                      | -          | -          | -          | -          | -          |            |            |      |
| Papio_hamadryas             | -          | -          | -          | -          | -          |            |            |      |
| Pan_troglodytes             | -          | -          | -          | -          | -          |            |            |      |
| Ailuropoda_melanoleuca      | -          | -          | -          | -          | -          |            |            |      |
| Cavia_porcellus             | -          | -          | -          | -          | -          |            |            |      |
| Ictidomys_tridecemlineatus  | -          | -          | -          | -          | -          |            |            |      |
| Canis                       | -          | -          | -          | -          | -          |            |            |      |
| Felis_catus                 | -          | -          | -          | -          | -          |            |            |      |
| Ochotona_princeps           | -          | -          | -          | -          | -          |            |            |      |
| Cercopithecidae             | -          | -          | -          | -          | -          |            |            |      |
| Carnivora                   | -          | -          | -          | -          | -          |            |            |      |
| Mus                         | -          | -          | -          | -          | -          |            |            |      |
| Mus_musculus                | -          | -          | -          | -          | -          |            |            |      |
| Rattus_norvegicus           | -          | -          | -          | -          | -          |            |            |      |
| Tursiops_truncatus          | -          | -          | -          | -          | -          |            |            |      |
| Procapra_capensis           | -          | -          | -          | -          | -          |            |            |      |
| Primates                    | -          | -          | -          | -          | -          |            |            |      |
| Echinops_telfairi           | -          | -          | -          | -          | -          |            |            |      |
| Sorex_araneus               | -          | -          | -          | -          | -          |            |            |      |
| Canidae                     | -          | -          | -          | -          | -          |            |            |      |
| Otomomys_garnettii          | -          | -          | -          | -          | -          |            |            |      |
| Gallus                      | -          | -          | -          | -          | -          |            |            |      |
| Callithrix_jacchus          | -          | -          | -          | -          | -          |            |            |      |
| Crocodylus_porosus          | -          | -          | -          | -          | -          |            |            |      |
| Erinaceus_europaeus         | -          | -          | -          | -          | -          |            |            |      |
| rnd-6_family-7426-LTR-ERV1  | -          | -          | -          | -          | -          |            |            |      |
| Esox_lucius                 | -          | -          | -          | -          | -          |            |            |      |
| Salmo_salar                 | -          | -          | -          | -          | -          |            |            |      |
| Didelphidae                 | -          | -          | -          | -          | -          |            |            |      |
| Latimeria_chalumnae         | -          | -          | -          | -          | -          |            |            |      |
| Monodelphis_domestica       | -          | -          | -          | -          | -          |            |            |      |
| Macropus_eugenii            | -          | -          | -          | -          | -          |            |            |      |
| Alligator_mississippiensis  | -          | -          | -          | -          | -          |            |            |      |
| Chrysemys_picta_bellii      | -          | -          | -          | -          | -          |            |            |      |
| Danio_rerio                 | -          | -          | -          | -          | -          |            |            |      |
| Taeniopygia                 | -          | -          | -          | -          | -          |            |            |      |
| Dasyus_novemcinctus         | -          | -          | -          | -          | -          |            |            |      |
| LTR_XT                      | -          | -          | -          | -          | -          |            |            |      |
| Haplorrhini                 | CTGGGACCCA | AATCAGGCC  | AAGGGCTGCT | GAACCTGCTG | AGATACCGAG | AGGCTCTGAT | ACAAGGAATA | 1955 |
| Catarrhini                  | GTGGGACCCG | AACGAGGGAC | CAGACATGGA | GAGGCTAAGA | CGGTACCGTG | AGGCATTAAT | AGAAGGTCTA | 1565 |
| Anolis_carolinensis         | -          | -          | -          | -          | -          | -          | -          | -    |
| Murine_leukemia_virus       | TTGGGATTAC | ACCACCNCNG | AAGGTAGGAA | CCACCTAGTC | CTCTATCGCC | AGTTGCTCTT | AGCGGGTCTC | 1522 |
| Phascolarctos_cinereus      | GTGGGATCAC | AACACGGCTG | AAGGTAGGAA | GCGTCTCCTG | GTCTACCGCC | GGACTCTAGT | GGCGGGTCTC | 1443 |
| Estrildidae                 | -          | -          | -          | -          | -          | -          | -          | -    |
| Xenopus_Silurana_tropicalis | -          | -          | -          | -          | -          | -          | -          | -    |
| LTR_XT                      | GANCCGGAGN | TATAANCTCA | GANATNCCTT | GNAAACNTAG | CAAANNNCNA | NTNATTNGAA | NCGCCANTAC | 1439 |
| Takifugu_rubripes           | -          | -          | -          | -          | -          | -          | -          | -    |
| Bos_taurus                  | -          | -          | -          | -          | -          | -          | -          | -    |
| Homo_sapiens                | -          | -          | -          | -          | -          | -          | -          | -    |
| Microcebus_murinus          | -          | -          | -          | -          | -          | -          | -          | -    |
| Myotis_lucifugus            | -          | -          | -          | -          | -          | -          | -          | -    |
| Equus_caballus              | -          | -          | -          | -          | -          | -          | -          | -    |
| Tupaia_belangeri            | -          | -          | -          | -          | -          | -          | -          | -    |
| Loxodonta_africana          | -          | -          | -          | -          | -          | -          | -          | -    |
| Murinae                     | -          | -          | -          | -          | -          | -          | -          | -    |
| Canis_lupus_familiaris      | -          | -          | -          | -          | -          | -          | -          | -    |
| Sus_scrofa                  | -          | -          | -          | -          | -          | -          | -          | -    |
| Choloepus_hoffmanni         | -          | -          | -          | -          | -          | -          | -          | -    |
| Vicugna_pacos               | -          | -          | -          | -          | -          | -          | -          | -    |
| Gavialis_gangeticus         | -          | -          | -          | -          | -          | -          | -          | -    |
| Mammalia                    | -          | -          | -          | -          | -          | -          | -          | -    |
| Passeroidea                 | -          | -          | -          | -          | -          | -          | -          | -    |
| Takifugu                    | -          | -          | -          | -          | -          | -          | -          | -    |
| Pteropus_vampyrus           | -          | -          | -          | -          | -          | -          | -          | -    |
| Ornithorhynchus             | -          | -          | -          | -          | -          | -          | -          | -    |
| Oryctolagus_cuniculus       | -          | -          | -          | -          | -          | -          | -          | -    |
| Gallus_gallus               | -          | -          | -          | -          | -          | -          | -          | -    |
| Hominidae                   | -          | -          | -          | -          | -          | -          | -          | -    |
| Metatheria                  | -          | -          | -          | -          | -          | -          | -          | -    |
| Rodentia                    | -          | -          | -          | -          | -          | -          | -          | -    |
| Monodelphis                 | -          | -          | -          | -          | -          | -          | -          | -    |
| Consensus                   | -          | -          | -          | -          | -          | -          | -          | -    |
| Conservation                | 100%       |            |            |            |            |            |            | 0%   |



|                             | 1,980       | 2,000       | 2,020      |            |             |            |            |      |
|-----------------------------|-------------|-------------|------------|------------|-------------|------------|------------|------|
| Dipodomys_ordii             |             |             |            |            |             |            |            |      |
| Laurasiatheria              |             |             |            |            |             |            |            |      |
| Eutheria                    |             |             |            |            |             |            |            |      |
| Tarsius_syrichta            |             |             |            |            |             |            |            |      |
| Muridae                     |             |             |            |            |             |            |            |      |
| Gasterosteus_aculeatus      |             |             |            |            |             |            |            |      |
| Felis_silvestris            |             |             |            |            |             |            |            |      |
| Rattus                      |             |             |            |            |             |            |            |      |
| Papio_hamadryas             |             |             |            |            |             |            |            |      |
| Pan_troglodytes             |             |             |            |            |             |            |            |      |
| Ailuropoda_melanoleuca      |             |             |            |            |             |            |            |      |
| Cavia_porcellus             |             |             |            |            |             |            |            |      |
| Ictidomys_tridecemlineatus  |             |             |            |            |             |            |            |      |
| Canis                       |             |             |            |            |             |            |            |      |
| Felis_catus                 |             |             |            |            |             |            |            |      |
| Ochotona_princeps           |             |             |            |            |             |            |            |      |
| Cercopithecidae             |             |             |            |            |             |            |            |      |
| Carnivora                   |             |             |            |            |             |            |            |      |
| Mus                         |             |             |            |            |             |            |            |      |
| Mus_musculus                |             |             |            |            |             |            |            |      |
| Rattus_norvegicus           |             |             |            |            |             |            |            |      |
| Tursiops_truncatus          |             |             |            |            |             |            |            |      |
| Procapra_capensis           |             |             |            |            |             |            |            |      |
| Primates                    |             |             |            |            |             |            |            |      |
| Echinops_telfairi           |             |             |            |            |             |            |            |      |
| Sorex_araneus               |             |             |            |            |             |            |            |      |
| Canidae                     |             |             |            |            |             |            |            |      |
| Otomomys_garnettii          |             |             |            |            |             |            |            |      |
| Gallus                      |             |             |            |            |             |            |            |      |
| Callithrix_jacchus          |             |             |            |            |             |            |            |      |
| Crocodylus_porosus          |             |             |            |            |             |            |            |      |
| Erinaceus_europaeus         |             |             |            |            |             |            |            |      |
| rnd-6_family-7426-LTR-ERV1  |             |             |            |            |             |            |            |      |
| Esox_lucius                 |             |             |            |            |             |            |            |      |
| Salmo_salar                 |             |             |            |            |             |            |            |      |
| Didelphidae                 |             |             |            |            |             |            |            |      |
| Latimeria_chalumnae         |             |             |            |            |             |            |            |      |
| Monodelphis_domestica       |             |             |            |            |             |            |            |      |
| Macropus_eugenii            |             |             |            |            |             |            |            |      |
| Alligator_mississippiensis  |             |             |            |            |             |            |            |      |
| Chrysemys_picta_bellii      |             |             |            |            |             |            |            |      |
| Danio_rerio                 |             |             |            |            |             |            |            |      |
| Taeniopygia                 |             |             |            |            |             |            |            |      |
| Dasyus_novemcinctus         |             |             |            |            |             |            |            |      |
| LTR_XT                      |             |             |            |            |             |            |            |      |
| Haplorrhini                 | AAGGCTGGAG  | GGAAAAAGGC  | AACAAACACT | GGAAAGGTTT | CAGAGGTCCA  | TCAGAAACCA | GATGAAAGCC | 2025 |
| Catarrhini                  | AAGAAAGGGG  | CTCAAAAAGGC | TACAAATGTA | AATAAGGTCT | CTGAGGTCTAT | CCAAGGAAAA | GAGGAGAGTC | 1635 |
| Anolis_carolinensis         |             |             |            |            |             |            |            |      |
| Murine_leukemia_virus       | CAAAACGGCG  | GCAGAAGCCC  | CACCAATTTG | GCCAAGGTAA | AAGGGATAAC  | CCAGGGACCT | AATGAGTCTC | 1592 |
| Phascolarctos_cinereus      | AAAGGGGCGAG | CAAGGCGCCC  | CACCAATTTG | GCCAAGGTAA | GAGAAGTCTT  | GCAGGGACCA | ACAGAACCCC | 1513 |
| Estrildidae                 |             |             |            |            |             |            |            |      |
| Xenopus_Silurana_tropicalis |             |             |            |            |             |            |            |      |
| L_XT                        | CACACCCCAT  | NNANNCNTTN  | NTNNTNNTNC | ATCTTGACGN | TTNGNGANGN  | CCTTAANTTA | CTGCCNTTNT | 1509 |
| Takifugu_rubripes           |             |             |            |            |             |            |            |      |
| Bos_taurus                  |             |             |            |            |             |            |            |      |
| Homo_sapiens                |             |             |            |            |             |            |            |      |
| Microcebus_murinus          |             |             |            |            |             |            |            |      |
| Myotis_lucifugus            |             |             |            |            |             |            |            |      |
| Equus_caballus              |             |             |            |            |             |            |            |      |
| Tupaia_belangeri            |             |             |            |            |             |            |            |      |
| Loxodonta_africana          |             |             |            |            |             |            |            |      |
| Murinae                     |             |             |            |            |             |            |            |      |
| Canis_lupus_familiaris      |             |             |            |            |             |            |            |      |
| Sus_scrofa                  |             |             |            |            |             |            |            |      |
| Choloepus_hoffmanni         |             |             |            |            |             |            |            |      |
| Vicugna_pacos               |             |             |            |            |             |            |            |      |
| Gavialis_gangeticus         |             |             |            |            |             |            |            |      |
| Mammalia                    |             |             |            |            |             |            |            |      |
| Passeroidea                 |             |             |            |            |             |            |            |      |
| Takifugu                    |             |             |            |            |             |            |            |      |
| Pteropus_vampyrus           |             |             |            |            |             |            |            |      |
| Ornithorhynchus             |             |             |            |            |             |            |            |      |
| Oryctolagus_cuniculus       |             |             |            |            |             |            |            |      |
| Gallus_gallus               |             |             |            |            |             |            |            |      |
| Hominidae                   |             |             |            |            |             |            |            |      |
| Metatheria                  |             |             |            |            |             |            |            |      |
| Rodentia                    |             |             |            |            |             |            |            |      |
| Monodelphis                 |             |             |            |            |             |            |            |      |
| Consensus                   |             |             |            |            |             |            |            |      |
| Conservation                | 100%        |             |            |            |             |            |            |      |
|                             | 0%          |             |            |            |             |            |            |      |

|                             | 2,040      | 2,060                                                       | 2,080      | 2,100      |            |            |            |      |
|-----------------------------|------------|-------------------------------------------------------------|------------|------------|------------|------------|------------|------|
| Dipodomys_ordii             | -          | -                                                           | -          | -          | -          |            |            |      |
| Laurasiatheria              | -          | -                                                           | -          | -          | -          |            |            |      |
| Eutheria                    | -          | -                                                           | -          | -          | -          |            |            |      |
| Tarsius_syrichta            | -          | -                                                           | -          | -          | -          |            |            |      |
| Muridae                     | -          | -                                                           | -          | -          | -          |            |            |      |
| Gasterosteus_aculeatus      | -          | -                                                           | -          | -          | -          |            |            |      |
| Felis_silvestris            | -          | -                                                           | -          | -          | -          |            |            |      |
| Rattus                      | -          | -                                                           | -          | -          | -          |            |            |      |
| Papio_hamadryas             | -          | -                                                           | -          | -          | -          |            |            |      |
| Pan_troglodytes             | -          | -                                                           | -          | -          | -          |            |            |      |
| Ailuropoda_melanoleuca      | -          | -                                                           | -          | -          | -          |            |            |      |
| Cavia_porcellus             | -          | -                                                           | -          | -          | -          |            |            |      |
| Ictidomys_tridecemlineatus  | -          | -                                                           | -          | -          | -          |            |            |      |
| Canis                       | -          | -                                                           | -          | -          | -          |            |            |      |
| Felis_catus                 | -          | -                                                           | -          | -          | -          |            |            |      |
| Ochotona_princeps           | -          | -                                                           | -          | -          | -          |            |            |      |
| Cercopithecidae             | -          | -                                                           | -          | -          | -          |            |            |      |
| Carnivora                   | -          | -                                                           | -          | -          | -          |            |            |      |
| Mus                         | -          | -                                                           | -          | -          | -          |            |            |      |
| Mus_musculus                | -          | -                                                           | -          | -          | -          |            |            |      |
| Rattus_norvegicus           | -          | -                                                           | -          | -          | -          |            |            |      |
| Tursiops_truncatus          | -          | -                                                           | -          | -          | -          |            |            |      |
| Procapra_capensis           | -          | -                                                           | -          | -          | -          |            |            |      |
| Primates                    | -          | -                                                           | -          | -          | -          |            |            |      |
| Echinops_telfairi           | -          | -                                                           | -          | -          | -          |            |            |      |
| Sorex_araneus               | -          | -                                                           | -          | -          | -          |            |            |      |
| Canidae                     | -          | -                                                           | -          | -          | -          |            |            |      |
| Otomomys_garnettii          | -          | -                                                           | -          | -          | -          |            |            |      |
| Gallus                      | -          | -                                                           | -          | -          | -          |            |            |      |
| Callithrix_jacchus          | -          | -                                                           | -          | -          | -          |            |            |      |
| Crocodylus_porosus          | -          | -                                                           | -          | -          | -          |            |            |      |
| Erinaceus_europaeus         | -          | -                                                           | -          | -          | -          |            |            |      |
| rnd-6_family-7426-LTR-ERV1  | -          | -                                                           | -          | -          | -          |            |            |      |
| Esox_lucius                 | -          | -                                                           | -          | -          | -          |            |            |      |
| Salmo_salar                 | -          | -                                                           | -          | -          | -          |            |            |      |
| Didelphidae                 | -          | -                                                           | -          | -          | -          |            |            |      |
| Latimeria_chalumnae         | -          | -                                                           | -          | -          | -          |            |            |      |
| Monodelphis_domestica       | -          | -                                                           | -          | -          | -          |            |            |      |
| Macropus_eugenii            | -          | -                                                           | -          | -          | -          |            |            |      |
| Alligator_mississippiensis  | -          | -                                                           | -          | -          | -          |            |            |      |
| Chrysemys_picta_bellii      | -          | -                                                           | -          | -          | -          |            |            |      |
| Danio_rerio                 | -          | -                                                           | -          | -          | -          |            |            |      |
| Taeniopygia                 | -          | -                                                           | -          | -          | -          |            |            |      |
| Dasyus_novemcinctus         | -          | -                                                           | -          | -          | -          |            |            |      |
| LTR_XT                      | -          | -                                                           | -          | -          | -          |            |            |      |
| Haplorrhini                 | CCAGTGAGTT | CTATGAGAGG                                                  | CTTTGTGAGG | CTTACCGGCT | CTACACACCT | TTTGACCCAG | AAGCGGCAGG | 2095 |
| Catarrhini                  | CAGCGCAATT | CTATGAAAGA                                                  | CTGTGTGAGG | CTTACCGTAT | GTACACTCCT | TTTGATCCAG | ATAGCCCTGA | 1705 |
| Anolis_carolinensis         | -          | -                                                           | -          | -          | -          | -          | -          | -    |
| Murine_leukemia_virus       | CCTCGGCCTT | TTTAGAGAGA                                                  | CTCAAGGAGG | CCTATCGCAG | GTACACTCCT | TATGACCCTG | AGGACCCAGG | 1662 |
| Phascolarctos_cinereus      | CGTCCGTTT  | TCTAGAACGT                                                  | CTAATGGAGG | CTTATAGGAG | ATATACCCCA | TTTGATCCCT | CTTCTGAGGG | 1583 |
| Estrildidae                 | -          | -                                                           | -          | -          | -          | -          | -          | -    |
| Xenopus_Silurana_tropicalis | -          | -                                                           | -          | -          | -          | -          | -          | -    |
| LTR_XT                      | TGNAGGAGCN | CANNANGAAT                                                  | TGTTAATTGA | NACNNGGGCC | NAATTTATGG | TTATTNNTAA | AAAANNTACT | 1579 |
| Takifugu_rubripes           | -          | -                                                           | -          | -          | -          | -          | -          | -    |
| Bos_taurus                  | -          | -                                                           | -          | -          | -          | -          | -          | -    |
| Homo_sapiens                | -          | -                                                           | -          | -          | -          | -          | -          | -    |
| Microcebus_murinus          | -          | -                                                           | -          | -          | -          | -          | -          | -    |
| Myotis_lucifugus            | -          | -                                                           | -          | -          | -          | -          | -          | -    |
| Equus_caballus              | -          | -                                                           | -          | -          | -          | -          | -          | -    |
| Tupaia_belangeri            | -          | -                                                           | -          | -          | -          | -          | -          | -    |
| Loxodonta_africana          | -          | -                                                           | -          | -          | -          | -          | -          | -    |
| Murinae                     | -          | -                                                           | -          | -          | -          | -          | -          | -    |
| Canis_lupus_familiaris      | -          | -                                                           | -          | -          | -          | -          | -          | -    |
| Sus_scrofa                  | -          | -                                                           | -          | -          | -          | -          | -          | -    |
| Choloepus_hoffmanni         | -          | -                                                           | -          | -          | -          | -          | -          | -    |
| Vicugna_pacos               | -          | -                                                           | -          | -          | -          | -          | -          | -    |
| Gavialis_gangeticus         | -          | -                                                           | -          | -          | -          | -          | -          | -    |
| Mammalia                    | -          | -                                                           | -          | -          | -          | -          | -          | -    |
| Passeroidea                 | -          | -                                                           | -          | -          | -          | -          | -          | -    |
| Takifugu                    | -          | -                                                           | -          | -          | -          | -          | -          | -    |
| Pteropus_vampyrus           | -          | -                                                           | -          | -          | -          | -          | -          | -    |
| Ornithorhynchus             | -          | -                                                           | -          | -          | -          | -          | -          | -    |
| Oryctolagus_cuniculus       | -          | -                                                           | -          | -          | -          | -          | -          | -    |
| Gallus_gallus               | -          | -                                                           | -          | -          | -          | -          | -          | -    |
| Hominidae                   | -          | -                                                           | -          | -          | -          | -          | -          | -    |
| Metatheria                  | -          | -                                                           | -          | -          | -          | -          | -          | -    |
| Rodentia                    | -          | -                                                           | -          | -          | -          | -          | -          | -    |
| Monodelphis                 | -          | -                                                           | -          | -          | -          | -          | -          | -    |
| Consensus                   | -          | -                                                           | -          | -          | -          | -          | -          | -    |
| Conservation                | 100%       | [Bar chart showing conservation levels across the sequence] |            |            |            |            |            | 0%   |

|                             | 2,120       | 2,140      | 2,160       |             |             |             |             |      |
|-----------------------------|-------------|------------|-------------|-------------|-------------|-------------|-------------|------|
| Dipodomys_ordii             |             |            |             |             |             |             |             |      |
| Laurasiatheria              |             |            |             |             |             |             |             |      |
| Eutheria                    |             |            |             |             |             |             |             |      |
| Tarsius_syricha             |             |            |             |             |             |             |             |      |
| Muridae                     |             |            |             |             |             |             |             |      |
| Gasterosteus_aculeatus      |             |            |             |             |             |             |             |      |
| Felis_silvestris            |             |            |             |             |             |             |             |      |
| Rattus                      |             |            |             |             |             |             |             |      |
| Papio_hamadryas             |             |            |             |             |             |             |             |      |
| Pan_troglodytes             |             |            |             |             |             |             |             |      |
| Ailuropoda_melanoleuca      |             |            |             |             |             |             |             |      |
| Cavia_porcellus             |             |            |             |             |             |             |             |      |
| Ictidomys_tridecemlineatus  |             |            |             |             |             |             |             |      |
| Canis                       |             |            |             |             |             |             |             |      |
| Felis_catus                 |             |            |             |             |             |             |             |      |
| Ochotona_princeps           |             |            |             |             |             |             |             |      |
| Cercopithecidae             |             |            |             |             |             |             |             |      |
| Carnivora                   |             |            |             |             |             |             |             |      |
| Mus                         |             |            |             |             |             |             |             |      |
| Mus_musculus                |             |            |             |             |             |             |             |      |
| Rattus_norvegicus           |             |            |             |             |             |             |             |      |
| Tursiops_truncatus          |             |            |             |             |             |             |             |      |
| Procapra_capensis           |             |            |             |             |             |             |             |      |
| Primates                    |             |            |             |             |             |             |             |      |
| Echinops_telfairi           |             |            |             |             |             |             |             |      |
| Sorex_araneus               |             |            |             |             |             |             |             |      |
| Canidae                     |             |            |             |             |             |             |             |      |
| Otomur_garnettii            |             |            |             |             |             |             |             |      |
| Gallus                      |             |            |             |             |             |             |             |      |
| Callithrix_jacchus          |             |            |             |             |             |             |             |      |
| Crocodylus_porosus          |             |            |             |             |             |             |             |      |
| Erinaceus_europaeus         |             |            |             |             |             |             |             |      |
| rnd-6_family-7426-LTR-ERV1  |             |            |             |             |             |             |             |      |
| Esox_lucius                 |             |            |             |             |             |             |             |      |
| Salmo_salar                 |             |            |             |             |             |             |             |      |
| Didelphidae                 |             |            |             |             |             |             |             |      |
| Latimeria_chalumnae         |             |            |             |             |             |             |             |      |
| Monodelphis_domestica       |             |            |             |             |             |             |             |      |
| Macropus_eugenii            |             |            |             |             |             |             |             |      |
| Alligator_mississippiensis  |             |            |             |             |             |             |             |      |
| Chrysemys_picta_bellii      |             |            |             |             |             |             |             |      |
| Danio_rerio                 |             |            |             |             |             |             |             |      |
| Taeniopygia                 |             |            |             |             |             |             |             |      |
| Dasyus_novemcinctus         |             |            |             |             |             |             |             |      |
| LTR_XT                      |             |            |             |             |             |             |             |      |
| Haplorrhini                 | GAATCAGTGC  | ATGGTTAATG | CGGCATTTCGT | GAGTCAG- GC | ACAAAAATGAC | ATTAAGCGAA  | AGTTGCAGAA  | 2164 |
| Catarrhini                  | AAATCAGCGC  | ATGATTAACA | TGGCCTTAGT  | TAGTCAAAGC  | GCGGAA- GAT | ATCAGGAGAA  | AATTGCAGAA  | 1774 |
| Anolis_carolinensis         |             |            |             |             |             |             |             |      |
| Murine_leukemia_virus       | GCAAGAAACC  | AATGTGTCTA | TGTCGTTTCT  | CTGGCAGTCT  | GCCCCG- GAT | ATCGGGCGAA  | AGTTAGAGCG  | 1731 |
| Phascolarctos_cinereus      | ACAAAAGGCG  | GCGGTGGCCA | TGTCCTTTAT  | CGGGCAGTCT  | GCCCCG- GAT | ATTA AAAAGA | AATTACAAAAG | 1652 |
| Estrildidae                 |             |            |             |             |             |             |             |      |
| Xenopus_Silurana_tropicalis |             |            |             |             |             |             |             |      |
| L_XT                        | ATNNTTAGCCG | TNCCAGNAGN | NCCNGCTNGT  | NCTNTGTAG   | GNTTCAANAG  | AGNNA AANAC | NNTGCCANAA  | 1649 |
| Takifugu_rubripes           |             |            |             |             |             |             |             |      |
| Bos_taurus                  |             |            |             |             |             |             |             |      |
| Homo_sapiens                |             |            |             |             |             |             |             |      |
| Microcebus_murinus          |             |            |             |             |             |             |             |      |
| Myotis_lucifugus            |             |            |             |             |             |             |             |      |
| Equus_caballus              |             |            |             |             |             |             |             |      |
| Tupaia_belangeri            |             |            |             |             |             |             |             |      |
| Loxodonta_africana          |             |            |             |             |             |             |             |      |
| Murinae                     |             |            |             |             |             |             |             |      |
| Canis_lupus_familiaris      |             |            |             |             |             |             |             |      |
| Sus_scrofa                  |             |            |             |             |             |             |             |      |
| Choloepus_hoffmanni         |             |            |             |             |             |             |             |      |
| Vicugna_pacos               |             |            |             |             |             |             |             |      |
| Gavialis_gangeticus         |             |            |             |             |             |             |             |      |
| Mammalia                    |             |            |             |             |             |             |             |      |
| Passeroidea                 |             |            |             |             |             |             |             |      |
| Takifugu                    |             |            |             |             |             |             |             |      |
| Pteropus_vampyrus           |             |            |             |             |             |             |             |      |
| Ornithorhynchus             |             |            |             |             |             |             |             |      |
| Oryctolagus_cuniculus       |             |            |             |             |             |             |             |      |
| Gallus_gallus               |             |            |             |             |             |             |             |      |
| Hominidae                   |             |            |             |             |             |             |             |      |
| Metatheria                  |             |            |             |             |             |             |             |      |
| Rodentia                    |             |            |             |             |             |             |             |      |
| Monodelphis                 |             |            |             |             |             |             |             |      |
| Consensus                   |             |            |             |             |             |             |             |      |
| Conservation                | 100%        |            |             |             |             |             |             |      |
|                             | 0%          |            |             |             |             |             |             |      |

|                             | 2,180      | 2,200      | 2,220      | 2,240      |            |            |            |      |
|-----------------------------|------------|------------|------------|------------|------------|------------|------------|------|
| Dipodomys_ordii             | -          | -          | -          | -          | -          |            |            |      |
| Laurasiatheria              | -          | -          | -          | -          | -          |            |            |      |
| Eutheria                    | -          | -          | -          | -          | -          |            |            |      |
| Tarsius_syrichta            | -          | -          | -          | -          | -          |            |            |      |
| Muridae                     | -          | -          | -          | -          | -          |            |            |      |
| Gasterosteus_aculeatus      | -          | -          | -          | -          | -          |            |            |      |
| Felis_silvestris            | -          | -          | -          | -          | -          |            |            |      |
| Rattus                      | -          | -          | -          | -          | -          |            |            |      |
| Papio_hamadryas             | -          | -          | -          | -          | -          |            |            |      |
| Pan_troglodytes             | -          | -          | -          | -          | -          |            |            |      |
| Ailuropoda_melanoleuca      | -          | -          | -          | -          | -          |            |            |      |
| Cavia_porcellus             | -          | -          | -          | -          | -          |            |            |      |
| Ictidomys_tridecemlineatus  | -          | -          | -          | -          | -          |            |            |      |
| Canis                       | -          | -          | -          | -          | -          |            |            |      |
| Felis_catus                 | -          | -          | -          | -          | -          |            |            |      |
| Ochotona_princeps           | -          | -          | -          | -          | -          |            |            |      |
| Cercopithecidae             | -          | -          | -          | -          | -          |            |            |      |
| Carnivora                   | -          | -          | -          | -          | -          |            |            |      |
| Mus                         | -          | -          | -          | -          | -          |            |            |      |
| Mus_musculus                | -          | -          | -          | -          | -          |            |            |      |
| Rattus_norvegicus           | -          | -          | -          | -          | -          |            |            |      |
| Tursiops_truncatus          | -          | -          | -          | -          | -          |            |            |      |
| Procapra_capensis           | -          | -          | -          | -          | -          |            |            |      |
| Primates                    | -          | -          | -          | -          | -          |            |            |      |
| Echinops_telfairi           | -          | -          | -          | -          | -          |            |            |      |
| Sorex_araneus               | -          | -          | -          | -          | -          |            |            |      |
| Canidae                     | -          | -          | -          | -          | -          |            |            |      |
| Otomomys_garnettii          | -          | -          | -          | -          | -          |            |            |      |
| Gallus                      | -          | -          | -          | -          | -          |            |            |      |
| Callithrix_jacchus          | -          | -          | -          | -          | -          |            |            |      |
| Crocodylus_porosus          | -          | -          | -          | -          | -          |            |            |      |
| Erinaceus_europaeus         | -          | -          | -          | -          | -          |            |            |      |
| rnd-6_family-7426-LTR-ERV1  | -          | -          | -          | -          | -          |            |            |      |
| Esox_lucius                 | -          | -          | -          | -          | -          |            |            |      |
| Salmo_salar                 | -          | -          | -          | -          | -          |            |            |      |
| Didelphidae                 | -          | -          | -          | -          | -          |            |            |      |
| Latimeria_chalumnae         | -          | -          | -          | -          | -          |            |            |      |
| Monodelphis_domestica       | -          | -          | -          | -          | -          |            |            |      |
| Macropus_eugenii            | -          | -          | -          | -          | -          |            |            |      |
| Alligator_mississippiensis  | -          | -          | -          | -          | -          |            |            |      |
| Chrysemys_picta_bellii      | -          | -          | -          | -          | -          |            |            |      |
| Danio_rerio                 | -          | -          | -          | -          | -          |            |            |      |
| Taeniopygia                 | -          | -          | -          | -          | -          |            |            |      |
| Dasyus_novemcinctus         | -          | -          | -          | -          | -          |            |            |      |
| LTR_XT                      | -          | -          | -          | -          | -          |            |            |      |
| Haplorrhini                 | GCTGGAGGGG | TTTGAAGGTA | TGAACATTTT | CCAGCTTATC | CAGGTGGCAA | CCAAAGTGTT | TGTAATCGA  | 2234 |
| Catarrhini                  | ACAGGCTGGG | TTTGCGGGTA | TGAATACCTC | ACGGTTACTG | GAAATAGCCA | ATCAAGTGTT | TGTGAATAGA | 1844 |
| Anolis_carolinensis         | -          | -          | -          | -          | -          | -          | -          | -    |
| Murine_leukemia_virus       | GTTAGAAGAT | TTAAAGAGCA | AGACCTTAGG | AGACTTAGTG | AGGGAAGCTG | AAAAGATCTT | TAATAAGCGA | 1801 |
| Phascolarctos_cinereus      | GCTGGAAGGA | CTCCAGGACC | ATTCCTTGCA | GGATCTCATA | AAGGAGGCAG | AGAAGGTATA | TCATAAGAGA | 1722 |
| Estrildidae                 | -          | -          | -          | -          | -          | -          | -          | -    |
| Xenopus_Silurana_tropicalis | -          | -          | -          | -          | -          | -          | -          | -    |
| LTR_XT                      | CACTGATNTC | NAACATTNCA | TGANTNATNC | CNGAGTTTCN | AANNACGGAG | NNNGGTTNCT | GANATNGTNA | 1719 |
| Takifugu_rubripes           | -          | -          | -          | -          | -          | -          | -          | -    |
| Bos_taurus                  | -          | -          | -          | -          | -          | -          | -          | -    |
| Homo_sapiens                | -          | -          | -          | -          | -          | -          | -          | -    |
| Microcebus_murinus          | -          | -          | -          | -          | -          | -          | -          | -    |
| Myotis_lucifugus            | -          | -          | -          | -          | -          | -          | -          | -    |
| Equus_caballus              | -          | -          | -          | -          | -          | -          | -          | -    |
| Tupaia_belangeri            | -          | -          | -          | -          | -          | -          | -          | -    |
| Loxodonta_africana          | -          | -          | -          | -          | -          | -          | -          | -    |
| Murinae                     | -          | -          | -          | -          | -          | -          | -          | -    |
| Canis_lupus_familiaris      | -          | -          | -          | -          | -          | -          | -          | -    |
| Sus_scrofa                  | -          | -          | -          | -          | -          | -          | -          | -    |
| Choloepus_hoffmanni         | -          | -          | -          | -          | -          | -          | -          | -    |
| Vicugna_pacos               | -          | -          | -          | -          | -          | -          | -          | -    |
| Gavialis_gangeticus         | -          | -          | -          | -          | -          | -          | -          | -    |
| Mammalia                    | -          | -          | -          | -          | -          | -          | -          | -    |
| Passeroidea                 | -          | -          | -          | -          | -          | -          | -          | -    |
| Takifugu                    | -          | -          | -          | -          | -          | -          | -          | -    |
| Pteropus_vampyrus           | -          | -          | -          | -          | -          | -          | -          | -    |
| Ornithorhynchus             | -          | -          | -          | -          | -          | -          | -          | -    |
| Oryctolagus_cuniculus       | -          | -          | -          | -          | -          | -          | -          | -    |
| Gallus_gallus               | -          | -          | -          | -          | -          | -          | -          | -    |
| Hominidae                   | GCTGGAAGGA | CTCCAGGACC | ATTCCTTGCA | GGATCTCATA | AAGGAGGCAG | AGAAGGTATA | TCATAAGAGA | -    |
| Metatheria                  | -          | -          | -          | -          | -          | -          | -          | -    |
| Rodentia                    | -          | -          | -          | -          | -          | -          | -          | -    |
| Monodelphis                 | -          | -          | -          | -          | -          | -          | -          | -    |
| Consensus                   | -          | -          | -          | -          | -          | -          | -          | -    |
| Conservation                | 100%       | 0%         | -          | -          | -          | -          | -          | -    |

|                             | 2,260        | 2,280       | 2,300      |               |              |            |                |      |
|-----------------------------|--------------|-------------|------------|---------------|--------------|------------|----------------|------|
| Dipodomys_ordii             |              |             |            |               |              |            |                |      |
| Laurasiatheria              |              |             |            |               |              |            |                |      |
| Eutheria                    |              |             |            |               |              |            |                |      |
| Tarsius_syrichta            |              |             |            |               |              |            |                |      |
| Muridae                     |              |             |            |               |              |            |                |      |
| Gasterosteus_aculeatus      |              |             |            |               |              |            |                |      |
| Felis_silvestris            |              |             |            |               |              |            |                |      |
| Rattus                      |              |             |            |               |              |            |                |      |
| Papio_hamadryas             |              |             |            |               |              |            |                |      |
| Pan_troglodytes             |              |             |            |               |              |            |                |      |
| Ailuropoda_melanoleuca      |              |             |            |               |              |            |                |      |
| Cavia_porcellus             |              |             |            |               |              |            |                |      |
| Ictidomys_tridecemlineatus  |              |             |            |               |              |            |                |      |
| Canis                       |              |             |            |               |              |            |                |      |
| Felis_catus                 |              |             |            |               |              |            |                |      |
| Ochotona_princeps           |              |             |            |               |              |            |                |      |
| Cercopithecidae             |              |             |            |               |              |            |                |      |
| Carnivora                   |              |             |            |               |              |            |                |      |
| Mus                         |              |             |            |               |              |            |                |      |
| Mus_musculus                |              |             |            |               |              |            |                |      |
| Rattus_norvegicus           |              |             |            |               |              |            |                |      |
| Tursiops_truncatus          |              |             |            |               |              |            |                |      |
| Procapra_capensis           |              |             |            |               |              |            |                |      |
| Primates                    |              |             |            |               |              |            |                |      |
| Echinops_telfairi           |              |             |            |               |              |            |                |      |
| Sorex_araneus               |              |             |            |               |              |            |                |      |
| Canidae                     |              |             |            |               |              |            |                |      |
| Otomur_garnettii            |              |             |            |               |              |            |                |      |
| Gallus                      |              |             |            |               |              |            |                |      |
| Callithrix_jacchus          |              |             |            |               |              |            |                |      |
| Crocodylus_porosus          |              |             |            |               |              |            |                |      |
| Erinaceus_europaeus         |              |             |            |               |              |            |                |      |
| rnd-6_family-7426-LTR-ERV1  |              |             |            |               |              |            |                |      |
| Esox_lucius                 |              |             |            |               |              |            |                |      |
| Salmo_salar                 |              |             |            |               |              |            |                |      |
| Didelphidae                 |              |             |            |               |              |            |                |      |
| Latimeria_chalumnae         |              |             |            |               |              |            |                |      |
| Monodelphis_domestica       |              |             |            |               |              |            |                |      |
| Macropus_eugenii            |              |             |            |               |              |            |                |      |
| Alligator_mississippiensis  |              |             |            |               |              |            |                |      |
| Chrysemys_picta_bellii      |              |             |            |               |              |            |                |      |
| Danio_rerio                 |              |             |            |               |              |            |                |      |
| Taeniopygia                 |              |             |            |               |              |            |                |      |
| Dasyus_novemcinctus         |              |             |            |               |              |            |                |      |
| LTR_XT                      |              |             |            |               |              |            |                |      |
| Haplorrhini                 | GATGAAGAAG   | CAAAGCGGGA  | GGCCAAGCGT | AGAGTGAAGG    | AAAAGGCAGA   | GTTCTTGGCC | GCAGCCCTGG     | 2304 |
| Catarrhini                  | GATGC - - AA | CAAGCCGCAG  | AGAAAGCCGT | AAGG - - AAGG | CGAACGC - -  | - - - - -  | - - - - - CAGG | 1890 |
| Anolis_carolinensis         |              |             |            |               |              |            |                |      |
| Murine_leukemia_virus       | GAAACCCCGG   | AAGAAAAGAGA | GGAACGTATC | AGGAGAGAAA    | CAGAGG - - - | - - - - -  | - - - - - A    | 1848 |
| Phascolarctos_cinereus      | GAGACAGAGG   | AAGAAAAGCA  | AGAAAGAGAG | AAAAAGGAGA    | CAGAGG - - - | - - - - -  | - - - - - A    | 1769 |
| Estrildidae                 |              |             |            |               |              |            |                |      |
| Xenopus_Silurana_tropicalis |              |             |            |               |              |            |                |      |
| L_XT                        | GGGAGCNNAC   | ACTNCTACTAG | GGACNGATTN | NNTTGAAAAAN   | NGTGGATNGA   | TAGTTGATCT | AGCANANAGG     | 1789 |
| Takifugu_rubripes           |              |             |            |               |              |            |                |      |
| Bos_taurus                  |              |             |            |               |              |            |                |      |
| Homo_sapiens                |              |             |            |               |              |            |                |      |
| Microcebus_murinus          |              |             |            |               |              |            |                |      |
| Myotis_lucifugus            |              |             |            |               |              |            |                |      |
| Equus_caballus              |              |             |            |               |              |            |                |      |
| Tupaia_belangeri            |              |             |            |               |              |            |                |      |
| Loxodonta_africana          |              |             |            |               |              |            |                |      |
| Murinae                     |              |             |            |               |              |            |                |      |
| Canis_lupus_familiaris      |              |             |            |               |              |            |                |      |
| Sus_scrofa                  |              |             |            |               |              |            |                |      |
| Choloepus_hoffmanni         |              |             |            |               |              |            |                |      |
| Vicugna_pacos               |              |             |            |               |              |            |                |      |
| Gavialis_gangeticus         |              |             |            |               |              |            |                |      |
| Mammalia                    |              |             |            |               |              |            |                |      |
| Passeroidea                 |              |             |            |               |              |            |                |      |
| Takifugu                    |              |             |            |               |              |            |                |      |
| Pteropus_vampyrus           |              |             |            |               |              |            |                |      |
| Ornithorhynchus             |              |             |            |               |              |            |                |      |
| Oryctolagus_cuniculus       |              |             |            |               |              |            |                |      |
| Gallus_gallus               |              |             |            |               |              |            |                |      |
| Hominidae                   |              |             |            |               |              |            |                |      |
| Metatheria                  |              |             |            |               |              |            |                |      |
| Rodentia                    |              |             |            |               |              |            |                |      |
| Monodelphis                 |              |             |            |               |              |            |                |      |
| Consensus                   |              |             |            |               |              |            |                |      |
| Conservation                | 100%         |             |            |               |              |            |                |      |
|                             | 0%           |             |            |               |              |            |                |      |

|                             | 2,320       | 2,340        | 2,360         | 2,380       |              |             |            |      |
|-----------------------------|-------------|--------------|---------------|-------------|--------------|-------------|------------|------|
| Dipodomys_ordii             | ----        | ----         | ----          | ----        | -            |             |            |      |
| Laurasiatheria              | ----        | ----         | ----          | ----        | -            |             |            |      |
| Eutheria                    | ----        | ----         | ----          | ----        | -            |             |            |      |
| Tarsius_syrichta            | ----        | ----         | ----          | ----        | -            |             |            |      |
| Muridae                     | ----        | ----         | ----          | ----        | -            |             |            |      |
| Gasterosteus_aculeatus      | ----        | ----         | ----          | ----        | -            |             |            |      |
| Felis_silvestris            | ----        | ----         | ----          | ----        | -            |             |            |      |
| Rattus                      | ----        | ----         | ----          | ----        | -            |             |            |      |
| Papio_hamadryas             | ----        | ----         | ----          | ----        | -            |             |            |      |
| Pan_troglodytes             | ----        | ----         | ----          | ----        | -            |             |            |      |
| Ailuropoda_melanoleuca      | ----        | ----         | ----          | ----        | -            |             |            |      |
| Cavia_porcellus             | ----        | ----         | ----          | ----        | -            |             |            |      |
| Ictidomys_tridecemlineatus  | ----        | ----         | ----          | ----        | -            |             |            |      |
| Canis                       | ----        | ----         | ----          | ----        | -            |             |            |      |
| Felis_catus                 | ----        | ----         | ----          | ----        | -            |             |            |      |
| Ochotona_princeps           | ----        | ----         | ----          | ----        | -            |             |            |      |
| Cercopithecidae             | ----        | ----         | ----          | ----        | -            |             |            |      |
| Carnivora                   | ----        | ----         | ----          | ----        | -            |             |            |      |
| Mus                         | ----        | ----         | ----          | ----        | -            |             |            |      |
| Mus_musculus                | ----        | ----         | ----          | ----        | -            |             |            |      |
| Rattus_norvegicus           | ----        | ----         | ----          | ----        | -            |             |            |      |
| Tursiops_truncatus          | ----        | ----         | ----          | ----        | -            |             |            |      |
| Procapra_capensis           | ----        | ----         | ----          | ----        | -            |             |            |      |
| Primates                    | ----        | ----         | ----          | ----        | -            |             |            |      |
| Echinops_telfairi           | ----        | ----         | ----          | ----        | -            |             |            |      |
| Sorex_araneus               | ----        | ----         | ----          | ----        | -            |             |            |      |
| Canidae                     | ----        | ----         | ----          | ----        | -            |             |            |      |
| Otolemur_garnettii          | ----        | ----         | ----          | ----        | -            |             |            |      |
| Gallus                      | ----        | ----         | ----          | ----        | -            |             |            |      |
| Callithrix_jacchus          | ----        | ----         | ----          | ----        | -            |             |            |      |
| Crocodylus_porosus          | ----        | ----         | ----          | ----        | -            |             |            |      |
| Erinaceus_europaeus         | ----        | ----         | ----          | ----        | -            |             |            |      |
| rnd-6_family-7426-LTR-ERV1  | ----        | ----         | ----          | ----        | -            |             |            |      |
| Esox_lucius                 | ----        | ----         | ----          | ----        | -            |             |            |      |
| Salmo_salar                 | ----        | ----         | ----          | ----        | -            |             |            |      |
| Didelphidae                 | ----        | ----         | ----          | ----        | -            |             |            |      |
| Latimeria_chalumnae         | ----        | ----         | ----          | ----        | -            |             |            |      |
| Monodelphis_domestica       | ----        | ----         | ----          | ----        | -            |             |            |      |
| Macropus_eugenii            | ----        | ----         | ----          | ----        | -            |             |            |      |
| Alligator_mississippiensis  | ----        | ----         | ----          | ----        | -            |             |            |      |
| Chrysemys_picta_bellii      | ----        | ----         | ----          | ----        | -            |             |            |      |
| Danio_rerio                 | ----        | ----         | ----          | ----        | -            |             |            |      |
| Taeniopygia                 | ----        | ----         | ----          | ----        | -            |             |            |      |
| Dasybus_novemcinctus        | ----        | ----         | ----          | ----        | -            |             |            |      |
| LTR_XT                      | ----        | ----         | ----          | ----        | -            |             |            |      |
| Haplorrhini                 | TTGAAAGAGA  | GGCTGGATTT   | GCAAGAGGAC    | ATGGACGTGG  | TCAT - GGATG | CGGT CACGGT | AGAGGACAAG | 2373 |
| Catarrhini                  | CTAGGCCGAAA | CGCCG - ACTT | AC - - - - -  | - TGGCCGCGG | CCATTAGGGG   | AATTCCCCCG  | AAAGGAGAGG | 1950 |
| Anolis_carolinensis         | ----        | ----         | ----          | ----        | ----         | ----        | ----       | -    |
| Murine_leukemia_virus       | AAAAGAAGAA  | CGCCG - - TA | G - - GGCAGAG | GATGAGCAGA  | GAGAGAAAAG   | AAGGGACCCG  | AGAAGACATA | 1913 |
| Phascolarctos_cinereus      | AAGAGAGAGA  | CGCCG - - TG | ACAGGCCGCA    | GGAGAAAAAC  | TTGACCAAAA   | TCTTGGCCCG  | GGTAGTAAGT | 1836 |
| Estrildidae                 | ----        | ----         | ----          | ----        | ----         | ----        | ----       | -    |
| Xenopus_Silurana_tropicalis | ----        | ----         | ----          | ----        | ----         | ----        | ----       | -    |
| LTR_XT                      | GAATATGGA   | ATNATGGCNT   | AGGTAAANAT    | CNGGTTGTTA  | TTGATGCNNC   | TGGGTTGACN  | AAAAACTTTA | 1859 |
| Takifugu_rubripes           | ----        | ----         | ----          | ----        | ----         | ----        | ----       | -    |
| Bos_taurus                  | ----        | ----         | ----          | ----        | ----         | ----        | ----       | -    |
| Homo_sapiens                | ----        | ----         | ----          | ----        | ----         | ----        | ----       | -    |
| Microcebus_murinus          | ----        | ----         | ----          | ----        | ----         | ----        | ----       | -    |
| Myotis_lucifugus            | ----        | ----         | ----          | ----        | ----         | ----        | ----       | -    |
| Equus_caballus              | ----        | ----         | ----          | ----        | ----         | ----        | ----       | -    |
| Tupaia_belangeri            | ----        | ----         | ----          | ----        | ----         | ----        | ----       | -    |
| Loxodonta_africana          | ----        | ----         | ----          | ----        | ----         | ----        | ----       | -    |
| Murinae                     | ----        | ----         | ----          | ----        | ----         | ----        | ----       | -    |
| Canis_lupus_familiaris      | ----        | ----         | ----          | ----        | ----         | ----        | ----       | -    |
| Sus_scrofa                  | ----        | ----         | ----          | ----        | ----         | ----        | ----       | -    |
| Choloepus_hoffmanni         | ----        | ----         | ----          | ----        | ----         | ----        | ----       | -    |
| Vicugna_pacos               | ----        | ----         | ----          | ----        | ----         | ----        | ----       | -    |
| Gavialis_gangeticus         | ----        | ----         | ----          | ----        | ----         | ----        | ----       | -    |
| Mammalia                    | ----        | ----         | ----          | ----        | ----         | ----        | ----       | -    |
| Passeroidea                 | ----        | ----         | ----          | ----        | ----         | ----        | ----       | -    |
| Takifugu                    | ----        | ----         | ----          | ----        | ----         | ----        | ----       | -    |
| Pteropus_vampyrus           | ----        | ----         | ----          | ----        | ----         | ----        | ----       | -    |
| Ornithorhynchus             | ----        | ----         | ----          | ----        | ----         | ----        | ----       | -    |
| Oryctolagus_cuniculus       | ----        | ----         | ----          | ----        | ----         | ----        | ----       | -    |
| Gallus_gallus               | ----        | ----         | ----          | ----        | ----         | ----        | ----       | -    |
| Hominidae                   | ----        | ----         | ----          | ----        | ----         | ----        | ----       | -    |
| Metatheria                  | ----        | ----         | ----          | ----        | ----         | ----        | ----       | -    |
| Rodentia                    | ----        | ----         | ----          | ----        | ----         | ----        | ----       | -    |
| Monodelphis                 | ----        | ----         | ----          | ----        | ----         | ----        | ----       | -    |
| Consensus                   | ----        | ----         | ----          | ----        | ----         | ----        | ----       | -    |
| Conservation                | 100%        | 0%           | 0%            | 0%          | 0%           | 0%          | 0%         | -    |

|                             | 2,400      | 2,420      | 2,440           |            |            |            |            |      |
|-----------------------------|------------|------------|-----------------|------------|------------|------------|------------|------|
| Dipodomys_ordii             |            |            |                 |            |            |            |            |      |
| Laurasiatheria              |            |            |                 |            |            |            |            |      |
| Eutheria                    |            |            |                 |            |            |            |            |      |
| Tarsius_syrichta            |            |            |                 |            |            |            |            |      |
| Muridae                     |            |            |                 |            |            |            |            |      |
| Gasterosteus_aculeatus      |            |            |                 |            |            |            |            |      |
| Felis_silvestris            |            |            |                 |            |            |            |            |      |
| Rattus                      |            |            |                 |            |            |            |            |      |
| Papio_hamadryas             |            |            |                 |            |            |            |            |      |
| Pan_troglodytes             |            |            |                 |            |            |            |            |      |
| Ailuropoda_melanoleuca      |            |            |                 |            |            |            |            |      |
| Cavia_porcellus             |            |            |                 |            |            |            |            |      |
| Ictidomys_tridecemlineatus  |            |            |                 |            |            |            |            |      |
| Canis                       |            |            |                 |            |            |            |            |      |
| Felis_catus                 |            |            |                 |            |            |            |            |      |
| Ochotona_princeps           |            |            |                 |            |            |            |            |      |
| Cercopithecidae             |            |            |                 |            |            |            |            |      |
| Carnivora                   |            |            |                 |            |            |            |            |      |
| Mus                         |            |            |                 |            |            |            |            |      |
| Mus_musculus                |            |            |                 |            |            |            |            |      |
| Rattus_norvegicus           |            |            |                 |            |            |            |            |      |
| Tursiops_truncatus          |            |            |                 |            |            |            |            |      |
| Procapra_capensis           |            |            |                 |            |            |            |            |      |
| Primates                    |            |            |                 |            |            |            |            |      |
| Echinops_telfairi           |            |            |                 |            |            |            |            |      |
| Sorex_araneus               |            |            |                 |            |            |            |            |      |
| Canidae                     |            |            |                 |            |            |            |            |      |
| Otolemur_garnettii          |            |            |                 |            |            |            |            |      |
| Gallus                      |            |            |                 |            |            |            |            |      |
| Callithrix_jacchus          |            |            |                 |            |            |            |            |      |
| Crocodylus_porosus          |            |            |                 |            |            |            |            |      |
| Erinaceus_europaeus         |            |            |                 |            |            |            |            |      |
| rnd-6_family-7426-LTR-ERV1  |            |            |                 |            |            |            |            |      |
| Esox_lucius                 |            |            |                 |            |            |            |            |      |
| Salmo_salar                 |            |            |                 |            |            |            |            |      |
| Didelphidae                 |            |            |                 |            |            |            |            |      |
| Latimeria_chalumnae         |            |            |                 |            |            |            |            |      |
| Monodelphis_domestica       |            |            |                 |            |            |            |            |      |
| Macropus_eugenii            |            |            |                 |            |            |            |            |      |
| Alligator_mississippiensis  |            |            |                 |            |            |            |            |      |
| Chrysemys_picta_bellii      |            |            |                 |            |            |            |            |      |
| Danio_rerio                 |            |            |                 |            |            |            |            |      |
| Taeniopygia                 |            |            |                 |            |            |            |            |      |
| Dasyus_novemcinctus         |            |            |                 |            |            |            |            |      |
| LTR_XT                      |            |            |                 |            |            |            |            |      |
| Haplorrhini                 | CTAGGCCAGG | TCAGGAGACC | AGGACAGGTC      | AGGAAGGTCA | GCCTAGACTA | GAGAGAGATC | AATGTGCGAG | 2443 |
| Catarrhini                  | GAAAGGGGGG | TTCCGGGAAG | AATAC - - CC    | AGTCTAATCG | CCCACGCTTG | CAACGTAACC | AATGGCCTA  | 2017 |
| Anolis_carolinensis         |            |            |                 |            |            |            |            |      |
| Murine_leukemia_virus       | GAGAGATGAG | CAAGCTCTTG | GCCAC - - - - - | -TGTAGTTAN | TGGTCAGAGA | CAGGATAGAC | AGGGGGGAGA | 1977 |
| Phascolarctos_cinereus      | GAGAAAAGGT | TCAGAGGGAG | ACAG - - - - -  | -GCAGGGAA  | TC-TGAGCAA | CAGGGCAATG | AGGGCACCTA | 1897 |
| Estrildidae                 |            |            |                 |            |            |            |            |      |
| Xenopus_Silurana_tropicalis |            |            |                 |            |            |            |            |      |
| L_XT                        | NGNNNAACNG | ATATCTCNGC | ATNTGNNTTG      | AAATGGCAAG | ACANTGNCGG | CTNTNNGNA  | CTTANANGNT | 1929 |
| Takifugu_rubripes           |            |            |                 |            |            |            |            |      |
| Bos_taurus                  |            |            |                 |            |            |            |            |      |
| Homo_sapiens                |            |            |                 |            |            |            |            |      |
| Microcebus_murinus          |            |            |                 |            |            |            |            |      |
| Myotis_lucifugus            |            |            |                 |            |            |            |            |      |
| Equus_caballus              |            |            |                 |            |            |            |            |      |
| Tupaia_belangeri            |            |            |                 |            |            |            |            |      |
| Loxodonta_africana          |            |            |                 |            |            |            |            |      |
| Murinae                     |            |            |                 |            |            |            |            |      |
| Canis_lupus_familiaris      |            |            |                 |            |            |            |            |      |
| Sus_scrofa                  |            |            |                 |            |            |            |            |      |
| Choloepus_hoffmanni         |            |            |                 |            |            |            |            |      |
| Vicugna_pacos               |            |            |                 |            |            |            |            |      |
| Gavialis_gangeticus         |            |            |                 |            |            |            |            |      |
| Mammalia                    |            |            |                 |            |            |            |            |      |
| Passeroidea                 |            |            |                 |            |            |            |            |      |
| Takifugu                    |            |            |                 |            |            |            |            |      |
| Pteropus_vampyrus           |            |            |                 |            |            |            |            |      |
| Ornithorhynchus             |            |            |                 |            |            |            |            |      |
| Oryctolagus_cuniculus       |            |            |                 |            |            |            |            |      |
| Gallus_gallus               |            |            |                 |            |            |            |            |      |
| Hominidae                   |            |            |                 |            |            |            |            |      |
| Metatheria                  |            |            |                 |            |            |            |            |      |
| Rodentia                    |            |            |                 |            |            |            |            |      |
| Monodelphis                 |            |            |                 |            |            |            |            |      |
| Consensus                   |            |            |                 |            |            |            |            |      |
| Conservation                | 100%       |            |                 |            |            |            |            | 0%   |

|                             | 2,460      | 2,480      | 2,500      | 2,520      |            |            |            |      |
|-----------------------------|------------|------------|------------|------------|------------|------------|------------|------|
| Dipodomys_ordii             | ----       | ----       | ----       | ----       | -          |            |            |      |
| Laurasiatheria              | ----       | ----       | ----       | ----       | -          |            |            |      |
| Eutheria                    | ----       | ----       | ----       | ----       | -          |            |            |      |
| Tarsius_syrichta            | ----       | ----       | ----       | ----       | -          |            |            |      |
| Muridae                     | ----       | ----       | ----       | ----       | -          |            |            |      |
| Gasterosteus_aculeatus      | ----       | ----       | ----       | ----       | -          |            |            |      |
| Felis_silvestris            | ----       | ----       | ----       | ----       | -          |            |            |      |
| Rattus                      | ----       | ----       | ----       | ----       | -          |            |            |      |
| Papio_hamadryas             | ----       | ----       | ----       | ----       | -          |            |            |      |
| Pan_troglodytes             | ----       | ----       | ----       | ----       | -          |            |            |      |
| Ailuropoda_melanoleuca      | ----       | ----       | ----       | ----       | -          |            |            |      |
| Cavia_porcellus             | ----       | ----       | ----       | ----       | -          |            |            |      |
| Ictidomys_tridecemlineatus  | ----       | ----       | ----       | ----       | -          |            |            |      |
| Canis                       | ----       | ----       | ----       | ----       | -          |            |            |      |
| Felis_catus                 | ----       | ----       | ----       | ----       | -          |            |            |      |
| Ochotona_princeps           | ----       | ----       | ----       | ----       | -          |            |            |      |
| Cercopithecidae             | ----       | ----       | ----       | ----       | -          |            |            |      |
| Carnivora                   | ----       | ----       | ----       | ----       | -          |            |            |      |
| Mus                         | ----       | ----       | ----       | ----       | -          |            |            |      |
| Mus_musculus                | ----       | ----       | ----       | ----       | -          |            |            |      |
| Rattus_norvegicus           | ----       | ----       | ----       | ----       | -          |            |            |      |
| Tursiops_truncatus          | ----       | ----       | ----       | ----       | -          |            |            |      |
| Procapra_capensis           | ----       | ----       | ----       | ----       | -          |            |            |      |
| Primates                    | ----       | ----       | ----       | ----       | -          |            |            |      |
| Echinops_telfairi           | ----       | ----       | ----       | ----       | -          |            |            |      |
| Sorex_araneus               | ----       | ----       | ----       | ----       | -          |            |            |      |
| Canidae                     | ----       | ----       | ----       | ----       | -          |            |            |      |
| Otomomys_garnettii          | ----       | ----       | ----       | ----       | -          |            |            |      |
| Gallus                      | ----       | ----       | ----       | ----       | -          |            |            |      |
| Callithrix_jacchus          | ----       | ----       | ----       | ----       | -          |            |            |      |
| Crocodylus_porosus          | ----       | ----       | ----       | ----       | -          |            |            |      |
| Erinaceus_europaeus         | ----       | ----       | ----       | ----       | -          |            |            |      |
| rnd-6_family-7426-LTR-ERV1  | ----       | ----       | ----       | ----       | -          |            |            |      |
| Esox_lucius                 | ----       | ----       | ----       | ----       | -          |            |            |      |
| Salmo_salar                 | ----       | ----       | ----       | ----       | -          |            |            |      |
| Didelphidae                 | ----       | ----       | ----       | ----       | -          |            |            |      |
| Latimeria_chalumnae         | ----       | ----       | ----       | ----       | -          |            |            |      |
| Monodelphis_domestica       | ----       | ----       | ----       | ----       | -          |            |            |      |
| Macropus_eugenii            | ----       | ----       | ----       | ----       | -          |            |            |      |
| Alligator_mississippiensis  | ----       | ----       | ----       | ----       | -          |            |            |      |
| Chrysemys_picta_bellii      | ----       | ----       | ----       | ----       | -          |            |            |      |
| Danio_rerio                 | ----       | ----       | ----       | ----       | -          |            |            |      |
| Taeniopygia                 | ----       | ----       | ----       | ----       | -          |            |            |      |
| Dasybus_novemcinctus        | ----       | ----       | ----       | ----       | -          |            |            |      |
| LTR_XT                      | ----       | ----       | ----       | ----       | -          |            |            |      |
| Haplorrhini                 | ATGCAAGCAA | AGAGGGCATT | GG-AAAGATG | AATGTCCAGA | GAAAGAAAAG | GATAAAGGCA | ACAACCAGGG | 2512 |
| Catarrhini                  | TTGTAAGGAA | ATAGGACATT | GG-AAAGATA | AGTGTCCC-- | -CAACTGAAG | GAAAAGCAAG | GTGATTCGGA | 2083 |
| Anolis_carolinensis         | ----       | ----       | ----       | ----       | ----       | ----       | ----       | -    |
| Murine_leukemia_virus       | GCGAAGGAGG | CCC-CAACTT | GATAAGGACC | AATGCGCC-- | -TACTGCAA  | GAAAAG--G  | GACACTGGGC | 2040 |
| Phascolarctos_cinereus      | GGGAAGGAAG | ACCGCCTCTG | GACAAAGATC | AGTGCACA-- | -TACTGTAAA | GAAAG--G   | GCCATTGGGC | 1961 |
| Estrildidae                 | ----       | ----       | ----       | ----       | ----       | ----       | ----       | -    |
| Xenopus_Silurana_tropicalis | ----       | ----       | ----       | ----       | ----       | ----       | ----       | -    |
| IXT                         | TAGTNCANAN | GTNACTGAT  | GTATGGGNNC | AAAAAAAGNA | TGAATGTNGT | ATAATAGANG | NTGTGNNNGN | 1999 |
| Takifugu_rubripes           | ----       | ----       | ----       | ----       | ----       | ----       | ----       | -    |
| Bos_taurus                  | ----       | ----       | ----       | ----       | ----       | ----       | ----       | -    |
| Homo_sapiens                | ----       | ----       | ----       | ----       | ----       | ----       | ----       | -    |
| Microcebus_murinus          | ----       | ----       | ----       | ----       | ----       | ----       | ----       | -    |
| Myotis_lucifugus            | ----       | ----       | ----       | ----       | ----       | ----       | ----       | -    |
| Equus_caballus              | ----       | ----       | ----       | ----       | ----       | ----       | ----       | -    |
| Tupaia_belangeri            | ----       | ----       | ----       | ----       | ----       | ----       | ----       | -    |
| Loxodonta_africana          | ----       | ----       | ----       | ----       | ----       | ----       | ----       | -    |
| Murinae                     | ----       | ----       | ----       | ----       | ----       | ----       | ----       | -    |
| Canis_lupus_familiaris      | ----       | ----       | ----       | ----       | ----       | ----       | ----       | -    |
| Sus_scrofa                  | ----       | ----       | ----       | ----       | ----       | ----       | ----       | -    |
| Choloepus_hoffmanni         | ----       | ----       | ----       | ----       | ----       | ----       | ----       | -    |
| Vicugna_pacos               | ----       | ----       | ----       | ----       | ----       | ----       | ----       | -    |
| Gavialis_gangeticus         | ----       | ----       | ----       | ----       | ----       | ----       | ----       | -    |
| Mammalia                    | ----       | ----       | ----       | ----       | ----       | ----       | ----       | -    |
| Passeroidea                 | ----       | ----       | ----       | ----       | ----       | ----       | ----       | -    |
| Takifugu                    | ----       | ----       | ----       | ----       | ----       | ----       | ----       | -    |
| Pteropus_vampyrus           | ----       | ----       | ----       | ----       | ----       | ----       | ----       | -    |
| Ornithorhynchus             | ----       | ----       | ----       | ----       | ----       | ----       | ----       | -    |
| Oryctolagus_cuniculus       | ----       | ----       | ----       | ----       | ----       | ----       | ----       | -    |
| Gallus_gallus               | ----       | ----       | ----       | ----       | ----       | ----       | ----       | -    |
| Hominidae                   | ----       | ----       | ----       | ----       | ----       | ----       | ----       | -    |
| Metatheria                  | ----       | ----       | ----       | ----       | ----       | ----       | ----       | -    |
| Rodentia                    | ----       | ----       | ----       | ----       | ----       | ----       | ----       | -    |
| Monodelphis                 | ----       | ----       | ----       | ----       | ----       | ----       | ----       | -    |
| Consensus                   | ----       | ----       | ----       | ----       | ----       | ----       | ----       | -    |
| Conservation                | 100%       | 0%         | 0%         | 0%         | 0%         | 0%         | 0%         | -    |



|                             | 2,540       | 2,560      | 2,580      |            |            |            |             |      |
|-----------------------------|-------------|------------|------------|------------|------------|------------|-------------|------|
| Dipodomys_ordii             |             |            |            |            |            |            |             |      |
| Laurasiatheria              |             |            |            |            |            |            |             |      |
| Eutheria                    |             |            |            |            |            |            |             |      |
| Tarsius_syrichta            |             |            |            |            |            |            |             |      |
| Muridae                     |             |            |            |            |            |            |             |      |
| Gasterosteus_aculeatus      |             |            |            |            |            |            |             |      |
| Felis_silvestris            |             |            |            |            |            |            |             |      |
| Rattus                      |             |            |            |            |            |            |             |      |
| Papio_hamadryas             |             |            |            |            |            |            |             |      |
| Pan_troglodytes             |             |            |            |            |            |            |             |      |
| Ailuropoda_melanoleuca      |             |            |            |            |            |            |             |      |
| Cavia_porcellus             |             |            |            |            |            |            |             |      |
| Ictidomys_tridecemlineatus  |             |            |            |            |            |            |             |      |
| Canis                       |             |            |            |            |            |            |             |      |
| Felis_catus                 |             |            |            |            |            |            |             |      |
| Ochotona_princeps           |             |            |            |            |            |            |             |      |
| Cercopithecidae             |             |            |            |            |            |            |             |      |
| Carnivora                   |             |            |            |            |            |            |             |      |
| Mus                         |             |            |            |            |            |            |             |      |
| Mus_musculus                |             |            |            |            |            |            |             |      |
| Rattus_norvegicus           |             |            |            |            |            |            |             |      |
| Tursiops_truncatus          |             |            |            |            |            |            |             |      |
| Procyon_capensis            |             |            |            |            |            |            |             |      |
| Primates                    |             |            |            |            |            |            |             |      |
| Echinops_telfairi           |             |            |            |            |            |            |             |      |
| Sorex_araneus               |             |            |            |            |            |            |             |      |
| Canidae                     |             |            |            |            |            |            |             |      |
| Otomomys_garnettii          |             |            |            |            |            |            |             |      |
| Gallus                      |             |            |            |            |            |            |             |      |
| Callithrix_jacchus          |             |            |            |            |            |            |             |      |
| Crocodylus_porosus          |             |            |            |            |            |            |             |      |
| Erinaceus_europaeus         |             |            |            |            |            |            |             |      |
| rnd-6_family-7426-LTR-ERV1  |             |            |            |            |            |            |             |      |
| Esox_lucius                 |             |            |            |            |            |            |             |      |
| Salmo_salar                 |             |            |            |            |            |            |             |      |
| Didelphidae                 |             |            |            |            |            |            |             |      |
| Latimeria_chalumnae         |             |            |            |            |            |            |             |      |
| Monodelphis_domestica       |             |            |            |            |            |            |             |      |
| Macropus_eugenii            |             |            |            |            |            |            |             |      |
| Alligator_mississippiensis  |             |            |            |            |            |            |             |      |
| Chrysemys_picta_bellii      |             |            |            |            |            |            |             |      |
| Danio_rerio                 |             |            |            |            |            |            |             |      |
| Taeniopygia                 |             |            |            |            |            |            |             |      |
| Dasyus_novemcinctus         |             |            |            |            |            |            |             |      |
| LTR_XT                      |             |            |            |            |            |            |             |      |
| Haplorrhini                 | ACAGAAATGGC | TGGACAGGGC | CTCCTTCCGC | CGCTGGGCAG | GGCATAGTAG | GATCCGACGT | GGATCTAATT  | 2582 |
| Catarrhini                  | ACAAAA      | -GAC       | CTC        |            | -AGATA     | AAGACGAGGG | AGCTTTGTTC  | 2120 |
| Anolis_carolinensis         |             |            |            |            |            |            |             |      |
| Murine_leukemia_virus       | TAAGGA      | -CTGC      | CCAA       |            | -AGAAG     | CCACGAGGGC | CCCGAGGACC  | 2079 |
| Phascolarctos_cinereus      | AAGGGA      | -GTGC      | CCCC       |            | -GGAAG     | -AAGAACGC  | CAGGGAAAACC | 1998 |
| Estrildidae                 |             |            |            |            |            |            |             |      |
| Xenopus_Silurana_tropicalis |             |            |            |            |            |            |             |      |
| LTR_XT                      | TGATANTAGG  | AANAGATCCT | NACCCANAGA | GGCNGTACGA | CTNNANCCTA | ANGCANTGGN | ACCNTATGNT  | 2069 |
| Takifugu_rubripes           |             |            |            |            |            |            |             |      |
| Bos_taurus                  |             |            |            |            |            |            |             |      |
| Homo_sapiens                |             |            |            |            |            |            |             |      |
| Microcebus_murinus          |             |            |            |            |            |            |             |      |
| Myotis_lucifugus            |             |            |            |            |            |            |             |      |
| Equus_caballus              |             |            |            |            |            |            |             |      |
| Tupaia_belangeri            |             |            |            |            |            |            |             |      |
| Loxodonta_africana          |             |            |            |            |            |            |             |      |
| Murinae                     |             |            |            |            |            |            |             |      |
| Canis_lupus_familiaris      |             |            |            |            |            |            |             |      |
| Sus_scrofa                  |             |            |            |            |            |            |             |      |
| Choloepus_hoffmanni         |             |            |            |            |            |            |             |      |
| Vicugna_pacos               |             |            |            |            |            |            |             |      |
| Gavialis_gangeticus         |             |            |            |            |            |            |             |      |
| Mammalia                    |             |            |            |            |            |            |             |      |
| Passeroidea                 |             |            |            |            |            |            |             |      |
| Takifugu                    |             |            |            |            |            |            |             |      |
| Pteropus_vampyrus           |             |            |            |            |            |            |             |      |
| Ornithorhynchus             |             |            |            |            |            |            |             |      |
| Oryctolagus_cuniculus       |             |            |            |            |            |            |             |      |
| Gallus_gallus               |             |            |            |            |            |            |             |      |
| Hominidae                   |             |            |            |            |            |            |             |      |
| Metatheria                  |             |            |            |            |            |            |             |      |
| Rodentia                    |             |            |            |            |            |            |             |      |
| Monodelphis                 |             |            |            |            |            |            |             |      |
| Consensus                   |             |            |            |            |            |            |             |      |
| Conservation                | 100%        |            |            |            |            |            |             |      |
|                             | 0%          |            |            |            |            |            |             |      |

|                             | 2,600          | 2,620          | 2,640         | 2,660      |            |                 |                  |      |
|-----------------------------|----------------|----------------|---------------|------------|------------|-----------------|------------------|------|
| Dipodomys_ordii             |                |                |               |            |            |                 |                  |      |
| Laurasiatheria              |                |                |               |            |            |                 |                  |      |
| Eutheria                    |                |                |               |            |            |                 |                  |      |
| Tarsius_syricha             |                |                |               |            |            |                 |                  |      |
| Muridae                     |                |                |               |            |            |                 |                  |      |
| Gasterosteus_aculeatus      |                |                |               |            |            |                 |                  |      |
| Felis_silvestris            |                |                |               |            |            |                 |                  |      |
| Rattus                      |                |                |               |            |            |                 |                  |      |
| Papio_hamadryas             |                |                |               |            |            |                 |                  |      |
| Pan_troglodytes             |                |                |               |            |            |                 |                  |      |
| Ailuropoda_melanoleuca      |                |                |               |            |            |                 |                  |      |
| Cavia_porcellus             |                |                |               |            |            |                 |                  |      |
| Ictidomys_tridecemlineatus  |                |                |               |            |            |                 |                  |      |
| Canis                       |                |                |               |            |            |                 |                  |      |
| Felis_catus                 |                |                |               |            |            |                 |                  |      |
| Ochotona_princeps           |                |                |               |            |            |                 |                  |      |
| Cercopithecidae             |                |                |               |            |            |                 |                  |      |
| Carnivora                   |                |                |               |            |            |                 |                  |      |
| Mus                         |                |                |               |            |            |                 |                  |      |
| Mus_musculus                |                |                |               |            |            |                 |                  |      |
| Rattus_norvegicus           |                |                |               |            |            |                 |                  |      |
| Tursiops_truncatus          |                |                |               |            |            |                 |                  |      |
| Procyon_capensis            |                |                |               |            |            |                 |                  |      |
| Primates                    |                |                |               |            |            |                 |                  |      |
| Echinops_telfairi           |                |                |               |            |            |                 |                  |      |
| Sorex_araneus               |                |                |               |            |            |                 |                  |      |
| Canidae                     |                |                |               |            |            |                 |                  |      |
| Otomomys_garnettii          |                |                |               |            |            |                 |                  |      |
| Gallus                      |                |                |               |            |            |                 |                  |      |
| Callithrix_jacchus          |                |                |               |            |            |                 |                  |      |
| Crocodylus_porosus          |                |                |               |            |            |                 |                  |      |
| Erinaceus_europaeus         |                |                |               |            |            |                 |                  |      |
| rnd-6_family-7426-LTR-ERV1  |                |                |               |            |            |                 |                  |      |
| Esox_lucius                 |                |                |               |            |            |                 |                  |      |
| Salmo_salar                 |                |                |               |            |            |                 |                  |      |
| Didelphidae                 |                |                |               |            |            |                 |                  |      |
| Latimeria_chalumnae         |                |                |               |            |            |                 |                  |      |
| Monodelphis_domestica       |                |                |               |            |            |                 |                  |      |
| Macropus_eugenii            |                |                |               |            |            |                 |                  |      |
| Alligator_mississippiensis  |                |                |               |            |            |                 |                  |      |
| Chrysemys_picta_bellii      |                |                |               |            |            |                 |                  |      |
| Danio_rerio                 |                |                |               |            |            |                 |                  |      |
| Taeniopygia                 |                |                |               |            |            |                 |                  |      |
| Dasyus_novemcinctus         |                |                |               |            |            |                 |                  |      |
| LTR_XT                      |                |                |               |            |            |                 |                  |      |
| Haplorrhini                 | GGGCTGGCAG     | GAGCCAACGA     | CTACCTTGAA    | GACTGAGACA | GACCGGGCTC | CATCTCATT       | GGCCCCGAGG       | 2652 |
| Catarrhini                  | AATCTGGCTG     | AAG - - - - GG | CTACT - - - G | GACTGAAGGG | GACCGGGCTC | AAGGCG - - - -  | - - - - CCGCAAGG | 2175 |
| Anolis_carolinensis         |                |                |               |            |            |                 |                  |      |
| Murine_leukemia_virus       | GAGGCCCCAG     | ACCTCCCTCC     | TGACCTTAGG    | TGACTAGGGA | GGTCAGGGTC | AGGAGCC - - - - | - - - - CCCCCTG  | 2144 |
| Phascolarctos_cinereus      | AATG - - - - - | - - - - - TCC  | TGACCTGGG     | TGACTAGGGG | AGTCGGGGTT | CGGACCC - - - - | - - - - CCTCCCC  | 2050 |
| Estrildidae                 |                |                |               |            |            |                 |                  |      |
| Xenopus_Silurana_tropicalis |                |                |               |            |            |                 |                  |      |
| LTR_XT                      | ANAATTANTN     | NNGANCTNNA     | AACAGCAGGG    | TNAATNANTA | AAANANAANC | CANANNTN - A    | NNATCCTNNA       | 2138 |
| Takifugu_rubripes           |                |                |               |            |            |                 |                  |      |
| Bos_taurus                  |                |                |               |            |            |                 |                  |      |
| Homo_sapiens                |                |                |               |            |            |                 |                  |      |
| Microcebus_murinus          |                |                |               |            |            |                 |                  |      |
| Myotis_lucifugus            |                |                |               |            |            |                 |                  |      |
| Equus_caballus              |                |                |               |            |            |                 |                  |      |
| Tupaia_belangeri            |                |                |               |            |            |                 |                  |      |
| Loxodonta_africana          |                |                |               |            |            |                 |                  |      |
| Murinae                     |                |                |               |            |            |                 |                  |      |
| Canis_lupus_familiaris      |                |                |               |            |            |                 |                  |      |
| Sus_scrofa                  |                |                |               |            |            |                 |                  |      |
| Choloepus_hoffmanni         |                |                |               |            |            |                 |                  |      |
| Vicugna_pacos               |                |                |               |            |            |                 |                  |      |
| Gavialis_gangeticus         |                |                |               |            |            |                 |                  |      |
| Mammalia                    |                |                |               |            |            |                 |                  |      |
| Passeroidea                 |                |                |               |            |            |                 |                  |      |
| Takifugu                    |                |                |               |            |            |                 |                  |      |
| Pteropus_vampyrus           |                |                |               |            |            |                 |                  |      |
| Ornithorhynchus             |                |                |               |            |            |                 |                  |      |
| Oryctolagus_cuniculus       |                |                |               |            |            |                 |                  |      |
| Gallus_gallus               |                |                |               |            |            |                 |                  |      |
| Hominidae                   |                |                |               |            |            |                 |                  |      |
| Metatheria                  |                |                |               |            |            |                 |                  |      |
| Rodentia                    |                |                |               |            |            |                 |                  |      |
| Monodelphis                 |                |                |               |            |            |                 |                  |      |
| Consensus                   |                |                |               |            |            |                 |                  |      |
| Conservation                | 100%           |                |               |            |            |                 |                  |      |
|                             | 0%             |                |               |            |            |                 |                  |      |

|                             | 2,680      |            | 2,700      |            | 2,720      |             |            |      |
|-----------------------------|------------|------------|------------|------------|------------|-------------|------------|------|
| Dipodomys_ordii             |            |            |            |            |            |             |            |      |
| Laurasiatheria              |            |            |            |            |            |             |            |      |
| Eutheria                    |            |            |            |            |            |             |            |      |
| Tarsius_syrichta            |            |            |            |            |            |             |            |      |
| Muridae                     |            |            |            |            |            |             |            |      |
| Gasterosteus_aculeatus      |            |            |            |            |            |             |            |      |
| Felis_silvestris            |            |            |            |            |            |             |            |      |
| Rattus                      |            |            |            |            |            |             |            |      |
| Papio_hamadryas             |            |            | TGG        | GGGCTCGTCC | GGGATTTGAG | AGGCGGCCAG  | AGGACACCGG | 43   |
| Pan_troglodytes             |            |            |            |            |            |             |            |      |
| Ailuropoda_melanoleuca      |            |            |            |            |            |             |            |      |
| Cavia_porcellus             |            |            |            |            |            |             |            |      |
| Ictidomys_tridecemlineatus  |            |            |            |            |            |             |            |      |
| Canis                       |            |            |            |            |            |             |            |      |
| Felis_catus                 |            |            |            |            |            |             |            |      |
| Ochotona_princeps           |            |            |            |            |            |             |            |      |
| Cercopithecidae             |            |            |            |            |            |             |            |      |
| Carnivora                   |            |            |            |            |            |             |            |      |
| Mus                         |            |            |            |            |            |             |            |      |
| Mus_musculus                |            |            |            |            |            |             |            |      |
| Rattus_norvegicus           |            |            |            |            |            |             |            |      |
| Tursiops_truncatus          |            |            |            |            |            |             |            |      |
| Procyon_capensis            |            |            |            |            |            |             |            |      |
| Primates                    |            |            |            |            |            |             |            |      |
| Echinops_telfairi           |            |            |            |            |            |             |            |      |
| Sorex_araneus               |            |            |            |            |            |             |            |      |
| Canidae                     |            |            |            |            |            |             |            |      |
| Otomomys_garnettii          |            |            |            |            |            |             |            |      |
| Gallus                      |            |            |            |            |            |             |            |      |
| Callithrix_jacchus          |            |            |            |            |            |             |            |      |
| Crocodylus_porosus          |            |            |            |            |            |             |            |      |
| Erinaceus_europaeus         |            |            |            |            |            |             |            |      |
| rnd-6_family-7426-LTR-ERV1  |            |            |            |            |            |             |            |      |
| Esox_lucius                 |            |            |            |            |            |             |            |      |
| Salmo_salar                 |            |            |            |            |            |             |            |      |
| Didelphidae                 |            |            |            |            |            |             |            |      |
| Latimeria_chalumnae         |            |            |            |            |            |             |            |      |
| Monodelphis_domestica       |            |            |            |            |            |             |            |      |
| Macropus_eugenii            |            |            |            |            |            |             |            |      |
| Alligator_mississippiensis  |            |            |            |            |            |             |            |      |
| Chrysemys_picta_bellii      |            |            |            |            |            |             |            |      |
| Danio_rerio                 |            |            |            |            |            |             |            |      |
| Taeniopygia                 |            |            |            |            |            |             |            |      |
| Dasyatis_novemcinctus       |            |            |            |            |            |             |            |      |
| LTR_XT                      |            |            |            |            |            |             |            |      |
| Haplorrhini                 | AGCCCATGGT | CTCAATGGTA | GTAGGGGGCC | GAAAAACAGA | CTTTATGGTA | GACACAGGTG  | CTGAACACTC | 2722 |
| Catarrhini                  | AGCCACGGT  | CAGGATTACA | ACTGGGGGCA | AGGACATTAA | GTTTTTGGTC | GATACTGGTG  | CTGAACATTC | 2245 |
| Anolis_carolinensis         |            |            |            |            |            |             |            |      |
| Murine_leukemia_virus       | AACCCAGGAT | AACCCCTCAA | GTCCGGGGGC | AACCCGTCAC | CTTCCTGGTA | GATACTGGGG  | CCCAACACTC | 2214 |
| Phascogalea_cinerea         | AGCCACGGT  | AACGTTAACT | GTGGAGGGGA | TCCCCACTGA | GTTTTTGGTT | GATACCGGGG  | CCGAACATTC | 2120 |
| Estrildidae                 |            |            |            |            |            |             |            |      |
| Xenopus_Silurana_tropicalis |            |            |            |            |            |             |            |      |
| LTR_XT                      | TGGCCAGTAA | AAAANNNGA  | NGGTANATGG | NGANTNACNN | TTGNTNAAAG | GATGNTNAAAT | NAAGNACCCC | 2208 |
| Takifugu_rubripes           |            |            |            |            |            |             |            |      |
| Bos_taurus                  |            |            |            |            |            |             |            |      |
| Homo_sapiens                |            |            |            |            |            |             |            |      |
| Microcebus_murinus          |            |            |            |            |            |             |            |      |
| Myotis_lucifugus            |            |            |            |            |            |             |            |      |
| Equus_caballus              |            |            |            |            |            |             |            |      |
| Tupaia_belangeri            |            |            |            |            |            |             |            |      |
| Loxodonta_africana          |            |            |            |            |            |             |            |      |
| Murinae                     |            |            |            |            |            |             |            |      |
| Canis_lupus_familiaris      |            |            |            |            |            |             |            |      |
| Sus_scrofa                  |            |            |            |            |            |             |            |      |
| Choloepus_hoffmanni         |            |            |            |            |            |             |            |      |
| Vicugna_pacos               |            |            |            |            |            |             |            |      |
| Gavialis_gangeticus         |            |            |            |            |            |             |            |      |
| Mammalia                    |            |            |            |            |            |             |            |      |
| Passeroidea                 |            |            |            |            |            |             |            |      |
| Takifugu                    |            |            |            |            |            |             |            |      |
| Pteropus_vampyrus           |            |            |            |            |            |             |            |      |
| Ornithorhynchus             |            |            |            |            |            |             |            |      |
| Oryzotolagus_cuniculus      |            |            |            |            |            |             |            |      |
| Gallus_gallus               |            |            |            |            |            |             |            |      |
| Hominidae                   |            |            |            |            |            |             |            |      |
| Metatheria                  |            |            |            |            |            |             |            |      |
| Rodentia                    |            |            |            |            |            |             |            |      |
| Monodelphis                 |            |            |            |            |            |             |            |      |
| Consensus                   |            |            |            |            |            |             |            |      |
| Conservation                | 100%       |            |            |            |            |             |            |      |
|                             | 0%         |            |            |            |            |             |            |      |

|                             | 2,740             | 2,760             | 2,780             | 2,800             |                    |                   |                   |      |
|-----------------------------|-------------------|-------------------|-------------------|-------------------|--------------------|-------------------|-------------------|------|
| Dipodomys_ordii             | -----             | -----             | -----             | -----             | -                  |                   |                   |      |
| Laurasiatheria              | -----             | -----             | -----             | -----             | -                  |                   |                   |      |
| Eutheria                    | -----             | -----             | -----             | -----             | -                  |                   |                   |      |
| Tarsius_syrichta            | -----             | -----             | -----             | -----             | -                  |                   |                   |      |
| Muridae                     | -----             | -----             | -----             | -----             | -                  |                   |                   |      |
| Gasterosteus_aculeatus      | -----             | -----             | -----             | -----             | -                  |                   |                   |      |
| Felis_silvestris            | -----             | -----             | -----             | -----             | -                  |                   |                   |      |
| Rattus                      | -----             | -----             | -----             | -----             | -                  |                   |                   |      |
| Papio_hamadryas             | <b>CCCCTTTTCC</b> | <b>TTTTCGGCAG</b> | <b>AAACCGCGCG</b> | <b>GCCCCGGCCA</b> | <b>CCGGTGGCGG</b>  | <b>ACGGACGACG</b> | <b>GGACGACTCT</b> | 113  |
| Pan_troglodytes             | -----             | -----             | -----             | -----             | -                  |                   |                   |      |
| Ailuropoda_melanoleuca      | -----             | -----             | -----             | -----             | -                  |                   |                   |      |
| Cavia_porcellus             | -----             | -----             | -----             | -----             | -                  |                   |                   |      |
| Ictidomys_tridecemlineatus  | -----             | -----             | -----             | -----             | -                  |                   |                   |      |
| Canis                       | -----             | -----             | -----             | -----             | -                  |                   |                   |      |
| Felis_catus                 | -----             | -----             | -----             | -----             | -                  |                   |                   |      |
| Ochotona_princeps           | -----             | -----             | -----             | -----             | -                  |                   |                   |      |
| Cercopithecidae             | -----             | -----             | -----             | -----             | -                  |                   |                   |      |
| Carnivora                   | -----             | -----             | -----             | -----             | -                  |                   |                   |      |
| Mus                         | -----             | -----             | -----             | -----             | -                  |                   |                   |      |
| Mus_musculus                | -----             | -----             | -----             | -----             | -                  |                   |                   |      |
| Rattus_norvegicus           | -----             | -----             | -----             | -----             | -                  |                   |                   |      |
| Tursiops_truncatus          | -----             | -----             | -----             | -----             | -                  |                   |                   |      |
| Procapra_capensis           | -----             | -----             | -----             | -----             | -                  |                   |                   |      |
| Primates                    | -----             | -----             | -----             | -----             | -                  |                   |                   |      |
| Echinops_telfairi           | -----             | -----             | -----             | -----             | -                  |                   |                   |      |
| Sorex_araneus               | -----             | -----             | -----             | -----             | -                  |                   |                   |      |
| Canidae                     | -----             | -----             | -----             | -----             | -                  |                   |                   |      |
| Otomur_garnettii            | -----             | -----             | -----             | -----             | -                  |                   |                   |      |
| Gallus                      | -----             | -----             | -----             | -----             | -                  |                   |                   |      |
| Callithrix_jacchus          | -----             | -----             | -----             | -----             | -                  |                   |                   |      |
| Crocodylus_porosus          | -----             | -----             | -----             | -----             | -                  |                   |                   |      |
| Erinaceus_europaeus         | -----             | -----             | -----             | -----             | -                  |                   |                   |      |
| rnd-6_family-7426-LTR-ERV1  | -----             | -----             | -----             | -----             | -                  |                   |                   |      |
| Esox_lucius                 | -----             | -----             | -----             | -----             | -                  |                   |                   |      |
| Salmo_salar                 | -----             | -----             | -----             | -----             | -                  |                   |                   |      |
| Didelphidae                 | -----             | -----             | -----             | -----             | -                  |                   |                   |      |
| Latimeria_chalumnae         | -----             | -----             | -----             | -----             | -                  |                   |                   |      |
| Monodelphis_domestica       | -----             | -----             | -----             | -----             | -                  |                   |                   |      |
| Macropus_eugenii            | -----             | -----             | -----             | -----             | -                  |                   |                   |      |
| Alligator_mississippiensis  | -----             | -----             | -----             | -----             | -                  |                   |                   |      |
| Chrysemys_picta_bellii      | -----             | -----             | -----             | -----             | -                  |                   |                   |      |
| Danio_rerio                 | -----             | -----             | -----             | -----             | -                  |                   |                   |      |
| Taeniopygia                 | -----             | -----             | -----             | -----             | -                  |                   |                   |      |
| Dasyus_novemcinctus         | -----             | -----             | -----             | -----             | -                  |                   |                   |      |
| LTR_XT                      | -----             | -----             | -----             | -----             | -                  |                   |                   |      |
| Haplorrhini                 | <b>GGTTGTGACT</b> | <b>CAAACAATTG</b> | <b>GGCCGTTATC</b> | <b>AAAAGACTAT</b> | <b>GCTAATATTA</b>  | <b>TCGGGGCCAC</b> | <b>AGGTATCACA</b> | 2792 |
| Catarrhini                  | <b>AGTAGTGACC</b> | <b>ACCCCGGTGC</b> | <b>CCCCCTTATC</b> | <b>CAAGAAAACC</b> | <b>ATTGATATAA</b>  | <b>TCGGAGCAAC</b> | <b>AGGAGTTTCC</b> | 2315 |
| Anolis_carolinensis         | -----             | -----             | -----             | -----             | -----              | -----             | -----             | -    |
| Murine_leukemia_virus       | <b>CGTGCTGACC</b> | <b>CAAAATCCTG</b> | <b>GACCCCTAAG</b> | <b>TGACAAGTCT</b> | <b>GCCTGGGTCC</b>  | <b>AAGGGGCTAC</b> | <b>TGGAG--GAA</b> | 2282 |
| Phascolarctos_cinereus      | <b>AGTATTGACC</b> | <b>AAGCCTATGG</b> | <b>GAAAGATGGG</b> | <b>ATCCAAACGG</b> | <b>ACAGTCGTGG</b>  | <b>CTGGGGCGAC</b> | <b>GGGCA--GCA</b> | 2188 |
| Estrildidae                 | -----             | -----             | -----             | -----             | -----              | -----             | -----             | -    |
| Xenopus_Silurana_tropicalis | -----             | -----             | -----             | -----             | -----              | -----             | -----             | -    |
| L_XT                        | <b>TNCTNNGCN</b>  | <b>CNACTTGTNG</b> | <b>CAGANACTNC</b> | <b>AGNNACANTN</b> | <b>TCAAANNNTNA</b> | <b>CANCANNTGC</b> | <b>AAACTNTTAT</b> | 2278 |
| Takifugu_rubripes           | -----             | -----             | -----             | -----             | -----              | -----             | -----             | -    |
| Bos_taurus                  | -----             | -----             | -----             | -----             | -----              | -----             | -----             | -    |
| Homo_sapiens                | -----             | -----             | -----             | -----             | -----              | -----             | -----             | -    |
| Microcebus_murinus          | -----             | -----             | -----             | -----             | -----              | -----             | -----             | -    |
| Myotis_lucifugus            | -----             | -----             | -----             | -----             | -----              | -----             | -----             | -    |
| Equus_caballus              | -----             | -----             | -----             | -----             | -----              | -----             | -----             | -    |
| Tupaia_belangeri            | -----             | -----             | -----             | -----             | -----              | -----             | -----             | -    |
| Loxodonta_africana          | -----             | -----             | -----             | -----             | -----              | -----             | -----             | -    |
| Murinae                     | -----             | -----             | -----             | -----             | -----              | -----             | -----             | -    |
| Canis_lupus_familiaris      | -----             | -----             | -----             | -----             | -----              | -----             | -----             | -    |
| Sus_scrofa                  | -----             | -----             | -----             | -----             | -----              | -----             | -----             | -    |
| Choloepus_hoffmanni         | -----             | -----             | -----             | -----             | -----              | -----             | -----             | -    |
| Vicugna_pacos               | -----             | -----             | -----             | -----             | -----              | -----             | -----             | -    |
| Gavialis_gangeticus         | -----             | -----             | -----             | -----             | -----              | -----             | -----             | -    |
| Mammalia                    | -----             | -----             | -----             | -----             | -----              | -----             | -----             | -    |
| Passeroidea                 | -----             | -----             | -----             | -----             | -----              | -----             | -----             | -    |
| Takifugu                    | -----             | -----             | -----             | -----             | -----              | -----             | -----             | -    |
| Pteropus_vampyrus           | -----             | -----             | -----             | -----             | -----              | -----             | -----             | -    |
| Ornithorhynchus             | -----             | -----             | -----             | -----             | -----              | -----             | -----             | -    |
| Oryctolagus_cuniculus       | -----             | -----             | -----             | -----             | -----              | -----             | -----             | -    |
| Gallus_gallus               | -----             | -----             | -----             | -----             | -----              | -----             | -----             | -    |
| Hominidae                   | -----             | -----             | -----             | -----             | -----              | -----             | -----             | -    |
| Metatheria                  | -----             | -----             | -----             | -----             | -----              | -----             | -----             | -    |
| Rodentia                    | -----             | -----             | -----             | -----             | -----              | -----             | -----             | -    |
| Monodelphis                 | -----             | -----             | -----             | -----             | -----              | -----             | -----             | -    |
| Consensus                   | -----             | -----             | -----             | -----             | -----              | -----             | -----             | -    |
| Conservation                | 100%              | -----             | -----             | -----             | -----              | -----             | -----             | 0%   |

|                             | 2,820      | 2,840      | 2,860      |            |            |            |            |      |
|-----------------------------|------------|------------|------------|------------|------------|------------|------------|------|
| Dipodomys_ordii             | -          | -          | -          | -          |            |            |            |      |
| Laurasiatheria              | -          | -          | -          | -          |            |            |            |      |
| Eutheria                    | -          | -          | -          | -          |            |            |            |      |
| Tarsius_syrichta            | -          | -          | -          | -          |            |            |            |      |
| Muridae                     | -          | -          | -          | -          |            |            |            |      |
| Gasterosteus_aculeatus      | -          | -          | -          | -          |            |            |            |      |
| Felis_silvestris            | -          | -          | -          | -          |            |            |            |      |
| Rattus                      | -          | -          | -          | -          |            |            |            |      |
| Papio_hamadryas             | TGTGTGTAGT | CAGGTACTTT | ATTTTTGTTC | TGCTTTAAT  | CTCTGAGGTC | GGCCAACCTT | CGTAGGAGTG | 183  |
| Pan_troglodytes             | -          | -          | -          | -          | -          | -          | -          | -    |
| Ailuropoda_melanoleuca      | -          | -          | -          | -          | -          | -          | -          | -    |
| Cavia_porcellus             | -          | -          | -          | -          | -          | -          | -          | -    |
| Ictidomys_tridecemlineatus  | -          | -          | -          | -          | -          | -          | -          | -    |
| Canis                       | -          | -          | -          | -          | -          | -          | -          | -    |
| Felis_catus                 | -          | -          | -          | -          | -          | -          | -          | -    |
| Ochotona_princeps           | -          | -          | -          | -          | -          | -          | -          | -    |
| Cercopithecidae             | -          | -          | -          | -          | -          | -          | -          | -    |
| Carnivora                   | -          | -          | -          | -          | -          | -          | -          | -    |
| Mus                         | -          | -          | -          | -          | -          | -          | -          | -    |
| Mus_musculus                | -          | -          | -          | -          | -          | -          | -          | -    |
| Rattus_norvegicus           | -          | -          | -          | -          | -          | -          | -          | -    |
| Tursiops_truncatus          | -          | -          | -          | -          | -          | -          | -          | -    |
| Procapra_capensis           | -          | -          | -          | -          | -          | -          | -          | -    |
| Primates                    | -          | -          | -          | -          | -          | -          | -          | -    |
| Echinops_telfairi           | -          | -          | -          | -          | -          | -          | -          | -    |
| Sorex_araneus               | -          | -          | -          | -          | -          | -          | -          | -    |
| Canidae                     | -          | -          | -          | -          | -          | -          | -          | -    |
| Otomur_garnettii            | -          | -          | -          | -          | -          | -          | -          | -    |
| Gallus                      | -          | -          | -          | -          | -          | -          | -          | -    |
| Callithrix_jacchus          | -          | -          | -          | -          | -          | -          | -          | -    |
| Crocodylus_porosus          | -          | -          | -          | -          | -          | -          | -          | -    |
| Erinaceus_europaeus         | -          | -          | -          | -          | -          | -          | -          | -    |
| rnd-6_family-7426-LTR-ERV1  | -          | -          | -          | -          | -          | -          | -          | -    |
| Esox_lucius                 | -          | -          | -          | -          | -          | -          | -          | -    |
| Salmo_salar                 | -          | -          | -          | -          | -          | -          | -          | -    |
| Didelphidae                 | -          | -          | -          | -          | -          | -          | -          | -    |
| Latimeria_chalumnae         | -          | -          | -          | -          | -          | -          | -          | -    |
| Monodelphis_domestica       | -          | -          | -          | -          | -          | -          | -          | -    |
| Macropus_eugenii            | -          | -          | -          | -          | -          | -          | -          | -    |
| Alligator_mississippiensis  | -          | -          | -          | -          | -          | -          | -          | -    |
| Chrysemys_picta_bellii      | -          | -          | -          | -          | -          | -          | -          | -    |
| Danio_rerio                 | -          | -          | -          | -          | -          | -          | -          | -    |
| Taeniopygia                 | -          | -          | -          | -          | -          | -          | -          | -    |
| Dasyus_novemcinctus         | -          | -          | -          | -          | -          | -          | -          | -    |
| LTR_XT                      | -          | -          | -          | -          | -          | -          | -          | -    |
| Haplorrhini                 | GAAGAGACAC | CTTTTTTCAA | ATCAAAGAGA | TGTATGATTG | GAGACCAAGA | AGTCCAACAC | AAGTTCTTAT | 2862 |
| Catarrhini                  | ACTAAGCAGG | CTTCTGTCT  | ACCACGGACC | TGCTCGGTGG | GGGGACGTGA | GATAGTTTAC | CAGTTCTTGT | 2385 |
| Anolis_carolinensis         | -          | -          | -          | -          | -          | -          | -          | -    |
| Murine_leukemia_virus       | AGCGGTATCG | CTGGACCACG | GATCGCAAAG | T-ACATCTAG | CTACCGGTAA | GGTCACCCAC | TCITTTCTCC | 2351 |
| Phascolarctos_cinereus      | AAGTTTACC  | TTGGACCACC | AAGAGACTTT | TGAAAATTGG | ACAAAAGCAA | G-TGACCCAC | TCATTCTTGG | 2257 |
| Estrildidae                 | -          | -          | -          | -          | -          | -          | -          | -    |
| Xenopus_Silurana_tropicalis | -          | -          | -          | -          | -          | -          | -          | -    |
| LTR_XT                      | TCAAANATTG | ANATNGANAN | NANNTNTTTT | AGGNTAGNAG | TGNNCNANGT | ATGTCNATAT | AAAANGGCAT | 2348 |
| Takifugu_rubripes           | -          | -          | -          | -          | -          | -          | -          | -    |
| Bos_taurus                  | -          | -          | -          | -          | -          | -          | -          | -    |
| Homo_sapiens                | -          | -          | -          | -          | -          | -          | -          | -    |
| Microcebus_murinus          | -          | -          | -          | -          | -          | -          | -          | -    |
| Myotis_lucifugus            | -          | -          | -          | -          | -          | -          | -          | -    |
| Equus_caballus              | -          | -          | -          | -          | -          | -          | -          | -    |
| Tupaia_belangeri            | -          | -          | -          | -          | -          | -          | -          | -    |
| Loxodonta_africana          | -          | -          | -          | -          | -          | -          | -          | -    |
| Murinae                     | -          | -          | -          | -          | -          | -          | -          | -    |
| Canis_lupus_familiaris      | -          | -          | -          | -          | -          | -          | -          | -    |
| Sus_scrofa                  | -          | -          | -          | -          | -          | -          | -          | -    |
| Choloepus_hoffmanni         | -          | -          | -          | -          | -          | -          | -          | -    |
| Vicugna_pacos               | -          | -          | -          | -          | -          | -          | -          | -    |
| Gavialis_gangeticus         | -          | -          | -          | -          | -          | -          | -          | -    |
| Mammalia                    | -          | -          | -          | -          | -          | -          | -          | -    |
| Passeroidea                 | -          | -          | -          | -          | -          | -          | -          | -    |
| Takifugu                    | -          | -          | -          | -          | -          | -          | -          | -    |
| Pteropus_vampyrus           | -          | -          | -          | -          | -          | -          | -          | -    |
| Ornithorhynchus             | -          | -          | -          | -          | -          | -          | -          | -    |
| Oryctolagus_cuniculus       | -          | -          | -          | -          | -          | -          | -          | -    |
| Gallus_gallus               | -          | -          | -          | -          | -          | -          | -          | -    |
| Hominidae                   | -          | -          | -          | -          | -          | -          | -          | -    |
| Metatheria                  | -          | -          | -          | -          | -          | -          | -          | -    |
| Rodentia                    | -          | -          | -          | -          | -          | -          | -          | -    |
| Monodelphis                 | -          | -          | -          | -          | -          | -          | -          | -    |
| Consensus                   | -          | -          | -          | -          | -          | -          | -          | -    |
| Conservation                | 100%       |            |            |            |            |            |            | 0%   |

|                             | 2,880             | 2,900             | 2,920             | 2,940             |                   |                   |                   |      |
|-----------------------------|-------------------|-------------------|-------------------|-------------------|-------------------|-------------------|-------------------|------|
| Dipodomys_ordii             | -----             | -----             | -----             | -----             | -                 |                   |                   |      |
| Laurasiatheria              | -----             | -----             | -----             | -----             | -                 |                   |                   |      |
| Eutheria                    | -----             | -----             | -----             | -----             | -                 |                   |                   |      |
| Tarsius_syrichta            | -----             | -----             | -----             | -----             | -                 |                   |                   |      |
| Muridae                     | -----             | -----             | -----             | -----             | -                 |                   |                   |      |
| Gasterosteus_aculeatus      | -----             | -----             | -----             | -----             | -                 |                   |                   |      |
| Felis_silvestris            | -----             | -----             | -----             | -----             | -                 |                   |                   |      |
| Rattus                      | -----             | -----             | -----             | -----             | -                 |                   |                   |      |
| Papio_hamadryas             | <b>TAGAGGGAGG</b> | <b>ACAGACGTGT</b> | <b>CCTGGACCCT</b> | <b>CACACTCCGA</b> | <b>CCCCGGGGGA</b> | <b>CGCCCCGGCG</b> | <b>GTCGTCTGGA</b> | 253  |
| Pan_troglodytes             | -----             | -----             | -----             | -----             | -                 |                   |                   |      |
| Ailuropoda_melanoleuca      | -----             | -----             | -----             | -----             | -                 |                   |                   |      |
| Cavia_porcellus             | -----             | -----             | -----             | -----             | -                 |                   |                   |      |
| Ictidomys_tridecemlineatus  | -----             | -----             | -----             | -----             | -                 |                   |                   |      |
| Canis                       | -----             | -----             | -----             | -----             | -                 |                   |                   |      |
| Felis_catus                 | -----             | -----             | -----             | -----             | -                 |                   |                   |      |
| Ochotona_princeps           | -----             | -----             | -----             | -----             | -                 |                   |                   |      |
| Cercopithecidae             | -----             | -----             | -----             | -----             | -                 |                   |                   |      |
| Carnivora                   | -----             | -----             | -----             | -----             | -                 |                   |                   |      |
| Mus                         | -----             | -----             | -----             | -----             | -                 |                   |                   |      |
| Mus_musculus                | -----             | -----             | -----             | -----             | -                 |                   |                   |      |
| Rattus_norvegicus           | -----             | -----             | -----             | -----             | -                 |                   |                   |      |
| Tursiops_truncatus          | -----             | -----             | -----             | -----             | -                 |                   |                   |      |
| Procapra_capensis           | -----             | -----             | -----             | -----             | -                 |                   |                   |      |
| Primates                    | -----             | -----             | -----             | -----             | -                 |                   |                   |      |
| Echinops_telfairi           | -----             | -----             | -----             | -----             | -                 |                   |                   |      |
| Sorex_araneus               | -----             | -----             | -----             | -----             | -                 |                   |                   |      |
| Canidae                     | -----             | -----             | -----             | -----             | -                 |                   |                   |      |
| Otomur_garnettii            | -----             | -----             | -----             | -----             | -                 |                   |                   |      |
| Gallus                      | -----             | -----             | -----             | -----             | -                 |                   |                   |      |
| Callithrix_jacchus          | -----             | -----             | -----             | -----             | -                 |                   |                   |      |
| Crocodylus_porosus          | -----             | -----             | -----             | -----             | -                 |                   |                   |      |
| Erinaceus_europaeus         | -----             | -----             | -----             | -----             | -                 |                   |                   |      |
| rnd-6_family-7426-LTR-ERV1  | -----             | -----             | -----             | -----             | -                 |                   |                   |      |
| Esox_lucius                 | -----             | -----             | -----             | -----             | -                 |                   |                   |      |
| Salmo_salar                 | -----             | -----             | -----             | -----             | -                 |                   |                   |      |
| Didelphidae                 | -----             | -----             | -----             | -----             | -                 |                   |                   |      |
| Latimeria_chalumnae         | -----             | -----             | -----             | -----             | -                 |                   |                   |      |
| Monodelphis_domestica       | -----             | -----             | -----             | -----             | -                 |                   |                   |      |
| Macropus_eugenii            | -----             | -----             | -----             | -----             | -                 |                   |                   |      |
| Alligator_mississippiensis  | -----             | -----             | -----             | -----             | -                 |                   |                   |      |
| Chrysemys_picta_bellii      | -----             | -----             | -----             | -----             | -                 |                   |                   |      |
| Danio_rerio                 | -----             | -----             | -----             | -----             | -                 |                   |                   |      |
| Taeniopygia                 | -----             | -----             | -----             | -----             | -                 |                   |                   |      |
| Dasyus_novemcinctus         | -----             | -----             | -----             | -----             | -                 |                   |                   |      |
| LTR_XT                      | -----             | -----             | -----             | -----             | -                 |                   |                   |      |
| Haplorrhini                 | <b>ACTTGCCAAA</b> | <b>CTGCCAGTG</b>  | <b>CCGCTGTTGG</b> | <b>GAAGAGACTT</b> | <b>GCTGCAGAAG</b> | <b>CTGCAGGCTC</b> | <b>AGATCTCCTT</b> | 2932 |
| Catarrhini                  | <b>ACATGCCTGA</b> | <b>CTGTCCCTTG</b> | <b>CCCTTGCTGG</b> | <b>GAAGAGACTT</b> | <b>GCTTAGCAAG</b> | <b>CTGAGAGCCA</b> | <b>CCATCTCCTT</b> | 2455 |
| Anolis_carolinensis         | -----             | -----             | -----             | -----             | -                 |                   |                   |      |
| Murine_leukemia_virus       | <b>ATGTACCAGA</b> | <b>CTGCCCTAT</b>  | <b>CCTCTGCTAG</b> | <b>GAAGAGACTT</b> | <b>GCTGACTAAA</b> | <b>CTAAAAGCCC</b> | <b>AGATCCACTT</b> | 2421 |
| Phascolarctos_cinereus      | <b>TCATACCCGA</b> | <b>ATGCCCTGCT</b> | <b>CCCCGTGTAG</b> | <b>GCAGGGACCT</b> | <b>CCTCACCAAG</b> | <b>CTAAAAGCTC</b> | <b>AAATCCAGTT</b> | 2327 |
| Estrildidae                 | -----             | -----             | -----             | -----             | -                 |                   |                   |      |
| Xenopus_Silurana_tropicalis | -----             | -----             | -----             | -----             | -                 |                   |                   |      |
| LTR_XT                      | <b>TGACTAGNAT</b> | <b>CANCANTNTG</b> | <b>ACTNCTNANG</b> | <b>ACTACTCCAA</b> | <b>GGTTTGTACA</b> | <b>NNNCNNCCNC</b> | <b>GTTNTNTCAT</b> | 2418 |
| Takifugu_rubripes           | -----             | -----             | -----             | -----             | -                 |                   |                   |      |
| Bos_taurus                  | -----             | -----             | -----             | -----             | -                 |                   |                   |      |
| Homo_sapiens                | -----             | -----             | -----             | -----             | -                 |                   |                   |      |
| Microcebus_murinus          | -----             | -----             | -----             | -----             | -                 |                   |                   |      |
| Myotis_lucifugus            | -----             | -----             | -----             | -----             | -                 |                   |                   |      |
| Equus_caballus              | -----             | -----             | -----             | -----             | -                 |                   |                   |      |
| Tupaia_belangeri            | -----             | -----             | -----             | -----             | -                 |                   |                   |      |
| Loxodonta_africana          | -----             | -----             | -----             | -----             | -                 |                   |                   |      |
| Murinae                     | -----             | -----             | -----             | -----             | -                 |                   |                   |      |
| Canis_lupus_familiaris      | -----             | -----             | -----             | -----             | -                 |                   |                   |      |
| Sus_scrofa                  | -----             | -----             | -----             | -----             | -                 |                   |                   |      |
| Choloepus_hoffmanni         | -----             | -----             | -----             | -----             | -                 |                   |                   |      |
| Vicugna_pacos               | -----             | -----             | -----             | -----             | -                 |                   |                   |      |
| Gavialis_gangeticus         | -----             | -----             | -----             | -----             | -                 |                   |                   |      |
| Mammalia                    | -----             | -----             | -----             | -----             | -                 |                   |                   |      |
| Passeroidea                 | -----             | -----             | -----             | -----             | -                 |                   |                   |      |
| Takifugu                    | -----             | -----             | -----             | -----             | -                 |                   |                   |      |
| Pteropus_vampyrus           | -----             | -----             | -----             | -----             | -                 |                   |                   |      |
| Ornithorhynchus             | -----             | -----             | -----             | -----             | -                 |                   |                   |      |
| Oryctolagus_cuniculus       | -----             | -----             | -----             | -----             | -                 |                   |                   |      |
| Gallus_gallus               | -----             | -----             | -----             | -----             | -                 |                   |                   |      |
| Hominidae                   | -----             | -----             | -----             | -----             | -                 |                   |                   |      |
| Metatheria                  | -----             | -----             | -----             | -----             | -                 |                   |                   |      |
| Rodentia                    | -----             | -----             | -----             | -----             | -                 |                   |                   |      |
| Monodelphis                 | -----             | -----             | -----             | -----             | -                 |                   |                   |      |
| Consensus                   | -----             | -----             | -----             | -----             | -                 |                   |                   |      |
| Conservation                | 100%              | -----             | -----             | -----             | -----             | -----             | -----             | 0%   |

|                             | 2,960      | 2,980      | 3,000        |                                                        |                             |
|-----------------------------|------------|------------|--------------|--------------------------------------------------------|-----------------------------|
| Dipodomys_ordii             |            |            |              |                                                        |                             |
| Laurasiatheria              |            |            |              |                                                        |                             |
| Eutheria                    |            |            |              |                                                        |                             |
| Tarsius_syrichtha           |            |            |              |                                                        |                             |
| Muridae                     |            |            |              |                                                        |                             |
| Gasterosteus_aculeatus      |            |            |              |                                                        |                             |
| Felis_silvestris            |            |            |              |                                                        |                             |
| Rattus                      |            |            |              |                                                        |                             |
| Papio_hamadryas             | GGAAGGCTGA | TGACACCGTC | AGCCTCCTCA   | AATCTGAAGG CAGGTTCCCC CTGCCATCTG AATCACTTGT 323        |                             |
| Pan_troglodytes             |            |            |              |                                                        |                             |
| Ailuropoda_melanoleuca      |            |            |              |                                                        |                             |
| Cavia_porcellus             |            |            |              |                                                        |                             |
| Ictidomys_tridecemlineatus  |            |            |              |                                                        |                             |
| Canis                       |            |            |              |                                                        |                             |
| Felis_catus                 |            |            |              |                                                        |                             |
| Ochotona_princeps           |            |            |              |                                                        |                             |
| Cercopithecidae             |            |            |              |                                                        |                             |
| Carnivora                   |            |            |              |                                                        |                             |
| Mus                         |            |            |              |                                                        |                             |
| Mus_musculus                |            |            |              |                                                        |                             |
| Rattus_norvegicus           |            |            |              |                                                        |                             |
| Tursiops_truncatus          |            |            |              |                                                        |                             |
| Procapra_capensis           |            |            |              |                                                        |                             |
| Primates                    |            |            |              |                                                        |                             |
| Echinops_telfairi           |            |            |              |                                                        |                             |
| Sorex_araneus               |            |            |              |                                                        |                             |
| Canidae                     |            |            |              |                                                        |                             |
| Otomomys_garnettii          |            |            |              |                                                        |                             |
| Gallus                      |            |            |              |                                                        |                             |
| Callithrix_jacchus          |            |            |              |                                                        |                             |
| Crocodylus_porosus          |            |            |              |                                                        |                             |
| Erinaceus_europaeus         |            |            |              |                                                        |                             |
| rnd-6_family-7426-LTR-ERV1  |            |            |              |                                                        |                             |
| Esox_lucius                 |            |            |              |                                                        |                             |
| Salmo_salar                 |            |            |              |                                                        |                             |
| Didelphidae                 |            |            |              |                                                        |                             |
| Latimeria_chalumnae         |            |            |              |                                                        |                             |
| Monodelphis_domestica       |            |            |              |                                                        |                             |
| Macropus_eugenii            |            |            |              |                                                        |                             |
| Alligator_mississippiensis  |            |            |              |                                                        |                             |
| Chrysemys_picta_bellii      |            |            |              |                                                        |                             |
| Danio_rerio                 |            |            |              |                                                        |                             |
| Taeniopygia                 |            |            |              |                                                        |                             |
| Dasyus_novemcinctus         |            |            |              |                                                        |                             |
| LTR_XT                      |            |            |              |                                                        |                             |
| Haplorrhini                 | CACACCGAGT | GGAGATATGA | CCTTGAGCCT   | AGGGCAAAAA AAGGCTATGG TACTAACNCT CACAGTNCCC 3002       |                             |
| Catarrhini                  | TACAAAACAG | GGCTCTTTAC | AGCTAAAGTT   | ACCGGGAACA GGAGTTATCA TG - - GCCCT TACGGTCCCC 2522     |                             |
| Anolis_carolinensis         |            |            |              |                                                        |                             |
| Murine_leukemia_virus       | CGAGGGATCG | GGAGCTCAGG | TTGTGGGACC   | AATGGGACAG CCCCTGCAAG TGCTGA - CCC TAAA - - - - C 2485 |                             |
| Phascolarctos_cinereus      | TTCCACAGAG | GGCCACAGG  | TAACATGG - - | - GAAGACCG CCCCGCCATG TGTTTAGTCC TGAA - - - - C 2388   |                             |
| Estrildidae                 |            |            |              |                                                        |                             |
| Xenopus_Silurana_tropicalis |            |            |              |                                                        |                             |
| L_XT                        | ATCNCNCTGG | CAGANATNCT | AGNANNGTTN   | TCAAGNCNAG AATGCTTNT                                   | ACAAATATGTN GACGACNTNC 2488 |
| Takifugu_rubripes           |            |            |              |                                                        |                             |
| Bos_taurus                  |            |            |              |                                                        |                             |
| Homo_sapiens                |            |            |              |                                                        |                             |
| Microcebus_murinus          |            |            |              |                                                        |                             |
| Myotis_lucifugus            |            |            |              |                                                        |                             |
| Equus_caballus              |            |            |              |                                                        |                             |
| Tupaia_belangeri            |            |            |              |                                                        |                             |
| Loxodonta_africana          |            |            |              |                                                        |                             |
| Murinae                     |            |            |              |                                                        |                             |
| Canis_lupus_familiaris      |            |            |              |                                                        |                             |
| Sus_scrofa                  |            |            |              |                                                        |                             |
| Choloepus_hoffmanni         |            |            |              |                                                        |                             |
| Vicugna_pacos               |            |            |              |                                                        |                             |
| Gavialis_gangeticus         |            |            |              |                                                        |                             |
| Mammalia                    |            |            |              |                                                        |                             |
| Passeroidea                 |            |            |              |                                                        |                             |
| Takifugu                    |            |            |              |                                                        |                             |
| Pteropus_vampyrus           |            |            |              |                                                        |                             |
| Ornithorhynchus             |            |            |              |                                                        |                             |
| Oryctolagus_cuniculus       |            |            |              |                                                        |                             |
| Gallus_gallus               |            |            |              |                                                        |                             |
| Hominidae                   |            |            |              |                                                        |                             |
| Metatheria                  |            |            |              |                                                        |                             |
| Rodentia                    |            |            |              |                                                        |                             |
| Monodelphis                 |            |            |              |                                                        |                             |
| Consensus                   |            |            |              |                                                        |                             |
| Conservation                | 100%       |            |              |                                                        |                             |
|                             | 0%         |            |              |                                                        |                             |

|                             | 3,020             | 3,040             | 3,060             | 3,080             |                   |                   |                   |      |
|-----------------------------|-------------------|-------------------|-------------------|-------------------|-------------------|-------------------|-------------------|------|
| Dipodomys_ordii             | -----             | -----             | -----             | -----             | -                 |                   |                   |      |
| Laurasiatheria              | -----             | -----             | -----             | -----             | -                 |                   |                   |      |
| Eutheria                    | -----             | -----             | -----             | -----             | -                 |                   |                   |      |
| Tarsius_syrichta            | -----             | -----             | -----             | -----             | -                 |                   |                   |      |
| Muridae                     | -----             | -----             | -----             | -----             | -                 |                   |                   |      |
| Gasterosteus_aculeatus      | -----             | -----             | -----             | -----             | -                 |                   |                   |      |
| Felis_silvestris            | -----             | -----             | -----             | -----             | -                 |                   |                   |      |
| Rattus                      | -----             | -----             | -----             | -----             | -                 |                   |                   |      |
| Papio_hamadryas             | <b>AGTACTTTGG</b> | <b>CGCCATTCTC</b> | <b>TGGCCGCGCG</b> | <b>GCTCATCTGT</b> | <b>TTTTGTCTGG</b> | <b>TTTGTGTTGT</b> | <b>TACTGTTGTC</b> | 393  |
| Pan_troglodytes             | -----             | -----             | -----             | -----             | -                 |                   |                   |      |
| Ailuropoda_melanoleuca      | -----             | -----             | -----             | -----             | -                 |                   |                   |      |
| Cavia_porcellus             | -----             | -----             | -----             | -----             | -                 |                   |                   |      |
| Ictidomys_tridecemlineatus  | -----             | -----             | -----             | -----             | -                 |                   |                   |      |
| Canis                       | -----             | -----             | -----             | -----             | -                 |                   |                   |      |
| Felis_catus                 | -----             | -----             | -----             | -----             | -                 |                   |                   |      |
| Ochotona_princeps           | -----             | -----             | -----             | -----             | -                 |                   |                   |      |
| Cercopithecidae             | -----             | -----             | -----             | -----             | -                 |                   |                   |      |
| Carnivora                   | -----             | -----             | -----             | -----             | -                 |                   |                   |      |
| Mus                         | -----             | -----             | -----             | -----             | -                 |                   |                   |      |
| Mus_musculus                | -----             | -----             | -----             | -----             | -                 |                   |                   |      |
| Rattus_norvegicus           | -----             | -----             | -----             | -----             | -                 |                   |                   |      |
| Tursiops_truncatus          | -----             | -----             | -----             | -----             | -                 |                   |                   |      |
| Procyon_capensis            | -----             | -----             | -----             | -----             | -                 |                   |                   |      |
| Primates                    | -----             | -----             | -----             | -----             | -                 |                   |                   |      |
| Echinops_telfairi           | -----             | -----             | -----             | -----             | -                 |                   |                   |      |
| Sorex_araneus               | -----             | -----             | -----             | -----             | -                 |                   |                   |      |
| Canidae                     | -----             | -----             | -----             | -----             | -                 |                   |                   |      |
| Otomur_garnettii            | -----             | -----             | -----             | -----             | -                 |                   |                   |      |
| Gallus                      | -----             | -----             | -----             | -----             | -                 |                   |                   |      |
| Callithrix_jacchus          | -----             | -----             | -----             | -----             | -                 |                   |                   |      |
| Crocodylus_porosus          | -----             | -----             | -----             | -----             | -                 |                   |                   |      |
| Erinaceus_europaeus         | -----             | -----             | -----             | -----             | -                 |                   |                   |      |
| rnd-6_family-7426-LTR-ERV1  | -----             | -----             | -----             | -----             | -                 |                   |                   |      |
| Esox_lucius                 | -----             | -----             | -----             | -----             | -                 |                   |                   |      |
| Salmo_salar                 | -----             | -----             | -----             | -----             | -                 |                   |                   |      |
| Didelphidae                 | -----             | -----             | -----             | -----             | -                 |                   |                   |      |
| Latimeria_chalumnae         | -----             | -----             | -----             | -----             | -                 |                   |                   |      |
| Monodelphis_domestica       | -----             | -----             | -----             | -----             | -                 |                   |                   |      |
| Macropus_eugenii            | -----             | -----             | -----             | -----             | -                 |                   |                   |      |
| Alligator_mississippiensis  | -----             | -----             | -----             | -----             | -                 |                   |                   |      |
| Chrysemys_picta_bellii      | -----             | -----             | -----             | -----             | -                 |                   |                   |      |
| Danio_rerio                 | -----             | -----             | -----             | -----             | -                 |                   |                   |      |
| Taeniopygia                 | -----             | -----             | -----             | -----             | -                 |                   |                   |      |
| Dasyus_novemcinctus         | -----             | -----             | -----             | -----             | -                 |                   |                   |      |
| LTR_XT                      | -----             | -----             | -----             | -----             | -                 |                   |                   |      |
| Haplorrhini                 | <b>AAAGCAGAGG</b> | <b>AGTGGAGACT</b> | <b>TTATGAAAGT</b> | <b>AGTTGCCAGG</b> | <b>AGTGTGNANN</b> | <b>GGGNNNNANN</b> | <b>GNANNTNANA</b> | 3072 |
| Catarrhini                  | <b>CGGGAAGAAG</b> | <b>AATGGAGACT</b> | <b>TT-----</b>    | <b>-----TT</b>    | <b>CTAACCGAGC</b> | <b>CAGGCCAAGA</b> | <b>-----</b>      | 2566 |
| Anolis_carolinensis         | -----             | -----             | -----             | -----             | -----             | -----             | -----             | -    |
| Murine_leukemia_virus       | <b>ATAGAGGATG</b> | <b>AGTATCGGCT</b> | <b>ACA-----</b>   | <b>-----TG</b>    | <b>AGACCTCAAC</b> | <b>AGAGCCGGAT</b> | <b>-----</b>      | 2530 |
| Phascolarctos_cinereus      | <b>TTGGAGGAGG</b> | <b>AATACCGATT</b> | <b>ACA-----</b>   | <b>-----CG</b>    | <b>AAA----AGC</b> | <b>CGGTCCC--T</b> | <b>-----</b>      | 2427 |
| Estrildidae                 | -----             | -----             | -----             | -----             | -----             | -----             | -----             | -    |
| Xenopus_Silurana_tropicalis | -----             | -----             | -----             | -----             | -----             | -----             | -----             | -    |
| LTR_XT                      | <b>TGCTNCAAAC</b> | <b>AGTAGTTNAA</b> | <b>NAGGANCAAT</b> | <b>TGANTNTNTT</b> | <b>AGAAGAANTN</b> | <b>TTANATCTGA</b> | <b>TATANAACNN</b> | 2558 |
| Takifugu_rubripes           | -----             | -----             | -----             | -----             | -----             | -----             | -----             | -    |
| Bos_taurus                  | -----             | -----             | -----             | -----             | -----             | -----             | -----             | -    |
| Homo_sapiens                | -----             | -----             | -----             | -----             | -----             | -----             | -----             | -    |
| Microcebus_murinus          | -----             | -----             | -----             | -----             | -----             | -----             | -----             | -    |
| Myotis_lucifugus            | -----             | -----             | -----             | -----             | -----             | -----             | -----             | -    |
| Equus_caballus              | -----             | -----             | -----             | -----             | -----             | -----             | -----             | -    |
| Tupaia_belangeri            | -----             | -----             | -----             | -----             | -----             | -----             | -----             | -    |
| Loxodonta_africana          | -----             | -----             | -----             | -----             | -----             | -----             | -----             | -    |
| Murinae                     | -----             | -----             | -----             | -----             | -----             | -----             | -----             | -    |
| Canis_lupus_familiaris      | -----             | -----             | -----             | -----             | -----             | -----             | -----             | -    |
| Sus_scrofa                  | -----             | -----             | -----             | -----             | -----             | -----             | -----             | -    |
| Choloepus_hoffmanni         | -----             | -----             | -----             | -----             | -----             | -----             | -----             | -    |
| Vicugna_pacos               | -----             | -----             | -----             | -----             | -----             | -----             | -----             | -    |
| Gavialis_gangeticus         | -----             | -----             | -----             | -----             | -----             | -----             | -----             | -    |
| Mammalia                    | -----             | -----             | -----             | -----             | -----             | -----             | -----             | -    |
| Passeroidea                 | -----             | -----             | -----             | -----             | -----             | -----             | -----             | -    |
| Takifugu                    | -----             | -----             | -----             | -----             | -----             | -----             | -----             | -    |
| Pteropus_vampyrus           | -----             | -----             | -----             | -----             | -----             | -----             | -----             | -    |
| Ornithorhynchus             | -----             | -----             | -----             | -----             | -----             | -----             | -----             | -    |
| Oryctolagus_cuniculus       | -----             | -----             | -----             | -----             | -----             | -----             | -----             | -    |
| Gallus_gallus               | -----             | -----             | -----             | -----             | -----             | -----             | -----             | -    |
| Hominidae                   | -----             | -----             | -----             | -----             | -----             | -----             | -----             | -    |
| Metatheria                  | -----             | -----             | -----             | -----             | -----             | -----             | -----             | -    |
| Rodentia                    | -----             | -----             | -----             | -----             | -----             | -----             | -----             | -    |
| Monodelphis                 | -----             | -----             | -----             | -----             | -----             | -----             | -----             | -    |
| Consensus                   | -----             | -----             | -----             | -----             | -----             | -----             | -----             | -    |
| Conservation                | 100%              | -----             | -----             | -----             | -----             | -----             | -----             | 0%   |



|                             | 3,100             | 3,120                | 3,140             |                     |                   |                    |                   |      |
|-----------------------------|-------------------|----------------------|-------------------|---------------------|-------------------|--------------------|-------------------|------|
| Dipodomys_ordii             | -----             | -----                | -----             | -                   |                   |                    |                   |      |
| Laurasiatheria              | -----             | -----                | -----             | -                   |                   |                    |                   |      |
| Eutheria                    | -----             | -----                | -----             | -                   |                   |                    |                   |      |
| Tarsius_syrichta            | -----             | -----                | -----             | -                   |                   |                    |                   |      |
| Muridae                     | -----             | -----                | -----             | -                   |                   |                    |                   |      |
| Gasterosteus_aculeatus      | -----             | -----                | -----             | -                   |                   |                    |                   |      |
| Felis_silvestris            | -----             | -----                | -----             | -                   |                   |                    |                   |      |
| Rattus                      | -----             | -----                | -----             | -                   |                   |                    |                   |      |
| Papio_hamadryas             | <b>TTATTTATAT</b> | <b>GTGTGTATGA</b>    | <b>GCCTAAGGAC</b> | <b>GGGACAATGG</b>   | <b>GACAGACGCT</b> | <b>AACAACCTCCT</b> | <b>CTATCTTTGA</b> | 463  |
| Pan_troglodytes             | -----             | -----                | -----             | -----               | -----             | -----              | -----             | -    |
| Ailuropoda_melanoleuca      | -----             | -----                | -----             | -----               | -----             | -----              | -----             | -    |
| Cavia_porcellus             | -----             | -----                | -----             | -----               | -----             | -----              | -----             | -    |
| Ictidomys_tridecemlineatus  | -----             | -----                | -----             | -----               | -----             | -----              | -----             | -    |
| Canis                       | -----             | -----                | -----             | -----               | -----             | -----              | -----             | -    |
| Felis_catus                 | -----             | -----                | -----             | -----               | -----             | -----              | -----             | -    |
| Ochotona_princeps           | -----             | -----                | -----             | -----               | -----             | -----              | -----             | -    |
| Cercopithecidae             | -----             | -----                | -----             | -----               | -----             | -----              | -----             | -    |
| Carnivora                   | -----             | -----                | -----             | -----               | -----             | -----              | -----             | -    |
| Mus                         | -----             | -----                | -----             | -----               | -----             | -----              | -----             | -    |
| Mus_musculus                | -----             | -----                | -----             | -----               | -----             | -----              | -----             | -    |
| Rattus_norvegicus           | -----             | -----                | -----             | -----               | -----             | -----              | -----             | -    |
| Tursiops_truncatus          | -----             | -----                | -----             | -----               | -----             | -----              | -----             | -    |
| Procapra_capensis           | -----             | -----                | -----             | -----               | -----             | -----              | -----             | -    |
| Primates                    | -----             | -----                | -----             | -----               | -----             | -----              | -----             | -    |
| Echinops_telfairi           | -----             | -----                | -----             | -----               | -----             | -----              | -----             | -    |
| Sorex_araneus               | -----             | -----                | -----             | -----               | -----             | -----              | -----             | -    |
| Canidae                     | -----             | -----                | -----             | -----               | -----             | -----              | -----             | -    |
| Otomomys_garnettii          | -----             | -----                | -----             | -----               | -----             | -----              | -----             | -    |
| Gallus                      | -----             | -----                | -----             | -----               | -----             | -----              | -----             | -    |
| Callithrix_jacchus          | -----             | -----                | -----             | -----               | -----             | -----              | -----             | -    |
| Crocodylus_porosus          | -----             | -----                | -----             | -----               | -----             | -----              | -----             | -    |
| Erinaceus_europaeus         | -----             | -----                | -----             | -----               | -----             | -----              | -----             | -    |
| rnd-6_family-7426-LTR-ERV1  | -----             | -----                | -----             | -----               | -----             | -----              | -----             | -    |
| Esox_lucius                 | -----             | -----                | -----             | -----               | -----             | -----              | -----             | -    |
| Salmo_salar                 | -----             | -----                | -----             | -----               | -----             | -----              | -----             | -    |
| Didelphidae                 | -----             | -----                | -----             | -----               | -----             | -----              | -----             | -    |
| Latimeria_chalumnae         | -----             | -----                | -----             | -----               | -----             | -----              | -----             | -    |
| Monodelphis_domestica       | -----             | -----                | -----             | -----               | -----             | -----              | -----             | -    |
| Macropus_eugenii            | -----             | -----                | -----             | -----               | -----             | -----              | -----             | -    |
| Alligator_mississippiensis  | -----             | -----                | -----             | -----               | -----             | -----              | -----             | -    |
| Chrysemys_picta_bellii      | -----             | -----                | -----             | -----               | -----             | -----              | -----             | -    |
| Danio_rerio                 | -----             | -----                | -----             | -----               | -----             | -----              | -----             | -    |
| Taeniopygia                 | -----             | -----                | -----             | -----               | -----             | -----              | -----             | -    |
| Dasybus_novemcinctus        | -----             | -----                | -----             | -----               | -----             | -----              | -----             | -    |
| LTR_XT                      | -----             | -----                | -----             | -----               | -----             | -----              | -----             | -    |
| Haplorrhini                 | <b>GAGNANAANN</b> | <b>GTNNANANAN</b>    | <b>TTANTCNTTA</b> | <b>AGTTNCNNGN</b>   | <b>AGNNGNNGG</b>  | <b>NANNANANN</b>   | <b>CCCCAGGGCT</b> | 3142 |
| Catarrhini                  | <b>GATAAAACCA</b> | <b>GCTC - - TAG</b>  | <b>CTAAGCGATG</b> | <b>- - - GCCTCG</b> | <b>AGTATGGGCA</b> | <b>GAGGATAATC</b>  | <b>CTCCGGGACT</b> | 2629 |
| Anolis_carolinensis         | -----             | -----                | -----             | -----               | -----             | -----              | -----             | -    |
| Murine_leukemia_virus       | <b>GTTTCTCTAG</b> | <b>GGTC - - CACC</b> | <b>TGGCTTTCTG</b> | <b>ATTTTCCCA</b>    | <b>GGCCTGGGCG</b> | <b>GAAACCGGGG</b>  | <b>GCATGGGACT</b> | 2598 |
| Phascolarctos_cinereus      | <b>CCTTCTATCG</b> | <b>ACCC - - GTCA</b> | <b>TGGCTCCAAC</b> | <b>TCTTTCCCAT</b>   | <b>GGTTTGGGCC</b> | <b>GAGAAGGCAG</b>  | <b>GTATGGGACT</b> | 2495 |
| Estrildidae                 | -----             | -----                | -----             | -----               | -----             | -----              | -----             | -    |
| Xenopus_Silurana_tropicalis | -----             | -----                | -----             | -----               | -----             | -----              | -----             | -    |
| L_XT                        | <b>AGGCTTTAAA</b> | <b>TANNCNANAA</b>    | <b>ATGTNNNNTN</b> | <b>ANTTGAANN</b>    | <b>GNTGTCNAAT</b> | <b>TTCTTGNGGT</b>  | <b>CAACATAGGN</b> | 2628 |
| Takifugu_rubripes           | -----             | -----                | -----             | -----               | -----             | -----              | -----             | -    |
| Bos_taurus                  | -----             | -----                | -----             | -----               | -----             | -----              | -----             | -    |
| Homo_sapiens                | -----             | -----                | -----             | -----               | -----             | -----              | -----             | -    |
| Microcebus_murinus          | -----             | -----                | -----             | -----               | -----             | -----              | -----             | -    |
| Myotis_lucifugus            | -----             | -----                | -----             | -----               | -----             | -----              | -----             | -    |
| Equus_caballus              | -----             | -----                | -----             | -----               | -----             | -----              | -----             | -    |
| Tupaia_belangeri            | -----             | -----                | -----             | -----               | -----             | -----              | -----             | -    |
| Loxodonta_africana          | -----             | -----                | -----             | -----               | -----             | -----              | -----             | -    |
| Murinae                     | -----             | -----                | -----             | -----               | -----             | -----              | -----             | -    |
| Canis_lupus_familiaris      | -----             | -----                | -----             | -----               | -----             | -----              | -----             | -    |
| Sus_scrofa                  | -----             | -----                | -----             | -----               | -----             | -----              | -----             | -    |
| Choloepus_hoffmanni         | -----             | -----                | -----             | -----               | -----             | -----              | -----             | -    |
| Vicugna_pacos               | -----             | -----                | -----             | -----               | -----             | -----              | -----             | -    |
| Gavialis_gangeticus         | -----             | -----                | -----             | -----               | -----             | -----              | -----             | -    |
| Mammalia                    | -----             | -----                | -----             | -----               | -----             | -----              | -----             | -    |
| Passeroidea                 | -----             | -----                | -----             | -----               | -----             | -----              | -----             | -    |
| Takifugu                    | -----             | -----                | -----             | -----               | -----             | -----              | -----             | -    |
| Pteropus_vampyrus           | -----             | -----                | -----             | -----               | -----             | -----              | -----             | -    |
| Ornithorhynchus             | -----             | -----                | -----             | -----               | -----             | -----              | -----             | -    |
| Oryctolagus_cuniculus       | -----             | -----                | -----             | -----               | -----             | -----              | -----             | -    |
| Gallus_gallus               | -----             | -----                | -----             | -----               | -----             | -----              | -----             | -    |
| Hominidae                   | -----             | -----                | -----             | -----               | -----             | -----              | -----             | -    |
| Metatheria                  | -----             | -----                | -----             | -----               | -----             | -----              | -----             | -    |
| Rodentia                    | -----             | -----                | -----             | -----               | -----             | -----              | -----             | -    |
| Monodelphis                 | -----             | -----                | -----             | -----               | -----             | -----              | -----             | -    |
| Consensus                   | -----             | -----                | -----             | -----               | -----             | -----              | -----             | -    |
| Conservation                | 100%              | -----                | -----             | -----               | -----             | -----              | -----             | 0%   |

|                             | 3,160              | 3,180             | 3,200             | 3,220             |                   |                   |                   |      |
|-----------------------------|--------------------|-------------------|-------------------|-------------------|-------------------|-------------------|-------------------|------|
| Dipodomys_ordii             | -----              | -----             | -----             | -----             | -                 |                   |                   |      |
| Laurasiatheria              | -----              | -----             | -----             | -----             | -                 |                   |                   |      |
| Eutheria                    | -----              | -----             | -----             | -----             | -                 |                   |                   |      |
| Tarsius_syrichta            | -----              | -----             | -----             | -----             | -                 |                   |                   |      |
| Muridae                     | -----              | -----             | -----             | -----             | -                 |                   |                   |      |
| Gasterosteus_aculeatus      | -----              | -----             | -----             | -----             | -                 |                   |                   |      |
| Felis_silvestris            | -----              | -----             | -----             | -----             | -                 |                   |                   |      |
| Rattus                      | -----              | -----             | -----             | -----             | -                 |                   |                   |      |
| Papio_hamadryas             | <b>CTTTGACGCA</b>  | <b>CTTTTCAGAC</b> | <b>GTCCGGGCCA</b> | <b>GAGCCCCAAA</b> | <b>TCTTTCCGTA</b> | <b>GGAGTCCGAA</b> | <b>AAGGACGATG</b> | 533  |
| Pan_troglodytes             | -----              | -----             | -----             | -----             | -                 |                   |                   |      |
| Ailuropoda_melanoleuca      | -----              | -----             | -----             | -----             | -                 |                   |                   |      |
| Cavia_porcellus             | -----              | -----             | -----             | -----             | -                 |                   |                   |      |
| Ictidomys_tridecemlineatus  | -----              | -----             | -----             | -----             | -                 |                   |                   |      |
| Canis                       | -----              | -----             | -----             | -----             | -                 |                   |                   |      |
| Felis_catus                 | -----              | -----             | -----             | -----             | -                 |                   |                   |      |
| Ochotona_princeps           | -----              | -----             | -----             | -----             | -                 |                   |                   |      |
| Cercopithecidae             | -----              | -----             | -----             | -----             | -                 |                   |                   |      |
| Carnivora                   | -----              | -----             | -----             | -----             | -                 |                   |                   |      |
| Mus                         | -----              | -----             | -----             | -----             | -                 |                   |                   |      |
| Mus_musculus                | -----              | -----             | -----             | -----             | -                 |                   |                   |      |
| Rattus_norvegicus           | -----              | -----             | -----             | -----             | -                 |                   |                   |      |
| Tursiops_truncatus          | -----              | -----             | -----             | -----             | -                 |                   |                   |      |
| Procapra_capensis           | -----              | -----             | -----             | -----             | -                 |                   |                   |      |
| Primates                    | -----              | -----             | -----             | -----             | -                 |                   |                   |      |
| Echinops_telfairi           | -----              | -----             | -----             | -----             | -                 |                   |                   |      |
| Sorex_araneus               | -----              | -----             | -----             | -----             | -                 |                   |                   |      |
| Canidae                     | -----              | -----             | -----             | -----             | -                 |                   |                   |      |
| Otomur_garnettii            | -----              | -----             | -----             | -----             | -                 |                   |                   |      |
| Gallus                      | -----              | -----             | -----             | -----             | -                 |                   |                   |      |
| Callithrix_jacchus          | -----              | -----             | -----             | -----             | -                 |                   |                   |      |
| Crocodylus_porosus          | -----              | -----             | -----             | -----             | -                 |                   |                   |      |
| Erinaceus_europaeus         | -----              | -----             | -----             | -----             | -                 |                   |                   |      |
| rnd-6_family-7426-LTR-ERV1  | -----              | -----             | -----             | -----             | -                 |                   |                   |      |
| Esox_lucius                 | -----              | -----             | -----             | -----             | -                 |                   |                   |      |
| Salmo_salar                 | -----              | -----             | -----             | -----             | -                 |                   |                   |      |
| Didelphidae                 | -----              | -----             | -----             | -----             | -                 |                   |                   |      |
| Latimeria_chalumnae         | -----              | -----             | -----             | -----             | -                 |                   |                   |      |
| Monodelphis_domestica       | -----              | -----             | -----             | -----             | -                 |                   |                   |      |
| Macropus_eugenii            | -----              | -----             | -----             | -----             | -                 |                   |                   |      |
| Alligator_mississippiensis  | -----              | -----             | -----             | -----             | -                 |                   |                   |      |
| Chrysemys_picta_bellii      | -----              | -----             | -----             | -----             | -                 |                   |                   |      |
| Danio_rerio                 | -----              | -----             | -----             | -----             | -                 |                   |                   |      |
| Taeniopygia                 | -----              | -----             | -----             | -----             | -                 |                   |                   |      |
| Dasyus_novemcinctus         | -----              | -----             | -----             | -----             | -                 |                   |                   |      |
| LTR_XT                      | -----              | -----             | -----             | -----             | -                 |                   |                   |      |
| Haplorrhini                 | <b>AGCAGTGANN</b>  | <b>CNNNNNCCTG</b> | <b>NNNTANNAGA</b> | <b>GCTACTACGA</b> | <b>GGAACCTANN</b> | <b>NNNTGCNNAT</b> | <b>NNNTCAGTAN</b> | 3212 |
| Catarrhini                  | <b>GGCGGTCAAC</b>  | <b>CAAGCCCCCG</b> | <b>TACTCATAGA</b> | <b>AGTTAAGCCT</b> | <b>GGGGCCCAAC</b> | <b>CAATTAGACA</b> | <b>AAAGCAGTAT</b> | 2699 |
| Anolis_carolinensis         | -----              | -----             | -----             | -----             | -                 |                   |                   |      |
| Murine_leukemia_virus       | <b>GGCAGTTCGC</b>  | <b>CAAGCGCCTC</b> | <b>TGATTATACC</b> | <b>TCTGAAGGCA</b> | <b>ACCTCCACCC</b> | <b>CCGTGTCCAT</b> | <b>AAAACAATAC</b> | 2668 |
| Phascolarctos_cinereus      | <b>GGCCAAATCAA</b> | <b>GTCCCACCAG</b> | <b>TGGTAGTGGG</b> | <b>ACTGAAGTCA</b> | <b>GATGCCTCAC</b> | <b>CAGTGGCTGT</b> | <b>TCGACAGTAC</b> | 2565 |
| Estrildidae                 | -----              | -----             | -----             | -----             | -                 |                   |                   |      |
| Xenopus_Silurana_tropicalis | -----              | -----             | -----             | -----             | -                 |                   |                   |      |
| LTR_XT                      | <b>CCAGGTTNTA</b>  | <b>GGATTCCNNT</b> | <b>ANANGACAGA</b> | <b>ANNTANNNTA</b> | <b>TNTCTAAANT</b> | <b>CNNAGTNCNA</b> | <b>ACNTCNCAAA</b> | 2698 |
| Takifugu_rubripes           | -----              | -----             | -----             | -----             | -                 |                   |                   |      |
| Bos_taurus                  | -----              | -----             | -----             | -----             | -                 |                   |                   |      |
| Homo_sapiens                | -----              | -----             | -----             | -----             | -                 |                   |                   |      |
| Microcebus_murinus          | -----              | -----             | -----             | -----             | -                 |                   |                   |      |
| Myotis_lucifugus            | -----              | -----             | -----             | -----             | -                 |                   |                   |      |
| Equus_caballus              | -----              | -----             | -----             | -----             | -                 |                   |                   |      |
| Tupaia_belangeri            | -----              | -----             | -----             | -----             | -                 |                   |                   |      |
| Loxodonta_africana          | -----              | -----             | -----             | -----             | -                 |                   |                   |      |
| Murinae                     | -----              | -----             | -----             | -----             | -                 |                   |                   |      |
| Canis_lupus_familiaris      | -----              | -----             | -----             | -----             | -                 |                   |                   |      |
| Sus_scrofa                  | -----              | -----             | -----             | -----             | -                 |                   |                   |      |
| Choloepus_hoffmanni         | -----              | -----             | -----             | -----             | -                 |                   |                   |      |
| Vicugna_pacos               | -----              | -----             | -----             | -----             | -                 |                   |                   |      |
| Gavialis_gangeticus         | -----              | -----             | -----             | -----             | -                 |                   |                   |      |
| Mammalia                    | -----              | -----             | -----             | -----             | -                 |                   |                   |      |
| Passeroidea                 | -----              | -----             | -----             | -----             | -                 |                   |                   |      |
| Takifugu                    | -----              | -----             | -----             | -----             | -                 |                   |                   |      |
| Pteropus_vampyrus           | -----              | -----             | -----             | -----             | -                 |                   |                   |      |
| Ornithorhynchus             | -----              | -----             | -----             | -----             | -                 |                   |                   |      |
| Oryctolagus_cuniculus       | -----              | -----             | -----             | -----             | -                 |                   |                   |      |
| Gallus_gallus               | -----              | -----             | -----             | -----             | -                 |                   |                   |      |
| Hominidae                   | -----              | -----             | -----             | -----             | -                 |                   |                   |      |
| Metatheria                  | -----              | -----             | -----             | -----             | -                 |                   |                   |      |
| Rodentia                    | -----              | -----             | -----             | -----             | -                 |                   |                   |      |
| Monodelphis                 | -----              | -----             | -----             | -----             | -                 |                   |                   |      |
| Consensus                   | -----              | -----             | -----             | -----             | -                 |                   |                   |      |
| Conservation                | 100%               | -----             | -----             | -----             | -----             | -----             | -----             | 0%   |

|                             | 3,240             | 3,260             | 3,280             |                    |                   |                   |                    |      |
|-----------------------------|-------------------|-------------------|-------------------|--------------------|-------------------|-------------------|--------------------|------|
| Dipodomys_ordii             | -                 | -                 | -                 | -                  |                   |                   |                    |      |
| Laurasiatheria              | -                 | -                 | -                 | -                  |                   |                   |                    |      |
| Eutheria                    | -                 | -                 | -                 | -                  |                   |                   |                    |      |
| Tarsius_syrichta            | -                 | -                 | -                 | -                  |                   |                   |                    |      |
| Muridae                     | -                 | -                 | -                 | -                  |                   |                   |                    |      |
| Gasterosteus_aculeatus      | -                 | -                 | -                 | -                  |                   |                   |                    |      |
| Felis_silvestris            | -                 | -                 | -                 | -                  |                   |                   |                    |      |
| Rattus                      | -                 | -                 | -                 | -                  |                   |                   |                    |      |
| Papio_hamadryas             | <b>GCAAACCTTC</b> | <b>TGCTCGTCCG</b> | <b>AGTGGCCCAC</b> | <b>CCTTCATGTC</b>  | <b>GGGTGGCCCC</b> | <b>GGGACGGAAC</b> | <b>TTTTGACCTC</b>  | 603  |
| Pan_troglodytes             | -                 | -                 | -                 | -                  | -                 | -                 | -                  | -    |
| Ailuropoda_melanoleuca      | -                 | -                 | -                 | -                  | -                 | -                 | -                  | -    |
| Cavia_porcellus             | -                 | -                 | -                 | -                  | -                 | -                 | -                  | -    |
| Ictidomys_tridecemlineatus  | -                 | -                 | -                 | -                  | -                 | -                 | -                  | -    |
| Canis                       | -                 | -                 | -                 | -                  | -                 | -                 | -                  | -    |
| Felis_catus                 | -                 | -                 | -                 | -                  | -                 | -                 | -                  | -    |
| Ochotona_princeps           | -                 | -                 | -                 | -                  | -                 | -                 | -                  | -    |
| Cercopithecidae             | -                 | -                 | -                 | -                  | -                 | -                 | -                  | -    |
| Carnivora                   | -                 | -                 | -                 | -                  | -                 | -                 | -                  | -    |
| Mus                         | -                 | -                 | -                 | -                  | -                 | -                 | -                  | -    |
| Mus_musculus                | -                 | -                 | -                 | -                  | -                 | -                 | -                  | -    |
| Rattus_norvegicus           | -                 | -                 | -                 | -                  | -                 | -                 | -                  | -    |
| Tursiops_truncatus          | -                 | -                 | -                 | -                  | -                 | -                 | -                  | -    |
| Procyonidae                 | -                 | -                 | -                 | -                  | -                 | -                 | -                  | -    |
| Primates                    | -                 | -                 | -                 | -                  | -                 | -                 | -                  | -    |
| Echinops_telfairi           | -                 | -                 | -                 | -                  | -                 | -                 | -                  | -    |
| Sorex_araneus               | -                 | -                 | -                 | -                  | -                 | -                 | -                  | -    |
| Canidae                     | -                 | -                 | -                 | -                  | -                 | -                 | -                  | -    |
| Otomomys_garnettii          | -                 | -                 | -                 | -                  | -                 | -                 | -                  | -    |
| Gallus                      | -                 | -                 | -                 | -                  | -                 | -                 | -                  | -    |
| Callithrix_jacchus          | -                 | -                 | -                 | -                  | -                 | -                 | -                  | -    |
| Crocodylus_porosus          | -                 | -                 | -                 | -                  | -                 | -                 | -                  | -    |
| Erinaceus_europaeus         | -                 | -                 | -                 | -                  | -                 | -                 | -                  | -    |
| rnd-6_family-7426-LTR-ERV1  | -                 | -                 | -                 | -                  | -                 | -                 | -                  | -    |
| Esox_lucius                 | -                 | -                 | -                 | -                  | -                 | -                 | -                  | -    |
| Salmo_salar                 | -                 | -                 | -                 | -                  | -                 | -                 | -                  | -    |
| Didelphidae                 | -                 | -                 | -                 | -                  | -                 | -                 | -                  | -    |
| Latimeria_chalumnae         | -                 | -                 | -                 | -                  | -                 | -                 | -                  | -    |
| Monodelphis_domestica       | -                 | -                 | -                 | -                  | -                 | -                 | -                  | -    |
| Macropus_eugenii            | -                 | -                 | -                 | -                  | -                 | -                 | -                  | -    |
| Alligator_mississippiensis  | -                 | -                 | -                 | -                  | -                 | -                 | -                  | -    |
| Chrysemys_picta_bellii      | -                 | -                 | -                 | -                  | -                 | -                 | -                  | -    |
| Danio_rerio                 | -                 | -                 | -                 | -                  | -                 | -                 | -                  | -    |
| Taeniopygia                 | -                 | -                 | -                 | -                  | -                 | -                 | -                  | -    |
| Dasybus_novemcinctus        | -                 | -                 | -                 | -                  | -                 | -                 | -                  | -    |
| LTR_XT                      | -                 | -                 | -                 | -                  | -                 | -                 | -                  | -    |
| Haplorrhini                 | <b>NCNATNCCCA</b> | <b>NAGAGGCTTA</b> | <b>NCNNGGATT</b>  | <b>NCAAANCNNT</b>  | <b>TNANATGGCT</b> | <b>CCTTGANNNT</b> | <b>GGAATAANAG</b>  | 3282 |
| Catarrhini                  | <b>CGGTTCCCA</b>  | <b>GAGAAGCTCT</b> | <b>CGAAGGAATC</b> | <b>CAGGTTTCATC</b> | <b>TCAGGCGCTT</b> | <b>GAAAGCCTAT</b> | <b>GGAATTATAG</b>  | 2769 |
| Anolis_carolinensis         | -                 | -                 | -                 | -                  | -                 | -                 | -                  | -    |
| Murine_leukemia_virus       | <b>CCCATGTGCG</b> | <b>ANGAAGCCAG</b> | <b>ACTGGGGATC</b> | <b>AAGCCCCACA</b>  | <b>TACAGAGGCT</b> | <b>GTGGACCAG</b>  | <b>GGAATATTGG</b>  | 2738 |
| Phascolarctos_cinereus      | <b>CCAATGAGCA</b> | <b>AGGAAGCCCG</b> | <b>GGAGGGTATC</b> | <b>AGCCCCACA</b>   | <b>TCCAAAGATT</b> | <b>CTGGATTG</b>   | <b>GGGATTCTGG</b>  | 2635 |
| Estrildidae                 | -                 | -                 | -                 | -                  | -                 | -                 | -                  | -    |
| Xenopus_Silurana_tropicalis | -                 | -                 | -                 | -                  | -                 | -                 | -                  | -    |
| L_XT                        | <b>NGGCCCTAAG</b> | <b>ATCATTNNGG</b> | <b>GGANTAGNAA</b> | <b>ATTAATCTAG</b>  | <b>NGAGTTNATA</b> | <b>AANTNCTTTG</b> | <b>NINGANAAAGC</b> | 2768 |
| Takifugu_rubripes           | -                 | -                 | -                 | -                  | -                 | -                 | -                  | -    |
| Bos_taurus                  | -                 | -                 | -                 | -                  | -                 | -                 | -                  | -    |
| Homo_sapiens                | -                 | -                 | -                 | -                  | -                 | -                 | -                  | -    |
| Microcebus_murinus          | -                 | -                 | -                 | -                  | -                 | -                 | -                  | -    |
| Myotis_lucifugus            | -                 | -                 | -                 | -                  | -                 | -                 | -                  | -    |
| Equus_caballus              | -                 | -                 | -                 | -                  | -                 | -                 | -                  | -    |
| Tupaia_belangeri            | -                 | -                 | -                 | -                  | -                 | -                 | -                  | -    |
| Loxodonta_africana          | -                 | -                 | -                 | -                  | -                 | -                 | -                  | -    |
| Murinae                     | -                 | -                 | -                 | -                  | -                 | -                 | -                  | -    |
| Canis_lupus_familiaris      | -                 | -                 | -                 | -                  | -                 | -                 | -                  | -    |
| Sus_scrofa                  | -                 | -                 | -                 | -                  | -                 | -                 | -                  | -    |
| Choloepus_hoffmanni         | -                 | -                 | -                 | -                  | -                 | -                 | -                  | -    |
| Vicugna_pacos               | -                 | -                 | -                 | -                  | -                 | -                 | -                  | -    |
| Gavialis_gangeticus         | -                 | -                 | -                 | -                  | -                 | -                 | -                  | -    |
| Mammalia                    | -                 | -                 | -                 | -                  | -                 | -                 | -                  | -    |
| Passeroidea                 | -                 | -                 | -                 | -                  | -                 | -                 | -                  | -    |
| Takifugu                    | -                 | -                 | -                 | -                  | -                 | -                 | -                  | -    |
| Pteropus_vampyrus           | -                 | -                 | -                 | -                  | -                 | -                 | -                  | -    |
| Ornithorhynchus             | -                 | -                 | -                 | -                  | -                 | -                 | -                  | -    |
| Oryctolagus_cuniculus       | -                 | -                 | -                 | -                  | -                 | -                 | -                  | -    |
| Gallus_gallus               | -                 | -                 | -                 | -                  | -                 | -                 | -                  | -    |
| Hominidae                   | -                 | -                 | -                 | -                  | -                 | -                 | -                  | -    |
| Metatheria                  | -                 | -                 | -                 | -                  | -                 | -                 | -                  | -    |
| Rodentia                    | -                 | -                 | -                 | -                  | -                 | -                 | -                  | -    |
| Monodelphis                 | -                 | -                 | -                 | -                  | -                 | -                 | -                  | -    |
| Consensus                   | -                 | -                 | -                 | -                  | -                 | -                 | -                  | -    |
| Conservation                | 100%              | 0%                |                   |                    |                   |                   |                    |      |

|                             | 3,300             | 3,320             | 3,340             | 3,360             |                   |                       |                   |      |
|-----------------------------|-------------------|-------------------|-------------------|-------------------|-------------------|-----------------------|-------------------|------|
| Dipodomys_ordii             | -----             | -----             | -----             | -----             | -                 |                       |                   |      |
| Laurasiatheria              | -----             | -----             | -----             | -----             | -                 |                       |                   |      |
| Eutheria                    | -----             | -----             | -----             | -----             | -                 |                       |                   |      |
| Tarsius_syrichta            | -----             | -----             | -----             | -----             | -                 |                       |                   |      |
| Muridae                     | -----             | -----             | -----             | -----             | -                 |                       |                   |      |
| Gasterosteus_aculeatus      | -----             | -----             | -----             | -----             | -                 |                       |                   |      |
| Felis_silvestris            | -----             | -----             | -----             | -----             | -                 |                       |                   |      |
| Rattus                      | -----             | -----             | -----             | -----             | -                 |                       |                   |      |
| Papio_hamadryas             | <b>TCCGTTATTT</b> | <b>TGCAGGTTAA</b> | <b>GACAAAGGTA</b> | <b>ATGGATCCTG</b> | <b>GGCCGCATGG</b> | <b>TCACCCGGAC</b>     | <b>CAAGTGGCCT</b> | 673  |
| Pan_troglodytes             | -----             | -----             | -----             | -----             | -                 |                       |                   |      |
| Ailuropoda_melanoleuca      | -----             | -----             | -----             | -----             | -                 |                       |                   |      |
| Cavia_porcellus             | -----             | -----             | -----             | -----             | -                 |                       |                   |      |
| Ictidomys_tridecemlineatus  | -----             | -----             | -----             | -----             | -                 |                       |                   |      |
| Canis                       | -----             | -----             | -----             | -----             | -                 |                       |                   |      |
| Felis_catus                 | -----             | -----             | -----             | -----             | -                 |                       |                   |      |
| Ochotona_princeps           | -----             | -----             | -----             | -----             | -                 |                       |                   |      |
| Cercopithecidae             | -----             | -----             | -----             | -----             | -                 |                       |                   |      |
| Carnivora                   | -----             | -----             | -----             | -----             | -                 |                       |                   |      |
| Mus                         | -----             | -----             | -----             | -----             | -                 |                       |                   |      |
| Mus_musculus                | -----             | -----             | -----             | -----             | -                 |                       |                   |      |
| Rattus_norvegicus           | -----             | -----             | -----             | -----             | -                 |                       |                   |      |
| Tursiops_truncatus          | -----             | -----             | -----             | -----             | -                 |                       |                   |      |
| Procapra_capensis           | -----             | -----             | -----             | -----             | -                 |                       |                   |      |
| Primates                    | -----             | -----             | -----             | -----             | -                 |                       |                   |      |
| Echinops_telfairi           | -----             | -----             | -----             | -----             | -                 |                       |                   |      |
| Sorex_araneus               | -----             | -----             | -----             | -----             | -                 |                       |                   |      |
| Canidae                     | -----             | -----             | -----             | -----             | -                 |                       |                   |      |
| Otomur_garnettii            | -----             | -----             | -----             | -----             | -                 |                       |                   |      |
| Gallus                      | -----             | -----             | -----             | -----             | -                 |                       |                   |      |
| Callithrix_jacchus          | -----             | -----             | -----             | -----             | -                 |                       |                   |      |
| Crocodylus_porosus          | -----             | -----             | -----             | -----             | -                 |                       |                   |      |
| Erinaceus_europaeus         | -----             | -----             | -----             | -----             | -                 |                       |                   |      |
| rnd-6_family-7426-LTR-ERV1  | -----             | -----             | -----             | -----             | -                 |                       |                   |      |
| Esox_lucius                 | -----             | -----             | -----             | -----             | -                 |                       |                   |      |
| Salmo_salar                 | -----             | -----             | -----             | -----             | -                 |                       |                   |      |
| Didelphidae                 | -----             | -----             | -----             | -----             | -                 |                       |                   |      |
| Latimeria_chalumnae         | -----             | -----             | -----             | -----             | -                 |                       |                   |      |
| Monodelphis_domestica       | -----             | -----             | -----             | -----             | -                 |                       |                   |      |
| Macropus_eugenii            | -----             | -----             | -----             | -----             | -                 |                       |                   |      |
| Alligator_mississippiensis  | -----             | -----             | -----             | -----             | -                 |                       |                   |      |
| Chrysemys_picta_bellii      | -----             | -----             | -----             | -----             | -                 |                       |                   |      |
| Danio_rerio                 | -----             | -----             | -----             | -----             | -                 |                       |                   |      |
| Taeniopygia                 | -----             | -----             | -----             | -----             | -                 |                       |                   |      |
| Dasyus_novemcinctus         | -----             | -----             | -----             | -----             | -                 |                       |                   |      |
| LTR_XT                      | -----             | -----             | -----             | -----             | -                 |                       |                   |      |
| Haplorrhini                 | <b>NGAGNTNTNN</b> | <b>CTNCNCATGG</b> | <b>AATACTNCCC</b> | <b>TANNGCNGNT</b> | <b>GTNAANNCNN</b> | <b>NNNGNT - - - G</b> | <b>ANNANCANNN</b> | 3349 |
| Catarrhini                  | <b>TTCTTGCCA</b>  | <b>GTCTCCGGG</b>  | <b>AACACCCCC</b>  | <b>TCCTGCCTGT</b> | <b>CGCTAAGCCA</b> | <b>GGGACCAAGG</b>     | <b>ACTACCGGCC</b> | 2839 |
| Anolis_carolinensis         | -----             | -----             | -----             | -----             | -                 |                       |                   |      |
| Murine_leukemia_virus       | <b>TACCCTGCCA</b> | <b>GTCCCCCTGG</b> | <b>AACACGCCCC</b> | <b>TGCTGCCCGT</b> | <b>TAAGAAACCA</b> | <b>GGGACTAATG</b>     | <b>ATTACAGGCC</b> | 2808 |
| Phascolarctos_cinereus      | <b>TACCTTGCCA</b> | <b>GTCCGCCCTG</b> | <b>AACACCCCTT</b> | <b>TGTTACCTGT</b> | <b>AAAAAAACCT</b> | <b>GAACCAATG</b>      | <b>ACTATCGGCC</b> | 2705 |
| Estrildidae                 | -----             | -----             | -----             | -----             | -                 |                       |                   |      |
| Xenopus_Silurana_tropicalis | -----             | -----             | -----             | -----             | -                 |                       |                   |      |
| LTR_XT                      | <b>TAGACCTTTT</b> | <b>TATGNCTNC</b>  | <b>NANACNGNAG</b> | <b>TNAATACACC</b> | <b>TTTGGTCCCT</b> | <b>GNNGTCAAGN</b>     | <b>ACACTANNA</b>  | 2838 |
| Takifugu_rubripes           | -----             | -----             | -----             | -----             | -                 |                       |                   |      |
| Bos_taurus                  | -----             | -----             | -----             | -----             | -                 |                       |                   |      |
| Homo_sapiens                | -----             | -----             | -----             | -----             | -                 |                       |                   |      |
| Microcebus_murinus          | -----             | -----             | -----             | -----             | -                 |                       |                   |      |
| Myotis_lucifugus            | -----             | -----             | -----             | -----             | -                 |                       |                   |      |
| Equus_caballus              | -----             | -----             | -----             | -----             | -                 |                       |                   |      |
| Tupaia_belangeri            | -----             | -----             | -----             | -----             | -                 |                       |                   |      |
| Loxodonta_africana          | -----             | -----             | -----             | -----             | -                 |                       |                   |      |
| Murinae                     | -----             | -----             | -----             | -----             | -                 |                       |                   |      |
| Canis_lupus_familiaris      | -----             | -----             | -----             | -----             | -                 |                       |                   |      |
| Sus_scrofa                  | -----             | -----             | -----             | -----             | -                 |                       |                   |      |
| Choloepus_hoffmanni         | -----             | -----             | -----             | -----             | -                 |                       |                   |      |
| Vicugna_pacos               | -----             | -----             | -----             | -----             | -                 |                       |                   |      |
| Gavialis_gangeticus         | -----             | -----             | -----             | -----             | -                 |                       |                   |      |
| Mammalia                    | -----             | -----             | -----             | -----             | -                 |                       |                   |      |
| Passeroidea                 | -----             | -----             | -----             | -----             | -                 |                       |                   |      |
| Takifugu                    | -----             | -----             | -----             | -----             | -                 |                       |                   |      |
| Pteropus_vampyrus           | -----             | -----             | -----             | -----             | -                 |                       |                   |      |
| Ornithorhynchus             | -----             | -----             | -----             | -----             | -                 |                       |                   |      |
| Oryctolagus_cuniculus       | -----             | -----             | -----             | -----             | -                 |                       |                   |      |
| Gallus_gallus               | -----             | -----             | -----             | -----             | -                 |                       |                   |      |
| Hominidae                   | -----             | -----             | -----             | -----             | -                 |                       |                   |      |
| Metatheria                  | -----             | -----             | -----             | -----             | -                 |                       |                   |      |
| Rodentia                    | -----             | -----             | -----             | -----             | -                 |                       |                   |      |
| Monodelphis                 | -----             | -----             | -----             | -----             | -                 |                       |                   |      |
| Consensus                   | -----             | -----             | -----             | -----             | -                 |                       |                   |      |
| Conservation                | 100%              | -----             | -----             | -----             | -----             | -----                 | -----             | 0%   |

|                             | 3,380             | 3,400             | 3,420             |                   |                    |                   |                    |      |
|-----------------------------|-------------------|-------------------|-------------------|-------------------|--------------------|-------------------|--------------------|------|
| Dipodomys_ordii             | -----             | -----             | -----             | -                 |                    |                   |                    |      |
| Laurasiatheria              | -----             | -----             | -----             | -                 |                    |                   |                    |      |
| Eutheria                    | -----             | -----             | -----             | -                 |                    |                   |                    |      |
| Tarsius_syrichta            | -----             | -----             | -----             | -                 |                    |                   |                    |      |
| Muridae                     | -----             | -----             | -----             | -                 |                    |                   |                    |      |
| Gasterosteus_aculeatus      | -----             | -----             | -----             | -                 |                    |                   |                    |      |
| Felis_silvestris            | -----             | -----             | -----             | -                 |                    |                   |                    |      |
| Rattus                      | -----             | -----             | -----             | -                 |                    |                   |                    |      |
| Papio_hamadryas             | <b>ACATCATCAC</b> | <b>CTGGGAGGAT</b> | <b>CTCGTCCGAA</b> | <b>ATCCTCCGCC</b> | <b>TTGGGTGAAA</b>  | <b>CCCTTTCTCC</b> | <b>ATACCCCTTC</b>  | 743  |
| Pan_troglodytes             | -----             | -----             | -----             | -----             | -----              | -----             | -----              | -    |
| Ailuropoda_melanoleuca      | -----             | -----             | -----             | -----             | -----              | -----             | -----              | -    |
| Cavia_porcellus             | -----             | -----             | -----             | -----             | -----              | -----             | -----              | -    |
| Ictidomys_tridecemlineatus  | -----             | -----             | -----             | -----             | -----              | -----             | -----              | -    |
| Canis                       | -----             | -----             | -----             | -----             | -----              | -----             | -----              | -    |
| Felis_catus                 | -----             | -----             | -----             | -----             | -----              | -----             | -----              | -    |
| Ochotona_princeps           | -----             | -----             | -----             | -----             | -----              | -----             | -----              | -    |
| Cercopithecidae             | -----             | -----             | -----             | -----             | -----              | -----             | -----              | -    |
| Carnivora                   | -----             | -----             | -----             | -----             | -----              | -----             | -----              | -    |
| Mus                         | -----             | -----             | -----             | -----             | -----              | -----             | -----              | -    |
| Mus_musculus                | -----             | -----             | -----             | -----             | -----              | -----             | -----              | -    |
| Rattus_norvegicus           | -----             | -----             | -----             | -----             | -----              | -----             | -----              | -    |
| Tursiops_truncatus          | -----             | -----             | -----             | -----             | -----              | -----             | -----              | -    |
| Procapra_capensis           | -----             | -----             | -----             | -----             | -----              | -----             | -----              | -    |
| Primates                    | -----             | -----             | -----             | -----             | -----              | -----             | -----              | -    |
| Echinops_telfairi           | -----             | -----             | -----             | -----             | -----              | -----             | -----              | -    |
| Sorex_araneus               | -----             | -----             | -----             | -----             | -----              | -----             | -----              | -    |
| Canidae                     | -----             | -----             | -----             | -----             | -----              | -----             | -----              | -    |
| Otomur_garnettii            | -----             | -----             | -----             | -----             | -----              | -----             | -----              | -    |
| Gallus                      | -----             | -----             | -----             | -----             | -----              | -----             | -----              | -    |
| Callithrix_jacchus          | -----             | -----             | -----             | -----             | -----              | -----             | -----              | -    |
| Crocodylus_porosus          | -----             | -----             | -----             | -----             | -----              | -----             | -----              | -    |
| Erinaceus_europaeus         | -----             | -----             | -----             | -----             | -----              | -----             | -----              | -    |
| rnd-6_family-7426-LTR-ERV1  | -----             | -----             | -----             | -----             | -----              | -----             | -----              | -    |
| Esox_lucius                 | -----             | -----             | -----             | -----             | -----              | -----             | -----              | -    |
| Salmo_salar                 | -----             | -----             | -----             | -----             | -----              | -----             | -----              | -    |
| Didelphidae                 | -----             | -----             | -----             | -----             | -----              | -----             | -----              | -    |
| Latimeria_chalumnae         | -----             | -----             | -----             | -----             | -----              | -----             | -----              | -    |
| Monodelphis_domestica       | -----             | -----             | -----             | -----             | -----              | -----             | -----              | -    |
| Macropus_eugenii            | -----             | -----             | -----             | -----             | -----              | -----             | -----              | -    |
| Alligator_mississippiensis  | -----             | -----             | -----             | -----             | -----              | -----             | -----              | -    |
| Chrysemys_picta_bellii      | -----             | -----             | -----             | -----             | -----              | -----             | -----              | -    |
| Danio_rerio                 | -----             | -----             | -----             | -----             | -----              | -----             | -----              | -    |
| Taeniopygia                 | -----             | -----             | -----             | -----             | -----              | -----             | -----              | -    |
| Dasyus_novemcinctus         | -----             | -----             | -----             | -----             | -----              | -----             | -----              | -    |
| LTR_XT                      | -----             | -----             | -----             | -----             | -----              | -----             | -----              | -    |
| Haplorrhini                 | <b>NNTACAANAN</b> | <b>NTANGNNNNN</b> | <b>NCAANGANGT</b> | <b>NNNNNTNNTN</b> | <b>NTGNATNCNA</b>  | <b>NTGTNNNNNA</b> | <b>NNNNNTNNACT</b> | 3419 |
| Catarrhini                  | <b>AGTACAGGAC</b> | <b>TTGGCCTTGG</b> | <b>TCAACCAAGC</b> | <b>TACAGTGACT</b> | <b>CTGCACCCAA</b>  | <b>CAGTTCCTAA</b> | <b>CCCTTACACA</b>  | 2909 |
| Anolis_carolinensis         | -----             | -----             | -----             | -----             | -----              | -----             | -----              | -    |
| Murine_leukemia_virus       | <b>TGTCCAGGAT</b> | <b>CTGAGAGAAG</b> | <b>TCAACAAGCG</b> | <b>GGTGGAAGAC</b> | <b>ATCCACCCCA</b>  | <b>CCGTGCCCAA</b> | <b>CCCTTACAAC</b>  | 2878 |
| Phascolarctos_cinereus      | <b>AGTCCAAGAT</b> | <b>TTGAGGGAGG</b> | <b>TCAACAAAAG</b> | <b>AGTACAGGAC</b> | <b>ATTCATCCCA</b>  | <b>CAGTCCCGAA</b> | <b>CCCCTATAAC</b>  | 2775 |
| Estrildidae                 | -----             | -----             | -----             | -----             | -----              | -----             | -----              | -    |
| Xenopus_Silurana_tropicalis | -----             | -----             | -----             | -----             | -----              | -----             | -----              | -    |
| L_XT                        | <b>GCNTTNGNAN</b> | <b>CNCTTAAAN</b>  | <b>ANGACTTNCN</b> | <b>NGCNGNANNN</b> | <b>GCNACAAATNG</b> | <b>ACCCAANNGC</b> | <b>ACCNTTTGTN</b>  | 2908 |
| Takifugu_rubripes           | -----             | -----             | -----             | -----             | -----              | -----             | -----              | -    |
| Bos_taurus                  | -----             | -----             | -----             | -----             | -----              | -----             | -----              | -    |
| Homo_sapiens                | -----             | -----             | -----             | -----             | -----              | -----             | -----              | -    |
| Microcebus_murinus          | -----             | -----             | -----             | -----             | -----              | -----             | -----              | -    |
| Myotis_lucifugus            | -----             | -----             | -----             | -----             | -----              | -----             | -----              | -    |
| Equus_caballus              | -----             | -----             | -----             | -----             | -----              | -----             | -----              | -    |
| Tupaia_belangeri            | -----             | -----             | -----             | -----             | -----              | -----             | -----              | -    |
| Loxodonta_africana          | -----             | -----             | -----             | -----             | -----              | -----             | -----              | -    |
| Murinae                     | -----             | -----             | -----             | -----             | -----              | -----             | -----              | -    |
| Canis_lupus_familiaris      | -----             | -----             | -----             | -----             | -----              | -----             | -----              | -    |
| Sus_scrofa                  | -----             | -----             | -----             | -----             | -----              | -----             | -----              | -    |
| Choloepus_hoffmanni         | -----             | -----             | -----             | -----             | -----              | -----             | -----              | -    |
| Vicugna_pacos               | -----             | -----             | -----             | -----             | -----              | -----             | -----              | -    |
| Gavialis_gangeticus         | -----             | -----             | -----             | -----             | -----              | -----             | -----              | -    |
| Mammalia                    | -----             | -----             | -----             | -----             | -----              | -----             | -----              | -    |
| Passeroidea                 | -----             | -----             | -----             | -----             | -----              | -----             | -----              | -    |
| Takifugu                    | -----             | -----             | -----             | -----             | -----              | -----             | -----              | -    |
| Pteropus_vampyrus           | -----             | -----             | -----             | -----             | -----              | -----             | -----              | -    |
| Ornithorhynchus             | -----             | -----             | -----             | -----             | -----              | -----             | -----              | -    |
| Oryctolagus_cuniculus       | -----             | -----             | -----             | -----             | -----              | -----             | -----              | -    |
| Gallus_gallus               | -----             | -----             | -----             | -----             | -----              | -----             | -----              | -    |
| Hominidae                   | -----             | -----             | -----             | -----             | -----              | -----             | -----              | -    |
| Metatheria                  | -----             | -----             | -----             | -----             | -----              | -----             | -----              | -    |
| Rodentia                    | -----             | -----             | -----             | -----             | -----              | -----             | -----              | -    |
| Monodelphis                 | -----             | -----             | -----             | -----             | -----              | -----             | -----              | -    |
| Consensus                   | -----             | -----             | -----             | -----             | -----              | -----             | -----              | -    |
| Conservation                | 100%              | -----             | -----             | -----             | -----              | -----             | -----              | 0%   |

|                             | 3,440      | 3,460      | 3,480       | 3,500      |            |            |            |      |
|-----------------------------|------------|------------|-------------|------------|------------|------------|------------|------|
| Dipodomys_ordii             | -          | -          | -           | -          | -          |            |            |      |
| Laurasiatheria              | -          | -          | -           | -          | -          |            |            |      |
| Eutheria                    | -          | -          | -           | -          | -          |            |            |      |
| Tarsius_syrichta            | -          | -          | -           | -          | -          |            |            |      |
| Muridae                     | -          | -          | -           | -          | -          |            |            |      |
| Gasterosteus_aculeatus      | -          | -          | -           | -          | -          |            |            |      |
| Felis_silvestris            | -          | -          | -           | -          | -          |            |            |      |
| Rattus                      | -          | -          | -           | -          | -          |            |            |      |
| Papio_hamadryas             | TACATCCAAG | TCCACCCTCC | TTGCCCTAGA  | AGTCCCAAAG | AACCGGACCC | TGGATCCGCC | TAAACCCGTA | 813  |
| Pan_troglodytes             | -          | -          | -           | -          | -          | -          | -          | -    |
| Ailuropoda_melanoleuca      | -          | -          | -           | -          | -          | -          | -          | -    |
| Cavia_porcellus             | -          | -          | -           | -          | -          | -          | -          | -    |
| Ictidomys_tridecemlineatus  | -          | -          | -           | -          | -          | -          | -          | -    |
| Canis                       | -          | -          | -           | -          | -          | -          | -          | -    |
| Felis_catus                 | -          | -          | -           | -          | -          | -          | -          | -    |
| Ochotona_princeps           | -          | -          | -           | -          | -          | -          | -          | -    |
| Cercopithecidae             | -          | -          | -           | -          | -          | -          | -          | -    |
| Carnivora                   | -          | -          | -           | -          | -          | -          | -          | -    |
| Mus                         | -          | -          | -           | -          | -          | -          | -          | -    |
| Mus_musculus                | -          | -          | -           | -          | -          | -          | -          | -    |
| Rattus_norvegicus           | -          | -          | -           | -          | -          | -          | -          | -    |
| Tursiops_truncatus          | -          | -          | -           | -          | -          | -          | -          | -    |
| Procapra_capensis           | -          | -          | -           | -          | -          | -          | -          | -    |
| Primates                    | -          | -          | -           | -          | -          | -          | -          | -    |
| Echinops_telfairi           | -          | -          | -           | -          | -          | -          | -          | -    |
| Sorex_araneus               | -          | -          | -           | -          | -          | -          | -          | -    |
| Canidae                     | -          | -          | -           | -          | -          | -          | -          | -    |
| Otomomys_garnettii          | -          | -          | -           | -          | -          | -          | -          | -    |
| Gallus                      | -          | -          | -           | -          | -          | -          | -          | -    |
| Callithrix_jacchus          | -          | -          | -           | -          | -          | -          | -          | -    |
| Crocodylus_porosus          | -          | -          | -           | -          | -          | -          | -          | -    |
| Erinaceus_europaeus         | -          | -          | -           | -          | -          | -          | -          | -    |
| rnd-6_family-7426-LTR-ERV1  | -          | -          | -           | -          | -          | -          | -          | -    |
| Esox_lucius                 | -          | -          | -           | -          | -          | -          | -          | -    |
| Salmo_salar                 | -          | -          | -           | -          | -          | -          | -          | -    |
| Didelphidae                 | -          | -          | -           | -          | -          | -          | -          | -    |
| Latimeria_chalumnae         | -          | -          | -           | -          | -          | -          | -          | -    |
| Monodelphis_domestica       | -          | -          | -           | -          | -          | -          | -          | -    |
| Macropus_eugenii            | -          | -          | -           | -          | -          | -          | -          | -    |
| Alligator_mississippiensis  | -          | -          | -           | -          | -          | -          | -          | -    |
| Chrysemys_picta_bellii      | -          | -          | -           | -          | -          | -          | -          | -    |
| Danio_rerio                 | -          | -          | -           | -          | -          | -          | -          | -    |
| Taeniopygia                 | -          | -          | -           | -          | -          | -          | -          | -    |
| Dasyus_novemcinctus         | -          | -          | -           | -          | -          | -          | -          | -    |
| LTR_XT                      | -          | -          | -           | -          | -          | -          | -          | -    |
| Haplorrhini                 | NNNNTTGNNC | NNNNNNCTGC | NAGTNGCTGCT | TNNTNCAANN | NCNTNGACNN | NNNNNANNNN | NTNNTNNNNA | 3489 |
| Catarrhini                  | TTGTTAGGGC | TGCTGCCGGC | TGAGGACAGC  | TGGTTTACCT | GTCTGGACTT | AAAAGATGCC | TTCTTTAGCA | 2979 |
| Anolis_carolinensis         | -          | -          | -           | -          | -          | -          | -          | -    |
| Murine_leukemia_virus       | CTCTTAAGCG | GGCTCCCNCC | GTCCCAACAG  | TGGTACACTG | TGCTTGATTT | AAAGGATGCC | TTTTTCTGCC | 2948 |
| Phascolarctos_cinereus      | CTACTCAGTT | CCCTCCCGCC | CAGCCACACC  | TGGTATTGAG | TTTTAGACCT | CAAAGATGCT | TTCTTTTGCC | 2845 |
| Estrildidae                 | -          | -          | -           | -          | -          | -          | -          | -    |
| Xenopus_Silurana_tropicalis | -          | -          | -           | -          | -          | -          | -          | -    |
| LTR_XT                      | CTAGAGGTAC | ANACTANANN | TGGGACTATN  | CCAGCNGTNG | TNNNNCAATT | CANGGNTGTT | NAAATNAGTG | 2978 |
| Takifugu_rubripes           | -          | -          | -           | -          | -          | -          | -          | -    |
| Bos_taurus                  | -          | -          | -           | -          | -          | -          | -          | -    |
| Homo_sapiens                | -          | -          | -           | -          | -          | -          | -          | -    |
| Microcebus_murinus          | -          | -          | -           | -          | -          | -          | -          | -    |
| Myotis_lucifugus            | -          | -          | -           | -          | -          | -          | -          | -    |
| Equus_caballus              | -          | -          | -           | -          | -          | -          | -          | -    |
| Tupaia_belangeri            | -          | -          | -           | -          | -          | -          | -          | -    |
| Loxodonta_africana          | -          | -          | -           | -          | -          | -          | -          | -    |
| Murinae                     | -          | -          | -           | -          | -          | -          | -          | -    |
| Canis_lupus_familiaris      | -          | -          | -           | -          | -          | -          | -          | -    |
| Sus_scrofa                  | -          | -          | -           | -          | -          | -          | -          | -    |
| Choloepus_hoffmanni         | -          | -          | -           | -          | -          | -          | -          | -    |
| Vicugna_pacos               | -          | -          | -           | -          | -          | -          | -          | -    |
| Gavialis_gangeticus         | -          | -          | -           | -          | -          | -          | -          | -    |
| Mammalia                    | -          | -          | -           | -          | -          | -          | -          | -    |
| Passeroidea                 | -          | -          | -           | -          | -          | -          | -          | -    |
| Takifugu                    | -          | -          | -           | -          | -          | -          | -          | -    |
| Pteropus_vampyrus           | -          | -          | -           | -          | -          | -          | -          | -    |
| Ornithorhynchus             | -          | -          | -           | -          | -          | -          | -          | -    |
| Oryctolagus_cuniculus       | -          | -          | -           | -          | -          | -          | -          | -    |
| Gallus_gallus               | -          | -          | -           | -          | -          | -          | -          | -    |
| Hominidae                   | -          | -          | -           | -          | -          | -          | -          | -    |
| Metatheria                  | -          | -          | -           | -          | -          | -          | -          | -    |
| Rodentia                    | -          | -          | -           | -          | -          | -          | -          | -    |
| Monodelphis                 | -          | -          | -           | -          | -          | -          | -          | -    |
| Consensus                   | -          | -          | -           | -          | -          | -          | -          | -    |
| Conservation                | 100%       |            |             |            |            |            |            | 0%   |

|                             | 3,520      | 3,540      | 3,560      |            |            |            |            |      |
|-----------------------------|------------|------------|------------|------------|------------|------------|------------|------|
| Dipodomys_ordii             |            |            |            |            |            |            |            |      |
| Laurasiatheria              |            |            |            |            |            |            |            |      |
| Eutheria                    |            |            |            |            |            |            |            |      |
| Tarsius_syrichta            |            |            |            |            |            |            |            |      |
| Muridae                     |            |            |            |            |            |            |            |      |
| Gasterosteus_aculeatus      |            |            |            |            |            |            |            |      |
| Felis_silvestris            |            |            |            |            |            |            |            |      |
| Rattus                      |            |            |            |            |            |            |            |      |
| Papio_hamadryas             | CTCCCGGATG | AGTCGCAGCA | AGACCTCCTC | TTCCAAGACC | CTCTACCTCA | TCCACCACAT | AATCCCCTCC | 883  |
| Pan_troglodytes             |            |            |            |            |            |            |            |      |
| Ailuropoda_melanoleuca      |            |            |            |            |            |            |            |      |
| Cavia_porcellus             |            |            |            |            |            |            |            |      |
| Ictidomys_tridecemlineatus  |            |            |            |            |            |            |            |      |
| Canis                       |            |            |            |            |            |            |            |      |
| Felis_catus                 |            |            |            |            |            |            |            |      |
| Ochotona_princeps           |            |            |            |            |            |            |            |      |
| Cercopithecidae             |            |            |            |            |            |            |            |      |
| Carnivora                   |            |            |            |            |            |            |            |      |
| Mus                         |            |            |            |            |            |            |            |      |
| Mus_musculus                |            |            |            |            |            |            |            |      |
| Rattus_norvegicus           |            |            |            |            |            |            |            |      |
| Tursiops_truncatus          |            |            |            |            |            |            |            |      |
| Procapra_capensis           |            |            |            |            |            |            |            |      |
| Primates                    |            |            |            |            |            |            |            |      |
| Echinops_telfairi           |            |            |            |            |            |            |            |      |
| Sorex_araneus               |            |            |            |            |            |            |            |      |
| Canidae                     |            |            |            |            |            |            |            |      |
| Otomomys_garnettii          |            |            |            |            |            |            |            |      |
| Gallus                      |            |            |            |            |            |            |            |      |
| Callithrix_jacchus          |            |            |            |            |            |            |            |      |
| Crocodylus_porosus          |            |            |            |            |            |            |            |      |
| Erinaceus_europaeus         |            |            |            |            |            |            |            |      |
| rnd-6_family-7426-LTR-ERV1  |            |            |            |            |            |            |            |      |
| Esox_lucius                 |            |            |            |            |            |            |            |      |
| Salmo_salar                 |            |            |            |            |            |            |            |      |
| Didelphidae                 |            |            |            |            |            |            |            |      |
| Latimeria_chalumnae         |            |            |            |            |            |            |            |      |
| Monodelphis_domestica       |            |            |            |            |            |            |            |      |
| Macropus_eugenii            |            |            |            |            |            |            |            |      |
| Alligator_mississippiensis  |            |            |            |            |            |            |            |      |
| Chrysemys_picta_bellii      |            |            |            |            |            |            |            |      |
| Danio_rerio                 |            |            |            |            |            |            |            |      |
| Taeniopygia                 |            |            |            |            |            |            |            |      |
| Dasyus_novemcinctus         |            |            |            |            |            |            |            |      |
| LTR_XT                      |            |            |            |            |            |            |            |      |
| Haplorrhini                 | NNNGATTNNN | CCCTNTNNNC | NGNGACATNT | NNGNCTTTGA | NTGGNN     |            | CCNANN     | 3541 |
| Catarrhini                  | TCAGACTAGC | TCCTGAGAGC | CAGAAGCTGT | TTGCCTTTCA | GTGGGAAGAT | CCGGAGTCAG | GTGTCACTAC | 3049 |
| Anolis_carolinensis         |            |            |            |            |            |            |            |      |
| Murine_leukemia_virus       | TGAGACTCCA | CCCCACCAGT | CAGCCTCTCT | TCGCCTTTGA | GTGGAGAGAT | CCAGGGATGG | GAATCTCNGG | 3018 |
| Phascolarctos_cinereus      | TCAAGCTACA | CCCCAACAGC | CAGCCATTGT | TCGCCTTTGA | ATGGAGAGAT | CCAGAAAAAG | GCAATACTGG | 2915 |
| Estrildidae                 |            |            |            |            |            |            |            |      |
| Xenopus_Silurana_tropicalis |            |            |            |            |            |            |            |      |
| L_XT                        | GATGCCTAGA | NTTNTGTCCG | CANTAGAGAN | AAGATTCAAT | GCTTGTTTGC | GTTAACTTTT | AGNNGTCANC | 3048 |
| Takifugu_rubripes           |            |            |            |            |            |            |            |      |
| Bos_taurus                  |            |            |            |            |            |            |            |      |
| Homo_sapiens                |            |            |            |            |            |            |            |      |
| Microcebus_murinus          |            |            |            |            |            |            |            |      |
| Myotis_lucifugus            |            |            |            |            |            |            |            |      |
| Equus_caballus              |            |            |            |            |            |            |            |      |
| Tupaia_belangeri            |            |            |            |            |            |            |            |      |
| Loxodonta_africana          |            |            |            |            |            |            |            |      |
| Murinae                     |            |            |            |            |            |            |            |      |
| Canis_lupus_familiaris      |            |            |            |            |            |            |            |      |
| Sus_scrofa                  |            |            |            |            |            |            |            |      |
| Choloepus_hoffmanni         |            |            |            |            |            |            |            |      |
| Vicugna_pacos               |            |            |            |            |            |            |            |      |
| Gavialis_gangeticus         |            |            |            |            |            |            |            |      |
| Mammalia                    |            |            |            |            |            |            |            |      |
| Passeroidea                 |            |            |            |            |            |            |            |      |
| Takifugu                    |            |            |            |            |            |            |            |      |
| Pteropus_vampyrus           |            |            |            |            |            |            |            |      |
| Ornithorhynchus             |            |            |            |            |            |            |            |      |
| Oryctolagus_cuniculus       |            |            |            |            |            |            |            |      |
| Gallus_gallus               |            |            |            |            |            |            |            |      |
| Hominidae                   |            |            |            |            |            |            |            |      |
| Metatheria                  |            |            |            |            |            |            |            |      |
| Rodentia                    |            |            |            |            |            |            |            |      |
| Monodelphis                 |            |            |            |            |            |            |            |      |
| Consensus                   |            |            |            |            |            |            |            |      |
| Conservation                | 100%       |            |            |            |            |            |            | 0%   |

|                             | 3,580      | 3,600      | 3,620      | 3,640       |            |            |            |      |
|-----------------------------|------------|------------|------------|-------------|------------|------------|------------|------|
| Dipodomys_ordii             | -          | -          | -          | -           | -          |            |            |      |
| Laurasiatheria              | -          | -          | -          | -           | -          |            |            |      |
| Eutheria                    | -          | -          | -          | -           | -          |            |            |      |
| Tarsius_syricha             | -          | -          | -          | -           | -          |            |            |      |
| Muridae                     | -          | -          | -          | -           | -          |            |            |      |
| Gasterosteus_aculeatus      | -          | -          | -          | -           | -          |            |            |      |
| Felis_silvestris            | -          | -          | -          | -           | -          |            |            |      |
| Rattus                      | -          | -          | -          | -           | -          |            |            |      |
| Papio_hamadryas             | TGGAACCCC  | ACCCTACAAC | TCACCCTCGC | CCCCTGTCTT  | GTCCCCGTT  | TCTCCTACCA | CCCCTTCTGC | 953  |
| Pan_troglodytes             | -          | -          | -          | -           | -          | -          | -          | -    |
| Ailuropoda_melanoleuca      | -          | -          | -          | -           | -          | -          | -          | -    |
| Cavia_porcellus             | -          | -          | -          | -           | -          | -          | -          | -    |
| Ictidomys_tridecemlineatus  | -          | -          | -          | -           | -          | -          | -          | -    |
| Canis                       | -          | -          | -          | -           | -          | -          | -          | -    |
| Felis_catus                 | -          | -          | -          | -           | -          | -          | -          | -    |
| Ochotona_princeps           | -          | -          | -          | -           | -          | -          | -          | -    |
| Cercopithecidae             | -          | -          | -          | -           | -          | -          | -          | -    |
| Carnivora                   | -          | -          | -          | -           | -          | -          | -          | -    |
| Mus                         | -          | -          | -          | -           | -          | -          | -          | -    |
| Mus_musculus                | -          | -          | -          | -           | -          | -          | -          | -    |
| Rattus_norvegicus           | -          | -          | -          | -           | -          | -          | -          | -    |
| Tursiops_truncatus          | -          | -          | -          | -           | -          | -          | -          | -    |
| Procapra_capensis           | -          | -          | -          | -           | -          | -          | -          | -    |
| Primates                    | -          | -          | -          | -           | -          | -          | -          | -    |
| Echinops_telfairi           | -          | -          | -          | -           | -          | -          | -          | -    |
| Sorex_araneus               | -          | -          | -          | -           | -          | -          | -          | -    |
| Canidae                     | -          | -          | -          | -           | -          | -          | -          | -    |
| Otomur_garnettii            | -          | -          | -          | -           | -          | -          | -          | -    |
| Gallus                      | -          | -          | -          | -           | -          | -          | -          | -    |
| Callithrix_jacchus          | -          | -          | -          | -           | -          | -          | -          | -    |
| Crocodylus_porosus          | -          | -          | -          | -           | -          | -          | -          | -    |
| Erinaceus_europaeus         | -          | -          | -          | -           | -          | -          | -          | -    |
| rnd-6_family-7426-LTR-ERV1  | -          | -          | -          | -           | -          | -          | -          | -    |
| Esox_lucius                 | -          | -          | -          | -           | -          | -          | -          | -    |
| Salmo_salar                 | -          | -          | -          | -           | -          | -          | -          | -    |
| Didelphidae                 | -          | -          | -          | -           | -          | -          | -          | -    |
| Latimeria_chalumnae         | -          | -          | -          | -           | -          | -          | -          | -    |
| Monodelphis_domestica       | -          | -          | -          | -           | -          | -          | -          | -    |
| Macropus_eugenii            | -          | -          | -          | -           | -          | -          | -          | -    |
| Alligator_mississippiensis  | -          | -          | -          | -           | -          | -          | -          | -    |
| Chrysemys_picta_bellii      | -          | -          | -          | -           | -          | -          | -          | -    |
| Danio_rerio                 | -          | -          | -          | -           | -          | -          | -          | -    |
| Taeniopygia                 | -          | -          | -          | -           | -          | -          | -          | -    |
| Dasyus_novemcinctus         | -          | -          | -          | -           | -          | -          | -          | -    |
| LTR_XT                      | -          | -          | -          | -           | -          | -          | -          | -    |
| Haplorrhini                 | NCNNNNNANC | NGGACTNGAN | NNCCNNAANN | ATNTAANNNC  | TCNCCNNNNN | TCTNTNNNGN | NNCNCNNGNC | 3611 |
| Catarrhini                  | TCAGTACACT | TGGACCCGGC | TTCCCAAGG  | GTTTCGAGAAC | TGCCCTACTA | TCTTCGGGGA | GGCCCTGGCT | 3119 |
| Anolis_carolinensis         | -          | -          | -          | -           | -          | -          | -          | -    |
| Murine_leukemia_virus       | ACAATTGACC | TGGACCAGAC | TCCCACAGGG | TTTCAAAAAC  | AGTCCCACCC | TGTTTGATGA | GGCACTGCAC | 3088 |
| Phascolarctos_cinereus      | CCAGCTAACC | TGGACTCGGC | TACCGCAAGG | ATTCAAGAAC  | TCTCCCACCC | TCTTCGATGA | GGCCCTCCAC | 2985 |
| Estrildidae                 | -          | -          | -          | -           | -          | -          | -          | -    |
| Xenopus_Silurana_tropicalis | -          | -          | -          | -           | -          | -          | -          | -    |
| LTR_XT                      | TTTNTACNTG | CGNTCGACTA | NNTCATGGGA | TTTANNAACN  | CTCCCTGCAA | ACTCCACACA | CACCACTTAA | 3118 |
| Takifugu_rubripes           | -          | -          | -          | -           | -          | -          | -          | -    |
| Bos_taurus                  | -          | -          | -          | -           | -          | -          | -          | -    |
| Homo_sapiens                | -          | -          | -          | -           | -          | -          | -          | -    |
| Microcebus_murinus          | -          | -          | -          | -           | -          | -          | -          | -    |
| Myotis_lucifugus            | -          | -          | -          | -           | -          | -          | -          | -    |
| Equus_caballus              | -          | -          | -          | -           | -          | -          | -          | -    |
| Tupaia_belangeri            | -          | -          | -          | -           | -          | -          | -          | -    |
| Loxodonta_africana          | -          | -          | -          | -           | -          | -          | -          | -    |
| Murinae                     | -          | -          | -          | -           | -          | -          | -          | -    |
| Canis_lupus_familiaris      | -          | -          | -          | -           | -          | -          | -          | -    |
| Sus_scrofa                  | -          | -          | -          | -           | -          | -          | -          | -    |
| Choloepus_hoffmanni         | -          | -          | -          | -           | -          | -          | -          | -    |
| Vicugna_pacos               | -          | -          | -          | -           | -          | -          | -          | -    |
| Gavialis_gangeticus         | -          | -          | -          | -           | -          | -          | -          | -    |
| Mammalia                    | -          | -          | -          | -           | -          | -          | -          | -    |
| Passeroidea                 | -          | -          | -          | -           | -          | -          | -          | -    |
| Takifugu                    | -          | -          | -          | -           | -          | -          | -          | -    |
| Pteropus_vampyrus           | -          | -          | -          | -           | -          | -          | -          | -    |
| Ornithorhynchus             | -          | -          | -          | -           | -          | -          | -          | -    |
| Oryctolagus_cuniculus       | -          | -          | -          | -           | -          | -          | -          | -    |
| Gallus_gallus               | -          | -          | -          | -           | -          | -          | -          | -    |
| Hominidae                   | -          | -          | -          | -           | -          | -          | -          | -    |
| Metatheria                  | -          | -          | -          | -           | -          | -          | -          | -    |
| Rodentia                    | -          | -          | -          | -           | -          | -          | -          | -    |
| Monodelphis                 | -          | -          | -          | -           | -          | -          | -          | -    |
| Consensus                   | -          | -          | -          | -           | -          | -          | -          | -    |
| Conservation                | 100%       |            |            |             |            |            |            | 0%   |



|                             | 3,660             | 3,680             | 3,700             |                   |                   |                   |                   |      |
|-----------------------------|-------------------|-------------------|-------------------|-------------------|-------------------|-------------------|-------------------|------|
| Dipodomys_ordii             |                   |                   |                   |                   |                   |                   |                   |      |
| Laurasiatheria              |                   |                   |                   |                   |                   |                   |                   |      |
| Eutheria                    |                   |                   |                   |                   |                   |                   |                   |      |
| Tarsius_syrichta            |                   |                   |                   |                   |                   |                   |                   |      |
| Muridae                     |                   |                   |                   |                   |                   |                   |                   |      |
| Gasterosteus_aculeatus      |                   |                   |                   |                   |                   |                   |                   |      |
| Felis_silvestris            |                   |                   |                   |                   |                   |                   |                   |      |
| Rattus                      |                   |                   |                   |                   |                   |                   |                   |      |
| Papio_hamadryas             | <b>CCCCACTCCT</b> | <b>TCCTCTCTTG</b> | <b>TCTCCTCGTC</b> | <b>GACCCCGCCT</b> | <b>TCCTCTCCAG</b> | <b>CCCCACCTGA</b> | <b>ACTCACCCCC</b> | 1023 |
| Pan_troglodytes             |                   |                   |                   |                   |                   |                   |                   |      |
| Ailuropoda_melanoleuca      |                   |                   |                   |                   |                   |                   |                   |      |
| Cavia_porcellus             |                   |                   |                   |                   |                   |                   |                   |      |
| Ictidomys_tridecemlineatus  |                   |                   |                   |                   |                   |                   |                   |      |
| Canis                       |                   |                   |                   |                   |                   |                   |                   |      |
| Felis_catus                 |                   |                   |                   |                   |                   |                   |                   |      |
| Ochotona_princeps           |                   |                   |                   |                   |                   |                   |                   |      |
| Cercopithecidae             |                   |                   |                   |                   |                   |                   |                   |      |
| Carnivora                   |                   |                   |                   |                   |                   |                   |                   |      |
| Mus                         |                   |                   |                   |                   |                   |                   |                   |      |
| Mus_musculus                |                   |                   |                   |                   |                   |                   |                   |      |
| Rattus_norvegicus           |                   |                   |                   |                   |                   |                   |                   |      |
| Tursiops_truncatus          |                   |                   |                   |                   |                   |                   |                   |      |
| Procapra_capensis           |                   |                   |                   |                   |                   |                   |                   |      |
| Primates                    |                   |                   |                   |                   |                   |                   |                   |      |
| Echinops_telfairi           |                   |                   |                   |                   |                   |                   |                   |      |
| Sorex_araneus               |                   |                   |                   |                   |                   |                   |                   |      |
| Canidae                     |                   |                   |                   |                   |                   |                   |                   |      |
| Otolemur_garnettii          |                   |                   |                   |                   |                   |                   |                   |      |
| Gallus                      |                   |                   |                   |                   |                   |                   |                   |      |
| Callithrix_jacchus          |                   |                   |                   |                   |                   |                   |                   |      |
| Crocodylus_porosus          |                   |                   |                   |                   |                   |                   |                   |      |
| Erinaceus_europaeus         |                   |                   |                   |                   |                   |                   |                   |      |
| rnd-6_family-7426-LTR-ERV1  |                   |                   |                   |                   |                   |                   |                   |      |
| Esox_lucius                 |                   |                   |                   |                   |                   |                   |                   |      |
| Salmo_salar                 |                   |                   |                   |                   |                   |                   |                   |      |
| Didelphidae                 |                   |                   |                   |                   |                   |                   |                   |      |
| Latimeria_chalumnae         |                   |                   |                   |                   |                   |                   |                   |      |
| Monodelphis_domestica       |                   |                   |                   |                   |                   |                   |                   |      |
| Macropus_eugenii            |                   |                   |                   |                   |                   |                   |                   |      |
| Alligator_mississippiensis  |                   |                   |                   |                   |                   |                   |                   |      |
| Chrysemys_picta_bellii      |                   |                   |                   |                   |                   |                   |                   |      |
| Danio_rerio                 |                   |                   |                   |                   |                   |                   |                   |      |
| Taeniopygia                 |                   |                   |                   |                   |                   |                   |                   |      |
| Dasyus_novemcinctus         |                   |                   |                   |                   |                   |                   |                   |      |
| LTR_XT                      |                   |                   |                   |                   |                   |                   |                   |      |
| Haplorrhini                 | <b>TCNGANTTNA</b> | <b>AGGCTNNCNC</b> | <b>NNCACCNAGC</b> | <b>GACCGNTGTG</b> | <b>TCTTACTGCA</b> | <b>ATATATAGAT</b> | <b>GATCTGCTGT</b> | 3681 |
| Catarrhini                  | <b>CGAGACCTGC</b> | <b>AAAAGTTTCC</b> | <b>TGCTAAAGAC</b> | <b>CTAGGCTGCG</b> | <b>TCTTGCTCCT</b> | <b>GTACGTGGAC</b> | <b>GACCTTCTGC</b> | 3189 |
| Anolis_carolinensis         |                   |                   |                   |                   |                   |                   |                   |      |
| Murine_leukemia_virus       | <b>AGAGACCTAG</b> | <b>CAGACTTCCG</b> | <b>GATCCAGCAC</b> | <b>CCAGACTTGA</b> | <b>TCCTGCTACA</b> | <b>GTACGTGGAT</b> | <b>GACNTACTGC</b> | 3158 |
| Phascolarctos_cinereus      | <b>CGGGATCTGG</b> | <b>CATCNNNNNG</b> | <b>NGNNNNNAAN</b> | <b>CNNNAGGNAG</b> | <b>NNATNNTNCN</b> | <b>NTNNNTGAT</b>  | <b>GNNNNCNNNN</b> | 3055 |
| Estrildidae                 |                   |                   |                   |                   |                   |                   |                   |      |
| Xenopus_Silurana_tropicalis |                   |                   |                   |                   |                   |                   |                   |      |
| L_XT                        | <b>GCTGCTGTTT</b> | <b>GANAGANTTG</b> | <b>CGNGNCTGTC</b> | <b>TANGGAACGA</b> | <b>TTGCNCAATN</b> | <b>GTATGTTGAN</b> | <b>GTCTTGCTNA</b> | 3188 |
| Takifugu_rubripes           |                   |                   |                   |                   |                   |                   |                   |      |
| Bos_taurus                  |                   |                   |                   |                   |                   |                   |                   |      |
| Homo_sapiens                |                   |                   |                   |                   |                   |                   |                   |      |
| Microcebus_murinus          |                   |                   |                   |                   |                   |                   |                   |      |
| Myotis_lucifugus            |                   |                   |                   |                   |                   |                   |                   |      |
| Equus_caballus              |                   |                   |                   |                   |                   |                   |                   |      |
| Tupaia_belangeri            |                   |                   |                   |                   |                   |                   |                   |      |
| Loxodonta_africana          |                   |                   |                   |                   |                   |                   |                   |      |
| Murinae                     |                   |                   |                   |                   |                   |                   |                   |      |
| Canis_lupus_familiaris      |                   |                   |                   |                   |                   |                   |                   |      |
| Sus_scrofa                  |                   |                   |                   |                   |                   |                   |                   |      |
| Choloepus_hoffmanni         |                   |                   |                   |                   |                   |                   |                   |      |
| Vicugna_pacos               |                   |                   |                   |                   |                   |                   |                   |      |
| Gavialis_gangeticus         |                   |                   |                   |                   |                   |                   |                   |      |
| Mammalia                    |                   |                   |                   |                   |                   |                   |                   |      |
| Passeroidea                 |                   |                   |                   |                   |                   |                   |                   |      |
| Takifugu                    |                   |                   |                   |                   |                   |                   |                   |      |
| Pteropus_vampyrus           |                   |                   |                   |                   |                   |                   |                   |      |
| Ornithorhynchus             |                   |                   |                   |                   |                   |                   |                   |      |
| Oryctolagus_cuniculus       |                   |                   |                   |                   |                   |                   |                   |      |
| Gallus_gallus               |                   |                   |                   |                   |                   |                   |                   |      |
| Hominidae                   |                   |                   |                   |                   |                   |                   |                   |      |
| Metatheria                  |                   |                   |                   |                   |                   |                   |                   |      |
| Rodentia                    |                   |                   |                   |                   |                   |                   |                   |      |
| Monodelphis                 |                   |                   |                   |                   |                   |                   |                   |      |
| Consensus                   |                   |                   |                   |                   |                   |                   |                   |      |
| Conservation                | 100%              |                   |                   |                   |                   |                   |                   | 0%   |

|                             | 3,720      | 3,740      | 3,760      | 3,780      |            |            |            |      |
|-----------------------------|------------|------------|------------|------------|------------|------------|------------|------|
| Dipodomys_ordii             | ----       | ----       | ----       | ----       | -          |            |            |      |
| Laurasiatheria              | ----       | ----       | ----       | ----       | -          |            |            |      |
| Eutheria                    | ----       | ----       | ----       | ----       | -          |            |            |      |
| Tarsius_syrichtha           | ----       | ----       | ----       | ----       | -          |            |            |      |
| Muridae                     | ----       | ----       | ----       | ----       | -          |            |            |      |
| Gasterosteus_aculeatus      | ----       | ----       | ----       | ----       | -          |            |            |      |
| Felis_silvestris            | ----       | ----       | ----       | ----       | -          |            |            |      |
| Rattus                      | ----       | ----       | ----       | ----       | -          |            |            |      |
| Papio_hamadryas             | AGGACCCCGC | CACAAAACCC | CCGTCTCCGC | CTCCGGCGGG | CCGAAGGTCA | GGATGGCCCT | TCCACCTGGC | 1093 |
| Pan_troglodytes             | ----       | ----       | ----       | ----       | -          |            |            |      |
| Ailuropoda_melanoleuca      | ----       | ----       | ----       | ----       | -          |            |            |      |
| Cavia_porcellus             | ----       | ----       | ----       | ----       | -          |            |            |      |
| Ictidomys_tridecemlineatus  | ----       | ----       | ----       | ----       | -          |            |            |      |
| Canis                       | ----       | ----       | ----       | ----       | -          |            |            |      |
| Felis_catus                 | ----       | ----       | ----       | ----       | -          |            |            |      |
| Ochotona_princeps           | ----       | ----       | ----       | ----       | -          |            |            |      |
| Cercopithecidae             | ----       | ----       | ----       | ----       | -          |            |            |      |
| Carnivora                   | ----       | ----       | ----       | ----       | -          |            |            |      |
| Mus                         | ----       | ----       | ----       | ----       | -          |            |            |      |
| Mus_musculus                | ----       | ----       | ----       | ----       | -          |            |            |      |
| Rattus_norvegicus           | ----       | ----       | ----       | ----       | -          |            |            |      |
| Tursiops_truncatus          | ----       | ----       | ----       | ----       | -          |            |            |      |
| Procyon_capensis            | ----       | ----       | ----       | ----       | -          |            |            |      |
| Primates                    | ----       | ----       | ----       | ----       | -          |            |            |      |
| Echinops_telfairi           | ----       | ----       | ----       | ----       | -          |            |            |      |
| Sorex_araneus               | ----       | ----       | ----       | ----       | -          |            |            |      |
| Canidae                     | ----       | ----       | ----       | ----       | -          |            |            |      |
| Otomomys_garnettii          | ----       | ----       | ----       | ----       | -          |            |            |      |
| Gallus                      | ----       | ----       | ----       | ----       | -          |            |            |      |
| Callithrix_jacchus          | ----       | ----       | ----       | ----       | -          |            |            |      |
| Crocodylus_porosus          | ----       | ----       | ----       | ----       | -          |            |            |      |
| Erinaceus_europaeus         | ----       | ----       | ----       | ----       | -          |            |            |      |
| rnd-6_family-7426-LTR-ERV1  | ----       | ----       | ----       | ----       | -          |            |            |      |
| Esox_lucius                 | ----       | ----       | ----       | ----       | -          |            |            |      |
| Salmo_salar                 | ----       | ----       | ----       | ----       | -          |            |            |      |
| Didelphidae                 | ----       | ----       | ----       | ----       | -          |            |            |      |
| Latimeria_chalumnae         | ----       | ----       | ----       | ----       | -          |            |            |      |
| Monodelphis_domestica       | ----       | ----       | ----       | ----       | -          |            |            |      |
| Macropus_eugenii            | ----       | ----       | ----       | ----       | -          |            |            |      |
| Alligator_mississippiensis  | ----       | ----       | ----       | ----       | -          |            |            |      |
| Chrysemys_picta_bellii      | ----       | ----       | ----       | ----       | -          |            |            |      |
| Danio_rerio                 | ----       | ----       | ----       | ----       | -          |            |            |      |
| Taeniopygia                 | ----       | ----       | ----       | ----       | -          |            |            |      |
| Dasyus_novemcinctus         | ----       | ----       | ----       | ----       | -          |            |            |      |
| LTR_XT                      | ----       | ----       | ----       | ----       | -          |            |            |      |
| Haplorrhini                 | TAGCCGCACC | CACNAGAAAG | GAATGTATCC | AAGGAACAGA | GA-GTCTCCT | TCGAGTGCTG | TGGGAAGCTG | 3750 |
| Catarrhini                  | TGGGACACTC | CACGGCAGTC | GGGTGTGCAA | AAGGGATGGA | TG-CCCTGCT | TCGGCACCTG | GAGGACTGTG | 3258 |
| Anolis_carolinensis         | ----       | ----       | ----       | ----       | -          |            |            |      |
| Murine_leukemia_virus       | TGGCCGCCAC | TTCCGAGCTC | GACTGCCAAC | AAGGTAICTG | GG-CCCTNCT | ACAAAACCTA | GGGGACCTCG | 3227 |
| Phascolarctos_cinereus      | NNGNGGNCCC | AANGTNNNGN | GACNGNNNNN | NNNNGNCACA | GNANNNNNTN | ANAGNAANNA | ANNNANNNNN | 3125 |
| Estrildidae                 | ----       | ----       | ----       | ----       | -          |            |            |      |
| Xenopus_Silurana_tropicalis | GNANNGCAAN | CTCGAGAAAC | AGGTAAANTA | CATNCTTCCA | CNTCTCTGCT | ATAATATCTA | CATGAATGTG | 3258 |
| I_XT                        | ----       | ----       | ----       | ----       | -          |            |            |      |
| Takifugu_rubripes           | ----       | ----       | ----       | ----       | -          |            |            |      |
| Bos_taurus                  | ----       | ----       | ----       | ----       | -          |            |            |      |
| Homo_sapiens                | ----       | ----       | ----       | ----       | -          |            |            |      |
| Microcebus_murinus          | ----       | ----       | ----       | ----       | -          |            |            |      |
| Myotis_lucifugus            | ----       | ----       | ----       | ----       | -          |            |            |      |
| Equus_caballus              | ----       | ----       | ----       | ----       | -          |            |            |      |
| Tupaia_belangeri            | ----       | ----       | ----       | ----       | -          |            |            |      |
| Loxodonta_africana          | ----       | ----       | ----       | ----       | -          |            |            |      |
| Murinae                     | ----       | ----       | ----       | ----       | -          |            |            |      |
| Canis_lupus_familiaris      | ----       | ----       | ----       | ----       | -          |            |            |      |
| Sus_scrofa                  | ----       | ----       | ----       | ----       | -          |            |            |      |
| Choloepus_hoffmanni         | ----       | ----       | ----       | ----       | -          |            |            |      |
| Vicugna_pacos               | ----       | ----       | ----       | ----       | -          |            |            |      |
| Gavialis_gangeticus         | ----       | ----       | ----       | ----       | -          |            |            |      |
| Mammalia                    | ----       | ----       | ----       | ----       | -          |            |            |      |
| Passeroidea                 | ----       | ----       | ----       | ----       | -          |            |            |      |
| Takifugu                    | ----       | ----       | ----       | ----       | -          |            |            |      |
| Pteropus_vampyrus           | ----       | ----       | ----       | ----       | -          |            |            |      |
| Ornithorhynchus             | ----       | ----       | ----       | ----       | -          |            |            |      |
| Oryctolagus_cuniculus       | ----       | ----       | ----       | ----       | -          |            |            |      |
| Gallus_gallus               | ----       | ----       | ----       | ----       | -          |            |            |      |
| Hominidae                   | ----       | ----       | TTGGT      | GCCAAAACCC | GGGAGGAGAC | CCCTCTCTGA | CCCAGGGTCG | 45   |
| Metatheria                  | ----       | ----       | ----       | ----       | -          |            |            |      |
| Rodentia                    | ----       | ----       | ----       | ----       | -          |            |            |      |
| Monodelphis                 | ----       | ----       | ----       | ----       | -          |            |            |      |
| Consensus                   | ----       | ----       | ----       | ----       | -          |            |            |      |
| Conservation                | 100%       | 9%         |            |            |            |            |            |      |

|                             | 3,800             | 3,820             | 3,840             |                   |                   |                   |                   |       |
|-----------------------------|-------------------|-------------------|-------------------|-------------------|-------------------|-------------------|-------------------|-------|
| Dipodomys_ordii             | -----             | -----             | -----             | -----             |                   |                   |                   |       |
| Laurasiatheria              | -----             | -----             | -----             | -----             |                   |                   |                   |       |
| Eutheria                    | -----             | -----             | -----             | -----             |                   |                   |                   |       |
| Tarsius_syrichta            | -----             | -----             | -----             | -----             |                   |                   |                   |       |
| Muridae                     | -----             | -----             | -----             | -----             |                   |                   |                   |       |
| Gasterosteus_aculeatus      | -----             | -----             | -----             | -----             |                   |                   |                   |       |
| Felis_silvestris            | -----             | -----             | -----             | -----             |                   |                   |                   |       |
| Rattus                      | -----             | -----             | -----             | -----             |                   |                   |                   |       |
| Papio_hamadryas             | <b>AATCTTCCT</b>  | <b>TTTTCCCCT</b>  | <b>CGCACGGTCA</b> | <b>ACCGCACGAT</b> | <b>CCAGTACTGG</b> | <b>CCCTTTTCTG</b> | <b>CCTCGGACCT</b> | 1163  |
| Pan_troglodytes             | -----             | -----             | -----             | -----             | -----             | -----             | -----             | ----- |
| Ailuropoda_melanoleuca      | -----             | -----             | -----             | -----             | -----             | -----             | -----             | ----- |
| Cavia_porcellus             | -----             | -----             | -----             | -----             | -----             | -----             | -----             | ----- |
| Ictidomys_tridecemlineatus  | -----             | -----             | -----             | -----             | -----             | -----             | -----             | ----- |
| Canis                       | -----             | -----             | -----             | -----             | -----             | -----             | -----             | ----- |
| Felis_catus                 | -----             | -----             | -----             | -----             | -----             | -----             | -----             | ----- |
| Ochotona_princeps           | -----             | -----             | -----             | -----             | -----             | -----             | -----             | ----- |
| Cercopithecidae             | -----             | -----             | -----             | -----             | -----             | -----             | -----             | ----- |
| Carnivora                   | -----             | -----             | -----             | -----             | -----             | -----             | -----             | ----- |
| Mus                         | -----             | -----             | -----             | -----             | -----             | -----             | -----             | ----- |
| Mus_musculus                | -----             | -----             | -----             | -----             | -----             | -----             | -----             | ----- |
| Rattus_norvegicus           | -----             | -----             | -----             | -----             | -----             | -----             | -----             | ----- |
| Tursiops_truncatus          | -----             | -----             | -----             | -----             | -----             | -----             | -----             | ----- |
| Procyonidae                 | -----             | -----             | -----             | -----             | -----             | -----             | -----             | ----- |
| Primates                    | -----             | -----             | -----             | -----             | -----             | -----             | -----             | ----- |
| Echinops_telfairi           | -----             | -----             | -----             | -----             | -----             | -----             | -----             | ----- |
| Sorex_araneus               | -----             | -----             | -----             | -----             | -----             | -----             | -----             | ----- |
| Canidae                     | -----             | -----             | -----             | -----             | -----             | -----             | -----             | ----- |
| Otomomys_garnettii          | -----             | -----             | -----             | -----             | -----             | -----             | -----             | ----- |
| Gallus                      | -----             | -----             | -----             | -----             | -----             | -----             | -----             | ----- |
| Callithrix_jacchus          | -----             | -----             | -----             | -----             | -----             | -----             | -----             | ----- |
| Crocodylus_porosus          | -----             | -----             | -----             | -----             | -----             | -----             | -----             | ----- |
| Erinaceus_europaeus         | -----             | -----             | -----             | -----             | -----             | -----             | -----             | ----- |
| rnd-6_family-7426-LTR-ERV1  | -----             | -----             | -----             | -----             | -----             | -----             | -----             | ----- |
| Esox_lucius                 | -----             | -----             | -----             | -----             | -----             | -----             | -----             | ----- |
| Salmo_salar                 | -----             | -----             | -----             | -----             | -----             | -----             | -----             | ----- |
| Didelphidae                 | -----             | -----             | -----             | -----             | -----             | -----             | -----             | ----- |
| Latimeria_chalumnae         | -----             | -----             | -----             | -----             | -----             | -----             | -----             | ----- |
| Monodelphis_domestica       | -----             | -----             | -----             | -----             | -----             | -----             | -----             | ----- |
| Macropus_eugenii            | -----             | -----             | -----             | -----             | -----             | -----             | -----             | ----- |
| Alligator_mississippiensis  | -----             | -----             | -----             | -----             | -----             | -----             | -----             | ----- |
| Chrysemys_picta_bellii      | -----             | -----             | -----             | -----             | -----             | -----             | -----             | ----- |
| Danio_rerio                 | -----             | -----             | -----             | -----             | -----             | -----             | -----             | ----- |
| Taeniopygia                 | -----             | -----             | -----             | -----             | -----             | -----             | -----             | ----- |
| Dasyus_novemcinctus         | -----             | -----             | -----             | -----             | -----             | -----             | -----             | ----- |
| LTR_XT                      | -----             | -----             | -----             | -----             | -----             | -----             | -----             | ----- |
| Haplorrhini                 | <b>GCTATAAAGT</b> | <b>GTCTAAGGAA</b> | <b>AAGGCACAGA</b> | <b>TCTGTGGCCA</b> | <b>AGGAGTTCAG</b> | <b>TATCTTGGCT</b> | <b>TTTACGTCTC</b> | 3820  |
| Catarrhini                  | <b>GGTATAAGGT</b> | <b>GTCCAAGAAG</b> | <b>AAAGTCTAGA</b> | <b>TCTGCAGACA</b> | <b>GCAGGTACGC</b> | <b>TACCTGGGAT</b> | <b>TCACTATTCG</b> | 3328  |
| Anolis_carolinensis         | -----             | -----             | -----             | -----             | -----             | -----             | -----             | ----- |
| Murine_leukemia_virus       | <b>GATACCGGGC</b> | <b>CTCGGCCAAG</b> | <b>AAAGCCCAA</b>  | <b>TCTGCCAGAA</b> | <b>ACAGGTCAAG</b> | <b>TACCTGGGGT</b> | <b>ACCTTCTGAG</b> | 3297  |
| Phascolarctos_cinereus      | <b>GATNNNGAGT</b> | <b>GNCNNNCNNN</b> | <b>ANNNCNNNN</b>  | <b>TNNNCNNNN</b>  | <b>GNNAGTTNCA</b> | <b>NANCNCGGNN</b> | <b>NTNTGCTAAA</b> | 3195  |
| Estrildidae                 | -----             | -----             | -----             | -----             | -----             | -----             | -----             | ----- |
| Xenopus_Silurana_tropicalis | -----             | -----             | -----             | -----             | -----             | -----             | -----             | ----- |
| LTR_XT                      | <b>GATTTAATAN</b> | <b>ANCACTNTC</b>  | <b>AAATTGCATT</b> | <b>TCNGTCAGNG</b> | <b>GCAAGTACAN</b> | <b>TATATGGGAC</b> | <b>NGTGTATNTC</b> | 3328  |
| Takifugu_rubripes           | -----             | -----             | -----             | -----             | -----             | -----             | -----             | ----- |
| Bos_taurus                  | -----             | -----             | -----             | -----             | -----             | -----             | -----             | ----- |
| Homo_sapiens                | -----             | -----             | -----             | -----             | -----             | -----             | -----             | ----- |
| Microcebus_murinus          | -----             | -----             | -----             | -----             | -----             | -----             | -----             | ----- |
| Myotis_lucifugus            | -----             | -----             | -----             | -----             | -----             | -----             | -----             | ----- |
| Equus_caballus              | -----             | -----             | -----             | -----             | -----             | -----             | -----             | ----- |
| Tupaia_belangeri            | -----             | -----             | -----             | -----             | -----             | -----             | -----             | ----- |
| Loxodonta_africana          | -----             | -----             | -----             | -----             | -----             | -----             | -----             | ----- |
| Murinae                     | -----             | -----             | -----             | -----             | -----             | -----             | -----             | ----- |
| Canis_lupus_familiaris      | -----             | -----             | -----             | -----             | -----             | -----             | -----             | ----- |
| Sus_scrofa                  | -----             | -----             | -----             | -----             | -----             | -----             | -----             | ----- |
| Choloepus_hoffmanni         | -----             | -----             | -----             | -----             | -----             | -----             | -----             | ----- |
| Vicugna_pacos               | -----             | -----             | -----             | -----             | -----             | -----             | -----             | ----- |
| Gavialis_gangeticus         | -----             | -----             | -----             | -----             | -----             | -----             | -----             | ----- |
| Mammalia                    | -----             | -----             | -----             | -----             | -----             | -----             | -----             | ----- |
| Passeroidea                 | -----             | -----             | -----             | -----             | -----             | -----             | -----             | ----- |
| Takifugu                    | -----             | -----             | -----             | -----             | -----             | -----             | -----             | ----- |
| Pteropus_vampyrus           | -----             | -----             | -----             | -----             | -----             | -----             | -----             | ----- |
| Ornithorhynchus             | -----             | -----             | -----             | -----             | -----             | -----             | -----             | ----- |
| Oryctolagus_cuniculus       | -----             | -----             | -----             | -----             | -----             | -----             | -----             | ----- |
| Gallus_gallus               | -----             | -----             | -----             | -----             | -----             | -----             | -----             | ----- |
| Hominidae                   | <b>GGGAGCATCT</b> | <b>CCTCTCCCTA</b> | <b>CCTGCCAGGA</b> | <b>ACCAGACTCG</b> | <b>GGCCAGCGCA</b> | <b>TTCGGCCTTC</b> | <b>GCTATTGGGT</b> | 115   |
| Metatheria                  | -----             | -----             | -----             | -----             | -----             | -----             | -----             | ----- |
| Rodentia                    | -----             | -----             | -----             | -----             | -----             | -----             | -----             | ----- |
| Monodelphis                 | -----             | -----             | -----             | -----             | -----             | -----             | -----             | ----- |
| Consensus                   | -----             | -----             | -----             | -----             | -----             | -----             | -----             | ----- |
| Conservation                | 100%              | -----             | -----             | -----             | -----             | -----             | -----             | 0%    |

|                             | 3,860             | 3,880             | 3,900              | 3,920             |                   |                   |                   |      |
|-----------------------------|-------------------|-------------------|--------------------|-------------------|-------------------|-------------------|-------------------|------|
| Dipodomys_ordii             | -----             | -----             | -----              | -----             | -                 |                   |                   |      |
| Laurasiatheria              | -----             | -----             | -----              | -----             | -                 |                   |                   |      |
| Eutheria                    | -----             | -----             | -----              | -----             | -                 |                   |                   |      |
| Tarsius_syrichta            | -----             | -----             | -----              | -----             | -                 |                   |                   |      |
| Muridae                     | -----             | -----             | -----              | -----             | -                 |                   |                   |      |
| Gasterosteus_aculeatus      | -----             | -----             | -----              | -----             | -                 |                   |                   |      |
| Felis_silvestris            | -----             | -----             | -----              | -----             | -                 |                   |                   |      |
| Rattus                      | -----             | -----             | -----              | -----             | -                 |                   |                   |      |
| Papio_hamadryas             | <b>CTATAATTGG</b> | <b>AAAACCCATA</b> | <b>ACCCCTCCTT</b>  | <b>TTCCCAAGAC</b> | <b>CCCCAGGCCT</b> | <b>TGACCTCGTT</b> | <b>GATAGAATCA</b> | 1233 |
| Pan_troglodytes             | -----             | -----             | -----              | -----             | -                 |                   |                   |      |
| Ailuropoda_melanoleuca      | -----             | -----             | -----              | -----             | -                 |                   |                   |      |
| Cavia_porcellus             | -----             | -----             | -----              | -----             | -                 |                   |                   |      |
| Ictidomys_tridecemlineatus  | -----             | -----             | -----              | -----             | -                 |                   |                   |      |
| Canis                       | -----             | -----             | -----              | -----             | -                 |                   |                   |      |
| Felis_catus                 | -----             | -----             | -----              | -----             | -                 |                   |                   |      |
| Ochotona_princeps           | -----             | -----             | -----              | -----             | -                 |                   |                   |      |
| Cercopithecidae             | -----             | -----             | -----              | -----             | -                 |                   |                   |      |
| Carnivora                   | -----             | -----             | -----              | -----             | -                 |                   |                   |      |
| Mus                         | -----             | -----             | -----              | -----             | -                 |                   |                   |      |
| Mus_musculus                | -----             | -----             | -----              | -----             | -                 |                   |                   |      |
| Rattus_norvegicus           | -----             | -----             | -----              | -----             | -                 |                   |                   |      |
| Tursiops_truncatus          | -----             | -----             | -----              | -----             | -                 |                   |                   |      |
| Procapra_capensis           | -----             | -----             | -----              | -----             | -                 |                   |                   |      |
| Primates                    | -----             | -----             | -----              | -----             | -                 |                   |                   |      |
| Echinops_telfairi           | -----             | -----             | -----              | -----             | -                 |                   |                   |      |
| Sorex_araneus               | -----             | -----             | -----              | -----             | -                 |                   |                   |      |
| Canidae                     | -----             | -----             | -----              | -----             | -                 |                   |                   |      |
| Otomur_garnettii            | -----             | -----             | -----              | -----             | -                 |                   |                   |      |
| Gallus                      | -----             | -----             | -----              | -----             | -                 |                   |                   |      |
| Callithrix_jacchus          | -----             | -----             | -----              | -----             | -                 |                   |                   |      |
| Crocodylus_porosus          | -----             | -----             | -----              | -----             | -                 |                   |                   |      |
| Erinaceus_europaeus         | -----             | -----             | -----              | -----             | -                 |                   |                   |      |
| rnd-6_family-7426-LTR-ERV1  | -----             | -----             | -----              | -----             | -                 |                   |                   |      |
| Esox_lucius                 | -----             | -----             | -----              | -----             | -                 |                   |                   |      |
| Salmo_salar                 | -----             | -----             | -----              | -----             | -                 |                   |                   |      |
| Didelphidae                 | -----             | -----             | -----              | -----             | -                 |                   |                   |      |
| Latimeria_chalumnae         | -----             | -----             | -----              | -----             | -                 |                   |                   |      |
| Monodelphis_domestica       | -----             | -----             | -----              | -----             | -                 |                   |                   |      |
| Macropus_eugenii            | -----             | -----             | -----              | -----             | -                 |                   |                   |      |
| Alligator_mississippiensis  | -----             | -----             | -----              | -----             | -                 |                   |                   |      |
| Chrysemys_picta_bellii      | -----             | -----             | -----              | -----             | -                 |                   |                   |      |
| Danio_rerio                 | -----             | -----             | -----              | -----             | -                 |                   |                   |      |
| Taeniopygia                 | -----             | -----             | -----              | -----             | -                 |                   |                   |      |
| Dasyus_novemcinctus         | -----             | -----             | -----              | -----             | -                 |                   |                   |      |
| LTR_XT                      | -----             | -----             | -----              | -----             | -                 |                   |                   |      |
| Haplorrhini                 | <b>CCAAGGGCGG</b> | <b>CGTGAGCTTG</b> | <b>GGCGGGAGCG</b>  | <b>AAAAGAGACT</b> | <b>GTC-TGTAGC</b> | <b>ATTCTCAGC</b>  | <b>CAGACACAAG</b> | 3889 |
| Catarrhini                  | <b>GAAAGGGGAG</b> | <b>CGCAGCCTGG</b> | <b>GGTCAGAAAAG</b> | <b>AAAGCAGGTC</b> | <b>ATC-TGCAGC</b> | <b>CTACCGGAAC</b> | <b>CTAGAACCAG</b> | 3397 |
| Anolis_carolinensis         | -----             | -----             | -----              | -----             | -                 |                   |                   |      |
| Murine_leukemia_virus       | <b>GGAGGGTCAG</b> | <b>AGATGGCTGA</b> | <b>CTGAGGCCAG</b>  | <b>AAAAGAGACT</b> | <b>GTGATGGGGC</b> | <b>AGCCC-GCTC</b> | <b>CGAAGACCCC</b> | 3366 |
| Phascolarctos_cinereus      | <b>NNNNNNNAG</b>  | <b>ANATNGCTGA</b> | <b>NCNCANCCCG</b>  | <b>AANNNGNNCT</b> | <b>NNNNTGNNNN</b> | <b>TCNNCAGNNN</b> | <b>CTANAACCCN</b> | 3265 |
| Estrildidae                 | -----             | -----             | -----              | -----             | -                 |                   |                   |      |
| Xenopus_Silurana_tropicalis | -----             | -----             | -----              | -----             | -                 |                   |                   |      |
| IXT                         | <b>NATGGGTCNT</b> | <b>NNTTNTNTTA</b> | <b>ACACGGTAAN</b>  | <b>ANTATACAGG</b> | <b>TTATNCCATT</b> | <b>NAGTATCNAA</b> | <b>ACNACAATGT</b> | 3398 |
| Takifugu_rubripes           | -----             | -----             | -----              | -----             | -                 |                   |                   |      |
| Bos_taurus                  | -----             | -----             | -----              | -----             | -                 |                   |                   |      |
| Homo_sapiens                | -----             | -----             | -----              | -----             | -                 |                   |                   |      |
| Microcebus_murinus          | -----             | -----             | -----              | -----             | -                 |                   |                   |      |
| Myotis_lucifugus            | -----             | -----             | -----              | -----             | -                 |                   |                   |      |
| Equus_caballus              | -----             | -----             | -----              | -----             | -                 |                   |                   |      |
| Tupaia_belangeri            | -----             | -----             | -----              | -----             | -                 |                   |                   |      |
| Loxodonta_africana          | -----             | -----             | -----              | -----             | -                 |                   |                   |      |
| Murinae                     | -----             | -----             | -----              | -----             | -                 |                   |                   |      |
| Canis_lupus_familiaris      | -----             | -----             | -----              | -----             | -                 |                   |                   |      |
| Sus_scrofa                  | -----             | -----             | -----              | -----             | -                 |                   |                   |      |
| Choloepus_hoffmanni         | -----             | -----             | -----              | -----             | -                 |                   |                   |      |
| Vicugna_pacos               | -----             | -----             | -----              | -----             | -                 |                   |                   |      |
| Gavialis_gangeticus         | -----             | -----             | -----              | -----             | -                 |                   |                   |      |
| Mammalia                    | -----             | -----             | -----              | -----             | -                 |                   |                   |      |
| Passeroidea                 | -----             | -----             | -----              | -----             | -                 |                   |                   |      |
| Takifugu                    | -----             | -----             | -----              | -----             | -                 |                   |                   |      |
| Pteropus_vampyrus           | -----             | -----             | -----              | -----             | -                 |                   |                   |      |
| Ornithorhynchus             | -----             | -----             | -----              | -----             | -                 |                   |                   |      |
| Oryctolagus_cuniculus       | -----             | -----             | -----              | -----             | -                 |                   |                   |      |
| Gallus_gallus               | -----             | -----             | -----              | -----             | -                 |                   |                   |      |
| Hominidae                   | <b>AAGTCTCCCC</b> | <b>TCCGTCCTGT</b> | <b>AGGCCCCGGG</b>  | <b>AACCTCTGTC</b> | <b>CGTAATCGCG</b> | <b>GCCACGTCAG</b> | <b>AGTCTTCCCC</b> | 185  |
| Metatheria                  | -----             | -----             | -----              | -----             | -                 |                   |                   |      |
| Rodentia                    | -----             | -----             | -----              | -----             | -                 |                   |                   |      |
| Monodelphis                 | -----             | -----             | -----              | -----             | -                 |                   |                   |      |
| Consensus                   | -----             | -----             | -----              | -----             | -                 |                   |                   |      |
| Conservation                | 100%              | -----             | -----              | -----             | -----             | -----             | -----             | 0%   |

|                             | 3,940              | 3,960             | 3,980             |                   |                   |                   |                   |      |
|-----------------------------|--------------------|-------------------|-------------------|-------------------|-------------------|-------------------|-------------------|------|
| Dipodomys_ordii             | ----               | ----              | ----              | -                 |                   |                   |                   |      |
| Laurasiatheria              | ----               | ----              | ----              | -                 |                   |                   |                   |      |
| Eutheria                    | ----               | ----              | ----              | -                 |                   |                   |                   |      |
| Tarsius_syrichta            | ----               | ----              | ----              | -                 |                   |                   |                   |      |
| Muridae                     | ----               | ----              | ----              | -                 |                   |                   |                   |      |
| Gasterosteus_aculeatus      | ----               | ----              | ----              | -                 |                   |                   |                   |      |
| Felis_silvestris            | ----               | ----              | ----              | -                 |                   |                   |                   |      |
| Rattus                      | ----               | ----              | ----              | -                 |                   |                   |                   |      |
| Papio_hamadryas             | <b>ATTCTCCTCA</b>  | <b>CCCACCAGCC</b> | <b>TACCTGGGAT</b> | <b>GATTGTCAAC</b> | <b>AGCTTTTGCA</b> | <b>GGTCCTTCTA</b> | <b>ACCACCGAAG</b> | 1303 |
| Pan_troglodytes             | ----               | ----              | ----              | ----              | ----              | ----              | ----              | -    |
| Ailuropoda_melanoleuca      | ----               | ----              | ----              | ----              | ----              | ----              | ----              | -    |
| Cavia_porcellus             | ----               | ----              | ----              | ----              | ----              | ----              | ----              | -    |
| Ictidomys_tridecemlineatus  | ----               | ----              | ----              | ----              | ----              | ----              | ----              | -    |
| Canis                       | ----               | ----              | ----              | ----              | ----              | ----              | ----              | -    |
| Felis_catus                 | ----               | ----              | ----              | ----              | ----              | ----              | ----              | -    |
| Ochotona_princeps           | ----               | ----              | ----              | ----              | ----              | ----              | ----              | -    |
| Cercopithecidae             | ----               | ----              | ----              | ----              | ----              | ----              | ----              | -    |
| Carnivora                   | ----               | ----              | ----              | ----              | ----              | ----              | ----              | -    |
| Mus                         | ----               | ----              | ----              | ----              | ----              | ----              | ----              | -    |
| Mus_musculus                | ----               | ----              | ----              | ----              | ----              | ----              | ----              | -    |
| Rattus_norvegicus           | ----               | ----              | ----              | ----              | ----              | ----              | ----              | -    |
| Tursiops_truncatus          | ----               | ----              | ----              | ----              | ----              | ----              | ----              | -    |
| Procapra_capensis           | ----               | ----              | ----              | ----              | ----              | ----              | ----              | -    |
| Primates                    | ----               | ----              | ----              | ----              | ----              | ----              | ----              | -    |
| Echinops_telfairi           | ----               | ----              | ----              | ----              | ----              | ----              | ----              | -    |
| Sorex_araneus               | ----               | ----              | ----              | ----              | ----              | ----              | ----              | -    |
| Canidae                     | ----               | ----              | ----              | ----              | ----              | ----              | ----              | -    |
| Otomomys_garnettii          | ----               | ----              | ----              | ----              | ----              | ----              | ----              | -    |
| Gallus                      | ----               | ----              | ----              | ----              | ----              | ----              | ----              | -    |
| Callithrix_jacchus          | ----               | ----              | ----              | ----              | ----              | ----              | ----              | -    |
| Crocodylus_porosus          | ----               | ----              | ----              | ----              | ----              | ----              | ----              | -    |
| Erinaceus_europaeus         | ----               | ----              | ----              | ----              | ----              | ----              | ----              | -    |
| rnd-6_family-7426-LTR-ERV1  | ----               | ----              | ----              | ----              | ----              | ----              | ----              | -    |
| Esox_lucius                 | ----               | ----              | ----              | ----              | ----              | ----              | ----              | -    |
| Salmo_salar                 | ----               | ----              | ----              | ----              | ----              | ----              | ----              | -    |
| Didelphidae                 | ----               | ----              | ----              | ----              | ----              | ----              | ----              | -    |
| Latimeria_chalumnae         | ----               | ----              | ----              | ----              | ----              | ----              | ----              | -    |
| Monodelphis_domestica       | ----               | ----              | ----              | ----              | ----              | ----              | ----              | -    |
| Macropus_eugenii            | ----               | ----              | ----              | ----              | ----              | ----              | ----              | -    |
| Alligator_mississippiensis  | ----               | ----              | ----              | ----              | ----              | ----              | ----              | -    |
| Chrysemys_picta_bellii      | ----               | ----              | ----              | ----              | ----              | ----              | ----              | -    |
| Danio_rerio                 | ----               | ----              | ----              | ----              | ----              | ----              | ----              | -    |
| Taeniopygia                 | ----               | ----              | ----              | ----              | ----              | ----              | ----              | -    |
| Dasyatis_novemcinctus       | ----               | ----              | ----              | ----              | ----              | ----              | ----              | -    |
| LTR_XT                      | ----               | ----              | ----              | ----              | ----              | ----              | ----              | -    |
| Haplorrhini                 | <b>GCGGCAAGTG</b>  | <b>CGGGAATTCC</b> | <b>TAGGGGCAGC</b> | <b>TGGTTTCTGC</b> | <b>CGTATATGGA</b> | <b>TCCCAACTA</b>  | <b>CTCGCTCCTA</b> | 3959 |
| Catarrhini                  | <b>AAGGCAAGTA</b>  | <b>AGGGAATTCC</b> | <b>TAGGAGCTGT</b> | <b>GGGGTTTTGC</b> | <b>AGATTATGGA</b> | <b>TTCCAAACTT</b> | <b>TGCAGTACTA</b> | 3467 |
| Anolis_carolinensis         | ----               | <b>AAGGAATTCT</b> | <b>TC-AGTTTT</b>  | <b>TGCGTTTGTG</b> | <b>TTTTTTTGTG</b> | <b>CTTTA---T</b>  | <b>GAAGGTACAA</b> | 54   |
| Murine_leukemia_virus       | <b>TGCACAACCTA</b> | <b>AGGGAGTTCC</b> | <b>TAGGGACGGC</b> | <b>AGGCTTCTGC</b> | <b>CGCCTCTGGA</b> | <b>TCCTGGGTT</b>  | <b>TGCGGAAATG</b> | 3436 |
| Phascolarctos_cinereus      | <b>CNNNNNAGTC</b>  | <b>CGTGAGTTTT</b> | <b>TNNNCACTGC</b> | <b>TNNNTNNNNN</b> | <b>ANGNTCTNGN</b> | <b>TCCTGGTTC</b>  | <b>CGCTTCCNTN</b> | 3335 |
| Estrildidae                 | ----               | ----              | ----              | ----              | ----              | ----              | ----              | -    |
| Xenopus_Silurana_tropicalis | ----               | ----              | ----              | ----              | ----              | ----              | ----              | -    |
| LTR_XT                      | <b>TACANATAAA</b>  | <b>NTCAGNACAT</b> | <b>TCCTCGGCAC</b> | <b>AGTGGGNAGT</b> | <b>TGTAGAGCAG</b> | <b>TNAGTTTTAN</b> | <b>AAAATGAAAA</b> | 3468 |
| Takifugu_rubripes           | ----               | ----              | ----              | ----              | ----              | ----              | ----              | -    |
| Bos_taurus                  | ----               | ----              | ----              | ----              | ----              | ----              | ----              | -    |
| Homo_sapiens                | ----               | ----              | ----              | ----              | ----              | ----              | ----              | -    |
| Microcebus_murinus          | ----               | ----              | ----              | ----              | ----              | ----              | ----              | -    |
| Myotis_lucifugus            | ----               | ----              | ----              | ----              | ----              | ----              | ----              | -    |
| Equus_caballus              | ----               | ----              | ----              | ----              | ----              | ----              | ----              | -    |
| Tupaia_belangeri            | ----               | ----              | ----              | ----              | ----              | ----              | ----              | -    |
| Loxodonta_africana          | ----               | ----              | ----              | ----              | ----              | ----              | ----              | -    |
| Murinae                     | ----               | ----              | ----              | ----              | ----              | ----              | ----              | -    |
| Canis_lupus_familiaris      | ----               | ----              | ----              | ----              | ----              | ----              | ----              | -    |
| Sus_scrofa                  | ----               | ----              | ----              | ----              | ----              | ----              | ----              | -    |
| Choloepus_hoffmanni         | ----               | ----              | ----              | ----              | ----              | ----              | ----              | -    |
| Vicugna_pacos               | ----               | ----              | ----              | ----              | ----              | ----              | ----              | -    |
| Gavialis_gangeticus         | ----               | ----              | ----              | ----              | ----              | ----              | ----              | -    |
| Mammalia                    | ----               | ----              | ----              | ----              | ----              | ----              | ----              | -    |
| Passeroidea                 | ----               | ----              | ----              | ----              | ----              | ----              | ----              | -    |
| Takifugu                    | ----               | ----              | ----              | ----              | ----              | ----              | ----              | -    |
| Pteropus_vampyrus           | ----               | ----              | ----              | ----              | ----              | ----              | ----              | -    |
| Ornithorhynchus             | ----               | ----              | ----              | ----              | ----              | ----              | ----              | -    |
| Oryctolagus_cuniculus       | ----               | ----              | ----              | ----              | ----              | ----              | ----              | -    |
| Gallus_gallus               | ----               | ----              | ----              | ----              | ----              | ----              | ----              | -    |
| Hominidae                   | <b>CCATCGGTTT</b>  | <b>CCGACTACGG</b> | <b>GACCGAGGAC</b> | <b>GCGGAGACGT</b> | <b>CCGTCCTCCT</b> | <b>CGGCCTCCGC</b> | <b>CATCCGCGCT</b> | 255  |
| Metatheria                  | ----               | ----              | ----              | ----              | ----              | ----              | ----              | -    |
| Rodentia                    | ----               | ----              | ----              | ----              | ----              | ----              | ----              | -    |
| Monodelphis                 | ----               | ----              | ----              | ----              | ----              | ----              | ----              | -    |
| Consensus                   | ----               | ----              | ----              | ----              | ----              | ----              | ----              | -    |
| Conservation                | 100%               | 0%                | 0%                | 0%                | 0%                | 0%                | 0%                | -    |

|                             | 4,000      | 4,020      | 4,040      | 4,060       |            |            |            |      |
|-----------------------------|------------|------------|------------|-------------|------------|------------|------------|------|
| Dipodomys_ordii             | -----      | -----      | -----      | -----       | -          |            |            |      |
| Laurasiatheria              | -----      | -----      | -----      | -----       | -          |            |            |      |
| Eutheria                    | -----      | -----      | -----      | -----       | -          |            |            |      |
| Tarsius_syrichta            | -----      | -----      | -----      | -----       | -          |            |            |      |
| Muridae                     | -----      | -----      | -----      | -----       | -          |            |            |      |
| Gasterosteus_aculeatus      | -----      | -----      | -----      | -----       | -          |            |            |      |
| Felis_silvestris            | -----      | -----      | -----      | -----       | -          |            |            |      |
| Rattus                      | -----      | -----      | -----      | -----       | -          |            |            |      |
| Papio_hamadryas             | AAAGGCAGCG | AGTCCTCCTG | GAAGCCCAGG | AAAAATGTGCC | GGGGCCTGGA | GGCCTTCCAA | CCCAGCTCCC | 1373 |
| Pan_troglodytes             | -----      | -----      | -----      | -----       | -----      | -----      | -----      | -    |
| Ailuropoda_melanoleuca      | -----      | -----      | -----      | -----       | -----      | -----      | -----      | -    |
| Cavia_porcellus             | -----      | -----      | -----      | -----       | -----      | -----      | -----      | -    |
| Ictidomys_tridecemlineatus  | -----      | -----      | -----      | -----       | -----      | -----      | -----      | -    |
| Canis                       | -----      | -----      | -----      | -----       | -----      | -----      | -----      | -    |
| Felis_catus                 | -----      | -----      | -----      | -----       | -----      | -----      | -----      | -    |
| Ochotona_princeps           | -----      | -----      | -----      | -----       | -----      | -----      | -----      | -    |
| Cercopithecidae             | -----      | -----      | -----      | -----       | -----      | -----      | -----      | -    |
| Carnivora                   | -----      | -----      | -----      | -----       | -----      | -----      | -----      | -    |
| Mus                         | -----      | -----      | -----      | -----       | -----      | -----      | -----      | -    |
| Mus_musculus                | -----      | -----      | -----      | -----       | -----      | -----      | -----      | -    |
| Rattus_norvegicus           | -----      | -----      | -----      | -----       | -----      | -----      | -----      | -    |
| Tursiops_truncatus          | -----      | -----      | -----      | -----       | -----      | -----      | -----      | -    |
| Procapra_capensis           | -----      | -----      | -----      | -----       | -----      | -----      | -----      | -    |
| Primates                    | -----      | -----      | -----      | -----       | -----      | -----      | -----      | -    |
| Echinops_telfairi           | -----      | -----      | -----      | -----       | -----      | -----      | -----      | -    |
| Sorex_araneus               | -----      | -----      | -----      | -----       | -----      | -----      | -----      | -    |
| Canidae                     | -----      | -----      | -----      | -----       | -----      | -----      | -----      | -    |
| Otolemur_garnettii          | -----      | -----      | -----      | -----       | -----      | -----      | -----      | -    |
| Gallus                      | -----      | -----      | -----      | -----       | -----      | -----      | -----      | -    |
| Callithrix_jacchus          | -----      | -----      | -----      | -----       | -----      | -----      | -----      | -    |
| Crocodylus_porosus          | -----      | -----      | -----      | -----       | -----      | -----      | -----      | -    |
| Erinaceus_europaeus         | -----      | -----      | -----      | -----       | -----      | -----      | -----      | -    |
| rnd-6_family-7426-LTR-ERV1  | -----      | -----      | -----      | -----       | -----      | -----      | -----      | -    |
| Esox_lucius                 | -----      | -----      | -----      | -----       | -----      | -----      | -----      | -    |
| Salmo_salar                 | -----      | -----      | -----      | -----       | -----      | -----      | -----      | -    |
| Didelphidae                 | -----      | -----      | -----      | -----       | -----      | -----      | -----      | -    |
| Latimeria_chalumnae         | -----      | -----      | -----      | -----       | -----      | -----      | -----      | -    |
| Monodelphis_domestica       | -----      | -----      | -----      | -----       | -----      | -----      | -----      | -    |
| Macropus_eugenii            | -----      | -----      | -----      | -----       | -----      | -----      | -----      | -    |
| Alligator_mississippiensis  | -----      | -----      | -----      | -----       | -----      | -----      | -----      | -    |
| Chrysemys_picta_bellii      | -----      | -----      | -----      | -----       | -----      | -----      | -----      | -    |
| Danio_rerio                 | -----      | -----      | -----      | -----       | -----      | -----      | -----      | -    |
| Taeniopygia                 | -----      | -----      | -----      | -----       | -----      | -----      | -----      | -    |
| Dasyus_novemcinctus         | -----      | -----      | -----      | -----       | -----      | -----      | -----      | -    |
| LTR_XT                      | -----      | -----      | -----      | -----       | -----      | -----      | -----      | -    |
| Haplorrhini                 | GCAAAGCCTT | TATATGAGGC | GACCAAAGNG | GGGGAAAAGG  | AGCCCCTCCT | TTGGGGAAAA | GAACAGGACA | 4029 |
| Catarrhini                  | GCCAAACCTT | TGTACGGGGT | TACAAAGGGG | GGCGACGGGG  | AGCCTTTTGA | ATGGGGGCCT | CTACAACAGC | 3537 |
| Anolis_carolinensis         | GTTAAAAGCT | CAGTTTTGGT | TTCTTCGGTG | GGAGAAAATT  | GCTCCCCACG | GCATGGTTTG | GGGCGGTTGG | 124  |
| Murine_leukemia_virus       | GGGGCCCCCT | TGTACCCTCT | CACCAAAACG | GG-----GA   | CTCTGTTTAA | TTGGGGCCCA | GACCAGCAGA | 3500 |
| Phascolarctos_cinereus      | NCNGCNCNNN | TNTNCNNNNN | NANGAGANNA | AA-----GN   | NTCCCTTTAC | CTGGACTGAG | GCNCNCCAGN | 3399 |
| Estrildidae                 | -----      | -----      | -----      | -----       | -----      | -----      | -----      | -    |
| Xenopus_Silurana_tropicalis | -----      | -----      | -----      | -----       | -----      | -----      | -----      | -    |
| L_XT                        | CAANTNAAAA | CACCNCTTAT | GNCATNTATA | NTNANAGTTC  | TGACATAGTA | ATNTCACNGA | CGAACNAANN | 3538 |
| Takifugu_rubripes           | -----      | -----      | -----      | -----       | -----      | -----      | -----      | -    |
| Bos_taurus                  | -----      | -----      | -----      | -----       | -----      | -----      | -----      | -    |
| Homo_sapiens                | -----      | -----      | -----      | -----       | -----      | -----      | -----      | -    |
| Microcebus_murinus          | -----      | -----      | -----      | -----       | -----      | -----      | -----      | -    |
| Myotis_lucifugus            | -----      | -----      | -----      | -----       | -----      | -----      | -----      | -    |
| Equus_caballus              | -----      | -----      | -----      | -----       | -----      | -----      | -----      | -    |
| Tupaia_belangeri            | -----      | -----      | -----      | -----       | -----      | -----      | -----      | -    |
| Loxodonta_africana          | -----      | -----      | -----      | -----       | -----      | -----      | -----      | -    |
| Murinae                     | -----      | -----      | -----      | -----       | -----      | -----      | -----      | -    |
| Canis_lupus_familiaris      | -----      | -----      | -----      | -----       | -----      | -----      | -----      | -    |
| Sus_scrofa                  | -----      | -----      | -----      | -----       | -----      | -----      | -----      | -    |
| Choloepus_hoffmanni         | -----      | -----      | -----      | -----       | -----      | -----      | -----      | -    |
| Vicugna_pacos               | -----      | -----      | -----      | -----       | -----      | -----      | -----      | -    |
| Gavialis_gangeticus         | -----      | -----      | -----      | -----       | -----      | -----      | -----      | -    |
| Mammalia                    | -----      | -----      | -----      | -----       | -----      | -----      | -----      | -    |
| Passeroidea                 | -----      | -----      | -----      | -----       | -----      | -----      | -----      | -    |
| Takifugu                    | -----      | -----      | -----      | -----       | -----      | -----      | -----      | -    |
| Pteropus_vampyrus           | -----      | -----      | -----      | -----       | -----      | -----      | -----      | -    |
| Ornithorhynchus             | -----      | -----      | -----      | -----       | -----      | -----      | -----      | -    |
| Oryctolagus_cuniculus       | -----      | -----      | -----      | -----       | -----      | -----      | -----      | -    |
| Gallus_gallus               | -----      | -----      | -----      | -----       | -----      | -----      | -----      | -    |
| Hominidae                   | TCAAGGAAGG | TTGGGGGACG | CCCCTCCTG  | ACCTTGAATC  | TCCCGCCTCA | GGACAATGGG | AGGTGCCCAA | 325  |
| Metatheria                  | -----      | -----      | -----      | -----       | -----      | -----      | -----      | -    |
| Rodentia                    | -----      | -----      | -----      | -----       | -----      | -----      | -----      | -    |
| Monodelphis                 | -----      | -----      | -----      | -----       | -----      | -----      | -----      | -    |
| Consensus                   | -----      | -----      | -----      | -----       | -----      | -----      | -----      | -    |
| Conservation                | 100%       | -----      | -----      | -----       | -----      | -----      | -----      | 0%   |

|                             | 4,080         | 4,100      | 4,120      |            |               |            |            |      |
|-----------------------------|---------------|------------|------------|------------|---------------|------------|------------|------|
| Dipodomys_ordii             |               |            |            |            |               |            |            |      |
| Laurasiatheria              |               |            |            |            |               |            |            |      |
| Eutheria                    |               |            |            |            |               |            |            |      |
| Tarsius_syrichta            |               |            |            |            |               |            |            |      |
| Muridae                     |               |            |            |            |               |            |            |      |
| Gasterosteus_aculeatus      |               |            |            |            |               |            |            |      |
| Felis_silvestris            |               |            |            |            |               |            |            |      |
| Rattus                      |               |            |            |            |               |            |            |      |
| Papio_hamadryas             | CAATGAAATA    | GACGAGGGAT | TTCCCTCAC  | CCGCCCGGAC | TGGGATTATG    | AGACAGCACC | GGGTAGGGAG | 1443 |
| Pan_troglodytes             |               |            |            |            |               |            |            |      |
| Ailuropoda_melanoleuca      |               |            |            |            |               |            |            |      |
| Cavia_porcellus             |               |            |            |            |               |            |            |      |
| Ictidomys_tridecemlineatus  |               |            |            |            |               |            |            |      |
| Canis                       |               |            |            |            |               |            |            |      |
| Felis_catus                 |               |            |            |            |               |            |            |      |
| Ochotona_princeps           |               |            |            |            |               |            |            |      |
| Cercopithecidae             |               |            |            |            |               |            |            |      |
| Carnivora                   |               |            |            |            |               |            |            |      |
| Mus                         |               |            |            |            |               |            |            |      |
| Mus_musculus                |               |            |            |            |               |            |            |      |
| Rattus_norvegicus           |               |            |            |            |               |            |            |      |
| Tursiops_truncatus          |               |            |            |            |               |            |            |      |
| Procapra_capensis           |               |            |            |            |               |            |            |      |
| Primates                    |               |            |            |            |               |            |            |      |
| Echinops_telfairi           |               |            |            |            |               |            |            |      |
| Sorex_araneus               |               |            |            |            |               |            |            |      |
| Canidae                     |               |            |            |            |               |            |            |      |
| Otomur_garnettii            |               |            |            |            |               |            |            |      |
| Gallus                      |               |            |            |            |               |            |            |      |
| Callithrix_jacchus          |               |            |            |            |               |            |            |      |
| Crocodylus_porosus          |               |            |            |            |               |            |            |      |
| Erinaceus_europaeus         |               |            |            |            |               |            |            |      |
| rnd-6_family-7426-LTR-ERV1  |               |            |            |            |               |            |            |      |
| Esox_lucius                 |               |            |            |            |               |            |            |      |
| Salmo_salar                 |               |            |            |            |               |            |            |      |
| Didelphidae                 |               |            |            |            |               |            |            |      |
| Latimeria_chalumnae         |               |            |            |            |               |            |            |      |
| Monodelphis_domestica       |               |            |            |            |               |            |            |      |
| Macropus_eugenii            |               |            |            |            |               |            |            |      |
| Alligator_mississippiensis  |               |            |            |            |               |            |            |      |
| Chrysemys_picta_bellii      |               |            |            |            |               |            |            |      |
| Danio_rerio                 |               |            |            |            |               |            |            |      |
| Taeniopygia                 |               |            |            |            |               |            |            |      |
| Dasyus_novemcinctus         |               |            |            |            |               |            |            |      |
| LTR_XT                      |               |            |            |            |               |            |            |      |
| Haplorrhini                 | TGGCTT - - TC | AAGGAAATCA | AGAAAGCTTT | AATCCAGGCC | CC - - AGCACT | AGGGCTGCCA | GACATGACAA | 4095 |
| Catarrhini                  | AAGCCT - - TT | TGTAAGTTAA | AGGAAAAATT | TATGTCGGCC | CC - - AGCCCT | AGGACTACCA | GATTTGACAA | 3603 |
| Anolis_carolinensis         | TGGTCCAAC     | TGTGCCCTA  | AGGCACAGGG | ATTGGCGAGC | TTTAAAAGCT    | TTTCCCGCTT | GGGCCGANTT | 194  |
| Murine_leukemia_virus       | GGGCCT - - AT | CAAGAAATCA | AACAGGCCCT | CCTGACTGCC | CC - - CGCCCT | GGGATTGCCA | GACTTGACCA | 3566 |
| Phascolarctos_cinereus      | NAGCCT - - NT | NGNNGNNTNA | NAGAGGCCCT | GCTATCGGCC | CN - - CGCCCN | NGNNCTNNNN | NNNCTCANNA | 3465 |
| Estrildidae                 |               |            |            |            |               |            |            |      |
| Xenopus_Silurana_tropicalis |               |            |            |            |               |            |            |      |
| L_XT                        | NNTGNAGTNN    | ACCCGTNNA  | GATTTGTAGC | TCNANNAACA | NTCTTACATN    | AAATTNGACA | TTATANGCAA | 3608 |
| Takifugu_rubripes           |               |            |            |            |               |            |            |      |
| Bos_taurus                  |               |            |            |            |               |            |            |      |
| Homo_sapiens                |               |            |            |            |               |            |            |      |
| Microcebus_murinus          |               |            |            |            |               |            |            |      |
| Myotis_lucifugus            |               |            |            |            |               |            |            |      |
| Equus_caballus              |               |            |            |            |               |            |            |      |
| Tupaia_belangeri            |               |            |            |            |               |            |            |      |
| Loxodonta_africana          |               |            |            |            |               |            |            |      |
| Murinae                     |               |            |            |            |               |            |            |      |
| Canis_lupus_familiaris      |               |            |            |            |               |            |            |      |
| Sus_scrofa                  |               |            |            |            |               |            |            |      |
| Choloepus_hoffmanni         |               |            |            |            |               |            |            |      |
| Vicugna_pacos               |               |            |            |            |               |            |            |      |
| Gavialis_gangeticus         |               |            |            |            |               |            |            |      |
| Mammalia                    |               |            |            |            |               |            |            |      |
| Passeroidea                 |               |            |            |            |               |            |            |      |
| Takifugu                    |               |            |            |            |               |            |            |      |
| Pteropus_vampyrus           |               |            |            |            |               |            |            |      |
| Ornithorhynchus             |               |            |            |            |               |            |            |      |
| Oryctolagus_cuniculus       |               |            |            |            |               |            |            |      |
| Gallus_gallus               |               |            |            |            |               |            |            |      |
| Hominidae                   | TCCAAAACCT    | CCCTGACCTT | GAATCGCCCG | CCTCAGGACA | ATGGGAGGTG    | CCCAATCCAA | AATTGATCCT | 395  |
| Metatheria                  |               |            |            |            |               |            |            |      |
| Rodentia                    |               |            |            |            |               |            |            |      |
| Monodelphis                 |               |            |            |            |               |            |            |      |
| Consensus                   |               |            |            |            |               |            |            |      |
| Conservation                | 100%          |            |            |            |               |            |            | 0%   |

|                             | 4,140               | 4,160             | 4,180             | 4,200               |                   |                   |                          |       |
|-----------------------------|---------------------|-------------------|-------------------|---------------------|-------------------|-------------------|--------------------------|-------|
| Dipodomys_ordii             | -----               | -----             | -----             | -----               | -----             |                   |                          |       |
| Laurasiatheria              | -----               | -----             | -----             | -----               | -----             |                   |                          |       |
| Eutheria                    | -----               | -----             | -----             | -----               | -----             |                   |                          |       |
| Tarsius_syrichta            | -----               | -----             | -----             | -----               | -----             |                   |                          |       |
| Muridae                     | -----               | -----             | -----             | -----               | -----             |                   |                          |       |
| Gasterosteus_aculeatus      | -----               | -----             | -----             | -----               | -----             |                   |                          |       |
| Felis_silvestris            | -----               | -----             | -----             | -----               | -----             |                   |                          |       |
| Rattus                      | -----               | -----             | -----             | -----               | -----             |                   |                          |       |
| Papio_hamadryas             | <b>AGTCTCCGAA</b>   | <b>TCTATCGCCA</b> | <b>GGCTCTGTTG</b> | <b>GCGGGTCTCA</b>   | <b>AGGGGGCAGG</b> | <b>AAAACGCCCC</b> | <b>ACCAATTTGG</b>        | 1513  |
| Pan_troglodytes             | -----               | -----             | -----             | -----               | -----             | -----             | -----                    | ----- |
| Ailuropoda_melanoleuca      | -----               | -----             | -----             | -----               | -----             | -----             | -----                    | ----- |
| Cavia_porcellus             | -----               | -----             | -----             | -----               | -----             | -----             | -----                    | ----- |
| Ictidomys_tridecemlineatus  | -----               | -----             | -----             | -----               | -----             | -----             | -----                    | ----- |
| Canis                       | -----               | -----             | -----             | -----               | -----             | -----             | -----                    | ----- |
| Felis_catus                 | -----               | -----             | -----             | -----               | -----             | -----             | -----                    | ----- |
| Ochotona_princeps           | -----               | -----             | -----             | -----               | -----             | -----             | -----                    | ----- |
| Cercopithecidae             | -----               | -----             | -----             | -----               | -----             | -----             | -----                    | ----- |
| Carnivora                   | -----               | -----             | -----             | -----               | -----             | -----             | -----                    | ----- |
| Mus                         | -----               | -----             | -----             | -----               | -----             | -----             | -----                    | ----- |
| Mus_musculus                | -----               | -----             | -----             | -----               | -----             | -----             | -----                    | ----- |
| Rattus_norvegicus           | -----               | -----             | -----             | -----               | -----             | -----             | -----                    | ----- |
| Tursiops_truncatus          | -----               | -----             | -----             | -----               | -----             | -----             | -----                    | ----- |
| Procapra_capensis           | -----               | -----             | -----             | -----               | -----             | -----             | -----                    | ----- |
| Primates                    | -----               | -----             | -----             | -----               | -----             | -----             | -----                    | ----- |
| Echinops_telfairi           | -----               | -----             | -----             | -----               | -----             | -----             | -----                    | ----- |
| Sorex_araneus               | -----               | -----             | -----             | -----               | -----             | -----             | -----                    | ----- |
| Canidae                     | -----               | -----             | -----             | -----               | -----             | -----             | -----                    | ----- |
| Otomur_garnettii            | -----               | -----             | -----             | -----               | -----             | -----             | -----                    | ----- |
| Gallus                      | -----               | -----             | -----             | -----               | -----             | -----             | -----                    | ----- |
| Callithrix_jacchus          | -----               | -----             | -----             | -----               | -----             | -----             | -----                    | ----- |
| Crocodylus_porosus          | -----               | -----             | -----             | -----               | -----             | -----             | -----                    | ----- |
| Erinaceus_europaeus         | -----               | -----             | -----             | -----               | -----             | -----             | -----                    | ----- |
| rnd-6_family-7426-LTR-ERV1  | -----               | -----             | -----             | -----               | -----             | -----             | -----                    | ----- |
| Esox_lucius                 | -----               | -----             | -----             | -----               | -----             | -----             | -----                    | ----- |
| Salmo_salar                 | -----               | -----             | -----             | -----               | -----             | -----             | -----                    | ----- |
| Didelphidae                 | -----               | -----             | -----             | -----               | -----             | -----             | -----                    | ----- |
| Latimeria_chalumnae         | -----               | -----             | -----             | -----               | -----             | -----             | -----                    | ----- |
| Monodelphis_domestica       | -----               | -----             | -----             | -----               | -----             | -----             | -----                    | ----- |
| Macropus_eugenii            | -----               | -----             | -----             | -----               | -----             | -----             | -----                    | ----- |
| Alligator_mississippiensis  | -----               | -----             | -----             | -----               | -----             | -----             | -----                    | ----- |
| Chrysemys_picta_bellii      | -----               | -----             | -----             | -----               | -----             | -----             | -----                    | ----- |
| Danio_rerio                 | -----               | -----             | -----             | -----               | -----             | -----             | -----                    | ----- |
| Taeniopygia                 | -----               | -----             | -----             | -----               | -----             | -----             | -----                    | ----- |
| Dasyus_novemcinctus         | -----               | -----             | -----             | -----               | -----             | -----             | -----                    | ----- |
| LTR_XT                      | -----               | -----             | -----             | -----               | -----             | -----             | -----                    | ----- |
| Haplorrhini                 | <b>AGCC - -CTTT</b> | <b>TACCTGTATG</b> | <b>TTCATGAAAG</b> | <b>AAAAGAAATG</b>   | <b>GCTACAGGAG</b> | <b>TCTTAGTGCA</b> | <b>AATGCTAGGG</b>        | 4163  |
| Catarrhini                  | <b>AGCC - -CTTT</b> | <b>ACACTCTATG</b> | <b>TGTCAGAAAG</b> | <b>AGAAAAAATG</b>   | <b>GCAGTTGGAG</b> | <b>TTTTAACCCA</b> | <b>GACTGTGGGG</b>        | 3671  |
| Anolis_carolinensis         | <b>GGACAACCTC</b>   | <b>TANNTGTATG</b> | <b>TNGGAGAACG</b> | <b>A - ANGGAGTG</b> | <b>GCAGTAGGAG</b> | <b>TATTGACTCA</b> | <b>G - - - - - - - -</b> | 254   |
| Murine_leukemia_virus       | <b>AGCC - -CTTT</b> | <b>GAACTCTTTG</b> | <b>TCGACGAGAA</b> | <b>GCAGGGCTAC</b>   | <b>GCCAAAGGCG</b> | <b>TCCTAACGCA</b> | <b>GAAACTGGGA</b>        | 3634  |
| Phascolarctos_cinereus      | <b>ANCC - -NNTT</b> | <b>GCTNTNTNCN</b> | <b>TNNNNNNNNN</b> | <b>NGNNNGNGTT</b>   | <b>GNNCNGGGN</b>  | <b>NGNTTNCTCA</b> | <b>ANNNCNNNGN</b>        | 3533  |
| Estrildidae                 | -----               | -----             | -----             | -----               | -----             | -----             | -----                    | ----- |
| Xenopus_Silurana_tropicalis | -----               | -----             | -----             | -----               | -----             | -----             | -----                    | ----- |
| LTR_XT                      | <b>ANTATGANTT</b>   | <b>TGCGTTNTGT</b> | <b>NCANGAGAAG</b> | <b>GGTAAGCGAT</b>   | <b>TGTCTNNAGT</b> | <b>CCNNGCACAN</b> | <b>AAGAAAGGNG</b>        | 3678  |
| Takifugu_rubripes           | -----               | -----             | -----             | -----               | -----             | -----             | -----                    | ----- |
| Bos_taurus                  | -----               | -----             | -----             | -----               | -----             | -----             | -----                    | ----- |
| Homo_sapiens                | -----               | -----             | -----             | -----               | -----             | -----             | -----                    | ----- |
| Microcebus_murinus          | -----               | -----             | -----             | -----               | -----             | -----             | -----                    | ----- |
| Myotis_lucifugus            | -----               | -----             | -----             | -----               | -----             | -----             | -----                    | ----- |
| Equus_caballus              | -----               | -----             | -----             | -----               | -----             | -----             | -----                    | ----- |
| Tupaia_belangeri            | -----               | -----             | -----             | -----               | -----             | -----             | -----                    | ----- |
| Loxodonta_africana          | -----               | -----             | -----             | -----               | -----             | -----             | -----                    | ----- |
| Murinae                     | -----               | -----             | -----             | -----               | -----             | -----             | -----                    | ----- |
| Canis_lupus_familiaris      | -----               | -----             | -----             | -----               | -----             | -----             | -----                    | ----- |
| Sus_scrofa                  | -----               | -----             | -----             | -----               | -----             | -----             | -----                    | ----- |
| Choloepus_hoffmanni         | -----               | -----             | -----             | -----               | -----             | -----             | -----                    | ----- |
| Vicugna_pacos               | -----               | -----             | -----             | -----               | -----             | -----             | -----                    | ----- |
| Gavialis_gangeticus         | -----               | -----             | -----             | -----               | -----             | -----             | -----                    | ----- |
| Mammalia                    | -----               | -----             | -----             | -----               | -----             | -----             | -----                    | ----- |
| Passeroidea                 | -----               | -----             | -----             | -----               | -----             | -----             | -----                    | ----- |
| Takifugu                    | -----               | -----             | -----             | -----               | -----             | -----             | -----                    | ----- |
| Pteropus_vampyrus           | -----               | -----             | -----             | -----               | -----             | -----             | -----                    | ----- |
| Ornithorhynchus             | -----               | -----             | -----             | -----               | -----             | -----             | -----                    | ----- |
| Oryctolagus_cuniculus       | -----               | -----             | -----             | -----               | -----             | -----             | -----                    | ----- |
| Gallus_gallus               | -----               | -----             | -----             | -----               | -----             | -----             | -----                    | ----- |
| Hominidae                   | <b>AAGACACCCC</b>   | <b>TGGGGTGTCT</b> | <b>CCTAGCCAAC</b> | <b>TTTGAAGCTC</b>   | <b>TAGGCCTCAG</b> | <b>TATGGACCTT</b> | <b>AAGCGGAAGC</b>        | 465   |
| Metatheria                  | -----               | -----             | -----             | -----               | -----             | -----             | -----                    | ----- |
| Rodentia                    | -----               | -----             | -----             | -----               | -----             | -----             | -----                    | ----- |
| Monodelphis                 | -----               | -----             | -----             | -----               | -----             | -----             | -----                    | ----- |
| Consensus                   | -----               | -----             | -----             | -----               | -----             | -----             | -----                    | ----- |
| Conservation                | 100%                | -----             | -----             | -----               | -----             | -----             | -----                    | 0%    |



|                             | 4,220      |            | 4,240      |            | 4,260      |            |                 |
|-----------------------------|------------|------------|------------|------------|------------|------------|-----------------|
| Dipodomys_ordii             | -----      | -----      | -----      | -----      | -----      | -----      | -----           |
| Laurasiatheria              | -----      | -----      | -----      | -----      | -----      | -----      | -----           |
| Eutheria                    | -----      | -----      | -----      | -----      | -----      | -----      | -----           |
| Tarsius_syrichta            | -----      | -----      | -----      | -----      | -----      | -----      | -----           |
| Muridae                     | -----      | -----      | -----      | -----      | -----      | -----      | -----           |
| Gasterosteus_aculeatus      | -----      | -----      | -----      | -----      | -----      | -----      | -----           |
| Felis_silvestris            | -----      | -----      | -----      | -----      | -----      | -----      | -----           |
| Rattus                      | -----      | -----      | -----      | -----      | -----      | -----      | -----           |
| Papio_hamadryas             | CCAAGGTAAG | GACTATAACT | CAGGGAAAAG | ATGAAAGCCC | GGCAGCCTTT | ATGGAAAGAC | TTCTGGAAGG 1583 |
| Pan_troglodytes             | -----      | -----      | -----      | -----      | -----      | -----      | -----           |
| Ailuropoda_melanoleuca      | -----      | -----      | -----      | -----      | -----      | -----      | -----           |
| Cavia_porcellus             | -----      | -----      | -----      | -----      | -----      | -----      | -----           |
| Ictidomys_tridecemlineatus  | -----      | -----      | -----      | -----      | -----      | -----      | -----           |
| Canis                       | -----      | -----      | -----      | -----      | -----      | -----      | -----           |
| Felis_catus                 | -----      | -----      | -----      | -----      | -----      | -----      | -----           |
| Ochotona_princeps           | -----      | -----      | -----      | -----      | -----      | -----      | -----           |
| Cercopithecidae             | -----      | -----      | -----      | -----      | -----      | -----      | -----           |
| Carnivora                   | -----      | -----      | -----      | -----      | -----      | -----      | -----           |
| Mus                         | -----      | -----      | -----      | -----      | -----      | -----      | -----           |
| Mus_musculus                | -----      | -----      | -----      | -----      | -----      | -----      | -----           |
| Rattus_norvegicus           | -----      | -----      | -----      | -----      | -----      | -----      | -----           |
| Tursiops_truncatus          | -----      | -----      | -----      | -----      | -----      | -----      | -----           |
| Procapra_capensis           | -----      | -----      | -----      | -----      | -----      | -----      | -----           |
| Primates                    | -----      | -----      | -----      | -----      | -----      | -----      | -----           |
| Echinops_telfairi           | -----      | -----      | -----      | -----      | -----      | -----      | -----           |
| Sorex_araneus               | -----      | -----      | -----      | -----      | -----      | -----      | -----           |
| Canidae                     | -----      | -----      | -----      | -----      | -----      | -----      | -----           |
| Otolemur_garnettii          | -----      | -----      | -----      | -----      | -----      | -----      | -----           |
| Gallus                      | -----      | -----      | -----      | -----      | -----      | -----      | -----           |
| Callithrix_jacchus          | -----      | -----      | -----      | -----      | -----      | -----      | -----           |
| Crocodylus_porosus          | -----      | -----      | -----      | -----      | -----      | -----      | -----           |
| Erinaceus_europaeus         | -----      | -----      | -----      | -----      | -----      | -----      | -----           |
| rnd-6_family-7426-LTR-ERV1  | -----      | -----      | -----      | -----      | -----      | -----      | -----           |
| Esox_lucius                 | -----      | -----      | -----      | -----      | -----      | -----      | -----           |
| Salmo_salar                 | -----      | -----      | -----      | -----      | -----      | -----      | -----           |
| Didelphidae                 | -----      | -----      | -----      | -----      | -----      | -----      | -----           |
| Latimeria_chalumnae         | -----      | -----      | -----      | -----      | -----      | -----      | -----           |
| Monodelphis_domestica       | -----      | -----      | -----      | -----      | -----      | -----      | -----           |
| Macropus_eugenii            | -----      | -----      | -----      | -----      | -----      | -----      | -----           |
| Alligator_mississippiensis  | -----      | -----      | -----      | -----      | -----      | -----      | -----           |
| Chrysemys_picta_bellii      | -----      | -----      | -----      | -----      | -----      | -----      | -----           |
| Danio_rerio                 | -----      | -----      | -----      | -----      | -----      | -----      | -----           |
| Taeniopygia                 | -----      | -----      | -----      | -----      | -----      | -----      | -----           |
| Dasybus_novemcinctus        | -----      | -----      | -----      | -----      | -----      | -----      | -----           |
| LTR_XT                      | -----      | -----      | -----      | -----      | -----      | -----      | -----           |
| Haplorrhini                 | TCATGGTATC | GGCCTGTAGC | ATATTTGTCC | AAGCAACTGG | ACTTGGTGGC | TACGGGATGG | CCACCCTGTT 4233 |
| Catarrhini                  | CCCTGGCCAA | GGCAGTGGC  | CTATCTCTCA | AAACAAGTAG | ATGGGGTTTC | CAAAGGCTGG | CCACCATGTC 3741 |
| Anolis_carolinensis         | --CTAGGTGC | AGCCAGT-GC | TTACTTGTCT | AAGCAANTGG | ACAACGTGGC | CCGTGGATGG | CC-CCNTGCN 320  |
| Murine_leukemia_virus       | CCTTGGCGCC | GGCCTGTGGC | CTACCTGTCC | AAAAAGCTGG | ACCCAGTGGC | AGCCGGGTGG | CCCCCTGCC 3704  |
| Phascolarctos_cinereus      | NCNNNNCGAN | NNNNGGNNNC | TTNCNTGTCA | AAAAAATTAG | ATCCGGTGGC | CAGTGGGTGG | CCAACTTGCC 3603 |
| Estrildidae                 | -----      | -----      | -----      | -----      | -----      | -----      | -----           |
| Xenopus_Silurana_tropicalis | -----      | -----      | -----      | -----      | -----      | -----      | -----           |
| LTR_XT                      | ACAATCCCAN | NACNGTNGGA | TATTCCATNG | CGGAGTTAGN | NGCTATTGCN | GCAGCCCTAA | CTGNTTGTAG 3748 |
| Takifugu_rubripes           | -----      | -----      | -----      | -----      | -----      | -----      | -----           |
| Bos_taurus                  | -----      | -----      | -----      | -----      | -----      | -----      | -----           |
| Homo_sapiens                | -----      | -----      | -----      | -----      | -----      | -----      | -----           |
| Microcebus_murinus          | -----      | -----      | -----      | -----      | -----      | -----      | -----           |
| Myotis_lucifugus            | -----      | -----      | -----      | -----      | -----      | -----      | -----           |
| Equus_caballus              | -----      | -----      | -----      | -----      | -----      | -----      | -----           |
| Tupaia_belangeri            | -----      | -----      | -----      | -----      | -----      | -----      | -----           |
| Loxodonta_africana          | -----      | -----      | -----      | -----      | -----      | -----      | -----           |
| Murinae                     | -----      | -----      | -----      | -----      | -----      | -----      | -----           |
| Canis_lupus_familiaris      | -----      | -----      | -----      | -----      | -----      | -----      | -----           |
| Sus_scrofa                  | -----      | -----      | -----      | -----      | -----      | -----      | -----           |
| Choloepus_hoffmanni         | -----      | -----      | -----      | -----      | -----      | -----      | -----           |
| Vicugna_pacos               | -----      | -----      | -----      | -----      | -----      | -----      | -----           |
| Gavialis_gangeticus         | -----      | -----      | -----      | -----      | -----      | -----      | -----           |
| Mammalia                    | -----      | -----      | -----      | -----      | -----      | -----      | -----           |
| Passeroidea                 | -----      | -----      | -----      | -----      | -----      | -----      | -----           |
| Takifugu                    | -----      | -----      | -----      | -----      | -----      | -----      | -----           |
| Pteropus_vampyrus           | -----      | -----      | -----      | -----      | -----      | -----      | -----           |
| Ornithorhynchus             | -----      | -----      | -----      | -----      | -----      | -----      | -----           |
| Oryctolagus_cuniculus       | -----      | -----      | -----      | -----      | -----      | -----      | -----           |
| Gallus_gallus               | -----      | -----      | -----      | -----      | -----      | -----      | -----           |
| Hominidae                   | GACTCATTTT | CTTTTGTCTG | GTCGTTGGC  | CGCAATACAA | ATTGGACAAC | CAATCTCGGT | GGCCGCCCGA 535  |
| Metatheria                  | -----      | -----      | -----      | -----      | -----      | -----      | -----           |
| Rodentia                    | -----      | -----      | -----      | -----      | -----      | -----      | -----           |
| Monodelphis                 | -----      | -----      | -----      | -----      | -----      | -----      | -----           |
| Consensus                   | -----      | -----      | -----      | -----      | -----      | -----      | -----           |
| Conservation                | 100%       | -----      | -----      | -----      | -----      | -----      | -----           |
|                             | 0%         | -----      | -----      | -----      | -----      | -----      | -----           |

|                             | 4,280             | 4,300             | 4,320             | 4,340              |                   |                   |                   |      |
|-----------------------------|-------------------|-------------------|-------------------|--------------------|-------------------|-------------------|-------------------|------|
| Dipodomys_ordii             | -----             | -----             | -----             | -----              | -                 |                   |                   |      |
| Laurasiatheria              | -----             | -----             | -----             | -----              | -                 |                   |                   |      |
| Eutheria                    | -----             | -----             | -----             | -----              | -                 |                   |                   |      |
| Tarsius_syrichtha           | -----             | -----             | -----             | -----              | -                 |                   |                   |      |
| Muridae                     | -----             | -----             | -----             | -----              | -                 |                   |                   |      |
| Gasterosteus_aculeatus      | -----             | -----             | -----             | -----              | -                 |                   |                   |      |
| Felis_silvestris            | -----             | -----             | -----             | -----              | -                 |                   |                   |      |
| Rattus                      | -----             | -----             | -----             | -----              | -                 |                   |                   |      |
| Papio_hamadryas             | <b>GTTTCGAATG</b> | <b>TATACTCCAT</b> | <b>TTGATCCAGA</b> | <b>AGCACCCAGAA</b> | <b>CACAAGGCTA</b> | <b>CCGTGGCCAT</b> | <b>GTCGTTTATA</b> | 1653 |
| Pan_troglodytes             | -----             | -----             | -----             | -----              | -                 |                   |                   |      |
| Ailuropoda_melanoleuca      | -----             | -----             | -----             | -----              | -                 |                   |                   |      |
| Cavia_porcellus             | -----             | -----             | -----             | -----              | -                 |                   |                   |      |
| Ictidomys_tridecemlineatus  | -----             | -----             | -----             | -----              | -                 |                   |                   |      |
| Canis                       | -----             | -----             | -----             | -----              | -                 |                   |                   |      |
| Felis_catus                 | -----             | -----             | -----             | -----              | -                 |                   |                   |      |
| Ochotona_princeps           | -----             | -----             | -----             | -----              | -                 |                   |                   |      |
| Cercopithecidae             | -----             | -----             | -----             | -----              | -                 |                   |                   |      |
| Carnivora                   | -----             | -----             | -----             | -----              | -                 |                   |                   |      |
| Mus                         | -----             | -----             | -----             | -----              | -                 |                   |                   |      |
| Mus_musculus                | -----             | -----             | -----             | -----              | -                 |                   |                   |      |
| Rattus_norvegicus           | -----             | -----             | -----             | -----              | -                 |                   |                   |      |
| Tursiops_truncatus          | -----             | -----             | -----             | -----              | -                 |                   |                   |      |
| Procyon_capensis            | -----             | -----             | -----             | -----              | -                 |                   |                   |      |
| Primates                    | -----             | -----             | -----             | -----              | -                 |                   |                   |      |
| Echinops_telfairi           | -----             | -----             | -----             | -----              | -                 |                   |                   |      |
| Sorex_araneus               | -----             | -----             | -----             | -----              | -                 |                   |                   |      |
| Canidae                     | -----             | -----             | -----             | -----              | -                 |                   |                   |      |
| Otomur_garnettii            | -----             | -----             | -----             | -----              | -                 |                   |                   |      |
| Gallus                      | -----             | -----             | -----             | -----              | -                 |                   |                   |      |
| Callithrix_jacchus          | -----             | -----             | -----             | -----              | -                 |                   |                   |      |
| Crocodylus_porosus          | -----             | -----             | -----             | -----              | -                 |                   |                   |      |
| Erinaceus_europaeus         | -----             | -----             | -----             | -----              | -                 |                   |                   |      |
| rnd-6_family-7426-LTR-ERV1  | -----             | -----             | -----             | -----              | -                 |                   |                   |      |
| Esox_lucius                 | -----             | -----             | -----             | -----              | -                 |                   |                   |      |
| Salmo_salar                 | -----             | -----             | -----             | -----              | -                 |                   |                   |      |
| Didelphidae                 | -----             | -----             | -----             | -----              | -                 |                   |                   |      |
| Latimeria_chalumnae         | -----             | -----             | -----             | -----              | -                 |                   |                   |      |
| Monodelphis_domestica       | -----             | -----             | -----             | -----              | -                 |                   |                   |      |
| Macropus_eugenii            | -----             | -----             | -----             | -----              | -                 |                   |                   |      |
| Alligator_mississippiensis  | -----             | -----             | -----             | -----              | -                 |                   |                   |      |
| Chrysemys_picta_bellii      | -----             | -----             | -----             | -----              | -                 |                   |                   |      |
| Danio_rerio                 | -----             | -----             | -----             | -----              | -                 |                   |                   |      |
| Taeniopygia                 | -----             | -----             | -----             | -----              | -                 |                   |                   |      |
| Dasyus_novemcinctus         | -----             | -----             | -----             | -----              | -                 |                   |                   |      |
| LTR_XT                      | -----             | -----             | -----             | -----              | -                 |                   |                   |      |
| Haplorrhini                 | <b>TCAAGGCGCT</b> | <b>GGCCGCCACT</b> | <b>GCCTTGTTAG</b> | <b>CCGAGGATGC</b>  | <b>TAACAAGCTC</b> | <b>ACATTTGGAC</b> | <b>AGAAGCTGAT</b> | 4303 |
| Catarrhini                  | <b>TAAGGGCCCT</b> | <b>GGCAGCAACA</b> | <b>GCCCTGTTAG</b> | <b>CACAAGAAGC</b>  | <b>AGATAAACTA</b> | <b>ACCGTTGGGC</b> | <b>AAAACTGAA</b>  | 3811 |
| Anolis_carolinensis         | <b>TGAGAGCTGT</b> | <b>GGCTGCT-CT</b> | <b>GCTGTTCTTG</b> | <b>T-GAAGANGC</b>  | <b>AAANAA--TG</b> | <b>ACCTTAGGAC</b> | <b>AGC-CGTGAT</b> | 385  |
| Murine_leukemia_virus       | <b>TACGGATGGT</b> | <b>AGCAGCCATT</b> | <b>GCCGTTCTGA</b> | <b>CAAAGGATGC</b>  | <b>AGGCAAGCTA</b> | <b>ACTATGGGAC</b> | <b>AGCCGCTAGT</b> | 3774 |
| Phascolarctos_cinereus      | <b>TAAAAGCAAT</b> | <b>TGCGGCCGTA</b> | <b>GCACCTCTTC</b> | <b>TCAAGGACGC</b>  | <b>TGATAAGTTA</b> | <b>ACCTTAGGAC</b> | <b>AGAACGTGTT</b> | 3673 |
| Estrildidae                 | -----             | -----             | -----             | -----              | -                 |                   |                   |      |
| Xenopus_Silurana_tropicalis | -----             | -----             | -----             | -----              | -                 |                   |                   |      |
| LTR_XT                      | <b>AGAGTAGTAN</b> | <b>CAGCAGCAGC</b> | <b>CATAACTGTN</b> | <b>GAGNCTACTN</b>  | <b>NNGANNCACT</b> | <b>NNNACAATAT</b> | <b>AACCTNTTTG</b> | 3818 |
| Takifugu_rubripes           | -----             | -----             | -----             | -----              | -                 |                   |                   |      |
| Bos_taurus                  | -----             | -----             | -----             | -----              | -                 |                   |                   |      |
| Homo_sapiens                | -----             | -----             | -----             | -----              | -                 |                   |                   |      |
| Microcebus_murinus          | -----             | -----             | -----             | -----              | -                 |                   |                   |      |
| Myotis_lucifugus            | -----             | -----             | -----             | -----              | -                 |                   |                   |      |
| Equus_caballus              | -----             | -----             | -----             | -----              | -                 |                   |                   |      |
| Tupaia_belangeri            | -----             | -----             | -----             | -----              | -                 |                   |                   |      |
| Loxodonta_africana          | -----             | -----             | -----             | -----              | -                 |                   |                   |      |
| Murinae                     | -----             | -----             | -----             | -----              | -                 |                   |                   |      |
| Canis_lupus_familiaris      | -----             | -----             | -----             | -----              | -                 |                   |                   |      |
| Sus_scrofa                  | -----             | -----             | -----             | -----              | -                 |                   |                   |      |
| Choloepus_hoffmanni         | -----             | -----             | -----             | -----              | -                 |                   |                   |      |
| Vicugna_pacos               | -----             | -----             | -----             | -----              | -                 |                   |                   |      |
| Gavialis_gangeticus         | -----             | -----             | -----             | -----              | -                 |                   |                   |      |
| Mammalia                    | -----             | -----             | -----             | -----              | -                 |                   |                   |      |
| Passeroidea                 | -----             | -----             | -----             | -----              | -                 |                   |                   |      |
| Takifugu                    | -----             | -----             | -----             | -----              | -                 |                   |                   |      |
| Pteropus_vampyrus           | -----             | -----             | -----             | -----              | -                 |                   |                   |      |
| Ornithorhynchus             | -----             | -----             | -----             | -----              | -                 |                   |                   |      |
| Oryctolagus_cuniculus       | -----             | -----             | -----             | -----              | -                 |                   |                   |      |
| Gallus_gallus               | -----             | -----             | -----             | -----              | -                 |                   |                   |      |
| Hominidae                   | <b>AGGAACTTTC</b> | <b>GATTTCCAAA</b> | <b>TTTTACAGGA</b> | <b>CCTAGACAAC</b>  | <b>CTTTGCAGAA</b> | <b>GACAAGGCAA</b> | <b>ATGGTCAGAG</b> | 605  |
| Metatheria                  | -----             | -----             | -----             | -----              | -                 |                   |                   |      |
| Rodentia                    | -----             | -----             | -----             | -----              | -                 |                   |                   |      |
| Monodelphis                 | -----             | -----             | -----             | -----              | -                 |                   |                   |      |
| Consensus                   | -----             | -----             | -----             | -----              | -                 |                   |                   |      |
| Conservation                | 100%              | -----             | -----             | -----              | -----             | -----             | -----             | 0%   |

|                             | 4,360        |            | 4,380          |               | 4,400      |            |                 |
|-----------------------------|--------------|------------|----------------|---------------|------------|------------|-----------------|
| Dipodomys_ordii             |              |            |                |               |            |            |                 |
| Laurasiatheria              |              |            |                |               |            |            |                 |
| Eutheria                    |              |            |                |               |            |            |                 |
| Tarsius_syrichtha           |              |            |                |               |            |            |                 |
| Muridae                     |              |            |                |               |            |            |                 |
| Gasterosteus_aculeatus      |              |            |                |               |            |            |                 |
| Felis_silvestris            |              |            |                |               |            |            |                 |
| Rattus                      |              |            |                |               |            |            |                 |
| Papio_hamadryas             | GATCAGGCAG   | CACTAGACAT | AAAAGGAAAA     | CTCCAAGGC     | TAGACGGGAT | CCAAACTCAT | GGGCTGCAGG 1723 |
| Pan_troglodytes             |              |            |                |               |            |            |                 |
| Ailuropoda_melanoleuca      |              |            |                |               |            |            |                 |
| Cavia_porcellus             |              |            |                |               |            |            |                 |
| Ictidomys_tridecemlineatus  |              |            |                |               |            |            |                 |
| Canis                       |              |            |                |               |            |            |                 |
| Felis_catus                 |              |            |                |               |            |            |                 |
| Ochotona_princeps           |              |            |                |               |            |            |                 |
| Cercopithecidae             |              |            |                |               |            |            |                 |
| Carnivora                   |              |            |                |               |            |            |                 |
| Mus                         |              |            |                |               |            |            |                 |
| Mus_musculus                |              |            |                |               |            |            |                 |
| Rattus_norvegicus           |              |            |                |               |            |            |                 |
| Tursiops_truncatus          |              |            |                |               |            |            |                 |
| Procapra_capensis           |              |            |                |               |            |            |                 |
| Primates                    |              |            |                |               |            |            |                 |
| Echinops_telfairi           |              |            |                |               |            |            |                 |
| Sorex_araneus               |              |            |                |               |            |            |                 |
| Canidae                     |              |            |                |               |            |            |                 |
| Otolemur_garnettii          |              |            |                |               |            |            |                 |
| Gallus                      |              |            |                |               |            |            |                 |
| Callithrix_jacchus          |              |            |                |               |            |            |                 |
| Crocodylus_porosus          |              |            |                |               |            |            |                 |
| Erinaceus_europaeus         |              |            |                |               |            |            |                 |
| rnd-6_family-7426-LTR-ERV1  |              |            |                |               |            |            |                 |
| Esox_lucius                 |              |            |                |               |            |            |                 |
| Salmo_salar                 |              |            |                |               |            |            |                 |
| Didelphidae                 |              |            |                |               |            |            |                 |
| Latimeria_chalumnae         |              |            |                |               |            |            |                 |
| Monodelphis_domestica       |              |            |                |               |            |            |                 |
| Macropus_eugenii            |              |            |                |               |            |            |                 |
| Alligator_mississippiensis  |              |            |                |               |            |            |                 |
| Chrysemys_picta_bellii      |              |            |                |               |            |            |                 |
| Danio_rerio                 |              |            |                |               |            |            |                 |
| Taeniopygia                 |              |            |                |               |            |            |                 |
| Dasybus_novemcinctus        |              |            |                |               |            |            |                 |
| LTR_XT                      |              |            |                |               |            |            |                 |
| Haplorrhini                 | AATTCAGGTG   | CCCCACACAG | TTGTCACCCT     | GATGGAACAG    | AGAGGACATC | GTTGGCTCTC | TAACCCTAGG 4373 |
| Catarrhini                  | TATAAAGGCC   | CCCGATGCTG | TGGTAACTTT     | GATGAATACC    | AAAGGACATC | ATTGGCTAAC | AAATGCTAGA 3881 |
| Anolis_carolinensis         | TTTAAAGG - - | CCCGATGCGG | TAGTG - - - CT | TATGGA - - AT | AGNGGACACC | ACTGGCTCAC | CAATANNCGT 448  |
| Murine_leukemia_virus       | CATCCTGGCC   | CCCGATGCGG | TAGAGGCAT      | GGTCAAGCAA    | CCCCCTGACC | GCTGGCTATC | CAACGCCCGC 3844 |
| Phascolarctos_cinereus      | GGTGATTGCA   | CCTCACAAAC | TGGAAGCAT      | TGTGAGACAG    | CCCCCGACC  | GATGGATGAC | AAATGCCAGG 3743 |
| Estrildidae                 |              |            |                |               |            |            |                 |
| Xenopus_Silurana_tropicalis |              |            |                |               |            |            |                 |
| L_XT                        | TAGATGGGCA   | ANCAAACNNT | ACAANNNTG      | TTGATNNACN    | GNTTGACANA | ACATTCCNNT | TTATTCGTGA 3888 |
| Takifugu_rubripes           |              |            |                |               |            |            |                 |
| Bos_taurus                  |              |            |                |               |            |            |                 |
| Homo_sapiens                |              |            |                |               |            |            |                 |
| Microcebus_murinus          |              |            |                |               |            |            |                 |
| Myotis_lucifugus            |              |            |                |               |            |            |                 |
| Equus_caballus              |              |            |                |               |            |            |                 |
| Tupaia_belangeri            |              |            |                |               |            |            |                 |
| Loxodonta_africana          |              |            |                |               |            |            |                 |
| Murinae                     |              |            |                |               |            |            |                 |
| Canis_lupus_familiaris      |              |            |                |               |            |            |                 |
| Sus_scrofa                  |              |            |                |               |            |            |                 |
| Choloepus_hoffmanni         |              |            |                |               |            |            |                 |
| Vicugna_pacos               |              |            |                |               |            |            |                 |
| Gavialis_gangeticus         |              |            |                |               |            |            |                 |
| Mammalia                    |              |            |                |               |            |            |                 |
| Passeroidea                 |              |            |                |               |            |            |                 |
| Takifugu                    |              |            |                |               |            |            |                 |
| Pteropus_vampyrus           |              |            |                |               |            |            |                 |
| Ornithorhynchus             |              |            |                |               |            |            |                 |
| Oryctolagus_cuniculus       |              |            |                |               |            |            |                 |
| Gallus_gallus               |              |            |                |               |            |            |                 |
| Hominidae                   | GTCCTTATG    | TACAAGCCTT | TTGGACCTA      | CGCTCTCGTC    | CTGACCTATG | TGCCAAGTGT | TCCCTTGGAC 675  |
| Metatheria                  |              |            |                |               |            |            |                 |
| Rodentia                    |              |            |                |               |            |            |                 |
| Monodelphis                 |              |            |                |               |            |            |                 |
| Consensus                   |              |            |                |               |            |            |                 |
| Conservation                | 100%         |            |                |               |            |            | 0%              |

|                             | 4,420       | 4,440      | 4,460      | 4,480      |             |             |            |      |
|-----------------------------|-------------|------------|------------|------------|-------------|-------------|------------|------|
| Dipodomys_ordii             | ----        | ----       | ----       | ----       | -           |             |            |      |
| Laurasiatheria              | ----        | ----       | ----       | ----       | -           |             |            |      |
| Eutheria                    | ----        | ----       | ----       | ----       | -           |             |            |      |
| Tarsius_syrichta            | ----        | ----       | ----       | ----       | -           |             |            |      |
| Muridae                     | ----        | ----       | ----       | ----       | -           |             |            |      |
| Gasterosteus_aculeatus      | ----        | ----       | ----       | ----       | -           |             |            |      |
| Felis_silvestris            | ----        | ----       | ----       | ----       | -           |             |            |      |
| Rattus                      | ----        | ----       | ----       | ----       | -           |             |            |      |
| Papio_hamadryas             | AATTAGTAAG  | GGAGGCAGAA | AAGGTATACA | ATAAAAGGGA | AACCCAGAA   | GAAAGAGAAG  | CTAGGCTTAT | 1793 |
| Pan_troglodytes             | ----        | ----       | ----       | ----       | -           |             |            |      |
| Ailuropoda_melanoleuca      | ----        | ----       | ----       | ----       | -           |             |            |      |
| Cavia_porcellus             | ----        | ----       | ----       | ----       | -           |             |            |      |
| Ictidomys_tridecemlineatus  | ----        | ----       | ----       | ----       | -           |             |            |      |
| Canis                       | ----        | ----       | ----       | ----       | -           |             |            |      |
| Felis_catus                 | ----        | ----       | ----       | ----       | -           |             |            |      |
| Ochotona_princeps           | ----        | ----       | ----       | ----       | -           |             |            |      |
| Cercopithecidae             | ----        | ----       | ----       | ----       | -           |             |            |      |
| Carnivora                   | ----        | ----       | ----       | ----       | -           |             |            |      |
| Mus                         | ----        | ----       | ----       | ----       | -           |             |            |      |
| Mus_musculus                | ----        | ----       | ----       | ----       | -           |             |            |      |
| Rattus_norvegicus           | ----        | ----       | ----       | ----       | -           |             |            |      |
| Tursiops_truncatus          | ----        | ----       | ----       | ----       | -           |             |            |      |
| Procapra_capensis           | ----        | ----       | ----       | ----       | -           |             |            |      |
| Primates                    | ----        | ----       | ----       | ----       | -           |             |            |      |
| Echinops_telfairi           | ----        | ----       | ----       | ----       | -           |             |            |      |
| Sorex_araneus               | ----        | ----       | ----       | ----       | -           |             |            |      |
| Canidae                     | ----        | ----       | ----       | ----       | -           |             |            |      |
| Otomomys_garnettii          | ----        | ----       | ----       | ----       | -           |             |            |      |
| Gallus                      | ----        | ----       | ----       | ----       | -           |             |            |      |
| Callithrix_jacchus          | ----        | ----       | ----       | ----       | -           |             |            |      |
| Crocodylus_porosus          | ----        | ----       | ----       | ----       | -           |             |            |      |
| Erinaceus_europaeus         | ----        | ----       | ----       | ----       | -           |             |            |      |
| rnd-6_family-7426-LTR-ERV1  | ----        | ----       | ----       | ----       | -           |             |            |      |
| Esox_lucius                 | ----        | ----       | ----       | ----       | -           |             |            |      |
| Salmo_salar                 | ----        | ----       | ----       | ----       | -           |             |            |      |
| Didelphidae                 | ----        | ----       | ----       | ----       | -           |             |            |      |
| Latimeria_chalumnae         | ----        | ----       | ----       | ----       | -           |             |            |      |
| Monodelphis_domestica       | ----        | ----       | ----       | ----       | -           |             |            |      |
| Macropus_eugenii            | ----        | ----       | ----       | ----       | -           |             |            |      |
| Alligator_mississippiensis  | ----        | ----       | ----       | ----       | -           |             |            |      |
| Chrysemys_picta_bellii      | ----        | ----       | ----       | ----       | -           |             |            |      |
| Danio_rerio                 | ----        | ----       | ----       | ----       | -           |             |            |      |
| Taeniopygia                 | ----        | ----       | ----       | ----       | -           |             |            |      |
| Dasyus_novemcinctus         | ----        | ----       | ----       | ----       | -           |             |            |      |
| LTR_XT                      | ----        | ----       | ----       | ----       | -           |             |            |      |
| Haplorrhini                 | ATGCTAAGT   | ACCAAGGGCT | CCTATGTGAG | AATCCATACA | TCACC-TTAG  | AGACTGTGAA  | TACCCTAAAT | 4442 |
| Catarrhini                  | TTAACCAAGT  | ACCAAAGCTT | GCTATGTGAA | AATCCCGGCA | TAACCTATTGA | AGTCTGT-AA  | CACCGTAAAT | 3950 |
| Anolis_carolinensis         | NTGTTTTAAGT | ACGAGGGCTT | GCTGNTTGAC | AATCCACAGG | TCAATCTGCC  | ANTTTGN-AC  | NACTTTAAAT | 517  |
| Murine_leukemia_virus       | ATGACCCACT  | ACCAGGCAAT | GCTCCTAGAC | ACTGACCGAG | TTCAG-TTCG  | GACCCGGTGGT | GGCCCTCAAT | 3913 |
| Phascolarctos_cinereus      | ATGACCCATT  | ACCAAAGTCT | GCTGCTGAA- | -TGAGAGGG  | TGTCT-TTTG  | CGCCCCCGGC  | CATTCTGAAT | 3809 |
| Estrildidae                 | ----        | ----       | ----       | ----       | -           |             |            |      |
| Xenopus_Silurana_tropicalis | ----        | ----       | ----       | ----       | -           |             |            |      |
| LTR_XT                      | GAAACCNAATA | TTATGTTANG | CNATATATNG | GCAGTTAANT | NCNGTTGTNC  | CAGAACTGTN  | ACANATTGNA | 3958 |
| Takifugu_rubripes           | ----        | ----       | ----       | ----       | -           |             |            |      |
| Bos_taurus                  | ----        | ----       | ----       | ----       | -           |             |            |      |
| Homo_sapiens                | ----        | ----       | ----       | ----       | -           |             |            |      |
| Microcebus_murinus          | ----        | ----       | ----       | ----       | -           |             |            |      |
| Myotis_lucifugus            | ----        | ----       | ----       | ----       | -           |             |            |      |
| Equus_caballus              | ----        | ----       | ----       | ----       | -           |             |            |      |
| Tupaia_belangeri            | ----        | ----       | ----       | ----       | -           |             |            |      |
| Loxodonta_africana          | ----        | ----       | ----       | ----       | -           |             |            |      |
| Murinae                     | ----        | ----       | ----       | ----       | -           |             |            |      |
| Canis_lupus_familiaris      | ----        | ----       | ----       | ----       | -           |             |            |      |
| Sus_scrofa                  | ----        | ----       | ----       | ----       | -           |             |            |      |
| Choloepus_hoffmanni         | ----        | ----       | ----       | ----       | -           |             |            |      |
| Vicugna_pacos               | ----        | ----       | ----       | ----       | -           |             |            |      |
| Gavialis_gangeticus         | ----        | ----       | ----       | ----       | -           |             |            |      |
| Mammalia                    | ----        | ----       | ----       | ----       | -           |             |            |      |
| Passeroidea                 | ----        | ----       | ----       | ----       | -           |             |            |      |
| Takifugu                    | ----        | ----       | ----       | ----       | -           |             |            |      |
| Pteropus_vampyrus           | ----        | ----       | ----       | ----       | -           |             |            |      |
| Ornithorhynchus             | ----        | ----       | ----       | ----       | -           |             |            |      |
| Oryctolagus_cuniculus       | ----        | ----       | ----       | ----       | -           |             |            |      |
| Gallus_gallus               | ----        | ----       | ----       | ----       | -           |             |            |      |
| Hominidae                   | AGGTGTTACT  | GGCTAAGGCA | TCCCCTCTA  | ACAAAGAACC | TGATTCCTCC  | CCTCTCTCCG  | AGCCTCCTGA | 745  |
| Metatheria                  | ----        | ----       | ----       | ----       | -           |             |            |      |
| Rodentia                    | ----        | ----       | ----       | ----       | -           |             |            |      |
| Monodelphis                 | ----        | ----       | ----       | ----       | -           |             |            |      |
| Consensus                   | ----        | ----       | ----       | ----       | -           |             |            |      |
| Conservation                | 100%        | 0%         | 0%         | 0%         | 0%          | 0%          | 0%         | 0%   |

|                             | 4,500      | 4,520      | 4,540      |            |            |            |            |      |
|-----------------------------|------------|------------|------------|------------|------------|------------|------------|------|
| Dipodomys_ordii             |            |            |            |            |            |            |            |      |
| Laurasiatheria              |            |            |            |            |            |            |            |      |
| Eutheria                    |            |            |            |            |            |            |            |      |
| Tarsius_syricha             |            |            |            |            |            |            |            |      |
| Muridae                     |            |            |            |            |            |            |            |      |
| Gasterosteus_aculeatus      |            |            |            |            |            |            |            |      |
| Felis_silvestris            |            |            |            |            |            |            |            |      |
| Rattus                      |            |            |            |            |            |            |            |      |
| Papio_hamadryas             | AAAAGAACAG | GAAGAACGGG | AAGATCGGAG | AGACAGAAAA | AGAGATAAGC | ATTTAACCAA | AATCCTGGCA | 1863 |
| Pan_troglodytes             |            |            |            |            |            |            |            |      |
| Ailuropoda_melanoleuca      |            |            |            |            |            |            |            |      |
| Cavia_porcellus             |            |            |            |            |            |            |            |      |
| Ictidomys_tridecemlineatus  |            |            |            |            |            |            |            |      |
| Canis                       |            |            |            |            |            |            |            |      |
| Felis_catus                 |            |            |            |            |            |            |            |      |
| Ochotona_princeps           |            |            |            |            |            |            |            |      |
| Cercopithecidae             |            |            |            |            |            |            |            |      |
| Carnivora                   |            |            |            |            |            |            |            |      |
| Mus                         |            |            |            |            |            |            |            |      |
| Mus_musculus                |            |            |            |            |            |            |            |      |
| Rattus_norvegicus           |            |            |            |            |            |            |            |      |
| Tursiops_truncatus          |            |            |            |            |            |            |            |      |
| Procapra_capensis           |            |            |            |            |            |            |            |      |
| Primates                    |            |            |            |            |            |            |            |      |
| Echinops_telfairi           |            |            |            |            |            |            |            |      |
| Sorex_araneus               |            |            |            |            |            |            |            |      |
| Canidae                     |            |            |            |            |            |            |            |      |
| Otomur_garnettii            |            |            |            |            |            |            |            |      |
| Gallus                      |            |            |            |            |            |            |            |      |
| Callithrix_jacchus          |            |            |            |            |            |            |            |      |
| Crocodylus_porosus          |            |            |            |            |            |            |            |      |
| Erinaceus_europaeus         |            |            |            |            |            |            |            |      |
| rnd-6_family-7426-LTR-ERV1  |            |            |            |            |            |            |            |      |
| Esox_lucius                 |            |            |            |            |            |            |            |      |
| Salmo_salar                 |            |            |            |            |            |            |            |      |
| Didelphidae                 |            |            |            |            |            |            |            |      |
| Latimeria_chalumnae         |            |            |            |            |            |            |            |      |
| Monodelphis_domestica       |            |            |            |            |            |            |            |      |
| Macropus_eugenii            |            |            |            |            |            |            |            |      |
| Alligator_mississippiensis  |            |            |            |            |            |            |            |      |
| Chrysemys_picta_bellii      |            |            |            |            |            |            |            |      |
| Danio_rerio                 |            |            |            |            |            |            |            |      |
| Taeniopygia                 |            |            |            |            |            |            |            |      |
| Dasyus_novemcinctus         |            |            |            |            |            |            |            |      |
| LTR_XT                      |            |            |            |            |            |            |            |      |
| Haplorrhini                 | CCGGCCACAC | TGTTACCAAT | AGAATGTGCA | GAACATGGGA | AGCCCCGTT  | ATGTGCCCA  | GGGTACCACT | 4512 |
| Catarrhini                  | CCGGCCACCC | TGCTCCCAGT | A          | TCAGA      | GAGCCCGTC  | GAG        | CATA       | 3993 |
| Anolis_carolinensis         | CCTGCCACNT | TGTTGCCTGT | NGAA       | GAAGN      | AGAATNGATN | CNA        | CATG       | 563  |
| Murine_leukemia_virus       | CCTGCCACCT | TGCTCCCTCT | ACCG       | GAGAA      | AGGAGCCCC  |            | CATG       | 3956 |
| Phascolarctos_cinereus      | CCTGCCACCC | TGCTCCCCGT | AGAG       | TCAGA      | CGACACCCA  | ATA        | CACA       | 3855 |
| Estrildidae                 |            |            |            |            |            |            |            |      |
| Xenopus_Silurana_tropicalis |            |            |            |            |            |            |            |      |
| LTR_XT                      | TNCAGAAAT  | CTANTCACNA | TTGGNCACA  | TAGGANAGAN | AAANCTAANC | AAGATTATGN | ANGACAACAT | 4028 |
| Takifugu_rubripes           |            |            |            |            |            |            |            |      |
| Bos_taurus                  |            |            |            |            |            |            |            |      |
| Homo_sapiens                |            |            |            |            |            |            |            |      |
| Microcebus_murinus          |            |            |            |            |            |            |            |      |
| Myotis_lucifugus            |            |            |            |            |            |            |            |      |
| Equus_caballus              |            |            |            |            |            |            |            |      |
| Tupaia_belangeri            |            |            |            |            |            |            |            |      |
| Loxodonta_africana          |            |            |            |            |            |            |            |      |
| Murinae                     |            |            |            |            |            |            |            |      |
| Canis_lupus_familiaris      |            |            |            |            |            |            |            |      |
| Sus_scrofa                  |            |            |            |            |            |            |            |      |
| Choloepus_hoffmanni         |            |            |            |            |            |            |            |      |
| Vicugna_pacos               |            |            |            |            |            |            |            |      |
| Gavialis_gangeticus         |            |            |            |            |            |            |            |      |
| Mammalia                    |            |            |            |            |            |            |            |      |
| Passeroidea                 |            |            |            |            |            |            |            |      |
| Takifugu                    |            |            |            |            |            |            |            |      |
| Pteropus_vampyrus           |            |            |            |            |            |            |            |      |
| Ornithorhynchus             |            |            |            |            |            |            |            |      |
| Oryctolagus_cuniculus       |            |            |            |            |            |            |            |      |
| Gallus_gallus               |            |            |            |            |            |            |            |      |
| Hominidae                   | AGCCCTCGCT | TTACCACCAT | TGCCAGCGGC | GCTCCCTCCT | CCCTATCCAG | GATCCTCTGG | CCCCACCCA  | 815  |
| Metatheria                  |            |            |            |            |            |            |            |      |
| Rodentia                    |            |            |            |            |            |            |            |      |
| Monodelphis                 |            |            |            |            |            |            |            |      |
| Consensus                   |            |            |            |            |            |            |            |      |
| Conservation                | 100%       |            |            |            |            |            |            | 0%   |

|                             | 4,560             | 4,580             | 4,600             | 4,620             |                    |                   |                     |      |
|-----------------------------|-------------------|-------------------|-------------------|-------------------|--------------------|-------------------|---------------------|------|
| Dipodomys_ordii             | -----             | -----             | -----             | -----             | -                  |                   |                     |      |
| Laurasiatheria              | -----             | -----             | -----             | -----             | -                  |                   |                     |      |
| Eutheria                    | -----             | -----             | -----             | -----             | -                  |                   |                     |      |
| Tarsius_syricha             | -----             | -----             | -----             | -----             | -                  |                   |                     |      |
| Muridae                     | -----             | -----             | -----             | -----             | -                  |                   |                     |      |
| Gasterosteus_aculeatus      | -----             | -----             | -----             | -----             | -                  |                   |                     |      |
| Felis_silvestris            | -----             | -----             | -----             | -----             | -                  |                   |                     |      |
| Rattus                      | -----             | -----             | -----             | -----             | -                  |                   |                     |      |
| Papio_hamadryas             | <b>GCCGTAGTGA</b> | <b>CTGAAAAAAG</b> | <b>GGCAGGAAAG</b> | <b>TCAGGGGAAA</b> | <b>CAAGAAGCGG</b>  | <b>GCCTAAAGTA</b> | <b>GATAAGGACC</b>   | 1933 |
| Pan_troglodytes             | -----             | -----             | -----             | -----             | <b>G</b>           | <b>GCTCGTGCCC</b> | <b>CCGACCAGCG</b>   | 21   |
| Ailuropoda_melanoleuca      | -----             | -----             | -----             | -----             | -----              | -----             | -----               | -    |
| Cavia_porcellus             | -----             | -----             | -----             | -----             | -----              | -----             | -----               | -    |
| Ictidomys_tridecemlineatus  | -----             | -----             | -----             | -----             | -----              | -----             | -----               | -    |
| Canis                       | -----             | -----             | -----             | -----             | -----              | -----             | -----               | -    |
| Felis_catus                 | -----             | -----             | -----             | -----             | -----              | -----             | -----               | -    |
| Ochotona_princeps           | -----             | -----             | -----             | -----             | -----              | -----             | -----               | -    |
| Cercopithecidae             | -----             | -----             | -----             | -----             | -----              | -----             | -----               | -    |
| Carnivora                   | -----             | -----             | -----             | -----             | -----              | -----             | -----               | -    |
| Mus                         | -----             | -----             | -----             | -----             | -----              | -----             | -----               | -    |
| Mus_musculus                | -----             | -----             | -----             | -----             | -----              | -----             | -----               | -    |
| Rattus_norvegicus           | -----             | -----             | -----             | -----             | -----              | -----             | -----               | -    |
| Tursiops_truncatus          | -----             | -----             | -----             | -----             | -----              | -----             | -----               | -    |
| Procapra_capensis           | -----             | -----             | -----             | -----             | -----              | -----             | -----               | -    |
| Primates                    | -----             | -----             | -----             | -----             | -----              | -----             | -----               | -    |
| Echinops_telfairi           | -----             | -----             | -----             | -----             | -----              | -----             | -----               | -    |
| Sorex_araneus               | -----             | -----             | -----             | -----             | -----              | -----             | -----               | -    |
| Canidae                     | -----             | -----             | -----             | -----             | -----              | -----             | -----               | -    |
| Otomomys_garnettii          | -----             | -----             | -----             | -----             | -----              | -----             | -----               | -    |
| Gallus                      | -----             | -----             | -----             | -----             | -----              | -----             | -----               | -    |
| Callithrix_jacchus          | -----             | -----             | -----             | -----             | -----              | -----             | -----               | -    |
| Crocodylus_porosus          | -----             | -----             | -----             | -----             | -----              | -----             | -----               | -    |
| Erinaceus_europaeus         | -----             | -----             | -----             | -----             | -----              | -----             | -----               | -    |
| rnd-6_family-7426-LTR-ERV1  | -----             | -----             | -----             | -----             | -----              | -----             | -----               | -    |
| Esox_lucius                 | -----             | -----             | -----             | -----             | -----              | -----             | -----               | -    |
| Salmo_salar                 | -----             | -----             | -----             | -----             | -----              | -----             | -----               | -    |
| Didelphidae                 | -----             | -----             | -----             | -----             | -----              | -----             | -----               | -    |
| Latimeria_chalumnae         | -----             | -----             | -----             | -----             | -----              | -----             | -----               | -    |
| Monodelphis_domestica       | -----             | -----             | -----             | -----             | -----              | -----             | -----               | -    |
| Macropus_eugenii            | -----             | -----             | -----             | -----             | -----              | -----             | -----               | -    |
| Alligator_mississippiensis  | -----             | -----             | -----             | -----             | -----              | -----             | -----               | -    |
| Chrysemys_picta_bellii      | -----             | -----             | -----             | -----             | -----              | -----             | -----               | -    |
| Danio_rerio                 | -----             | -----             | -----             | -----             | -----              | -----             | -----               | -    |
| Taeniopygia                 | -----             | -----             | -----             | -----             | -----              | -----             | -----               | -    |
| Dasyus_novemcinctus         | -----             | -----             | -----             | -----             | -----              | -----             | -----               | -    |
| LTR_XT                      | -----             | -----             | -----             | -----             | -----              | -----             | -----               | -    |
| Haplorrhini                 | <b>GCTGTGTAGA</b> | <b>AACAGTGGAT</b> | <b>GAAGTCTTTT</b> | <b>CAAGCCGGGA</b> | <b>AGACTTAAAG</b>  | <b>GATCAACCCT</b> | <b>TAAAAGACCC</b>   | 4582 |
| Catarrhini                  | <b>ACCGTGTAGA</b> | <b>GGTGTGGAC</b>  | <b>TCAGTCTATT</b> | <b>CTAGCAGACC</b> | <b>TGACCTTCGG</b>  | <b>GACCAGCCAT</b> | <b>GGGCATCAGT</b>   | 4063 |
| Anolis_carolinensis         | <b>ATTGTTTAGA</b> | <b>ANTGATNGAT</b> | <b>GAAGTGTACT</b> | <b>CNAGTNGGCC</b> | <b>NGATCTGAAA</b>  | <b>NATNTGCCAC</b> | <b>TTCCA - AGGC</b> | 632  |
| Murine_leukemia_virus       | <b>ATTGCCTCGA</b> | <b>GATCTTGGCT</b> | <b>AAAACGCATG</b> | <b>GAACCAGACC</b> | <b>GGACCTCACC</b>  | <b>GACCAGCCCA</b> | <b>TCCCAGACGC</b>   | 4026 |
| Phascolarctos_cinereus      | <b>TATGCTCAGA</b> | <b>AATCCTTGCC</b> | <b>GAGGAGACAG</b> | <b>GAACCCGACC</b> | <b>TGATCTGAGA</b>  | <b>GATCAGCCGT</b> | <b>TGCCCGGGT</b>    | 3925 |
| Estrildidae                 | -----             | -----             | -----             | -----             | -----              | -----             | -----               | -    |
| Xenopus_Silurana_tropicalis | -----             | -----             | -----             | -----             | -----              | -----             | -----               | -    |
| LTR_XT                      | <b>GTNATGGAAN</b> | <b>ACAATNAAAG</b> | <b>NTACTGTNAA</b> | <b>NCAGGTATAN</b> | <b>GNTTANTGTT</b>  | <b>TGACNTGTGC</b> | <b>NNAANTAAAT</b>   | 4098 |
| Takifugu_rubripes           | -----             | -----             | -----             | -----             | -----              | -----             | -----               | -    |
| Bos_taurus                  | -----             | -----             | -----             | -----             | -----              | -----             | -----               | -    |
| Homo_sapiens                | -----             | -----             | -----             | -----             | -----              | -----             | -----               | -    |
| Microcebus_murinus          | -----             | -----             | -----             | -----             | -----              | -----             | -----               | -    |
| Myotis_lucifugus            | -----             | -----             | -----             | -----             | -----              | -----             | -----               | -    |
| Equus_caballus              | -----             | -----             | -----             | -----             | -----              | -----             | -----               | -    |
| Tupaia_belangeri            | -----             | -----             | -----             | -----             | -----              | -----             | -----               | -    |
| Loxodonta_africana          | -----             | -----             | -----             | -----             | -----              | -----             | -----               | -    |
| Murinae                     | -----             | -----             | -----             | -----             | -----              | -----             | -----               | -    |
| Canis_lupus_familiaris      | -----             | -----             | -----             | -----             | -----              | -----             | -----               | -    |
| Sus_scrofa                  | -----             | -----             | -----             | -----             | -----              | -----             | -----               | -    |
| Choloepus_hoffmanni         | -----             | -----             | -----             | -----             | -----              | -----             | -----               | -    |
| Vicugna_pacos               | -----             | -----             | -----             | -----             | -----              | -----             | -----               | -    |
| Gavialis_gangeticus         | -----             | -----             | -----             | -----             | -----              | -----             | -----               | -    |
| Mammalia                    | -----             | -----             | -----             | -----             | -----              | -----             | -----               | -    |
| Passeroidea                 | -----             | -----             | -----             | -----             | -----              | -----             | -----               | -    |
| Takifugu                    | -----             | -----             | -----             | -----             | -----              | -----             | -----               | -    |
| Pteropus_vampyrus           | -----             | -----             | -----             | -----             | -----              | -----             | -----               | -    |
| Ornithorhynchus             | -----             | -----             | -----             | -----             | -----              | -----             | -----               | -    |
| Oryctolagus_cuniculus       | -----             | -----             | -----             | -----             | -----              | -----             | -----               | -    |
| Gallus_gallus               | -----             | -----             | -----             | -----             | -----              | -----             | -----               | -    |
| Hominidae                   | <b>ACGGCTCCTC</b> | <b>CGCTACCTCC</b> | <b>TACACCACCT</b> | <b>TCCTCTCCCG</b> | <b>CTAACCCCTCC</b> | <b>CGCTTCTGCT</b> | <b>CTGCCACCGC</b>   | 885  |
| Metatheria                  | -----             | -----             | -----             | -----             | -----              | -----             | -----               | -    |
| Rodentia                    | -----             | -----             | -----             | -----             | -----              | -----             | -----               | -    |
| Monodelphis                 | -----             | -----             | -----             | -----             | -----              | -----             | -----               | -    |
| Consensus                   | -----             | -----             | -----             | -----             | -----              | -----             | -----               | -    |
| Conservation                | 100%              | -----             | -----             | -----             | -----              | -----             | -----               | 0%   |

|                             | 4,640                                                                                    | 4,660 | 4,680 |   |
|-----------------------------|------------------------------------------------------------------------------------------|-------|-------|---|
| Dipodomys_ordii             | -----                                                                                    | ----- | ----- | - |
| Laurasiatheria              | -----                                                                                    | ----- | ----- | - |
| Eutheria                    | -----                                                                                    | ----- | ----- | - |
| Tarsius_syrichtha           | -----                                                                                    | ----- | ----- | - |
| Muridae                     | -----                                                                                    | ----- | ----- | - |
| Gasterosteus_aculeatus      | -----                                                                                    | ----- | ----- | - |
| Felis_silvestris            | -----                                                                                    | ----- | ----- | - |
| Rattus                      | -----                                                                                    | ----- | ----- | - |
| Papio_hamadryas             | AGTGCGCCTA CTGCAAAGAG CGAGGGCATT GGATCAAGGA CTGCCCAAG CGTCCTAGAG ACCAGAAGAA 2003         |       |       |   |
| Pan_troglodytes             | GCCGGCCGGG CGGCGTAGAT CTGGGGCGCT CAGCCGCTGG GTTGGGGAGG CGCCCCGGTG - - - GGGCAG 87        |       |       |   |
| Ailuropoda_melanoleuca      | -----                                                                                    | ----- | ----- | - |
| Cavia_porcellus             | -----                                                                                    | ----- | ----- | - |
| Ictidomys_tridecemlineatus  | -----                                                                                    | ----- | ----- | - |
| Canis                       | -----                                                                                    | ----- | ----- | - |
| Felis_catus                 | -----                                                                                    | ----- | ----- | - |
| Ochotona_princeps           | -----                                                                                    | ----- | ----- | - |
| Cercopithecidae             | -----                                                                                    | ----- | ----- | - |
| Carnivora                   | -----                                                                                    | ----- | ----- | - |
| Mus                         | -----                                                                                    | ----- | ----- | - |
| Mus_musculus                | -----                                                                                    | ----- | ----- | - |
| Rattus_norvegicus           | -----                                                                                    | ----- | ----- | - |
| Tursiops_truncatus          | -----                                                                                    | ----- | ----- | - |
| Procapra_capensis           | -----                                                                                    | ----- | ----- | - |
| Primates                    | -----                                                                                    | ----- | ----- | - |
| Echinops_telfairi           | -----                                                                                    | ----- | ----- | - |
| Sorex_araneus               | -----                                                                                    | ----- | ----- | - |
| Canidae                     | -----                                                                                    | ----- | ----- | - |
| Otomomys_garnettii          | -----                                                                                    | ----- | ----- | - |
| Gallus                      | -----                                                                                    | ----- | ----- | - |
| Callithrix_jacchus          | -----                                                                                    | ----- | ----- | - |
| Crocodylus_porosus          | -----                                                                                    | ----- | ----- | - |
| Erinaceus_europaeus         | -----                                                                                    | ----- | ----- | - |
| rnd-6_family-7426-LTR-ERV1  | -----                                                                                    | ----- | ----- | - |
| Esox_lucius                 | -----                                                                                    | ----- | ----- | - |
| Salmo_salar                 | -----                                                                                    | ----- | ----- | - |
| Didelphidae                 | -----                                                                                    | ----- | ----- | - |
| Latimeria_chalumnae         | -----                                                                                    | ----- | ----- | - |
| Monodelphis_domestica       | -----                                                                                    | ----- | ----- | - |
| Macropus_eugenii            | -----                                                                                    | ----- | ----- | - |
| Alligator_mississippiensis  | -----                                                                                    | ----- | ----- | - |
| Chrysemys_picta_bellii      | -----                                                                                    | ----- | ----- | - |
| Danio_rerio                 | -----                                                                                    | ----- | ----- | - |
| Taeniopygia                 | -----                                                                                    | ----- | ----- | - |
| Dasyus_novemcinctus         | -----                                                                                    | ----- | ----- | - |
| LTR_XT                      | -----                                                                                    | ----- | ----- | - |
| Haplorrhini                 | AGATGTTGAA TATTTTACTG ATGGAAGCAG CTTTCAT - - AT CCG - AGGTA TCAGAAAGGC CAGATATGCC 4649   |       |       |   |
| Catarrhini                  | AGACTGGGAG TTATACGTGG ACGGGAGCAG CTTTCATCAAC CCACAAGGAG AAAGATGTGC AGGATATGCC 4133       |       |       |   |
| Anolis_carolinensis         | AGACTGGNTN TTTTNNACAG ATGNNCTAG NNGTAT - - GG TNA - NTNGCG AAAGGTAAGC GGGGTATGCA 699     |       |       |   |
| Murine_leukemia_virus       | CGACCACACC TGGTATACCG ATGGGAGCAG CTTTTT - - G CAAGAAGGAC AGCGAAAAGC TGGGGCAGCC 4093      |       |       |   |
| Phascolarctos_cinereus      | - - ACC - CGCT TGGTATACCG ATGGCAGCAG TTTTCAT - - C ATGGATGGCA GCGGACAAAG AGGTGCTGCC 3989 |       |       |   |
| Estrildidae                 | -----                                                                                    | ----- | ----- | - |
| Xenopus_Silurana_tropicalis | -----                                                                                    | ----- | ----- | - |
| L_XT                        | CTATGTGCNN ANGGTNAAG AACTTTNCAA CATCCTGCTC CTGCAGACNG ANTTTGGTNN NCTNTNNNA 4168          |       |       |   |
| Takifugu_rubripes           | -----                                                                                    | ----- | ----- | - |
| Bos_taurus                  | -----                                                                                    | ----- | ----- | - |
| Homo_sapiens                | -----                                                                                    | ----- | ----- | - |
| Microcebus_murinus          | -----                                                                                    | ----- | ----- | - |
| Myotis_lucifugus            | -----                                                                                    | ----- | ----- | - |
| Equus_caballus              | -----                                                                                    | ----- | ----- | - |
| Tupaia_belangeri            | -----                                                                                    | ----- | ----- | - |
| Loxodonta_africana          | -----                                                                                    | ----- | ----- | - |
| Murinae                     | -----                                                                                    | ----- | ----- | - |
| Canis_lupus_familiaris      | -----                                                                                    | ----- | ----- | - |
| Sus_scrofa                  | -----                                                                                    | ----- | ----- | - |
| Choloepus_hoffmanni         | -----                                                                                    | ----- | ----- | - |
| Vicugna_pacos               | -----                                                                                    | ----- | ----- | - |
| Gavialis_gangeticus         | -----                                                                                    | ----- | ----- | - |
| Mammalia                    | -----                                                                                    | ----- | ----- | - |
| Passeroidea                 | -----                                                                                    | ----- | ----- | - |
| Takifugu                    | -----                                                                                    | ----- | ----- | - |
| Pteropus_vampyrus           | -----                                                                                    | ----- | ----- | - |
| Ornithorhynchus             | -----                                                                                    | ----- | ----- | - |
| Oryctolagus_cuniculus       | -----                                                                                    | ----- | ----- | - |
| Gallus_gallus               | -----                                                                                    | ----- | ----- | - |
| Hominidae                   | CTTCCCCGT ATCTGCGCAC ACTCGGTCGA AGACGGACCT CTTGTGTCCG CTCGCTGAAG TTGCGGTGC 955           |       |       |   |
| Metatheria                  | -----                                                                                    | ----- | ----- | - |
| Rodentia                    | -----                                                                                    | ----- | ----- | - |
| Monodelphis                 | -----                                                                                    | ----- | ----- | - |
| Consensus                   | -----                                                                                    | ----- | ----- | - |
| Conservation                | 100%<br>0%                                                                               |       |       |   |

|                             | 4,700       | 4,720      | 4,740         | 4,760      |            |            |            |      |
|-----------------------------|-------------|------------|---------------|------------|------------|------------|------------|------|
| Dipodomys_ordii             | -----       | -----      | -----         | -----      | -          |            |            |      |
| Laurasiatheria              | -----       | -----      | -----         | -----      | -          |            |            |      |
| Eutheria                    | -----       | -----      | -----         | -----      | -          |            |            |      |
| Tarsius_syrichta            | -----       | -----      | -----         | -----      | -          |            |            |      |
| Muridae                     | -----       | -----      | -----         | -----      | -          |            |            |      |
| Gasterosteus_aculeatus      | -----       | -----      | -----         | -----      | -          |            |            |      |
| Felis_silvestris            | -----       | -----      | -----         | -----      | -          |            |            |      |
| Rattus                      | -----       | -----      | -----         | -----      | -          |            |            |      |
| Papio_hamadryas             | ACCCGCCCT   | GTCCTCACCT | TAGGTGAGGA    | CAGCGAATAG | GGGTGTCAGG | GCTCTGGAGC | CCCCCCGAG  | 2073 |
| Pan_troglodytes             | GCTTCTATCT  | GGCCGCCCTG | ACGGTTCCGG    | GCTCGATCCG | CTCCGGGGCA | GCTGCCGA   | -----CAGGG | 150  |
| Ailuropoda_melanoleuca      | -----       | -----      | -----         | -----      | -          |            |            |      |
| Cavia_porcellus             | -----       | -----      | -----         | -----      | -          |            |            |      |
| Ictidomys_tridecemlineatus  | -----       | -----      | -----         | -----      | -          |            |            |      |
| Canis                       | -----       | -----      | -----         | -----      | -          |            |            |      |
| Felis_catus                 | -----       | -----      | -----         | -----      | -          |            |            |      |
| Ochotona_princeps           | -----       | -----      | -----         | -----      | -          |            |            |      |
| Cercopithecidae             | -----       | -----      | -----         | -----      | -          |            |            |      |
| Carnivora                   | -----       | -----      | -----         | -----      | -          |            |            |      |
| Mus                         | -----       | -----      | -----         | -----      | -          |            |            |      |
| Mus_musculus                | -----       | -----      | -----         | -----      | -          |            |            |      |
| Rattus_norvegicus           | -----       | -----      | -----         | -----      | -          |            |            |      |
| Tursiops_truncatus          | -----       | -----      | -----         | -----      | -          |            |            |      |
| Procapra_capensis           | -----       | -----      | -----         | -----      | -          |            |            |      |
| Primates                    | -----       | -----      | -----         | -----      | -          |            |            |      |
| Echinops_telfairi           | -----       | -----      | -----         | -----      | -          |            |            |      |
| Sorex_araneus               | -----       | -----      | -----         | -----      | -          |            |            |      |
| Canidae                     | -----       | -----      | -----         | -----      | -          |            |            |      |
| Otomur_garnettii            | -----       | -----      | -----         | -----      | -          |            |            |      |
| Gallus                      | -----       | -----      | -----         | -----      | -          |            |            |      |
| Callithrix_jacchus          | -----       | -----      | -----         | -----      | -          |            |            |      |
| Crocodylus_porosus          | -----       | -----      | -----         | -----      | -          |            |            |      |
| Erinaceus_europaeus         | -----       | -----      | -----         | -----      | -          |            |            |      |
| rnd-6_family-7426-LTR-ERV1  | -----       | -----      | -----         | -----      | -          |            |            |      |
| Esox_lucius                 | -----       | -----      | -----         | -----      | -          |            |            |      |
| Salmo_salar                 | -----       | -----      | -----         | -----      | -          |            |            |      |
| Didelphidae                 | -----       | -----      | -----         | -----      | -          |            |            |      |
| Latimeria_chalumnae         | -----       | -----      | -----         | -----      | -          |            |            |      |
| Monodelphis_domestica       | -----       | -----      | -----         | -----      | -          |            |            |      |
| Macropus_eugenii            | -----       | -----      | -----         | -----      | -          |            |            |      |
| Alligator_mississippiensis  | -----       | -----      | -----         | -----      | -          |            |            |      |
| Chrysemys_picta_bellii      | -----       | -----      | -----         | -----      | -          |            |            |      |
| Danio_rerio                 | -----       | -----      | -----         | -----      | -          |            |            |      |
| Taeniopygia                 | -----       | -----      | -----         | -----      | -          |            |            |      |
| Dasyus_novemcinctus         | -----       | -----      | -----         | -----      | -          |            |            |      |
| LTR_XT                      | -----       | -----      | -----         | -----      | -          |            |            |      |
| Haplorrhini                 | GTAGTCACAT  | TAAGCTCGG- | - - - TGGCTGA | GGCCCGCCCC | CTACCGGTAG | GAACCTCAGC | GCAGAAGGCA | 4715 |
| Catarrhini                  | GTGGTAACTT  | TGGACGCTG- | - - - TCATTGA | AGCCAAACCG | TTGCCACAGG | GCACCTCAGC | CCAGAAGGCT | 4199 |
| Anolis_carolinensis         | GTGGT - GTT | AGAAGCTCGG | AGACCCTAGA    | GGCAAAGGN  | CTGCCTCCGG | GGACTTCCGC | TCAAAANGCC | 768  |
| Murine_leukemia_virus       | GTGACGACNG  | AGACCGAGG- | - - - TAATCTG | GGCGAGGGCC | CTGCCGGCTG | GAACGTCAGC | CCAGCGAGCC | 4159 |
| Phascolarctos_cinereus      | ATTGTGGACA  | ACAAGCGGA- | - - - CGGTGTG | GGCGAGCAAC | CTGCCAGAGG | GAACGTCAGC | TCAGAAGGCC | 4055 |
| Estrildidae                 | -----       | -----      | -----         | -----      | -          |            |            |      |
| Xenopus_Silurana_tropicalis | -----       | -----      | -----         | -----      | -          |            |            |      |
| L_XT                        | TCAATTATAN  | AGGNNCANTA | CAGTCAGGGA    | CTTATGGNCT | TAAGTACANA | CTNNTNNTAA | TGNACNTATT | 4238 |
| Takifugu_rubripes           | -----       | -----      | -----         | -----      | -          |            |            |      |
| Bos_taurus                  | -----       | -----      | -----         | -----      | -          |            |            |      |
| Homo_sapiens                | -----       | -----      | -----         | -----      | -          |            |            |      |
| Microcebus_murinus          | -----       | -----      | -----         | -----      | -          |            |            |      |
| Myotis_lucifugus            | -----       | -----      | -----         | -----      | -          |            |            |      |
| Equus_caballus              | -----       | -----      | -----         | -----      | -          |            |            |      |
| Tupaia_belangeri            | -----       | -----      | -----         | -----      | -          |            |            |      |
| Loxodonta_africana          | -----       | -----      | -----         | -----      | -          |            |            |      |
| Murinae                     | -----       | -----      | -----         | -----      | -          |            |            |      |
| Canis_lupus_familiaris      | -----       | -----      | -----         | -----      | -          |            |            |      |
| Sus_scrofa                  | -----       | -----      | -----         | -----      | -          |            |            |      |
| Choloepus_hoffmanni         | -----       | -----      | -----         | -----      | -          |            |            |      |
| Vicugna_pacos               | -----       | -----      | -----         | -----      | -          |            |            |      |
| Gavialis_gangeticus         | -----       | -----      | -----         | -----      | -          |            |            |      |
| Mammalia                    | -----       | -----      | -----         | -----      | -          |            |            |      |
| Passeroidea                 | -----       | -----      | -----         | -----      | -          |            |            |      |
| Takifugu                    | -----       | -----      | -----         | -----      | -          |            |            |      |
| Pteropus_vampyrus           | -----       | -----      | -----         | -----      | -          |            |            |      |
| Ornithorhynchus             | -----       | -----      | -----         | -----      | -          |            |            |      |
| Oryctolagus_cuniculus       | -----       | -----      | -----         | -----      | -          |            |            |      |
| Gallus_gallus               | -----       | -----      | -----         | -----      | -          |            |            |      |
| Hominidae                   | GGAAGGCGTG  | GTCAGGGTCC | ATGTTCCCTT    | TTCTCTTACT | GACTTATCTA | AAATAGAGAA | GCGGCTGGG  | 1025 |
| Metatheria                  | -----       | -----      | -----         | -----      | -          |            |            |      |
| Rodentia                    | -----       | -----      | -----         | -----      | -          |            |            |      |
| Monodelphis                 | -----       | -----      | -----         | -----      | -          |            |            |      |
| Consensus                   | -----       | -----      | -----         | -----      | -          |            |            |      |
| Conservation                | 100%        | -----      | -----         | -----      | -----      | -----      | -----      | 0%   |



|                             | 4,780      | 4,800       | 4,820      |            |            |            |            |      |
|-----------------------------|------------|-------------|------------|------------|------------|------------|------------|------|
| Dipodomys_ordii             |            |             |            |            |            |            |            |      |
| Laurasiatheria              |            |             |            |            |            |            |            |      |
| Eutheria                    |            |             |            |            |            |            |            |      |
| Tarsius_syrichtha           |            |             |            |            |            |            |            |      |
| Muridae                     |            |             |            |            |            |            |            |      |
| Gasterosteus_aculeatus      |            |             |            |            |            |            |            |      |
| Felis_silvestris            |            |             |            |            |            |            |            |      |
| Rattus                      |            |             |            |            |            |            |            |      |
| Papio_hamadryas             | CCCCGGCTAA | CTCTATCTGT  | AGGGGGGCAT | CCCACCACCT | TCTTGGTGGA | CACAGGGGCC | CAACACTCGG | 2143 |
| Pan_troglodytes             | CTGCAGGCTG | GATTCTTAGT  | AATCTTTTTT | GTTTCACATT | AGGAAGAAAA | TATAGGAGAC | CCGAACTCCT | 220  |
| Ailuropoda_melanoleuca      |            |             |            |            |            |            |            |      |
| Cavia_porcellus             |            |             |            |            |            |            |            |      |
| Ictidomys_tridecemlineatus  |            |             |            |            |            |            |            |      |
| Canis                       |            |             |            |            |            |            |            |      |
| Felis_catus                 |            |             |            |            |            |            |            |      |
| Ochotona_princeps           |            |             |            |            |            |            |            |      |
| Cercopithecidae             |            |             |            |            |            |            |            |      |
| Carnivora                   |            |             |            |            |            |            |            |      |
| Mus                         |            |             |            |            |            |            |            |      |
| Mus_musculus                |            |             |            |            |            |            |            |      |
| Rattus_norvegicus           |            |             |            |            |            |            |            |      |
| Tursiops_truncatus          |            |             |            |            |            |            |            |      |
| Procapra_capensis           |            |             |            |            |            |            |            |      |
| Primates                    |            |             |            |            |            |            |            |      |
| Echinops_telfairi           |            |             |            |            |            |            |            |      |
| Sorex_araneus               |            |             |            |            |            |            |            |      |
| Canidae                     |            |             |            |            |            |            |            |      |
| Otolemur_garnettii          |            |             |            |            |            |            |            |      |
| Gallus                      |            |             |            |            |            |            |            |      |
| Callithrix_jacchus          |            |             |            |            |            |            |            |      |
| Crocodylus_porosus          |            |             |            |            |            |            |            |      |
| Erinaceus_europaeus         |            |             |            |            |            |            |            |      |
| rnd-6_family-7426-LTR-ERV1  |            |             |            |            |            |            |            |      |
| Esox_lucius                 |            |             |            |            |            |            |            |      |
| Salmo_salar                 |            |             |            |            |            |            |            |      |
| Didelphidae                 |            |             |            |            |            |            |            |      |
| Latimeria_chalumnae         |            |             |            |            |            |            |            |      |
| Monodelphis_domestica       |            |             |            |            |            |            |            |      |
| Macropus_eugenii            |            |             |            |            |            |            |            |      |
| Alligator_mississippiensis  |            |             |            |            |            |            |            |      |
| Chrysemys_picta_bellii      |            |             |            |            |            |            |            |      |
| Danio_rerio                 |            |             |            |            |            |            |            |      |
| Taeniopygia                 |            |             |            |            |            |            |            |      |
| Dasyus_novemcinctus         |            |             |            |            |            |            |            |      |
| LTR_XT                      |            |             |            |            |            |            |            |      |
| Haplorrhini                 | GAACTAATAG | CTCTCACAAAG | AGCACTACTT | CTAGCGAAGG | GAAAGTCAGT | GAATATCTAT | ACTGACTCAA | 4785 |
| Catarrhini                  | GAGCTCATTG | CTTTAACTCG  | GGCTCTAGAA | CTCAGTGAAG | GTAAGACTGT | AAACATCTAC | ACTGACTCTC | 4269 |
| Anolis_carolinensis         | GAGTTGATTG | CTCTGACAAG  | NGCACTNGAA | TTGNCANAAG | GAAAAACAGT | TGATATTTAT | ACTGACTCNA | 838  |
| Murine_leukemia_virus       | GAAGTATCG  | CACTCACCCA  | AGCCCTGAAA | ATGGCAGAAG | GTAAGAAGCT | AAATGTTTAC | ACTGATAGCC | 4229 |
| Phascolarctos_cinereus      | GAACTAATCG | CCTTGACACA  | AGCATTACGC | TTGGCCGAAG | GAAAAAGCAT | CAACATCTAC | ACGGACAGCA | 4125 |
| Estrildidae                 |            |             |            |            |            |            |            |      |
| Xenopus_Silurana_tropicalis |            |             |            |            |            |            |            |      |
| LTR_XT                      | TANNTAATGN | ANANAAGGNA  | TGCCTGTTAN | GAANAATGAN | GCACANNCAA | CTATTAAGC  | TGTGTGAGAG | 4308 |
| Takifugu_rubripes           |            |             |            |            |            |            |            |      |
| Bos_taurus                  |            |             |            |            |            |            |            |      |
| Homo_sapiens                |            |             |            |            |            |            |            |      |
| Microcebus_murinus          |            |             |            |            |            |            |            |      |
| Myotis_lucifugus            |            |             |            |            |            |            |            |      |
| Equus_caballus              |            |             |            |            |            |            |            |      |
| Tupaia_belangeri            |            |             |            |            |            |            |            |      |
| Loxodonta_africana          |            |             |            |            |            |            |            |      |
| Murinae                     |            |             |            |            |            |            |            |      |
| Canis_lupus_familiaris      |            |             |            |            |            |            |            |      |
| Sus_scrofa                  |            |             |            |            |            |            |            |      |
| Choloepus_hoffmanni         |            |             |            |            |            |            |            |      |
| Vicugna_pacos               |            |             |            |            |            |            |            |      |
| Gavialis_gangeticus         |            |             |            |            |            |            |            |      |
| Mammalia                    |            |             |            |            |            |            |            |      |
| Passeroidea                 |            |             |            |            |            |            |            |      |
| Takifugu                    |            |             |            |            |            |            |            |      |
| Pteropus_vampyrus           |            |             |            |            |            |            |            |      |
| Ornithorhynchus             |            |             |            |            |            |            |            |      |
| Oryctolagus_cuniculus       |            |             |            |            |            |            |            |      |
| Gallus_gallus               |            |             |            |            |            |            |            |      |
| Hominidae                   | TCCTTCTCTG | CCAACCCAAC  | CCTGTATATC | AAACAATTTA | GGTACCTATG | CCAGGCTTAT | GACCTCACCT | 1095 |
| Metatheria                  |            |             |            |            |            |            |            |      |
| Rodentia                    |            |             |            |            |            |            |            |      |
| Monodelphis                 |            |             |            |            |            |            |            |      |
| Consensus                   |            |             |            |            |            |            |            |      |
| Conservation                |            |             |            |            |            |            |            |      |

|                             | 4,840      | 4,860       | 4,880      | 4,900      |            |             |             |      |
|-----------------------------|------------|-------------|------------|------------|------------|-------------|-------------|------|
| Dipodomys_ordii             | -----      | -----       | -----      | -----      | -          |             |             |      |
| Laurasiatheria              | -----      | -----       | -----      | -----      | -          |             |             |      |
| Eutheria                    | -----      | -----       | -----      | -----      | -          |             |             |      |
| Tarsius_syrichtha           | -----      | -----       | -----      | -----      | -          |             |             |      |
| Muridae                     | -----      | -----       | -----      | -----      | -          |             |             |      |
| Gasterosteus_aculeatus      | -----      | -----       | -----      | -----      | -          |             |             |      |
| Felis_silvestris            | -----      | -----       | -----      | -----      | -          |             |             |      |
| Rattus                      | -----      | -----       | -----      | -----      | -          |             |             |      |
| Papio_hamadryas             | TTTTGACCAA | GGCAAACGGA  | CCCCTGTCCT | CTCGTACATC | TTGGGTCCAG | GGGGCAACAG  | GAAGAAAGAT  | 2213 |
| Pan_troglodytes             | CTATCTCTCT | GATATTCGAG  | TTA--GGCAG | GGGCCAGATC | TGTTTAGAAA | TAGAAAAGGAA | AACTTGCTCC  | 288  |
| Ailuropoda_melanoleuca      | -----      | -----       | -----      | -----      | -          |             |             |      |
| Cavia_porcellus             | -----      | -----       | -----      | -----      | -          |             |             |      |
| Ictidomys_tridecemlineatus  | -----      | -----       | -----      | -----      | -          |             |             |      |
| Canis                       | -----      | -----       | -----      | -----      | -          |             |             |      |
| Felis_catus                 | -----      | -----       | -----      | -----      | -          |             |             |      |
| Ochotona_princeps           | -----      | -----       | -----      | -----      | -          |             |             |      |
| Cercopithecidae             | -----      | -----       | -----      | -----      | -          |             |             |      |
| Carnivora                   | -----      | -----       | -----      | -----      | -          |             |             |      |
| Mus                         | -----      | -----       | -----      | -----      | -          |             |             |      |
| Mus_musculus                | -----      | -----       | -----      | -----      | -          |             |             |      |
| Rattus_norvegicus           | -----      | -----       | -----      | -----      | -          |             |             |      |
| Tursiops_truncatus          | -----      | -----       | -----      | -----      | -          |             |             |      |
| Procapra_capensis           | -----      | -----       | -----      | -----      | -          |             |             |      |
| Primates                    | -----      | -----       | -----      | -----      | -          |             |             |      |
| Echinops_telfairi           | -----      | -----       | -----      | -----      | -          |             |             |      |
| Sorex_araneus               | -----      | -----       | -----      | -----      | -          |             |             |      |
| Canidae                     | -----      | -----       | -----      | -----      | -          |             |             |      |
| Otomur_garnettii            | -----      | -----       | -----      | -----      | -          |             |             |      |
| Gallus                      | -----      | -----       | -----      | -----      | -          |             |             |      |
| Callithrix_jacchus          | -----      | -----       | -----      | -----      | -          |             |             |      |
| Crocodylus_porosus          | -----      | -----       | -----      | -----      | -          |             |             |      |
| Erinaceus_europaeus         | -----      | -----       | -----      | -----      | -          |             |             |      |
| rnd-6_family-7426-LTR-ERV1  | -----      | -----       | -----      | -----      | -          |             |             |      |
| Esox_lucius                 | -----      | -----       | -----      | -----      | -          |             |             |      |
| Salmo_salar                 | -----      | -----       | -----      | -----      | -          |             |             |      |
| Didelphidae                 | -----      | -----       | -----      | -----      | -          |             |             |      |
| Latimeria_chalumnae         | -----      | -----       | -----      | -----      | -          |             |             |      |
| Monodelphis_domestica       | -----      | -----       | -----      | -----      | -          |             |             |      |
| Macropus_eugenii            | -----      | -----       | -----      | -----      | -          |             |             |      |
| Alligator_mississippiensis  | -----      | -----       | -----      | -----      | -          |             |             |      |
| Chrysemys_picta_bellii      | -----      | -----       | -----      | -----      | -          |             |             |      |
| Danio_rerio                 | -----      | -----       | -----      | -----      | -          |             |             |      |
| Taeniopygia                 | -----      | -----       | -----      | -----      | -          |             |             |      |
| Dasybus_novemcinctus        | -----      | -----       | -----      | -----      | -          |             |             |      |
| LTR_XT                      | -----      | -----       | -----      | -----      | -          |             |             |      |
| Haplorrhini                 | GATATGCTTT | TGCCACCTTG  | CATGCTCATG | GAGCCATTTA | CAAAGAAAAG | GGACTGTAA   | CTACTGAAGG  | 4855 |
| Catarrhini                  | GATACGCCTT | TCTAACCCCTC | CAAGTGCATG | GAGCATTATA | TAAGGAAAAG | GGCCTGTAA   | ACTCTGGGGG  | 4339 |
| Anolis_carolinensis         | AATATGCCTT | CANTACTCTN  | CACGCNCACG | GTGNNATTTA | GAAGGAAAAG | GGACTGTGTA  | CCTCTGCAGG  | 908  |
| Murine_leukemia_virus       | GCTATGCCTT | CGCCACGGCC  | CATGTCCATG | GGGAAATATA | TAGGAGGCGG | GGGTTGCTGA  | CCTCAGAAGG  | 4299 |
| Phascolarctos_cinereus      | GGTACGCCTT | TGCCACCGCT  | CATGTTACAG | GGGCTATATA | CAAACAAAAG | GGACTGCTCA  | CTTCGCTGG   | 4195 |
| Estrildidae                 | -----      | -----       | -----      | -----      | -          |             |             |      |
| Xenopus_Silurana_tropicalis | -----      | -----       | -----      | -----      | -          |             |             |      |
| L_XT                        | TATGTGTCT  | CCAGATGGGG  | TTTTCCACAA | ATTTTAGAGT | GGGACAGNGG | NACCTTATTT  | ACTTGTCCANG | 4378 |
| Takifugu_rubripes           | -----      | -----       | -----      | -----      | -          |             |             |      |
| Bos_taurus                  | -----      | -----       | -----      | -----      | -          |             |             |      |
| Homo_sapiens                | -----      | -----       | -----      | -----      | -          |             |             |      |
| Microcebus_murinus          | -----      | -----       | -----      | -----      | -          |             |             |      |
| Myotis_lucifugus            | -----      | -----       | -----      | -----      | -          |             |             |      |
| Equus_caballus              | -----      | -----       | -----      | -----      | -          |             |             |      |
| Tupaia_belangeri            | -----      | -----       | -----      | -----      | -          |             |             |      |
| Loxodonta_africana          | -----      | -----       | -----      | -----      | -          |             |             |      |
| Murinae                     | -----      | -----       | -----      | -----      | -          |             |             |      |
| Canis_lupus_familiaris      | -----      | -----       | -----      | -----      | -          |             |             |      |
| Sus_scrofa                  | -----      | -----       | -----      | -----      | -          |             |             |      |
| Choloepus_hoffmanni         | -----      | -----       | -----      | -----      | -          |             |             |      |
| Vicugna_pacos               | -----      | -----       | -----      | -----      | -          |             |             |      |
| Gavialis_gangeticus         | -----      | -----       | -----      | -----      | -          |             |             |      |
| Mammalia                    | -----      | -----       | -----      | -----      | -          |             |             |      |
| Passeroidea                 | -----      | -----       | -----      | -----      | -          |             |             |      |
| Takifugu                    | -----      | -----       | -----      | -----      | -          |             |             |      |
| Pteropus_vampyrus           | -----      | -----       | -----      | -----      | -          |             |             |      |
| Ornithorhynchus             | -----      | -----       | -----      | -----      | -          |             |             |      |
| Oryctolagus_cuniculus       | -----      | -----       | -----      | -----      | -          |             |             |      |
| Gallus_gallus               | -----      | -----       | -----      | -----      | -          |             |             |      |
| Hominidae                   | GGCGTGACCT | ACATATTATC  | CTAACATCCA | CTCTGTCCCC | AGAGGAGAGG | GAGCGAGTCC  | AGGCGGTGGC  | 1165 |
| Metatheria                  | -----      | -----       | -----      | -----      | -          |             |             |      |
| Rodentia                    | -----      | -----       | -----      | -----      | -          |             |             |      |
| Monodelphis                 | -----      | -----       | -----      | -----      | -          |             |             |      |
| Consensus                   | -----      | -----       | -----      | -----      | -          |             |             |      |
| Conservation                | 100%       | -----       | -----      | -----      | -----      | -----       | -----       | 0%   |

|                             | 4,920             | 4,940              | 4,960             |                   |                   |                   |                   |      |
|-----------------------------|-------------------|--------------------|-------------------|-------------------|-------------------|-------------------|-------------------|------|
| Dipodomys_ordii             | -----             | -----              | -----             | -                 |                   |                   |                   |      |
| Laurasiatheria              | -----             | -----              | -----             | -                 |                   |                   |                   |      |
| Eutheria                    | -----             | -----              | -----             | -                 |                   |                   |                   |      |
| Tarsius_syrichta            | -----             | -----              | -----             | -                 |                   |                   |                   |      |
| Muridae                     | -----             | -----              | -----             | -                 |                   |                   |                   |      |
| Gasterosteus_aculeatus      | -----             | -----              | -----             | -                 |                   |                   |                   |      |
| Felis_silvestris            | -----             | -----              | -----             | -                 |                   |                   |                   |      |
| Rattus                      | -----             | -----              | -----             | -                 |                   |                   |                   |      |
| Papio_hamadryas             | <b>GCACAAATGG</b> | <b>ACTAACCGCC</b>  | <b>GGACAGTTAA</b> | <b>CCTAGGGCAA</b> | <b>GGAATGGTGA</b> | <b>CACACTCCTT</b> | <b>CTTGGTGGTA</b> | 2283 |
| Pan_troglodytes             | <b>GAATGGCCGC</b> | <b>CTGTGTGGGT</b>  | <b>GGCCCGGGGA</b> | <b>CCTTCGACTG</b> | <b>CTCATCAGGG</b> | <b>TAAGCAAGTT</b> | <b>ACCGGGCCGG</b> | 358  |
| Ailuropoda_melanoleuca      | -----             | -----              | -----             | -----             | -----             | -----             | -----             | -    |
| Cavia_porcellus             | -----             | -----              | -----             | -----             | -----             | -----             | -----             | -    |
| Ictidomys_tridecemlineatus  | -----             | -----              | -----             | -----             | -----             | -----             | -----             | -    |
| Canis                       | -----             | -----              | -----             | -----             | -----             | -----             | -----             | -    |
| Felis_catus                 | -----             | -----              | -----             | -----             | -----             | -----             | -----             | -    |
| Ochotona_princeps           | -----             | -----              | -----             | -----             | -----             | -----             | -----             | -    |
| Cercopithecidae             | -----             | -----              | -----             | -----             | -----             | -----             | -----             | -    |
| Carnivora                   | -----             | -----              | -----             | -----             | -----             | -----             | -----             | -    |
| Mus                         | -----             | -----              | -----             | -----             | -----             | -----             | -----             | -    |
| Mus_musculus                | -----             | -----              | -----             | -----             | -----             | -----             | -----             | -    |
| Rattus_norvegicus           | -----             | -----              | -----             | -----             | -----             | -----             | -----             | -    |
| Tursiops_truncatus          | -----             | -----              | -----             | -----             | -----             | -----             | -----             | -    |
| Procapra_capensis           | -----             | -----              | -----             | -----             | -----             | -----             | -----             | -    |
| Primates                    | -----             | -----              | -----             | -----             | -----             | -----             | -----             | -    |
| Echinops_telfairi           | -----             | -----              | -----             | -----             | -----             | -----             | -----             | -    |
| Sorex_araneus               | -----             | -----              | -----             | -----             | -----             | -----             | -----             | -    |
| Canidae                     | -----             | -----              | -----             | -----             | -----             | -----             | -----             | -    |
| Otolemur_garnettii          | -----             | -----              | -----             | -----             | -----             | -----             | -----             | -    |
| Gallus                      | -----             | -----              | -----             | -----             | -----             | -----             | -----             | -    |
| Callithrix_jacchus          | -----             | -----              | -----             | -----             | -----             | -----             | -----             | -    |
| Crocodylus_porosus          | -----             | -----              | -----             | -----             | -----             | -----             | -----             | -    |
| Erinaceus_europaeus         | -----             | -----              | -----             | -----             | -----             | -----             | -----             | -    |
| rnd-6_family-7426-LTR-ERV1  | -----             | -----              | -----             | -----             | -----             | -----             | -----             | -    |
| Esox_lucius                 | -----             | -----              | -----             | -----             | -----             | -----             | -----             | -    |
| Salmo_salar                 | -----             | -----              | -----             | -----             | -----             | -----             | -----             | -    |
| Didelphidae                 | -----             | -----              | -----             | -----             | -----             | -----             | -----             | -    |
| Latimeria_chalumnae         | -----             | -----              | -----             | -----             | -----             | -----             | -----             | -    |
| Monodelphis_domestica       | -----             | -----              | -----             | -----             | -----             | -----             | -----             | -    |
| Macropus_eugenii            | -----             | -----              | -----             | -----             | -----             | -----             | -----             | -    |
| Alligator_mississippiensis  | -----             | -----              | -----             | -----             | -----             | -----             | -----             | -    |
| Chrysemys_picta_bellii      | -----             | -----              | -----             | -----             | -----             | -----             | -----             | -    |
| Danio_rerio                 | -----             | -----              | -----             | -----             | -----             | -----             | -----             | -    |
| Taeniopygia                 | -----             | -----              | -----             | -----             | -----             | -----             | -----             | -    |
| Dasybus_novemcinctus        | -----             | -----              | -----             | -----             | -----             | -----             | -----             | -    |
| LTR_XT                      | -----             | -----              | -----             | -----             | -----             | -----             | -----             | -    |
| Haplorrhini                 | <b>AAAAGAAATA</b> | <b>AAGAACAAAA</b>  | <b>AGGAAATAGA</b> | <b>GCAGCTCCTA</b> | <b>GAGGCTGTAT</b> | <b>GGGCTCCAAA</b> | <b>GGAAGTAGCA</b> | 4925 |
| Catarrhini                  | <b>AAAGGACATA</b> | <b>AAATATCAAC</b>  | <b>AAGAAATTCT</b> | <b>ACAATTATTA</b> | <b>GAGGCAGTGT</b> | <b>GGAAACCTCA</b> | <b>GAAGGCGGCA</b> | 4409 |
| Anolis_carolinensis         | <b>ACAGCAGATC</b> | <b>AAANACCCAA</b>  | <b>NANAAATTTT</b> | <b>GNANCTTTA</b>  | <b>GATGNTNTTT</b> | <b>GGATNCCNAA</b> | <b>TGAGGTAGCA</b> | 978  |
| Murine_leukemia_virus       | <b>CAAGGAAATC</b> | <b>AAAAACAAAA</b>  | <b>GCGAGATCCT</b> | <b>AGCCTTGCTG</b> | <b>AAAGCCCTCT</b> | <b>TTCTGCCNAA</b> | <b>GAGACTCAGT</b> | 4369 |
| Phascolarctos_cinereus      | <b>AAAAGACATC</b> | <b>AAGAACAAAAG</b> | <b>AGGAGATTTT</b> | <b>GGCCCTGCTA</b> | <b>GAGGCCATCC</b> | <b>ATCTCCCTAA</b> | <b>GCGAGTCGCT</b> | 4265 |
| Estrildidae                 | -----             | -----              | -----             | -----             | -----             | -----             | -----             | -    |
| Xenopus_Silurana_tropicalis | -----             | -----              | -----             | -----             | -----             | -----             | -----             | -    |
| L_XT                        | <b>NAANGCTAAA</b> | <b>GACATATGCN</b>  | <b>ATNTTGGNNA</b> | <b>TNACACTACG</b> | <b>TACACATNGT</b> | <b>GTNNCNTCCN</b> | <b>NAATCTTNGG</b> | 4448 |
| Takifugu_rubripes           | -----             | -----              | -----             | -----             | -----             | -----             | -----             | -    |
| Bos_taurus                  | -----             | -----              | -----             | -----             | -----             | -----             | -----             | -    |
| Homo_sapiens                | -----             | -----              | -----             | -----             | -----             | -----             | -----             | -    |
| Microcebus_murinus          | -----             | -----              | -----             | -----             | -----             | -----             | -----             | -    |
| Myotis_lucifugus            | -----             | -----              | -----             | -----             | -----             | -----             | -----             | -    |
| Equus_caballus              | -----             | -----              | -----             | -----             | -----             | -----             | -----             | -    |
| Tupaia_belangeri            | -----             | -----              | -----             | -----             | -----             | -----             | -----             | -    |
| Loxodonta_africana          | -----             | -----              | -----             | -----             | -----             | -----             | -----             | -    |
| Murinae                     | -----             | -----              | -----             | -----             | -----             | -----             | -----             | -    |
| Canis_lupus_familiaris      | -----             | -----              | -----             | -----             | -----             | -----             | -----             | -    |
| Sus_scrofa                  | -----             | -----              | -----             | -----             | -----             | -----             | -----             | -    |
| Choloepus_hoffmanni         | -----             | -----              | -----             | -----             | -----             | -----             | -----             | -    |
| Vicugna_pacos               | -----             | -----              | -----             | -----             | -----             | -----             | -----             | -    |
| Gavialis_gangeticus         | -----             | -----              | -----             | -----             | -----             | -----             | -----             | -    |
| Mammalia                    | -----             | -----              | -----             | -----             | -----             | -----             | -----             | -    |
| Passeroidea                 | -----             | -----              | -----             | -----             | -----             | -----             | -----             | -    |
| Takifugu                    | -----             | -----              | -----             | -----             | -----             | -----             | -----             | -    |
| Pteropus_vampyrus           | -----             | -----              | -----             | -----             | -----             | -----             | -----             | -    |
| Ornithorhynchus             | -----             | -----              | -----             | -----             | -----             | -----             | -----             | -    |
| Oryctolagus_cuniculus       | -----             | -----              | -----             | -----             | -----             | -----             | -----             | -    |
| Gallus_gallus               | -----             | -----              | -----             | -----             | -----             | -----             | -----             | -    |
| Hominidae                   | <b>TAGGCAACAT</b> | <b>GCGACAAAA</b>   | <b>TTCATTTAAC</b> | <b>TGACCCTGCC</b> | <b>ATGCCTGTCG</b> | <b>GAACCCTAGC</b> | <b>AGTACCGGCA</b> | 1235 |
| Metatheria                  | -----             | -----              | -----             | -----             | -----             | -----             | -----             | -    |
| Rodentia                    | -----             | -----              | -----             | -----             | -----             | -----             | -----             | -    |
| Monodelphis                 | -----             | -----              | -----             | -----             | -----             | -----             | -----             | -    |
| Consensus                   | -----             | -----              | -----             | -----             | -----             | -----             | -----             | -    |
| Conservation                | 100%              | -----              | -----             | -----             | -----             | -----             | -----             | 0%   |

|                             | 4,980             | 5,000              | 5,020             | 5,040             |                   |                    |                    |      |
|-----------------------------|-------------------|--------------------|-------------------|-------------------|-------------------|--------------------|--------------------|------|
| Dipodomys_ordii             | -----             | -----              | -----             | -----             | -                 |                    |                    |      |
| Laurasiatheria              | -----             | -----              | -----             | -----             | -                 |                    |                    |      |
| Eutheria                    | -----             | -----              | -----             | -----             | -                 |                    |                    |      |
| Tarsius_syrichta            | -----             | -----              | -----             | -----             | -                 |                    |                    |      |
| Muridae                     | -----             | -----              | -----             | -----             | -                 |                    |                    |      |
| Gasterosteus_aculeatus      | -----             | -----              | -----             | -----             | -                 |                    |                    |      |
| Felis_silvestris            | -----             | -----              | -----             | -----             | -                 |                    |                    |      |
| Rattus                      | -----             | -----              | -----             | -----             | -                 |                    |                    |      |
| Papio_hamadryas             | <b>CCTGAATGTC</b> | <b>CGTACCCCCT</b>  | <b>TCTGGGGCGA</b> | <b>GATCTCCTAA</b> | <b>CCAAACTCGG</b> | <b>AGCTCAGATC</b>  | <b>CACTTCTCCG</b>  | 2353 |
| Pan_troglodytes             | <b>CCAATGACAT</b> | <b>CCTATATCCT</b>  | <b>CATTGGAGGA</b> | <b>CCTGTTAGAC</b> | <b>CCCCCCTTGG</b> | <b>TGCCT---</b>    | <b>TC</b>          | 425  |
| Ailuropoda_melanoleuca      | -----             | -----              | -----             | -----             | -----             | -----              | -----              | -    |
| Cavia_porcellus             | -----             | -----              | -----             | -----             | -----             | -----              | -----              | -    |
| Ictidomys_tridecemlineatus  | -----             | -----              | -----             | -----             | -----             | -----              | -----              | -    |
| Canis                       | -----             | -----              | -----             | -----             | -----             | -----              | -----              | -    |
| Felis_catus                 | -----             | -----              | -----             | -----             | -----             | -----              | -----              | -    |
| Ochotona_princeps           | -----             | -----              | -----             | -----             | -----             | -----              | -----              | -    |
| Cercopithecidae             | -----             | -----              | -----             | -----             | -----             | -----              | -----              | -    |
| Carnivora                   | -----             | -----              | -----             | -----             | -----             | -----              | -----              | -    |
| Mus                         | -----             | -----              | -----             | -----             | -----             | -----              | -----              | -    |
| Mus_musculus                | -----             | -----              | -----             | -----             | -----             | -----              | -----              | -    |
| Rattus_norvegicus           | -----             | -----              | -----             | -----             | -----             | -----              | -----              | -    |
| Tursiops_truncatus          | -----             | -----              | -----             | -----             | -----             | -----              | -----              | -    |
| Procapra_capensis           | -----             | -----              | -----             | -----             | -----             | -----              | -----              | -    |
| Primates                    | -----             | -----              | -----             | -----             | -----             | -----              | -----              | -    |
| Echinops_telfairi           | -----             | -----              | -----             | -----             | -----             | -----              | -----              | -    |
| Sorex_araneus               | -----             | -----              | -----             | -----             | -----             | -----              | -----              | -    |
| Canidae                     | -----             | -----              | -----             | -----             | -----             | -----              | -----              | -    |
| Otomomys_garnettii          | -----             | -----              | -----             | -----             | -----             | -----              | -----              | -    |
| Gallus                      | -----             | -----              | -----             | -----             | -----             | -----              | -----              | -    |
| Callithrix_jacchus          | -----             | -----              | -----             | -----             | -----             | -----              | -----              | -    |
| Crocodylus_porosus          | -----             | -----              | -----             | -----             | -----             | -----              | -----              | -    |
| Erinaceus_europaeus         | -----             | -----              | -----             | -----             | -----             | -----              | -----              | -    |
| rnd-6_family-7426-LTR-ERV1  | -----             | -----              | -----             | -----             | -----             | -----              | -----              | -    |
| Esox_lucius                 | -----             | -----              | -----             | -----             | -----             | -----              | -----              | -    |
| Salmo_salar                 | -----             | -----              | -----             | -----             | -----             | -----              | -----              | -    |
| Didelphidae                 | -----             | -----              | -----             | -----             | -----             | -----              | -----              | -    |
| Latimeria_chalumnae         | -----             | -----              | -----             | -----             | -----             | -----              | -----              | -    |
| Monodelphis_domestica       | -----             | -----              | -----             | -----             | -----             | -----              | -----              | -    |
| Macropus_eugenii            | -----             | -----              | -----             | -----             | -----             | -----              | -----              | -    |
| Alligator_mississippiensis  | -----             | -----              | -----             | -----             | -----             | -----              | -----              | -    |
| Chrysemys_picta_bellii      | -----             | -----              | -----             | -----             | -----             | -----              | -----              | -    |
| Danio_rerio                 | -----             | -----              | -----             | -----             | -----             | -----              | -----              | -    |
| Taeniopygia                 | -----             | -----              | -----             | -----             | -----             | -----              | -----              | -    |
| Dasyus_novemcinctus         | -----             | -----              | -----             | -----             | -----             | -----              | -----              | -    |
| LTR_XT                      | -----             | -----              | -----             | -----             | -----             | -----              | -----              | -    |
| Haplorrhini                 | <b>GTCATCCACT</b> | <b>GTA AAGGACA</b> | <b>TCAAACAGGA</b> | <b>GGAAGTGATG</b> | <b>AGGCTACAGG</b> | <b>AAACAGAAAA</b>  | <b>GCAGACAAGG</b>  | 4995 |
| Catarrhini                  | <b>GTCATGCACT</b> | <b>GCAGGGGACA</b>  | <b>CCAGCGAGCC</b> | <b>TCCACCTCAG</b> | <b>TGGCCTTAGG</b> | <b>AAACTCTCGA</b>  | <b>GCTGATTCAG</b>  | 4479 |
| Anolis_carolinensis         | <b>GTCATGCATT</b> | <b>GCAAAGGACA</b>  | <b>GNAGTATGGA</b> | <b>GATGATCAGG</b> | <b>TAACCCACGG</b> | <b>AAATCGCCNN</b>  | <b>GCNGATC---</b>  | 1045 |
| Murine_leukemia_virus       | <b>ATAATCCATT</b> | <b>GCCCCGGGACA</b> | <b>TCAAAAAGGA</b> | <b>AACAGTGCCG</b> | <b>AAGCCAGGGG</b> | <b>CAACCGTATG</b>  | <b>GCGGACCAAG</b>  | 4439 |
| Phascolarctos_cinereus      | <b>ATCATCCATT</b> | <b>GCCCCGGCCA</b>  | <b>CCAAAGAGGG</b> | <b>ACTGACCCTG</b> | <b>TGGCTACCGG</b> | <b>AAACCGAAAAG</b> | <b>GCCGATGAGG</b>  | 4335 |
| Estrildidae                 | -----             | -----              | -----             | -----             | -----             | -----              | -----              | -    |
| Xenopus_Silurana_tropicalis | -----             | -----              | -----             | -----             | -----             | -----              | -----              | -    |
| LTR_XT                      | <b>CTATTGTCAA</b> | <b>AAGNNAANGC</b>  | <b>CATCATAAAN</b> | <b>TCCAAANTGA</b> | <b>CANAACGTGN</b> | <b>NGTAGNNAAA</b>  | <b>GGAAAAGACTT</b> | 4518 |
| Takifugu_rubripes           | -----             | -----              | -----             | -----             | -----             | -----              | -----              | -    |
| Bos_taurus                  | -----             | -----              | -----             | -----             | -----             | -----              | -----              | -    |
| Homo_sapiens                | -----             | -----              | -----             | -----             | -----             | -----              | -----              | -    |
| Microcebus_murinus          | -----             | -----              | -----             | -----             | -----             | -----              | -----              | -    |
| Myotis_lucifugus            | -----             | -----              | -----             | -----             | -----             | -----              | -----              | -    |
| Equus_caballus              | -----             | -----              | -----             | -----             | -----             | -----              | -----              | -    |
| Tupaia_belangeri            | -----             | -----              | -----             | -----             | -----             | -----              | -----              | -    |
| Loxodonta_africana          | -----             | -----              | -----             | -----             | -----             | -----              | -----              | -    |
| Murinae                     | -----             | -----              | -----             | -----             | -----             | -----              | -----              | -    |
| Canis_lupus_familiaris      | -----             | -----              | -----             | -----             | -----             | -----              | -----              | -    |
| Sus_scrofa                  | -----             | -----              | -----             | -----             | -----             | -----              | -----              | -    |
| Choloepus_hoffmanni         | -----             | -----              | -----             | -----             | -----             | -----              | -----              | -    |
| Vicugna_pacos               | -----             | -----              | -----             | -----             | -----             | -----              | -----              | -    |
| Gavialis_gangeticus         | -----             | -----              | -----             | -----             | -----             | -----              | -----              | -    |
| Mammalia                    | -----             | -----              | -----             | -----             | -----             | -----              | -----              | -    |
| Passeroidea                 | -----             | -----              | -----             | -----             | -----             | -----              | -----              | -    |
| Takifugu                    | -----             | -----              | -----             | -----             | -----             | -----              | -----              | -    |
| Pteropus_vampyrus           | -----             | -----              | -----             | -----             | -----             | -----              | -----              | -    |
| Ornithorhynchus             | -----             | -----              | -----             | -----             | -----             | -----              | -----              | -    |
| Oryctolagus_cuniculus       | -----             | -----              | -----             | -----             | -----             | -----              | -----              | -    |
| Gallus_gallus               | -----             | -----              | -----             | -----             | -----             | -----              | -----              | -    |
| Hominidae                   | <b>GCCGAGCCGG</b> | <b>ACTGGGATTA</b>  | <b>CAAAGCTGGT</b> | <b>CAGACTGGCC</b> | <b>GTCGACGCCG</b> | <b>TGACCAAATG</b>  | <b>GTTCAGTGCC</b>  | 1305 |
| Metatheria                  | -----             | -----              | -----             | -----             | -----             | -----              | -----              | -    |
| Rodentia                    | -----             | -----              | -----             | -----             | -----             | -----              | -----              | -    |
| Monodelphis                 | -----             | -----              | -----             | -----             | -----             | -----              | -----              | -    |
| Consensus                   | -----             | -----              | -----             | -----             | -----             | -----              | -----              | -    |
| Conservation                | 100%              | -----              | -----             | -----             | -----             | -----              | -----              | 0%   |

|                             | 5,060           |              | 5,080        |                | 5,100         |               |                |      |
|-----------------------------|-----------------|--------------|--------------|----------------|---------------|---------------|----------------|------|
| Dipodomys_ordii             |                 |              |              |                |               |               |                |      |
| Laurasiatheria              |                 |              |              |                |               |               |                |      |
| Eutheria                    |                 |              |              |                |               |               |                |      |
| Tarsius_syricha             |                 |              |              |                |               |               |                |      |
| Muridae                     |                 |              |              |                |               |               |                |      |
| Gasterosteus_aculeatus      |                 |              |              |                |               |               |                |      |
| Felis_silvestris            |                 |              |              |                |               |               |                |      |
| Rattus                      |                 |              |              |                |               |               |                |      |
| Papio_hamadryas             | AGGCAGGGGC      | CCAGGTGTTA   | GACCGAGATG   | GCCAACCCAT     | CCAAATTTTG    | ACTGTGTCTC    | TGCAAGATGA     | 2423 |
| Pan_troglodytes             | TAGCTCTCGC      | CTAAAC - CA  | AGCAACCAAC   | GCCCCCCAC      | CTGTTCTCCG    | AAGGGGACCC    | - -CTTCACAG    | 491  |
| Ailuropoda_melanoleuca      |                 |              |              |                |               |               |                |      |
| Cavia_porcellus             |                 |              |              |                |               |               |                |      |
| Ictidomys_tridecemlineatus  |                 |              |              |                |               |               |                |      |
| Canis                       |                 |              |              |                |               |               |                |      |
| Felis_catus                 |                 |              |              |                |               |               |                |      |
| Ochotona_princeps           |                 |              |              |                |               |               |                |      |
| Cercopithecidae             |                 |              |              |                |               |               |                |      |
| Carnivora                   |                 |              |              |                |               |               |                |      |
| Mus                         |                 |              |              |                |               |               |                |      |
| Mus_musculus                |                 |              |              |                |               |               |                |      |
| Rattus_norvegicus           |                 |              |              |                |               |               |                |      |
| Tursiops_truncatus          |                 |              |              |                |               |               |                |      |
| Procapra_capensis           |                 |              |              |                |               |               |                |      |
| Primates                    |                 |              |              |                |               |               |                |      |
| Echinops_telfairi           |                 |              |              |                |               |               |                |      |
| Sorex_araneus               |                 |              |              |                |               |               |                |      |
| Canidae                     |                 |              |              |                |               |               |                |      |
| Otolemur_garnettii          |                 |              |              |                |               |               |                |      |
| Gallus                      |                 |              |              |                |               |               |                |      |
| Callithrix_jacchus          |                 |              |              |                |               |               |                |      |
| Crocodylus_porosus          |                 |              |              |                |               |               |                |      |
| Erinaceus_europaeus         |                 |              |              |                |               |               |                |      |
| rnd-6_family-7426-LTR-ERV1  |                 |              |              |                |               |               |                |      |
| Esox_lucius                 |                 |              |              |                |               |               |                |      |
| Salmo_salar                 |                 |              |              |                |               |               |                |      |
| Didelphidae                 |                 |              |              |                |               |               |                |      |
| Latimeria_chalumnae         |                 |              |              |                |               |               |                |      |
| Monodelphis_domestica       |                 |              |              |                |               |               |                |      |
| Macropus_eugenii            |                 |              |              |                |               |               |                |      |
| Alligator_mississippiensis  |                 |              |              |                |               |               |                |      |
| Chrysemys_picta_bellii      |                 |              |              |                |               |               |                |      |
| Danio_rerio                 |                 |              |              |                |               |               |                |      |
| Taeniopygia                 |                 |              |              |                |               |               |                |      |
| Dasybus_novemcinctus        |                 |              |              |                |               |               |                |      |
| LTR_XT                      |                 |              |              |                |               |               |                |      |
| Haplorrhini                 | AAGCAAAAAG      | GGCTGCAATG   | ACAGAAAANA   | CAAAGAAAGA     | AGAGACTTAT    | GCCATGCCCT    | TATTAGAGCC     | 5065 |
| Catarrhini                  | AAGCTCGAAA      | AGCAGCATCT   | ACCCCT - TAC | CGGGCATCGG     | TAGCAGCACC    | CTTACTCCCT    | CA - - AACGCC  | 4546 |
| Anolis_carolinensis         | AAGCT - - - - A | GGCAGCAA - - | - - - - - AG | CGAACGTTCA     | TGAGACAAGC    | TCTA - - CCTG | CAAGAAGAGT     | 1099 |
| Murine_leukemia_virus       | CGGCCCGAGA      | GGCAGCCA - - | - - - - - CG | AGGACAGCTC     | CAGAAACCTC    | CACGCTCCTN    | ATAGAGGACT     | 4499 |
| Phascolarctos_cinereus      | CCGCGAAAACA     | AGCTGCCC - - | - - - - - AG | TCAA - - - - C | CAGAA - - - - | - - - - TACTG | ACGGAG - - - - | 4376 |
| Estrildidae                 |                 |              |              |                |               |               |                |      |
| Xenopus_Silurana_tropicalis |                 |              |              |                |               |               |                |      |
| L_XT                        | GGGCNGACAN      | ACNNNCTGON   | GTTCTNATNA   | CTANCAGNNA     | TACCACCTNA    | TCNNCTACCT    | ACATNAATNN     | 4588 |
| Takifugu_rubripes           |                 |              |              |                |               |               |                |      |
| Bos_taurus                  |                 |              |              |                |               |               |                |      |
| Homo_sapiens                |                 |              |              |                |               |               |                |      |
| Microcebus_murinus          |                 |              |              |                |               |               |                |      |
| Myotis_lucifugus            |                 |              |              |                |               |               |                |      |
| Equus_caballus              |                 |              |              |                |               |               |                |      |
| Tupaia_belangeri            |                 |              |              |                |               |               |                |      |
| Loxodonta_africana          |                 |              |              |                |               |               |                |      |
| Murinae                     |                 |              |              |                |               |               |                |      |
| Canis_lupus_familiaris      |                 |              |              |                |               |               |                |      |
| Sus_scrofa                  |                 |              |              |                |               |               |                |      |
| Choloepus_hoffmanni         |                 |              |              |                |               |               |                |      |
| Vicugna_pacos               |                 |              |              |                |               |               |                |      |
| Gavialis_gangeticus         |                 |              |              |                |               |               |                |      |
| Mammalia                    |                 |              |              |                |               |               |                |      |
| Passeroidea                 |                 |              |              |                |               |               |                |      |
| Takifugu                    |                 |              |              |                |               |               |                |      |
| Pteropus_vampyrus           |                 |              |              |                |               |               |                |      |
| Ornithorhynchus             |                 |              |              |                |               |               |                |      |
| Oryctolagus_cuniculus       |                 |              |              |                |               |               |                |      |
| Gallus_gallus               |                 |              |              |                |               |               |                |      |
| Hominidae                   | TTCTGGCAGG      | CATGCAGGCC   | GCTTCCAATA   | AGACGGTCAA     | CTTTGACAAA    | TTACGGGAGA    | TTATTCAAGG     | 1375 |
| Metatheria                  |                 |              |              |                |               |               |                |      |
| Rodentia                    |                 |              |              |                |               |               |                |      |
| Monodelphis                 |                 |              |              |                |               |               |                |      |
| Consensus                   |                 |              |              |                |               |               |                |      |
| Conservation                | 100%            |              |              |                |               |               |                | 0%   |

|                             | 5,120      | 5,140      | 5,160       | 5,180      |            |            |            |      |
|-----------------------------|------------|------------|-------------|------------|------------|------------|------------|------|
| Dipodomys_ordii             | -----      | -----      | -----       | -----      | -          |            |            |      |
| Laurasiatheria              | -----      | -----      | -----       | -----      | -          |            |            |      |
| Eutheria                    | -----      | -----      | -----       | -----      | -          |            |            |      |
| Tarsius_syricha             | -----      | -----      | -----       | -----      | -          |            |            |      |
| Muridae                     | -----      | -----      | -----       | -----      | -          |            |            |      |
| Gasterosteus_aculeatus      | -----      | -----      | -----       | -----      | -          |            |            |      |
| Felis_silvestris            | -----      | -----      | -----       | -----      | -          |            |            |      |
| Rattus                      | -----      | -----      | -----       | -----      | -          |            |            |      |
| Papio_hamadryas             | ACACCGGCTT | TTTGACATCC | CGGTCAACCAC | CAGCCTCCCT | GATGTCTGGT | TACAAGATTT | TCCCAAGCT  | 2493 |
| Pan_troglodytes             | ACCCCTCCT  | ACCCCGGCC  | CCCCACCCC   | CCTGCTGCCG | GAGGAGCAGC | GGGACGCGCC | CCGGCCCGCT | 561  |
| Ailuropoda_melanoleuca      | -----      | -----      | -----       | -----      | -          |            |            |      |
| Cavia_porcellus             | -----      | -----      | -----       | -----      | -          |            |            |      |
| Ictidomys_tridecemlineatus  | -----      | -----      | -----       | -----      | -          |            |            |      |
| Canis                       | -----      | -----      | -----       | -----      | -          |            |            |      |
| Felis_catus                 | -----      | -----      | -----       | -----      | -          |            |            |      |
| Ochotona_princeps           | -----      | -----      | -----       | -----      | -          |            |            |      |
| Cercopithecidae             | -----      | -----      | -----       | -----      | -          |            |            |      |
| Carnivora                   | -----      | -----      | -----       | -----      | -          |            |            |      |
| Mus                         | -----      | -----      | -----       | -----      | -          |            |            |      |
| Mus_musculus                | -----      | -----      | -----       | -----      | -          |            |            |      |
| Rattus_norvegicus           | -----      | -----      | -----       | -----      | -          |            |            |      |
| Tursiops_truncatus          | -----      | -----      | -----       | -----      | -          |            |            |      |
| Procapra_capensis           | -----      | -----      | -----       | -----      | -          |            |            |      |
| Primates                    | -----      | -----      | -----       | -----      | -          |            |            |      |
| Echinops_telfairi           | -----      | -----      | -----       | -----      | -          |            |            |      |
| Sorex_araneus               | -----      | -----      | -----       | -----      | -          |            |            |      |
| Canidae                     | -----      | -----      | -----       | -----      | -          |            |            |      |
| Otomur_garnettii            | -----      | -----      | -----       | -----      | -          |            |            |      |
| Gallus                      | -----      | -----      | -----       | -----      | -          |            |            |      |
| Callithrix_jacchus          | -----      | -----      | -----       | -----      | -          |            |            |      |
| Crocodylus_porosus          | -----      | -----      | -----       | -----      | -          |            |            |      |
| Erinaceus_europaeus         | -----      | -----      | -----       | -----      | -          |            |            |      |
| rnd-6_family-7426-LTR-ERV1  | -----      | -----      | -----       | -----      | -          |            |            |      |
| Esox_lucius                 | -----      | -----      | -----       | -----      | -          |            |            |      |
| Salmo_salar                 | -----      | -----      | -----       | -----      | -          |            |            |      |
| Didelphidae                 | -----      | -----      | -----       | -----      | -          |            |            |      |
| Latimeria_chalumnae         | -----      | -----      | -----       | -----      | -          |            |            |      |
| Monodelphis_domestica       | -----      | -----      | -----       | -----      | -          |            |            |      |
| Macropus_eugenii            | -----      | -----      | -----       | -----      | -          |            |            |      |
| Alligator_mississippiensis  | -----      | -----      | -----       | -----      | -          |            |            |      |
| Chrysemys_picta_bellii      | -----      | -----      | -----       | -----      | -          |            |            |      |
| Danio_rerio                 | -----      | -----      | -----       | -----      | -          |            |            |      |
| Taeniopygia                 | -----      | -----      | -----       | -----      | -          |            |            |      |
| Dasyus_novemcinctus         | -----      | -----      | -----       | -----      | -          |            |            |      |
| LTR_XT                      | -----      | -----      | -----       | -----      | -          |            |            |      |
| Haplorrhini                 | TCCCCTTGCA | GANACTCCTA | ACTACTC     | -GTCCAGTGA | GAAGGCGT   | -GGTTCGCG  | CAGGAAAACG | 5127 |
| Catarrhini                  | TGACCTGGTA | -----CCTA  | CCTATTCT    | -AAGGAAGAA | AAAGACTT   | -CTTCCAG   | CAGAAGGGGG | 4603 |
| Anolis_carolinensis         | GGCC       | -----      | -----       | -GAAGGT    | GGAGTTT    | -ATTCTGG   | ATTACCATG  | 1137 |
| Murine_leukemia_virus       | CGACCCCGTA | TACGCCCGCC | TATTTCCA    | CTACACCGAA | ACAGATCTAA | AAAGATTACG | AGAAGTGGGA | 4567 |
| Phascolarctos_cinereus      | -ACCACGAA  | AAATCAAGAA | CACCTTCGAGC | CTACACGGGG | GAAGATC    | -AAGCCGAG  | AGAGCT     | 4435 |
| Estrildidae                 | -----      | -----      | -----       | -----      | -          |            |            |      |
| Xenopus_Silurana_tropicalis | -----      | -----      | -----       | -----      | -          |            |            |      |
| L_XT                        | CTTTNGACTT | CATNAAAGGA | AGGCAAAAAGT | AAGGCTTCCA | CACAAAACCA | TATTAAGTGC | ACNACTGAAG | 4658 |
| Takifugu_rubripes           | -----      | -----      | -----       | -----      | -          |            |            |      |
| Bos_taurus                  | -----      | -----      | -----       | -----      | -          |            |            |      |
| Homo_sapiens                | -----      | -----      | -----       | -----      | -          |            |            |      |
| Microcebus_murinus          | -----      | -----      | -----       | -----      | -          |            |            |      |
| Myotis_lucifugus            | -----      | -----      | -----       | -----      | -          |            |            |      |
| Equus_caballus              | -----      | -----      | -----       | -----      | -          |            |            |      |
| Tupaia_belangeri            | -----      | -----      | -----       | -----      | -          |            |            |      |
| Loxodonta_africana          | -----      | -----      | -----       | -----      | -          |            |            |      |
| Murinae                     | -----      | -----      | -----       | -----      | -          |            |            |      |
| Canis_lupus_familiaris      | -----      | -----      | -----       | -----      | -          |            |            |      |
| Sus_scrofa                  | -----      | -----      | -----       | -----      | -          |            |            |      |
| Choloepus_hoffmanni         | -----      | -----      | -----       | -----      | -          |            |            |      |
| Vicugna_pacos               | -----      | -----      | -----       | -----      | -          |            |            |      |
| Gavialis_gangeticus         | -----      | -----      | -----       | -----      | -          |            |            |      |
| Mammalia                    | -----      | -----      | -----       | -----      | -          |            |            |      |
| Passeroidea                 | -----      | -----      | -----       | -----      | -          |            |            |      |
| Takifugu                    | -----      | -----      | -----       | -----      | -          |            |            |      |
| Pteropus_vampyrus           | -----      | -----      | -----       | -----      | -          |            |            |      |
| Ornithorhynchus             | -----      | -----      | -----       | -----      | -          |            |            |      |
| Oryctolagus_cuniculus       | -----      | -----      | -----       | -----      | -          |            |            |      |
| Gallus_gallus               | -----      | -----      | -----       | -----      | -          |            |            |      |
| Hominidae                   | GTCTGACGAG | AACCCAGCAG | TTTTCTTAA   | CCGCCTTACT | GAGGCCCTCA | TCCAGTATAC | CCGCCTTGAT | 1445 |
| Metatheria                  | -----      | -----      | -----       | -----      | -          |            |            |      |
| Rodentia                    | -----      | -----      | -----       | -----      | -          |            |            |      |
| Monodelphis                 | -----      | -----      | -----       | -----      | -          |            |            |      |
| Consensus                   | -----      | -----      | -----       | -----      | -          |            |            |      |
| Conservation                | 100%       | -----      | -----       | -----      | -----      | -----      | -----      | 0%   |

|                             | 5,200      |            | 5,220       |             | 5,240      |            |            |      |
|-----------------------------|------------|------------|-------------|-------------|------------|------------|------------|------|
| Dipodomys_ordii             |            |            |             |             |            |            |            |      |
| Laurasiatheria              |            |            |             |             |            |            |            |      |
| Eutheria                    |            |            |             |             |            |            |            |      |
| Tarsius_syrichtha           |            |            |             |             |            |            |            |      |
| Muridae                     |            |            |             |             |            |            |            |      |
| Gasterosteus_aculeatus      |            |            |             |             |            |            |            |      |
| Felis_silvestris            |            |            |             |             |            |            |            |      |
| Rattus                      |            |            |             |             |            |            |            |      |
| Papio_hamadryas             | TGGGCGGAAA | CGGGAGGACT | TGGGCGGGCC  | AAGTGTCAAG  | CCCCAATCAT | AATTGATCTA | AAGCCCACA  | 2562 |
| Pan_troglodytes             | AAACTTGAAC | CCGGGGGACC | --AGCCACTC  | CGACGCCCTC  | ACCGCCTCAC | GGGGTACGGA | ATGCCCCGC  | 629  |
| Ailuropoda_melanoleuca      |            |            |             |             |            |            |            |      |
| Cavia_porcellus             |            |            |             |             |            |            |            |      |
| Ictidomys_tridecemlineatus  |            |            |             |             |            |            |            |      |
| Canis                       |            |            |             |             |            |            |            |      |
| Felis_catus                 |            |            |             |             |            |            |            |      |
| Ochotona_princeps           |            |            |             |             |            |            |            |      |
| Cercopithecidae             |            |            |             |             |            |            |            |      |
| Carnivora                   |            |            |             |             |            |            |            |      |
| Mus                         |            |            |             |             |            |            |            |      |
| Mus_musculus                |            |            |             |             |            |            |            |      |
| Rattus_norvegicus           |            |            |             |             |            |            |            |      |
| Tursiops_truncatus          |            |            |             |             |            |            |            |      |
| Procapra_capensis           |            |            |             |             |            |            |            |      |
| Primates                    |            |            |             |             |            |            |            |      |
| Echinops_telfairi           |            |            |             |             |            |            |            |      |
| Sorex_araneus               |            |            |             |             |            |            |            |      |
| Canidae                     |            |            |             |             |            |            |            |      |
| Otomur_garnettii            |            |            |             |             |            |            |            |      |
| Gallus                      |            |            |             |             |            |            |            |      |
| Callithrix_jacchus          |            |            |             |             |            |            |            |      |
| Crocodylus_porosus          |            |            |             |             |            |            |            |      |
| Erinaceus_europaeus         |            |            |             |             |            |            |            |      |
| rnd-6_family-7426-LTR-ERV1  |            |            |             |             |            |            |            |      |
| Esox_lucius                 |            |            |             |             |            |            |            |      |
| Salmo_salar                 |            |            |             |             |            |            |            |      |
| Didelphidae                 |            |            |             |             |            |            |            |      |
| Latimeria_chalumnae         |            |            |             |             |            |            |            |      |
| Monodelphis_domestica       |            |            |             |             |            |            |            |      |
| Macropus_eugenii            |            |            |             |             |            |            |            |      |
| Alligator_mississippiensis  |            |            |             |             |            |            |            |      |
| Chrysemys_picta_bellii      |            |            |             | TTGCC       | GGAGGCGAAT | GCTGGAGGGA | GGAGGCCGCA | 36   |
| Danio_rerio                 |            |            |             |             |            |            |            |      |
| Taeniopygia                 |            |            |             |             |            |            |            |      |
| Dasyus_novemcinctus         |            |            |             |             |            |            |            |      |
| LTR_XT                      |            |            |             |             |            |            |            |      |
| Haplorrhini                 | GGAGTTATCA | GAAAGGAGGC | TGGTGA-AG   | TTTTTCAGATG | GGAGGCTTGC | CATTCCAGAA | GCCATTGCC  | 5196 |
| Catarrhini                  | GCAAGTAATA | -AAAGGAGGA | TGGATCA-GA  | CTGCCAGATG  | GGAGGGTAGC | TGTCCCGCAG | TTGCTGGGAG | 4671 |
| Anolis_carolinensis         | GGTGACTTTA | GCCGCGATGT | TGTA AAA-AC | CTAGTGGATT  | GCAATGCC-- |            |            | 1184 |
| Murine_leukemia_virus       | GCCGCCTATA | ATCAGATAAA | AGGATATTGG  | GTCCTACAAG  | GCAAGCCGGT | AATGCCCGAT | CAGTTCCGCT | 4637 |
| Phascolarctos_cinereus      | --CACCCCTG | ACCAGGGAAG | GGAAT----   | -TCATTCAAC  | G-----     | ---GCTGCAT | CAGCTCACGC | 4485 |
| Estrildidae                 |            |            |             |             |            |            |            |      |
| Xenopus_Silurana_tropicalis |            |            |             |             |            |            |            |      |
| IXT                         | GNTGCAATTG | CAAAATCATG | ATNTTTTGNA  | ATATNACAAN  | GAAAGTTTGT | ATGCACNNTN | CCATATNCTT | 4728 |
| Takifugu_rubripes           |            |            |             |             |            |            |            |      |
| Bos_taurus                  |            |            |             |             |            |            |            |      |
| Homo_sapiens                |            |            |             |             |            |            |            |      |
| Microcebus_murinus          |            |            |             |             |            |            |            |      |
| Myotis_lucifugus            |            |            |             |             |            |            |            |      |
| Equus_caballus              |            |            |             |             |            |            |            |      |
| Tupaia_belangeri            |            |            |             |             |            |            |            |      |
| Loxodonta_africana          |            |            |             |             |            |            |            |      |
| Murinae                     |            |            |             |             |            |            |            |      |
| Canis_lupus_familiaris      |            |            |             |             |            |            |            |      |
| Sus_scrofa                  |            |            |             |             |            |            |            |      |
| Choloepus_hoffmanni         |            |            |             |             |            |            |            |      |
| Vicugna_pacos               |            |            |             |             |            |            |            |      |
| Gavialis_gangeticus         |            |            |             |             |            |            |            |      |
| Mammalia                    |            |            |             |             |            |            |            |      |
| Passeroidea                 |            |            |             |             |            |            |            |      |
| Takifugu                    |            |            |             |             |            |            |            |      |
| Pteropus_vampyrus           |            |            |             |             |            |            |            |      |
| Ornithorhynchus             |            |            |             |             |            |            |            |      |
| Oryctolagus_cuniculus       |            |            |             |             |            |            |            |      |
| Gallus_gallus               |            |            |             |             |            |            |            |      |
| Hominidae                   | CCCACCTCCC | CGGCAGGGGC | CACGTCTTTG  | GCTACTCATT  | TCATTTCCCA | ATCAGCGGGA | GATATTCCGA | 1515 |
| Metatheria                  |            |            |             |             |            |            |            |      |
| Rodentia                    |            |            |             |             |            |            |            |      |
| Monodelphis                 |            |            |             |             |            |            |            |      |
| Consensus                   |            |            |             |             |            |            |            |      |
| Conservation                | 100%       |            |             |             |            |            |            | 0%   |

|                             | 5,260             | 5,280              | 5,300             | 5,320              |                   |                   |                   |      |
|-----------------------------|-------------------|--------------------|-------------------|--------------------|-------------------|-------------------|-------------------|------|
| Dipodomys_ordii             | -----             | -----              | -----             | -----              | -                 |                   |                   |      |
| Laurasiatheria              | -----             | -----              | -----             | -----              | -                 |                   |                   |      |
| Eutheria                    | -----             | -----              | -----             | -----              | -                 |                   |                   |      |
| Tarsius_syrichtha           | -----             | -----              | -----             | -----              | -                 |                   |                   |      |
| Muridae                     | -----             | -----              | -----             | -----              | -                 |                   |                   |      |
| Gasterosteus_aculeatus      | -----             | -----              | -----             | -----              | -                 |                   |                   |      |
| Felis_silvestris            | -----             | -----              | -----             | -----              | -                 |                   |                   |      |
| Rattus                      | -----             | -----              | -----             | -----              | -                 |                   |                   |      |
| Papio_hamadryas             | <b>GCGGTGCCTG</b> | <b>TATCTATCAA</b>  | <b>ACAATACCCC</b> | <b>ATGAGCCTAG</b>  | <b>AAGCTCATAT</b> | <b>GGGCATTCCG</b> | <b>CAACACATTA</b> | 2632 |
| Pan_troglodytes             | <b>ACAGGACCCA</b> | <b>GGTCCAGTAT</b>  | <b>GGCCTTCTCC</b> | <b>ACCGATCTTA</b>  | <b>AACTGGAAAC</b> | <b>CAGATCTCTT</b> | <b>TCAGACACCC</b> | 699  |
| Ailuropoda_melanoleuca      | -----             | -----              | -----             | -----              | -----             | -----             | -----             | -    |
| Cavia_porcellus             | -----             | -----              | -----             | -----              | -----             | -----             | -----             | -    |
| Ictidomys_tridecemlineatus  | -----             | -----              | -----             | -----              | -----             | -----             | -----             | -    |
| Canis                       | -----             | -----              | -----             | -----              | -----             | -----             | -----             | -    |
| Felis_catus                 | -----             | -----              | -----             | -----              | -----             | -----             | -----             | -    |
| Ochotona_princeps           | -----             | -----              | -----             | -----              | -----             | -----             | -----             | -    |
| Cercopithecidae             | -----             | -----              | -----             | -----              | -----             | -----             | -----             | -    |
| Carnivora                   | -----             | -----              | -----             | -----              | -----             | -----             | -----             | -    |
| Mus                         | -----             | -----              | -----             | -----              | -----             | -----             | -----             | -    |
| Mus_musculus                | -----             | -----              | -----             | -----              | -----             | -----             | -----             | -    |
| Rattus_norvegicus           | -----             | -----              | -----             | -----              | -----             | -----             | -----             | -    |
| Tursiops_truncatus          | -----             | -----              | -----             | -----              | -----             | -----             | -----             | -    |
| Procapra_capensis           | -----             | -----              | -----             | -----              | -----             | -----             | -----             | -    |
| Primates                    | -----             | -----              | -----             | -----              | -----             | -----             | -----             | -    |
| Echinops_telfairi           | -----             | -----              | -----             | -----              | -----             | -----             | -----             | -    |
| Sorex_araneus               | -----             | -----              | -----             | -----              | -----             | -----             | -----             | -    |
| Canidae                     | -----             | -----              | -----             | -----              | -----             | -----             | -----             | -    |
| Otomur_garnettii            | -----             | -----              | -----             | -----              | -----             | -----             | -----             | -    |
| Gallus                      | -----             | -----              | -----             | -----              | -----             | -----             | -----             | -    |
| Callithrix_jacchus          | -----             | -----              | -----             | -----              | -----             | -----             | -----             | -    |
| Crocodylus_porosus          | -----             | -----              | -----             | -----              | -----             | -----             | -----             | -    |
| Erinaceus_europaeus         | -----             | -----              | -----             | -----              | -----             | -----             | -----             | -    |
| rnd-6_family-7426-LTR-ERV1  | -----             | -----              | -----             | -----              | -----             | -----             | -----             | -    |
| Esox_lucius                 | -----             | -----              | -----             | -----              | -----             | -----             | -----             | -    |
| Salmo_salar                 | -----             | -----              | -----             | -----              | -----             | -----             | -----             | -    |
| Didelphidae                 | -----             | -----              | -----             | -----              | -----             | -----             | -----             | -    |
| Latimeria_chalumnae         | -----             | -----              | -----             | -----              | -----             | -----             | -----             | -    |
| Monodelphis_domestica       | -----             | -----              | -----             | -----              | -----             | -----             | -----             | -    |
| Macropus_eugenii            | -----             | -----              | -----             | -----              | -----             | -----             | -----             | -    |
| Alligator_mississippiensis  | -----             | -----              | -----             | -----              | -----             | -----             | -----             | -    |
| Chrysemys_picta_belli       | <b>CGCCGTCTTC</b> | <b>GCCGGACTGT</b>  | <b>TGCCGGACAA</b> | <b>GCCGGGATGA</b>  | <b>ACGTGGGGAG</b> | <b>CTTGTAGGTT</b> | <b>AACAGTGGAT</b> | 106  |
| Danio_rerio                 | -----             | -----              | -----             | -----              | -----             | -----             | -----             | -    |
| Taeniopygia                 | -----             | -----              | -----             | -----              | -----             | -----             | -----             | -    |
| Dasyus_novemcinctus         | -----             | -----              | -----             | -----              | -----             | -----             | -----             | -    |
| LTR_XT                      | -----             | -----              | -----             | -----              | -----             | -----             | -----             | -    |
| Haplorrhini                 | <b>CCCGATTAT</b>  | <b>AAAGCAGTTT</b>  | <b>CACCAAGGAA</b> | <b>CACACATGGG</b>  | <b>GAAGACAGCT</b> | <b>TTAGAGATTC</b> | <b>TCGT</b>       | 5260 |
| Catarrhini                  | <b>CCACAGTCGT</b> | <b>ATTGGCCATG</b>  | <b>CACGAAACCA</b> | <b>CTCATCTAGG</b>  | <b>NCAAGAGTCA</b> | <b>CTTGAAAAAT</b> | <b>TGTT</b>       | 4735 |
| Anolis_carolinensis         | -----             | -----              | -----             | -----              | -----             | -----             | -----             | 1184 |
| Murine_leukemia_virus       | <b>TTGAACTATT</b> | <b>AGACTCCCTA</b>  | <b>CACAGGCTCA</b> | <b>CCCACCTCAG</b>  | <b>CCCTCAAAG</b>  | <b>ATGAAGGCAC</b> | <b>TCCTTGACAG</b> | 4707 |
| Phascolarctos_cinereus      | <b>ACTTAGGGCC</b> | <b>AGACAAGCTT</b>  | <b>CTCCAGCTTG</b> | <b>TAGGTCGCAC</b>  | <b>CAGTTTTCAC</b> | <b>ATCCCGAATC</b> | <b>TCC</b>        | 4548 |
| Estrildidae                 | -----             | -----              | -----             | -----              | -----             | -----             | -----             | -    |
| Xenopus_Silurana_tropicalis | -----             | -----              | -----             | -----              | -----             | -----             | -----             | -    |
| L_XT                        | <b>CNCNTTGTNN</b> | <b>GCAAAAACATC</b> | <b>ACGCATCNCC</b> | <b>NATCTCANAT</b>  | <b>TTCNAAAAGG</b> | <b>GGGGGATGGT</b> | <b>CNTCATNGAA</b> | 4798 |
| Takifugu_rubripes           | -----             | -----              | -----             | -----              | -----             | -----             | -----             | -    |
| Bos_taurus                  | -----             | -----              | -----             | -----              | -----             | -----             | -----             | -    |
| Homo_sapiens                | -----             | -----              | -----             | -----              | -----             | -----             | -----             | -    |
| Microcebus_murinus          | -----             | -----              | -----             | -----              | -----             | -----             | -----             | -    |
| Myotis_lucifugus            | -----             | -----              | -----             | -----              | -----             | -----             | -----             | -    |
| Equus_caballus              | -----             | -----              | -----             | -----              | -----             | -----             | -----             | -    |
| Tupaia_belangeri            | -----             | -----              | -----             | -----              | -----             | -----             | -----             | -    |
| Loxodonta_africana          | -----             | -----              | -----             | -----              | -----             | -----             | -----             | -    |
| Murinae                     | -----             | -----              | -----             | -----              | -----             | -----             | -----             | -    |
| Canis_lupus_familiaris      | -----             | -----              | -----             | -----              | -----             | -----             | -----             | -    |
| Sus_scrofa                  | -----             | -----              | -----             | -----              | -----             | -----             | -----             | -    |
| Choloepus_hoffmanni         | -----             | -----              | -----             | -----              | -----             | -----             | -----             | -    |
| Vicugna_pacos               | -----             | -----              | -----             | -----              | -----             | -----             | -----             | -    |
| Gavialis_gangeticus         | -----             | -----              | -----             | -----              | -----             | -----             | -----             | -    |
| Mammalia                    | -----             | -----              | -----             | -----              | -----             | -----             | -----             | -    |
| Passeroidea                 | -----             | -----              | -----             | -----              | -----             | -----             | -----             | -    |
| Takifugu                    | -----             | -----              | -----             | -----              | -----             | -----             | -----             | -    |
| Pteropus_vampyrus           | -----             | -----              | -----             | -----              | -----             | -----             | -----             | -    |
| Ornithorhynchus             | -----             | -----              | -----             | -----              | -----             | -----             | -----             | -    |
| Oryctolagus_cuniculus       | -----             | -----              | -----             | -----              | -----             | -----             | -----             | -    |
| Gallus_gallus               | -----             | -----              | -----             | -----              | -----             | -----             | -----             | -    |
| Hominidae                   | <b>AAAAACTAAA</b> | <b>AAAGGCGGAG</b>  | <b>GAAGGCCCTC</b> | <b>AAACCCTCAAT</b> | <b>ACAGGACCTA</b> | <b>GTAAAAATGG</b> | <b>CCTTCAGGGT</b> | 1585 |
| Metatheria                  | -----             | -----              | -----             | -----              | -----             | -----             | -----             | -    |
| Rodentia                    | -----             | -----              | -----             | -----              | -----             | -----             | -----             | -    |
| Monodelphis                 | -----             | -----              | -----             | -----              | -----             | -----             | -----             | -    |
| Consensus                   | -----             | -----              | -----             | -----              | -----             | -----             | -----             | -    |
| Conservation                | 100%              | -----              | -----             | -----              | -----             | -----             | -----             | 0%   |



|                             | 5,340             | 5,360             | 5,380             |                   |                   |                   |                   |      |
|-----------------------------|-------------------|-------------------|-------------------|-------------------|-------------------|-------------------|-------------------|------|
| Dipodomys_ordii             | -----             | -----             | -----             | -                 |                   |                   |                   |      |
| Laurasiatheria              | -----             | -----             | -----             | -                 |                   |                   |                   |      |
| Eutheria                    | -----             | -----             | -----             | -                 |                   |                   |                   |      |
| Tarsius_syricha             | -----             | -----             | -----             | -                 |                   |                   |                   |      |
| Muridae                     | -----             | -----             | -----             | -                 |                   |                   |                   |      |
| Gasterosteus_aculeatus      | -----             | -----             | -----             | -                 |                   |                   |                   |      |
| Felis_silvestris            | -----             | -----             | -----             | -                 |                   |                   |                   |      |
| Rattus                      | -----             | -----             | -----             | -                 |                   |                   |                   |      |
| Papio_hamadryas             | <b>TCAAATTTCT</b> | <b>AGAACTTGA</b>  | <b>GTTTTGCGAC</b> | <b>CTTGTGCTC</b>  | <b>ACCCTGGAAT</b> | <b>ACTCCTCTTC</b> | <b>TGCCAGTAAA</b> | 2702 |
| Pan_troglodytes             | <b>AGTAGCTTAT</b> | <b>AGATTCTGTC</b> | <b>ACCAACCACC</b> | <b>ACTTGGGATG</b> | <b>ATGTCACAGC</b> | <b>TCTCCTTTTT</b> | <b>TACCAC--GA</b> | 767  |
| Ailuropoda_melanoleuca      | -----             | -----             | -----             | -----             | -----             | -----             | -----             | -    |
| Cavia_porcellus             | -----             | -----             | -----             | -----             | -----             | -----             | -----             | -    |
| Ictidomys_tridecemlineatus  | -----             | -----             | -----             | -----             | -----             | -----             | -----             | -    |
| Canis                       | -----             | -----             | -----             | -----             | -----             | -----             | -----             | -    |
| Felis_catus                 | -----             | -----             | -----             | -----             | -----             | -----             | -----             | -    |
| Ochotona_princeps           | -----             | -----             | -----             | -----             | -----             | -----             | -----             | -    |
| Cercopithecidae             | -----             | -----             | -----             | -----             | -----             | -----             | -----             | -    |
| Carnivora                   | -----             | -----             | -----             | -----             | -----             | -----             | -----             | -    |
| Mus                         | -----             | -----             | -----             | -----             | -----             | -----             | -----             | -    |
| Mus_musculus                | -----             | -----             | -----             | -----             | -----             | -----             | -----             | -    |
| Rattus_norvegicus           | -----             | -----             | -----             | -----             | -----             | -----             | -----             | -    |
| Tursiops_truncatus          | -----             | -----             | -----             | -----             | -----             | -----             | -----             | -    |
| Procapra_capensis           | -----             | -----             | -----             | -----             | -----             | -----             | -----             | -    |
| Primates                    | -----             | -----             | -----             | -----             | -----             | -----             | -----             | -    |
| Echinops_telfairi           | -----             | -----             | -----             | -----             | -----             | -----             | -----             | -    |
| Sorex_araneus               | -----             | -----             | -----             | -----             | -----             | -----             | -----             | -    |
| Canidae                     | -----             | -----             | -----             | -----             | -----             | -----             | -----             | -    |
| Otomur_garnettii            | -----             | -----             | -----             | -----             | -----             | -----             | -----             | -    |
| Gallus                      | -----             | -----             | -----             | -----             | -----             | -----             | -----             | -    |
| Callithrix_jacchus          | -----             | -----             | -----             | -----             | -----             | -----             | -----             | -    |
| Crocodylus_porosus          | -----             | -----             | -----             | -----             | -----             | -----             | -----             | -    |
| Erinaceus_europaeus         | -----             | -----             | -----             | -----             | -----             | -----             | -----             | -    |
| rnd-6_family-7426-LTR-ERV1  | -----             | -----             | -----             | -----             | -----             | -----             | -----             | -    |
| Esox_lucius                 | -----             | -----             | -----             | -----             | -----             | -----             | -----             | -    |
| Salmo_salar                 | -----             | -----             | -----             | -----             | -----             | -----             | -----             | -    |
| Didelphidae                 | -----             | -----             | -----             | -----             | -----             | -----             | -----             | -    |
| Latimeria_chalumnae         | -----             | -----             | -----             | -----             | -----             | -----             | -----             | -    |
| Monodelphis_domestica       | -----             | -----             | -----             | -----             | -----             | -----             | -----             | -    |
| Macropus_eugenii            | -----             | -----             | -----             | -----             | -----             | -----             | -----             | -    |
| Alligator_mississippiensis  | -----             | -----             | -----             | -----             | -----             | -----             | -----             | -    |
| Chrysemys_picta_bellii      | <b>TCTTTTTACG</b> | <b>GGGACCAGTG</b> | <b>CCAGATGGAG</b> | <b>ACAGAGTACC</b> | <b>AGGAATCCAA</b> | <b>ACTCTGGACG</b> | <b>GAAGTGTGTG</b> | 176  |
| Danio_rerio                 | -----             | -----             | -----             | -----             | -----             | -----             | -----             | -    |
| Taeniopygia                 | -----             | -----             | -----             | -----             | -----             | -----             | -----             | -    |
| Dasybus_novemcinctus        | -----             | -----             | -----             | -----             | -----             | -----             | -----             | -    |
| LTR_XT                      | -----             | -----             | -----             | -----             | -----             | -----             | -----             | -    |
| Haplorrhini                 | ---AGGGCGG        | TATTTCTNTG        | TGCCACGCCT        | AACTGCCATC        | ACTCGAGCCA        | TCTGCGAGCA        | GTGTGTTACT        | 5327 |
| Catarrhini                  | ---AGGCCGG        | TACTTCTAGC        | TCTCACACTT        | GCCAGGCCTT        | GCCAAAGCAG        | TAGCACAACG        | GTGGTTACT         | 4802 |
| Anolis_carolinensis         | -----             | -----             | -----             | -----             | -----             | -----             | -----             | 1184 |
| Murine_leukemia_virus       | <b>AGAAGAAAGC</b> | <b>CCCTACTACA</b> | <b>TGTTAAACCG</b> | <b>GGACAGAACT</b> | <b>CTCCAGTACG</b> | <b>TGGCGGAATC</b> | <b>CTGCACAGCT</b> | 4777 |
| Phascolarctos_cinereus      | -----AGT          | CTGTAGTGCG        | TG-----           | -----AAAT         | CACCAGCAAG        | TGTCAG-----       | -----GTT          | 4586 |
| Estrildidae                 | -----             | -----             | -----             | -----             | -----             | -----             | -----             | -    |
| Xenopus_Silurana_tropicalis | -----             | -----             | -----             | -----             | -----             | -----             | -----             | -    |
| L_XT                        | <b>ACACTAANTA</b> | <b>TGGTTTGCTC</b> | <b>CTGGTATTNG</b> | <b>CGCTNGGANC</b> | <b>NANAGATNNC</b> | <b>TATANTAAN</b>  | <b>NNATNANGTN</b> | 4868 |
| Takifugu_rubripes           | -----             | -----             | -----             | -----             | -----             | -----             | -----             | -    |
| Bos_taurus                  | -----             | -----             | -----             | -----             | -----             | -----             | -----             | -    |
| Homo_sapiens                | -----             | -----             | -----             | -----             | -----             | -----             | -----             | -    |
| Microcebus_murinus          | -----             | -----             | -----             | -----             | -----             | -----             | -----             | -    |
| Myotis_lucifugus            | -----             | -----             | -----             | -----             | -----             | -----             | -----             | -    |
| Equus_caballus              | -----             | -----             | -----             | -----             | -----             | -----             | -----             | -    |
| Tupaia_belangeri            | -----             | -----             | -----             | -----             | -----             | -----             | -----             | -    |
| Loxodonta_africana          | -----             | -----             | -----             | -----             | -----             | -----             | -----             | -    |
| Murinae                     | -----             | -----             | -----             | -----             | -----             | -----             | -----             | -    |
| Canis_lupus_familiaris      | -----             | -----             | -----             | -----             | -----             | -----             | -----             | -    |
| Sus_scrofa                  | -----             | -----             | -----             | -----             | -----             | -----             | -----             | -    |
| Choloepus_hoffmanni         | -----             | -----             | -----             | -----             | -----             | -----             | -----             | -    |
| Vicugna_pacos               | -----             | -----             | -----             | -----             | -----             | -----             | -----             | -    |
| Gavialis_gangeticus         | -----             | -----             | -----             | -----             | -----             | -----             | -----             | -    |
| Mammalia                    | -----             | -----             | -----             | -----             | -----             | -----             | -----             | -    |
| Passeroidea                 | -----             | -----             | -----             | -----             | -----             | -----             | -----             | -    |
| Takifugu                    | -----             | -----             | -----             | -----             | -----             | -----             | -----             | -    |
| Pteropus_vampyrus           | -----             | -----             | -----             | -----             | -----             | -----             | -----             | -    |
| Ornithorhynchus             | -----             | -----             | -----             | -----             | -----             | -----             | -----             | -    |
| Oryctolagus_cuniculus       | -----             | -----             | -----             | -----             | -----             | -----             | -----             | -    |
| Gallus_gallus               | -----             | -----             | -----             | -----             | -----             | -----             | -----             | -    |
| Hominidae                   | <b>CTATAATTCC</b> | <b>AGGGAGGAGA</b> | <b>CGGCTGAGGC</b> | <b>CCAAAGACAG</b> | <b>GCAAGGCTAA</b> | <b>AGCAGAAGGT</b> | <b>ACAGCTCCAG</b> | 1655 |
| Metatheria                  | -----             | -----             | -----             | -----             | -----             | -----             | -----             | -    |
| Rodentia                    | -----             | -----             | -----             | -----             | -----             | -----             | -----             | -    |
| Monodelphis                 | -----             | -----             | -----             | -----             | -----             | -----             | -----             | -    |
| Consensus                   | -----             | -----             | -----             | -----             | -----             | -----             | -----             | -    |
| Conservation                | 100%              | -----             | -----             | -----             | -----             | -----             | -----             | 0%   |

|                             | 5,400       | 5,420      | 5,440         | 5,460      |            |             |            |      |
|-----------------------------|-------------|------------|---------------|------------|------------|-------------|------------|------|
| Dipodomys_ordii             | -----       | -----      | -----         | -----      | -          |             |            |      |
| Laurasiatheria              | -----       | -----      | -----         | -----      | -          |             |            |      |
| Eutheria                    | -----       | -----      | -----         | -----      | -          |             |            |      |
| Tarsius_syrichtha           | -----       | -----      | -----         | -----      | -          |             |            |      |
| Muridae                     | -----       | -----      | -----         | -----      | -          |             |            |      |
| Gasterosteus_aculeatus      | -----       | -----      | -----         | -----      | -          |             |            |      |
| Felis_silvestris            | -----       | -----      | -----         | -----      | -          |             |            |      |
| Rattus                      | -----       | -----      | -----         | -----      | -          |             |            |      |
| Papio_hamadryas             | AAAGCCTGGT  | ACCCAGGATT | ACAGGCCCGT    | CCAAGATTTG | AGAGAAATTA | ATAAAAGAAC  | TGTGGATATC | 2772 |
| Pan_troglodytes             | AGAGGAAGGA  | ATCTGAAGCT | GAAGTGTCCC    | GGGGGGACGG | CCCGACCCCC | ACCATAAGAA  | TTTCCTCTAC | 837  |
| Ailuropoda_melanoleuca      | -----       | -----      | -----         | -----      | -          |             |            |      |
| Cavia_porcellus             | -----       | -----      | -----         | -----      | -          |             |            |      |
| Ictidomys_tridecemlineatus  | -----       | -----      | -----         | -----      | -          |             |            |      |
| Canis                       | -----       | -----      | -----         | -----      | -          |             |            |      |
| Felis_catus                 | -----       | -----      | -----         | -----      | -          |             |            |      |
| Ochotona_princeps           | -----       | -----      | -----         | -----      | -          |             |            |      |
| Cercopithecidae             | -----       | -----      | -----         | -----      | -          |             |            |      |
| Carnivora                   | -----       | -----      | -----         | -----      | -          |             |            |      |
| Mus                         | -----       | -----      | -----         | -----      | -          |             |            |      |
| Mus_musculus                | -----       | -----      | -----         | -----      | -          |             |            |      |
| Rattus_norvegicus           | -----       | -----      | -----         | -----      | -          |             |            |      |
| Tursiops_truncatus          | -----       | -----      | -----         | -----      | -          |             |            |      |
| Procapra_capensis           | -----       | -----      | -----         | -----      | -          |             |            |      |
| Primates                    | -----       | -----      | -----         | -----      | -          |             |            |      |
| Echinops_telfairi           | -----       | -----      | -----         | -----      | -          |             |            |      |
| Sorex_araneus               | -----       | -----      | -----         | -----      | -          |             |            |      |
| Canidae                     | -----       | -----      | -----         | -----      | -          |             |            |      |
| Otomur_garnettii            | -----       | -----      | -----         | -----      | -          |             |            |      |
| Gallus                      | -----       | -----      | -----         | -----      | -          |             |            |      |
| Callithrix_jacchus          | -----       | -----      | -----         | -----      | -          |             |            |      |
| Crocodylus_porosus          | -----       | -----      | -----         | -----      | -          |             |            |      |
| Erinaceus_europaeus         | -----       | -----      | -----         | -----      | -          |             |            |      |
| rnd-6_family-7426-LTR-ERV1  | -----       | -----      | -----         | -----      | -          |             |            |      |
| Esox_lucius                 | -----       | -----      | -----         | -----      | -          |             |            |      |
| Salmo_salar                 | -----       | -----      | -----         | -----      | -          |             |            |      |
| Didelphidae                 | -----       | -----      | -----         | -----      | -          |             |            |      |
| Latimeria_chalumnae         | -----       | -----      | -----         | -----      | -          |             |            |      |
| Monodelphis_domestica       | -----       | -----      | -----         | -----      | -          |             |            |      |
| Macropus_eugenii            | -----       | -----      | -----         | -----      | -          |             |            |      |
| Alligator_mississippiensis  | -----       | -----      | -----         | -----      | -          |             |            |      |
| Chrysemys_picta_bellii      | CTGAAAGAAA  | AACGAGGCAC | TGAGAGCCAG    | AGGATCTATT | AAACACCTCT | TTGTTTAGCA  | AACCTTATCA | 246  |
| Danio_rerio                 | -----       | -----      | -----         | -----      | -          |             |            |      |
| Taeniopygia                 | -----       | -----      | -----         | -----      | -          |             |            |      |
| Dasybus_novemcinctus        | -----       | -----      | -----         | -----      | -          |             |            |      |
| LTR_XT                      | -----       | -----      | -----         | -----      | -          |             |            |      |
| Haplorrhini                 | TGTGCCCAGA  | ATAACCCAAG | GCAAGGGCCT    | ACTCGGCCCC | CAGGAATTCA | GGAACACAGGA | GCAGTGCCAT | 5397 |
| Catarrhini                  | TGCCGACAGC  | ACAATGCGAG | GCAAGGCCCC    | ACTGTTCCGC | CGGCATACA  | AGCTTATGGA  | GCGGCTCCTT | 4872 |
| Anolis_carolinensis         | -----       | -----      | -----         | -----      | -          |             |            |      |
| Murine_leukemia_virus       | TGTGCTCAAG  | TGAATGCTAG | TAAAG- - - CC | AAAATCGGGG | CAGGGGTACG | AGTACGCGGA  | CATCGACCAG | 4844 |
| Phascolarctos_cinereus      | TGTGCTGTAA  | CTAACGCAGT | CACCA- - - CC | TACCGAGAGC | CTGGAAGGAG | GCAAAGGGGA  | GATCGACCCG | 4653 |
| Estrildidae                 | -----       | -----      | -----         | -----      | -          |             |            |      |
| Xenopus_Silurana_tropicalis | -----       | -----      | -----         | -----      | -          |             |            |      |
| LTR_XT                      | CNGTAAACAAC | ACANNTNCTA | ANNCNNACAA    | AGCCAATTTA | NAACANACCT | AGTCAAAAACN | TTTTATNGNT | 4938 |
| Takifugu_rubripes           | -----       | -----      | -----         | -----      | -          |             |            |      |
| Bos_taurus                  | -----       | -----      | -----         | -----      | -          |             |            |      |
| Homo_sapiens                | -----       | -----      | -----         | -----      | -          |             |            |      |
| Microcebus_murinus          | -----       | -----      | -----         | -----      | -          |             |            |      |
| Myotis_lucifugus            | -----       | -----      | -----         | -----      | -          |             |            |      |
| Equus_caballus              | -----       | -----      | -----         | -----      | -          |             |            |      |
| Tupaia_belangeri            | -----       | -----      | -----         | -----      | -          |             |            |      |
| Loxodonta_africana          | -----       | -----      | -----         | -----      | -          |             |            |      |
| Murinae                     | -----       | -----      | -----         | -----      | -          |             |            |      |
| Canis_lupus_familiaris      | -----       | -----      | -----         | -----      | -          |             |            |      |
| Sus_scrofa                  | -----       | -----      | -----         | -----      | -          |             |            |      |
| Choloepus_hoffmanni         | -----       | -----      | -----         | -----      | -          |             |            |      |
| Vicugna_pacos               | -----       | -----      | -----         | -----      | -          |             |            |      |
| Gavialis_gangeticus         | -----       | -----      | -----         | -----      | -          |             |            |      |
| Mammalia                    | -----       | -----      | -----         | -----      | -          |             |            |      |
| Passeroidea                 | -----       | -----      | -----         | -----      | -          |             |            |      |
| Takifugu                    | -----       | -----      | -----         | -----      | -          |             |            |      |
| Pteropus_vampyrus           | -----       | -----      | -----         | -----      | -          |             |            |      |
| Ornithorhynchus             | -----       | -----      | -----         | -----      | -          |             |            |      |
| Oryctolagus_cuniculus       | -----       | -----      | -----         | -----      | -          |             |            |      |
| Gallus_gallus               | -----       | -----      | -----         | -----      | -          |             |            |      |
| Hominidae                   | ACCCAGGCCT  | TGGTAGCTGC | CCCCGGGCTG    | GCCGGCTCCG | GGAGCCAACC | GAAAGGGGGT  | TCCGGCCACC | 1725 |
| Metatheria                  | -----       | -----      | -----         | -----      | -          |             |            |      |
| Rodentia                    | -----       | -----      | -----         | -----      | -          |             |            |      |
| Monodelphis                 | -----       | -----      | -----         | -----      | -          |             |            |      |
| Consensus                   | -----       | -----      | -----         | -----      | -          |             |            |      |
| Conservation                | 100%        | -----      | -----         | -----      | -----      | -----       | -----      | 0%   |

|                             | 5,480      |            |            | 5,500      |            |            | 5,520      |   |      |   |
|-----------------------------|------------|------------|------------|------------|------------|------------|------------|---|------|---|
| Dipodomys_ordii             | -          | -          | -          | -          | -          | -          | -          | - | -    | - |
| Laurasiatheria              | -          | -          | -          | -          | -          | -          | -          | - | -    | - |
| Eutheria                    | -          | -          | -          | -          | -          | -          | -          | - | -    | - |
| Tarsius_syricha             | -          | -          | -          | -          | -          | -          | -          | - | -    | - |
| Muridae                     | -          | -          | -          | -          | -          | -          | -          | - | -    | - |
| Gasterosteus_aculeatus      | -          | -          | -          | -          | -          | -          | -          | - | -    | - |
| Felis_silvestris            | -          | -          | -          | -          | -          | -          | -          | - | -    | - |
| Rattus                      | -          | -          | -          | -          | -          | -          | -          | - | -    | - |
| Papio_hamadryas             | CACCCTACGG | TCCCAATCC  | TTA---CAAC | TTGCTCAGTA | CCTTAAAACC | AGACTACAGC | T-----GGTA |   | 2834 |   |
| Pan_troglodytes             | CGCCGGGTGG | GACTAAACAC | GCAAGGTAGG | GAGCTCATT  | TCGCCAGCTC | TAATGGCAGG | TCTCGAGCGC |   | 907  |   |
| Ailuropoda_melanoleuca      | -          | -          | -          | -          | -          | -          | -          | - | -    | - |
| Cavia_porcellus             | -          | -          | -          | -          | -          | -          | -          | - | -    | - |
| Ictidomys_tridecemlineatus  | -          | -          | -          | -          | -          | -          | -          | - | -    | - |
| Canis                       | -          | -          | -          | -          | -          | -          | -          | - | -    | - |
| Felis_catus                 | -          | -          | -          | -          | -          | -          | -          | - | -    | - |
| Ochotona_princeps           | -          | -          | -          | -          | -          | -          | -          | - | -    | - |
| Cercopithecidae             | -          | -          | -          | -          | -          | -          | -          | - | -    | - |
| Carnivora                   | -          | -          | -          | -          | -          | -          | -          | - | -    | - |
| Mus                         | -          | -          | -          | -          | -          | -          | -          | - | -    | - |
| Mus_musculus                | -          | -          | -          | -          | -          | -          | -          | - | -    | - |
| Rattus_norvegicus           | -          | -          | -          | -          | -          | -          | -          | - | -    | - |
| Tursiops_truncatus          | -          | -          | -          | -          | -          | -          | -          | - | -    | - |
| Procapra_capensis           | -          | -          | -          | -          | -          | -          | -          | - | -    | - |
| Primates                    | -          | -          | -          | -          | -          | -          | -          | - | -    | - |
| Echinops_telfairi           | -          | -          | -          | -          | -          | -          | -          | - | -    | - |
| Sorex_araneus               | -          | -          | -          | -          | -          | -          | -          | - | -    | - |
| Canidae                     | -          | -          | -          | -          | -          | -          | -          | - | -    | - |
| Otomur_garnettii            | -          | -          | -          | -          | -          | -          | -          | - | -    | - |
| Gallus                      | -          | -          | -          | -          | -          | -          | -          | - | -    | - |
| Callithrix_jacchus          | -          | -          | -          | -          | -          | -          | -          | - | -    | - |
| Crocodylus_porosus          | -          | -          | -          | -          | -          | -          | -          | - | -    | - |
| Erinaceus_europaeus         | -          | -          | -          | -          | -          | -          | -          | - | -    | - |
| rnd-6_family-7426-LTR-ERV1  | -          | -          | -          | -          | -          | -          | -          | - | -    | - |
| Esox_lucius                 | -          | -          | -          | -          | -          | -          | -          | - | -    | - |
| Salmo_salar                 | -          | -          | -          | -          | -          | -          | -          | - | -    | - |
| Didelphidae                 | -          | -          | -          | -          | -          | -          | -          | - | -    | - |
| Latimeria_chalumnae         | -          | -          | -          | -          | -          | -          | -          | - | -    | - |
| Monodelphis_domestica       | -          | -          | -          | -          | -          | -          | -          | - | -    | - |
| Macropus_eugenii            | -          | -          | -          | -          | -          | -          | -          | - | -    | - |
| Alligator_mississippiensis  | -          | -          | -          | -          | -          | -          | -          | - | -    | - |
| Chrysemys_picta_bellii      | TTATGAAAGA | TTTGATGATT | CTCGTCGGAC | GTCCCGCCCC | CCGTGTTGGG | TCCCGGCCCC | CACCCACAGG |   | 316  |   |
| Danio_rerio                 | -          | -          | -          | -          | -          | -          | -          | - | -    | - |
| Taeniopygia                 | -          | -          | -          | -          | -          | -          | -          | - | -    | - |
| Dasybus_novemcinctus        | -          | -          | -          | -          | -          | -          | -          | - | -    | - |
| LTR_XT                      | -          | -          | -          | -          | -          | -          | -          | - | -    | - |
| Haplorrhini                 | GTGAAAACCT | GCTTGTAGAC | TTTACCGAAC | T--GCCTCA  | GGCTGGAGGC | TATCGGTACA | TGTTAGTGTT |   | 5464 |   |
| Catarrhini                  | TTGAGGATCT | TCAGGTGGAT | TTCACAGAAA | T--GCCGAA  | ATGTGGAGGT | AACAAGTATT | TGCTGGTTCT |   | 4939 |   |
| Anolis_carolinensis         | -          | -          | -          | -          | -          | -          | -          | - | -    | - |
| Murine_leukemia_virus       | GTACCCATTG | GGAATCGAC  | TTTACCGAAG | TTAAGCCAGG | GCTGTACGGG | TACAAGTACC | TCCTGGTGTT |   | 4914 |   |
| Phascolarctos_cinereus      | GCGTGTATTG | GGAAGTAGAC | TTCACAGAGG | TTAAGCCTGG | CCGGTATGTT | AATAGATATT | TGCTAGTGTT |   | 4723 |   |
| Estrildidae                 | -          | -          | -          | -          | -          | -          | -          | - | -    | - |
| Xenopus_Silurana_tropicalis | -          | -          | -          | -          | -          | -          | -          | - | -    | - |
| L_XT                        | TNNNGAGGAT | TAANNTAGAT | TGTATNCANN | TANCCAAATG | TACTNCNTTA | TTTANTNGTA | NACANNAANA |   | 5008 |   |
| Takifugu_rubripes           | -          | -          | -          | -          | -          | -          | -          | - | -    | - |
| Bos_taurus                  | -          | -          | -          | -          | -          | -          | -          | - | -    | - |
| Homo_sapiens                | -          | -          | -          | -          | -          | -          | -          | - | -    | - |
| Microcebus_murinus          | -          | -          | -          | -          | -          | -          | -          | - | -    | - |
| Myotis_lucifugus            | -          | -          | -          | -          | -          | -          | -          | - | -    | - |
| Equus_caballus              | -          | -          | -          | -          | -          | -          | -          | - | -    | - |
| Tupaia_belangeri            | -          | -          | -          | -          | -          | -          | -          | - | -    | - |
| Loxodonta_africana          | -          | -          | -          | -          | -          | -          | -          | - | -    | - |
| Murinae                     | -          | -          | -          | -          | -          | -          | -          | - | -    | - |
| Canis_lupus_familiaris      | -          | -          | -          | -          | -          | -          | -          | - | -    | - |
| Sus_scrofa                  | -          | -          | -          | -          | -          | -          | -          | - | -    | - |
| Choloepus_hoffmanni         | -          | -          | -          | -          | -          | -          | -          | - | -    | - |
| Vicugna_pacos               | -          | -          | -          | -          | -          | -          | -          | - | -    | - |
| Gavialis_gangeticus         | -          | -          | -          | -          | -          | -          | -          | - | -    | - |
| Mammalia                    | -          | -          | -          | -          | -          | -          | -          | - | -    | - |
| Passeroidea                 | -          | -          | -          | -          | -          | -          | -          | - | -    | - |
| Takifugu                    | -          | -          | -          | -          | -          | -          | -          | - | -    | - |
| Pteropus_vampyrus           | -          | -          | -          | -          | -          | -          | -          | - | -    | - |
| Ornithorhynchus             | -          | -          | -          | -          | -          | -          | -          | - | -    | - |
| Oryctolagus_cuniculus       | -          | -          | -          | -          | -          | -          | -          | - | -    | - |
| Gallus_gallus               | -          | -          | -          | -          | -          | -          | -          | - | -    | - |
| Hominidae                   | GAGCGCCACC | TGGTGCCTGC | TTCAAGTGTG | GGAACGAAGG | CCACTGGGCC | TGACAATGCC | CGTACCCGAA |   | 1795 |   |
| Metatheria                  | -          | -          | -          | -          | -          | -          | -          | - | -    | - |
| Rodentia                    | -          | -          | -          | -          | -          | -          | -          | - | -    | - |
| Monodelphis                 | -          | -          | -          | -          | -          | -          | -          | - | -    | - |
| Consensus                   | -          | -          | -          | -          | -          | -          | -          | - | -    | - |
| Conservation                | 100%<br>0% |            |            |            |            |            |            |   |      |   |

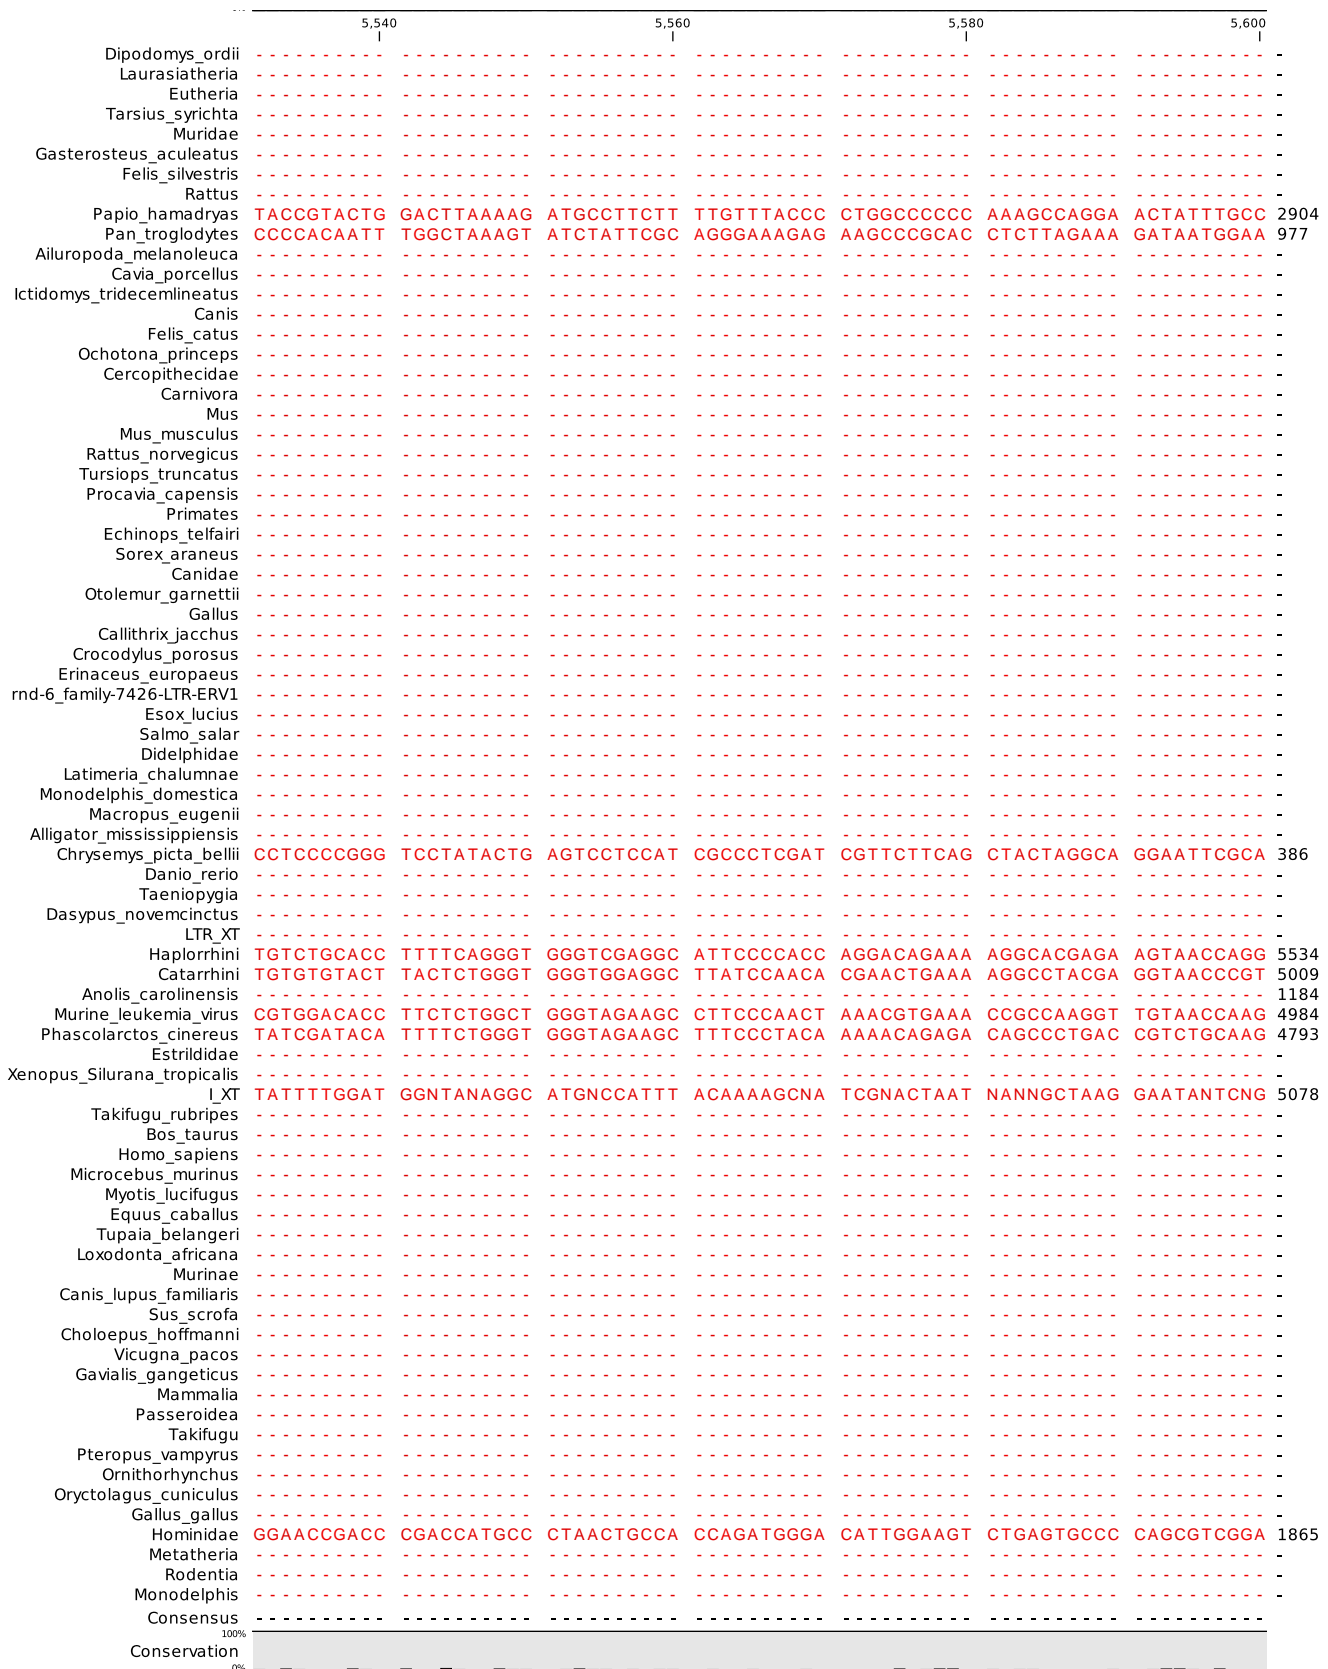

|                             | 5,620      |            |            | 5,640       |            |             | 5,660      |   |   |      |
|-----------------------------|------------|------------|------------|-------------|------------|-------------|------------|---|---|------|
| Dipodomys_ordii             | -          | -          | -          | -           | -          | -           | -          | - | - | -    |
| Laurasiatheria              | -          | -          | -          | -           | -          | -           | -          | - | - | -    |
| Eutheria                    | -          | -          | -          | -           | -          | -           | -          | - | - | -    |
| Tarsius_syrichta            | -          | -          | -          | -           | -          | -           | -          | - | - | -    |
| Muridae                     | -          | -          | -          | -           | -          | -           | -          | - | - | -    |
| Gasterosteus_aculeatus      | -          | -          | -          | -           | -          | -           | -          | - | - | -    |
| Felis_silvestris            | -          | -          | -          | -           | -          | -           | -          | - | - | -    |
| Rattus                      | -          | -          | -          | -           | -          | -           | -          | - | - | -    |
| Papio_hamadryas             | TTTGAGTGGA | AGGACCCTGA | GAGAGGAATC | TCAGGCCA    | ATTGACCTGG | ACTCGACTTC  | CCCAGGGGTT |   |   | 2972 |
| Pan_troglodytes             | GTTTAGAAGT | ACACCCTAGA | TCCAGAGGCT | CCAGGCAGGC  | ACGTGAATGT | CTTTCGTAAA  | TCAGGCAGCC |   |   | 1047 |
| Ailuropoda_melanoleuca      | -          | -          | -          | -           | -          | -           | -          | - | - | -    |
| Cavia_porcellus             | -          | -          | -          | -           | -          | -           | -          | - | - | -    |
| Ictidomys_tridecemlineatus  | -          | -          | -          | -           | -          | -           | -          | - | - | -    |
| Canis                       | -          | -          | -          | -           | -          | -           | -          | - | - | -    |
| Felis_catus                 | -          | -          | -          | -           | -          | -           | -          | - | - | -    |
| Ochotona_princeps           | -          | -          | -          | -           | -          | -           | -          | - | - | -    |
| Cercopithecidae             | -          | -          | -          | -           | -          | -           | -          | - | - | -    |
| Carnivora                   | -          | -          | -          | -           | -          | -           | -          | - | - | -    |
| Mus                         | -          | -          | -          | -           | -          | -           | -          | - | - | -    |
| Mus_musculus                | -          | -          | -          | -           | -          | -           | -          | - | - | -    |
| Rattus_norvegicus           | -          | -          | -          | -           | -          | -           | -          | - | - | -    |
| Tursiops_truncatus          | -          | -          | -          | -           | -          | -           | -          | - | - | -    |
| Procyon_capensis            | -          | -          | -          | -           | -          | -           | -          | - | - | -    |
| Primates                    | -          | -          | -          | -           | -          | -           | -          | - | - | -    |
| Echinops_telfairi           | -          | -          | -          | -           | -          | -           | -          | - | - | -    |
| Sorex_araneus               | -          | -          | -          | -           | -          | -           | -          | - | - | -    |
| Canidae                     | -          | -          | -          | -           | -          | -           | -          | - | - | -    |
| Otomur_garnettii            | -          | -          | -          | -           | -          | -           | -          | - | - | -    |
| Gallus                      | -          | -          | -          | -           | -          | -           | -          | - | - | -    |
| Callithrix_jacchus          | -          | -          | -          | -           | -          | -           | -          | - | - | -    |
| Crocodylus_porosus          | -          | -          | -          | -           | -          | -           | -          | - | - | -    |
| Erinaceus_europaeus         | -          | -          | -          | -           | -          | -           | -          | - | - | -    |
| rnd-6_family-7426-LTR-ERV1  | -          | -          | -          | -           | -          | -           | -          | - | - | -    |
| Esox_lucius                 | -          | -          | -          | -           | -          | -           | -          | - | - | -    |
| Salmo_salar                 | -          | -          | -          | -           | -          | -           | -          | - | - | -    |
| Didelphidae                 | -          | -          | -          | -           | -          | -           | -          | - | - | -    |
| Latimeria_chalumnae         | -          | -          | -          | -           | -          | -           | -          | - | - | -    |
| Monodelphis_domestica       | -          | -          | -          | -           | -          | -           | -          | - | - | -    |
| Macropus_eugenii            | -          | -          | -          | -           | -          | -           | -          | - | - | -    |
| Alligator_mississippiensis  | -          | -          | -          | -           | -          | -           | -          | - | - | -    |
| Chrysemys_picta_belli       | GGTTTTCTCG | AGGCGGCACC | TTAGATTCAA | TCGAGACTGT  | CGAGGAGCGA | AGGTAAGTAC  | CTGGGGAGCA |   |   | 456  |
| Danio_rerio                 | -          | -          | -          | -           | -          | -           | -          | - | - | -    |
| Taeniopygia                 | -          | -          | -          | -           | -          | -           | -          | - | - | -    |
| Dasyus_novemcinctus         | -          | -          | -          | -           | -          | -           | -          | - | - | -    |
| LTR_XT                      | -          | -          | -          | -           | -          | -           | -          | - | - | -    |
| Haplorrhini                 | ATATTATTAA | AAGACATTAT | TCCTAGATTT | GGACTGCCTC  | TAACTTTAGG | CTCGGACAAAC | GGACCAGCTT |   |   | 5604 |
| Catarrhini                  | GTGCTTCTCC | GAGATCTTAT | TCCTAGGTTT | GGACTGCCTC  | TACGAATCGG | CTCAGATAAC  | GGGCGGCGT  |   |   | 5079 |
| Anolis_carolinensis         | -          | -          | -          | -           | -          | -           | -          | - | - | -    |
| Murine_leukemia_virus       | AAGCTATTAG | AAGAAATATT | CCCAAGATTC | GGGATGCCAC  | AGGTATTGGG | TTCCGATAAT  | GGGCCTGCCT |   |   | 5054 |
| Phascolarctos_cinereus      | AAGATACTTG | AGGAAATCCT | ACCTCGTTTT | GGGATCCCTA  | AGGTACTCGG | GTCCGACAAAT | GGCCTGCCT  |   |   | 4863 |
| Estrildidae                 | -          | -          | -          | -           | -          | -           | -          | - | - | -    |
| Xenopus_Silurana_tropicalis | -          | -          | -          | -           | -          | -           | -          | - | - | -    |
| L_XT                        | NCGTTACNGA | NNACACTGAG | ANAGGTANCN | NTANTACAAAN | AAAAGTANTT | GAANAAATNC  | TGNAGNANTA |   |   | 5148 |
| Takifugu_rubripes           | -          | -          | -          | -           | -          | -           | -          | - | - | -    |
| Bos_taurus                  | -          | -          | -          | -           | -          | -           | -          | - | - | -    |
| Homo_sapiens                | -          | -          | -          | -           | -          | -           | -          | - | - | -    |
| Microcebus_murinus          | -          | -          | -          | -           | -          | -           | -          | - | - | -    |
| Myotis_lucifugus            | -          | -          | -          | -           | -          | -           | -          | - | - | -    |
| Equus_caballus              | -          | -          | -          | -           | -          | -           | -          | - | - | -    |
| Tupaia_belangeri            | -          | -          | -          | -           | -          | -           | -          | - | - | -    |
| Loxodonta_africana          | -          | -          | -          | -           | -          | -           | -          | - | - | -    |
| Murinae                     | -          | -          | -          | -           | -          | -           | -          | - | - | -    |
| Canis_lupus_familiaris      | -          | -          | -          | -           | -          | -           | -          | - | - | -    |
| Sus_scrofa                  | -          | -          | -          | -           | -          | -           | -          | - | - | -    |
| Choloepus_hoffmanni         | -          | -          | -          | -           | -          | -           | -          | - | - | -    |
| Vicugna_pacos               | -          | -          | -          | -           | -          | -           | -          | - | - | -    |
| Gavialis_gangeticus         | -          | -          | -          | -           | -          | -           | -          | - | - | -    |
| Mammalia                    | -          | -          | -          | -           | -          | -           | -          | - | - | -    |
| Passeroidea                 | -          | -          | -          | -           | -          | -           | -          | - | - | -    |
| Takifugu                    | -          | -          | -          | -           | -          | -           | -          | - | - | -    |
| Pteropus_vampyrus           | -          | -          | -          | -           | -          | -           | -          | - | - | -    |
| Ornithorhynchus             | -          | -          | -          | -           | -          | -           | -          | - | - | -    |
| Oryctolagus_cuniculus       | -          | -          | -          | -           | -          | -           | -          | - | - | -    |
| Gallus_gallus               | -          | -          | -          | -           | -          | -           | -          | - | - | -    |
| Hominidae                   | GGGTCCACAG | TGCCTCTACG | CTGTGAAAAC | TCCGAGACGA  | CCGGTGGCGC | CTTCCAATTA  | CTCAGCGTGG |   |   | 1935 |
| Metatheria                  | -          | -          | -          | -           | -          | -           | -          | - | - | -    |
| Rodentia                    | -          | -          | -          | -           | -          | -           | -          | - | - | -    |
| Monodelphis                 | -          | -          | -          | -           | -          | -           | -          | - | - | -    |
| Consensus                   | -          | -          | -          | -           | -          | -           | -          | - | - | -    |
| Conservation                | 100%<br>0% |            |            |             |            |             |            |   |   |      |

|                             | 5,680       | 5,700       | 5,720      | 5,740      |            |            |            |      |
|-----------------------------|-------------|-------------|------------|------------|------------|------------|------------|------|
| Dipodomys_ordii             | -----       | -----       | -----      | -----      | -          |            |            |      |
| Laurasiatheria              | -----       | -----       | -----      | -----      | -          |            |            |      |
| Eutheria                    | -----       | -----       | -----      | -----      | -          |            |            |      |
| Tarsius_syrichta            | -----       | -----       | -----      | -----      | -          |            |            |      |
| Muridae                     | GGTCCCANTG  | AGATNCCCAG  | AGACCAGACT | TGGAGACACC | AGGGGTCTCA | TCTCCGGATT | GGGAAGAGCG | 78   |
| Gasterosteus_aculeatus      | -----       | -----       | -----      | -----      | -----      | -----      | -----      | -    |
| Felis_silvestris            | -----       | -----       | -----      | -----      | -----      | -----      | -----      | -    |
| Rattus                      | -----       | -----       | -----      | -----      | -----      | -----      | -----      | -    |
| Papio_hamadryas             | CAAAAACCTCT | CCCACCTCTCT | TCGATGAGGC | TCTCCACAGG | GACCTCACCG | ACTTCCGGAC | CCAGCATCCA | 3042 |
| Pan_troglodytes             | CAGATATTAA  | GAGAAAACCTC | CAGAAATTAG | AGACTTGAGG | AACGGATCAG | ACTCTTAGCC | CAGGTTTAAA | 1117 |
| Ailuropoda_melanoleuca      | -----       | -----       | -----      | -----      | -----      | -----      | -----      | -    |
| Cavia_porcellus             | -----       | -----       | -----      | -----      | -----      | -----      | -----      | -    |
| Ictidomys_tridecemlineatus  | -----       | -----       | -----      | -----      | -----      | -----      | -----      | -    |
| Canis                       | -----       | -----       | -----      | -----      | -----      | -----      | -----      | -    |
| Felis_catus                 | -----       | -----       | -----      | -----      | -----      | -----      | -----      | -    |
| Ochotona_princeps           | -----       | -----       | -----      | -----      | -----      | -----      | -----      | -    |
| Cercopithecidae             | -----       | -----       | -----      | -----      | -----      | -----      | -----      | -    |
| Carnivora                   | -----       | -----       | -----      | -----      | -----      | -----      | -----      | -    |
| Mus                         | -----       | -----       | -----      | -----      | -----      | -----      | -----      | -    |
| Mus_musculus                | -----       | -----       | -----      | -----      | -----      | -----      | -----      | -    |
| Rattus_norvegicus           | -----       | -----       | -----      | -----      | -----      | -----      | -----      | -    |
| Tursiops_truncatus          | -----       | -----       | -----      | -----      | -----      | -----      | -----      | -    |
| Procyon_capensis            | -----       | -----       | -----      | -----      | -----      | -----      | -----      | -    |
| Primates                    | -----       | -----       | -----      | -----      | -----      | -----      | -----      | -    |
| Echinops_telfairi           | -----       | -----       | -----      | -----      | -----      | -----      | -----      | -    |
| Sorex_araneus               | -----       | -----       | -----      | -----      | -----      | -----      | -----      | -    |
| Canidae                     | -----       | -----       | -----      | -----      | -----      | -----      | -----      | -    |
| Otomur_garnettii            | -----       | -----       | -----      | -----      | -----      | -----      | -----      | -    |
| Gallus                      | -----       | -----       | -----      | -----      | -----      | -----      | -----      | -    |
| Callithrix_jacchus          | -----       | -----       | -----      | -----      | -----      | -----      | -----      | -    |
| Crocodylus_porosus          | -----       | -----       | -----      | -----      | -----      | -----      | -----      | -    |
| Erinaceus_europaeus         | -----       | -----       | -----      | -----      | -----      | -----      | -----      | -    |
| rnd-6_family-7426-LTR-ERV1  | -----       | -----       | -----      | -----      | -----      | -----      | -----      | -    |
| Esox_lucius                 | -----       | -----       | -----      | -----      | -----      | -----      | -----      | -    |
| Salmo_salar                 | -----       | -----       | -----      | -----      | -----      | -----      | -----      | -    |
| Didelphidae                 | -----       | -----       | -----      | -----      | -----      | -----      | -----      | -    |
| Latimeria_chalumnae         | -----       | -----       | -----      | -----      | -----      | -----      | -----      | -    |
| Monodelphis_domestica       | -----       | -----       | -----      | -----      | -----      | -----      | -----      | -    |
| Macropus_eugenii            | -----       | -----       | -----      | -----      | -----      | -----      | -----      | -    |
| Alligator_mississippiensis  | -----       | -----       | -----      | -----      | -----      | -----      | -----      | -    |
| Chrysemys_picta_bellii      | GTTAGAGAAC  | GCCCCCGGT   | GATCCGAAGT | ACCTTACGGC | CAACATGGCA | AAAACAGAAA | GAACCGGTCT | 526  |
| Danio_rerio                 | -----       | -----       | -----      | -----      | -----      | -----      | -----      | -    |
| Taeniopygia                 | -----       | -----       | -----      | -----      | -----      | -----      | -----      | -    |
| Dasyus_novemcinctus         | -----       | -----       | -----      | -----      | -----      | -----      | -----      | -    |
| LTR_XT                      | -----       | -----       | -----      | -----      | -----      | -----      | -----      | -    |
| Haplorrhini                 | TTGTGGCAGA  | AGTAGTACAG  | CAACTAACTC | AGATGTTAAA | AATTAATGG  | AAACTGCATA | CAGCCTATCA | 5674 |
| Catarrhini                  | TTGTGGCTGA  | CTTGGTACAG  | AAGACAGCAA | AGGCATTAGG | AATCACTTGG | AAGCTACGTG | CCGCCTACCG | 5149 |
| Anolis_carolinensis         | -----       | -----       | -----      | -----      | -----      | -----      | -----      | 1184 |
| Murine_leukemia_virus       | TCGTCTCCCA  | GGTAAGTCAG  | TCGGTGGCCG | ATTTACTGGG | GATCGATTGG | AAATTACATT | GTGCTTATAG | 5124 |
| Phascolarctos_cinereus      | TCGTTCCTCA  | GGTAAGCCAG  | GGGTGGCCCA | CTCAACTGGG | GATTGATTGG | AAATTACATT | GTGCATATAG | 4933 |
| Estrildidae                 | -----       | -----       | -----      | -----      | -----      | -----      | -----      | -    |
| Xenopus_Silurana_tropicalis | -----       | -----       | -----      | -----      | -----      | -----      | -----      | -    |
| L_XT                        | ANATACACCA  | ACAANAANAC  | TGTANNACC  | NGANGTNCCA | AGCNAANTAG | AAGGAGCTAT | CGGAANTCAA | 5218 |
| Takifugu_rubripes           | -----       | -----       | -----      | -----      | -----      | -----      | -----      | -    |
| Bos_taurus                  | -----       | -----       | -----      | -----      | -----      | -----      | -----      | -    |
| Homo_sapiens                | -----       | -----       | -----      | -----      | -----      | -----      | -----      | -    |
| Microcebus_murinus          | -----       | -----       | -----      | -----      | -----      | -----      | -----      | -    |
| Myotis_lucifugus            | -----       | -----       | -----      | -----      | -----      | -----      | -----      | -    |
| Equus_caballus              | -----       | -----       | -----      | -----      | -----      | -----      | -----      | -    |
| Tupaia_belangeri            | -----       | -----       | -----      | -----      | -----      | -----      | -----      | -    |
| Loxodonta_africana          | -----       | -----       | -----      | -----      | -----      | -----      | -----      | -    |
| Murinae                     | -----       | -----       | -----      | -----      | -----      | -----      | -----      | -    |
| Canis_lupus_familiaris      | -----       | -----       | -----      | -----      | -----      | -----      | -----      | -    |
| Sus_scrofa                  | -----       | -----       | -----      | -----      | -----      | -----      | -----      | -    |
| Choloepus_hoffmanni         | -----       | -----       | -----      | -----      | -----      | -----      | -----      | -    |
| Vicugna_pacos               | -----       | -----       | -----      | -----      | -----      | -----      | -----      | -    |
| Gavialis_gangeticus         | -----       | -----       | -----      | -----      | -----      | -----      | -----      | -    |
| Mammalia                    | -----       | -----       | -----      | -----      | -----      | -----      | -----      | -    |
| Passeroidea                 | -----       | -----       | -----      | -----      | -----      | -----      | -----      | -    |
| Takifugu                    | -----       | -----       | -----      | -----      | -----      | -----      | -----      | -    |
| Pteropus_vampyrus           | -----       | -----       | -----      | -----      | -----      | -----      | -----      | -    |
| Ornithorhynchus             | -----       | -----       | -----      | -----      | -----      | -----      | -----      | -    |
| Oryctolagus_cuniculus       | -----       | -----       | -----      | -----      | -----      | -----      | -----      | -    |
| Gallus_gallus               | -----       | -----       | -----      | -----      | -----      | -----      | -----      | -    |
| Hominidae                   | ACGACGACCG  | AAGAGGCCCA  | GACTCGGGAA | CCCCCTCAC  | TCTTGCCGAG | CCCAGGGTAA | CGCTCCAGGT | 2005 |
| Metatheria                  | -----       | -----       | -----      | -----      | -----      | -----      | -----      | -    |
| Rodentia                    | -----       | -----       | -----      | -----      | -----      | -----      | -----      | -    |
| Monodelphis                 | -----       | -----       | -----      | -----      | -----      | -----      | -----      | -    |
| Consensus                   | -----       | -----       | -----      | -----      | -----      | -----      | -----      | -    |
| Conservation                | 100%        | -----       | -----      | -----      | -----      | -----      | -----      | 0%   |

|                             | 5,760             | 5,780             | 5,800             |                   |                   |                   |                    |      |
|-----------------------------|-------------------|-------------------|-------------------|-------------------|-------------------|-------------------|--------------------|------|
| Dipodomys_ordii             | -----             | -----             | -----             | -                 |                   |                   |                    |      |
| Laurasiatheria              | -----             | -----             | -----             | -                 |                   |                   |                    |      |
| Eutheria                    | -----             | -----             | -----             | -                 |                   |                   |                    |      |
| Tarsius_syrichtha           | -----             | -----             | -----             | -                 |                   |                   |                    |      |
| Muridae                     | <b>CAGTGGTCAA</b> | <b>GGGCCTCCTA</b> | <b>GGGGGTGCTC</b> | <b>AGCCTGAGAT</b> | <b>GTTCCAGGTC</b> | <b>CCCAGGGTTC</b> | <b>CCTTTGATTA</b>  | 148  |
| Gasterosteus_aculeatus      | -----             | -----             | -----             | -----             | -----             | -----             | -----              | -    |
| Felis_silvestris            | -----             | -----             | -----             | -----             | -----             | -----             | -----              | -    |
| Rattus                      | -----             | -----             | -----             | -----             | -----             | -----             | -----              | -    |
| Papio_hamadryas             | <b>GAAGTGACCC</b> | <b>TGCTCCAGTA</b> | <b>TGTAGATGAC</b> | <b>CTCCTCTTGG</b> | <b>CGGCCCCAC</b>  | <b>AAAGAAAGCC</b> | <b>TGCACGCAAG</b>  | 3112 |
| Pan_troglodytes             | <b>AAAGAGATAC</b> | <b>TCAGAGGAAA</b> | <b>AGCAATAGGC</b> | <b>ATAAAATGAC</b> | <b>CAATCCTGGC</b> | <b>AGCAGTGTAC</b> | <b>AGAAAAGCTAA</b> | 1187 |
| Ailuropoda_melanoleuca      | -----             | -----             | -----             | -----             | -----             | -----             | -----              | -    |
| Cavia_porcellus             | -----             | -----             | -----             | -----             | -----             | -----             | -----              | -    |
| Ictidomys_tridecemlineatus  | -----             | -----             | -----             | -----             | -----             | -----             | -----              | -    |
| Canis                       | -----             | -----             | -----             | -----             | -----             | -----             | -----              | -    |
| Felis_catus                 | -----             | -----             | -----             | -----             | -----             | -----             | -----              | -    |
| Ochotona_princeps           | -----             | -----             | -----             | -----             | -----             | -----             | -----              | -    |
| Cercopithecidae             | -----             | -----             | -----             | -----             | -----             | -----             | -----              | -    |
| Carnivora                   | -----             | -----             | -----             | -----             | -----             | -----             | -----              | -    |
| Mus                         | -----             | -----             | -----             | -----             | -----             | -----             | -----              | -    |
| Mus_musculus                | -----             | -----             | -----             | -----             | -----             | -----             | -----              | -    |
| Rattus_norvegicus           | -----             | -----             | -----             | -----             | -----             | -----             | -----              | -    |
| Tursiops_truncatus          | -----             | -----             | -----             | -----             | -----             | -----             | -----              | -    |
| Procapra_capensis           | -----             | -----             | -----             | -----             | -----             | -----             | -----              | -    |
| Primates                    | -----             | -----             | -----             | -----             | -----             | -----             | -----              | -    |
| Echinops_telfairi           | -----             | -----             | -----             | -----             | -----             | -----             | -----              | -    |
| Sorex_araneus               | -----             | -----             | -----             | -----             | -----             | -----             | -----              | -    |
| Canidae                     | -----             | -----             | -----             | -----             | -----             | -----             | -----              | -    |
| Otomur_garnettii            | -----             | -----             | -----             | -----             | -----             | -----             | -----              | -    |
| Gallus                      | -----             | -----             | -----             | -----             | -----             | -----             | -----              | -    |
| Callithrix_jacchus          | -----             | -----             | -----             | -----             | -----             | -----             | -----              | -    |
| Crocodylus_porosus          | -----             | -----             | -----             | -----             | -----             | -----             | -----              | -    |
| Erinaceus_europaeus         | -----             | -----             | -----             | -----             | -----             | -----             | -----              | -    |
| rnd-6_family-7426-LTR-ERV1  | -----             | -----             | -----             | -----             | -----             | -----             | -----              | -    |
| Esox_lucius                 | -----             | -----             | -----             | -----             | -----             | -----             | -----              | -    |
| Salmo_salar                 | -----             | -----             | -----             | -----             | -----             | -----             | -----              | -    |
| Didelphidae                 | -----             | -----             | -----             | -----             | -----             | -----             | -----              | -    |
| Latimeria_chalumnae         | -----             | -----             | -----             | -----             | -----             | -----             | -----              | -    |
| Monodelphis_domestica       | -----             | -----             | -----             | -----             | -----             | -----             | -----              | -    |
| Macropus_eugenii            | -----             | -----             | -----             | -----             | -----             | -----             | -----              | -    |
| Alligator_mississippiensis  | -----             | -----             | -----             | -----             | -----             | -----             | -----              | -    |
| Chrysemys_picta_bellii      | <b>CGTGATGCAA</b> | <b>TCTTACATGG</b> | <b>TAGTTTAGAT</b> | <b>ATTAGATAGA</b> | <b>AAAAGATTTG</b> | <b>GAATGGAATT</b> | <b>ATGCAAAGCA</b>  | 596  |
| Danio_rerio                 | -----             | -----             | -----             | -----             | -----             | -----             | -----              | -    |
| Taeniopygia                 | -----             | -----             | -----             | -----             | -----             | -----             | -----              | -    |
| Dasyus_novemcinctus         | -----             | -----             | -----             | -----             | -----             | -----             | -----              | -    |
| LTR_XT                      | -----             | -----             | -----             | -----             | -----             | -----             | -----              | -    |
| Haplorrhini                 | <b>TCCACAAAGT</b> | <b>TCTGAAAAGG</b> | <b>TTGAAAGGAT</b> | <b>GAACCGGACA</b> | <b>CTGAAACAAC</b> | <b>TGTTGAAGAA</b> | <b>GTTTTGCCAA</b>  | 5744 |
| Catarrhini                  | <b>ACCTCAGAGT</b> | <b>TCCGAAAAGG</b> | <b>TGGAGCGAAT</b> | <b>GAATCGGACT</b> | <b>ATCAAAAATA</b> | <b>GTTTAGGGAA</b> | <b>AGTATGTCAG</b>  | 5219 |
| Anolis_carolinensis         | -----             | -----             | -----             | -----             | -----             | -----             | -----              | 1184 |
| Murine_leukemia_virus       | <b>ACCCAGAGT</b>  | <b>TCAGGTCAGG</b> | <b>TAGAAAAGAT</b> | <b>GAATAGAACC</b> | <b>ATCAAGGAGA</b> | <b>CTTTAACCAA</b> | <b>ATTAACGCTT</b>  | 5194 |
| Phascolarctos_cinereus      | <b>ACCCAGAGC</b>  | <b>TCAGGTCAGG</b> | <b>TAGAAAAGAT</b> | <b>GAATAGGACA</b> | <b>ATTAAGAGA</b>  | <b>CCTTGACAAA</b> | <b>ATTGGCCTTA</b>  | 5003 |
| Estrildidae                 | -----             | -----             | -----             | -----             | -----             | -----             | -----              | -    |
| Xenopus_Silurana_tropicalis | -----             | -----             | -----             | -----             | -----             | -----             | -----              | -    |
| L_XT                        | <b>AAANNTNAG</b>  | <b>TTNGTAANTN</b> | <b>CTGTANNAN</b>  | <b>ATNNAGTTAA</b> | <b>GTTAGGGTAC</b> | <b>AAATTTTNAN</b> | <b>CGNTGCATTG</b>  | 5288 |
| Takifugu_rubripes           | -----             | -----             | -----             | -----             | -----             | -----             | -----              | -    |
| Bos_taurus                  | -----             | -----             | -----             | -----             | -----             | -----             | -----              | -    |
| Homo_sapiens                | -----             | -----             | -----             | -----             | -----             | -----             | -----              | -    |
| Microcebus_murinus          | -----             | -----             | -----             | -----             | -----             | -----             | -----              | -    |
| Myotis_lucifugus            | -----             | -----             | -----             | -----             | -----             | -----             | -----              | -    |
| Equus_caballus              | -----             | -----             | -----             | -----             | -----             | -----             | -----              | -    |
| Tupaia_belangeri            | -----             | -----             | -----             | -----             | -----             | -----             | -----              | -    |
| Loxodonta_africana          | -----             | -----             | -----             | -----             | -----             | -----             | -----              | -    |
| Murinae                     | -----             | -----             | -----             | -----             | -----             | -----             | -----              | -    |
| Canis_lupus_familiaris      | -----             | -----             | -----             | -----             | -----             | -----             | -----              | -    |
| Sus_scrofa                  | -----             | -----             | -----             | -----             | -----             | -----             | -----              | -    |
| Choloepus_hoffmanni         | -----             | -----             | -----             | -----             | -----             | -----             | -----              | -    |
| Vicugna_pacos               | -----             | -----             | -----             | -----             | -----             | -----             | -----              | -    |
| Gavialis_gangeticus         | -----             | -----             | -----             | -----             | -----             | -----             | -----              | -    |
| Mammalia                    | -----             | -----             | -----             | -----             | -----             | -----             | -----              | -    |
| Passeroidea                 | -----             | -----             | -----             | -----             | -----             | -----             | -----              | -    |
| Takifugu                    | -----             | -----             | -----             | -----             | -----             | -----             | -----              | -    |
| Pteropus_vampyrus           | -----             | -----             | -----             | -----             | -----             | -----             | -----              | -    |
| Ornithorhynchus             | -----             | -----             | -----             | -----             | -----             | -----             | -----              | -    |
| Oryctolagus_cuniculus       | -----             | -----             | -----             | -----             | -----             | -----             | -----              | -    |
| Gallus_gallus               | -----             | -----             | -----             | -----             | -----             | -----             | -----              | -    |
| Hominidae                   | <b>AGCGGGTAA</b>  | <b>TCCATATCTT</b> | <b>TTCTCGTGCA</b> | <b>TATGGGGCT</b>  | <b>ACCTATTCTG</b> | <b>TTTTGCCTTC</b> | <b>CTTCGGCGGG</b>  | 2075 |
| Metatheria                  | -----             | -----             | -----             | -----             | -----             | -----             | -----              | -    |
| Rodentia                    | -----             | -----             | -----             | -----             | -----             | -----             | -----              | -    |
| Monodelphis                 | -----             | -----             | -----             | -----             | -----             | -----             | -----              | -    |
| Consensus                   | -----             | -----             | -----             | -----             | -----             | -----             | -----              | -    |
| Conservation                | 100%              | -----             | -----             | -----             | -----             | -----             | -----              | 0%   |

|                             | 5,820             | 5,840             | 5,860             | 5,880             |                   |                   |                   |                   |      |
|-----------------------------|-------------------|-------------------|-------------------|-------------------|-------------------|-------------------|-------------------|-------------------|------|
| Dipodomys_ordii             | -----             | -----             | -----             | -----             | -                 |                   |                   |                   |      |
| Laurasiatheria              | -----             | -----             | -----             | -----             | -                 |                   |                   |                   |      |
| Eutheria                    | -----             | -----             | -----             | -----             | -                 |                   |                   |                   |      |
| Tarsius_syrichta            | -----             | -----             | -----             | -----             | -                 |                   |                   |                   |      |
| Muridae                     | <b>ATCGCCACCT</b> | <b>AGGCCTTCAG</b> | <b>AGAGGTCTGA</b> | <b>CACCTCCACC</b> | <b>CCAAAAGGAA</b> | <b>ACAAATTAGA</b> | <b>AAGCCGCCTG</b> | 218               |      |
| Gasterosteus_aculeatus      | -----             | -----             | -----             | -----             | -----             | -----             | -----             | -                 |      |
| Felis_silvestris            | -----             | -----             | -----             | -----             | -----             | -----             | -----             | -                 |      |
| Rattus                      | -----             | -----             | -----             | -----             | -----             | -----             | -----             | -                 |      |
| Papio_hamadryas             | <b>GTACTAGGCA</b> | <b>TCTACTCCAG</b> | <b>GAAGTAGGTC</b> | <b>AGAAAGGATA</b> | <b>CCGGGCATCT</b> | <b>GCCAAGAAGG</b> | <b>CACAAATTTG</b> | 3182              |      |
| Pan_troglodytes             | <b>AGACCAAGGG</b> | <b>CGGCAAAATG</b> | <b>AAAGACCAAT</b> | <b>GTGCCTATTG</b> | <b>AAGGGGCATG</b> | <b>GGTAAGAGAC</b> | <b>TGCCAAAACA</b> | 1257              |      |
| Ailuropoda_melanoleuca      | -----             | -----             | -----             | -----             | -----             | -----             | -----             | -                 |      |
| Cavia_porcellus             | -----             | -----             | -----             | -----             | -----             | -----             | -----             | -                 |      |
| Ictidomys_tridecemlineatus  | -----             | -----             | -----             | -----             | -----             | -----             | -----             | -                 |      |
| Canis                       | -----             | -----             | -----             | -----             | -----             | -----             | -----             | -                 |      |
| Felis_catus                 | -----             | -----             | -----             | -----             | -----             | -----             | -----             | -                 |      |
| Ochotona_princeps           | -----             | -----             | -----             | -----             | -----             | -----             | -----             | -                 |      |
| Cercopithecidae             | -----             | -----             | -----             | -----             | -----             | -----             | -----             | -                 |      |
| Carnivora                   | -----             | -----             | -----             | -----             | -----             | -----             | -----             | -                 |      |
| Mus                         | -----             | -----             | -----             | -----             | -----             | -----             | -----             | -                 |      |
| Mus_musculus                | -----             | -----             | -----             | -----             | -----             | -----             | -----             | -                 |      |
| Rattus_norvegicus           | -----             | -----             | -----             | -----             | -----             | -----             | -----             | -                 |      |
| Tursiops_truncatus          | -----             | -----             | -----             | -----             | -----             | -----             | -----             | -                 |      |
| Procapra_capensis           | -----             | -----             | -----             | -----             | -----             | -----             | -----             | -                 |      |
| Primates                    | -----             | -----             | -----             | -----             | -----             | -----             | -----             | -                 |      |
| Echinops_telfairi           | -----             | -----             | -----             | -----             | -----             | -----             | -----             | -                 |      |
| Sorex_araneus               | -----             | -----             | -----             | -----             | -----             | -----             | -----             | -                 |      |
| Canidae                     | -----             | -----             | -----             | -----             | -----             | -----             | -----             | -                 |      |
| Otomur_garnettii            | -----             | -----             | -----             | -----             | -----             | -----             | -----             | -                 |      |
| Gallus                      | -----             | -----             | -----             | -----             | -----             | -----             | -----             | -                 |      |
| Callithrix_jacchus          | -----             | -----             | -----             | -----             | -----             | -----             | -----             | -                 |      |
| Crocodylus_porosus          | -----             | -----             | -----             | -----             | -----             | -----             | -----             | -                 |      |
| Erinaceus_europaeus         | -----             | -----             | -----             | -----             | -----             | -----             | -----             | -                 |      |
| rnd-6_family-7426-LTR-ERV1  | -----             | -----             | -----             | -----             | -----             | -----             | -----             | -                 |      |
| Esox_lucius                 | -----             | -----             | -----             | -----             | -----             | -----             | -----             | -                 |      |
| Salmo_salar                 | -----             | -----             | -----             | -----             | -----             | -----             | -----             | -                 |      |
| Didelphidae                 | -----             | -----             | -----             | -----             | -----             | -----             | -----             | -                 |      |
| Latimeria_chalumnae         | -----             | -----             | -----             | -----             | -----             | -----             | -----             | -                 |      |
| Monodelphis_domestica       | -----             | -----             | -----             | -----             | -----             | -----             | -----             | -                 |      |
| Macropus_eugenii            | -----             | -----             | -----             | -----             | -----             | -----             | -----             | -                 |      |
| Alligator_mississippiensis  | -----             | -----             | -----             | -----             | -----             | -----             | -----             | -                 |      |
| Chrysemys_picta_bellii      | <b>CCTAGAGAGG</b> | <b>AAAAGAAAAC</b> | <b>AAAAATATGG</b> | <b>CACGGGAAGG</b> | <b>GAGGGGGGGA</b> | <b>GTGGGGGAGG</b> | <b>GGTAACAGTT</b> | 666               |      |
| Danio_rerio                 | -----             | -----             | -----             | -----             | -----             | -----             | -----             | -                 |      |
| Taeniopygia                 | -----             | -----             | -----             | -----             | -----             | -----             | -----             | -                 |      |
| Dasyus_novemcinctus         | -----             | -----             | -----             | -----             | -----             | -----             | -----             | -                 |      |
| LTR_XT                      | -----             | -----             | -----             | -----             | -----             | -----             | -----             | -                 |      |
| Haplorrhini                 | <b>GAGACTCATT</b> | <b>TAAGG---</b>   | <b>TG</b>         | <b>GGATCAGGTA</b> | <b>TTGCCCATGG</b> | <b>TCCTTCTCCG</b> | <b>AGTCAGGTGT</b> | <b>ACCCCTACTA</b> | 5811 |
| Catarrhini                  | <b>GAAACAGGAT</b> | <b>TAAAG---</b>   | <b>CG</b>         | <b>GATACAGGCC</b> | <b>CTTCCTATGG</b> | <b>TATTGTTTAA</b> | <b>AATTAGATGC</b> | <b>ACTCCTTCTA</b> | 5286 |
| Anolis_carolinensis         | -----             | -----             | -----             | -----             | -----             | -----             | -----             | -----             | 1184 |
| Murine_leukemia_virus       | <b>GCAGCTGGCA</b> | <b>CTAGAGACTG</b> | <b>GGTACTCCTA</b> | <b>CTCCCCTTGG</b> | <b>CCCTCTACCG</b> | <b>AGCCCGGAAT</b> | <b>ACTCCGGGCC</b> | 5264              |      |
| Phascolarctos_cinereus      | <b>GAGACCGGTG</b> | <b>GAAAAGACTG</b> | <b>GGTGACCCCT</b> | <b>CTCCCTTTGG</b> | <b>CGCTACTTAG</b> | <b>GGCCCGGAAT</b> | <b>ACCCCTGGCC</b> | 5073              |      |
| Estrildidae                 | -----             | -----             | -----             | -----             | -----             | -----             | -----             | -                 |      |
| Xenopus_Silurana_tropicalis | <b>TTANCTANGA</b> | <b>GACACACTCC</b> | <b>NATGGATCCC</b> | <b>NAGNANTTAT</b> | <b>CTNCTTNTGA</b> | <b>NTTACNGTTT</b> | <b>GGTANANCAA</b> | 5358              |      |
| L_XT                        | -----             | -----             | -----             | -----             | -----             | -----             | -----             | -                 |      |
| Takifugu_rubripes           | -----             | -----             | -----             | -----             | -----             | -----             | -----             | -                 |      |
| Bos_taurus                  | -----             | -----             | -----             | -----             | -----             | -----             | -----             | -                 |      |
| Homo_sapiens                | -----             | -----             | -----             | -----             | -----             | -----             | -----             | -                 |      |
| Microcebus_murinus          | -----             | -----             | -----             | -----             | -----             | -----             | -----             | -                 |      |
| Myotis_lucifugus            | -----             | -----             | -----             | -----             | -----             | -----             | -----             | -                 |      |
| Equus_caballus              | -----             | -----             | -----             | -----             | -----             | -----             | -----             | -                 |      |
| Tupaia_belangeri            | -----             | -----             | -----             | -----             | -----             | -----             | -----             | -                 |      |
| Loxodonta_africana          | -----             | -----             | -----             | -----             | -----             | -----             | -----             | -                 |      |
| Murinae                     | -----             | -----             | -----             | -----             | -----             | -----             | -----             | -                 |      |
| Canis_lupus_familiaris      | -----             | -----             | -----             | -----             | -----             | -----             | -----             | -                 |      |
| Sus_scrofa                  | -----             | -----             | -----             | -----             | -----             | -----             | -----             | -                 |      |
| Choloepus_hoffmanni         | -----             | -----             | -----             | -----             | -----             | -----             | -----             | -                 |      |
| Vicugna_pacos               | -----             | -----             | -----             | -----             | -----             | -----             | -----             | -                 |      |
| Gavialis_gangeticus         | -----             | -----             | -----             | -----             | -----             | -----             | -----             | -                 |      |
| Mammalia                    | -----             | -----             | -----             | -----             | -----             | -----             | -----             | -                 |      |
| Passeroidea                 | -----             | -----             | -----             | -----             | -----             | -----             | -----             | -                 |      |
| Takifugu                    | -----             | -----             | -----             | -----             | -----             | -----             | -----             | -                 |      |
| Pteropus_vampyrus           | -----             | -----             | -----             | -----             | -----             | -----             | -----             | -                 |      |
| Ornithorhynchus             | -----             | -----             | -----             | -----             | -----             | -----             | -----             | -                 |      |
| Oryctolagus_cuniculus       | -----             | -----             | -----             | -----             | -----             | -----             | -----             | -                 |      |
| Gallus_gallus               | -----             | -----             | -----             | -----             | -----             | -----             | -----             | -                 |      |
| Hominidae                   | <b>CCCAGTTTCC</b> | <b>CGTCCCCTGG</b> | <b>CACGGTAGTG</b> | <b>GGGATTGACG</b> | <b>GTACCCCTTC</b> | <b>CACCCATCGT</b> | <b>CAGACCCCCC</b> | 2145              |      |
| Metatheria                  | -----             | -----             | -----             | -----             | -----             | -----             | -----             | -                 |      |
| Rodentia                    | -----             | -----             | -----             | -----             | -----             | -----             | -----             | -                 |      |
| Monodelphis                 | -----             | -----             | -----             | -----             | -----             | -----             | -----             | -                 |      |
| Consensus                   | -----             | -----             | -----             | -----             | -----             | -----             | -----             | -                 |      |
| Conservation                | 100%              | -----             |                   |                   |                   |                   |                   | 0%                |      |



|                             | 5,900             | 5,920             | 5,940             |                   |                   |                   |                   |                   |      |
|-----------------------------|-------------------|-------------------|-------------------|-------------------|-------------------|-------------------|-------------------|-------------------|------|
| Dipodomys_ordii             | -----             | -----             | -----             | -                 |                   |                   |                   |                   |      |
| Laurasiatheria              | -----             | -----             | -----             | -                 |                   |                   |                   |                   |      |
| Eutheria                    | -----             | -----             | -----             | -                 |                   |                   |                   |                   |      |
| Tarsius_syrichtha           | -----             | -----             | -----             | -                 |                   |                   |                   |                   |      |
| Muridae                     | <b>GTCTGTACC</b>  | <b>TCCGGAGGTA</b> | <b>AGTCCTGTTA</b> | <b>AGGCACCTTC</b> | <b>GTTTAGAAAA</b> | <b>GTAGGAGAGG</b> | <b>TCNGGTNGGG</b> | 288               |      |
| Gasterosteus_aculeatus      | -----             | -----             | -----             | -----             | -----             | -----             | -----             | -                 |      |
| Felis_silvestris            | -----             | -----             | -----             | -----             | -----             | -----             | -----             | -                 |      |
| Rattus                      | -----             | -----             | -----             | -----             | -----             | -----             | -----             | -                 |      |
| Papio_hamadryas             | <b>TCAGACCAAG</b> | <b>GTAACCTACC</b> | <b>TGGGGTACAT</b> | <b>ACTGAGTGAG</b> | <b>GGAAAA</b>     | <b>AGGTGGCTC</b>  | <b>ACCCCTGGGC</b> | 3247              |      |
| Pan_troglodytes             | <b>GAGGACGGAG</b> | <b>CCAGTCCCCT</b> | <b>GTAGACAGAT</b> | <b>AGGGGCGGGT</b> | <b>TCGACCCCCC</b> | <b>CGACCTGGTA</b> | <b>ACTTGTGGGG</b> | 1327              |      |
| Ailuropoda_melanoleuca      | -----             | -----             | -----             | -----             | -----             | -----             | -----             | -                 |      |
| Cavia_porcellus             | -----             | -----             | -----             | -----             | -----             | -----             | -----             | -                 |      |
| Ictidomys_tridecemlineatus  | -----             | -----             | -----             | -----             | -----             | -----             | -----             | -                 |      |
| Canis                       | -----             | -----             | -----             | -----             | -----             | -----             | -----             | -                 |      |
| Felis_catus                 | -----             | -----             | -----             | -----             | -----             | -----             | -----             | -                 |      |
| Ochotona_princeps           | -----             | -----             | -----             | -----             | -----             | -----             | -----             | -                 |      |
| Cercopithecidae             | -----             | -----             | -----             | -----             | -----             | -----             | -----             | -                 |      |
| Carnivora                   | -----             | -----             | -----             | -----             | -----             | -----             | -----             | -                 |      |
| Mus                         | -----             | -----             | -----             | -----             | -----             | -----             | -----             | -                 |      |
| Mus_musculus                | -----             | -----             | -----             | -----             | -----             | -----             | -----             | -                 |      |
| Rattus_norvegicus           | -----             | -----             | -----             | -----             | -----             | -----             | -----             | -                 |      |
| Tursiops_truncatus          | -----             | -----             | -----             | -----             | -----             | -----             | -----             | -                 |      |
| Procapra_capensis           | -----             | -----             | -----             | -----             | -----             | -----             | -----             | -                 |      |
| Primates                    | -----             | -----             | -----             | -----             | -----             | -----             | -----             | -                 |      |
| Echinops_telfairi           | -----             | -----             | -----             | -----             | -----             | -----             | -----             | -                 |      |
| Sorex_araneus               | -----             | -----             | -----             | -----             | -----             | -----             | -----             | -                 |      |
| Canidae                     | -----             | -----             | -----             | -----             | -----             | -----             | -----             | -                 |      |
| Otomur_garnettii            | -----             | -----             | -----             | -----             | -----             | -----             | -----             | -                 |      |
| Gallus                      | -----             | -----             | -----             | -----             | -----             | -----             | -----             | -                 |      |
| Callithrix_jacchus          | -----             | -----             | -----             | -----             | -----             | -----             | -----             | -                 |      |
| Crocodylus_porosus          | -----             | -----             | -----             | -----             | -----             | -----             | -----             | -                 |      |
| Erinaceus_europaeus         | -----             | -----             | -----             | -----             | -----             | -----             | -----             | -                 |      |
| rnd-6_family-7426-LTR-ERV1  | -----             | -----             | -----             | -----             | -----             | -----             | -----             | -                 |      |
| Esox_lucius                 | -----             | -----             | -----             | -----             | -----             | -----             | -----             | -                 |      |
| Salmo_salar                 | -----             | -----             | -----             | -----             | -----             | -----             | -----             | -                 |      |
| Didelphidae                 | -----             | -----             | -----             | -----             | -----             | -----             | -----             | -                 |      |
| Latimeria_chalumnae         | -----             | -----             | -----             | -----             | -----             | -----             | -----             | -                 |      |
| Monodelphis_domestica       | -----             | -----             | -----             | -----             | -----             | -----             | -----             | -                 |      |
| Macropus_eugenii            | -----             | -----             | -----             | -----             | -----             | -----             | -----             | -                 |      |
| Alligator_mississippiensis  | -----             | -----             | -----             | -----             | -----             | -----             | -----             | -                 |      |
| Chrysemys_picta_bellii      | <b>GCATTGGGGA</b> | <b>GGGACATGGA</b> | <b>AAAATGAGTG</b> | <b>CCCAGGGAGC</b> | <b>GCAACAGGGG</b> | <b>CGGGGATCTG</b> | <b>CCCAACCATA</b> | 736               |      |
| Danio_rerio                 | -----             | -----             | -----             | -----             | -----             | -----             | -----             | -                 |      |
| Taeniopygia                 | -----             | -----             | -----             | -----             | -----             | -----             | -----             | -                 |      |
| Dasybus_novemcinctus        | -----             | -----             | -----             | -----             | -----             | -----             | -----             | -                 |      |
| LTR_XT                      | -----             | -----             | -----             | -----             | -----             | -----             | -----             | -                 |      |
| Haplorrhini                 | <b>AATTAACCGG</b> | <b>GTATTCACCC</b> | <b>TATGAGATAG</b> | <b>TGTATGGCCG</b> | <b>ACCACCCCCA</b> | <b>CTCATA</b>     | <b>TCTCAGGTAA</b> | 5877              |      |
| Catarrhini                  | <b>AGAAAACAGG</b> | <b>ATACTCCCCT</b> | <b>TATGAAATAC</b> | <b>TGTATCATAG</b> | <b>GCCTCCTCCT</b> | <b>ATACTA</b>     | <b>CGGGAGCTTC</b> | 5352              |      |
| Anolis_carolinensis         | -----             | -----             | -----             | -----             | -----             | -----             | -----             | 1184              |      |
| Murine_leukemia_virus       | <b>CCCA</b>       | <b>TGG</b>        | <b>ACTTACTCCG</b> | <b>TATGAAATTC</b> | <b>TGTATGGGGC</b> | <b>ACCCCCGCCC</b> | <b>CTTGTCAATT</b> | <b>TTCATGATCC</b> | 5331 |
| Phascolarctos_cinereus      | <b>AGTT</b>       | <b>TGG</b>        | <b>CCTGACTCCT</b> | <b>TATGAGATTC</b> | <b>TTCATGGGGG</b> | <b>GCCGCCCCCT</b> | <b>GTACTTGCCT</b> | <b>CTGGGGAAGT</b> | 5140 |
| Estrildidae                 | -----             | -----             | -----             | -----             | -----             | -----             | -----             | -                 |      |
| Xenopus_Silurana_tropicalis | -----             | -----             | -----             | -----             | -----             | -----             | -----             | -                 |      |
| L_XT                        | <b>TATANACTAG</b> | <b>NTTGCTTNTT</b> | <b>NGACANTATT</b> | <b>NNTTGGAGGA</b> | <b>ACATGACTTC</b> | <b>TNNAACTGAC</b> | <b>TATGTTAACC</b> | 5428              |      |
| Takifugu_rubripes           | -----             | -----             | -----             | -----             | -----             | -----             | -----             | -                 |      |
| Bos_taurus                  | -----             | -----             | -----             | -----             | -----             | -----             | -----             | -                 |      |
| Homo_sapiens                | -----             | -----             | -----             | -----             | -----             | -----             | -----             | -                 |      |
| Microcebus_murinus          | -----             | -----             | -----             | -----             | -----             | -----             | -----             | -                 |      |
| Myotis_lucifugus            | -----             | -----             | -----             | -----             | -----             | -----             | -----             | -                 |      |
| Equus_caballus              | -----             | -----             | -----             | -----             | -----             | -----             | -----             | -                 |      |
| Tupaia_belangeri            | -----             | -----             | -----             | -----             | -----             | -----             | -----             | -                 |      |
| Loxodonta_africana          | -----             | -----             | -----             | -----             | -----             | -----             | -----             | -                 |      |
| Murinae                     | -----             | -----             | -----             | -----             | -----             | -----             | -----             | -                 |      |
| Canis_lupus_familiaris      | -----             | -----             | -----             | -----             | -----             | -----             | -----             | -                 |      |
| Sus_scrofa                  | -----             | -----             | -----             | -----             | -----             | -----             | -----             | -                 |      |
| Choloepus_hoffmanni         | -----             | -----             | -----             | -----             | -----             | -----             | -----             | -                 |      |
| Vicugna_pacos               | -----             | -----             | -----             | -----             | -----             | -----             | -----             | -                 |      |
| Gavialis_gangeticus         | -----             | -----             | -----             | -----             | -----             | -----             | -----             | -                 |      |
| Mammalia                    | -----             | -----             | -----             | -----             | -----             | -----             | -----             | -                 |      |
| Passeroidea                 | -----             | -----             | -----             | -----             | -----             | -----             | -----             | -                 |      |
| Takifugu                    | -----             | -----             | -----             | -----             | -----             | -----             | -----             | -                 |      |
| Pteropus_vampyrus           | -----             | -----             | -----             | -----             | -----             | -----             | -----             | -                 |      |
| Ornithorhynchus             | -----             | -----             | -----             | -----             | -----             | -----             | -----             | -                 |      |
| Oryctolagus_cuniculus       | -----             | -----             | -----             | -----             | -----             | -----             | -----             | -                 |      |
| Gallus_gallus               | -----             | -----             | -----             | -----             | -----             | -----             | -----             | -                 |      |
| Hominidae                   | <b>CATTGTCTTG</b> | <b>CCGGCTGGAC</b> | <b>GACACTCTCA</b> | <b>TCTCCATTCC</b> | <b>CTTCCTCATT</b> | <b>ATCCCTTCCT</b> | <b>GTCCCGTCCC</b> | 2215              |      |
| Metatheria                  | -----             | -----             | -----             | -----             | -----             | -----             | -----             | -                 |      |
| Rodentia                    | -----             | -----             | -----             | -----             | -----             | -----             | -----             | -                 |      |
| Monodelphis                 | -----             | -----             | -----             | -----             | -----             | -----             | -----             | -                 |      |
| Consensus                   | -----             | -----             | -----             | -----             | -----             | -----             | -----             | -                 |      |
| Conservation                | 100%              | -----             | -----             | -----             | -----             | -----             | -----             | 0%                |      |

|                             | 5,960             | 5,980             | 6,000             | 6,020             |                   |                   |                    |                    |      |
|-----------------------------|-------------------|-------------------|-------------------|-------------------|-------------------|-------------------|--------------------|--------------------|------|
| Dipodomys_ordii             | -----             | -----             | -----             | -----             | -                 |                   |                    |                    |      |
| Laurasiatheria              | -----             | -----             | -----             | -----             | -                 |                   |                    |                    |      |
| Eutheria                    | -----             | -----             | -----             | -----             | -                 |                   |                    |                    |      |
| Tarsius_syrichtha           | -----             | -----             | -----             | -----             | -                 |                   |                    |                    |      |
| Muridae                     | <b>CCGCTGATCC</b> | <b>AGTGTCTGGG</b> | <b>ATCCATGTGA</b> | <b>GATGTCACTG</b> | <b>GATCCTTCTG</b> | <b>TCTGTTCAAG</b> | <b>TGTATGAATG</b>  | 358                |      |
| Gasterosteus_aculeatus      | -----             | -----             | -----             | -----             | -----             | -----             | -----              | 15                 |      |
| Felis_silvestris            | -----             | -----             | -----             | -----             | -----             | -----             | -----              | -                  |      |
| Rattus                      | -----             | -----             | -----             | -----             | -----             | -----             | -----              | -                  |      |
| Papio_hamadryas             | <b>GCATAGAGAC</b> | <b>TGTGGCTCGC</b> | <b>ATCCACC</b>    | <b>CGCGGAATCC</b> | <b>CAGAGAGGTG</b> | <b>CGTGAATTCC</b> | <b>TGGGAAGTGC</b>  | 3317               |      |
| Pan_troglodytes             | <b>GTCCCCAGTC</b> | <b>AGTTCTGTGA</b> | <b>ACGGGCCAGC</b> | <b>AGTGTCTG</b>   | <b>GAGAAAAA</b>   | <b>AGTAAAAGAT</b> | <b>TTTTCCGCTT</b>  | 1397               |      |
| Ailuropoda_melanoleuca      | -----             | -----             | -----             | -----             | -----             | -----             | -----              | -                  |      |
| Cavia_porcellus             | -----             | -----             | -----             | -----             | -----             | -----             | -----              | -                  |      |
| Ictidomys_tridecemlineatus  | -----             | -----             | -----             | -----             | -----             | -----             | -----              | -                  |      |
| Canis                       | -----             | -----             | -----             | -----             | -----             | -----             | -----              | -                  |      |
| Felis_catus                 | -----             | -----             | -----             | -----             | -----             | -----             | -----              | -                  |      |
| Ochotona_princeps           | -----             | -----             | -----             | -----             | -----             | -----             | -----              | -                  |      |
| Cercopithecidae             | -----             | -----             | -----             | -----             | -----             | -----             | -----              | -                  |      |
| Carnivora                   | -----             | -----             | -----             | -----             | -----             | -----             | -----              | -                  |      |
| Mus                         | -----             | -----             | -----             | -----             | -----             | -----             | -----              | -                  |      |
| Mus_musculus                | -----             | -----             | -----             | -----             | -----             | -----             | -----              | -                  |      |
| Rattus_norvegicus           | -----             | -----             | -----             | -----             | -----             | -----             | -----              | -                  |      |
| Tursiops_truncatus          | -----             | -----             | -----             | -----             | -----             | -----             | -----              | -                  |      |
| Procyon_capensis            | -----             | -----             | -----             | -----             | -----             | -----             | -----              | -                  |      |
| Primates                    | -----             | -----             | -----             | -----             | -----             | -----             | -----              | -                  |      |
| Echinops_telfairi           | -----             | -----             | -----             | -----             | -----             | -----             | -----              | -                  |      |
| Sorex_araneus               | -----             | -----             | -----             | -----             | -----             | -----             | -----              | -                  |      |
| Canidae                     | -----             | -----             | -----             | -----             | -----             | -----             | -----              | -                  |      |
| Otomomys_garnettii          | -----             | -----             | -----             | -----             | -----             | -----             | -----              | -                  |      |
| Gallus                      | -----             | -----             | -----             | -----             | -----             | -----             | -----              | -                  |      |
| Callithrix_jacchus          | -----             | -----             | -----             | -----             | -----             | -----             | -----              | -                  |      |
| Crocodylus_porosus          | -----             | -----             | -----             | -----             | -----             | -----             | -----              | -                  |      |
| Erinaceus_europaeus         | -----             | -----             | -----             | -----             | -----             | -----             | -----              | -                  |      |
| rnd-6_family-7426-LTR-ERV1  | -----             | -----             | -----             | -----             | -----             | -----             | -----              | -                  |      |
| Esox_lucius                 | -----             | -----             | -----             | -----             | -----             | -----             | -----              | -                  |      |
| Salmo_salar                 | -----             | -----             | -----             | -----             | -----             | -----             | -----              | -                  |      |
| Didelphidae                 | -----             | -----             | -----             | -----             | -----             | -----             | -----              | -                  |      |
| Latimeria_chalumnae         | -----             | -----             | -----             | -----             | -----             | -----             | -----              | -                  |      |
| Monodelphis_domestica       | -----             | -----             | -----             | -----             | -----             | -----             | -----              | -                  |      |
| Macropus_eugenii            | -----             | -----             | -----             | -----             | -----             | -----             | -----              | -                  |      |
| Alligator_mississippiensis  | -----             | -----             | -----             | -----             | -----             | -----             | -----              | -                  |      |
| Chrysemys_picta_bellii      | <b>AAGGGGTGTT</b> | <b>GAATGATTTG</b> | <b>TGACTGGAGC</b> | <b>CCGCGTAACC</b> | <b>ACCCTTCGTC</b> | <b>CGGCAATCTA</b> | <b>CGGTGGGACA</b>  | 806                |      |
| Danio_rerio                 | -----             | -----             | -----             | -----             | -----             | -----             | -----              | -                  |      |
| Taeniopygia                 | -----             | -----             | -----             | -----             | -----             | -----             | -----              | -                  |      |
| Dasyus_novemcinctus         | -----             | -----             | -----             | -----             | -----             | -----             | -----              | -                  |      |
| LTR_XT                      | -----             | -----             | -----             | -----             | -----             | -----             | -----              | -                  |      |
| Haplorrhini                 | <b>AAGGAGATTT</b> | <b>AAAGGAAATT</b> | <b>GGAGA</b>      | <b>AACTGA</b>     | <b>CCCTAAGAAG</b> | <b>ACAAATGCAG</b> | <b>GCATTAGGTG</b>  | <b>AGGTAAATGCA</b> | 5947 |
| Catarrhini                  | <b>CAGGCACTCC</b> | <b>CCGAGAGTTA</b> | <b>GGTGA</b>      | <b>AATTTG</b>     | <b>AATTACAGCG</b> | <b>ACAGCTACAG</b> | <b>GCTTTAGGAA</b>  | <b>AAATTACACA</b>  | 5422 |
| Anolis_carolinensis         | -----             | -----             | -----             | -----             | -----             | -----             | -----              | 1184               |      |
| Murine_leukemia_virus       | <b>TG-AAATGTC</b> | <b>AAAGTTAACT</b> | <b>AATAGTCCCT</b> | <b>CTCTCCAAGC</b> | <b>TCACCTACAG</b> | <b>GCCTCCAAG</b>  | <b>CAGTACAACG</b>  | 5400               |      |
| Phascolarctos_cinereus      | <b>CGTGGGTCT</b>  | <b>AATGGTGATT</b> | <b>TTTT-TCCC</b>  | <b>TTCTATTTAC</b> | <b>CCACTTGAAG</b> | <b>GCTTTAGAGG</b> | <b>TTGTGAGGAC</b>  | 5209               |      |
| Estrildidae                 | -----             | -----             | -----             | -----             | -----             | -----             | -----              | -                  |      |
| Xenopus_Silurana_tropicalis | -----             | -----             | -----             | -----             | -----             | -----             | -----              | -                  |      |
| L_XT                        | <b>ANATNTATAN</b> | <b>GCAGCTNACT</b> | <b>AANCTANATG</b> | <b>GANAACNCTT</b> | <b>CTNCNTTTTA</b> | <b>ACANATACAG</b> | <b>AGACAGTATT</b>  | 5498               |      |
| Takifugu_rubripes           | -----             | -----             | -----             | -----             | -----             | -----             | -----              | -                  |      |
| Bos_taurus                  | -----             | -----             | -----             | -----             | -----             | -----             | -----              | -                  |      |
| Homo_sapiens                | -----             | -----             | -----             | -----             | -----             | -----             | -----              | -                  |      |
| Microcebus_murinus          | -----             | -----             | -----             | -----             | -----             | -----             | -----              | -                  |      |
| Myotis_lucifugus            | -----             | -----             | -----             | -----             | -----             | -----             | -----              | -                  |      |
| Equus_caballus              | -----             | -----             | -----             | -----             | -----             | -----             | -----              | -                  |      |
| Tupaia_belangeri            | -----             | -----             | -----             | -----             | -----             | -----             | -----              | -                  |      |
| Loxodonta_africana          | -----             | -----             | -----             | -----             | -----             | -----             | -----              | -                  |      |
| Murinae                     | -----             | -----             | -----             | -----             | -----             | -----             | -----              | -                  |      |
| Canis_lupus_familiaris      | -----             | -----             | -----             | -----             | -----             | -----             | -----              | -                  |      |
| Sus_scrofa                  | -----             | -----             | -----             | -----             | -----             | -----             | -----              | -                  |      |
| Choloepus_hoffmanni         | -----             | -----             | -----             | -----             | -----             | -----             | -----              | -                  |      |
| Vicugna_pacos               | -----             | -----             | -----             | -----             | -----             | -----             | -----              | -                  |      |
| Gavialis_gangeticus         | -----             | -----             | -----             | -----             | -----             | -----             | -----              | -                  |      |
| Mammalia                    | -----             | -----             | -----             | -----             | -----             | -----             | -----              | -                  |      |
| Passeroidea                 | -----             | -----             | -----             | -----             | -----             | -----             | -----              | -                  |      |
| Takifugu                    | -----             | -----             | -----             | -----             | -----             | -----             | -----              | -                  |      |
| Pteropus_vampyrus           | -----             | -----             | -----             | -----             | -----             | -----             | -----              | -                  |      |
| Ornithorhynchus             | <b>TTACCTCCCC</b> | <b>TGAACTTTGC</b> | <b>CCGCTTTGGG</b> | <b>TCCGGCTCCT</b> | <b>GCTGCCTCGC</b> | <b>CAATTTCACT</b> | <b>GAGCGGTGGT</b>  | 117                |      |
| Oryctolagus_cuniculus       | -----             | -----             | -----             | -----             | -----             | -----             | -----              | -                  |      |
| Gallus_gallus               | -----             | -----             | -----             | -----             | -----             | -----             | -----              | -                  |      |
| Hominidae                   | <b>GCTCTTCGGA</b> | <b>AGGGACTTGC</b> | <b>TGTCTAAGTT</b> | <b>AGGGGCTCC</b>  | <b>ATTCGGTTGC</b> | <b>GCCCCAGCCT</b> | <b>CCCCCTCCAGT</b> | 2285               |      |
| Metatheria                  | -----             | -----             | -----             | -----             | -----             | -----             | -----              | -                  |      |
| Rodentia                    | -----             | -----             | -----             | -----             | -----             | -----             | -----              | -                  |      |
| Monodelphis                 | -----             | -----             | -----             | -----             | -----             | -----             | -----              | -                  |      |
| Consensus                   | -----             | -----             | -----             | -----             | -----             | -----             | -----              | -                  |      |
| Conservation                | 100%              | -----             |                   |                   |                   |                   |                    | 0%                 |      |

|                             | 6,040       |                     | 6,060      |            | 6,080      |            |            |      |
|-----------------------------|-------------|---------------------|------------|------------|------------|------------|------------|------|
| Dipodomys_ordii             | ----        | ----                | ----       | ----       | ----       | -          |            |      |
| Laurasiatheria              | ----        | ----                | ----       | ----       | ----       | -          |            |      |
| Eutheria                    | ----        | ----                | ----       | ----       | ----       | -          |            |      |
| Tarsius_syrichtha           | ----        | ----                | ----       | ----       | ----       | -          |            |      |
| Muridae                     | TGTGGNGGCC  | ACGCGTGGTT          | GTCTGTTCTG | TGTCTCTCTA | TGTGCATGTG | TGTCTCTGTG | TGTCTTTCTA | 428  |
| Gasterosteus_aculeatus      | GAATAATCGAT | TTGTGAAGGC          | TGACAAGACG | GCCCCTTGCG | GGAACNNTAC | TGGTAAAATA | TGTTATANCA | 85   |
| Felis_silvestris            | ----        | ----                | ----       | ----       | ----       | ----       | ----       | -    |
| Rattus                      | ----        | ----                | ----       | ----       | ----       | ----       | ----       | -    |
| Papio_hamadryas             | TGGGTTCTGT  | CGCTTGTGGA          | TACCCGGTTT | TGCTGAATTG | GCCGCCCCCC | TTTACGCACT | CACCAAGGAA | 3387 |
| Pan_troglodytes             | GGGATTAATT  | CATCCTCGAC          | TGACATAATG | GGTCTTACCC | ACTTCCGAAA | CCCCACTCCT | TAGGTGGTAG | 1467 |
| Ailuropoda_melanoleuca      | ----        | ----                | ----       | ----       | ----       | ----       | ----       | -    |
| Cavia_porcellus             | ----        | ----                | ----       | ----       | ----       | ----       | ----       | -    |
| Ictidomys_tridecemlineatus  | ----        | ----                | ----       | ----       | ----       | ----       | ----       | -    |
| Canis                       | ----        | ----                | ----       | ----       | ----       | ----       | ----       | -    |
| Felis_catus                 | ----        | ----                | ----       | ----       | ----       | ----       | ----       | -    |
| Ochotona_princeps           | ----        | ----                | ----       | ----       | ----       | ----       | ----       | -    |
| Cercopithecidae             | ----        | ----                | ----       | ----       | ----       | ----       | ----       | -    |
| Carnivora                   | ----        | ----                | ----       | ----       | ----       | ----       | ----       | -    |
| Mus                         | ----        | ----                | ----       | ----       | ----       | ----       | ----       | -    |
| Mus_musculus                | ----        | ----                | ----       | ----       | ----       | ----       | ----       | -    |
| Rattus_norvegicus           | ----        | ----                | ----       | ----       | ----       | ----       | ----       | -    |
| Tursiops_truncatus          | ----        | ----                | ----       | ----       | ----       | ----       | ----       | -    |
| Procapra_capensis           | ----        | ----                | ----       | ----       | ----       | ----       | ----       | -    |
| Primates                    | ----        | ----                | ----       | ----       | ----       | ----       | ----       | -    |
| Echinops_telfairi           | ----        | ----                | ----       | ----       | ----       | ----       | ----       | -    |
| Sorex_araneus               | ----        | ----                | ----       | ----       | ----       | ----       | ----       | -    |
| Canidae                     | ----        | ----                | ----       | ----       | ----       | ----       | ----       | -    |
| Otomur_garnettii            | ----        | ----                | ----       | ----       | ----       | ----       | ----       | -    |
| Gallus                      | ----        | ----                | ----       | ----       | ----       | ----       | ----       | -    |
| Callithrix_jacchus          | ----        | ----                | ----       | ----       | ----       | ----       | ----       | -    |
| Crocodylus_porosus          | ----        | ----                | ----       | ----       | ----       | ----       | ----       | -    |
| Erinaceus_europaeus         | ----        | ----                | ----       | ----       | ----       | ----       | ----       | -    |
| rnd-6_family-7426-LTR-ERV1  | ----        | ----                | ----       | ----       | ----       | ----       | ----       | -    |
| Esox_lucius                 | ----        | ----                | ----       | ----       | ----       | ----       | ----       | -    |
| Salmo_salar                 | ----        | ----                | ----       | ----       | ----       | ----       | ----       | -    |
| Didelphidae                 | ----        | ----                | ----       | ----       | ----       | ----       | ----       | -    |
| Latimeria_chalumnae         | ----        | ----                | ----       | ----       | ----       | ----       | ----       | -    |
| Monodelphis_domestica       | ----        | ----                | ----       | ----       | ----       | ----       | ----       | -    |
| Macropus_eugenii            | ----        | ----                | ----       | ----       | ----       | ----       | ----       | -    |
| Alligator_mississippiensis  | ----        | ----                | ----       | ----       | ----       | ----       | ----       | -    |
| Chrysemys_picta_belli       | GGAAAACGTC  | CGTTCCGTCT          | GGGCCTTCAT | TTCCCTTCC  | TCTCTGGGAC | GGGACTGTTG | TTTAGGACCT | 876  |
| Danio_rerio                 | ----        | ----                | ----       | ----       | ----       | ----       | ----       | -    |
| Taeniopygia                 | ----        | ----                | ----       | ----       | ----       | ----       | ----       | -    |
| Dasyus_novemcinctus         | ----        | ----                | ----       | ----       | ----       | ----       | ----       | -    |
| LTR_XT                      | ----        | ----                | ----       | ----       | ----       | ----       | ----       | -    |
| Haplorrhini                 | AGAAGTACAA  | GGGTGGGTAA          | GAGAAAGAAT | ACCTGTTAGC | CTTACAGATG | CAAT-----  | ACATCCCTTT | 6011 |
| Catarrhini                  | AACAATCTCA  | ACTTGGGTAA          | ATGAGAGGTG | TCCCATCAGC | TTATTCTCCC | CAGT-----  | TCACCTTTC  | 5486 |
| Anolis_carolinensis         | ----        | ----                | ----       | ----       | ----       | ----       | ----       | 1184 |
| Murine_leukemia_virus       | AGAGGTCTGG  | AAGCCGCTGG          | CCGCTGCTTA | TCAGGACCAG | CTGGATCAGC | CAGTGATACC | ACACCCCTTC | 5470 |
| Phascolarctos_cinereus      | TCAGATCTGG  | GACCAGATAA          | AAGAAGCCTA | C--AGGCCTG | GTAAGTGGCC | CATT-----  | CCACCCGTTT | 5273 |
| Estrildidae                 | ----        | ----                | ----       | ----       | ----       | ----       | ----       | -    |
| Xenopus_Silurana_tropicalis | ----        | ----                | ----       | ----       | ----       | ----       | ----       | -    |
| IXT                         | TGGANGCANN  | ANCTTCAACC          | AGGANTTNG  | TGNTGATAAA | GAGATTNGTG | NNGCAAGAGC | ATAGNTTAGA | 5568 |
| Takifugu_rubripes           | ----        | ----                | ----       | ----       | ----       | ----       | ----       | -    |
| Bos_taurus                  | ----        | ----                | ----       | ----       | ----       | ----       | ----       | -    |
| Homo_sapiens                | ----        | ----                | ----       | ----       | ----       | ----       | ----       | -    |
| Microcebus_murinus          | ----        | ----                | ----       | ----       | ----       | ----       | ----       | -    |
| Myotis_lucifugus            | ----        | ----                | ----       | ----       | ----       | ----       | ----       | -    |
| Equus_caballus              | ----        | ----                | ----       | ----       | ----       | ----       | ----       | -    |
| Tupaia_belangeri            | ----        | ----                | ----       | ----       | ----       | ----       | ----       | -    |
| Loxodonta_africana          | ----        | ----                | ----       | ----       | ----       | ----       | ----       | -    |
| Murinae                     | ----        | ----                | ----       | ----       | ----       | ----       | ----       | -    |
| Canis_lupus_familiaris      | ----        | ----                | ----       | ----       | ----       | ----       | ----       | -    |
| Sus_scrofa                  | ----        | ----                | ----       | ----       | ----       | ----       | ----       | -    |
| Choloepus_hoffmanni         | ----        | ----                | ----       | ----       | ----       | ----       | ----       | -    |
| Vicugna_pacos               | ----        | ----                | ----       | ----       | ----       | ----       | ----       | -    |
| Gavialis_gangeticus         | ----        | ----                | ----       | ----       | ----       | ----       | ----       | -    |
| Mammalia                    | ----        | ----                | ----       | ----       | ----       | ----       | ----       | -    |
| Passeroidea                 | ----        | ----                | ----       | ----       | ----       | ----       | ----       | -    |
| Takifugu                    | ----        | ----                | ----       | ----       | ----       | ----       | ----       | -    |
| Pteropus_vampyrus           | ----        | ----                | ----       | ----       | ----       | ----       | ----       | -    |
| Ornithorhynchus             | GTTGTCTCG   | TTGAGAGTTT          | CGTTCGAGAA | GAGGTTGAGA | GGGATACCTG | GCGTTGGCC  | CCCCGCGCCA | 187  |
| Oryctolagus_cuniculus       | ----        | ----                | ----       | ----       | ----       | ----       | ----       | -    |
| Gallus_gallus               | ----        | ----                | ----       | ----       | ----       | ----       | ----       | -    |
| Hominidae                   | GCAATCTCTT  | TGCTTCCTCT          | GCTGGCACTT | AGCGATGACA | CTCCTTCGCC | GATCCCATCG | CTCCTGTGC  | 2355 |
| Metatheria                  | ----        | ----                | ----       | ----       | ----       | ----       | ----       | -    |
| Rodentia                    | ----        | ----                | ----       | ----       | ----       | ----       | ----       | -    |
| Monodelphis                 | ----        | ----                | ----       | ----       | ----       | ----       | ----       | -    |
| Consensus                   | ----        | ----                | ----       | ----       | ----       | ----       | ----       | -    |
| Conservation                | 100%        | [Conservation plot] |            |            |            |            | 0%         |      |

|                             | 6,100      | 6,120       | 6,140      | 6,160       |            |            |            |      |
|-----------------------------|------------|-------------|------------|-------------|------------|------------|------------|------|
| Dipodomys_ordii             | -----      | -----       | -----      | -----       | -          |            |            |      |
| Laurasiatheria              | -----      | -----       | -----      | -----       | -          |            |            |      |
| Eutheria                    | -----      | -----       | -----      | -----       | -          |            |            |      |
| Tarsius_syrichta            | -----      | -----       | -----      | -----       | -          |            |            |      |
| Muridae                     | TGTGTTTCTG | TCANTTTTGT  | TTCCCTGTAT | TGACCAAGTGG | CTTTCTCTGG | TGTGAGAATC | CCCTAGCCTT | 498  |
| Gasterosteus_aculeatus      | TTNTNTGGTG | CNAAACCCGT  | GTCTCNAGTG | TCCTGTANTN  | CCCTGGTGCA | AAGAGCANCA | TGATACAAAA | 155  |
| Felis_silvestris            | -----      | -----       | -----      | -----       | -----      | -----      | -----      | -    |
| Rattus                      | -----      | -----       | -----      | -----       | -----      | -----      | -----      | -    |
| Papio_hamadryas             | AGCACCCCTT | TCACCTGGCA  | GACAGAGCAT | CAATTGGCTT  | TTGAGGCACT | AAAAAAGGCA | CTCTTGTCTG | 3457 |
| Pan_troglodytes             | AAAAGCCAG  | GACTGTTGAT  | TACGCTTTAT | GGCAGAGAAC  | CAGGGCCTTC | AATAAAAGC  | --CTACTCTC | 1534 |
| Ailuropoda_melanoleuca      | -----      | -----       | -----      | -----       | -----      | -----      | -----      | -    |
| Cavia_porcellus             | -----      | -----       | -----      | -----       | -----      | -----      | -----      | -    |
| Ictidomys_tridecemlineatus  | -----      | -----       | -----      | -----       | -----      | -----      | -----      | -    |
| Canis                       | -----      | -----       | -----      | -----       | -----      | -----      | -----      | -    |
| Felis_catus                 | -----      | -----       | -----      | -----       | -----      | -----      | -----      | -    |
| Ochotona_princeps           | -----      | -----       | -----      | -----       | -----      | -----      | -----      | -    |
| Cercopithecidae             | -----      | -----       | -----      | -----       | -----      | -----      | -----      | -    |
| Carnivora                   | -----      | -----       | -----      | -----       | -----      | -----      | -----      | -    |
| Mus                         | -----      | -----       | -----      | -----       | -----      | -----      | -----      | -    |
| Mus_musculus                | -----      | -----       | -----      | -----       | -----      | -----      | -----      | -    |
| Rattus_norvegicus           | -----      | -----       | -----      | -----       | -----      | -----      | -----      | -    |
| Tursiops_truncatus          | -----      | -----       | -----      | -----       | -----      | -----      | -----      | -    |
| Procapra_capensis           | -----      | -----       | -----      | -----       | -----      | -----      | -----      | -    |
| Primates                    | -----      | -----       | -----      | -----       | -----      | -----      | -----      | -    |
| Echinops_telfairi           | -----      | -----       | -----      | -----       | -----      | -----      | -----      | -    |
| Sorex_araneus               | -----      | -----       | -----      | -----       | -----      | -----      | -----      | -    |
| Canidae                     | -----      | -----       | -----      | -----       | -----      | -----      | -----      | -    |
| Otolemur_garnettii          | -----      | -----       | -----      | -----       | -----      | -----      | -----      | -    |
| Gallus                      | -----      | -----       | -----      | -----       | -----      | -----      | -----      | -    |
| Callithrix_jacchus          | -----      | -----       | -----      | -----       | -----      | -----      | -----      | -    |
| Crocodylus_porosus          | -----      | -----       | -----      | -----       | -----      | -----      | -----      | -    |
| Erinaceus_europaeus         | -----      | -----       | -----      | -----       | -----      | -----      | -----      | -    |
| rnd-6_family-7426-LTR-ERV1  | -----      | -----       | -----      | -----       | -----      | -----      | -----      | -    |
| Esox_lucius                 | -----      | -----       | -----      | -----       | -----      | -----      | -----      | -    |
| Salmo_salar                 | -----      | -----       | -----      | -----       | -----      | -----      | -----      | -    |
| Didelphidae                 | -----      | -----       | -----      | -----       | -----      | -----      | -----      | -    |
| Latimeria_chalumnae         | -----      | -----       | -----      | -----       | -----      | -----      | -----      | -    |
| Monodelphis_domestica       | -----      | -----       | -----      | -----       | -----      | -----      | -----      | -    |
| Macropus_eugenii            | -----      | -----       | -----      | -----       | -----      | -----      | -----      | -    |
| Alligator_mississippiensis  | -----      | -----       | -----      | -----       | -----      | -----      | -----      | -    |
| Chrysemys_picta_bellii      | ATTCAACAGA | TGTAATTCCC  | CGAGAATCTA | TGCCTTCATT  | ACCCAGCACA | CCCCCATGGC | AGGTCTGGCA | 946  |
| Danio_rerio                 | -----      | -----       | -----      | -----       | -----      | -----      | -----      | -    |
| Taeniopygia                 | -----      | -----       | -----      | -----       | -----      | -----      | -----      | -    |
| Dasybus_novemcinctus        | -----      | -----       | -----      | -----       | -----      | -----      | -----      | -    |
| LTR_XT                      | -----      | -----       | -----      | -----       | -----      | -----      | -----      | -    |
| Haplorrhini                 | CAACCTGGGG | ACTCTGTATG  | GGTTAAACGC | TGGAATCCTA  | CCACCCTGGG | GCCCTTATGG | GATGGCCCCC | 6081 |
| Catarrhini                  | TCTCCAGGTG | ATCGCGTGTG  | GATCAAGGAC | TGGAACGTAG  | CCCTTTTGGC | GCCACGGTGG | AAAGGACCTC | 5556 |
| Anolis_carolinensis         | -----      | -----       | -----      | -----       | -----      | -----      | -----      | 1184 |
| Murine_leukemia_virus       | CGTGTCCGGT | ACGCCGTGTG  | GGTACGCCGG | CACCAGACTA  | AGAACTTAGA | ACCCCGCTGG | AAAGGACCTT | 5540 |
| Phascolarctos_cinereus      | CAGGTCCGGT | ACCGAGTGTG  | GGTTAGACGT | CATCCGTCGG  | GCAGCCTTGA | GCCTCGGTGG | AAAGGCCCAT | 5343 |
| Estrildidae                 | -----      | -----       | -----      | -----       | -----      | -----      | -----      | -    |
| Xenopus_Silurana_tropicalis | -----      | -----       | -----      | -----       | -----      | -----      | -----      | -    |
| L_XT                        | CGGACTNTAT | CANNTTTCNAG | TAAATACNGN | NNNNNNACCT  | ATANTCATAG | AAAGGCCATT | NNTTNACTGN | 5638 |
| Takifugu_rubripes           | -----      | -----       | -----      | -----       | -----      | -----      | -----      | -    |
| Bos_taurus                  | -----      | -----       | -----      | -----       | -----      | -----      | -----      | -    |
| Homo_sapiens                | -----      | -----       | -----      | -----       | -----      | -----      | -----      | -    |
| Microcebus_murinus          | -----      | -----       | -----      | -----       | -----      | -----      | -----      | -    |
| Myotis_lucifugus            | -----      | -----       | -----      | -----       | -----      | -----      | -----      | -    |
| Equus_caballus              | -----      | -----       | -----      | -----       | -----      | -----      | -----      | -    |
| Tupaia_belangeri            | -----      | -----       | -----      | -----       | -----      | -----      | -----      | -    |
| Loxodonta_africana          | -----      | -----       | -----      | -----       | -----      | -----      | -----      | -    |
| Murinae                     | -----      | -----       | -----      | -----       | -----      | -----      | -----      | -    |
| Canis_lupus_familiaris      | -----      | -----       | -----      | -----       | -----      | -----      | -----      | -    |
| Sus_scrofa                  | -----      | -----       | -----      | -----       | -----      | -----      | -----      | -    |
| Choloepus_hoffmanni         | -----      | -----       | -----      | -----       | -----      | -----      | -----      | -    |
| Vicugna_pacos               | -----      | -----       | -----      | -----       | -----      | -----      | -----      | -    |
| Gavialis_gangeticus         | -----      | -----       | -----      | -----       | -----      | -----      | -----      | -    |
| Mammalia                    | -----      | -----       | -----      | -----       | -----      | -----      | -----      | -    |
| Passeroidea                 | -----      | -----       | -----      | -----       | -----      | -----      | -----      | -    |
| Takifugu                    | -----      | -----       | -----      | -----       | -----      | -----      | -----      | -    |
| Pteropus_vampyrus           | -----      | -----       | -----      | -----       | -----      | -----      | -----      | -    |
| Ornithorhynchus             | GGCCCCTTGT | GGAAGGGGCT  | GCCACGGGGA | TGGTCTCTTT  | GTCTTTCTTC | TTGAGACCTC | ACCTGGGAAG | 257  |
| Oryctolagus_cuniculus       | -----      | -----       | -----      | -----       | -----      | -----      | -----      | -    |
| Gallus_gallus               | -----      | -----       | -----      | -----       | -----      | -----      | -----      | -    |
| Hominidae                   | CGTTTGATCC | AATAGTATGG  | GACATCTCAA | CCCCCTCCAT  | CGCCCCACAC | CATGCCCCAA | TAATGATCAA | 2425 |
| Metatheria                  | -----      | -----       | -----      | -----       | -----      | -----      | -----      | -    |
| Rodentia                    | -----      | -----       | CTCATNTTGC | TGCCGTGACT  | CGGATAGGCT | CTCCTGGTGC | CTGTGCTCCC | 50   |
| Monodelphis                 | -----      | -----       | -----      | -----       | -----      | -----      | -----      | -    |
| Consensus                   | -----      | -----       | -----      | -----       | -----      | -----      | -----      | -    |
| Conservation                | 100%       | -----       | -----      | -----       | -----      | -----      | -----      | 0%   |

|                             | 6,180      |            | 6,200      |            | 6,220      |            |             |      |  |
|-----------------------------|------------|------------|------------|------------|------------|------------|-------------|------|--|
| Dipodomys_ordii             | ----       | ----       | ----       | ----       | ----       | -          |             |      |  |
| Laurasiatheria              | ----       | ----       | ----       | ----       | ----       | -          |             |      |  |
| Eutheria                    | ----       | ----       | ----       | ----       | ----       | -          |             |      |  |
| Tarsius_syrichtha           | ----       | ----       | ----       | ----       | ----       | -          |             |      |  |
| Muridae                     | AAGACCTGTG | CCCCTCCTG  | TTGGGGACCT | GAAATCCTTT | TGNCTCTGCC | AGAGNAACCC | AGAAAAACCTC | 568  |  |
| Gasterosteus_aculeatus      | TGTTGCTNTG | CAGCCGTGTN | CTNAGAAGGG | AGGAGGTCNN | CTCNATTNAT | NGAAGNTTCA | AANCANNNGA  | 225  |  |
| Felis_silvestris            | ----       | ----       | ----       | ----       | ----       | ----       | ----        | -    |  |
| Rattus                      | ----       | ----       | ----       | ----       | ----       | ----       | ----        | -    |  |
| Papio_hamadryas             | CCCCAGCCCT | TGGGTTACCG | GACACCTCAA | AGCCCTTTAC | CCTCTTCCTG | GACGAAAGGC | AAGGGATTGC  | 3527 |  |
| Pan_troglodytes             | GCGCCGCACT | AGGACTACCT | GACNTTACCA | AGCCCTTCCA | CTTATACGTG | GATGAGAATA | AGGGNNTCGC  | 1604 |  |
| Ailuropoda_melanoleuca      | ----       | ----       | ----       | ----       | ----       | ----       | ----        | -    |  |
| Cavia_porcellus             | ----       | ----       | ----       | ----       | ----       | ----       | ----        | -    |  |
| Ictidomys_tridecemlineatus  | ----       | ----       | ----       | ----       | ----       | ----       | ----        | -    |  |
| Canis                       | ----       | ----       | ----       | ----       | ----       | ----       | ----        | -    |  |
| Felis_catus                 | ----       | ----       | ----       | ----       | ----       | ----       | ----        | -    |  |
| Ochotona_princeps           | ----       | ----       | ----       | ----       | ----       | ----       | ----        | -    |  |
| Cercopithecidae             | ----       | ----       | ----       | ----       | ----       | ----       | ----        | -    |  |
| Carnivora                   | ----       | ----       | ----       | ----       | ----       | ----       | ----        | -    |  |
| Mus                         | ----       | ----       | ----       | ----       | ----       | ----       | ----        | -    |  |
| Mus_musculus                | ----       | ----       | ----       | ----       | ----       | ----       | ----        | -    |  |
| Rattus_norvegicus           | ----       | ----       | ----       | ----       | ----       | ----       | ----        | -    |  |
| Tursiops_truncatus          | ----       | ----       | ----       | ----       | ----       | ----       | ----        | -    |  |
| Procapra_capensis           | ----       | ----       | ----       | ----       | ----       | ----       | ----        | -    |  |
| Primates                    | ----       | ----       | ----       | ----       | ----       | ----       | ----        | -    |  |
| Echinops_telfairi           | ----       | ----       | ----       | ----       | ----       | ----       | ----        | -    |  |
| Sorex_araneus               | ----       | ----       | ----       | ----       | ----       | ----       | ----        | -    |  |
| Canidae                     | ----       | ----       | ----       | ----       | ----       | ----       | ----        | -    |  |
| Otomomys_garnettii          | ----       | ----       | ----       | ----       | ----       | ----       | ----        | -    |  |
| Gallus                      | ----       | ----       | ----       | ----       | ----       | ----       | ----        | -    |  |
| Callithrix_jacchus          | ----       | ----       | ----       | ----       | ----       | ----       | ----        | -    |  |
| Crocodylus_porosus          | ----       | ----       | ----       | ----       | ----       | ----       | ----        | -    |  |
| Erinaceus_europaeus         | ----       | ----       | ----       | ----       | ----       | ----       | ----        | -    |  |
| rnd-6_family-7426-LTR-ERV1  | ----       | ----       | ----       | ----       | ----       | ----       | ----        | -    |  |
| Esox_lucius                 | ----       | ----       | ----       | ----       | ----       | ----       | ----        | -    |  |
| Salmo_salar                 | ----       | ----       | ----       | ----       | ----       | ----       | ----        | -    |  |
| Didelphidae                 | ----       | ----       | ----       | ----       | ----       | ----       | ----        | -    |  |
| Latimeria_chalumnae         | ----       | ----       | ----       | ----       | ----       | ----       | ----        | -    |  |
| Monodelphis_domestica       | ----       | ----       | ----       | ----       | ----       | ----       | ----        | -    |  |
| Macropus_eugenii            | ----       | ----       | ----       | ----       | ----       | ----       | ----        | -    |  |
| Alligator_mississippiensis  | ----       | ----       | ----       | ----       | ----       | ----       | ----        | -    |  |
| Chrysemys_picta_bellii      | CGCCCAAAGC | CATCAAACCC | GTTATTTCAA | ACGCGTCATA | CCTAAGAAGC | GGGATGATGA | TTCTAAGAGG  | 1016 |  |
| Danio_rerio                 | ----       | ----       | ----       | ----       | ----       | ----       | ----        | -    |  |
| Taeniopygia                 | ----       | ----       | ----       | ----       | ----       | ----       | ----        | -    |  |
| Dasybus_novemcinctus        | ----       | ----       | ----       | ----       | ----       | ----       | ----        | -    |  |
| LTR_XT                      | ----       | ----       | ----       | ----       | ----       | ----       | ----        | -    |  |
| Haplorrhini                 | ATATTGTGAT | CATGTCTACC | CCTACCGCTG | TAAAGTTGTC | AGGTATTACA | CCTTGGATCC | ATCACAGCCG  | 6151 |  |
| Catarrhini                  | AGACCGTCAT | CCTGACCACC | CCCACGGCTG | TAAAGGTAGA | AGGAATCCCA | GCCTGGATCC | ACCACAGCCG  | 5626 |  |
| Anolis_carolinensis         | ----       | ----       | ----       | ----       | ----       | ----       | ----        | -    |  |
| Murine_leukemia_virus       | ACACCGTCCT | GCTGACCACC | CCCACCGCTC | TCAAAGTAGA | CGGCATCTCT | GGGTGGATAC | ACGCCGCTCA  | 5610 |  |
| Phascolarctos_cinereus      | ACCTGGTGCT | ACTGACCACC | CCGACCGCGG | TGAAGGTTGA | CGGTATTGCT | GCCTGGGTCC | ATGCTTCTCA  | 5413 |  |
| Estrildidae                 | ----       | ----       | ----       | ----       | ----       | ----       | ----        | -    |  |
| Xenopus_Silurana_tropicalis | ----       | ----       | ----       | ----       | ----       | ----       | ----        | -    |  |
| IXT                         | NATAAGGTAT | TTCCNGAAAC | AATATGGCCG | AAANCCTNAN | AAGAGCANNA | ATTCCAGTGA | CAGANNCTGA  | 5708 |  |
| Takifugu_rubripes           | ----       | ----       | ----       | ----       | ----       | ----       | ----        | -    |  |
| Bos_taurus                  | ----       | ----       | ----       | ----       | ----       | ----       | ----        | -    |  |
| Homo_sapiens                | ----       | ----       | ----       | ----       | ----       | ----       | ----        | -    |  |
| Microcebus_murinus          | ----       | ----       | ----       | ----       | ----       | ----       | ----        | -    |  |
| Myotis_lucifugus            | ----       | ----       | ----       | ----       | ----       | ----       | ----        | -    |  |
| Equus_caballus              | ----       | ----       | ----       | ----       | ----       | ----       | ----        | -    |  |
| Tupaia_belangeri            | ----       | ----       | ----       | ----       | ----       | ----       | ----        | -    |  |
| Loxodonta_africana          | ----       | ----       | ----       | ----       | ----       | ----       | ----        | -    |  |
| Murinae                     | ----       | ----       | ----       | ----       | ----       | ----       | ----        | -    |  |
| Canis_lupus_familiaris      | ----       | ----       | ----       | ----       | ----       | ----       | ----        | -    |  |
| Sus_scrofa                  | ----       | ----       | ----       | ----       | ----       | ----       | ----        | -    |  |
| Choloepus_hoffmanni         | ----       | ----       | ----       | ----       | ----       | ----       | ----        | -    |  |
| Vicugna_pacos               | ----       | ----       | ----       | ----       | ----       | ----       | ----        | -    |  |
| Gavialis_gangeticus         | ----       | ----       | ----       | ----       | ----       | ----       | ----        | -    |  |
| Mammalia                    | ----       | ----       | ----       | ----       | ----       | ----       | ----        | -    |  |
| Passeroidea                 | ----       | ----       | ----       | ----       | ----       | ----       | ----        | -    |  |
| Takifugu                    | ----       | ----       | ----       | ----       | ----       | ----       | ----        | -    |  |
| Pteropus_vampyrus           | ----       | ----       | ----       | ----       | ----       | ----       | ----        | -    |  |
| Ornithorhynchus             | GGACCGAGAG | GGAGACCATT | CCTTTTTTCT | TACTTTAACC | CCTGATGTGG | ATTATGGCAA | GGCTCTTGTC  | 327  |  |
| Oryctolagus_cuniculus       | ----       | ----       | ----       | ----       | ----       | ----       | ----        | -    |  |
| Gallus_gallus               | ----       | ----       | ----       | ----       | ----       | ----       | ----        | -    |  |
| Hominidae                   | ACTCAAGGAC | CCTACCAAAT | TTCCCTCGCG | GCCACAATTC | CCCATCTCAG | TTGAACACCG | CCAAGGGTTA  | 2495 |  |
| Metatheria                  | ----       | ----       | ----       | ----       | ----       | ----       | ----        | -    |  |
| Rodentia                    | CCTTGGGGTC | TGAGCCGCAC | TAGGACCCTA | TCCCTCATCT | CCAGTCNACC | TGCAACAGAC | TCAC--CTTC  | 118  |  |
| Monodelphis                 | ----       | ----       | ----       | ----       | ----       | ----       | ----        | -    |  |
| Consensus                   | ----       | ----       | ----       | ----       | ----       | ----       | ----        | -    |  |
| Conservation                | 100%<br>0% |            |            |            |            |            |             |      |  |

|                             | 6,240      | 6,260      | 6,280      | 6,300      |             |            |             |      |
|-----------------------------|------------|------------|------------|------------|-------------|------------|-------------|------|
| Dipodomys_ordii             | -----      | -----      | -----      | -----      | -           |            |             |      |
| Laurasiatheria              | -----      | -----      | -----      | -----      | -           |            |             |      |
| Eutheria                    | -----      | -----      | -----      | -----      | -           |            |             |      |
| Tarsius_syrichta            | -----      | -----      | -----      | -----      | -           |            |             |      |
| Muridae                     | CACCTGTCCC | ACTCTGGGAG | CAGGAGCGCT | TGCTTGTTTT | GTTGCTTGAC  | TCCTGCTCAC | GGTCAGGGTT  | 638  |
| Gasterosteus_aculeatus      | CTTCTGTNCA | TGCCCGCGGG | ATATNTTATT | NNGTANGNAA | GNTCNGGATN  | NAAGTGTCA  | NTTATGGCA   | 295  |
| Felis_silvestris            | -----      | -----      | -----      | -----      | -----       | -----      | -----       | -    |
| Rattus                      | -----      | -----      | -----      | -----      | -----       | -----      | -----       | -    |
| Papio_hamadryas             | CAAAGGAGTC | CTGACCCAAA | AATTGGGGCC | TTGGAAAAGA | CCGGTAGCAT  | ACCTGTCCAA | GAAGCTGGAC  | 3597 |
| Pan_troglodytes             | CAAGGCGGTA | ATAACTCAA  | ANTTAGNCC  | CTGGANGAGN | CCAGTTGCT   | ACCTGTCAA  | GAAACTNGAC  | 1674 |
| Ailuropoda_melanoleuca      | -----      | -----      | -----      | -----      | -----       | -----      | -----       | -    |
| Cavia_porcellus             | -----      | -----      | -----      | -----      | -----       | -----      | -----       | -    |
| Ictidomys_tridecemlineatus  | -----      | -----      | -----      | -----      | -----       | -----      | -----       | -    |
| Canis                       | -----      | -----      | -----      | -----      | -----       | -----      | -----       | -    |
| Felis_catus                 | -----      | -----      | -----      | -----      | -----       | -----      | -----       | -    |
| Ochotona_princeps           | -----      | -----      | -----      | -----      | -----       | -----      | -----       | -    |
| Cercopithecidae             | -----      | -----      | -----      | -----      | -----       | -----      | -----       | -    |
| Carnivora                   | -----      | -----      | -----      | -----      | -----       | -----      | -----       | -    |
| Mus                         | -----      | -----      | -----      | -----      | -----       | -----      | -----       | -    |
| Mus_musculus                | -----      | -----      | -----      | -----      | -----       | -----      | -----       | -    |
| Rattus_norvegicus           | -----      | -----      | -----      | -----      | -----       | -----      | -----       | -    |
| Tursiops_truncatus          | -----      | -----      | -----      | -----      | -----       | -----      | -----       | -    |
| Procapra_capensis           | -----      | -----      | -----      | -----      | -----       | -----      | -----       | -    |
| Primates                    | -----      | -----      | -----      | -----      | -----       | -----      | -----       | -    |
| Echinops_telfairi           | -----      | -----      | -----      | -----      | -----       | -----      | -----       | -    |
| Sorex_araneus               | -----      | -----      | -----      | -----      | -----       | -----      | -----       | -    |
| Canidae                     | -----      | -----      | -----      | -----      | -----       | -----      | -----       | -    |
| Otolemur_garnettii          | -----      | -----      | -----      | -----      | -----       | -----      | -----       | -    |
| Gallus                      | -----      | -----      | -----      | -----      | -----       | -----      | -----       | -    |
| Callithrix_jacchus          | -----      | -----      | -----      | -----      | -----       | -----      | -----       | -    |
| Crocodylus_porosus          | -----      | -----      | -----      | -----      | -----       | -----      | -----       | -    |
| Erinaceus_europaeus         | -----      | -----      | -----      | -----      | -----       | -----      | -----       | -    |
| rnd-6_family-7426-LTR-ERV1  | -----      | -----      | -----      | -----      | -----       | -----      | -----       | -    |
| Esox_lucius                 | -----      | -----      | -----      | -----      | -----       | -----      | -----       | -    |
| Salmo_salar                 | -----      | -----      | -----      | -----      | -----       | -----      | -----       | -    |
| Didelphidae                 | -----      | -----      | -----      | -----      | -----       | -----      | -----       | -    |
| Latimeria_chalumnae         | -----      | -----      | -----      | -----      | -----       | -----      | -----       | -    |
| Monodelphis_domestica       | -----      | -----      | -----      | -----      | -----       | -----      | -----       | -    |
| Macropus_eugenii            | -----      | -----      | -----      | -----      | -----       | -----      | -----       | -    |
| Alligator_mississippiensis  | -----      | -----      | -----      | -----      | -----       | -----      | -----       | -    |
| Chrysemys_picta_belli       | TTCGACCACT | CCTTGAACAC | CCATCTCCGT | ACAAAAGCCA | TGGACTATCG  | GTGTCAAGAC | TGGCTAATGG  | 1086 |
| Danio_rerio                 | -----      | -----      | -----      | -----      | -----       | -----      | -----       | -    |
| Taeniopygia                 | -----      | -----      | -----      | -----      | -----       | -----      | -----       | -    |
| Dasyus_novemcinctus         | -----      | -----      | -----      | -----      | -----       | -----      | -----       | -    |
| LTR_XT                      | -----      | -----      | -----      | -----      | -----       | -----      | -----       | -    |
| Haplorrhini                 | ACTGAAACCT | GCAGCCTCAG | TTCAAGACCG | GTGGACGAGT | CAGCAAGATC  | CAGATCATCC | AACTCGACTG  | 6221 |
| Catarrhini                  | TGTGAAACCT | GCAGCC---G | CTGAAACCTG | GGAG-----  | ---GCAAAACC | GAGCCCGGAC | AAC-----    | 5678 |
| Anolis_carolinensis         | -----      | -----      | -----      | -----      | -----       | -----      | -----       | 1184 |
| Murine_leukemia_virus       | CGTAAAGGCG | GCGACAACCT | CTCCGGCCGG | AACAGC---- | ATGGAAGGTC  | CAGCGTTCTC | AAA-----    | 5669 |
| Phascolarctos_cinereus      | TCTCAAACCC | GCGCCACCTG | GGGCACCCGA | TGAGTC---- | CTGGGAAGTC  | GAAAAGACTG | ATC-----    | 5472 |
| Estrildidae                 | -----      | -----      | -----      | -----      | -----       | -----      | -----       | -    |
| Xenopus_Silurana_tropicalis | -----      | -----      | -----      | -----      | -----       | -----      | -----       | -    |
| IXT                         | ANNTGTCNTA | CACNCTTAAA | CTTACCATCA | AANTCAANAA | TATTNATATC  | AACANAAAGA | TAACCTAAGGA | 5778 |
| Takifugu_rubripes           | -----      | -----      | -----      | -----      | -----       | -----      | -----       | -    |
| Bos_taurus                  | -----      | -----      | -----      | -----      | -----       | -----      | -----       | -    |
| Homo_sapiens                | -----      | -----      | -----      | -----      | -----       | -----      | -----       | -    |
| Microcebus_murinus          | -----      | -----      | -----      | -----      | -----       | -----      | -----       | -    |
| Myotis_lucifugus            | -----      | -----      | -----      | -----      | -----       | -----      | -----       | -    |
| Equus_caballus              | -----      | -----      | -----      | -----      | -----       | -----      | -----       | -    |
| Tupaia_belangeri            | -----      | -----      | -----      | -----      | -----       | -----      | -----       | -    |
| Loxodonta_africana          | -----      | -----      | -----      | -----      | -----       | -----      | -----       | -    |
| Murinae                     | -----      | -----      | -----      | -----      | -----       | -----      | -----       | -    |
| Canis_lupus_familiaris      | -----      | -----      | -----      | -----      | -----       | -----      | -----       | -    |
| Sus_scrofa                  | -----      | -----      | -----      | -----      | -----       | -----      | -----       | -    |
| Choloepus_hoffmanni         | -----      | -----      | -----      | -----      | -----       | -----      | -----       | -    |
| Vicugna_pacos               | -----      | -----      | -----      | -----      | -----       | -----      | -----       | -    |
| Gavialis_gangeticus         | -----      | -----      | -----      | -----      | -----       | -----      | -----       | -    |
| Mammalia                    | -----      | -----      | -----      | -----      | -----       | -----      | -----       | -    |
| Passeroidea                 | -----      | -----      | -----      | -----      | -----       | -----      | -----       | -    |
| Takifugu                    | -----      | -----      | -----      | -----      | -----       | -----      | -----       | -    |
| Pteropus_vampyrus           | -----      | -----      | -----      | -----      | -----       | -----      | -----       | -    |
| Ornithorhynchus             | CCTCCACCCC | AATTTTTTTA | AGACCCTGAG | GTATTAATTA | ATGTAATAAT  | TGGAAAATCC | CGCAGGAGAT  | 397  |
| Oryctolagus_cuniculus       | -----      | -----      | -----      | -----      | -----       | -----      | -----       | -    |
| Gallus_gallus               | -----      | -----      | -----      | -----      | -----       | -----      | -----       | -    |
| Hominidae                   | AAACCTATCA | TCACCAGGCT | CTTGCAACAA | CACATCCTTA | TCCCGGTAAA  | CTCCGTTGTC | AACACGCCCA  | 2565 |
| Metatheria                  | -----      | -----      | -----      | -----      | -----       | -----      | -----       | -    |
| Rodentia                    | CGGCTCACCG | ATCGCTTGGC | ACCCATCCA  | C-CAGCGGCA | ATTAGGTAAG  | CTTCCCCTTT | TGGTCGGTGT  | 187  |
| Monodelphis                 | -----      | -----      | -----      | -----      | -----       | -----      | -----       | -    |
| Consensus                   | -----      | -----      | -----      | -----      | -----       | -----      | -----       | -    |
| Conservation                |            |            |            |            |             |            |             |      |

|                             | 6,320      |            | 6,340      |             | 6,360      |                            |
|-----------------------------|------------|------------|------------|-------------|------------|----------------------------|
| Dipodomys_ordii             | -----      | -----      | -----      | -----       | -----      | -                          |
| Laurasiatheria              | -----      | -----      | -----      | -----       | -----      | -                          |
| Eutheria                    | -----      | -----      | -----      | -----       | -----      | -                          |
| Tarsius_syrichta            | -----      | -----      | -----      | -----       | -----      | -                          |
| Muridae                     | GGTCCCTGTG | TGGAGGTGGG | GAGGGGCTGG | GCCTCTCATC  | AAGGCCCCCT | GCCATCTAAG CGGAATGCAC 708  |
| Gasterosteus_aculeatus      | ATNAATNAGA | TTNNCAGCGG | CCACTGAGGA | NGATGATGTG  | TGTGNNNGCT | GCCACNGATN CACCGGGTTC 365  |
| Felis_silvestris            | -----      | -----      | -----      | -----       | -----      | -                          |
| Rattus                      | -----      | -----      | -----      | -----       | -----      | -                          |
| Papio_hamadryas             | CCTGTGGCGG | CCGGCTGGCC | CCCATGTCTT | CGTATCATGG  | CAGCCACCGC | TATGCTGGTC AAAGACTCTG 3667 |
| Pan_troglodytes             | CCAGTAGCTG | CCGGGTGGCC | CCCTTGCTCT | CG-ATGATTG  | CGGCCACGGC | TATGNTNGTC AAAGACACTG 1743 |
| Ailuropoda_melanoleuca      | -----      | -----      | -----      | -----       | -----      | -                          |
| Cavia_porcellus             | -----      | -----      | -----      | -----       | -----      | -                          |
| Ictidomys_tridecemlineatus  | -----      | -----      | -----      | -----       | -----      | -                          |
| Canis                       | -----      | -----      | -----      | -----       | -----      | -                          |
| Felis_catus                 | -----      | -----      | -----      | -----       | -----      | -                          |
| Ochotona_princeps           | -----      | -----      | -----      | -----       | -----      | -                          |
| Cercopithecidae             | -----      | -----      | -----      | -----       | -----      | -                          |
| Carnivora                   | -----      | -----      | -----      | -----       | -----      | -                          |
| Mus                         | -----      | -----      | -----      | -----       | -----      | -                          |
| Mus_musculus                | -----      | -----      | -----      | -----       | -----      | -                          |
| Rattus_norvegicus           | -----      | -----      | -----      | -----       | -----      | -                          |
| Tursiops_truncatus          | -----      | -----      | -----      | -----       | -----      | -                          |
| Procavia_capensis           | -----      | -----      | -----      | -----       | -----      | -                          |
| Primates                    | -----      | -----      | -----      | -----       | -----      | -                          |
| Echinops_telfairi           | -----      | -----      | -----      | -----       | -----      | -                          |
| Sorex_araneus               | -----      | -----      | -----      | -----       | -----      | -                          |
| Canidae                     | -----      | -----      | -----      | -----       | -----      | -                          |
| Otolemur_garnettii          | -----      | -----      | -----      | -----       | -----      | -                          |
| Gallus                      | -----      | -----      | -----      | -----       | -----      | -                          |
| Callithrix_jacchus          | -----      | -----      | -----      | -----       | -----      | -                          |
| Crocodylus_porosus          | -----      | -----      | -----      | -----       | -----      | -                          |
| Erinaceus_europaeus         | -----      | -----      | -----      | -----       | -----      | -                          |
| rnd-6_family-7426-LTR-ERV1  | -----      | -----      | -----      | -----       | -----      | -                          |
| Esox_lucius                 | -----      | -----      | -----      | -----       | -----      | -                          |
| Salmo_salar                 | -----      | -----      | -----      | -----       | -----      | -                          |
| Didelphidae                 | -----      | -----      | -----      | -----       | -----      | -                          |
| Latimeria_chalumnae         | -----      | -----      | -----      | -----       | -----      | -                          |
| Monodelphis_domestica       | -----      | -----      | -----      | -----       | -----      | -                          |
| Macropus_eugenii            | -----      | -----      | -----      | -----       | -----      | -                          |
| Alligator_mississippiensis  | -----      | -----      | -----      | -----       | -----      | -                          |
| Chrysemys_picta_belli       | TTAGTCTCCT | TCCAAACCTA | CATTGGCTCT | ATACCATTTC  | GTTGATTTCG | TTTCTTCATC CGTACCATCC 1156 |
| Danio_rerio                 | -----      | -----      | -----      | -----       | -----      | -                          |
| Taeniopygia                 | -----      | -----      | -----      | -----       | -----      | -                          |
| Dasybus_novemcinctus        | -----      | -----      | -----      | -----       | -----      | -                          |
| LTR_XT                      | -----      | -----      | -----      | -----       | -----      | -                          |
| Haplorrhini                 | ATCTTGCAGA | GGAACCAAGG | CGCAGCAGAA | AAAGACGACT  | GCCCTGCTCC | GACCACACCG GAGGCTGGTC 6291 |
| Catarrhini                  | -CCCTGCAAA | GTGACT     | -----CTGAG | GAGGACGAC-  | -----      | -----5707                  |
| Anolis_carolinensis         | -----      | -----      | -----      | -----       | -----      | -----1184                  |
| Murine_leukemia_virus       | ACCCCTTAAA | GATAAG-ATT | AACCCGTG-  | GGGCCCCCTG  | AT-        | -----5708                  |
| Phascolarctos_cinereus      | ATCCTCTTAA | GTTGCGTGTT | CGGCGGCGCC | GAAAATGAATC | AA-        | -----5514                  |
| Estrildidae                 | -----      | -----      | -----      | -----       | -----      | -----                      |
| Xenopus_Silurana_tropicalis | -----      | -----      | -----      | -----       | -----      | -----                      |
| L_XT                        | NGCATTACCN | NTGNNTCNGA | AATCAGGATN | ANAAAAANAN  | ATCATTAAGT | AAGTTAGACN AGAGTAGTAA 5848 |
| Takifugu_rubripes           | -----      | -----      | -----      | -----       | -----      | -----                      |
| Bos_taurus                  | -----      | -----      | -----      | -----       | -----      | -----                      |
| Homo_sapiens                | -----      | -----      | -----      | -----       | -----      | -----                      |
| Microcebus_murinus          | -----      | -----      | -----      | -----       | -----      | -----                      |
| Myotis_lucifugus            | -----      | -----      | -----      | -----       | -----      | -----                      |
| Equus_caballus              | -----      | -----      | -----      | -----       | -----      | -----                      |
| Tupaia_belangeri            | -----      | -----      | -----      | -----       | -----      | -----                      |
| Loxodonta_africana          | -----      | -----      | -----      | -----       | -----      | -----                      |
| Murinae                     | -----      | -----      | -----      | -----       | -----      | -----                      |
| Canis_lupus_familiaris      | -----      | -----      | -----      | -----       | -----      | -----                      |
| Sus_scrofa                  | -----      | -----      | -----      | -----       | -----      | -----                      |
| Choloepus_hoffmanni         | -----      | -----      | -----      | -----       | -----      | -----                      |
| Vicugna_pacos               | -----      | -----      | -----      | -----       | -----      | -----                      |
| Gavialis_gangeticus         | -----      | -----      | -----      | -----       | -----      | -----                      |
| Mammalia                    | -----      | -----      | -----      | -----       | -----      | -----                      |
| Passeroidea                 | -----      | -----      | -----      | -----       | -----      | -----                      |
| Takifugu                    | -----      | -----      | -----      | -----       | -----      | -----                      |
| Pteropus_vampyrus           | -----      | -----      | -----      | -----       | -----      | -----                      |
| Ornithorhynchus             | AAAAGCCCTT | ATAAACTATT | TAGCAGAGAT | GAGGAAAAAT  | TTATAATATT | CCTTCGGAAG AAAATCCCGA 467  |
| Oryctolagus_cuniculus       | -----      | -----      | -----      | -----       | -----      | -----                      |
| Gallus_gallus               | -----      | -----      | -----      | -----       | -----      | -----                      |
| Hominidae                   | TTCTGCCCAT | CCGTAAGGCC | TCTGGCGCGT | ACCGTTTAGT  | GCAAGATCTT | CGCATCATCA ACGAGGCTNT 2635 |
| Metatheria                  | -----      | -----      | -----      | -----       | -----      | -----                      |
| Rodentia                    | AAATGCTTCC | CTGAGTCCGA | GGAAGTGACT | GTTGAGCGTC  | CGGCACCCCT | CTGGTACTCT TGGAGGTGGA 257  |
| Monodelphis                 | -----      | -----      | -----      | -----       | -----      | -----                      |
| Consensus                   | -----      | -----      | -----      | -----       | -----      | -----                      |
| Conservation                | 100%       | -----      | -----      | -----       | -----      | -----                      |
|                             | 0%         | -----      | -----      | -----       | -----      | -----                      |

|                             | 6,380       | 6,400       | 6,420      | 6,440      |              |             |            |            |      |
|-----------------------------|-------------|-------------|------------|------------|--------------|-------------|------------|------------|------|
| Dipodomys_ordii             | -----       | -----       | -----      | -----      | -            |             |            |            |      |
| Laurasiatheria              | -----       | -----       | -----      | -----      | -            |             |            |            |      |
| Eutheria                    | -----       | -----       | -----      | -----      | -            |             |            |            |      |
| Tarsius_syrichta            | -----       | -----       | -----      | -----      | -            |             |            |            |      |
| Muridae                     | ACAGGGAGGG  | GGAAATAGTT  | CCCCAGGTG  | AGCATTCTCC | TCTCCTCTGC   | GCCTGCTCTA  | AGCAGCCCA  | 778        |      |
| Gasterosteus_aculeatus      | NAATCTGANC  | ATGATTNGTA  | GCNACCGGAA | CTGGCAGGGA | GANTGTCCTT   | CACATGGTAN  | AAAAACTCAG | 435        |      |
| Felis_silvestris            | -----       | -----       | -----      | -----      | -----        | -----       | -----      | -          |      |
| Rattus                      | -----       | -----       | -----      | -----      | -----        | -----       | -----      | -          |      |
| Papio_hamadryas             | CTAAGTTAAC  | CCTTGGGCAG  | CCACTGACTG | TTATTACTCC | ACATACTCTA   | GAGGCCATAG  | TGCGGCAGCC | 3737       |      |
| Pan_troglodytes             | ATAAGCTTAN  | CNTNNGGCCAA | GAATTGCCGG | TCNTTACCCC | ACATGC - CTC | GAAGCTANAG  | TCANACAGCC | 1812       |      |
| Ailuropoda_melanoleuca      | -----       | -----       | -----      | -----      | -----        | -----       | -----      | -          |      |
| Cavia_porcellus             | -----       | -----       | -----      | -----      | -----        | -----       | -----      | -          |      |
| Ictidomys_tridecemlineatus  | -----       | -----       | -----      | -----      | -----        | -----       | -----      | -          |      |
| Canis                       | -----       | -----       | -----      | -----      | -----        | -----       | -----      | -          |      |
| Felis_catus                 | -----       | -----       | -----      | -----      | -----        | -----       | -----      | -          |      |
| Ochotona_princeps           | -----       | -----       | -----      | -----      | -----        | -----       | -----      | -          |      |
| Cercopithecidae             | -----       | -----       | -----      | -----      | -----        | -----       | -----      | -          |      |
| Carnivora                   | -----       | -----       | -----      | -----      | -----        | -----       | -----      | -          |      |
| Mus                         | -----       | -----       | -----      | -----      | -----        | -----       | -----      | -          |      |
| Mus_musculus                | -----       | -----       | -----      | -----      | -----        | -----       | -----      | -          |      |
| Rattus_norvegicus           | -----       | -----       | -----      | -----      | -----        | -----       | -----      | -          |      |
| Tursiops_truncatus          | -----       | -----       | -----      | -----      | -----        | -----       | -----      | -          |      |
| Procapra_capensis           | -----       | -----       | -----      | -----      | -----        | -----       | -----      | -          |      |
| Primates                    | -----       | -----       | -----      | -----      | -----        | -----       | -----      | -          |      |
| Echinops_telfairi           | -----       | -----       | -----      | -----      | -----        | -----       | -----      | -          |      |
| Sorex_araneus               | -----       | -----       | -----      | -----      | -----        | -----       | -----      | -          |      |
| Canidae                     | -----       | -----       | -----      | -----      | -----        | -----       | -----      | -          |      |
| Otomur_garnettii            | -----       | -----       | -----      | -----      | -----        | -----       | -----      | -          |      |
| Gallus                      | -----       | -----       | -----      | -----      | -----        | -----       | -----      | -          |      |
| Callithrix_jacchus          | -----       | -----       | -----      | -----      | -----        | -----       | -----      | -          |      |
| Crocodylus_porosus          | -----       | -----       | -----      | -----      | -----        | -----       | -----      | -          |      |
| Erinaceus_europaeus         | -----       | -----       | -----      | -----      | -----        | -----       | -----      | -          |      |
| rnd-6_family-7426-LTR-ERV1  | -----       | -----       | -----      | -----      | -----        | -----       | -----      | -          |      |
| Esox_lucius                 | -----       | -----       | -----      | -----      | -----        | -----       | -----      | -          |      |
| Salmo_salar                 | -----       | -----       | -----      | -----      | -----        | -----       | -----      | -          |      |
| Didelphidae                 | -----       | -----       | -----      | -----      | -----        | -----       | -----      | -          |      |
| Latimeria_chalumnae         | -----       | -----       | -----      | -----      | -----        | -----       | -----      | -          |      |
| Monodelphis_domestica       | -----       | -----       | -----      | -----      | -----        | -----       | -----      | -          |      |
| Macropus_eugenii            | -----       | -----       | -----      | -----      | -----        | -----       | -----      | -          |      |
| Alligator_mississippiensis  | -----       | -----       | -----      | -----      | -----        | -----       | -----      | -          |      |
| Chrysemys_picta_belli       | AGATTTTCCTT | TAGGAAGCAG  | CTGGACTTCC | AGGGTTAATC | CCCCCTTTCC   | AGCTGCCAG   | AGACTGGAGA | 1226       |      |
| Danio_rerio                 | -----       | -----       | -----      | -----      | -----        | -----       | -----      | -          |      |
| Taeniopygia                 | -----       | -----       | -----      | -----      | -----        | -----       | -----      | -          |      |
| Dasyus_novemcinctus         | -----       | -----       | -----      | -----      | -----        | -----       | -----      | -          |      |
| LTR_XT                      | -----       | -----       | -----      | -----      | -----        | -----       | -----      | -          |      |
| Haplorrhini                 | GGTCAACGCA  | CGGCTGAAGC  | TTGAGGAAAC | GTCAAGCCCT | GCTCTAGTCA   | CACAACCTGGA | AGCTGACTAG | 6361       |      |
| Catarrhini                  | -----       | -----       | -----      | -----      | -----        | -----       | -----      | -          |      |
| Anolis_carolinensis         | -----       | -----       | -----      | -----      | -----        | -----       | -----      | -          |      |
| Murine_leukemia_virus       | -----       | -----       | -----      | AGTT       | ATGGGGATCT   | TGGTGAGGGC  | AGGAGCCTCG | GTACAACGTG | 5752 |
| Phascolarctos_cinereus      | -----       | -----       | -----      | CAGC       | ATAACAACCC   | TCACCAACCC  | ATGACTCTCA | CCTGGCAGGT | 5558 |
| Estrildidae                 | -----       | -----       | -----      | -----      | -----        | -----       | -----      | -          |      |
| Xenopus_Silurana_tropicalis | -----       | -----       | -----      | -----      | -----        | -----       | -----      | -          |      |
| L_XT                        | CANTAATCCA  | CACTAGTCTG  | ATAACCAACG | NTTGNAGATT | AAGGTNNCGT   | ATCAATGGTG  | GGCNTANTCT | 5918       |      |
| Takifugu_rubripes           | -----       | -----       | -----      | -----      | -----        | -----       | -----      | -          |      |
| Bos_taurus                  | -----       | -----       | -----      | -----      | -----        | -----       | -----      | -          |      |
| Homo_sapiens                | -----       | -----       | -----      | -----      | -----        | -----       | -----      | -          |      |
| Microcebus_murinus          | -----       | -----       | -----      | -----      | -----        | -----       | -----      | -          |      |
| Myotis_lucifugus            | -----       | -----       | -----      | -----      | -----        | -----       | -----      | -          |      |
| Equus_caballus              | -----       | -----       | -----      | -----      | -----        | -----       | -----      | -          |      |
| Tupaia_belangeri            | -----       | -----       | -----      | -----      | -----        | -----       | -----      | -          |      |
| Loxodonta_africana          | -----       | -----       | -----      | -----      | -----        | -----       | -----      | -          |      |
| Murinae                     | -----       | -----       | -----      | -----      | -----        | -----       | -----      | -          |      |
| Canis_lupus_familiaris      | -----       | -----       | -----      | -----      | -----        | -----       | -----      | -          |      |
| Sus_scrofa                  | -----       | -----       | -----      | -----      | -----        | -----       | -----      | -          |      |
| Choloepus_hoffmanni         | -----       | -----       | -----      | -----      | -----        | -----       | -----      | -          |      |
| Vicugna_pacos               | -----       | -----       | -----      | -----      | -----        | -----       | -----      | -          |      |
| Gavialis_gangeticus         | -----       | -----       | -----      | -----      | -----        | -----       | -----      | -          |      |
| Mammalia                    | -----       | -----       | -----      | -----      | -----        | -----       | -----      | -          |      |
| Passeroidea                 | -----       | -----       | -----      | -----      | -----        | -----       | -----      | -          |      |
| Takifugu                    | -----       | -----       | -----      | -----      | -----        | -----       | -----      | -          |      |
| Pteropus_vampyrus           | -----       | -----       | -----      | -----      | -----        | -----       | -----      | -          |      |
| Ornithorhynchus             | ACGTCACCTC  | GGAAATCTTA  | TAGAAGAACG | GTATCTCTTC | CAGTTAGGAC   | CAGACCCTAT  | GGAGACCCTC | 537        |      |
| Oryctolagus_cuniculus       | -----       | -----       | -----      | -----      | -----        | -----       | -----      | -          |      |
| Gallus_gallus               | -----       | -----       | -----      | -----      | -----        | -----       | -----      | -          |      |
| Hominidae                   | NGTNCCNANN  | NTTCCNGNAG  | NGNNNANCNC | NTANNNCNC  | CNANCCCGCA   | NNCNNNGN    | NACNNCCCN  | 2705       |      |
| Metatheria                  | -----       | -----       | -----      | -----      | -----        | -----       | -----      | -          |      |
| Rodentia                    | GGTACCCCA   | GCCACGGT    | CTTTAAGGCT | ACGGCTGGCC | CTCTTACCT    | GACCCCTACC  | CTCTCCACC  | 325        |      |
| Monodelphis                 | -----       | -----       | -----      | -----      | -----        | -----       | -----      | -          |      |
| Consensus                   | -----       | -----       | -----      | -----      | -----        | -----       | -----      | -          |      |
| Conservation                | 100%        | -----       | -----      | -----      | -----        | -----       | -----      | 0%         |      |



|                             | 6,460      | 6,480      | 6,500      |             |             |            |            |      |
|-----------------------------|------------|------------|------------|-------------|-------------|------------|------------|------|
| Dipodomys_ordii             | -----      | -----      | -----      | -           |             |            |            |      |
| Laurasiatheria              | -----      | -----      | -----      | -           |             |            |            |      |
| Eutheria                    | -----      | -----      | -----      | -           |             |            |            |      |
| Tarsius_syrichta            | -----      | -----      | -----      | -           |             |            |            |      |
| Muridae                     | GGGAAGGGGA | AAAGTCCCCT | GGGCTGAGCC | CGAAGGAAAA  | GAGAAAAGTTC | CACTCCTTTC | TCTTTTATGA | 848  |
| Gasterosteus_aculeatus      | CGTCTTCACN | GCTCGGAGAC | GCATTACAAC | NGANCCTGA   | GATACGNNT   | TGTATNGNAC | NTCCTGCTNG | 505  |
| Felis_silvestris            | -----      | -----      | -----      | -----       | -----       | -----      | -----      | -    |
| Rattus                      | -----      | -----      | -----      | -----       | -----       | -----      | -----      | -    |
| Papio_hamadryas             | CCCGGACCGG | TGGATAACCA | ACGCACGCCT | AACCCACTAC  | CAGGCCCTCT  | TACTGGACAC | GGACCGCGTC | 3807 |
| Pan_troglodytes             | ACCTAAACGA | TNGATCACNA | ACGCCCGGCT | NACCCACTAC  | CAAGCACTAN  | TACTNAACCC | GCTCAGNATA | 1882 |
| Ailuropoda_melanoleuca      | -----      | -----      | -----      | -----       | -----       | -----      | -----      | -    |
| Cavia_porcellus             | -----      | -----      | -----      | -----       | -----       | -----      | -----      | -    |
| Ictidomys_tridecemlineatus  | -----      | -----      | -----      | -----       | -----       | -----      | -----      | -    |
| Canis                       | -----      | -----      | -----      | -----       | -----       | -----      | -----      | -    |
| Felis_catus                 | -----      | -----      | -----      | -----       | -----       | -----      | -----      | -    |
| Ochotona_princeps           | -----      | -----      | -----      | -----       | -----       | -----      | -----      | -    |
| Cercopithecidae             | -----      | -----      | -----      | -----       | -----       | -----      | -----      | -    |
| Carnivora                   | -----      | -----      | -----      | -----       | -----       | -----      | -----      | -    |
| Mus                         | -----      | -----      | -----      | GGG         | GGGGTAATGT  | TTTGTCTTGT | TTGTTGACGT | 33   |
| Mus_musculus                | -----      | -----      | -----      | -----       | -----       | -----      | -----      | -    |
| Rattus_norvegicus           | -----      | -----      | -----      | -----       | -----       | -----      | -----      | -    |
| Tursiops_truncatus          | -----      | -----      | -----      | -----       | -----       | -----      | -----      | -    |
| Procapra_capensis           | -----      | -----      | -----      | -----       | -----       | -----      | -----      | -    |
| Primates                    | -----      | -----      | -----      | -----       | -----       | -----      | -----      | -    |
| Echinops_telfairi           | -----      | -----      | -----      | -----       | -----       | -----      | -----      | -    |
| Sorex_araneus               | -----      | -----      | -----      | -----       | -----       | -----      | -----      | -    |
| Canidae                     | -----      | -----      | -----      | -----       | -----       | -----      | -----      | -    |
| Otolemur_garnettii          | -----      | -----      | -----      | -----       | -----       | -----      | -----      | -    |
| Gallus                      | -----      | -----      | -----      | -----       | -----       | -----      | -----      | -    |
| Callithrix_jacchus          | -----      | -----      | -----      | -----       | -----       | -----      | -----      | -    |
| Crocodylus_porosus          | -----      | -----      | -----      | -----       | -----       | -----      | -----      | -    |
| Erinaceus_europaeus         | -----      | -----      | -----      | -----       | -----       | -----      | -----      | -    |
| rnd-6_family-7426-LTR-ERV1  | -----      | -----      | -----      | -----       | -----       | -----      | -----      | -    |
| Esox_lucius                 | -----      | -----      | -----      | -----       | -----       | -----      | -----      | -    |
| Salmo_salar                 | -----      | -----      | -----      | -----       | -----       | -----      | -----      | -    |
| Didelphidae                 | -----      | -----      | -----      | -----       | -----       | -----      | -----      | -    |
| Latimeria_chalumnae         | -----      | CCCCT      | TTACACTAAG | AACGAATATC  | TCCATCGATA  | TGAGGAGTCT | CAGCAAAAAG | 55   |
| Monodelphis_domestica       | -----      | -----      | -----      | -----       | -----       | -----      | -----      | -    |
| Macropus_eugenii            | -----      | -----      | -----      | -----       | -----       | -----      | -----      | -    |
| Alligator_mississippiensis  | -----      | -----      | -----      | -----       | -----       | -----      | -----      | -    |
| Chrysemys_picta_bellii      | GGTTGCACTC | TTCAATATGT | AGATGATTTG | CCTTTCTTGA  | GACTTGACTC  | CTGATTGAGG | ACGGACCAAG | 1296 |
| Danio_rerio                 | -----      | -----      | -----      | -----       | -----       | -----      | -----      | -    |
| Taeniopygia                 | -----      | -----      | -----      | -----       | -----       | -----      | -----      | -    |
| Dasybus_novemcinctus        | -----      | -----      | -----      | -----       | -----       | -----      | -----      | -    |
| LTR_XT                      | -----      | -----      | -----      | -----       | -----       | -----      | -----      | -    |
| Haplorrhini                 | TCTACGCATG | GCTGAAGCTT | GAGGAAACGT | CAAGCCCTGC  | TCTAGTCACA  | CAACCGGAAG | CTGACTAGTC | 6431 |
| Catarrhini                  | TCTACGCACG | GCCGAAGCAT | GAGGAGA    | -----       | -----       | TCATCGTGGG | -----      | 5787 |
| Anolis_carolinensis         | -----      | -----      | -----      | -----       | -----       | -----      | ACTCATT    | 1184 |
| Murine_leukemia_virus       | ACAGCCCTCA | CCAGGTCTTC | AATGTCACCT | GG - AGAGTT | ACCAACCTAA  | TGACAGGACA | AACAGCTAAC | 5820 |
| Phascolarctos_cinereus      | ACTGTCCCAG | ACGGGA     | AGTGTCTTTT | GGGAAAAGAA  | AGCAGTCGAG  | CCACCCTGGA | CGTGGTGGCC | 5624 |
| Estrildidae                 | -----      | -----      | -----      | -----       | -----       | -----      | -----      | -    |
| Xenopus_Silurana_tropicalis | -----      | -----      | -----      | -----       | -----       | -----      | -----      | -    |
| IXT                         | TGNCGAATAN | GANTATATCA | TNANCAAGNA | AAAGNGACCT  | TTACAAAACA  | ATGACTCAAT | ATTTGCTNTT | 5988 |
| Takifugu_rubripes           | -----      | -----      | -----      | -----       | -----       | -----      | -----      | -    |
| Bos_taurus                  | -----      | -----      | -----      | -----       | -----       | -----      | -----      | -    |
| Homo_sapiens                | -----      | -----      | -----      | -----       | -----       | -----      | -----      | -    |
| Microcebus_murinus          | -----      | -----      | -----      | -----       | -----       | -----      | -----      | -    |
| Myotis_lucifugus            | -----      | -----      | -----      | -----       | -----       | -----      | -----      | -    |
| Equus_caballus              | -----      | -----      | -----      | -----       | -----       | -----      | -----      | -    |
| Tupaia_belangeri            | -----      | -----      | -----      | -----       | -----       | -----      | -----      | -    |
| Loxodonta_africana          | -----      | -----      | -----      | -----       | -----       | -----      | -----      | -    |
| Murinae                     | -----      | -----      | -----      | -----       | -----       | -----      | -----      | -    |
| Canis_lupus_familiaris      | -----      | -----      | -----      | -----       | -----       | -----      | -----      | -    |
| Sus_scrofa                  | -----      | -----      | -----      | -----       | -----       | -----      | -----      | -    |
| Choloepus_hoffmanni         | -----      | -----      | -----      | -----       | -----       | -----      | -----      | -    |
| Vicugna_pacos               | -----      | -----      | -----      | -----       | -----       | -----      | -----      | -    |
| Gavialis_gangeticus         | -----      | -----      | -----      | -----       | -----       | -----      | -----      | -    |
| Mammalia                    | -----      | -----      | -----      | -----       | -----       | -----      | -----      | -    |
| Passeroidea                 | -----      | -----      | -----      | -----       | -----       | -----      | -----      | -    |
| Takifugu                    | -----      | -----      | -----      | -----       | -----       | -----      | -----      | -    |
| Pteropus_vampyrus           | -----      | -----      | -----      | -----       | -----       | -----      | -----      | -    |
| Ornithorhynchus             | TCCCTTGATG | TGTAATATC  | CAGATACTAA | TTTTTCATGAA | AATTGAATAT  | TAGATGAACC | AATGTGTCCT | 607  |
| Oryctolagus_cuniculus       | -----      | -----      | -----      | -----       | -----       | -----      | -----      | -    |
| Gallus_gallus               | -----      | -----      | -----      | -----       | -----       | -----      | -----      | -    |
| Hominidae                   | NTNNNNGNNN | NNGNCCTCNN | NNNNNTNNN  | NTCANNNTNC  | NCCTCCACNN  | NNANNNTNC  | NTNNNGTNCG | 2775 |
| Metatheria                  | -----      | -----      | -----      | -----       | -----       | -----      | -----      | -    |
| Rodentia                    | ACTGGAGCTG | CAATCCTGCA | GCTTCTTAG  | GCCCNACTGG  | GCTATTGCAC  | CCCTNCCTGC | CCTCTTCTCC | 395  |
| Monodelphis                 | -----      | -----      | -----      | -----       | -----       | -----      | -----      | -    |
| Consensus                   | -----      | -----      | -----      | -----       | -----       | -----      | -----      | -    |
| Conservation                | 100%       | -----      | -----      | -----       | -----       | -----      | -----      | 0%   |

|                             | 6,520      | 6,540       | 6,560      | 6,580      |             |            |             |      |
|-----------------------------|------------|-------------|------------|------------|-------------|------------|-------------|------|
| Dipodomys_ordii             | -----      | -----       | -----      | -----      | -           |            |             |      |
| Laurasiatheria              | -----      | -----       | -----      | -----      | -           |            |             |      |
| Eutheria                    | -----      | -----       | -----      | -----      | -           |            |             |      |
| Tarsius_syrichta            | -----      | -----       | -----      | -----      | -           |            |             |      |
| Muridae                     | TTTATGTCTC | CTTATNAACC  | AATGATCCGT | ATAATTGGAA | AACTCAAAAC  | CCACCATTCT | CTGAAAAAAA  | 918  |
| Gasterosteus_aculeatus      | AAGCAATAAA | TAGAGCNNTA  | NGNAGTTGGA | GTATTNGACA | GCAACTATTN  | NATCGANAAA | NCANTCTTNT  | 575  |
| Felis_silvestris            | -----      | -----       | -----      | -----      | -----       | -----      | -----       | -    |
| Rattus                      | -----      | -----       | -----      | -----      | -----       | -----      | -----       | -    |
| Papio_hamadryas             | CAGTTTGGCC | CTCCGGTCAC  | CCTAAACCCT | GCTACGCTGC | TGCCGGTACC  | AGAAAACCAA | CCAAGCCAC   | 3877 |
| Pan_troglodytes             | ATTTTCNNCC | CACCAGTTAC  | TTTAAANCCT | GCCGCNCTGC | TACCCNACCC  | GGACANAGAT | GTGAGACNCC  | 1952 |
| Ailuropoda_melanoleuca      | -----      | -----       | -----      | -----      | -----       | -----      | -----       | -    |
| Cavia_porcellus             | -----      | -----       | -----      | -----      | -----       | -----      | -----       | -    |
| Ictidomys_tridecemlineatus  | -----      | -----       | -----      | -----      | -----       | -----      | -----       | -    |
| Canis                       | -----      | -----       | -----      | -----      | -----       | -----      | -----       | -    |
| Felis_catus                 | -----      | -----       | -----      | -----      | -----       | -----      | -----       | -    |
| Ochotona_princeps           | -----      | -----       | -----      | -----      | -----       | -----      | -----       | -    |
| Cercopithecidae             | -----      | -----       | -GCCGCTGGT | CTCGCGACCT | GGTCCCAGCC  | CGTCGGCGTC | TCTCTTAACC  | 49   |
| Carnivora                   | -----      | -----       | -----      | -----      | -----       | -----      | -----       | -    |
| Mus                         | ATTGTTTTTA | GGTGAAGGTG  | AGACCGAGGG | ACGGGGGCGG | CTGATACTGC  | CCCTCGTTTT | GCAGGCTTTG  | 103  |
| Mus_musculus                | -----      | -----       | -----      | -----      | -----       | -----      | -----       | -    |
| Rattus_norvegicus           | -----      | -----       | -----      | -----      | -----       | -----      | -----       | -    |
| Tursiops_truncatus          | -----      | -----       | -----      | -----      | -----       | -----      | -----       | -    |
| Procapra_capensis           | -----      | -----       | -----      | -----      | -----       | -----      | -----       | -    |
| Primates                    | -----      | -----       | -----      | -----      | -----       | -----      | -----       | -    |
| Echinops_telfairi           | -----      | -----       | -----      | -----      | -----       | -----      | -----       | -    |
| Sorex_araneus               | -----      | -----       | -----      | -----      | -----       | -----      | -----       | -    |
| Canidae                     | -----      | -----       | -----      | -----      | -----       | -----      | -----       | -    |
| Otomur_garnettii            | -----      | -----       | -----      | -----      | -----       | -----      | -----       | -    |
| Gallus                      | -----      | -----       | -----      | -----      | -----       | -----      | -----       | -    |
| Callithrix_jacchus          | -----      | -----       | -----      | -----      | -----       | -----      | -----       | -    |
| Crocodylus_porosus          | -----      | -----       | -----      | -----      | -----       | -----      | -----       | -    |
| Erinaceus_europaeus         | -----      | -----       | -----      | -----      | -----       | -----      | -----       | -    |
| rnd-6_family-7426-LTR-ERV1  | -----      | -----       | -----      | -----      | -----       | -----      | -----       | -    |
| Esox_lucius                 | -----      | -----       | -----      | -----      | -----       | -----      | -----       | -    |
| Salmo_salar                 | -----      | -----       | -----      | -----      | -----       | -----      | -----       | -    |
| Didelphidae                 | -----      | -----       | -----      | -----      | -----       | -----      | -----       | -    |
| Latimeria_chalumnae         | ACAACCAAGC | ATCCGGCGAC  | GGAACCTGTC | TCAATAAATC | CTCTTGAAAA  | ATTAGCTCAT | GCCCATTTCA  | 125  |
| Monodelphis_domestica       | -----      | -----       | -----      | -----      | -----       | -----      | -----       | -    |
| Macropus_eugenii            | -----      | -----       | -----      | -----      | -----       | -----      | -----       | -    |
| Alligator_mississippiensis  | -----      | -----       | -----      | -----      | -----       | -----      | -----       | -    |
| Chrysemys_picta_belli       | CATCCGCAT  | ACTGGTTTCA  | CATCAGGGGC | ACTTCAAGGA | AGCTATCATT  | CCTACCGCAC | TCGTGCGTTT  | 1366 |
| Danio_rerio                 | -----      | -----       | -----      | -----      | -----       | -----      | -----       | -    |
| Taeniopygia                 | -----      | -----       | -----      | -----      | -----       | -----      | -----       | -    |
| Dasybus_novemcinctus        | -----      | -----       | -----      | -----      | -----       | -----      | -----       | -    |
| LTR_XT                      | -----      | -----       | -----      | -----      | -----       | -----      | -----       | -    |
| Haplorrhini                 | TACGCACGGC | CGAAGCCTGA  | GGAAGCCAGC | GCTAGATAAG | TAAATGTGGA  | TTGAATTTGC | AAGTGTAGTT  | 6501 |
| Catarrhini                  | TTCTT----- | -----       | -----      | -----      | -----TATAAT | TTGGACTTGT | A----TAGTA  | 5814 |
| Anolis_carolinensis         | -----      | -----       | -----      | -----      | -----       | -----      | -----       | 1184 |
| Murine_leukemia_virus       | GCCACCTCCC | TCC-----TGG | GGACGATGAC | AGACACCTTC | -----CCTAAA | CTATATTTTG | AC---CTGTG  | 5879 |
| Phascolarctos_cinereus      | CTCTCTTGAG | CCTGATGTGT  | GCGCGCTGGT | AGCCCGTCTC | GAGTCCTGGG  | ACATCCCGGA | ACTCACTGCA  | 5694 |
| Estrildidae                 | -----      | -----       | -----      | -----      | -----       | -----      | -----       | -    |
| Xenopus_Silurana_tropicalis | -----      | -----       | -----      | -----      | -----       | -----      | -----       | -    |
| L_XT                        | CTGGNTAAAG | NTTcntATCA  | TTNANNCTT  | TCCCTTTTCA | CTCCAGTTAA  | ANGNNGGTTA | GNNTNAAAATN | 6058 |
| Takifugu_rubripes           | -----      | -----       | -----      | -----      | -----       | -----      | -----       | -    |
| Bos_taurus                  | -----      | -----       | -----      | -----      | -----       | -----      | -----       | -    |
| Homo_sapiens                | -----      | -----       | -----      | -----      | -----       | -----      | -----       | -    |
| Microcebus_murinus          | -----      | -----       | -----      | -----      | -----       | -----      | -----       | -    |
| Myotis_lucifugus            | -----      | -----       | -----      | -----      | -----       | -----      | -----       | -    |
| Equus_caballus              | -----      | -----       | -----      | -----      | -----       | -----      | -----       | -    |
| Tupaia_belangeri            | -----      | -----       | -----      | -----      | -----       | -----      | -----       | -    |
| Loxodonta_africana          | -----      | -----       | -----      | -----      | -----       | -----      | -----       | -    |
| Murinae                     | -----      | -----       | -----      | -----      | -----       | -----      | -----       | -    |
| Canis_lupus_familiaris      | -----      | -----       | -----      | -----      | -----       | -----      | -----       | -    |
| Sus_scrofa                  | -----      | -----       | -----      | -----      | -----       | -----      | -----       | -    |
| Choloepus_hoffmanni         | -----      | -----       | -----      | -----      | -----       | -----      | -----       | -    |
| Vicugna_pacos               | -----      | -----       | -----      | -----      | -----       | -----      | -----       | -    |
| Gavialis_gangeticus         | -----      | -----       | -----      | -----      | -----       | -----      | -----       | -    |
| Mammalia                    | -----      | -----       | -----      | -----      | -----       | -----      | -----       | -    |
| Passeroidea                 | -----      | -----       | -----      | -----      | -----       | -----      | -----       | -    |
| Takifugu                    | -----      | -----       | -----      | -----      | -----       | -----      | -----       | -    |
| Pteropus_vampyrus           | -----      | -----       | -----      | -----      | -----       | -----      | -----       | -    |
| Ornithorhynchus             | TGCTAATAGA | AGCAATGAAT  | TTATCTTTCA | GCAAATTAAG | TTGGTATCAA  | GAGTGACGGA | GAGCCTTTTT  | 677  |
| Oryctolagus_cuniculus       | -----      | -----       | -----      | -----      | -----       | -----      | -----       | -    |
| Gallus_gallus               | -----      | -----       | -----      | -----      | -----       | -----      | -----       | -    |
| Hominidae                   | NTTNCNNNNN | GNNAGNCCNN  | NNCNCNNNNN | NCTNCTCGCA | NNNNNNNTNG  | NCCGNNNNNN | NGNNAGNNNN  | 2845 |
| Metatheria                  | -----      | -----       | -----      | -----      | -----       | -----      | -----       | -    |
| Rodentia                    | CGTTCCTCC  | TTGGAGCTGC  | CTGTAATCCC | ACAGCTTCTC | TAGGCCCTCG  | TGGCTTTTGC | GACTCCATTC  | 465  |
| Monodelphis                 | -----      | -----       | -----      | -----      | -----       | -----      | -----       | -    |
| Consensus                   | -----      | -----       | -----      | -----      | -----       | -----      | -----       | -    |
| Conservation                | 100%       | -----       | -----      | -----      | -----       | -----      | -----       | 0%   |

|                             | 6,600       | 6,620       | 6,640      |             |            |             |             |      |
|-----------------------------|-------------|-------------|------------|-------------|------------|-------------|-------------|------|
| Dipodomys_ordii             | -----       | -----       | -----      | -           |            |             |             |      |
| Laurasiatheria              | -----       | -----       | -----      | -           |            |             |             |      |
| Eutheria                    | -----       | -----       | -----      | -           |            |             |             |      |
| Tarsius_syrichtha           | -----       | -----       | -----      | -           |            |             |             |      |
| Muridae                     | GCNAAGAAAT  | AAACAAAANG  | GACTTCCCCT | TCTGTCCAAC  | ACTGACCAAG | GAGACTTTAA  | ACANTTTTNG  | 988  |
| Gasterosteus_aculeatus      | CATNCACNNT  | NNGANATAGA  | CNGAATGAGA | AGCAAAATGG  | TAGTAATGCA | TGAAAAACAA  | AACAATGGGG  | 645  |
| Felis_silvestris            | -----       | -----       | -----      | -----       | -----      | -----       | -----       | -    |
| Rattus                      | -----       | -----       | -----      | -----       | -----      | -----       | -----       | -    |
| Papio_hamadryas             | ACGATTGTGCG | GCAAGTACTG  | GCTGAGACCC | ATGGAACACG  | AGAAGACCTT | AAAGACCAAG  | AGCTCCCAGA  | 3947 |
| Pan_troglodytes             | ATGACTGNNN  | AAAGNTGNNN  | GCTCAGGCNC | ACGGANTTCG  | AGAAGACCTG | CAGGACTGCG  | AACTTCCTGA  | 2022 |
| Ailuropoda_melanoleuca      | -----       | -----       | -----      | -----       | -----      | -----       | -----       | -    |
| Cavia_porcellus             | -----       | -----       | -----      | -----       | -----      | -----       | -----       | -    |
| Ictidomys_tridecemlineatus  | -----       | -----       | -----      | -----       | -----      | -----       | -----       | -    |
| Canis                       | -----       | -----       | -----      | -----       | -----      | -----       | -----       | -    |
| Felis_catus                 | -----       | -----       | -----      | -----       | -----      | -----       | -----       | -    |
| Ochotona_princeps           | -----       | -----       | -----      | -----       | -----      | -----       | -----       | -    |
| Cercopithecidae             | CTATGATCCA  | TAATGAGTGG  | CCGAGGACTT | TTTACAAATCG | GGGAATCTAT | TGGATCCTGC  | CTCTACCAAC  | 119  |
| Carnivora                   | -----       | -----       | -----      | -----       | -----      | -----       | -----       | -    |
| Mus                         | TCTGTTGTGT  | TTTTTTTAAAT | GGGAAGACGT | GCACCCTTAC  | TGCCATTGAC | GATTAGCTAG  | GCAAATTTAG  | 173  |
| Mus_musculus                | -----       | -----       | -----      | -----       | -----      | -----       | -----       | -    |
| Rattus_norvegicus           | -----       | -----       | -----      | -----       | -----      | -----       | -----       | -    |
| Tursiops_truncatus          | -----       | -----       | -----      | -----       | -----      | -----       | -----       | -    |
| Procapra_capensis           | -----       | -----       | -----      | -----       | -----      | -----       | -----       | -    |
| Primates                    | -----       | -----       | -----      | -----       | -----      | -----       | -----       | -    |
| Echinops_telfairi           | -----       | -----       | -----      | -----       | -----      | -----       | -----       | -    |
| Sorex_araneus               | -----       | -----       | -----      | -----       | -----      | -----       | -----       | -    |
| Canidae                     | -----       | -----       | -----      | -----       | -----      | -----       | -----       | -    |
| Otolemur_garnettii          | -----       | -----       | -----      | -----       | -----      | -----       | -----       | -    |
| Gallus                      | -----       | -----       | -----      | -----       | -----      | -----       | -----       | -    |
| Callithrix_jacchus          | -----       | -----       | -----      | -----       | -----      | -----       | -----       | -    |
| Crocodylus_porosus          | -----       | -----       | -----      | -----       | -----      | -----       | -----       | -    |
| Erinaceus_europaeus         | -----       | -----       | -----      | -----       | -----      | -----       | -----       | -    |
| rnd-6_family-7426-LTR-ERV1  | -----       | -----       | -----      | -----       | -----      | -----       | -----       | -    |
| Esox_lucius                 | -----       | -----       | -----      | -----       | -----      | -----       | -----       | -    |
| Salmo_salar                 | -----       | -----       | -----      | -----       | -----      | -----       | -----       | -    |
| Didelphidae                 | -----       | -----       | -----      | -----       | -----      | -----       | -----       | -    |
| Latimeria_chalumnae         | GTATGCCCGA  | CAATATAAATG | GGGCTATAAA | GCGATAAAAT  | CACGAGGCCA | GTTGCAAAAA  | AAAAGTGGTA  | 195  |
| Monodelphis_domestica       | -----       | -----       | -----      | -----       | -----      | -----       | -----       | -    |
| Macropus_eugenii            | -----       | -----       | -----      | -----       | -----      | -----       | -----       | -    |
| Alligator_mississippiensis  | -----       | -----       | -----      | -----       | -----      | -----       | -----       | -    |
| Chrysemys_picta_belli       | CTGGGCATGG  | CGGTTTGAG   | AATGGATCCA | GATTGAGGCT  | AAACCTAGAA | TAAGGAGGCC  | TGACCCTTC   | 1436 |
| Danio_rerio                 | -----       | -----       | -----      | -----       | -----      | -----       | -----       | -    |
| Taeniopygia                 | -----       | -----       | -----      | -----       | -----      | -----       | -----       | -    |
| Dasybus_novemcinctus        | -----       | -----       | -----      | -----       | -----      | -----       | -----       | -    |
| LTR_XT                      | -----       | -----       | -----      | -----       | -----      | -----       | -----       | -    |
| Haplorrhini                 | ATACTATTGC  | TTATACTGAT  | TGTCTTGCTG | TCATGCTATC  | TTTGCAATTG | CTATCAAACCT | TGTTGCCCCAG | 6571 |
| Catarrhini                  | AAA-----AC  | TTCACTGAT   | TTTC-----  | -----       | -----      | -----       | -----       | 5838 |
| Anolis_carolinensis         | -----       | -----       | -----      | -----       | -----      | -----       | -----       | 1184 |
| Murine_leukemia_virus       | TGA-----    | TTTAGTNGG-  | -AGACNACTG | GG-----     | -----      | TGA-----    | CCGGAACCCGA | 5918 |
| Phascolarctos_cinereus      | TGGG---CCT  | CTCAACAGGC  | CAGGCCCCCT | GATTCA----  | -----      | TGAACATGCT  | TATAATCAGA  | 5752 |
| Estrildidae                 | -----       | -----       | -----      | -----       | -----      | -----       | -----       | -    |
| Xenopus_Silurana_tropicalis | -----       | -----       | -----      | -----       | -----      | -----       | -----       | -    |
| IXT                         | CTATGNNTT   | TTNATNCTAG  | CAGNATGGAA | ANTAGATACA  | TAATACTNAC | NGNTGAAGNN  | GTTAATCNGT  | 6128 |
| Takifugu_rubripes           | -----       | -----       | -----      | -----       | -----      | -----       | -----       | -    |
| Bos_taurus                  | -----       | -----       | -----      | -----       | -----      | -----       | -----       | -    |
| Homo_sapiens                | -----       | -----       | -----      | -----       | -----      | -----       | -----       | -    |
| Microcebus_murinus          | -----       | -----       | -----      | -----       | -----      | -----       | -----       | -    |
| Myotis_lucifugus            | -----       | -----       | -----      | -----       | -----      | -----       | -----       | -    |
| Equus_caballus              | -----       | -----       | -----      | -----       | -----      | -----       | -----       | -    |
| Tupaia_belangeri            | -----       | -----       | -----      | -----       | -----      | -----       | -----       | -    |
| Loxodonta_africana          | -----       | -----       | -----      | -----       | -----      | -----       | -----       | -    |
| Murinae                     | -----       | -----       | -----      | -----       | -----      | -----       | -----       | -    |
| Canis_lupus_familiaris      | -----       | -----       | -----      | -----       | -----      | -----       | -----       | -    |
| Sus_scrofa                  | -----       | -----       | -----      | -----       | -----      | -----       | -----       | -    |
| Choloepus_hoffmanni         | -----       | -----       | -----      | -----       | -----      | -----       | -----       | -    |
| Vicugna_pacos               | -----       | -----       | -----      | -----       | -----      | -----       | -----       | -    |
| Gavialis_gangeticus         | -----       | -----       | -----      | -----       | -----      | -----       | -----       | -    |
| Mammalia                    | -----       | -----       | -----      | -----       | -----      | -----       | -----       | -    |
| Passeroidea                 | -----       | -----       | -----      | -----       | -----      | -----       | -----       | -    |
| Takifugu                    | -----       | -----       | -----      | -----       | -----      | -----       | -----       | -    |
| Pteropus_vampyrus           | -----       | -----       | -----      | -----       | -----      | -----       | -----       | -    |
| Ornithorhynchus             | CTGTTTCT    | CGTTAATATC  | TACTTAAGTA | TGCAGTTGGT  | TTTTAGTTCT | AGCCAAAACCT | TTTACAATGG  | 747  |
| Oryctolagus_cuniculus       | -----       | -----       | -----      | -----       | -----      | -----       | -----       | -    |
| Gallus_gallus               | -----       | -----       | -----      | -----       | -----      | -----       | -----       | -    |
| Hominiidae                  | CCGAGACAGN  | CCTNNNNNCT  | TTNGNCNGNN | NCTNNCTAAA  | GNCNNNNNN  | CATGCNCNNT  | GNCCNNNNNN  | 2915 |
| Metatheria                  | -----       | -----       | -----      | -----       | -----      | -----       | -----       | -    |
| Rodentia                    | CCNACCCTT   | CCCGTGGATG  | AGACCCCAT  | CCTGAGCTCG  | GTTTTGCTTC | CTTTTGACC   | TTCTGGCCTC  | 535  |
| Monodelphis                 | -----       | -----       | -----      | -----       | -----      | -----       | -----       | -    |
| Consensus                   | -----       | -----       | -----      | -----       | -----      | -----       | -----       | -    |
| Conservation                | 100%        | -----       | -----      | -----       | -----      | -----       | -----       | 0%   |

|                             | 6,660       | 6,680      | 6,700       | 6,720      |             |                |            |      |
|-----------------------------|-------------|------------|-------------|------------|-------------|----------------|------------|------|
| Dipodomys_ordii             | -----       | -----      | -----       | -----      | -           |                |            |      |
| Laurasiatheria              | -----       | -----      | -----       | -----      | -           |                |            |      |
| Eutheria                    | -----       | -----      | -----       | -----      | -           |                |            |      |
| Tarsius_syrichta            | -----       | -----      | -----       | -----      | -           |                |            |      |
| Muridae                     | CTAGGTCCTT  | TTNAAAGGAT | TAAAACAAAT  | GCTGCNAAAA | AGATTTTCCTT | TGTCACCCAG     | TGGGCCCCAG | 1058 |
| Gasterosteus_aculeatus      | CTCACAGGCA  | CTGCACGTCA | CAGAAGGTCG  | GAATAGGGAG | GGAGCGAGAA  | AACATGAACG     | GGAAAACCGT | 715  |
| Felis_silvestris            | -----       | -----      | -----       | -----      | -----       | -----          | -----      | -    |
| Rattus                      | -----       | -----      | -----       | -----      | -----       | -----          | -----      | -    |
| Papio_hamadryas             | CGCGGATCAC  | ACCTGGTACA | CAGACGGCAG  | CAGTTACCTT | GACTCAGGTA  | CTCGGAGGGC     | GGGAGCAGCG | 4017 |
| Pan_troglodytes             | CGCNNACCNC  | AGTTGGTACA | CAGACGGTAG  | CAGCTTCATG | GANTCAGGTA  | CTGGGGACGC     | TGGGGCGGCA | 2092 |
| Ailuropoda_melanoleuca      | -----       | -----      | -----       | -----      | -----       | -----          | -----      | -    |
| Cavia_porcellus             | -----       | -----      | -----       | -----      | -----       | -----          | -----      | -    |
| Ictidomys_tridecemlineatus  | -----       | -----      | -----       | -----      | -----       | -----          | -----      | -    |
| Canis                       | -----       | -----      | -----       | -----      | -----       | -----          | -----      | -    |
| Felis_catus                 | -----       | -----      | -----       | -----      | -----       | -----          | -----      | -    |
| Ochotona_princeps           | -----       | -----      | -----       | -----      | -----       | -----          | -----      | -    |
| Cercopithecidae             | CTCCGACCCC  | CCCCCCCCCG | CCCCACCCC   | GCCCCACTCC | TCGAGCCGTG  | TTTTATGCAT     | TTCACCATTC | 189  |
| Carnivora                   | -----       | -----      | -----       | -----      | -----       | -----          | -----      | -    |
| Mus                         | TAAAACCTGGA | CTTTTGTCTC | ATGGCCTTTG  | GTGGTGGCCC | AGGATTTTCT  | CATGTAATTT     | TTTTCAGGCG | 243  |
| Mus_musculus                | -----       | -----      | -----       | -----      | -----       | -----          | -----      | -    |
| Rattus_norvegicus           | -----       | -----      | -----       | -----      | -----       | -----          | -----      | -    |
| Tursiops_truncatus          | -----       | -----      | -----       | -----      | -----       | -----          | -----      | -    |
| Procavia_capensis           | -----       | -----      | -----       | -----      | -----       | -----          | -----      | -    |
| Primates                    | -----       | -----      | -----       | -----      | -----       | -----          | -----      | -    |
| Echinops_telfairi           | -----       | -----      | -----       | -----      | -----       | -----          | -----      | -    |
| Sorex_araneus               | -----       | -----      | -----       | -----      | -----       | -----          | -----      | -    |
| Canidae                     | -----       | -----      | -----       | -----      | -----       | -----          | -----      | -    |
| Otolemur_garnettii          | -----       | -----      | -----       | -----      | -----       | -----          | -----      | -    |
| Gallus                      | -----       | -----      | -----       | -----      | -----       | -----          | -----      | -    |
| Callithrix_jacchus          | -----       | -----      | -----       | -----      | -----       | -----          | -----      | -    |
| Crocodylus_porosus          | -----       | -----      | -----       | -----      | -----       | -----          | -----      | -    |
| Erinaceus_europaeus         | -----       | -----      | -----       | -----      | -----       | -----          | -----      | -    |
| rnd-6_family-7426-LTR-ERV1  | -----       | -----      | -----       | -----      | -----       | -----          | -----      | -    |
| Esox_lucius                 | -----       | -----      | -----       | -----      | -----       | -----          | -----      | -    |
| Salmo_salar                 | -----       | -----      | -----       | -----      | -----       | -----          | -----      | -    |
| Didelphidae                 | -----       | -----      | -----       | -----      | -----       | -----          | -----      | -    |
| Latimeria_chalumnae         | CAAGGTTTAA  | ATTGTGAGAG | ATTGCTTTAT  | ACATCAGAGA | ACTATGTATC  | AGAGAAGATC     | TCCTGATTCC | 265  |
| Monodelphis_domestica       | -----       | -----      | -----       | -----      | -----       | -----          | -----      | -    |
| Macropus_eugenii            | -----       | -----      | -----       | -----      | -----       | -----          | -----      | -    |
| Alligator_mississippiensis  | -----       | -----      | -----       | -----      | -----       | -----          | -----      | -    |
| Chrysemys_picta_belli       | TGGTCCCCAG  | AGCGACGCTT | TTAAAACCTGG | CCCCGCCTG  | GGCTGCCGAC  | TAAGCCTTCT     | TCATGAAAAG | 1506 |
| Danio_rerio                 | -----       | -----      | -----       | -----      | -----       | -----          | -----      | -    |
| Taeniopygia                 | -----       | -----      | -----       | -----      | -----       | -----          | -----      | -    |
| Dasybus_novemcinctus        | -----       | -----      | -----       | -----      | -----       | -----          | -----      | -    |
| LTR_XT                      | -----       | -----      | -----       | -----      | -----       | -----          | -----      | -    |
| Haplorrhini                 | GAGGATGCCC  | GTGCATAGTA | TAAACTTGAT  | CACACTAGTG | ACAATAATGC  | TAACAGGCAT     | GGGAGGAAAC | 6641 |
| Catarrhini                  | ATGGAGGACT  | GCTCTCAGTG | TATAC--AT   | CAGGTTACCG | A-----      | -----GGTAG     | GGCAACAAGT | 5891 |
| Anolis_carolinensis         | -----       | -----      | -----       | -----      | -----       | -----          | -----      | 1184 |
| Murine_leukemia_virus       | TA--TTGGAG  | AT-----GGT | TGCCGCTCTC  | CCGGGGGAAG | A-----      | -----AAAAGGAC  | AAGACTGTAT | 5970 |
| Phascolarctos_cinereus      | TCACCTTGGG  | AACCTGGGA  | TGTAGCTATC  | CCCCGGCCAG | A-----      | -----ACAAGAAAT | TGCTAGGTCC | 5811 |
| Estrildidae                 | -----       | -----      | -----       | -----      | -----       | -----          | -----      | -    |
| Xenopus_Silurana_tropicalis | TCNAGTTAGN  | CNAAAGNNTA | GACCNNTAGT  | AGGGATACCT | ATCNCTANAA  | ATGCNCANAA     | TNNTANAGGT | 6198 |
| I_XT                        | -----       | -----      | -----       | -----      | -----       | -----          | -----      | -    |
| Takifugu_rubripes           | -----       | -----      | -----       | -----      | -----       | -----          | -----      | -    |
| Bos_taurus                  | -----       | -----      | -----       | -----      | -----       | -----          | -----      | -    |
| Homo_sapiens                | -----       | -----      | -----       | -----      | -----       | -----          | -----      | -    |
| Microcebus_murinus          | -----       | -----      | -----       | -----      | -----       | -----          | -----      | -    |
| Myotis_lucifugus            | -----       | -----      | -----       | -----      | -----       | -----          | -----      | -    |
| Equus_caballus              | -----       | -----      | -----       | -----      | -----       | -----          | -----      | -    |
| Tupaia_belangeri            | -----       | -----      | -----       | -----      | -----       | -----          | -----      | -    |
| Loxodonta_africana          | -----       | -----      | -----       | -----      | -----       | -----          | -----      | -    |
| Murinae                     | -----       | -----      | -----       | -----      | -----       | -----          | -----      | -    |
| Canis_lupus_familiaris      | -----       | -----      | -----       | -----      | -----       | -----          | -----      | -    |
| Sus_scrofa                  | -----       | -----      | -----       | -----      | -----       | -----          | -----      | -    |
| Choloepus_hoffmanni         | -----       | -----      | -----       | -----      | -----       | -----          | -----      | -    |
| Vicugna_pacos               | -----       | -----      | -----       | -----      | -----       | -----          | -----      | -    |
| Gavialis_gangeticus         | -----       | -----      | -----       | -----      | -----       | -----          | -----      | -    |
| Mammalia                    | -----       | -----      | -----       | -----      | -----       | -----          | -----      | -    |
| Passeroidea                 | -----       | -----      | -----       | -----      | -----       | -----          | -----      | -    |
| Takifugu                    | -----       | -----      | -----       | -----      | -----       | -----          | -----      | -    |
| Pteropus_vampyrus           | -----       | -----      | -----       | -----      | -----       | -----          | -----      | -    |
| Ornithorhynchus             | AAAATAGGAT  | TTTTAGTACA | TAGGTCTGAT  | AAGCCCTAGG | AAAACAATGG  | GGTGAAGGAA     | TTGCAGAATC | 817  |
| Oryctolagus_cuniculus       | -----       | -----      | -----       | -----      | -----       | -----          | -----      | -    |
| Gallus_gallus               | -----       | -----      | -----       | -----      | -----       | -----          | -----      | -    |
| Hominiidae                  | ANNNTNCTNC  | NNNANGNNTA | NGNCNNTCNN  | NNTNCCAGN  | NNNNCCNNGT  | NTNNNTCNEN     | NNNNGANNNT | 2985 |
| Metatheria                  | -----       | -----      | -----       | -----      | -----       | -----          | -----      | -    |
| Rodentia                    | TCGAAAGCCC  | TGGTACCAGG | CGCCGAGTCT  | CCTAGGCGGT | TAGCCCTGAA  | CCCCGTTGAG     | TGTGGTGATG | 605  |
| Monodelphis                 | -----       | -----      | -----       | -----      | -----       | -----          | -----      | -    |
| Consensus                   | -----       | -----      | -----       | -----      | -----       | -----          | -----      | -    |
| Conservation                | 100%        | -----      | -----       | -----      | -----       | -----          | -----      | 0%   |

|                             | 6,740      |            | 6,760      |             | 6,780       |                             |               |
|-----------------------------|------------|------------|------------|-------------|-------------|-----------------------------|---------------|
| Dipodomys_ordii             | ----       | ----       | ----       | ----        | ----        | -                           |               |
| Laurasiatheria              | ----       | ----       | ----       | ----        | ----        | -                           |               |
| Eutheria                    | ----       | ----       | ----       | ----        | ----        | -                           |               |
| Tarsius_syrichtha           | ----       | ----       | ----       | ----        | ----        | -                           |               |
| Muridae                     | ATATTAGAGA | AGAAGTTATA | AAAGTTAAAA | AAATTAAAAAG | TATAAACATT  | AAAGGATAAG TAGGTCCCAG 1128  |               |
| Gasterosteus_aculeatus      | CCAACCCGCG | CACACCAGAA | GTTTCCCAGC | CCGTCGACGT  | AGCAAACCCT  | CATGCATAAG TGACATGAAA 785   |               |
| Felis_silvestris            | ----       | ----       | ----       | ----        | ----        | -                           |               |
| Rattus                      | ----       | ----       | ----       | ----        | ----        | -                           |               |
| Papio_hamadryas             | GTAGTAGACG | GACACAATAC | CATTTGGGCA | CAATCACTAC  | CTCCTGGCAC  | GTCTGCACAG AAGGCTGAGT 4087  |               |
| Pan_troglodytes             | GTAATANAAG | NNNCNGCTGT | GATNTGGGCG | CAGTCTCTGC  | CGCCGGGGAC  | GTCCGCCAG AAGGCCGAAC 2162   |               |
| Ailuropoda_melanoleuca      | ----       | ----       | ----       | ----        | ----        | -                           |               |
| Cavia_porcellus             | ----       | ----       | ----       | ----        | ----        | -                           |               |
| Ictidomys_tridecemlineatus  | ----       | ----       | ----       | ----        | ----        | -                           |               |
| Canis                       | ----       | ----       | ----       | ----        | ----        | -                           |               |
| Felis_catus                 | ----       | ----       | ----       | ----        | ----        | -                           |               |
| Ochotona_princeps           | ----       | ----       | ----       | ----        | ----        | -                           |               |
| Cercopithecidae             | AACACTGGAG | ACATTTCCGA | GAAGTCGGCG | AGCCGGCCCC  | CAGGTCCCC   | TGGGACTAAG AGGAGGCCAT 259   |               |
| Carnivora                   | ----       | ----       | ----       | ----        | ----        | -                           |               |
| Mus                         | GCATCCGACA | CCTATAGTTG | GAGATGGCAC | CCCTGTCCG   | TTGCAAAAAG  | AAACCGGCC                   | GCCAACTAT 313 |
| Mus_musculus                | ----       | ----       | ----       | ----        | ----        | -                           |               |
| Rattus_norvegicus           | ----       | ----       | ----       | ----        | ----        | -                           |               |
| Tursiops_truncatus          | ----       | ----       | ----       | ----        | ----        | -                           |               |
| Procavia_capensis           | ----       | ----       | ----       | ----        | ----        | -                           |               |
| Primates                    | ----       | ----       | ----       | ----        | ----        | -                           |               |
| Echinops_telfairi           | ----       | ----       | ----       | ----        | ----        | -                           |               |
| Sorex_araneus               | ----       | ----       | ----       | ----        | ----        | -                           |               |
| Canidae                     | ----       | ----       | ----       | ----        | ----        | -                           |               |
| Otolemur_garnettii          | ----       | ----       | ----       | ----        | ----        | -                           |               |
| Gallus                      | ----       | ----       | ----       | ----        | ----        | -                           |               |
| Callithrix_jacchus          | ----       | ----       | ----       | ----        | ----        | -                           |               |
| Crocodylus_porosus          | ----       | ----       | ----       | ----        | ----        | -                           |               |
| Erinaceus_europaeus         | ----       | ----       | ----       | ----        | ----        | -                           |               |
| rnd-6_family-7426-LTR-ERV1  | ----       | ----       | ----       | ----        | ----        | -                           |               |
| Esox_lucius                 | ----       | ----       | ----       | ----        | ----        | -                           |               |
| Salmo_salar                 | ----       | ----       | ----       | ----        | ----        | -                           |               |
| Didelphidae                 | ----       | ----       | ----       | ----        | ----        | -                           |               |
| Latimeria_chalumnae         | CTTGATTCAA | TTGCGACTAT | TCTATTACCC | TGCGATCTC   | TATACTGTGT  | TCCAAAGTCT TCTCTGTTT 335    |               |
| Monodelphis_domestica       | ----       | ----       | ----       | ----        | ----        | -                           |               |
| Macropus_eugenii            | ----       | ----       | ----       | ----        | ----        | -                           |               |
| Alligator_mississippiensis  | ----       | ----       | ----       | ----        | ----        | -                           |               |
| Chrysemys_picta_belli       | GGTGCCTGGG | AGTTACTCAG | TGGGCAACGT | CCGTGGCTAT  | TTCTCTACTG  | GACGTTGCAG GTCCTGCTG 1576   |               |
| Danio_rerio                 | ----       | ----       | ----       | ----        | ----        | -                           |               |
| Taeniopygia                 | ----       | ----       | ----       | ----        | ----        | -                           |               |
| Dasybus_novemcinctus        | ----       | ----       | ----       | ----        | ----        | -                           |               |
| LTR_XT                      | ----       | ----       | ----       | ----        | ----        | -                           |               |
| Haplorrhini                 | CAAGATAATT | GTCATCATTG | TATGATAGAA | GCTTGGTCTG  | GTAAGGTAT   | AACTAAAACC CTGTTATATC 6711  |               |
| Catarrhini                  | TAAACAATC  | TTT-----   | ----       | ----        | ----        | CTGTTCTAT- 5913             |               |
| Anolis_carolinensis         | ----       | ----       | ----       | ----        | ----        | 1184                        |               |
| Murine_leukemia_virus       | GACTTCTATG | TTTGCCCC-- | ----GGTCAT | ACTGTACCAA  | TAG-----G   | GTGTGGAGGG CCGGGAGAGG 6028  |               |
| Phascolarctos_cinereus      | CAGTTCTACG | TGTGCCCCCG | GGATGGCCGT | TCCCTGTCCG  | AGGCCCGGAG  | GTCCGGAGGA CTTGAATCTT 5881  |               |
| Estrildidae                 | ----       | ----       | ----       | ----        | ----        | -                           |               |
| Xenopus_Silurana_tropicalis | ----       | ----       | ----       | ----        | ----        | -                           |               |
| LTR_XT                      | AATATACTAG | GAAGTNNCGN | TACATANAAA | CNATAAGTAT  | CAGAAATGCNA | TTAGTNNCTTN AGAAAAATAC 6268 |               |
| Takifugu_rubripes           | ----       | ----       | ----       | ----        | ----        | -                           |               |
| Bos_taurus                  | ----       | ----       | ----       | ----        | ----        | -                           |               |
| Homo_sapiens                | ----       | ----       | ----       | ----        | ----        | -                           |               |
| Microcebus_murinus          | ----       | ----       | ----       | ----        | ----        | -                           |               |
| Myotis_lucifugus            | ----       | ----       | ----       | ----        | ----        | -                           |               |
| Equus_caballus              | ----       | ----       | ----       | ----        | ----        | -                           |               |
| Tupaia_belangeri            | ----       | ----       | ----       | ----        | ----        | -                           |               |
| Loxodonta_africana          | ----       | ----       | ----       | ----        | ----        | -                           |               |
| Murinae                     | ----       | ----       | ----       | ----        | ----        | -                           |               |
| Canis_lupus_familiaris      | ----       | ----       | ----       | ----        | ----        | -                           |               |
| Sus_scrofa                  | ----       | ----       | ----       | ----        | ----        | -                           |               |
| Choloepus_hoffmanni         | ----       | ----       | ----       | ----        | ----        | -                           |               |
| Vicugna_pacos               | ----       | ----       | ----       | ----        | ----        | -                           |               |
| Gavialis_gangeticus         | ----       | ----       | ----       | ----        | ----        | -                           |               |
| Mammalia                    | ----       | ----       | ----       | ----        | ----        | -                           |               |
| Passeroidea                 | ----       | ----       | ----       | ----        | ----        | -                           |               |
| Takifugu                    | ----       | ----       | ----       | ----        | ----        | -                           |               |
| Pteropus_vampyrus           | ----       | ----       | ----       | ----        | ----        | -                           |               |
| Ornithorhynchus             | TTATCATTTG | ACCTTCTCT  | TTGAACCAA  | CTAATTAATG  | TAAATGTTCC  | AACTTTATAA CCTTGAAGT 887    |               |
| Oryctolagus_cuniculus       | ----       | ----       | ----       | ----        | ----        | -                           |               |
| Gallus_gallus               | ----       | ----       | ----       | ----        | ----        | -                           |               |
| Hominidae                   | NNNANNNCN  | NTNANNNCTN | NGNNANNNNN | GNGTNTNNA   | TNNCCNNTCN  | NANNNTNCAG CTCTGNNCCN 3055  |               |
| Metatheria                  | ----       | ----       | ----       | ----        | ----        | -                           |               |
| Rodentia                    | ACCCACTGAA | TGGCTTGGTC | TCAGTCTCC  | CTGAGTCTG   | GGGACGCCN   | TGACTNCAGG CTGCAGTG-A 674   |               |
| Monodelphis                 | ----       | ----       | ----       | ----        | ----        | -                           |               |
| Consensus                   | ----       | ----       | ----       | ----        | ----        | -                           |               |
| Conservation                | 100%       | 0%         | 100%       | 0%          | 100%        | 0%                          |               |

|                             | 6,800        | 6,820      | 6,840        | 6,860      |            |               |            |      |
|-----------------------------|--------------|------------|--------------|------------|------------|---------------|------------|------|
| Dipodomys_ordii             | -----        | -----      | -----        | -----      | -          |               |            |      |
| Laurasiatheria              | -----        | -----      | -----        | -----      | -          |               |            |      |
| Eutheria                    | -----        | -----      | -----        | -----      | -          |               |            |      |
| Tarsius_syrichta            | -----        | -----      | -----        | -----      | -          |               |            |      |
| Muridae                     | TTGCTGGAGG   | TAGCTCAAAG | GGTGTTTAAC   | AACAGAGAAC | TGATTGGGAC | AAGACCTTTT    | GCATAAACTG | 1198 |
| Gasterosteus_aculeatus      | GCTTGAGAGA   | AGGAGTTTTT | TGCGCAAGAC   | AAGACTAAGA | GAACATTAAC | TGTAGAATAC    | ACATTCCAAT | 855  |
| Felis_silvestris            | -----        | -----      | -----        | -----      | -----      | -----         | -----      | -    |
| Rattus                      | -----        | -----      | -----        | -----      | -----      | -----         | -----      | -    |
| Papio_hamadryas             | TAATAGCACT   | AACCAAGGCC | CTAGAGCTGT   | CCAAGGGAAA | GAAAGCTAAC | ATTTATACTG    | ATAGCCGATA | 4157 |
| Pan_troglodytes             | TNATAGCGCT   | CACCAAGGCT | CTA - ACNTAG | GCGGGGAAAA | AGAATATAAC | A - - - - - G | ACAGCGTATG | 2223 |
| Ailuropoda_melanoleuca      | -----        | -----      | -----        | -----      | -----      | -----         | -----      | -    |
| Cavia_porcellus             | -----        | -----      | -----        | -----      | -----      | -----         | -----      | -    |
| Ictidomys_tridecemlineatus  | -----        | -----      | -----        | -----      | -----      | -----         | -----      | -    |
| Canis                       | -----        | -----      | -----        | -----      | -----      | -----         | -----      | -    |
| Felis_catus                 | -----        | -----      | -----        | -----      | -----      | -----         | -----      | -    |
| Ochotona_princeps           | -----        | -----      | -----        | -----      | -----      | -----         | -----      | -    |
| Cercopithecidae             | CAGCTTGCGG   | TGGCCAATTA | ATATCAGGAA   | CCGCTTAGTG | AGTGTACCCT | GACCGCCGAC    | TGGTTTCACG | 329  |
| Carnivora                   | -----        | -----      | -----        | -----      | -----      | -----         | -----      | -    |
| Mus                         | CCGAATTGAC   | TATGCCACC  | CCTTCCACCA   | CCCAGACCCC | CCCCGCGGGG | CCCCCGGAG     | CTCGATCAGC | 383  |
| Mus_musculus                | -----        | -----      | -----        | -----      | -----      | -----         | -----      | -    |
| Rattus_norvegicus           | -----        | -----      | -----        | -----      | -----      | -----         | -----      | -    |
| Tursiops_truncatus          | -----        | -----      | -----        | -----      | -----      | -----         | -----      | -    |
| Procapra_capensis           | -----        | -----      | -----        | -----      | -----      | -----         | -----      | -    |
| Primates                    | -----        | -----      | -----        | -----      | -----      | -----         | -----      | -    |
| Echinops_telfairi           | -----        | -----      | -----        | -----      | -----      | -----         | -----      | -    |
| Sorex_araneus               | -----        | -----      | -----        | -----      | -----      | -----         | -----      | -    |
| Canidae                     | -----        | -----      | -----        | -----      | -----      | -----         | -----      | -    |
| Otolemur_garnettii          | -----        | -----      | -----        | -----      | -----      | -----         | -----      | -    |
| Gallus                      | -----        | -----      | -----        | -----      | -----      | -----         | -----      | -    |
| Callithrix_jacchus          | -----        | -----      | -----        | -----      | -----      | -----         | -----      | -    |
| Crocodylus_porosus          | -----        | -----      | -----        | -----      | -----      | -----         | -----      | -    |
| Erinaceus_europaeus         | -----        | -----      | -----        | -----      | -----      | -----         | -----      | -    |
| rnd-6_family-7426-LTR-ERV1  | -----        | -----      | -----        | -----      | -----      | -----         | -----      | -    |
| Esox_lucius                 | -----        | -----      | -----        | -----      | -----      | -----         | -----      | -    |
| Salmo_salar                 | -----        | -----      | -----        | -----      | -----      | -----         | -----      | -    |
| Didelphidae                 | -----        | -----      | -----        | -----      | -----      | -----         | -----      | -    |
| Latimeria_chalumnae         | CTTGTTTATA   | TATCACAGGC | GGTGAGCAGC   | CTTTCTGTCT | GTCAATGGAA | CACTCTATCG    | GTCACGGGAG | 405  |
| Monodelphis_domestica       | -----        | -----      | -----        | -----      | -----      | -----         | -----      | -    |
| Macropus_eugenii            | -----        | -----      | -----        | -----      | -----      | -----         | -----      | -    |
| Alligator_mississippiensis  | -----        | -----      | -----        | -----      | -----      | -----         | -----      | -    |
| Chrysemys_picta_belli       | GGCGTGCGCC   | GCCTGTTTG  | ACGAACTCTG   | GCTTGTTTTC | CCAGTAGCCT | GCTACTAAGG    | GCCCCAGCTC | 1646 |
| Danio_rerio                 | -----        | -----      | -----        | -----      | -----      | -----         | -----      | -    |
| Taeniopygia                 | -----        | -----      | -----        | -----      | -----      | -----         | -----      | -    |
| Dasybus_novemcinctus        | -----        | -----      | -----        | -----      | -----      | -----         | -----      | -    |
| LTR_XT                      | -----        | -----      | -----        | -----      | -----      | -----         | -----      | -    |
| Haplorrhini                 | AAACTTATTA   | TGAGTGTACA | GG - AACTCCC | CTGGGGACAT | GTGTTTATAA | TCAAACCAGC    | TACTCCGTCT | 6780 |
| Catarrhini                  | - - AGTTACTA | TGAATGCCTA | GG - AACTTTA | AAAGGAACAT | GTTTATATAA | TGACACTCAG    | TACAAGGTAT | 5980 |
| Anolis_carolinensis         | -----        | -----      | -----        | -----      | -----      | -----         | -----      | 1184 |
| Murine_leukemia_virus       | GCTACTGCGG   | CAAATGGGGA | TGTGAGACCA   | CTGGACAGGC | ATACTGGAAG | CCATCATCAT    | CATGGGACCT | 6098 |
| Phascolarctos_cinereus      | TGTACTGTAA   | AGAGTGGGCT | TGTGAGACCG   | CGGGAACCGC | CTACTGGCAA | CCCCGGTCCT    | CGTGGGACCT | 5951 |
| Estrildidae                 | -----        | -----      | -----        | -----      | -----      | -----         | -----      | -    |
| Xenopus_Silurana_tropicalis | -----        | -----      | -----        | -----      | -----      | -----         | -----      | -    |
| L_XT                        | TTGGAAAGTA   | CAGGATTACT | AGATANNCCG   | ACTATATGTG | TNNNACNNNN | GTNNCTAAA     | TCANACNATT | 6338 |
| Takifugu_rubripes           | -----        | -----      | -----        | -----      | -----      | -----         | -----      | -    |
| Bos_taurus                  | -----        | -----      | -----        | -----      | -----      | -----         | -----      | -    |
| Homo_sapiens                | -----        | -----      | -----        | -----      | -----      | -----         | -----      | -    |
| Microcebus_murinus          | -----        | -----      | -----        | -----      | -----      | -----         | -----      | -    |
| Myotis_lucifugus            | -----        | -----      | -----        | -----      | -----      | -----         | -----      | -    |
| Equus_caballus              | -----        | -----      | -----        | -----      | -----      | -----         | -----      | -    |
| Tupaia_belangeri            | -----        | -----      | -----        | -----      | -----      | -----         | -----      | -    |
| Loxodonta_africana          | -----        | -----      | -----        | -----      | -----      | -----         | -----      | -    |
| Murinae                     | -----        | -----      | -----        | -----      | -----      | -----         | -----      | -    |
| Canis_lupus_familiaris      | -----        | -----      | -----        | -----      | -----      | -----         | -----      | -    |
| Sus_scrofa                  | -----        | -----      | -----        | -----      | -----      | -----         | -----      | -    |
| Choloepus_hoffmanni         | -----        | -----      | -----        | -----      | -----      | -----         | -----      | -    |
| Vicugna_pacos               | -----        | -----      | -----        | -----      | -----      | -----         | -----      | -    |
| Gavialis_gangeticus         | -----        | -----      | -----        | -----      | -----      | -----         | -----      | -    |
| Mammalia                    | -----        | -----      | -----        | -----      | -----      | -----         | -----      | -    |
| Passeroidea                 | -----        | -----      | -----        | -----      | -----      | -----         | -----      | -    |
| Takifugu                    | -----        | -----      | -----        | -----      | -----      | -----         | -----      | -    |
| Pteropus_vampyrus           | -----        | -----      | -----        | -----      | -----      | -----         | -----      | -    |
| Ornithorhynchus             | ACAGAGTTGA   | TGAAATTGT  | ATACTTTTTT   | AAATCAGTTT | CTTCAAGTTT | TGATAGCAA     | AATTTCACTT | 957  |
| Oryctolagus_cuniculus       | -----        | -----      | -----        | -----      | -----      | -----         | -----      | -    |
| Gallus_gallus               | -----        | -----      | -----        | -----      | -----      | -----         | -----      | -    |
| Hominidae                   | CGNNNNNNNN   | NTGACCNNG  | NANNNCNCTN   | ACNGCNNNCN | CNNANANCNN | NNCCANANAN    | NGANNNNGNC | 3125 |
| Metatheria                  | -----        | -----      | -----        | -----      | -----      | -----         | -----      | -    |
| Rodentia                    | CATTCTNCTT   | CCCCTCTCTC | ATCCATGGGA   | ACGGTGTCTT | CCGTACCCTC | TCATTCCCCC    | TTGGGATGCC | 744  |
| Monodelphis                 | -----        | -----      | -----        | -----      | -----      | -----         | -----      | -    |
| Consensus                   | -----        | -----      | -----        | -----      | -----      | -----         | -----      | -    |
| Conservation                | 100%         |            |              |            |            |               |            | 0%   |

|                             | 6,880      | 6,900       | 6,920      |            |            |            |            |      |
|-----------------------------|------------|-------------|------------|------------|------------|------------|------------|------|
| Dipodomys_ordii             | ----       | ----        | ----       | -          |            |            |            |      |
| Laurasiatheria              | ----       | ----        | ----       | -          |            |            |            |      |
| Eutheria                    | ----       | ----        | ----       | -          |            |            |            |      |
| Tarsius_syrichtha           | ----       | ----        | ----       | -          |            |            |            |      |
| Muridae                     | AAAGCCACTG | TACCTTCTC   | TGATGATGAG | ACA-CAGTTA | GACTTACAGA | TANCCAGCAA | AATTTTGGTG | 1267 |
| Gasterosteus_aculeatus      | GCCAAGATCT | AGGGTACTGA  | TGCTAGTGGG | TCAACAGTTA | CAAACAAAAT | ATGTACGCGG | ACCAACTACC | 925  |
| Felis_silvestris            | ----       | ----        | ----       | -          |            |            |            |      |
| Rattus                      | ----       | ----        | ----       | -          |            |            |            |      |
| Papio_hamadryas             | TGCCTTTGCA | ACGGCTCATA  | CTCATGGAAG | TATCTATGAA | AGAAGAGGTC | TCCTAACCTC | AGAAGGAAAG | 4227 |
| Pan_troglodytes             | ---CTTTGCA | ACGCCAAAACA | T----GGGG  | CATTTACAGG | CGAGG----  | TACTGACCT- | -GAAGGAAAA | 2278 |
| Ailuropoda_melanoleuca      | ----       | ----        | ----       | -          |            |            |            |      |
| Cavia_porcellus             | ----       | ----        | ----       | -          |            |            |            |      |
| Ictidomys_tridecemlineatus  | ----       | ----        | ----       | -          |            |            |            |      |
| Canis                       | ----       | ----        | ----       | -          |            |            |            |      |
| Felis_catus                 | ----       | ----        | ----       | -          |            |            |            |      |
| Ochotona_princeps           | ----       | ----        | ----       | -          |            |            |            |      |
| Cercopithecidae             | CGAATAAATA | AGAGTCAGGA  | TTGCGTTAAA | AGACCGAGAA | AGCAACTGCA | GCGGGAAGTC | TCTGAGGCAT | 399  |
| Carnivora                   | ----       | ----        | ----       | -          |            |            |            |      |
| Mus                         | TTCTGCGCGG | ACTCCTCAGT  | ATGGCCTTTT | CTGATTAATG | AACATCACCC | TTTTCAAAC  | CCGTACGGTT | 453  |
| Mus_musculus                | ----       | ----        | ----       | -          |            |            |            |      |
| Rattus_norvegicus           | ----       | ----        | ----       | -          |            |            |            |      |
| Tursiops_truncatus          | ----       | ----        | ----       | -          |            |            |            |      |
| Procavia_capensis           | ----       | ----        | ----       | -          |            |            |            |      |
| Primates                    | ----       | ----        | ----       | -          |            |            |            |      |
| Echinops_telfairi           | ----       | ----        | ----       | -          |            |            |            |      |
| Sorex_araneus               | ----       | ----        | ----       | -          |            |            |            |      |
| Canidae                     | ----       | ----        | ----       | -          |            |            |            |      |
| Otomur_garnettii            | ----       | ----        | ----       | -          |            |            |            |      |
| Gallus                      | ----       | ----        | ----       | -          |            |            |            |      |
| Callithrix_jacchus          | ----       | ----        | ----       | -          |            |            |            |      |
| Crocodylus_porosus          | ----       | ----        | ----       | -          |            |            |            |      |
| Erinaceus_europaeus         | ----       | ----        | ----       | -          |            |            |            |      |
| rnd-6_family-7426-LTR-ERV1  | ----       | ----        | ----       | -          |            |            |            |      |
| Esox_lucius                 | ----       | ----        | ----       | -          |            |            |            |      |
| Salmo_salar                 | ----       | ----        | ----       | -          |            |            |            |      |
| Didelphidae                 | ----       | ----        | ----       | -          |            |            |            |      |
| Latimeria_chalumnae         | CGTGTITTTA | TATCCCGTGC  | CTCATTTGAA | GAAAAITTTT | AACTCGTGT  | CACCCCATCC | TAATTAFTTT | 475  |
| Monodelphis_domestica       | ----       | ----        | ----       | -          |            |            |            |      |
| Macropus_eugenii            | ----       | ----        | ----       | -          |            |            |            |      |
| Alligator_mississippiensis  | ----       | ----        | ----       | -          |            |            |            |      |
| Chrysemys_picta_belli       | GTCGTAAGAC | TTTCTATTAC  | CTATGCCCT  | AACCGACCT  | GCTCCGCAGA | AGAACAGACT | GTTGGTATAT | 1716 |
| Danio_rerio                 | ----       | ----        | ----       | -          |            |            |            |      |
| Taeniopygia                 | ----       | ----        | ----       | -          |            |            |            |      |
| Dasybus_novemcinctus        | ----       | ----        | ----       | -          |            |            |            |      |
| LTR_XT                      | ----       | ----        | ----       | -          |            |            |            |      |
| Haplorrhini                 | GTGACCCGGG | AAATGGGCAA  | CCTC--AAGT | ATGTTATGAT | CC---AGGC  | CTCCTAC-CC | TACGACTTCT | 6843 |
| Catarrhini                  | GTAGCCCAGG | AAAGCAGNGA  | CCAG--ATGT | GTGTTATGAC | CCCTCTGAGC | CTCCCATGTC | CACAGTTTTT | 6048 |
| Anolis_carolinensis         | ----       | ----        | ----       | -          |            |            |            |      |
| Murine_leukemia_virus       | AATTTCCCTT | AAGCGAGGAA  | ACACTCCTAA | GGATCAGGGC | CCCTGTTATG | ATTCTCTGGT | CTCCAGTGGC | 6168 |
| Phascolarctos_cinereus      | TAT-----   | AA-----     | -----CTGT  | AGGCCAGGGT | CAC-----   | -----C     | CTACAGGGAC | 5984 |
| Estrildidae                 | ----       | ----        | ----       | -          |            |            |            |      |
| Xenopus_Silurana_tropicalis | GTNANGACAG | ATTCNGTANT  | ATNNCNANCT | ANNATNCATC | TNCGAGACAC | AACGATTGTT | AAAANGTAAA | 6408 |
| L_XT                        | ----       | ----        | ----       | -          |            |            |            |      |
| Takifugu_rubripes           | ----       | ----        | ----       | -          |            |            |            |      |
| Bos_taurus                  | ----       | ----        | ----       | -          |            |            |            |      |
| Homo_sapiens                | ----       | ----        | ----       | -          |            |            |            |      |
| Microcebus_murinus          | ----       | ----        | ----       | -          |            |            |            |      |
| Myotis_lucifugus            | ----       | ----        | ----       | -          |            |            |            |      |
| Equus_caballus              | ----       | ----        | ----       | -          |            |            |            |      |
| Tupaia_belangeri            | ----       | ----        | ----       | -          |            |            |            |      |
| Loxodonta_africana          | ----       | ----        | ----       | -          |            |            |            |      |
| Murinae                     | ----       | ----        | ----       | -          |            |            |            |      |
| Canis_lupus_familiaris      | ----       | ----        | ----       | -          |            |            |            |      |
| Sus_scrofa                  | ----       | ----        | ----       | -          |            |            |            |      |
| Choloepus_hoffmanni         | ----       | ----        | ----       | -          |            |            |            |      |
| Vicugna_pacos               | ----       | ----        | ----       | -          |            |            |            |      |
| Gavialis_gangeticus         | ----       | ----        | ----       | -          |            |            |            |      |
| Mammalia                    | ----       | ----        | ----       | -          |            |            |            |      |
| Passeroidea                 | ----       | ----        | ----       | -          |            |            |            |      |
| Takifugu                    | ----       | ----        | ----       | -          |            |            |            |      |
| Pteropus_vampyrus           | ----       | ----        | ----       | -          |            |            |            |      |
| Ornithorhynchus             | CCTGAGCTTT | GACAAGCCTG  | TTTATTCAGG | AAGTTGGGTA | CTGTCTTTAG | TGGAATATTC | ACAAGGCTGC | 1027 |
| Oryctolagus_cuniculus       | ----       | ----        | ----       | -          |            |            |            |      |
| Gallus_gallus               | ----       | ----        | ----       | -          |            |            |            |      |
| Hominiidae                  | TCAITNNNGN | CNCCNANTT   | CCCNANNNCG | CNNANAANAN | CCNCTCCTTC | GTAGGGCTAG | TAGGGTNCNT | 3195 |
| Metatheria                  | ----       | ----        | ----       | -          |            |            |            |      |
| Rodentia                    | TCTTAGAAAA | CCTCCAGCCT  | CTCCACCTGG | CACCCGACCT | GAAGGGCCCT | AAATTTATTC | ACTTTTGCAA | 814  |
| Monodelphis                 | ----       | ----        | ----       | -          |            |            |            |      |
| Consensus                   | ----       | ----        | ----       | -          |            |            |            |      |
| Conservation                | 100%       | 0%          |            |            |            |            |            |      |

|                             | 6,940       | 6,960      | 6,980      | 7,000       |            |            |            |      |
|-----------------------------|-------------|------------|------------|-------------|------------|------------|------------|------|
| Dipodomys_ordii             | -----       | -----      | -----      | -----       | -          |            |            |      |
| Laurasiatheria              | -----       | -----      | -----      | -----       | -          |            |            |      |
| Eutheria                    | -----       | -----      | -----      | -----       | -          |            |            |      |
| Tarsius_syrichta            | -----       | -----      | -----      | -----       | -          |            |            |      |
| Muridae                     | TCTCACCCCTC | TGTCAGAAGA | AACNAACAAT | CGAGCCCCCA  | GGACTGGCCC | AACACCAAGC | TCCTATAATT | 1337 |
| Gasterosteus_aculeatus      | AGAGCCTACA  | TGCAGGCTAC | CCCCCATAAT | TTGGAAATGA  | GATGATATAA | AGCGAGGTGC | CAATTGGCCC | 995  |
| Felis_silvestris            | -----       | -----      | -----      | -----       | -----      | -----      | -----      | -    |
| Rattus                      | -----       | -----      | -----      | -----       | -----      | -----      | -----      | -    |
| Papio_hamadryas             | GAAATCAAGA  | ACAAAGCTGA | AATAATTGCC | TTATTTAAAGG | CCCTTTTTCT | TCCTCAAGAA | GTGGCTATAA | 4297 |
| Pan_troglodytes             | GAA--TAAAA  | ACAAGG---- | ---AATCCTA | GCCCTTAAAG  | CCCTTG---- | ----CAGAAA | ATGCC---AT | 2328 |
| Ailuropoda_melanoleuca      | -----       | -----      | -----      | -----       | -----      | -----      | -----      | -    |
| Cavia_porcellus             | -----       | -----      | -----      | -----       | -----      | -----      | -----      | -    |
| Ictidomys_tridecemlineatus  | -----       | -----      | -----      | -----       | -----      | -----      | -----      | -    |
| Canis                       | -----       | -----      | -----      | -----       | -----      | -----      | -----      | -    |
| Felis_catus                 | -----       | -----      | -----      | -----       | -----      | -----      | -----      | -    |
| Ochotona_princeps           | -----       | -----      | -----      | -----       | -----      | -----      | -----      | -    |
| Cercopithecidae             | GGGATGCCCA  | ACCCCTGAGA | TGGCGTCGCC | CCCCGACCGG  | TATGTGGGGC | TTCTTGAACG | GGCTCGTTGG | 469  |
| Carnivora                   | -----       | -----      | -----      | -----       | -----      | -----      | -----      | -    |
| Mus                         | GATTATGTTC  | ACCACCACTG | GGATGATGCA | GCACTTTCAG  | CTTAAGTGG  | AGAGGAAGGA | TCTTGAGCGA | 523  |
| Mus_musculus                | -----       | -----      | -----      | -----       | -----      | -----      | -----      | -    |
| Rattus_norvegicus           | -----       | -----      | -----      | -----       | -----      | -----      | -----      | -    |
| Tursiops_truncatus          | -----       | -----      | -----      | -----       | -----      | -----      | -----      | -    |
| Procapra_capensis           | -----       | -----      | -----      | -----       | -----      | -----      | -----      | -    |
| Primates                    | -----       | -----      | -----      | -----       | -----      | -----      | -----      | -    |
| Echinops_telfairi           | -----       | -----      | -----      | -----       | -----      | -----      | -----      | -    |
| Sorex_araneus               | -----       | -----      | -----      | -----       | -----      | -----      | -----      | -    |
| Canidae                     | -----       | -----      | -----      | -----       | -----      | -----      | -----      | -    |
| Otolemur_garnettii          | -----       | -----      | -----      | -----       | -----      | -----      | -----      | -    |
| Gallus                      | -----       | -----      | -----      | -----       | -----      | -----      | -----      | -    |
| Callithrix_jacchus          | -----       | -----      | -----      | -----       | -----      | -----      | -----      | -    |
| Crocodylus_porosus          | -----       | -----      | -----      | -----       | -----      | -----      | -----      | -    |
| Erinaceus_europaeus         | -----       | -----      | -----      | -----       | -----      | -----      | -----      | -    |
| rnd-6_family-7426-LTR-ERV1  | TGCTAAACGC  | TTAATCGGGA | GGAGGTTTAN | TGATCNCNTCT | GTACAGAGTG | ATATGAAGTT | ATGGCCGTTT | 71   |
| Esox_lucius                 | -----       | -----      | -----      | -----       | -----      | -----      | -----      | -    |
| Salmo_salar                 | -----       | -----      | -----      | -----       | -----      | -----      | -----      | -    |
| Didelphidae                 | -----       | -----      | -----      | -----       | -----      | -----      | -----      | -    |
| Latimeria_chalumnae         | TTTAAACGTTG | TGCTTTCTAA | CATCGTCCAA | TGTTTCAAAG  | GCATTTGCTC | CCTTGCTCCG | ACGAAGCCTG | 545  |
| Monodelphis_domestica       | -----       | -----      | -----      | -----       | -----      | -----      | -----      | -    |
| Macropus_eugenii            | -----       | -----      | -----      | -----       | -----      | -----      | -----      | -    |
| Alligator_mississippiensis  | -----       | -----      | -----      | -----       | -----      | -----      | -----      | -    |
| Chrysemys_picta_belli       | GCCCTCCCGC  | CGATTAGATC | CCTCCCAATC | TGACTGTGTT  | ACGATGGTTA | GGCAAGGCGG | TATGCTGTGT | 1786 |
| Danio_rerio                 | -----       | -----      | -----      | -----       | -----      | -----      | -----      | -    |
| Taeniopygia                 | -----       | -----      | -----      | -----       | -----      | -----      | -----      | -    |
| Dasybus_novemcinctus        | -----       | -----      | -----      | -----       | -----      | -----      | -----      | -    |
| LTR_XT                      | -----       | -----      | -----      | -----       | -----      | -----      | -----      | -    |
| Haplorrhini                 | GGTTTGAAT   | TCAAATAGGG | AAACCTTTGT | TACCCTCATA  | TGCC-AATCC | TAAAGACGTT | GGAAGTGGGA | 6912 |
| Catarrhini                  | GAAATAAGAT  | TAAGGACTGA | AGACTGGTGG | GGAC-TCATA  | AAT--GATAC | AAGTAAAGTA | TTAGCCAGAA | 6115 |
| Anolis_carolinensis         | -----       | -----      | -----      | -----       | -----      | -----      | -----      | 1184 |
| Murine_leukemia_virus       | GTCCAGGGTG  | CCACACCGGG | GGGTGGATGC | AACCCCTAG   | TCTTAGAAT  | CACTGACGGG | GGTAAAAAGG | 6238 |
| Phascolarctos_cinereus      | ATGCGAG---  | -CGCACCGG- | ---TTGGTGC | AACCCACTCA  | AGATAGAGTT | CACCGAGCCT | GGCAACCGGT | 6046 |
| Estrildidae                 | -----       | -----      | -----      | -----       | -----      | -----      | -----      | -    |
| Xenopus_Silurana_tropicalis | -----       | -----      | -----      | -----       | -----      | -----      | -----      | -    |
| L_XT                        | TACTGTGAAA  | NTNTACATAG | CTTGATATGG | AATGAAAAGT  | GATNTGNTCC | ACGGTAATTN | AAATGANTNC | 6478 |
| Takifugu_rubripes           | -----       | -----      | -----      | -----       | -----      | -----      | -----      | -    |
| Bos_taurus                  | -----       | -----      | -----      | -----       | -----      | -----      | -----      | -    |
| Homo_sapiens                | -----       | -----      | -----      | -----       | -----      | -----      | -----      | -    |
| Microcebus_murinus          | -----       | -----      | -----      | -----       | -----      | -----      | -----      | -    |
| Myotis_lucifugus            | -----       | -----      | -----      | -----       | -----      | -----      | -----      | -    |
| Equus_caballus              | -----       | -----      | -----      | -----       | -----      | -----      | -----      | -    |
| Tupaia_belangeri            | -----       | -----      | -----      | -----       | -----      | -----      | -----      | -    |
| Loxodonta_africana          | -----       | -----      | -----      | -----       | -----      | -----      | -----      | -    |
| Murinae                     | -----       | -----      | -----      | -----       | -----      | -----      | -----      | -    |
| Canis_lupus_familiaris      | -----       | -----      | -----      | -----       | -----      | -----      | -----      | -    |
| Sus_scrofa                  | -----       | -----      | -----      | -----       | -----      | -----      | -----      | -    |
| Choloepus_hoffmanni         | -----       | -----      | -----      | -----       | -----      | -----      | -----      | -    |
| Vicugna_pacos               | -----       | -----      | -----      | -----       | -----      | -----      | -----      | -    |
| Gavialis_gangeticus         | -----       | -----      | -----      | -----       | -----      | -----      | -----      | -    |
| Mammalia                    | -----       | -----      | -----      | -----       | -----      | -----      | -----      | -    |
| Passeroidea                 | -----       | -----      | -----      | -----       | -----      | -----      | -----      | -    |
| Takifugu                    | -----       | -----      | -----      | -----       | -----      | -----      | -----      | -    |
| Pteropus_vampyrus           | -----       | -----      | -----      | -----       | -----      | -----      | -----      | -    |
| Ornithorhynchus             | ATTTGCATTA  | AGCATACTGT | AAGTTTGAAG | TGCTCTCCAC  | AGAGCGTTTA | GTTTAAACAA | AGTTCATGTG | 1097 |
| Oryctolagus_cuniculus       | -----       | -----      | -----      | -----       | -----      | -----      | -----      | -    |
| Gallus_gallus               | -----       | -----      | -----      | -----       | -----      | -----      | -----      | -    |
| Hominidae                   | CCNGCNCNNN  | NTCCCAANN  | TNNNGTCTN  | NNCNAAGNN   | NNNNACNANN | CGCGANNNA  | ANNNNCNCN  | 3265 |
| Metatheria                  | -----       | -----      | -----      | -----       | -----      | -----      | -----      | -    |
| Rodentia                    | TCAA-ATTTG  | GCCTCAATAT | CCCTTAGATA | ATCAATCCAA  | ATGGCCGCT  | AATGGCACCC | TAGATCCCAA | 883  |
| Monodelphis                 | -----       | -----      | -----      | -----       | -----      | -----      | -----      | -    |
| Consensus                   | -----       | -----      | -----      | -----       | -----      | -----      | -----      | -    |
| Conservation                |             |            |            |             |            |            |            |      |



|                             | 7,020      | 7,040       | 7,060      |             |            |            |            |      |
|-----------------------------|------------|-------------|------------|-------------|------------|------------|------------|------|
| Dipodomys_ordii             | -----      | -----       | -----      | -           |            |            |            |      |
| Laurasiatheria              | -----      | -----       | -----      | -           |            |            |            |      |
| Eutheria                    | -----      | -----       | -----      | -           |            |            |            |      |
| Tarsius_syrichtha           | -----      | -----       | -----      | -           |            |            |            |      |
| Muridae                     | GTTCAACTAA | CCAGTTTCAGC | TACCTCCATC | CAGATTTAAAC | AATACCCAAT | GACCCTGGAA | ACAAAAGNGG | 1407 |
| Gasterosteus_aculeatus      | TCCACCCGTA | TACAACCTGC  | AAGCAGCCAT | GACAGGGGAA  | ACCCCACGTT | TCAAATGTGA | GATGCGCAAA | 1065 |
| Felis_silvestris            | -----      | -----       | -----      | -----       | -----      | -----      | -----      | -    |
| Rattus                      | -----      | -----       | -----      | -----       | -----      | -----      | -----      | -    |
| Papio_hamadryas             | TTCACTGCCC | CGGGCATCAG  | AAAGGACAGG | ATCCAGTCGC  | AGTAGGAAAC | AGACAGGCTG | ACCGAGTGCC | 4367 |
| Pan_troglodytes             | GTCATTGCCC | -GGGCATCAA  | AATA-----  | -----TCCA   | TGCCAGGAAC | TCGCGACCAA | CGCAAGAAGT | 2385 |
| Ailuropoda_melanoleuca      | -----      | -----       | -----      | -----       | -----      | -----      | -----      | -    |
| Cavia_porcellus             | -----      | -----       | -----      | -----       | -----      | -----      | -----      | -    |
| Ictidomys_tridecemlineatus  | -----      | -----       | -----      | -----       | -----      | -----      | -----      | -    |
| Canis                       | -----      | -----       | -----      | -----       | -----      | -----      | -----      | -    |
| Felis_catus                 | -----      | -----       | -----      | -----       | -----      | -----      | -----      | -    |
| Ochotona_princeps           | -----      | -----       | -----      | -----       | -----      | -----      | -----      | -    |
| Cercopithecidae             | CTCGGAGAGC | ACCTGTCCA   | TCTTTTTCCG | CCCCCTTAGG  | GGATCTCAAT | GGGCTCATTG | CCCTCTCTGA | 539  |
| Carnivora                   | -----      | -----       | -----      | -----       | -----      | -----      | -----      | -    |
| Mus                         | AAAAGTCCGT | GGCCACCATA  | ATGGTTCCTC | CGCTGATAAT  | ACAGTAGGGA | CGCTTAGGGC | TGTGGCGGTG | 593  |
| Mus_musculus                | -----      | -----       | -----      | -----       | -----      | -----      | -----      | -    |
| Rattus_norvegicus           | -----      | -----       | -----      | -----       | -----      | -----      | -----      | -    |
| Tursiops_truncatus          | -----      | -----       | -----      | -----       | -----      | -----      | -----      | -    |
| Procavia_capensis           | -----      | -----       | -----      | -----       | -----      | -----      | -----      | -    |
| Primates                    | -----      | -----       | -----      | -----       | -----      | -----      | -----      | -    |
| Echinops_telfairi           | -----      | -----       | -----      | -----       | -----      | -----      | -----      | -    |
| Sorex_araneus               | -----      | -----       | -----      | -----       | -----      | -----      | -----      | -    |
| Canidae                     | -----      | -----       | -----      | -----       | -----      | -----      | -----      | -    |
| Otolemur_garnettii          | -----      | -----       | -----      | -----       | -----      | -----      | -----      | -    |
| Gallus                      | -----      | -----       | -----      | -----       | -----      | -----      | -----      | -    |
| Callithrix_jacchus          | -----      | -----       | -----      | -----       | -----      | -----      | -----      | -    |
| Crocodylus_porosus          | -----      | -----       | -----      | -----       | -----      | -----      | -----      | -    |
| Erinaceus_europaeus         | -----      | -----       | -----      | -----       | -----      | -----      | -----      | -    |
| rnd-6_family-7426-LTR-ERV1  | AAGGTTATTC | CCGGNCCTGG  | TGACAAGCCN | ACGATTGTTG  | TCAACTCAA  | GGGTGAGGAG | AAGCAGTTTT | 141  |
| Esox_lucius                 | -----      | -----       | -----      | -----       | -----      | -----      | -----      | -    |
| Salmo_salar                 | -----      | -----       | -----      | -----       | -----      | -----      | -----      | -    |
| Didelphidae                 | -----      | -----       | -----      | -----       | -----      | -----      | -----      | -    |
| Latimeria_chalumnae         | AAGGTTAGCA | AAACATTTCA  | GGCGATTGGA | GCTTTGTGCG  | CTCAACAGGC | CGGTGGGGCC | AAGATCGTTT | 615  |
| Monodelphis_domestica       | -----      | -----       | -----      | -----       | -----      | -----      | -----      | -    |
| Macropus_eugenii            | -----      | -----       | -----      | -----       | -----      | -----      | -----      | -    |
| Alligator_mississippiensis  | -----      | -----       | -----      | -----       | -----      | -----      | -----      | -    |
| Chrysemys_picta_belli       | CCTCCTGAAC | TGAAGCTGTT  | TACCTCTGGA | CTCGCCATGC  | GAATTGCCTA | CCGTGCCTGG | CAGAAGTTAA | 1856 |
| Danio_rerio                 | -----      | -----       | -----      | -----       | -----      | -----      | -----      | -    |
| Taeniopygia                 | -----      | -----       | -----      | -----       | -----      | -----      | -----      | -    |
| Dasybus_novemcinctus        | -----      | -----       | -----      | -----       | -----      | -----      | -----      | -    |
| LTR_XT                      | -----      | -----       | -----      | -----       | -----      | -----      | -----      | -    |
| Haplorrhini                 | AACTCGTAAG | CAAAACACAG  | GTATTCCCTT | ATTACATAAA  | AGGATCTGTT | TCTATATATT | TTGATGCCTG | 6982 |
| Catarrhini                  | ---CAGAAG  | AAAA---AG   | GGGTGCCCAA | ACGCATA---  | ---ATCT--- | ---TGAAT   | TTGATGCCTG | 6164 |
| Anolis_carolinensis         | -----      | -----       | -----      | -----       | -----      | -----      | -----      | 1184 |
| Murine_leukemia_virus       | CCAGCTGGGA | TGCCCCAAA   | GTTTGGGGAC | TAAGACTCTA  | TCGATCCACA | GGGGCCGACC | CGGTGACCCG | 6308 |
| Phascolarctos_cinereus      | TCCG--AAAC | TGGCTACAGG  | G---GCGAAC | CTGGGGTCTA  | AGGTTCTATG | TGACTGGACA | CCCAGGCGTG | 6111 |
| Estrildidae                 | -----      | -----       | -----      | -----       | -----      | -----      | -----      | -    |
| Xenopus_Silurana_tropicalis | -----      | -----       | -----      | -----       | -----      | -----      | -----      | -    |
| L_XT                        | ACTGGNNTG  | NANAGTGAAT  | NNCTCTTNTN | GCNACAGGTA  | ATNNTNNACN | NATGAANNAN | NCNATGGCAT | 6548 |
| Takifugu_rubripes           | -----      | -----       | -----      | -----       | -----      | -----      | -----      | -    |
| Bos_taurus                  | -----      | -----       | -----      | -----       | -----      | -----      | -----      | -    |
| Homo_sapiens                | -----      | -----       | -----      | -----       | -----      | -----      | -----      | -    |
| Microcebus_murinus          | -----      | -----       | -----      | -----       | -----      | -----      | -----      | -    |
| Myotis_lucifugus            | -----      | -----       | -----      | -----       | -----      | -----      | -----      | -    |
| Equus_caballus              | -----      | -----       | -----      | -----       | -----      | -----      | -----      | -    |
| Tupaia_belangeri            | -----      | -----       | -----      | -----       | -----      | -----      | -----      | -    |
| Loxodonta_africana          | -----      | -----       | -----      | -----       | -----      | -----      | -----      | -    |
| Murinae                     | -----      | -----       | -----      | -----       | -----      | -----      | -----      | -    |
| Canis_lupus_familiaris      | -----      | -----       | -----      | -----       | -----      | -----      | -----      | -    |
| Sus_scrofa                  | -----      | -----       | -----      | -----       | -----      | -----      | -----      | -    |
| Choloepus_hoffmanni         | -----      | -----       | -----      | -----       | -----      | -----      | -----      | -    |
| Vicugna_pacos               | -----      | -----       | -----      | -----       | -----      | -----      | -----      | -    |
| Gavialis_gangeticus         | -----      | -----       | -----      | -----       | -----      | -----      | -----      | -    |
| Mammalia                    | -----      | -----       | -----      | -----       | -----      | -----      | -----      | -    |
| Passeroidea                 | -----      | -----       | -----      | -----       | -----      | -----      | -----      | -    |
| Takifugu                    | -----      | -----       | -----      | -----       | -----      | -----      | -----      | -    |
| Pteropus_vampyrus           | -----      | -----       | -----      | -----       | -----      | -----      | -----      | -    |
| Ornithorhynchus             | GTGGTGTAGA | AAAATTCTTG  | AATGCTGGA  | AATTCTTGAA  | AGGCAAAGAT | GGTATCTTAA | CCGCAGTACT | 1167 |
| Oryctolagus_cuniculus       | -----      | -----       | -----      | -----       | -----      | -----      | -----      | -    |
| Gallus_gallus               | -----      | -----       | -----      | -----       | -----      | -----      | -----      | -    |
| Hominidae                   | GNNCANNNGN | CTGNNCNCNN  | NNTACCNTNG | NCNNCCANTN  | NCGCNGGCNN | CNNNANNGCN | NACTCNCANC | 3335 |
| Metatheria                  | -----      | -----       | -----      | -----       | -----      | -----      | -----      | -    |
| Rodentia                    | TATTATTCGG | GACCTTTACA  | AATACTGCGA | GCGATCGGGG  | AAATGGAAAG | AGATTCCCCA | TTCCCTACGT | 953  |
| Monodelphis                 | -----      | -----       | -----      | -----       | -----      | -----      | -----      | -    |
| Consensus                   | -----      | -----       | -----      | -----       | -----      | -----      | -----      | -    |
| Conservation                | 100%       | -----       | -----      | -----       | -----      | -----      | -----      | 0%   |

|                             | 7,080                                                                          | 7,100 | 7,120 | 7,140 |      |
|-----------------------------|--------------------------------------------------------------------------------|-------|-------|-------|------|
| Dipodomys_ordii             | -----                                                                          | ----- | ----- | ----- | -    |
| Laurasiatheria              | -----                                                                          | ----- | ----- | ----- | -    |
| Eutheria                    | -----                                                                          | ----- | ----- | ----- | -    |
| Tarsius_syrichta            | -----                                                                          | ----- | ----- | ----- | -    |
| Muridae                     | AAATCGNAGT CTATATTGCC TGGNTTAAAG AGACAGGCAT CCTGGTGCCC TGCCAGTCAC CCTGGAATAT   |       |       |       | 1477 |
| Gasterosteus_aculeatus      | AAAAACAACA CGAGGACACC TGCCCTCAACC AGACCAGAAT AAACATACCT TACTCATACC CACTAGCGAG  |       |       |       | 1135 |
| Felis_silvestris            | -----                                                                          | ----- | ----- | ----- | -    |
| Rattus                      | -----                                                                          | ----- | ----- | ----- | -    |
| Papio_hamadryas             | CAGGCAAGCC GCCATGGCGG AAGTACTGAC CCTAGCCACA GAACCTGACA ACACCAGCCA CATAACTATT   |       |       |       | 4437 |
| Pan_troglodytes             | ---GCAAGCT AC----- ---ATTGAC CCAC---CT GACCCGGCCC CGACTTGCCA TATCCCAATC        |       |       |       | 2436 |
| Ailuropoda_melanoleuca      | -----                                                                          | ----- | ----- | ----- | -    |
| Cavia_porcellus             | -----                                                                          | ----- | ----- | ----- | -    |
| Ictidomys_tridecemlineatus  | -----                                                                          | ----- | ----- | ----- | -    |
| Canis                       | -----                                                                          | ----- | ----- | ----- | -    |
| Felis_catus                 | -----                                                                          | ----- | ----- | ----- | -    |
| Ochotona_princeps           | -----                                                                          | ----- | ----- | ----- | -    |
| Cercopithecidae             | ACAGCGCTCC AGGGGAAC TG CAACCCCTTTA ACCATCCATC CGAGGTGATT CTCTTCCTCC TGAAACTCCT |       |       |       | 609  |
| Carnivora                   | -----                                                                          | ----- | ----- | ----- | -    |
| Mus                         | GCTGCGCCCA CAATTGGCAG GTAAGAGAGT TCAGGGCGAC CCTCTTTTGA GTATGGAGCT TATGGGTACC   |       |       |       | 663  |
| Mus_musculus                | -----                                                                          | ----- | ----- | ----- | -    |
| Rattus_norvegicus           | -----                                                                          | ----- | ----- | ----- | -    |
| Tursiops_truncatus          | -----                                                                          | ----- | ----- | ----- | -    |
| Procapra_capensis           | -----                                                                          | ----- | ----- | ----- | -    |
| Primates                    | -----                                                                          | ----- | ----- | ----- | -    |
| Echinops_telfairi           | -----                                                                          | ----- | ----- | ----- | -    |
| Sorex_araneus               | -----                                                                          | ----- | ----- | ----- | -    |
| Canidae                     | -----                                                                          | ----- | ----- | ----- | -    |
| Otolemur_garnettii          | -----                                                                          | ----- | ----- | ----- | -    |
| Gallus                      | -----                                                                          | ----- | ----- | ----- | -    |
| Callithrix_jacchus          | -----                                                                          | ----- | ----- | ----- | -    |
| Crocodylus_porosus          | -----                                                                          | ----- | ----- | ----- | -    |
| Erinaceus_europaeus         | -----                                                                          | ----- | ----- | ----- | -    |
| rnd-6_family-7426-LTR-ERV1  | CTGCTGAGGA GATCTCATCN ATGGTNTTAA CNAAGATGAA GGAAACCGCC GAGGCTTTCC TTGGGACAAC   |       |       |       | 211  |
| Esox_lucius                 | -----                                                                          | ----- | ----- | ----- | -    |
| Salmo_salar                 | -----                                                                          | ----- | ----- | ----- | -    |
| Didelphidae                 | -----                                                                          | ----- | ----- | ----- | -    |
| Latimeria_chalumnae         | ACCCATAGGA GGTGTCCGGG CAAAGCTTAC CTGCGACACA CCTAGCCCTG CCACCCCTTC GCCCTTCCAG   |       |       |       | 685  |
| Monodelphis_domestica       | -----                                                                          | ----- | ----- | ----- | -    |
| Macropus_eugenii            | -----                                                                          | ----- | ----- | ----- | -    |
| Alligator_mississippiensis  | -----                                                                          | ----- | ----- | ----- | -    |
| Chrysemys_picta_belli       | TTTACTGACT CTATGCTTTT GGGTTCATGT AGCTTGGAA GAGGGTCTAC ACCGGTCTCC TAAGATGGAA    |       |       |       | 1926 |
| Danio_rerio                 | -----                                                                          | ----- | ----- | ----- | -    |
| Taeniopygia                 | -----                                                                          | ----- | ----- | ----- | -    |
| Dasyopus_novemcinctus       | -----                                                                          | ----- | ----- | ----- | -    |
| LTR_XT                      | -----                                                                          | ----- | ----- | ----- | -    |
| Haplorrhini                 | --TCAGGCTG CACACCTCAG CAACCTAAAC AATCTAGGAG TAGTCTGCAA GAACTTAGGA CAAGAAAGAG   |       |       |       | 7050 |
| Catarrhini                  | --T--GCTG -----TCAT TAATAGCAAT AAGTTAGGAA GGGGATGTGG CTCTTTTGTG TGGGAAAAAG     |       |       |       | 6223 |
| Anolis_carolinensis         | -----                                                                          | ----- | ----- | ----- | -    |
| Murine_leukemia_virus       | GTTCTCTTTG ACCCGCCAGG TCCTCAATGT AGGACCCCG -CGTCCCAT TGGGCCT-AA TCCCGTGATC     |       |       |       | 6375 |
| Phascolarctos_cinereus      | ---CAGTTG ACCATACGAC TAGTGATCAC AAGTCCCCCA CCGGTAGTAG TGGGCCCGCA TCCTGTCTCC    |       |       |       | 6177 |
| Estrildidae                 | -----                                                                          | ----- | ----- | ----- | -    |
| Xenopus_Silurana_tropicalis | -----                                                                          | ----- | ----- | ----- | -    |
| L_XT                        | TNAAACATAT NNNTCTATGG NCAGATAAAT GGGNTGGTTT CAGANTGNN NNGNTNTCAN GGTACANNAT    |       |       |       | 6618 |
| Takifugu_rubripes           | -----                                                                          | ----- | ----- | ----- | -    |
| Bos_taurus                  | -----                                                                          | ----- | ----- | ----- | -    |
| Homo_sapiens                | -----                                                                          | ----- | ----- | ----- | -    |
| Microcebus_murinus          | -----                                                                          | ----- | ----- | ----- | -    |
| Myotis_lucifugus            | -----                                                                          | ----- | ----- | ----- | -    |
| Equus_caballus              | -----                                                                          | ----- | ----- | ----- | -    |
| Tupaia_belangeri            | -----                                                                          | ----- | ----- | ----- | -    |
| Loxodonta_africana          | -----                                                                          | ----- | ----- | ----- | -    |
| Murinae                     | -----                                                                          | ----- | ----- | ----- | -    |
| Canis_lupus_familiaris      | -----                                                                          | ----- | ----- | ----- | -    |
| Sus_scrofa                  | -----                                                                          | ----- | ----- | ----- | -    |
| Choloepus_hoffmanni         | -----                                                                          | ----- | ----- | ----- | -    |
| Vicugna_pacos               | -----                                                                          | ----- | ----- | ----- | -    |
| Gavialis_gangeticus         | -----                                                                          | ----- | ----- | ----- | -    |
| Mammalia                    | -----                                                                          | ----- | ----- | ----- | -    |
| Passeroidea                 | -----                                                                          | ----- | ----- | ----- | -    |
| Takifugu                    | -----                                                                          | ----- | ----- | ----- | -    |
| Pteropus_vampyrus           | -----                                                                          | ----- | ----- | ----- | -    |
| Ornithorhynchus             | TTGTAGTTGT ACAAAAAGCT GTTTGGGAAG AAGGTTAATT TCAGGGGGGT AGCTTCGTAG TGTTACAGCA   |       |       |       | 1237 |
| Oryctolagus_cuniculus       | -----                                                                          | ----- | ----- | ----- | -    |
| Gallus_gallus               | -----                                                                          | ----- | ----- | ----- | -    |
| Hominidae                   | TNCANTTTTA TCCNNNNCGA NCNNNCNNNN NNNTNTNNNN NNCNANNCAN ATNNNCNNNA NNCNANTTNN   |       |       |       | 3405 |
| Metatheria                  | -----                                                                          | ----- | ----- | ----- | -    |
| Rodentia                    | CCAAGCTTTC TCTTATCTCC GCTCCAACC TTCTCTCTGT TCTCCCACTC AGCTCCTCCT AGCTATGAAG    |       |       |       | 1023 |
| Monodelphis                 | -----                                                                          | ----- | ----- | ----- | -    |
| Consensus                   | -----                                                                          | ----- | ----- | ----- | -    |
| Conservation                | 100%<br>0%                                                                     |       |       |       |      |

|                             | 7,160      |             | 7,180        |            | 7,200      |            |                   |
|-----------------------------|------------|-------------|--------------|------------|------------|------------|-------------------|
| Dipodomys_ordii             | -----      | -----       | -----        | -----      | -----      | -----      | -                 |
| Laurasiatheria              | -----      | -----       | -----        | -----      | -----      | -----      | -                 |
| Eutheria                    | -----      | -----       | -----        | -----      | -----      | -----      | -                 |
| Tarsius_syrichtha           | -----      | -----       | -----        | -----      | -----      | -----      | -                 |
| Muridae                     | GCCTCTCCTG | CCTGTGAAGA  | AACTGGGACC   | TCTGATTCTC | AGGTGANTCC | TCCAGAGAAA | CAGGTGTTCA 1547   |
| Gasterosteus_aculeatus      | GATAAACTCA | CCTCTGGAGT  | TGCCTCAACC   | GAACAGCCAT | TGTAAGCAGG | AAATGGCGTG | GCAGACCTAG 1205   |
| Felis_silvestris            | -----      | -----       | -----        | -----      | -----      | -----      | -                 |
| Rattus                      | -----      | -----       | -----        | -----      | -----      | -----      | -                 |
| Papio_hamadryas             | GAACATACTT | ATACCTCCGA  | AGACCAGGAA   | GAAGCAAGAG | CCATAGGGGC | TACAGAAAAC | AAAGACACTA 4507   |
| Pan_troglodytes             | AGAAAGAC-- | -----       | -----        | --AGTGTGAA | CC-----    | -----C     | CTAAACAAAA 2465   |
| Ailuropoda_melanoleuca      | -----      | -----       | -----        | -----      | -----      | -----      | -                 |
| Cavia_porcellus             | -----      | -----       | -----        | -----      | -----      | -----      | -                 |
| Ictidomys_tridecemlineatus  | -----      | -----       | -----        | -----      | -----      | -----      | -                 |
| Canis                       | -----      | -----       | -----        | -----      | -----      | -----      | -                 |
| Felis_catus                 | -----      | -----       | -----        | -----      | -----      | -----      | -                 |
| Ochotona_princeps           | -----      | -----       | -----        | -----      | -----      | -----      | -                 |
| Cercopithecidae             | TCCGTAAGTA | GCCTCAGATG  | TAAATATCCG   | TCCAACCTAA | TCTCTCCTAC | GTTGATAAGA | GCTTCTTTCC 679    |
| Carnivora                   | -----      | -----       | -----        | -----      | -----      | -----      | -                 |
| Mus                         | TTGACCTCTA | GGCGTATGTT  | ATGGCAGTCG   | CGAATTAGAA | AGTTACAGGT | GAGGTCAGAT | TAACATTGTT 733    |
| Mus_musculus                | -----      | -----       | -----        | -----      | -----      | -----      | -                 |
| Rattus_norvegicus           | -----      | -----       | -----        | -----      | -----      | -----      | -                 |
| Tursiops_truncatus          | -----      | -----       | -----        | -----      | -----      | -----      | -                 |
| Procapra_capensis           | -----      | -----       | -----        | -----      | -----      | -----      | -                 |
| Primates                    | -----      | -----       | -----        | -----      | -----      | -----      | -                 |
| Echinops_telfairi           | -----      | -----       | -----        | -----      | -----      | -----      | -                 |
| Sorex_araneus               | -----      | -----       | -----        | -----      | -----      | -----      | -                 |
| Canidae                     | -----      | -----       | -----        | -----      | -----      | -----      | -                 |
| Otolemur_garnettii          | -----      | -----       | -----        | -----      | -----      | -----      | -                 |
| Gallus                      | -----      | -----       | -----        | -----      | -----      | -----      | -                 |
| Callithrix_jacchus          | -----      | -----       | -----        | -----      | -----      | -----      | -                 |
| Crocodylus_porosus          | -----      | -----       | -----        | -----      | -----      | -----      | -                 |
| Erinaceus_europaeus         | -----      | -----       | -----        | -----      | -----      | -----      | -                 |
| rnd-6_family-7426-LTR-ERV1  | TGTTAAGAAC | GCTGTGGTCA  | CCGTCCAGC    | TTACTTCAAT | GACTCGCAA  | GNCAGGCAAC | TAAGGATGCT 281    |
| Esox_lucius                 | -----      | -----       | -----        | -----      | -----      | -----      | -                 |
| Salmo_salar                 | -----      | -----       | -----        | -----      | -----      | -----      | -                 |
| Didelphidae                 | -----      | -----       | -----        | -----      | -----      | -----      | -                 |
| Latimeria_chalumnae         | CCGTGTGGCA | GTTGATTGCA  | CATCCACAAA   | CCTCGTACAC | GAACCTTAC  | ATGAATCTAA | CCCGATCAAA 755    |
| Monodelphis_domestica       | -----      | -----       | -----        | -----      | -----      | -----      | -                 |
| Macropus_eugenii            | -----      | -----       | -----        | -----      | -----      | -----      | -                 |
| Alligator_mississippiensis  | -----      | -----       | -----        | -----      | -----      | -----      | -                 |
| Chrysemys_picta_bellii      | TCTTGAGCGT | ACTCCCTCAG  | CTAGCGTGTA   | TGCAAGCCAC | AAGGATAGAT | GTGAGGGAAT | GCGCAGACGG 1996   |
| Danio_rerio                 | -----      | -----       | -----        | -----      | -----      | -----      | -                 |
| Taeniopygia                 | -----      | -----       | -----        | -----      | -----      | -----      | -                 |
| Dasybus_novemcinctus        | -----      | -----       | -----        | -----      | -----      | -----      | -                 |
| LTR_XT                      | -----      | -----       | -----        | -----      | -----      | -----      | -                 |
| Haplorrhini                 | TCAGCAGCAA | GGCTGCTAAG  | ATCATAACAG   | GAGAACCAGA | AGAAGAATGT | CCTGATTGTA | ACATTCA - AT 7119 |
| Catarrhini                  | ---GCTATAT | GACCG - AAA | ATAAGTACAT   | TTGTCATGAA | TTAGGACTGT | GTGGAAATGA | ATGTGGATAC 6288   |
| Anolis_carolinensis         | -----      | -----       | -----        | -----      | -----      | -----      | -                 |
| Murine_leukemia_virus       | ACTGACCAGC | TACCCCATC   | CCAA - - CCC | GTGCAGATCA | TGCTCCCAG  | GCCTCCTCAT | CCTCCTCCTT 6442   |
| Phascolarctos_cinereus      | GCAGAACAAG | GACCTCCCAG  | AAAAATCCC    | TTCTCCCCA  | GAGTGCCGGT | TCCTACCCTA | TCACCCCAG 6247    |
| Estrildidae                 | -----      | -----       | -----        | -----      | -----      | -----      | -                 |
| Xenopus_Silurana_tropicalis | TAAGCATTGT | ATGATCATAA  | AAGAACCATT   | TTTTTAAAGA | TTATCTGAAA | GAATATCTAT | CTGATCTTTT 79     |
| IXT                         | TANNTNNGGT | AATCAGACAA  | GAAC TACCAN  | TATATTCAAC | ANAGCTTATT | CANGGCTNCC | TATGGTAGCA 6688   |
| Takifugu_rubripes           | -----      | -----       | -----        | -----      | -----      | -----      | -                 |
| Bos_taurus                  | -----      | -----       | -----        | -----      | -----      | -----      | -                 |
| Homo_sapiens                | -----      | -----       | -----        | -----      | -----      | -----      | -                 |
| Microcebus_murinus          | -----      | -----       | -----        | -----      | -----      | -----      | -                 |
| Myotis_lucifugus            | -----      | -----       | -----        | -----      | -----      | -----      | -                 |
| Equus_caballus              | -----      | -----       | -----        | -----      | -----      | -----      | -                 |
| Tupaia_belangeri            | -----      | -----       | -----        | -----      | -----      | -----      | -                 |
| Loxodonta_africana          | -----      | -----       | -----        | -----      | -----      | -----      | -                 |
| Murinae                     | -----      | -----       | -----        | -----      | -----      | -----      | -                 |
| Canis_lupus_familiaris      | -----      | -----       | -----        | -----      | -----      | -----      | -                 |
| Sus_scrofa                  | -----      | -----       | -----        | -----      | -----      | -----      | -                 |
| Choloepus_hoffmanni         | -----      | -----       | -----        | -----      | -----      | -----      | -                 |
| Vicugna_pacos               | -----      | -----       | -----        | -----      | -----      | -----      | -                 |
| Gavialis_gangeticus         | -----      | -----       | -----        | -----      | -----      | -----      | -                 |
| Mammalia                    | -----      | -----       | -----        | -----      | -----      | -----      | -                 |
| Passeroidea                 | -----      | -----       | -----        | -----      | -----      | -----      | -                 |
| Takifugu                    | -----      | -----       | -----        | -----      | -----      | -----      | -                 |
| Pteropus_vampyrus           | -----      | -----       | -----        | -----      | -----      | -----      | -                 |
| Ornithorhynchus             | TGCTCTTTGC | GGTAGTTTCC  | TGTTCTGGA    | GCGAGTTTTG | TGCTGGATC  | CCTGAATCGG | CTCTCATATA 1307   |
| Oryctolagus_cuniculus       | -----      | -----       | -----        | -----      | -----      | -----      | -                 |
| Gallus_gallus               | -----      | -----       | -----        | -----      | -----      | -----      | -                 |
| Hominidae                   | TNCNNNNNTN | CTNGGNCNCC  | CGNTAGGACN   | CNNCNNNCNG | NTGNNGCNN  | NNNTTTNCNG | GCAGCNTGNN 3475   |
| Metatheria                  | -----      | -----       | -----        | -----      | -----      | -----      | -                 |
| Rodentia                    | CCCGAACAG  | ATGATTCCTC  | CACTATTTTC   | GATCCNGCTA | ATGAGCCTCC | CCCTTATCGG | CCTCAACCCA 1093   |
| Monodelphis                 | -----      | -----       | -----        | -----      | -----      | -----      | -                 |
| Consensus                   | -----      | -----       | -----        | -----      | -----      | -----      | -                 |
| Conservation                | 100%       | -----       | -----        | -----      | -----      | -----      | -----             |
|                             | 0%         | -----       | -----        | -----      | -----      | -----      | -----             |

|                             | 7,220      | 7,240      | 7,260        | 7,280      |            |             |              |      |
|-----------------------------|------------|------------|--------------|------------|------------|-------------|--------------|------|
| Dipodomys_ordii             | -----      | -----      | -----        | -----      | -          |             |              |      |
| Laurasiatheria              | -----      | -----      | -----        | -----      | -          |             |              |      |
| Eutheria                    | -----      | -----      | -----        | -----      | -          |             |              |      |
| Tarsius_syrichtha           | -----      | -----      | -----        | -----      | -          |             |              |      |
| Muridae                     | CCGCTCTTGG | CCTGAAAGAT | GTATTCTTCA   | GCCTCCCAT  | GGCAGAGGTG | AGTCAACCCA  | TCTTTNCTTT   | 1617 |
| Gasterosteus_aculeatus      | CTAATAGTAC | AACTCCAAAC | CCTAAATGTC   | CCAGACATGT | FACTGTTGAT | CAAGCTTTTC  | CTACCGCGAG   | 1275 |
| Felis_silvestris            | -----      | -----      | -----        | -----      | -----      | -----       | -----        | -    |
| Rattus                      | -----      | -----      | -----        | -----      | -----      | -----       | -----        | -    |
| Papio_hamdryas              | GAAACTGGGA | AAAAGAAGGG | AAAATAGTCC   | TTCCCAAAA  | GGAAGCCCTG | GCAATGATCC  | AGCAGATGCA   | 4577 |
| Pan_troglodytes             | GATGGTGGGA | AATGAAA    | -----C       | TCCTCCAGAA | AAAAGC     | -----       | -----        | 2499 |
| Ailuropoda_melanoleuca      | -----      | -----      | -----        | -----      | -----      | -----       | -----        | -    |
| Cavia_porcellus             | -----      | -----      | -----        | -----      | -----      | -----       | -----        | -    |
| Ictidomys_tridecemlineatus  | -----      | -----      | -----        | -----      | -----      | -----       | -----        | -    |
| Canis                       | -----      | -----      | -----        | -----      | -----      | -----       | -----        | -    |
| Felis_catus                 | -----      | -----      | -----        | -----      | -----      | -----       | -----        | -    |
| Ochotona_princeps           | -----      | -----      | -----        | -----      | -----      | -----       | -----        | -    |
| Cercopithecidae             | TCCAGCACTT | TGCTTTGGGA | CCGATCATAC   | TGGACTCCCA | GGTTCACTT  | TCGAGCCTGA  | CACCAACTTC   | 749  |
| Carnivora                   | -----      | -----      | -----        | -----      | -----      | -----       | -----        | -    |
| Mus                         | AGAGCGAGAA | AGTGTCAAGG | GAACGAGAGA   | AAGAGAAGAG | AGAGAGAAGA | AGGGAGAGAA  | TTGACTAATT   | 803  |
| Mus_musculus                | -----      | -----      | -----        | -----      | -----      | -----       | -----        | -    |
| Rattus_norvegicus           | -----      | -----      | -----        | -----      | -----      | -----       | -----        | -    |
| Tursiops_truncatus          | -----      | -----      | -----        | -----      | -----      | -----       | -----        | -    |
| Procapra_capensis           | -----      | -----      | -----        | -----      | -----      | -----       | -----        | -    |
| Primates                    | -----      | -----      | -----        | -----      | -----      | -----       | -----        | -    |
| Echinops_telfairi           | -----      | -----      | -----        | -----      | -----      | -----       | -----        | -    |
| Sorex_araneus               | -----      | -----      | -----        | -----      | -----      | -----       | -----        | -    |
| Canidae                     | -----      | -----      | -----        | -----      | -----      | -----       | -----        | -    |
| Otolemur_garnettii          | -----      | -----      | -----        | -----      | -----      | -----       | -----        | -    |
| Gallus                      | -----      | -----      | -----        | -----      | -----      | -----       | -----        | -    |
| Callithrix_jacchus          | -----      | -----      | -----        | -----      | -----      | -----       | -----        | -    |
| Crocodylus_porosus          | -----      | -----      | -----        | -----      | -----      | -----       | -----        | -    |
| Erinaceus_europaeus         | -----      | -----      | -----        | -----      | -----      | -----       | -----        | -    |
| rnd-6_family-7426-LTR-ERV1  | GGCGTTATTG | CAGGTCTNAA | TGTNATGAGN   | ATTATCAATG | AACCTACNGC | AGCTGCNATT  | GCTTATGGTC   | 351  |
| Esox_lucius                 | -----      | -----      | -----        | -----      | -----      | -----       | -----        | -    |
| Salmo_salar                 | -----      | -----      | -----        | -----      | -----      | -----       | -----        | -    |
| Didelphidae                 | -----      | -----      | -----        | -----      | -----      | -----       | -----        | -    |
| Latimeria_chalumnae         | TTGATCAGAA | ACTTTAAATT | TTCATTCTCG   | CCTGCTGGAG | GAATTTAAAT | TTTATCTAGT  | CACATAAAAC   | 825  |
| Monodelphis_domestica       | -----      | -----      | -----        | -----      | -----      | -----       | -----        | -    |
| Macropus_eugenii            | -----      | -----      | -----        | -----      | -----      | -----       | -----        | -    |
| Alligator_mississippiensis  | -----      | -----      | -----        | -----      | -----      | -----       | -----        | -    |
| Chrysemys_picta_belli       | CAAGCTGTCT | CCTACCCAGG | AGATCTGTGC   | ATCCACAGTA | CTCCCAGACT | CCCAAAGAAA  | CTCTGGCTGG   | 2066 |
| Danio_rerio                 | -----      | -----      | -----        | -----      | -----      | -----       | -----        | -    |
| Taeniopygia                 | -----      | -----      | -----        | -----      | -----      | -----       | -----        | -    |
| Dasybus_novemcinctus        | -----      | -----      | -----        | -----      | -----      | -----       | -----        | -    |
| LTR_XT                      | -----      | -----      | -----        | -----      | -----      | -----       | -----        | -    |
| Haplorrhini                 | GGACCACACA | TGAGTTCAGC | CAACGCCTTT   | ACGCAGGGAG | AGTAGCTCTG | CTTGCCAGCC  | AAGAAGCAAA   | 7189 |
| Catarrhini                  | TGGTCTTGTG | TCATTTGGGC | CA - CTTGGAT | AAAAAATGAA | AAGGATCCAG | TCCACCTTCA  | GAAAGGAAAA   | 6357 |
| Anolis_carolinensis         | -----      | -----      | -----        | -----      | -----      | -----       | -----        | 1184 |
| Murine_leukemia_virus       | CAGGCGCGGT | CTCTATGGTG | CCTGG - GGCT | CCCCCGCCTT | -----CTCAA | CAACCTGGGA  | CGGGAGACAG   | 6506 |
| Phascolarctos_cinereus      | CGTCCCCAT  | CCCCACGGTA | CAGGCTAGCC   | CCCCCGCCCC | TAGTACTCCA | TCTCCCACCA  | CGGGCGACCG   | 6317 |
| Estrildidae                 | -----      | -----      | -----        | -----      | -----      | -----       | -----        | -    |
| Xenopus_Silurana_tropicalis | TGACCCCTTT | AGAATATATA | ANAATGGTTG   | TNCCTTATCA | GACAAAACCA | GAACAATAAT  | AAT - - -GAC | 145  |
| L_XT                        | TNNNGATATT | GTACCATANA | AAGNGNTATA   | NCGGTTATCA | GACAANATCT | GAACATCNNA  | NACANAGNAA   | 6758 |
| Takifugu_rubripes           | -----      | -----      | -----        | -----      | -----      | -----       | -----        | 25   |
| Bos_taurus                  | -----      | -----      | -----        | -----      | -----      | -----       | -----        | -    |
| Homo_sapiens                | -----      | -----      | -----        | -----      | -----      | -----       | -----        | -    |
| Microcebus_murinus          | -----      | -----      | -----        | -----      | -----      | -----       | -----        | -    |
| Myotis_lucifugus            | -----      | -----      | -----        | -----      | -----      | -----       | -----        | -    |
| Equus_caballus              | -----      | -----      | -----        | -----      | -----      | -----       | -----        | -    |
| Tupaia_belangeri            | -----      | -----      | -----        | -----      | -----      | -----       | -----        | -    |
| Loxodonta_africana          | -----      | -----      | -----        | -----      | -----      | -----       | -----        | -    |
| Murinae                     | -----      | -----      | -----        | -----      | -----      | -----       | -----        | -    |
| Canis_lupus_familiaris      | -----      | -----      | -----        | -----      | -----      | -----       | -----        | -    |
| Sus_scrofa                  | -----      | -----      | -----        | -----      | -----      | -----       | -----        | -    |
| Choloepus_hoffmanni         | -----      | -----      | -----        | -----      | -----      | -----       | -----        | -    |
| Vicugna_pacos               | -----      | -----      | -----        | -----      | -----      | -----       | -----        | -    |
| Gavialis_gangeticus         | -----      | -----      | -----        | -----      | -----      | -----       | -----        | -    |
| Mammalia                    | -----      | -----      | -----        | -----      | -----      | -----       | -----        | -    |
| Passeroidea                 | -----      | -----      | -----        | -----      | -----      | -----       | -----        | -    |
| Takifugu                    | -----      | -----      | -----        | -----      | -----      | -----       | -----        | -    |
| Pteropus_vampyrus           | -----      | -----      | -----        | -----      | -----      | -----       | -----        | -    |
| Ornithorhynchus             | TGCTCTGAAG | CGGCCCCAGA | CCCTTGGCGA   | GCCGCAGCTT | CATCCTTACT | TCGCTTAGGA  | ACGCCCTGCG   | 1377 |
| Oryctolagus_cuniculus       | -----      | -----      | -----        | -----      | -----      | -----       | -----        | -    |
| Gallus_gallus               | -----      | -----      | -----        | -----      | -----      | -----       | -----        | -    |
| Hominidae                   | NCNAGNNCNN | NNGGCTNGCN | NNCCTGCCTN   | NNNGNCTNNN | CAGCNCNNN  | NGNNNTTAAAT | CCNNNNNNNG   | 3545 |
| Metatheria                  | -----      | -----      | -----        | -----      | -----      | -----       | -----        | -    |
| Rodentia                    | CAGCTCCTCT | CCCCNCTCC  | CTCCTGTCTC   | CCTTTCTCCC | TCTTCAGCAA | CAGGCCGCC   | AAATCAACTC   | 1163 |
| Monodelphis                 | -----      | -----      | -----        | -----      | -----      | -----       | -----        | 36   |
| Consensus                   | -----      | -----      | -----        | -----      | -----      | -----       | -----        | -    |
| Conservation                | 100%       | -----      | -----        | -----      | -----      | -----       | -----        | 0%   |

|                             | 7,300       | 7,320      | 7,340      |             |              |            |             |      |
|-----------------------------|-------------|------------|------------|-------------|--------------|------------|-------------|------|
| Dipodomys_ordii             | -----       | -----      | -----      | -           |              |            |             |      |
| Laurasiatheria              | -----       | -----      | -----      | -           |              |            |             |      |
| Eutheria                    | -----       | -----      | -----      | -           |              |            |             |      |
| Tarsius_syrichtha           | -----       | -----      | -----      | -           |              |            |             |      |
| Muridae                     | TAANTGAAA   | GACCCANCG  | GAGATTATAG | TGGGCAACAT  | AACTGAACNA   | NTTTGCCCA  | GTATTTAAAG  | 1687 |
| Gasterosteus_aculeatus      | TTTCATTATA  | GAATTCTTAC | CGTCTCAGGG | TACAATCCCG  | GTTAAGAGTT   | AGAATTTGTC | TCCAGGCTTC  | 1345 |
| Felis_silvestris            | -----       | -----      | -----      | -----       | -----        | -----      | -----       | -    |
| Rattus                      | -----       | -----      | -----      | -----       | -----        | -----      | -----       | -    |
| Papio_hamadryas             | TGCCTGGACA  | CACCTGGGTA | ATCGAAAGCT | AAAATTGTTA  | ATTGAAAAA    | CTGACTTTCT | AATCCCAAGG  | 4647 |
| Pan_troglodytes             | -----A      | CAGTGTAACA | ATCCACAACC | ---ACTGCCG  | GGTGAACCTA   | TCACCAATCA | AATCC-----  | 2552 |
| Ailuropoda_melanoleuca      | -----       | -----      | -----      | -----       | -----        | -----      | -----       | -    |
| Cavia_porcellus             | -----       | -----      | -----      | -----       | -----        | -----      | -----       | -    |
| Ictidomys_tridecemlineatus  | -----       | -----      | -----      | -----       | -----        | -----      | -----       | -    |
| Canis                       | -----       | -----      | -----      | -----       | -----        | -----      | -----       | -    |
| Felis_catus                 | -----       | -----      | -----      | -----       | -----        | -----      | -----       | -    |
| Ochotona_princeps           | -----       | -----      | -----      | -----       | -----        | -----      | -----       | -    |
| Cercopithecidae             | ATAGTGATGA  | TTTCGATTGA | CCTTACTGGA | AGGTACGGCC  | AAGCCATTGC   | GTACTACTGG | TTAGTACGGA  | 819  |
| Carnivora                   | -----       | -----      | -----      | -----       | -----        | -----      | -----       | -    |
| Mus                         | GGCGCAGTGA  | GATCAGAGGG | ACCTGGACAG | CAGGAGCCTG  | AAACCAGCTA   | TGCAAAAAGA | TGGAGATGCC  | 873  |
| Mus_musculus                | -----       | -----      | -----      | -----       | -----        | -----      | -----       | -    |
| Rattus_norvegicus           | -----       | -----      | -----      | -----       | -----        | -----      | -----       | -    |
| Tursiops_truncatus          | -----       | -----      | -----      | -----       | -----        | -----      | -----       | -    |
| Procyon_capensis            | -----       | -----      | -----      | -----       | -----        | -----      | -----       | -    |
| Primates                    | -----       | -----      | -----      | -----       | -----GAGGG   | CGCCCGGAGT | CCACCCGAGC  | 25   |
| Echinops_telfairi           | -----       | -----      | -----      | -----       | -----        | -----      | -----       | -    |
| Sorex_araneus               | -----       | -----      | -----      | -----       | -----        | -----      | -----       | -    |
| Canidae                     | -----       | -----      | -----      | -----       | -----        | -----      | -----       | -    |
| Otolemur_garnettii          | -----       | -----      | -----      | -----       | -----        | -----      | -----       | -    |
| Gallus                      | -----       | -----      | -----      | -----       | -----        | -----      | -----       | -    |
| Callithrix_jacchus          | -----       | -----      | -----      | -----       | -----        | -----      | -----       | -    |
| Crocodylus_porosus          | -----       | -----      | -----      | -----       | -----        | -----      | -----       | -    |
| Erinaceus_europaeus         | -----       | -----      | -----      | -----       | -----        | -----      | -----       | -    |
| rnd-6_family-7426-LTR-ERV1  | TGGATAAAAA  | GGCTACCAGT | GTAGGTGAGA | AGAACGTGCT  | CATCTTCGAT   | CTGGGTGGTG | GTACTTTTCGA | 421  |
| Esox_lucius                 | -----       | -----      | -----      | -----       | -----        | -----      | -----       | -    |
| Salmo_salar                 | -----       | -----      | -----      | -----       | -----TAATCAG | AGAAAAATTT | AACCTTTAAA  | 27   |
| Didelphidae                 | -----       | -----      | -----      | -----       | -----        | -----      | -----       | -    |
| Latimeria_chalumnae         | CTTGCTCCTC  | CGTAGCCAAC | AGAATGGTGC | CGGCTAATAA  | AATATTGGAC   | CCTGACTGTG | CTGCTTGCCA  | 895  |
| Monodelphis_domestica       | -----       | -----      | -----      | -----       | -----        | -----      | -----       | -    |
| Macropus_eugenii            | -----       | -----      | -----      | -----       | -----        | -----      | -----       | -    |
| Alligator_mississippiensis  | -----       | -----      | -----      | -----       | -----        | -----      | -----       | -    |
| Chrysemys_picta_belli       | CAAGTCTTTT  | TCCAGGGTT  | CCAAGCTATC | TGCACTCAAC  | CAGGGCAAGA   | GGTTTATAAA | ATTCCCGGTA  | 2136 |
| Danio_rerio                 | -----TTTTAT | -----      | AATAATAGTT | AATTTTTATG  | TAAAAGTTAT   | ATATTTAAAG | TATTTTTAAT  | 55   |
| Taeniopygia                 | -----       | -----      | -----      | -----       | -----        | -----      | -----       | -    |
| Dasyus_novemcinctus         | -----       | -----      | -----      | -----       | -----        | -----      | -----       | -    |
| LTR_XT                      | -----       | -----      | -----      | -----       | -----        | -----      | -----       | -    |
| Haplorrhini                 | GATTGGT---  | TGTGCGAC   | TAAAACATGC | AACCCCTTA   | ATCTGACCAT   | ATTAAAGCCA | AACATGCCTT  | 7254 |
| Catarrhini                  | AATGGCCCTT  | CCTGTAATAA | GGGACAATGT | AACCCCTTAG  | AGCTAGTAAT   | AACCAATCCC | CTTGATCCTC  | 6427 |
| Anolis_carolinensis         | -----       | -----      | -----      | -----       | -----        | -----      | -----       | 1184 |
| Murine_leukemia_virus       | GCTGCTAAAC  | CTGGTAGAAG | GAGCCTACCA | AGCAC--TCA  | ACCTCACCAAG  | TCCCGACAAA | ACCCAAGAGT  | 6574 |
| Phascolarctos_cinereus      | GCTCTTTGGC  | CTCGTACAAG | GGGCTTTTCT | GGCCT--TGA  | ATGCCACCAA   | CCCGGAGGCC | ACGGAGTCTT  | 6385 |
| Estrildidae                 | -----       | -----      | -----      | -----       | -----        | -----      | -----       | -    |
| Xenopus_Silurana_tropicalis | ANTANAATAT  | NAGTTCAGN  | GTTATTCACA | AANCAATGG   | AATTATTTAN   | CATTAGTACA | ATNAATGTGT  | 215  |
| I_XT                        | ATCAANTTAT  | CCACATGANN | GNANTTNACN | AAAAAAAGNN  | TTTNNTTTCC   | ACCTCAGATN | AANAAGGTAT  | 6828 |
| Takifugu_rubripes           | GTCAATGTGC  | AGGGGTGAGG | CGGGACAGNG | CAGNGTAAGG  | TANAGNNNAG   | --CTCAAGCC | AGNNGNTNCN  | 93   |
| Bos_taurus                  | -----       | -----      | -----      | -----       | -----        | -----      | -----       | -    |
| Homo_sapiens                | -----       | -----      | -----      | -----       | -----        | -----      | -----       | -    |
| Microcebus_murinus          | -----       | -----      | -----      | -----       | -----        | -----      | -----       | -    |
| Myotis_lucifugus            | -----       | -----      | -----      | -----       | -----        | -----      | -----       | -    |
| Equus_caballus              | -----       | -----      | -----      | -----       | -----        | -----      | -----       | -    |
| Tupaia_belangeri            | -----       | -----      | -----      | -----       | -----        | -----      | -----       | -    |
| Loxodonta_africana          | -----       | -----      | -----      | -----       | -----        | -----      | -----       | -    |
| Murinae                     | -----       | -----      | -----      | -----       | -----        | -----      | -----       | -    |
| Canis_lupus_familiaris      | -----       | -----      | -----      | -----       | -----        | -----      | -----       | -    |
| Sus_scrofa                  | -----       | -----      | -----      | -----       | -----        | -----      | -----       | -    |
| Choloepus_hoffmanni         | -----       | -----      | -----      | -----       | -----        | -----      | -----       | -    |
| Vicugna_pacos               | -----       | -----      | -----      | -----       | -----        | -----      | -----       | -    |
| Gavialis_gangeticus         | -----       | -----      | -----      | -----       | -----        | -----      | -----       | -    |
| Mammalia                    | -----       | -----      | -----      | -----       | -----        | -----      | -----TGTA   | 5    |
| Passeroidea                 | -----       | -----      | -----      | -----       | -----        | -----      | -----       | -    |
| Takifugu                    | -----       | -----      | -----      | -----       | -----        | -----      | -----       | -    |
| Pteropus_vampyrus           | -----       | -----      | -----      | -----       | -----        | -----      | -----       | -    |
| Ornithorhynchus             | CCTTGGGCTC  | CCGATAAAAA | CCTTCCCTG  | TTGTCAATGAG | TGGGTGGCGT   | GGGTCTTGC  | CAACTGGCCC  | 1447 |
| Oryctolagus_cuniculus       | -----       | -----      | -----      | -----       | -----        | -----      | -----       | -    |
| Gallus_gallus               | -----       | -----      | -----      | -----       | -----        | -----      | -----       | -    |
| Hominidae                   | NCCNCNANCT  | TAGTCTCTCN | NNCNCNNCT  | CNNNTNNAAC  | NCCNCCANC    | NNNNNACNNA | NNTNCTCNCT  | 3615 |
| Metatheria                  | -----       | -----      | -----      | -----       | -----        | -----      | -----       | -    |
| Rodentia                    | TCCCGGCAC   | CCACTTTTCA | CCCACGGCA  | GCCCCTCTC   | TGCTACTCC    | GCTCCGCCAT | AGGACCCCT   | 1233 |
| Monodelphis                 | NATGNAATTN  | ANNAANNCTN | NNCTNNTNGN | NNAGNNNNAN  | NTGNNNNNCC   | TGCCANTTT  | TAGATTTANT  | 106  |
| Consensus                   | -----       | -----      | -----      | -----       | -----        | -----      | -----       | -    |
| Conservation                | 100%        | -----      | -----      | -----       | -----        | -----      | -----       | 0%   |

|                             | 7,360                                                                         | 7,380       | 7,400                                                   | 7,420                                      |                                     |
|-----------------------------|-------------------------------------------------------------------------------|-------------|---------------------------------------------------------|--------------------------------------------|-------------------------------------|
| Dipodomys_ordii             | -----                                                                         | -----       | -----                                                   | -----                                      | -                                   |
| Laurasiatheria              | -----                                                                         | -----       | -----                                                   | -----                                      | -                                   |
| Eutheria                    | -----                                                                         | -----       | -----                                                   | -----                                      | -                                   |
| Tarsius_syrichta            | -----                                                                         | -----       | -----                                                   | -----GAC                                   | AAGAAAGGTT 13                       |
| Muridae                     | ACACTAAATG CCGACCTCCT GTCTTTCCGT CAAAGGTTTC CTAGGANNAT AGTTGCTTCT GCAAAGAGTTG |             |                                                         |                                            | 1757                                |
| Gasterosteus_aculeatus      | AGTAGTGAGG CAGCCCAAGG TAAAGACCTT TAGCGGGCAA GGCAGTCAAG TNCAGGTTGN NTGACGANAN  |             |                                                         |                                            | 1415                                |
| Felis_silvestris            | -----                                                                         | -----       | -----                                                   | -----T                                     | GAGA-GACCC 10                       |
| Rattus                      | -----                                                                         | -----       | -----                                                   | -----                                      | -                                   |
| Papio_hamadryas             | GCAAGTACAC TCATAGAGCA AGTGACATCT GCCTGTAAGG TCTGTACAGCA GTTAAACGCT GGGGCTACCC |             |                                                         |                                            | 4717                                |
| Pan_troglodytes             | --AGCTGAAC CCAGAGATGA CGTTGCA-- --AG TCTGCCAGCA -----C AACGCTCCCC             |             |                                                         |                                            | 2600                                |
| Ailuropoda_melanoleuca      | -----                                                                         | -----       | -----                                                   | -----                                      | -                                   |
| Cavia_porcellus             | -----                                                                         | -----       | -----                                                   | TGTTATAGAC AGGTNATAGN CAAATTTTCAT          | 30                                  |
| Ictidomys_tridecemlineatus  | -----                                                                         | -----       | -----                                                   | -----                                      | -                                   |
| Canis                       | -----                                                                         | -----       | -----                                                   | -----                                      | -                                   |
| Felis_catus                 | -----                                                                         | -----       | -----                                                   | -----                                      | -                                   |
| Ochotona_princeps           | -----                                                                         | -----       | -----                                                   | -----                                      | -                                   |
| Cercopithecidae             | TTCCCCCATT TCCTGGCGGA GGGTTAGTGG ATCCCGTTCC CGCTGCCAAG CCCTTATCA GGCANCCAAG   |             |                                                         |                                            | 889                                 |
| Carnivora                   | -----                                                                         | -----       | -----                                                   | -----                                      | -                                   |
| Mus                         | AAAAGGGTGG ATACACCTAC TAAAAGCTCA GTTGCAAGAT ACTATGGATA CTGAGAGACG TGGTGAAGC   |             |                                                         |                                            | 943                                 |
| Mus_musculus                | -----                                                                         | -----       | -----                                                   | -----                                      | -                                   |
| Rattus_norvegicus           | -----                                                                         | -----       | -----                                                   | -----                                      | -                                   |
| Tursiops_truncatus          | -----                                                                         | -----       | -----CGC                                                | AGAAATCAAT CTGGGTGATT AAGAACTCTA           | 33                                  |
| Procapra_capensis           | -----                                                                         | -----       | -----                                                   | -----                                      | -                                   |
| Primates                    | CTGGCGGCC ATGAACAGAC TTTACGCCAA TTGCTTTGNC CCGCCACGCC CCCCTGTACC CATAANAACC   |             |                                                         |                                            | 95                                  |
| Echinops_telfairi           | -----                                                                         | -----       | -----                                                   | -----                                      | -                                   |
| Sorex_araneus               | -----                                                                         | -----       | -----                                                   | -----                                      | -                                   |
| Canidae                     | -----                                                                         | -----       | -----                                                   | -----TGATGTAG                              | GAACGAGTTA 18                       |
| Otolemur_garnettii          | -----                                                                         | -----       | -----                                                   | -----                                      | -                                   |
| Gallus                      | -----                                                                         | -----       | -----TG                                                 | AAGNGTGANA ATGGNCNCA GTAGNGNGAA            | 32                                  |
| Callithrix_jacchus          | -----                                                                         | -----       | -----                                                   | -----ATGTTG                                | 6                                   |
| Crocodylus_porosus          | -----                                                                         | -----       | -----                                                   | -----                                      | -                                   |
| Erinaceus_europaeus         | -----                                                                         | -----       | -----                                                   | -----                                      | -                                   |
| rnd-6_family-7426-LTR-ERV1  | TGTGTCTCTT CTCACTATCG AAGAGGGGAT TTTTGAGTCC AAAGCTACTG CTGGNGATAC TCATCTNGGA  |             |                                                         |                                            | 491                                 |
| Esox_lucius                 | -----                                                                         | -----       | -----                                                   | -----                                      | -                                   |
| Salmo_salar                 | CTTTGGGATG ATCATATGTA GATGATATGT TGAAGNTGTN TAAATCAAAG NAAAGATGTN AAATNGACAC  |             |                                                         |                                            | 97                                  |
| Didelphidae                 | -----                                                                         | -----TGGGAA | GAGANTTNTT CCAGACATGA GAANTNACAG NAAGGAACCTG NAAGATTCCC |                                            | 56                                  |
| Latimeria_chalumnae         | TTCTCCTTTA TTCATGATCA AAAAAATGCT TACAAAATTG CCTATAGAAG AAACCACCTT AAAATTTTTA  |             |                                                         |                                            | 965                                 |
| Monodelphis_domestica       | -----                                                                         | -----       | -----                                                   | -----                                      | -                                   |
| Macropus_eugenii            | -----                                                                         | -----       | -----                                                   | -----                                      | -                                   |
| Alligator_mississippiensis  | -----                                                                         | -----       | -----                                                   | -----                                      | -                                   |
| Chrysemys_picta_belli       | ACCTGCACCA GCGAATGTTA TTGCCAAAAG AAAGTGAAGT AGTGCGCCCG GCCCCAGGC CTGTGGCAAA   |             |                                                         |                                            | 2206                                |
| Danio_rerio                 | AAAAAAATAT TGTTAAATAT TTTATAAACT TTTGTATTTA TATANGTNNN NTTAGAAAAT TTTCATATA   |             |                                                         |                                            | 125                                 |
| Taeniopygia                 | -----                                                                         | -----       | -----                                                   | -----ATAAT                                 | ATAAAATAAT AATTATTTGA 26            |
| Dasyus_novemcinctus         | -----                                                                         | -----       | -----                                                   | -----                                      | -                                   |
| LTR_XT                      | -----                                                                         | -----       | -----                                                   | -----                                      | -                                   |
| Haplorrhini                 | TTTGGACTAA AGGACACCAA GGAGAGCTAA GCTTTGATCG AGAAGGAGCA AATCTAGGTA TTCCGTAAAT  |             |                                                         |                                            | 7324                                |
| Catarrhini                  | GCTGGAAAAA AGGGGAGCGT G-----TGA CTTAGGAAT CGACGGGGCC GGACTGGATC CTCGAGTAAA    |             |                                                         |                                            | 6491                                |
| Anolis_carolinensis         | -----                                                                         | -----       | -----                                                   | -----                                      | -                                   |
| Murine_leukemia_virus       | GCTGGCTGTG TCTGGTATCG GGA---CCCC CCTACTACGA AGGGGTTGCC GTCTAGGTA CCTACTCCAA   |             |                                                         |                                            | 6641                                |
| Phascolarctos_cinereus      | GCTGGCTCTG TCTAGCCCTC GGC---CCTC CTTATTACGA AGGAATCGCA ACTCCAGGC--CAAGTCAC    |             |                                                         |                                            | 6449                                |
| Estrildidae                 | -----                                                                         | -----       | -----                                                   | -----TA-A                                  | AAT-TAT--- TTACAGCAAA 19            |
| Xenopus_Silurana_tropicalis | TCCNNTGAA AGTATNNANA AGAATTNNTC NATAGATGAA TAAGNATA-N NNT-TATAGG TTATGATANA   |             |                                                         |                                            | 283                                 |
| I_XT                        | NTCATATCTN NCTGCCCTGT TNGAATTGNN AATANNATAG TCAANATATN AAT-TAA--- TTCACTAGA   |             |                                                         |                                            | 6894                                |
| Takifugu_rubripes           | TATNCNGGAG NGNAAAAGGA AAGNTTCANC CNTGTNTNC CCAATTGGCG GANATCNANN CTATGNNNNC   |             |                                                         |                                            | 163                                 |
| Bos_taurus                  | -----                                                                         | -----       | -----                                                   | -----                                      | -                                   |
| Homo_sapiens                | -----                                                                         | -----       | -----                                                   | -----                                      | -                                   |
| Microcebus_murinus          | -----                                                                         | -----       | -----                                                   | -----                                      | -                                   |
| Myotis_lucifugus            | -----                                                                         | -----       | -----                                                   | -----                                      | -                                   |
| Equus_caballus              | -----                                                                         | -----       | -----                                                   | -----                                      | -                                   |
| Tupaia_belangeri            | -----                                                                         | -----       | -----                                                   | -----                                      | -                                   |
| Loxodonta_africana          | -----                                                                         | -----       | -----                                                   | -----                                      | -                                   |
| Murinae                     | -----                                                                         | -----       | -----                                                   | -----                                      | -                                   |
| Canis_lupus_familiaris      | -----                                                                         | -----       | -----                                                   | -----                                      | -                                   |
| Sus_scrofa                  | -----                                                                         | -----       | -----                                                   | -----                                      | -                                   |
| Choloepus_hoffmanni         | -----                                                                         | -----       | -----                                                   | -----                                      | -                                   |
| Vicugna_pacos               | -----                                                                         | -----       | -----                                                   | -----                                      | -                                   |
| Gavialis_gangeticus         | -----                                                                         | -----       | -----                                                   | -----AACA                                  | TATNNTGACA TNGATCCTAC TGNAGCCTTA 35 |
| Mammalia                    | TGGGATAATA TTTGAAATAT ATTAATGTGC TTTTCCTTTT CTTTGTGACC TTCTCCCTC AGCGAGGCAT   |             |                                                         |                                            | 75                                  |
| Passeroidea                 | -----                                                                         | -----       | -----                                                   | -----                                      | -                                   |
| Takifugu                    | -----                                                                         | -----       | -----TGAAGAGA                                           | ATTGTGTTTA TCTTGTATC ATGTGTTNTA CCATATGT-- | 46                                  |
| Pteropus_vampyrus           | -----                                                                         | -----       | -----                                                   | -----                                      | -                                   |
| Ornithorhynchus             | TGCCTGGTGC ATATATTCTC ATGACCGTTA TAGCAGTCCC CTGTATCGTG ATTGCAGCGC GTCTTGATGC  |             |                                                         |                                            | 1517                                |
| Oryctolagus_cuniculus       | -----                                                                         | -----       | -----                                                   | -----                                      | -                                   |
| Gallus_gallus               | -----                                                                         | -----       | -----                                                   | -----                                      | -                                   |
| Hominidae                   | CNCNNNNNTC TNNCNNNNNT NNNNCNCTGC CNNNA TNNNN NNTNNTCNN NGC NNTTNGN CNNNNNNNNN |             |                                                         |                                            | 3685                                |
| Metatheria                  | -----                                                                         | -----       | -----                                                   | -----TGT                                   | GTGAATTTAA 13                       |
| Rodentia                    | TTACCTCCCC GTACCCGGCC TAACCCGGCC ATNGTTCTCC CTTTGCGGGA AGTTGCCGGG GTGGACGGCT  |             |                                                         |                                            | 1303                                |
| Monodelphis                 | CNNNNANANT GNANACNCCC TACTTAAAAG NTNNNNNNNG NNNNCTGNCC ATNNTTNGAN TNNANCNNNA  |             |                                                         |                                            | 176                                 |
| Consensus                   | -----                                                                         | -----       | -----                                                   | -----                                      | -                                   |
| Conservation                | 100%                                                                          | -----       | -----                                                   | -----                                      | 0%                                  |



|                             | 7,440      | 7,460       | 7,480      |            |            |            |             |            |    |
|-----------------------------|------------|-------------|------------|------------|------------|------------|-------------|------------|----|
| Dipodomys_ordii             | GG         | TCTGA       | ACTAG      | AATNACTNCA | TTTTGAGC   | NGNCTCCNTN | TTAGNGTTTN  | 52         |    |
| Laurasiatheria              |            |             |            |            |            |            | A-AACAAGGA  | 22         |    |
| Eutheria                    | TAAATC     | TTCTGCTNAG  | TAAAA      | TCAA       | TNGAGC     | TNT        | CTCCNCTT    | 56         |    |
| Tarsius_syrichta            | TNAAGANTT  | GNAATANCTT  | GTTTGATAAG | TAACTTCATN | TTTTTAAAAA | TCGAC-AATC | TTATCTGTNT  | 82         |    |
| Muridae                     | CAGACCTTGG | GCTACAGAA   | GTCGGCTAAG | AAAGCCCAAC | TTTATANATC | AGAGGCTACC | TATCTTGCT   | 1827       |    |
| Gasterosteus_aculeatus      | GTNTNTTCT  | TNGGANGAAN  | GCTNTCGGTG | ANGNNTNAAN | NCTNTCACC  | GAACACANGT | NTNTCAGTTT  | 1485       |    |
| Felis_silvestris            | CTGGCTTAGC | TTAATAAAAC  | ACCCCCACCC | TATCTTCGGC | TTTGTAACCG | CCTCACITGC | AG--AGTT    | 77         |    |
| Rattus                      |            |             |            |            |            | AGAATNAACT | TCACTGAGAT  | 20         |    |
| Papio_hamadryas             | GAGTGCCAGC | AGGGAAACGG  | ACTCGTGGTA | ACCGCCCGGG | AGTCTATTGG | GAATAGACT  | TCACTGAAGT  | 4787       |    |
| Pan_troglodytes             | CAGCGCAGGA | AAGGTGGGA   | CGCCG-     |            | GATCTACTGG | GAAGTAGATT | TTACTGAAAT  | 2655       |    |
| Ailuropoda_melanoleuca      |            |             |            |            |            |            | ATGNNAAGN   | 12         |    |
| Cavia_porcellus             | TCCAGTCAGA | NAGAGAATTG  | ANTCTCGAGA | NAGACNNTCC | NACCTCAGCT | ATCAGNAAAG | AGNAGAAGGA  | 100        |    |
| Ictidomys_tridecemlineatus  | TAAAGTCAGA | ATTAATAATTT | ACACAAGTTG | TTAACAA--A | TTCTTTGTTT | ANNAGTAAAA | TATAGAA--A  | 75         |    |
| Canis                       |            |             |            |            |            |            | AATCCCC--T  | 33         |    |
| Felis_catus                 |            |             |            |            |            |            | AAGCTAGANT  | 11         |    |
| Ochotona_princeps           |            |             |            |            |            |            | CNACTGCNTT  | 38         |    |
| Cercopithecidae             | GAACTACACC | CCTTANAGCG  | GTCCGACCCA | GCATGAGTTG | GCTTTTGAGN | AGNTTCAAGA | CTTCCNNTC   | 959        |    |
| Carnivora                   |            |             |            |            |            |            | GAAAGAAAGC  | 20         |    |
| Mus                         | GAAAACGTGA | CAGATCCAC   | CCCACACGCA | GTAAGAGAGT | TCCTGGGAAN | TGCANGGNT  | TNNANNCTCT  | 1013       |    |
| Mus_musculus                |            |             |            |            |            |            | ATC-AACNTT  | 53         |    |
| Rattus_norvegicus           |            |             |            |            |            |            | AGC-ACTGAT  | 11         |    |
| Tursiops_truncatus          | TTATAACTAT | TGTTANAAG   | CAACACCCA  | CCGACTGANT | CCATGGGATT | TAAANGCTGG | GCCTAACANT  | 103        |    |
| Procavia_capensis           |            |             |            |            |            |            | NCGAGATAAT  | 28         |    |
| Primates                    | ANACTCCAAA | CCCAAGNNTA  | ANACCAGCCG | CAGAAANGTN | CCATTAGNAA | TNTACGTTAA | TGCGTTCGTG  | 165        |    |
| Echinops_telfairi           |            |             |            |            |            |            | TCC-GTTACT  | 41         |    |
| Sorex_araneus               |            |             |            |            |            |            | TNCAGNTAAT  | 46         |    |
| Canidae                     | GGGGCAGNCG | GGGCTAGGCA  | GGGAAAGNTA | NGGAAAGGC  | CNCNGAGTCA | GGCTCCNACC | CATCCAAGA   | 88         |    |
| Otomur_garnettii            |            |             |            |            |            |            |             | -          |    |
| Gallus                      | NGGACCCGCA | GNAACAAANG  | GCAANNATG  | TGACNGATTA | GNNATAGGGG | CGTACAGAGN | NNNCTNAGGT  | 102        |    |
| Callithrix_jacchus          | TATCAGGCGN | GGAATAGCNA  | GNCANCATCN | AGANAAGAGG | GTGCCAAAT  | NCAGGCTCNT | TGTTTCCGGG  | 76         |    |
| Crocodylus_porosus          | CACGGNAATC | AAGAGCCCAA  | AACCTCAGGT | CTTGACTGTA | TACCTGTCTT | GGAGAAGCNA | AGCCCTAAC   | 80         |    |
| Erinaceus_europaeus         |            |             |            |            |            |            | TNAGATGTA-  | 60         |    |
| rnd-6_family-7426-LTR-ERV1  | GGTGAGGATT | TTGACAATAG  | GATGGTGAAT | CGTTTCGTNA | NGGA-GTTT  | AGAGGAAGCA | TAAGAAGGAT  | 560        |    |
| Esox_lucius                 |            |             |            |            |            |            | TATATAAAT   | 59         |    |
| Salmo_salar                 | TAGAGCANTG | TTAATNTTAA  | TNNCATGAAA | AAGNTCANAA | AGTT-TCACN | TAGNAAGNTA | NAGCTAGNNT  | 166        |    |
| Didelphidae                 | CTGGAGACCT | NGGAGAAGAG  | NTTCCNAAAN | GACTATGACA | GGAG-GGACA | AGACATCACA | GAAGCTGNAT  | 125        |    |
| Latimeria_chalumnae         | TAAATTAAT  | TTGTGACAAA  | TGTAATTAAT | TTTTGAAAAA | ATAA-AATCA | GCACACAATA | AGTTTGGNNT  | 1034       |    |
| Monodelphis_domestica       |            |             |            |            |            |            | AGTTTATCC-  | 58         |    |
| Macropus_eugenii            |            |             |            |            |            |            | NGCCNCTCT-  | 64         |    |
| Alligator_mississippiensis  | TGATTTTTAA | TCCAATTGGT  | ACAAATA--- | ----       | TTCTT      | GTATTNATAG | NTTCTGGATG  | 71         |    |
| Chrysemys_picta_belli       | TGATAT---  | TCACAAGGGT  | ACANATACTT | GTTGGTTTTA | GTNGATATAT | TNACNGGATG | GCTCGAAGCC  | 2273       |    |
| Danio_rerio                 | TTNTACAAA  | GTNAAAATGN  | AATTTCAATA | TATTAANATA | ATAANAAAAT | AT-GTAAAAA | TATATAAAT   | 194        |    |
| Taeniopygia                 | TTGTTTTAAT | TAGCAAAAGC  | AGTTTTAGTG | TGAGAAAA-A | AAANATNAAC | NG-ATAATTN | CNTAGAAGGA  | 94         |    |
| Dasyus_novemcinctus         |            |             |            |            |            |            | AATATAGGCC  | 55         |    |
| LTR_XT                      |            |             |            |            |            |            | ATNTNANN-   | 32         |    |
| Haplorrhini                 | CATTATTA   | AAGACTCAAC  | GAGCTAAAGT | TCAAGTCAGT | CCAATGTCAC | AGTTCAGATT | TTTCAAACTC  | 7394       |    |
| Catarrhini                  | TATCTT---  | GGTTCGAG    | GAG---AAGT | TTA---GAAA | C-ACTCTCCT | GAGCCAG-TG | TTTTCAAA-CT | 6546       |    |
| Anolis_carolinensis         |            |             |            |            |            |            |             | 1184       |    |
| Murine_leukemia_virus       | CCATAC---  | CTCTGCC     | CCGGCTAACT | GCTCCGTGGC | CTCCCAACAC | AAGCTGACCC | TGTCGGAAGT  | 6704       |    |
| Phascogaster_cinereus       |            |             |            |            |            |            | TCACTGAAGT  | 6512       |    |
| Estrildidae                 | TT-TG---   | ATGGGTTAGG  | ATGTTAGGTT | ATATATTTAG | -CANGAAACT | GTA---CTG  | GTTTAGTG    | 78         |    |
| Xenopus_Silurana_tropicalis | ATATA---   | ACATCTTATA  | AGTTTTNTT  | AAATNTGTAN | ATGATAAAT  | TTA---ATT  | NANGAAGATG  | 344        |    |
| I_XT                        | TAANGG---  | ATGGTANAAT  | ANNTTNAACT | ATAAINTCCA | NCAATANANT | NANTA-AANN | ATTCAGNCTN  | 6959       |    |
| Takifugu_rubripes           | NNNTTA---  | CTATTTTGTG  | GNCTNCTATA | GGGTGCAAT  | NTNTGCCATN | GTGTATGNTT | ACGGTGNNTN  | 229        |    |
| Bos_taurus                  | -----      | AAAA        | GAAATATAGT | TGACCGAGGG | ACAGACCCCT | CGTTAAATTC | GAATCATCA   | ACGGATATAT | 65 |
| Homo_sapiens                | -----      | -----       | T          | AAAACCACTA | AATTAATAAC | AATTAACCTC | TTTCTAAAA   | GATAGTA-AC | 50 |
| Microcebus_murinus          | -----      | -----       | -----      | -----      | -----      | -----      | NGTCCANAT   | 26         |    |
| Myotis_lucifugus            | -----      | -----       | -----      | -----      | -----      | -----      | TATAGCAACC  | 24         |    |
| Equus_caballus              | -----      | -----       | -----      | -----      | -----      | -----      | TNTAATATTC  | 42         |    |
| Tupaia_belangeri            | -----      | -----       | -----      | -----      | -----      | -----      | ATTGACTCTT  | 47         |    |
| Loxodonta_africana          | -----      | -----       | -----      | -----      | -----      | -----      | GGTCCCGNCC  | 40         |    |
| Murinae                     | -----      | -----       | -----      | -----      | -----      | -----      | TNTAANANTC  | 55         |    |
| Canis_lupus_familiaris      | -----      | -----       | -----      | -----      | -----      | -----      | TAAACAGNNTC | 50         |    |
| Sus_scrofa                  | -----      | -----       | -----      | -----      | -----      | -----      | TATCATCGCT  | 32         |    |
| Choloepus_hoffmanni         | -----      | -----       | -----      | -----      | -----      | -----      | AATAAAAGGG  | 40         |    |
| Vicugna_pacos               | -----      | -----       | -----      | -----      | -----      | -----      | CATCAATACA  | 38         |    |
| Gavialis_gangeticus         | TANTTTNCNT | AAGTTGATCT  | GTGTNATGN- | -ATTNTAATC | NGNACANATA | AGCCCTNACA | TTCTGTNTCT  | 103        |    |
| Mammalia                    | CCATTGCCTC | GGGAGGATTA  | GGATTGTTAC | AGCAGGAATG | CAAAGAGAAA | GAAGTTAATA | TTTCTGTTCT  | 145        |    |
| Passeroidea                 | TATTTTATAT | TGTAAGAAAA  | AANCNNGCA- | -AGTCGGAGC | CGGGAGTTGC | NT--CACNTA | TNTTGAACC   | 116        |    |
| Takifugu                    | TTCTGTTTTT | TGTTANANTT  | ANNTTAGAAA | -GTTAGGGAT | NGTANAATCN | TTAGNAAGTG | TAATAAAGAT  | 114        |    |
| Pteropus_vampyrus           | -----      | -----       | -----      | -----      | -----      | -----      | TACNAGNAGAT | 44         |    |
| Ornithorhynchus             | CAGGACTTTC | TGGGCACCGG  | GTTTACCGCC | CCGTCGAAGG | GCCACACAGG | CATTNTCCGN | TTCCCGTNTG  | 1587       |    |
| Oryctolagus_cuniculus       | -----      | -----       | -----      | -----      | -----      | -----      | TTTAGCCGAA  | 35         |    |
| Gallus_gallus               | -----      | -----       | -----      | -----      | -----      | -----      | TTTAAACCACA | 28         |    |
| Hominidae                   | NATATCNENN | TNNNNNCCNN  | NNNNNCTNT  | AACCCTGCNA | CACNTNNNNC | CNTNNGNNCC | GTCTNANCCC  | 3755       |    |
| Metatheria                  | TATA---    | AA          | TGTACCCCT  | CTTCTCTTTT | AGAAAGG-AA | AGTTTTGAAA | ATCCATTTCCG | GTCCTAGCCC | 78 |
| Rodentia                    | TAGGGTA-CA | TGCTACATGT  | CCCTTCCATT | AAGCGAA-CT | CTCTTAGAGA | AGAGANTGGG | GTCCTACACT  | 1371       |    |
| Monodelphis                 | ANGGTGTA   | NANNNNANTC  | NNNNTTGNGT | GNGNNAANGN | TNTGCTANNN | ACGTNNNNNN | TNNTNGGTTN  | 246        |    |
| Consensus                   | -----      | -----       | -----      | -----      | -----      | -----      | TATCAAANCT  |            |    |

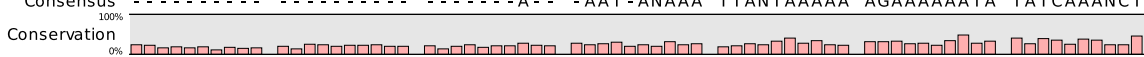





|                             | 7,580          | 7,600           | 7,620          |                 |                 |                |                |      |
|-----------------------------|----------------|-----------------|----------------|-----------------|-----------------|----------------|----------------|------|
| Dipodomys_ordii             | NC - - - ACNGT | CANATCANGG      | TTAANCCAGN     | AACCCTNGTG      | CTNGACNNGN      | TNGGAACCC      | CANAGACNG -    | 182  |
| Laurasiatheria              | CT - - - GTAAA | TGCCTCAAGG      | TTAAGAAAATC    | AAAACCTAAG      | GACAACCAAT      | CACAAACAGC     | CAA - - CTAG - | 149  |
| Eutheria                    | AC - - - CTAAC | TCAAAGTATT      | CTCGTAACCA     | ANAGCTACCT      | CTCGAGCCAA      | CCACAATCCT     | GCGCTTTAA -    | 180  |
| Tarsius_syrichtha           | ACATCCTTGC     | TGCAAGAAATC     | CTGCTGACTG     | TTTGCAACTC      | CTGTAGCCA -     | TGAATTCCTC     | GTAATAATTA -   | 212  |
| Muridae                     | NC - - CAANGA  | NNNNNGNANA      | NNNNNGANN      | NNCCNNNGNA      | CNGNNNGNAN      | NNCNGCNNCT     | GNATACCGA -    | 1961 |
| Gasterosteus_aculeatus      | TN - - - ATTCC | NAACTANTCA      | ACT - CANTCA   | ACTTCTGTGN      | NNNTTGNATG      | ATNAAAAATC     | GAACANNNNA     | 1616 |
| Felis_silvestris            | AG - - - GTTGC | TACATAAAAT      | AC - - CGCTTT  | GCTCTGCTGT      | CTGTAACCTT      | CTTACGCGCC     | CACCCCTA - -   | 205  |
| Rattus                      | ANCNNTCCTC     | ACAAAGCAAG      | AGACGGCCTC     | NGCAGTCACC      | AAGAAGAAAN      | TGGAAGAAAT     | CTTCCCAGN      | 154  |
| Papio_hamadryas             | AGCCTTTCCC     | ACCCGGCAAG      | AAACGGCACA     | CATAGTAGCC      | AAGAAGATCC      | TAGAAGAAAT     | CTTTCTTAGA     | 4923 |
| Pan_troglodytes             | AGC - - TTCCC  | ACC - - - - AG  | AAACTGC - CA   | TGTAG - - - C   | AAGAAAAAT - T   | TGGAAGAA - -   | - TTTCCCAGG    | 2757 |
| Ailuropoda_melanoleuca      | ACCANNNTCC     | ANCTAATCAC      | AAATCATTCT     | NGAGG - - - N   | ATGAAATTNC      | CANACATCAC     | AACCGTTAGC     | 135  |
| Cavia_porcellus             | GGCNANCNNA     | TAANGGTTCT      | GTATTATGTC     | AGGATC - - AA   | GCTNAG - - CA   | GAANNAGGT      | ACCNTACAAA     | 231  |
| Ictidomys_tridecemlineatus  | GACCACATAA     | GAACC - TTCT    | TAGTTAAGCA     | CGTCGC - - CT   | CCCAGGGCCC      | TAAACAAATC     | ACTTTGAATG     | 204  |
| Canis                       | GGCNACNNNA     | CCTGCTTANN      | NNTTAAANGTC    | CTAGCC - - CG   | CCCCAGANAA      | CCANCAGAAC     | ACACNCNAAG     | 166  |
| Felis_catus                 | GCTACCTNCA     | CTGANA - - CT   | CACACNNCCAC    | CTACNC - - CT   | GGGTGTGNGA      | GACCAGGCNT     | CN - - - CAGG  | 132  |
| Ochotona_princeps           | GGCAAGGGNC     | NTGACN - - CG   | NNAAGCAAGC     | CCCNGC - - TG   | CGGANGGCAG      | TCCCTGGCGT     | NTGAN - CAGA   | 167  |
| Cercopithecidae             | CGGGTNGCCA     | ANGGCGTCTC      | AGCNCAGCAC     | NTAGN - - CC    | NTGACAGAA       | NCTGTGGCCT     | AACTCTCAAA     | 1093 |
| Carnivora                   | AAATAC - - - T | TGAGACAGGC      | AGAGTAT - AA   | CATTCC - - TC   | CAGGAAGCTC      | CCAATGTCT      | TAATGTTAAT     | 136  |
| Mus                         | AANGGCAGTT     | CCTGGACCAC      | AGAACCACCAG    | AAAGCC - - TT   | TGAANNNTC       | ANANAGGCC      | TACTGNCGGC     | 1135 |
| Mus_musculus                | AAACTAATAT     | TCCNCATAAC      | CGTTTTGCGA     | AAAGTC - - CT   | CAG - - AACCN   | GCTCANANAG     | TCCTGAGACA     | 169  |
| Rattus_norvegicus           | CCGNNAAGCT     | CNACAAACCTC     | CGAGTAAACGA    | GATGCC - - CN   | CAACTGACAT      | AACCAAANTA     | GTCGTGACAAA    | 128  |
| Tursiops_truncatus          | CCNCNCTTNN     | TTCAGGAAC       | AAGGTCCNGCA    | ANCAAA - - AA   | CTTA - GNGAC    | AAAANAGCAA     | TTTCAGGACA     | 225  |
| Procapra_capensis           | GCTGTCAATC     | NCAATGTGNG      | ATNCCACTT      | TACGCA - - CC   | ATACTTCCCC      | AATAATGACC     | NTCCGGGGNA     | 144  |
| Primates                    | ACCAGCACTN     | TCNANG - GTG    | CAGTCATNGC     | GGAGCC - - CG   | GCCGGTATAC      | AGCTTAGCTT     | CAGGGGAAGA     | 298  |
| Echinops_telfairi           | TGNGGCTANC     | CACACCCGGG      | ACAGGTGAGC     | GANACA - - NC   | TGGACTGGCC      | CACCTAGGCC     | CAGGACCACT     | 165  |
| Sorex_araneus               | AAANAACATC     | TNCNNNGATG      | ACATGN - ACC   | CACCTCA - - GG  | TAANTTG - - C   | TANGAGGACA     | NTGNTNCAAG     | 176  |
| Canidae                     | GAGNATCNCC     | CTNTAATNGC      | TACTAAGTAA     | N - - - - CACAG | AAATCCCAGA      | TGTAGAGAAA     | TANNATGGAG     | 218  |
| Otomur_garmettii            | AGACANCTCC     | CCGNAATAA       | NCCCCA - CAA   | C - - - CTNAN   | CCCTTNCAA       | CAACACAGTG     | CTTTAC - - -   | 93   |
| Gallus                      | GATNAAAGCT     | NTGAAGTNN       | AGATTTGAGA     | CGCAGNCCGN      | GAACANCTNG      | CAAGAAGGTG     | ATTGGCNGTA     | 238  |
| Callithrix_jacchus          | TGNCTAA - - A  | AGCTCTNTAA      | CNANATCCTG     | ATCAGGTAAAC     | CNAATCGAAG      | ATGAAGGGCT     | CCAGGGTAAN     | 207  |
| Crocodylus_porosus          | TCTTTNA - - A  | ACCAGCCNTA      | TCACANGCCG     | AT - GCNTTAT    | TANTTCCCTGA     | TATTTTAGCC     | TTCC - - TAGC  | 202  |
| Erinaceus_europaeus         | ACAATCA - CA   | GCNGNTACAG      | GTGNNCNGA      | TGCAGNTTIN      | ACACGAGAGA      | NTAAAGTGTA     | GCGAATCAA      | 182  |
| rnd-6_family-7426-LTR-ERV1  | NCTTTTATCC     | ACCCTCAGA       | CNACCGTTGA     | AAATCGATTCC     | TTGTATGAGG      | GNATTGACTT     | CTACTCNACC     | 693  |
| Esox_lucius                 | TATANGTTTA     | TNCNGAAACC      | ATAAAATCTG     | TTATAAATNA      | TCAGTGTAACA     | CTG - - TAGAT  | - TGTCAGG -    | 184  |
| Salmo_salar                 | AAGCTATTCA     | AACTGCAANG      | AAANCNNTTA     | CTATGAAAGA      | ANTGNTNCTN      | TGTATTGGTA     | - TGCCAAGT -   | 304  |
| Didelphidae                 | AGCATGNNTA     | CGTAGCTAAA      | NGTNGAGGTT     | ATCTTAGNAN      | TAAGGNTTAG      | CTGAGAAGAA     | - GNNTTATCT    | 264  |
| Latimeria_chalumnae         | AATTNANANA     | AAGGAATGCN      | ANNANTCCTT     | ATGAGCAAAA      | GNNNTNATTG      | CAATNNAAAA     | - - GCATANCT   | 1166 |
| Monodelphis_domestica       | AGTGAATAAT     | AAGT - - TANA   | AGAGTCACT      | GTTACATTTGA     | GATNTATCTA      | CTATCTATCT     | CTGCTGAAGT     | 183  |
| Macropus_eugenii            | NCTTCCCTGG     | AATGNCCTG       | AATGTGCCAA     | ACTAAGAAATC     | NGCACTCCCT      | NGNTNANANT     | CACANCAATCA    | 196  |
| Alligator_mississippiensis  | CCCAGATTTG     | GNATGCCACA      | NACNATAGAC     | - - - ATTGATNG  | AGGAACACAT      | TTTACAGGAA     | AAATAGTNCA     | 195  |
| Chrysemys_picta_belli       | CCNCNCNCCG     | GANTCCCN        | GTGAATNTAA     | - - - ACTGACCN  | CGGAACACAC      | TTACANATCT     | AAGTTGTCTCA    | 2401 |
| Danio_rerio                 | TTTTAAAAAG     | ATATAT - AAA    | TGTGTGATAA     | CAATTGAATA      | AAAATGTCTT      | ANAAAAATG      | AATTTCCNGCT    | 323  |
| Taeniopygia                 | TTCAACTATA     | A - GTAG - ATA  | GGCCNCAAGG     | TAATGAAAGA      | GNA - - - - -   | GGNAGATCTG     | AAT - - - - -  | 209  |
| Dasybus_novemcinctus        | TTTACCACGA     | AGGCAT - TTG    | GGCGATAATA     | - ATGTAAGCT     | TCANCTAATC      | TGGGAAGCNG     | CAG - - - - -  | 171  |
| LTR_XT                      | TTTTTCTATC     | TNTNTCTATA      | TNTTTAATA      | TNGNAGNANT      | TNAAATATGT      | TANAGAATCC     | AGNGCTA - - -  | 157  |
| Haplorhini                  | ATTTCCTCAG     | CTAGCTGAAA      | GTATTGCTAC     | TAATCTTGGA      | GTCACCTCAT      | GTTATGTATG     | TGGAGGTACC     | 7529 |
| Catarrhini                  | GTTTTTGCAA     | TTAGCCGAGC      | GTGTAGCCCA     | GTCCTCAAT       | GTCACCTCAT      | GTTATGTATG     | TGGAGGAATC     | 6672 |
| Anolis_carolinensis         | - - - - -      | - - - - -       | - - - - -      | - - - - -       | - - - - -       | - - - - -      | - - - - -      | 1184 |
| Murine_leukemia_virus       | TGTAATACCA     | C - - - - CCAGA | AGACGAGCGA     | CGGTCTCT - -    | ACTATCTGGC      | CGCTCCCGCC     | GGGACCATCT     | 6820 |
| Phascolarctos_cinereus      | TGCAACCTGA     | CTATACCCTT      | AAACGCCTCA     | CATACCTACA      | AGTACCTCCT      | CCCTCCCAAC     | CGCAGCTGGT     | 6634 |
| Estrilidae                  | TCTNCCAGA      | TNAGGTAAAC      | AAAA - - - - - | CAATCTNCC       | TGGAGACCAA      | AGGACAAAAA     | AAACAANCA -    | 176  |
| Xenopus_Silurana_tropicalis | GATTTCANAT     | NATNCCNAAT      | ANAN - - - - - | AGACTGTGAN      | AGNATAAAG       | GAATCATATA     | ANCCAAATTA     | 455  |
| I_XT                        | CNANNTGGAG     | TATACANTC       | AGANGTCAGA     | ATANTTGTNC      | CTAAATTTGNG     | GACTCANACT     | GACCCANTTN     | 7079 |
| Takifugu_rubripes           | GC - ANANGNG   | TANTACAAGG      | ACAN - - - - - | GGGGTGTCTN      | AATTNATCAA      | GGCANCTGCC     | GTTNAAAAAA     | 342  |
| Bos_taurus                  | TTGCCAAATG     | CGAGA - - - -   | - - - - -      | CGCCAAATGA      | TCAAATTTGG      | AAACNA - - AA  | AGAATAANAA     | 179  |
| Homo_sapiens                | CCCTTANACA     | TTACT - - - - - | - - - - -      | AGCTCTAC - A    | TACAATTTCTC     | AAATCA - - AA  | AAACTAAAAA     | 164  |
| Microcebus_murinus          | GCT - - - - -  | CNCG - - - - -  | - - - - -      | - - - - -       | - - - - -       | - - - - -      | - - - - -      | 125  |
| Myotis_lucifugus            | ACAATAATGG     | CTAGG - - - -   | - - - - -      | TTTATTAAAG      | TGCATTAAGG      | CNACCCACCC     | AAACT - - TA   | 136  |
| Equus_caballus              | - - - GAGAAAG  | NCTTT - - - -   | - - - - -      | TAANTCT - TGA   | TCAACAAACT      | CCACAA - - - C | CACATACATA     | 152  |
| Tupaia_belangeri            | TTNAGAAAAG     | TCCANTACCC      | TGAACAAAAG     | CAGGCCATGA      | GTAACCTGAT      | ACATNA - TN    | NATTTCTGTA     | 169  |
| Loxodonta_africana          | CTGNNAGCAG     | CCCTT - - - -   | - - - - -      | CAGAAC - NGA    | NGCNCATGCT      | AGATTA - - NG  | CA TNGCCAC     | 152  |
| Murinae                     | TGGCCNANAG     | NANAT - - - CG  | AAACNTATTT     | ACCNNNANAA      | NANTGACTCC      | ACNNTC - NN    | GACNTACAACT    | 181  |
| Canis_lupus_familiaris      | TCNCGTGA       | GNACTAAAAC      | NNCNTGAGCT     | TTTTACTAAA      | NACCTNCTCC      | ACAGGN - GA    | AACCTGATTT     | 180  |
| Sus_scrofa                  | - CNGCAAAGG    | AGCTTANAGA      | GACATGAG - -   | - - - - -       | - - - - -       | ACCCCGAAC      | ATTGCC - - GA  | 142  |
| Choloepus_hoffmanni         | ACTCCTAGTC     | ACCTCCTAAT      | - - - CTGATAT  | T - - - - - AA  | AG - ACTAGCC    | AAAGAT - - GA  | AATANCTGA -    | 150  |
| Vicugna_pacos               | ACNCCAAGCT     | GATTTTAAAG      | GNATTAATAAC    | T - - - - - GG  | GGCGTTCTCC      | ACAGNCTGAA     | AATTAACNGG     | 157  |
| Gavialis_gangeticus         | TNTGANCCAN     | TCANCAATTN      | TTTTAAAAAG     | TNAANAAGAG      | AATNAGATGC      | NGTCCANATA     | AAACGT - GAT   | 229  |
| Mammalia                    | GGANTTTCTA     | AANNCTTTAG      | CTCNCCTTTAG    | CATATCA - AG    | AGCCAGGCTT      | GGNNGACNNA     | GNNCNTAGAG     | 280  |
| Passeroidea                 | GTGTTTTGNC     | GAGNTGATAC      | GAGGAANNCN     | CAGGNGATGA      | TCANNCNNT       | AACTACCCAN     | GACTG - - AGA  | 248  |
| Takifugu                    | TCAGN - - CTG  | GAAGTGTAA       | ACNCCCATCG     | TAAAACGNGA      | CAGCATAGT       | TACTGGTGT      | GATAA - - GTT  | 242  |
| Pteropus_vampyrus           | CCTGTGCCTG     | AAGTTCANGA      | ATCTTAATTA     | TGACTAACGA      | ATTNAGGATC      | AGCCACGCA      | CACATA - - GA  | 168  |
| Ornithorhynchus             | GCCNCNCTNC     | TGGCCCTGG       | GNCGGTAGAT     | CCGNNGGTTN      | NGGCTGA - - G   | GNACCACATG     | A - TTGTGTT    | 1723 |
| Oryctolagus_cuniculus       | AGCTTAGGAA     | TAG - - CNTGG   | GA - GGGATGT   | TNCTCTATTT      | TCACTCA - - G   | CAANCCGTTN     | A - TTCTGNA    | 166  |
| Gallus_gallus               | GTCAACCCAC     | CGATCCAATG      | AGCNGTACCC     | AACTCGCNT       | CN - CTCA - - N | NGGTANGTTA     | AGTNGANAAN     | 163  |
| Hominidae                   | CGNCCNNGA      | NNNNNNCTAA      | TCCTGNNNG      | ACTCTGNNNG      | NNGANGGCNN      | CNNANNCCNN     | ANCCNNNNCN     | 3895 |
| Metatheria                  | GNCAAGNNG      | CNTGNCNCT       | GNCNCCNNGN     | ANNCCNNNGN      | NCCGGAANAC      | NGNCTNNA       | CNCAGCNA       | 216  |
| Rodentia                    | TTTTATATGAT    | CCTCACCAAC      | AATCTTCTCC     | CTGAGGAGCG      | CAGGCGAGTC      | TGGGANCAGG     | CTAGGGCACA     | 1511 |
| Monodelphis                 | ANNNTNNNG      | NAGNCNCCG       | AAGTNNCCNN     | NANNNNAGNN      | TCTNNNN - AN    | NNNNNTTNA      | NCNTNNNGAG     | 385  |
| Consensus                   | ACTATAATAA     | TAATACAAAG      | AAACTAACAA     | NAAACCA - CA    | CAGAAGACAC      | AAAAAAGATA     | AACTGCCAAA     |      |

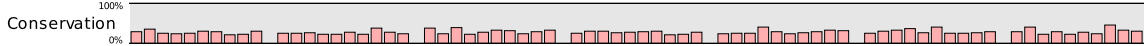

|                             | 7,640             | 7,660            | 7,680             | 7,700           |                  |                    |                   |      |
|-----------------------------|-------------------|------------------|-------------------|-----------------|------------------|--------------------|-------------------|------|
| Dipodomys_ordii             | -GATACANGN        | GN - - - TGNC    | CNTGCTNGCC        | AATGANCACT      | CAATTAAACT       | GNGTCTTTNC         | CACCCACTAC        | 247  |
| Laurasiatheria              | -GCTTTCCCA        | AA - - - TAAG    | GCAAATGCTT        | AAGCTATAGC      | CAATCAAATA       | ATTTCTTGGC         | T - - TTGCTTC     | 212  |
| Eutheria                    | -C-CAATCAC        | AA - - - NCAG    | CCAACT - - - G    | CTCCATGACT      | NTTCAAGAAA       | TTTCTCTTTC         | ACATGTCCAA        | 241  |
| Tarsius_syrichta            | - - - TATGCTC     | TN - - - TTAA    | CCGA - - - - - A  | ATCTGATAGT      | TTNCCAAGTA       | ATTCNTTCCC         | AC - TTTNTAN      | 269  |
| Muridae                     | -AGNNTTCGG        | AA - - - ATNN    | CNNGNCCNGT        | NTNCANNNNC      | ANNNNNNAGG       | GCNCTNANN          | CN - ANNANNNGG    | 2026 |
| Gasterosteus_aculeatus      | GGCNNATCTC        | AAGGTCCCTG       | CANNNTCNCA        | AGCTTTCANN      | GACTNAAAGGA      | NGCTTTGNCC         | CATGCAGCGA        | 1686 |
| Felis_silvestris            | -GCCGTTCCG        | AA - - - CCC     | CGGGCTCCAA        | G - - - TTGCATC | AGCCAAAGGA       | AACTTCATTT         | - - - - - - - - - | 257  |
| Rattus                      | TTTGGAGTGC        | CCAAGGTAAT       | CGA - - - AGAT    | AAGGGCCCTA      | GCTTCGTGCG       | CCAGGTAAGC         | CAGGGTGTGG        | 221  |
| Papio_hamadryas             | TTTGGAGTTC        | CCAAGGTAAT       | TGGGTCCAGC        | AACGGGCCGG      | CCTTCGTGTC       | CCAGGTAAGT         | CAGGGGCTAG        | 4993 |
| Pan_troglodytes             | TTGG - - - TC     | CCCAGAT - - -    | -GGTCAGAT         | AATGGGCCG -     | -CTTCGT - - C    | CTAGGTAAGT         | CAGG - - - TTG    | 2812 |
| Ailuropoda_melanoleuca      | CAGAAGNAGT        | ANAANTCCC        | TTNANCAGAC        | ACATTGNAT -     | -GNTTAGATA       | CCGCTTAGAC         | CTGAAGGAAA        | 203  |
| Cavia_porcellus             | NGNGTCCGG -       | CACNCCAA - -     | -AGACNGNNN        | AAGACCT - - C   | CGATCC - CCC     | TGGTTACCCA         | ACNNNTGA - C      | 293  |
| Ictidomys_tridecemlineatus  | TTGTAACCT -       | CCTTGNAN - -     | -TGACTAATC        | ACNGTNTGCC      | CAACTTGTTC       | CCGCCATGAA         | TGTGCTAATC        | 270  |
| Canis                       | CNGAGATCG -       | GNNAGCTG - -     | -AAATGGCAT        | TANGTCT - - C   | TAANTA - - -     | CAGTGAGAGG         | NCNGCTCA - A      | 225  |
| Felis_catus                 | AACNATTC -        | CNGGACAA - -     | -AGCCGAANA        | NGGGNCNCAA      | CGTTTCCN - A     | GNCTTATGGC         | TA - - AACANA     | 195  |
| Ochotona_princeps           | AACATAGTC -       | CCCNA - - - -    | - - - GTCACGAG    | CANTATATGT      | CGTCTTTATA       | GTNTGNTGGC         | AT - - AGGACA     | 227  |
| Cercopithecidae             | AAAGCTAGA -       | NCCAA - - - -    | -GGNTGANGG        | CTGGCCCCCT      | TGTCTNCGNA       | TNATCGNGCC         | CACCNNTA          | 1157 |
| Carnivora                   | - - - - - - - -   | GCCTTGCT - -     | -AGAGGAAA         | AACAACCTTA      | GCTTGACAA -      | -TAGCNAGGC         | CTCCAGNATC        | 191  |
| Mus                         | CCAGGCNTTG        | GCCTTGCC - -     | -AGACCTAAN        | TAAANCTTTC      | ACCTTATACG       | TTGNTGAGAN         | CTGNNGTNGC        | 1202 |
| Mus_musculus                | TCCCTAGCT -       | -GGATGTA - -     | -ATACTTGTAT       | GACCTNTNAT      | CATTCTCN - -     | -TG - - ACGTT      | TGAATAGACC        | 229  |
| Rattus_norvegicus           | GGCTTCCC - -      | - - - ATGCC - -  | -ACAGN - GGC      | CTCCTTTCAA      | GACCCAAA - -     | -TA - - ATCCT      | CATTGAGATC        | 184  |
| Tursiops_truncatus          | CGNGGGCC -        | -AAGAACC - -     | -CAGCAACCT        | GACNCNTGT       | AACCNNAT - -     | -NA - - ACAAC      | CANANAGNAC        | 285  |
| Procavia_capensis           | CCCCAANTC -       | -TCAGGCT - -     | -CATCCCGT         | NACCTGTTC       | TACCTANA - -     | -GACCATACC         | CCNCGCNAT         | 205  |
| Primates                    | TCACCCTNC -       | -CAACACC - -     | -ATCCCCTCT        | TCCAGNTCCC      | CATCCACC - -     | -TGCGANACC         | CACCTCCACC        | 361  |
| Echinops_telfairi           | CAANTAANC -       | - - - CAATA - -  | -GNGTCAAAC        | AGNAGCCGCT      | GACCACNCTC       | CCTGCNAACT         | CCGAAAAATC        | 228  |
| Sorex_araneus               | CAATCATT -        | - - - TCAAA - -  | -GCNCTAAG         | CAATANCTCT      | GTTCCANT - -     | -TGAAAAACN         | CCGAGANGCC        | 236  |
| Canidae                     | GAGANNNTAA        | CCAGAGAGAA       | GGGAANACNT        | TGTTGGCTC       | ATGATATTTA       | CAANGAACAT         | CTTGTTTGTT        | 288  |
| Otomomys_garnettii          | AATAACNTAA        | TACAGACACA       | CCAGCANTTN        | CCTCCGGTCA      | AGAATNCAAC       | CACCCCCAC          | CTGAGCCAAT        | 163  |
| Gallus                      | NNAAGGCTAA        | TNTAAACNG        | NNCNGGGGNG        | TNCCNACN        | TCNNGANACG       | NAGTTCTTGC         | AGNAGGAAAG        | 308  |
| Callithrix_jacchus          | NTTTACANAA        | ACTCCTCCCA       | GTGGTC - NAC      | ANTAANAATG      | GTAAGTNAAT       | TTACTNAGGG         | GGCTTTAAAC        | 276  |
| Crocodylus_porosus          | CTTGCTATAC        | ACTNAGAAGCA      | AGGANT - AGC      | CTCGGAGTT       | ATNCAGTACT       | TNGGACCAAT         | GGCGTGCAGT        | 271  |
| Erinaceus_europaeus         | AGCACGCCGC        | GCAAANCTTG       | ANGAGT - - - G    | NATAANCN        | TTTTNGAAC        | CGGCAG - GCT       | GGCT - AGAGT      | 247  |
| rnd-6_family-7426-LTR-ERV1  | ATCACNC - GT      | GCNAGATTCG       | AAGAGTTGAA        | CATGGATCTG      | TTTAGGAAGT       | GTATGGANCC         | AGTTGAGAAG        | 762  |
| Esox_lucius                 | - - - AGNTGTN     | AGTN - TCCTN     | AAGGGTTGAN        | AAGCNNACTC      | AGTCGTGATG       | TGTGTGAAAA         | CANTNT - GTC      | 249  |
| Salmo_salar                 | AC - AGTAGTG      | CGTGATTCAT       | NGGCTTTGAA        | GAACNTATTT      | ACCCACTTCN       | TGAGCTTATA         | TATGGTAGNA        | 373  |
| Didelphidae                 | CTTTGGTCTC        | GGTGGCCCGC       | CAG - - - - - AAA | NAACNGACNT      | AANTTCTCTT       | TGTGGGTATA         | GNCTAGNAN         | 330  |
| Latimeria_chalumnae         | TTTTNCCTAN        | GTTAAATAAT       | T - - - - - ANT   | GNCCNANCNT      | ATTACACTGT       | NTAGAACACN         | NNNGGTTGAC        | 1230 |
| Monodelphis_domestica       | TTTTCTGTGA        | ATTGAATGTT       | TGN - - - - - ACT | GATGTTTGT       | TTTCTGAGA        | CAGGGGTAAAC        | CCTAATAGAT        | 249  |
| Macropus_eugenii            | NCATTCAGT         | NGGANTTTNN       | CCN - - - - - GGT | AATGGGTTNT      | AAAAATNGGAC      | CTGGTTCCNA         | NCTGAGAGGG        | 262  |
| Alligator_mississippiensis  | AGAAGTATNA        | AAANCTCTCA       | ACATAAAATA        | AAAATTCAT       | ACCCCGTATC       | ACCCANAAAG         | CACCTGGACA        | 265  |
| Chrysemys_picta_belli       | AAAGNTATCA        | GGTGNCTTGC       | ANATCCACAC        | GANGGTGCAC      | NGCCCATNCC       | AACCAAGGC          | CNNTGGAGTA        | 2471 |
| Danio_rerio                 | NTGTATGGCT        | AAATNAAANT       | ATTGAAGACT        | GAGAAATGCAG     | TAAAGCAATN       | ATCCTATAAT         | TATT - ACTTA      | 392  |
| Taeniopygia                 | ATGCATGGCT        | GGATG - - - -    | -TGAAAACTN        | TTTNAAGTAN      | AAAAACCA - G     | GTCACTGAAG         | CGAC - ACCCA      | 270  |
| Dasybus_novemcinctus        | ATNTNNCAAT        | GGTTA - - - -    | - - - TTCAAGCT    | TACCTGGAAT      | GTGGGGAATA       | TGCTAACAA          | C - TT - ACCTG    | 232  |
| LTR_XT                      | TTTTNANGTNT       | ATATGTTGCT       | TTTTGGCTAAT       | GNCNANNNTN      | GNAACNNTN        | GTCTGGAAAA         | - - - - - ATATA   | 221  |
| Haplorhini                  | AGTATAGGTG        | ACCAATGGCC       | CTGGGAGGCT        | AGAGAACTAA      | TGCC - ACAAG     | ATAACTTTAC         | CATACCGGAA        | 7598 |
| Catarrhini                  | GTAATGGGAG        | ATCAATGGCC       | ATGGGAAGCC        | CGAGAATTAG      | TACCTACAGA       | CCCAGTTCTT         | GAT - - - - GAA   | 6738 |
| Anolis_carolinensis         | - - - - - - - -   | - - - - - - - -  | - - - - - - - -   | - - - - - - - - | - - - - - - - -  | - - - - - - - -    | - - - - - - - -   | 1184 |
| Murine_leukemia_virus       | GGGCTTGCAA        | CACCGGGGCTC      | ACTCCCTGCC        | TATCTACTAC      | TGTACTCA - A     | CCTCACCACC         | GATTACTGTG        | 6889 |
| Phascolarctos_cinereus      | GGGCTTGTA         | TTCTGGCCCT       | ACCCCTGCC         | TCTCTACATC      | AGTCTTCA - A     | CCAGTCTAAC         | GATTTCTGTA        | 6703 |
| Estrildidae                 | -TCAGACCCG        | G - - AA - - - A | AGTACAAACA        | GGAGGATAAA      | GGGGAGCG - -     | - - - AN - - - AAA | ACATGGAAGA        | 232  |
| Xenopus_Silurana_tropicalis | GCCCAACACA        | A - - ACCCTTG    | NGNTTNCATN        | GAAATAATAG      | GANACACG - -     | - - - ATTNANA      | ATGTTNAAAG        | 519  |
| I_XT                        | ANCCTNCAG         | A - - ANCCTTT    | NTCATNCATG        | GNAAATAATA      | GGNACNTG - -     | - - - GNTCANAN     | ANGTTTAAAG        | 7142 |
| Takifugu_rubripes           | AACNTGGCAA        | AGTACACTTA       | GCNCTGTGTA        | AGAATAGTAA      | ANCATACATA       | ACGGTGAAAC         | ACGAGTAAA         | 412  |
| Bos_taurus                  | CAGTGCNCCC        | AAAANCTGCA       | AACC - - - - GNC  | ANCCCTCCAG      | - - - GANC - - A | AAAGAAC - CA       | TCAAGCTNG -       | 239  |
| Homo_sapiens                | CAAT - TCCN       | AGCTCAATA        | TCCCTCAAAA        | AACCTGGCAA      | - - - AACCTA     | AATTCCC - CA       | CCAACCAA -        | 228  |
| Microcebus_murinus          | CCAAACTACA        | AGGTTAAACA       | CT - AACCCGG      | GTCTNTAAAC      | - - - TATTTGA    | AAATCANAGA         | ATCTTTNAA -       | 190  |
| Myotis_lucifugus            | NCTACACACA        | ACGNTAAACA       | TTTGATTAAG        | GTCCTAACNT      | - - - GAGCCCT    | - - - CCCACANA     | CNCGCTCAAC        | 201  |
| Equus_caballus              | - - - - - - - TTA | TACCTGTAAT       | GA - - - - - - T  | ANCCATAATN      | - - - AAAGACA    | -CAC - GCCCT       | TNGCAATAAC        | 203  |
| Tupaia_belangeri            | ATCAACCCTA        | AGCCTGTGAG       | AACTTTTCTC        | NCCAACAACA      | - - - AAAAAA     | GCAGTCTT           | TAATCTTACC        | 236  |
| Loxodonta_africana          | - - - - - - - -   | ACCCTCCAAT       | AAGACN - - TA     | ACCCNCAATTT     | - - - NCAGAA     | ACGTGAC - - G      | TAGCCATATT        | 205  |
| Murinae                     | NTATCTGACN        | AAATNTNCNTG      | TAANACTANN        | ACCTTTNCCT      | - - - NAAATGTT   | GNGTCANTCA         | TANNNTGCTA -      | 247  |
| Canis_lupus_familiaris      | GTCTNAAAAC        | CANCTCTACT       | TCATTATAAA        | ACTAANATTTG     | CCTCCTAANT       | AGGTGAGAA          | NGAACTAATG        | 250  |
| Sus_scrofa                  | CCCCTTNCGC        | AAGTTTTAAC       | CCAT - ATGTG      | A - - AAGGCC    | GAAANTGNGG       | GCACCAGGAT         | CGNACAGGT -       | 208  |
| Choloepus_hoffmanni         | - AATTAANNA       | AAAN - - CACT    | GNAC - - - TNTA   | ATCCAGCTGC      | - - - CATA - AA  | CTATAAAAA          | AA TNGAAAAA       | 211  |
| Vicugna_pacos               | TGATCACCAT        | AGAT - - AACT    | GTCTGACTTA        | ATNCAGNTAC      | T - - CATNTGA    | ACATAAGAA          | CCANAAAAATA       | 223  |
| Gavialis_gangeticus         | NCTGNGCTA -       | GTTCAATANN       | TAAATGATTT        | GCNTGNAANA      | TCTACTACNG       | TCCGACTNTG         | TAANGCTGAT        | 298  |
| Mammalia                    | TTNATACCAT        | ATCTAGGNAN       | GAGNTNNTTC        | GGATATGNCG      | TNAGGNAAGN       | CCCTGCCAAN         | AGNNGAAGAG        | 350  |
| Passeroidea                 | TGCTGGAAAC        | NACCANGCNG       | -ANGGATCNN        | AAATCCGAGT      | TCCGGTAACT       | CGATNAGNGN         | NA TACATCGC       | 317  |
| Takifugu                    | CCTCTGCAAG        | AAGAAATGTA       | -AC - - - - TTT   | GACCTGGCCA      | TCTGGGAA         | CAACGGAGAA         | CAGGACTGTT        | 307  |
| Pteropus_vampyrus           | - - - - - AAAAG   | ANNATNTCC        | -AC - - - - -     | - - - AGAGCCA   | ATAACAATCA       | CAATGANAC          | ACTTGGCNAT        | 222  |
| Ornithorhynchus             | AGGTTGCTCA        | AACCGTGCN        | ANGGCCGGT         | CCNATCTNAC      | GGNCGNTCCT       | CTCGAGANCC         | CTGACGATNN        | 1793 |
| Oryctolagus_cuniculus       | NTATAGCCAA        | GTTTCTCATC       | GCAGCTCGAG        | G - TATATCNT    | TAAACNTCCA       | AAATAGTGA          | ATGANGA - CT      | 234  |
| Gallus_gallus               | TAGNAACATA        | NCACTGCNTN       | NTGNTGNGG         | CNNAATGATT      | TTTCANTGNT       | CC - - - NATTG     | CTAAGGANTN        | 230  |
| Hominiidae                  | NNNNNNNNNC        | GGCNNNNNAN       | GNNNTNNNNN        | CCCNNGANNA      | NNCNGNNGAG       | GNNG - CANCN       | NNANNCTTN         | 3964 |
| Metatheria                  | NGCNCNNTNN        | NNCNNNCCAN       | GCATATGANA        | CCCNANNNN       | GNNANGTANA       | NNNGTNTA           | ANTTANNNA         | 286  |
| Rodentia                    | TGC - AGACGA      | AA TCCACCAA      | ACTAACGCTG        | CCCACCCAGT      | CGGGGCCGAG       | GCGGTCCCCG         | ACCAGACCC         | 1580 |
| Monodelphis                 | TGN - AGTTNG      | AAANCTNNNN       | NTTNTNCNT         | CTTNNNANTG      | NANNNTNNAN       | NAGAANNNNC         | NNNCTNNNCC        | 454  |
| Consensus                   | ATCTAACCAA        | AACAAACA - -     | -AGACCAAAT        | AACATGCCAT      | TATCCANATA       | CNATGAAAA          | CATTGNAAN         |      |

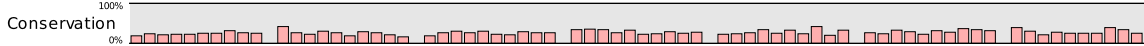

|                             | 7,720                 |                     |                       | 7,740                 |                       |                     | 7,760               |                     |     |  |
|-----------------------------|-----------------------|---------------------|-----------------------|-----------------------|-----------------------|---------------------|---------------------|---------------------|-----|--|
| Dipodomys_ordii             | TGTGCAAGCC            | TGTC AATTTT         | NNCCGCNGCA            | ACNCCNTNCC            | N TAAACGANT           | CGCTTCAACC          | GNTAGATTCN          | 317                 |     |  |
| Laurasiatheria              | TGCCTCTTCT            | CTATAAAAGT          | CTTTCCCCTA            | GCCTCCTGTCG           | GTGGAGCGCT            | CCTAACCACT          | TCCTGGTTTG          | 282                 |     |  |
| Eutheria                    | ATAAGGCAAC            | T-GCCTCAGN          | TNTAACCA--            | -ATCAGGTGA            | TTGCTT-TAT            | CTTACTTCCA          | CCTTCTCTTT          | 306                 |     |  |
| Tarsius_syricha             | TNAGTGCAAN            | T TAA NGTAA G       | CCTTG TAC--           | -CTCACCTCA            | CAACTA-TGT            | CGCCTACTTA          | GCTG--TTT           | 332                 |     |  |
| Muridae                     | NNNGNGNNAN            | N-ANNNNAGA          | NNTTACANAA            | GNGTACGCTNN           | NANNCAGCAN            | NNGTCTNNGG          | NCANNGANNN          | 2095                |     |  |
| Gasterosteus_aculeatus      | N TTTNGCTCT           | NCCNGATNAT          | AGGCAACCGT            | TCAACCTAGN            | TGTTGACGAT            | NGANCCGGNN          | GTNTTANTNN          | 1756                |     |  |
| Felis_silvestris            | C C C A A G T T C     | C C C G G A C G A   | A A T T A C C C A     | - C A A C C - C       | T A A C C A C C A C   | C G A G C A G A     | G C T T A C C C     | 322                 |     |  |
| Rattus                      | C C C A - - - A G A A | T A T A G C G G T T | G A T T G A A A A T   | N A N A T T G T A C   | T T A C A G C C C G   | C A C A G T T C A G | G A C A G G T A G A | 288                 |     |  |
| Papio_hamadryas             | C C A - - - G G A T   | A C T G G G G A T T | A A T T G G A A A T   | T G C A T T G T G C   | T T A T A G A C C C   | C A G A G C T C A G | G A C A G G T A G A | 5060                |     |  |
| Pan_troglodytes             | C T C - - - A - - -   | T C T G G G - - - - | A A T T G G A A A C   | T A C A T T G C G C   | T - A C A G G C C C   | C A G A G T T C A G | G - C A G G T A G A | 2870                |     |  |
| Ailuropoda_melanoleuca      | C T A T - A A A N C   | A N C A N N G T N C | C A A A C N A A C C   | T A C C T T A T C C   | G A A A A C A T C N   | T N T C T A N C A N | A T T G C C T A N A | 272                 |     |  |
| Cavia_porcellus             | C T N T C C A A T C   | A N C T N T A G C C | A A G T N C - - T G   | C A C C G T T C C A   | A A T T A A C C A A   | T G T G A T N T G C | T T - - C T G T A A | 359                 |     |  |
| Ictidomys_tridecemlineatus  | N T G T C T G A A A   | A T T G T T A T T A | G A T T T T - - C C   | C N C G G T N T T T   | G G C A A A T T N C   | T A A G A A A T G T | T A A G C T G T A A | 338                 |     |  |
| Canis                       | C T A T G C N A C A   | G G C T A A A C T N | C A A T T C A A T N   | T G C A A C N A G A   | A C C C G G A C C T   | N G N T G A C T G T | N C T G C T T T C T | 295                 |     |  |
| Felis_catus                 | G A A G T A N A A A   | A C A - T A T A A A | A A A T T C C T C C   | C C C T T C C - - -   | T C C A C C A C C A   | G A T C G G C C T T | C A G N N C T T T   | G A N A C T T C A G | 261 |  |
| Ochotona_princeps           | A C A A C T A N A G   | A C A - T G C A A A | G A A T A A T G G C   | N C T G T G N A C A   | G A N T G G G C T G   | N C A T T A C C A T | - A A A C A T G G T | 295                 |     |  |
| Cercopithecidae             | C T G G T C N A A G   | A C N C T G T T A A | G C T T A N C C T C   | G G G C A A N A A T   | T A A C G G T C N N   | C A C N C C A C A C | - G C C T G N N N   | 1226                |     |  |
| Carnivora                   | T T G T A A - - G T   | C T T C T T T A G C | A T A T G A A A C T   | C C T T T T G G - -   | - A - - - A A C C     | T C C T T T T C C C | T T A C C T C C C - | 251                 |     |  |
| Mus                         | C A G A A G A G N C   | C T T A N T C A G A | C T N T G G G A C C   | N T G N A A A N - -   | - G C C G T G G C C   | T A C C T A T C C A | A N N N N T T G G A | 1269                |     |  |
| Mus_musculus                | C A A - - - - - T     | T A T T G T A A C T | G C G C C C A A C T   | T T T C C C A C - -   | - C C C A C C - N N   | C C A A T C C - - - | T G A G T A C T A   | 286                 |     |  |
| Rattus_norvegicus           | C A - - - - - - - -   | - - - T G T A A C C | A C A C C - A G C T   | T C T G A A N T - -   | - C C C G C T - G C   | T T A A T C C C C C | T A A G C A C C C T | 238                 |     |  |
| Tursiops_truncatus          | C N G - - A - A N     | A G C T A T C N N A | G T N C T T C A C T   | G C T A T N A T - -   | - C C C N A T - C A   | C C C T N C C A N C | T C T A A A A N T   | 347                 |     |  |
| Procavia_capensis           | T T C - A - - C C     | C C C G C C C G N T | A T G C T C A C T     | C N C C C A C T A A   | - C C C G C T - C C   | C C C G C T C N G T | A C T C T G N C T T | 270                 |     |  |
| Primates                    | C N T C A A - - T A   | A A A N C T C N G C | A T T C C C C A T C   | C T T N A A G C C N   | A T G T G C G A C C   | T T N T T C C T C C | T G G A C A C C N G | 429                 |     |  |
| Echinops_telfairi           | C A G - - - - - G A   | A C T C T N - - - C | G G A A C N A C G N   | C A T A C A G C G G   | C - - G G C C T G G   | G T A C G C C C C C | G C C T G C G T A A | 288                 |     |  |
| Sorex_araneus               | N G C - - - - A A     | T C A N A A A T N   | G T A A C T A C T T   | C N N A A A A N T G   | C T C A G A T G C T   | G N A T G A N C A C | T T T T G C A T A   | 301                 |     |  |
| Canidae                     | A T T A N G A T A G   | T T - N C N A G T C | - C - - A C C N T G   | T T T G T C T A A     | A T A T C C A C N C   | N G A T A T T G A C | A A G A A A T T T A | 354                 |     |  |
| Otomur_garnettii            | C C A A A T C A C A   | T T - A T T A G T A | A T - - A C C C N A   | C T T A T A A A A     | A A C T A A C C A C   | C A A C A - - - - - | A A G A C A T G T A | 225                 |     |  |
| Gallus                      | A C T A T N A G C C   | T T C G C G A G N A | A T G G A C A A C G   | A N G N N T T C A A N | N A T N G A G G A C   | C A N G A G - - - - | G A G A C C C C N A | 374                 |     |  |
| Callithrix_jacchus          | T - - - - C A G C     | T T C T C T N T N   | C A A T A G N G N T   | T C C N N N T C A G   | A G - T N A C T T     | N N T A C T A N T N | N A N G G A A G C C | 340                 |     |  |
| Crocodylus_porosus          | T - - - - G C T T A   | C T N T T G T G T T | T N T C T G A A C C   | A G T T N G A         | N G A T T G A C T T   | C C T G T T C C G G | C G C A G G T C T   | 337                 |     |  |
| Erinaceus_europaeus         | T - - - - G T - - A   | A N A G T - C N N C | T A G N T T T C C G   | N C G G T G T N A T   | A A N G T T C N G T   | C C T G C C C T C T | N C N C N G N - - A | 308                 |     |  |
| rnd-6_family-7426-LTR-ERV1  | C - - - - G T T T G   | A G G G A - T G T C | A A G G T G G A C A   | A A N G C G G N G T   | N - C A T G A G G T   | C G T T C T T G T T | G G T G G A T C G A | 826                 |     |  |
| Salmo_salar                 | T - - - - A T G G A T | A A N A T A A A T A | C C A G T - - - G A   | T A G A A C A A A G   | G G A A T G T G T T   | T N T T T T G A C A | T A G G A C A G A T | 316                 |     |  |
| Didelphidae                 | N T A T G G A A G T   | G A A T G A A G A T | A T T G T C T G G A   | C N G N A G A G C C   | A A A A A N G N N N   | C T G G N G A A A N | T T N A A C A A G N | 443                 |     |  |
| Latimeria_chalumnae         | T T C C C G A T T T   | C A C T C T T C G T | C A C C T - - - - -   | T A G C A N A C C T   | A A T A T C C A T T   | T T C A A T A T C C | G N A N A N C T A A | 395                 |     |  |
| Monodelphis_domestica       | C G C C C - T T C N   | A N N T N N C N T T | N A T N T N G C T N   | C N N N A C A G G N   | T A T A A C C T T T   | T G T A A N N N N C | T A G T A A N A T G | 1299                |     |  |
| Macropus_eugenii            | T T T A A A T T T G   | A A G C C T T C G T | C A C C T T G A T N   | T T T G A - G G C     | T A N C T C A G T T   | T T T A A C T T T A | T A G - A A T C A   | 316                 |     |  |
| Alligator_mississippiensis  | - - - - - T T A G     | G T N T C C C G N N | T A G A T T G T A A   | G C C T - - - G C C   | T C C C A G C C A A   | T G T G A A T A T N | G N C A G T G N G   | 323                 |     |  |
| Chrysemys_picta_belli       | G T A G A A A G A A   | T G A A T G A G T N | T A T T A A A A A N   | T A A A A T A G C A   | A A A A T G T G T G   | A T A A A A C T G N | T C T G A A N T G G | 335                 |     |  |
| Danio_rerio                 | G T G G A A C G N A   | N A A A T G N A N N | - A C T C A A G C N   | N C A N C T C T C N   | A A G N T C T G T G   | A N G A N N C A T N | T N T A A G G T G G | 2540                |     |  |
| Taeniopygia                 | G A A - A G A A C A   | N N C A T G A G A A | A C T A C G C A T T   | A A A A A A A G C -   | - - T N T G G A A C   | T A T T A C A G G A | - - G A A A N G A A | 334                 |     |  |
| Dasytus_novemcinctus        | G A A T G T G G G N   | G A T A T G T G C A | A N C - - - T A T N   | G A G T N T T G T C   | A A A A C G T A A C   | T G A T A C T C A G | A C A A A A A C T T | 299                 |     |  |
| LTR_XT                      | A G A A G T A T A C   | A N G A T N N A A A | A G T A T T A T T N G | N T C T A C T G C C   | T A T A C A N G T T C | T T A A A C N N T A | A A A A A A A A T T | 291                 |     |  |
| Haplorrhini                 | T T T G T T A C A A   | A G T T C A A T G C | A A A C C C A - A G   | T G T C T G G C T A   | T T A A A A A C C C   | C T A T C A T T G G | A A G A T A C T G C | 7667                |     |  |
| Catarrhini                  | T T C C C G G C T C   | A A A A G A A T - C | A C C C T G A T A A   | T T T C T G G G T C   | C T A A A A N C C T   | C A A T T A T T G G | A C A A T A T T G C | 6807                |     |  |
| Anolis_carolinensis         | - - - - - - - - - -   | - - - - - - - - - - | - - - - - - - - - -   | - - - - - - - - - -   | - - - - - - - - - -   | - - - - - - - - - - | - - - - - - - - - - | 1184                |     |  |
| Murine_leukemia_virus       | T C C T G G T T G A   | G C T C T G G C C A | A A G G T G A C T T   | A C C A C T C C C C   | T G G T T A T G T -   | T T A T G G C C A G | T T T G A G A G A A | 6958                |     |  |
| Phascolarctos_cinereus      | T C C A G A T C C A   | G C T - T G T C C A | T C G C - - A T C T   | A C T A C T C A C C C | A G A C G G T A C C   | T T G C T A C A G G | C C T A T G A G T C | 6770                |     |  |
| Estrildidae                 | T G G A C T A C A A   | - A A N C A A A A G | C T G C A A T N G G   | A G C A T G A A C C   | - C G G C T A A G C   | A A A T G G A G C A | A A A C T T A G A A | 300                 |     |  |
| Xenopus_Silurana_tropicalis | A C T G T T A C A G   | T A N T T T A N A T | G T G G A A T T G C   | A T T A A G C T T T   | G T A G T T N A T N   | T T N T A T C A T G | A N T A G T A C T T | 589                 |     |  |
| I_XT                        | G T T N T T A N A T   | - A C T T N A C A A | A A G N A A T T G C   | A A N A A G C T G T   | - - - G N T N A T N   | T T A T A A C A G N | N N N N A - G T N G | 7207                |     |  |
| Takifugu_rubripes           | A T G N C T A A G C   | A G A A G G A G G A | G C C C G G G G C T   | G G G T A A N C C C   | A G G C T C C A A A   | T T G T A T A A A A | G C T G G - A N A A | 481                 |     |  |
| Bos_taurus                  | - T A A C T T T A     | A N T A T G A C A   | T G T C A C G C C T   | C C C N T C A A C C   | A N C A T A A A N A   | T T T - T C N T G A | - N A T A A C C A C | 306                 |     |  |
| Homo_sapiens                | - T C C T A T T A A   | N A C T C C T C C C | T A C C A T G A A C   | T C C T N C T A C T   | C C T A C C A T C C   | C C C - C T C C C A | - A C C C T C C A G | 295                 |     |  |
| Microcebus_murinus          | T C A A C A C C A A   | A A A T G T T T A T | G C C C C C A C T T   | A G C C T A G T C C   | G A A C C C A A G A   | N C N - A A A A G A | - A A N A A T C C C | 258                 |     |  |
| Myotis_lucifugus            | T C N C T A A C G A   | C A A C A G A C C C | A A C T T G G C C T   | A C C C T C T C T N   | C C T C C C A A C C   | G C G - G A A A T A | T A A C N T C C A   | 270                 |     |  |
| Equus_caballus              | A - - C C A A C C T   | G A N T A C C A T A | A A C A C A T A - A   | G T C C C C A A C C   | C A A A A C T C C A   | T A C - T T T C A G | C C A C C A T A A - | 268                 |     |  |
| Tupaia_belangeri            | T T C C N A N N A T   | A A A C A C C C N   | T N A C A C C C N     | N T C C C A A T T C   | C A T N T C T T T     | T C C - C C C A G N | C C A C T A A A A   | 305                 |     |  |
| Loxodonta_africana          | A G A T C C C T A T   | T G C G C C T G C G | T G C T A A T T A A   | N N N T G A A T C T   | C C A T G N T G T A   | A T C - T G C A N G | A N C C C A T T A A | 274                 |     |  |
| Murinae                     | - T C A T A N C C C   | A T G N N C A A G A | T T C T A C T N A N   | N T C T G C A T N N   | C T A N C T N N C A   | T C N A T N T N A A | T G G A A A A C C   | 316                 |     |  |
| Canis_lupus_familiaris      | T A T A A C A C A T   | G N C G A T G A A T | G N A C C A A C A T   | G T T A T T A A A C   | T N C - - G T A T C   | C G T A A T T N T N | C C A A G C G C C A | 318                 |     |  |
| Sus_scrofa                  | T G C A N G A T A T   | N N N G G T C A A C | G A - C C A G C A A   | G G C C C A A A C     | A A G C A G G A C C   | N A T A A A T C A A | A C A T G C N T C T | 277                 |     |  |
| Choloepus_hoffmanni         | C T - A N T - T A C   | C T A G C T C T C T | - - - C G G A A T T   | G T T G A A - A C     | C T C T G G A A T N   | C C C C C C N C C T | G T A C A C A A G T | 274                 |     |  |
| Vicugna_pacos               | T G - A C A G C A C   | C A A A C A C C T N | G G C C N T A A T C   | A C T C A N C T A C   | T T C G G A T A C C   | G C C C C C T C T C | G A N T N T A T A T | 292                 |     |  |
| Gavialis_gangeticus         | T N G T T - T G A A   | C N C T G N C T N   | T C T T G C T T N T   | A N G G N N T - - -   | - A A A A G G T A T   | C T T N N T C A A A | N G C T G N - - - A | 360                 |     |  |
| Mammalia                    | N G G A A G T G A A   | A G C C G C C C C   | T T T G C C C T C     | G G G G A T T G T     | G G G A A G A G A     | A G G A A N G G A   | G G T A G G C - A   | 419                 |     |  |
| Passeroidea                 | T T C C C - - G N A   | C A C N G A N T T G | T N N A A C T C A G   | C G C A G A G A A A   | A G A G A C N N N -   | A T G A A N T A T G | G G N A C T C T G A | 384                 |     |  |
| Takifugu                    | N C C - - - - A G     | C A T C C A A - - - | T G G G A C T G G A   | A G A A G A A G A C   | G A G G T C A T C C   | A A G A A G A A G G | A C T G G A T T G G | 269                 |     |  |
| Pteropus_vampyrus           | C T N C C - - T A A   | G A T C - A C C C A | T A T A A C C C C T   | C A G T A T G G A C   | C A A A T T T A T -   | - - - - - - - - - - | - A C A N A T T T A | 278                 |     |  |
| Ornithorhynchus             | G N T A N T C A N N   | G A T G G C T C C T | C T T T C T G G A     | T G A G G G G A A C   | C G G T N C G C C G   | G G G C T G C A G T | N G N A A C T A A C | 1863                |     |  |
| Oryctolagus_cuniculus       | G C A A G C C A A G   | C A C T T T G C C C | C G G T T C T G - A   | C C C G C C C G C C   | T G A N T G A C T G   | A C N A G G T G T A | C C A A A A C A G T | 303                 |     |  |
| Gallus_gallus               | C C A A G A N N N G   | N N T A C A T T C N | T C T G A G N C A     | C G C T A G T G N C   | T T T T C A N G N N   | N N N C N N C A G G | G G T N N G T N C A | 300                 |     |  |
| Hominidae                   | N G A - C N N N N T   | C N C A N A A N G N | T N A N C T C N N N   | N C N C N N N C C N   | N G G C N N N N N N   | C C - T N N N N C N | G G N A N N N C N N | 4032                |     |  |
| Metatheria                  | T C N - G N G A N N   | N N N N N N N T C T | T N G T C T G N N T   | A N N N N C N N N G   | N N N N N C N N N N   | C N C N T C N G N T | N N T N N N N N N N | 355                 |     |  |
| Rodentia                    | T G A A T G G A A T   | T A C A A T A N C C | C A G G G G G C A T   | C C T A G C T A G G   | G A T C A A T T T A   | T A A C T T G C C T | C C T G G C C G G T | 1650                |     |  |
| Monodelphis                 | T N A G N C C C N G   | N N N C N N N T N N | N G N N G T N N N T   | A N N T N N C N N N   | N N T T N N N N T G   | N N N C N N G G T G | A G T G A A A A G N | 524                 |     |  |
| Consensus                   | T T A A - G A T A A   | A A C T T T A A C A | A A T T A C A N C T   | T C T A A C A T C C   | A A A C T G A A C C   | C T A A A T C C G A | G C T A A A T T A A |                     |     |  |

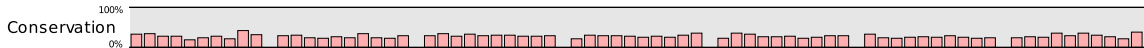





|                             | 7,860                     | 7,880              | 7,900          |                  |                  |                  |                  |                  |      |
|-----------------------------|---------------------------|--------------------|----------------|------------------|------------------|------------------|------------------|------------------|------|
| Dipodomys_ordii             | GCCACTTT - - - CTGNTGTC   | TNGTATGACT         | NTGCAATCCT     | TGTAAGTGA        | TNANAANCCT       | GTTGGTCCTC       | 450              |                  |      |
| Laurasiatheria              | - TTATCTT - - - TTAACACA  | - - - - -          | - - - - -      | - - - - -        | - - - - -        | - - - - -        | 361              |                  |      |
| Eutheria                    | - TGCTGC - - - CCGATT - C | ATGAATCGT -        | TAATTTGCTN     | AAATAAACTC       | TTTNAAAATTT      | NTNTCTT - - -    | 431              |                  |      |
| Tarsius_syrichia            | - CTGCTCT - - - GCGGCCGC  | NAGCTTAAT -        | AAAGGTAICT     | ANAANATTAN       | CTATGGCTCG       | GTGTGTT - - -    | 455              |                  |      |
| Muridae                     | - NNNNTCN - - - NGNANTGC  | TAGTCTNANG         | NAANNANNA      | AANAANTNAA       | CTCTNNNTCA       | NNATCTNATA       | 2228             |                  |      |
| Gasterosteus_aculeatus      | ATAGCANNAG                | GACTACNACA         | ATGCANNCGA     | GNTGTGGCAG       | CNGNTGNAAA       | GGCNCTAANG       | NNCTCTNCTN       | 1895             |      |
| Felis_silvestris            | CCCGCTTT - - - CTAACAC    | - - - - - TGGGA    | - - - - -      | GCCTGGT - G      | CACCAGTAAA       | GACTCTCTGC       | CGAAGTCGGA       | 443              |      |
| Rattus                      | - GACTCTCT                | AACTCTTTCG         | NCTCTTCCGA     | GCNCGGNATA       | CCCTC - - - CCT  | ATATAANCTC       | NCTCCNTTTG       | 416              |      |
| Papio_hamadryas             | AGACGCCTCC                | TATCTCTAGC         | TCTATTAAGA     | GCNCGGAAATA      | CGCCTAACCG       | CTTTGGGCTC       | ACTCCATATG       | 5197             |      |
| Pan_troglodytes             | - - - - - TTGG            | TACCTCTCCT         | GCTCTTTCCG     | GCCCCGTAATA      | CCCTT - - - - -  | - - - - -        | ACTGGCTC         | ACCCCTTACG       | 2978 |
| Ailuropoda_melanoleuca      | - - - - - CNCGG           | GTCCNCCN           | NCTNTATAAA     | NCTNNGTTTA       | TAACN - - - - -  | TT               | TGACNCCN         | ACCGCTTCTN       | 391  |
| Cavia_porcellus             | - - - - -                 | - - - - - CCGTATAC | GTTTGTCTGG     | AGGACCC - CA     | TGCGCACGGA       | ATNANAA - AC     | CCTTTTGT - -     | 473              |      |
| Ictidomys_tridecemlineatus  | GTCTTGTCT                 | CCCTTCTTGA         | GNGNGCCCGG     | AGCCGCCGCG       | TGCTGGTGCC       | CCAATAA - AC     | CACCCTGCTG       | 471              |      |
| Canis                       | AGTCC - CTGC              | TCCGCTGTGT         | CGGNNCACT      | TGGNCCCAAG       | CTCGAGCTTG       | TAATAA - AC      | CCTCGNGT - -     | 421              |      |
| Felis_catus                 | CCCTCNGCTT                | TCCGCTGTG          | NTGNCNAGGA     | CCAG - - - GTT   | CCACTTCACC       | CCGATAA - AC     | GACTTTTGT        | 388              |      |
| Ochotona_princeps           | NTTCTTGCCT                | GTGCTTGGG          | CCCCGTCTGA     | CTGGCCTGCT       | TGNCCCGAGC       | TTAACGG - TC     | TGCTCTGCTG       | 428              |      |
| Cercopithecidae             | TNCTNNATCC                | CTCTCNCNTG         | ACTCTTNTNG     | CCCC - - - NNTC  | NCTCTAAACC       | CTGCTTC - GC     | TNTTGGCATT       | 1359             |      |
| Carnivora                   | CGGGTCCTGT                | CCCCGTGCTT         | TAATAA - - AA  | TCACCTTTT        | GCACCAAAGA       | CGTCTCA - AG     | AATCTTTTCT       | 381              |      |
| Mus                         | NGATNCTGGT                | NNACNACTAN         | AGNTCAGCAN     | NTACTGAATA       | ANNCCCAATG       | CTNNTNACAG       | CANTNCTG         | 1401             |      |
| Mus_musculus                | TCGGCCCCAG                | NNTCCGCTGT         | T - CGCAAAA    | AAGACCTCTT       | GCNNTTTTGA       | TCAAGGACGG       | TTTCTCTG         | 417              |      |
| Rattus_norvegicus           | CGGNGGTACC                | CCTAANNCGT         | C - GGATTAAT   | AAAACCTCTT       | GCTTATTGCA       | TGCAACACGG       | TTCCTGGTG -      | 369              |      |
| Tursiops_truncatus          | NCGANCCGCG                | GCTCATNTG -        | - - - NAATTAAG | ACTACTCTCN       | NTTTAANCTN       | CAACTTTTNG       | CTCTNCTG         | 476              |      |
| Procapra_capensis           | ACTCGGGGCG                | GCTTGTGGG          | A - GCATCAAG   | GCCTGTCTT        | CGCCNGTG - A     | CTTATGTCTC       | CGTAATTCCG       | 400              |      |
| Primates                    | GAAGGCTGCC                | GCTTTNCCGG         | NCCGAATTA      | TACATACNCA       | CNCNTNGAAA       | CTAATGCCTT       | AGCGCNTAAC       | 567              |      |
| Echinops_telfairi           | CCGTGG - - - -            | GTTGGCATT          | TAGAACCCTGA    | AACNCT - GCN     | TAACCNTGAT       | AAATANACAC       | TTT - - - TTTT   | 411              |      |
| Sorex_araneus               | TCGAAGACGCC               | ACTGTGCTGG         | CTGAGCTAGC     | GACCCCTAGCT      | CGAGCTAGCA       | ATAAAGTCCC       | TTTGGCTTTG       | 433              |      |
| Canidae                     | GGGACCCCTC                | TCACTNCTGA         | GAGCTTTC - -   | - TCTGTATCT      | CTGCTTAATA       | AACTTCTATC       | GCTTTNCTCA       | 485              |      |
| Otomomys_garnettii          | AGGGGCTNTG                | NTTCTTTTGG         | NNACTTCT - -   | - AGTATCTGT      | GTCCNGGAATA      | AAACTTTCTC       | CTTACTATTG       | 353              |      |
| Gallus                      | NAGGNATAANG               | AATTNCCNGA         | AAATCATTTGA    | TTATGTANTA       | GTTCCGGCTN       | NATCTATAGC       | ANGATTTNCA       | 510              |      |
| Callithrix_jacchus          | NCCNCAA - - - -           | - - - - - GNCC     | AAAGTTGNNT     | G - - - - ANATA  | NTCACCTCTC       | CNTGGCCN - -     | - - - NCATCNT    | 453              |      |
| Crocodylus_porosus          | TCCCTCAGCT                | TGTTCCGACT         | TTCTTGCAAC     | G - - - - ANATA  | AAACTCTTGT       | CTTGNTA - - -    | - - - ATGATTG    | 462              |      |
| Erinaceus_europaeus         | NCTC - - - TNGA           | GCTGTAACAT         | NCTGACCTGN     | A - - - - NCACA  | CNGNCTG - -      | - - - - -        | - - - - -        | 420              |      |
| rnd-6_family-7426-LTR-ERV1  | CCCCGACGAG                | GCAGTGTCTT         | ATGNGCTGCG     | T - - - - GTNCA  | AGCTGCNAT        | CTCAGTGGTG       | AGGGTAACGA       | 962              |      |
| Esox_lucius                 | TNCAT - - - - -           | - - - - - TAGAGA   | NTCCTCAGAC     | G - ATATATT      | GTGTAAGCGT       | TTGANGCCTC       | TCTCTTATT        | 434              |      |
| Salmo_salar                 | TTGNCCCTTG -              | - - - - - TGANAT   | CTGTTCTGAC     | ACAGTATCAT       | GGAGAATNAC       | ATNGACNTN        | TGTTATATT        | 577              |      |
| Didelphidae                 | GTNTT - - - - -           | - - - - - TTGAGA   | ATACNGATAC     | AATTANTAA        | AANTCAAAT        | CTTAAGAGCT       | GCTGNCANCG       | 515              |      |
| Latimeria_chalumnae         | TTCACGACAGG               | CAGTTGGGTTN        | CATNTAAANG     | TATTTCANCG       | GNANAANTTT       | GTGAACCTGC       | GNTNGAAANG       | 1437             |      |
| Monodelphis_domestica       | NTCAC - - - - -           | - - - - - TA       | ATTAATAAAT     | T - - - - TAGATT | GGACAAATTT       | GNTTTTAGAT       | TTTAAGAAAG       | 438              |      |
| Macropus_eugenii            | CTCNTG - - - -            | - - - - - ATT      | CTTACGAAG      | A - - - - -      | GACGCCNNT        | CTCGCNAGAN       | CNTAATAAAA       | 439              |      |
| Alligator_mississippiensis  | ATGAAGTGCT                | GATTGGAAAG         | CCATGTCNNT     | TTGCTT - - - T   | CCAGCAGTAC       | CACNAC - - - -   | - - - ANNCCAG    | 466              |      |
| Chrysemys_picta_bellii      | TNGAGATTAT                | GATTGGAAAG         | GCNTGGCCTN     | TGAAGGG - T      | ACACTNGCTC       | TGTTAG - - - -   | - - - GGGAGTG    | 2672             |      |
| Danio_rerio                 | TTAAAAATA                 | ATTTAAAT           | ATATGTAATA     | AGAATTAGAT       | GTTATAGATG       | TTTTNTAAC        | AGAANTNTT        | 600              |      |
| Taeniopygia                 | ATAGAGNGTN                | - TGTTAANTC        | ACANGGCCNG     | GGCCAGNGC        | ATNTTGGATT       | GGTCTC - - - -   | - - - GCTNGCT    | 464              |      |
| Dasyatis_novemcinctus       | CCNAAAAATTC               | TATTCGGGGC         | TCCGATTTT      | GGACAGGAT        | CCCCGAGCC        | CGCCCGGGCC       | TTAATAAACC       | 439              |      |
| LTR_XT                      | CATNATTTT                 | NAGNCTGNC          | NTNANTATGT     | CTGTNTGANT       | ACTCNAATCA       | NGTAAN - - - -   | - - - AAAAACC    | 424              |      |
| Haplorhini                  | TGAAGAGTC                 | TAGAACAAG          | ACACAGTGA      | GAAGCTTAT        | AGACAATTC        | TCTGTACCAG       | ATTTTAACCC       | 7804             |      |
| Catarrhini                  | ATAATGGTAC                | CACAAAAACA         | GTCATTGGT      | GGAGTTCAAA       | TCACA - - - -    | - - - - - CAG    | AGAGGAATCC       | 6932             |      |
| Anolis_carolinensis         | - - - - -                 | - - - - -          | - - - - -      | - - - - -        | - - - - -        | - - - - -        | - - - - -        | 1184             |      |
| Murine_leukemia_virus       | ATGGGGCGCA                | TAGCTGCAGC         | AGTAGGAACA     | GGGACTACAG       | CCCTAGTGGC       | CACCAAACAA       | - - - TTCGAGCA   | 7088             |      |
| Phascolarctos_cinereus      | GCAGCAGGTA                | TAGGTACCCG         | CTCGACCCGC     | GTAATAAAAG       | CCTCCAACAA       | GGTTTGAATA       | - - - - -        | 6907             |      |
| Estrildidae                 | TTGGGGGCGAC               | ANGCAGCTGC         | CAAGGTGGAC     | CCAGTNGAGT       | CTCTT - T - - -  | - - - - - TAATAA | - - - - -        | GTCCAGCTA        | 423  |
| Xenopus_Silurana_tropicalis | CTNNACTNAN                | TAGCACTNG          | TTGAA - AGAT   | NCAACNGCT        | CTGTTGT - - -    | - - - - - CAANAA | CNTTCTGTGN       | 714              |      |
| I_XT                        | GNAAAACANT                | TANCTCTGG          | NTCAA - ANNT   | ACNACAGCT        | CTTCTGT - - -    | - - - - - NAGCAA | CNTTCTGTNT       | 7332             |      |
| Takifugu_rubripes           | ATAAANCATC                | NTTGGGNGCG         | TAAACAGCT      | GACCTGACT        | CATCATT - - -    | - - - - - CGACTT | TGNTGCGGNA       | 607              |      |
| Bos_taurus                  | CTCAACTANA                | CCTCTCAGGG         | AGATCGAGGT     | TTTTGAGANG       | TTGGCTTCCC       | GTTTCTCCTC       | NTTTGNTCTG       | 443              |      |
| Homo_sapiens                | GTGAACCCAC                | TCTTTTGTAT         | AG - - - - -   | - CTGTACAAG      | TTCTCTTCTC       | - - - - - TTANTA | ATTAGTATAC       | 417              |      |
| Microcebus_murinus          | CTAACCCCTNG               | CNAGCNCNAA         | TAA - - - -    | ACNCT            | TCTTTTGTAT       | TANTCNATCC       | - - - - - TCTGTT | GCTCGTTCTC       | 391  |
| Myotis_lucifugus            | CTGGTCNTCC                | NCGCTGCAA          | T - - - -      | CCCTG            | ACTTACTAAA       | TAGGACAATN       | - - - - - TTTTAA | CTCTTGTCT        | 399  |
| Equus_caballus              | TTTTCTCCCC                | TATTCGGGCTC        | TTA - - - -    | TGT              | TAATAAAAAA       | TTTTTTTTTCC      | CACAAATGTA       | AT - - - - - TCT | 392  |
| Tupaia_belangeri            | GTGACTCTCC                | CATCCGGCT          | GCA - - - -    | CAG              | TAATAAAGTG       | TCTTTCNNTT       | TCTAATCTTA       | GTCTGTCT         | 441  |
| Loxodonta_africana          | GTTTNTCTCT                | TTNCTTGGCC         | AAC - - - -    | TA -             | - AATAAAGNT      | NCCTTTCCCT       | CTCTCTCGCC       | GG - - - - - CCT | 401  |
| Murinae                     | CNCACTCACT                | NACTATCTTG         | AC - - - -     | TGC              | TNTTACANGN       | CNATNAANTN       | - - - - - TTTNTA | ATTGGCTANC       | 447  |
| Canis_lupus_familiaris      | CTTCTGNGN                 | CCACNCGGGG         | AG - - - -     | TCA              | CTGCTTNGT        | NTGTATCTCC       | CGTGTTTTCA       | NACTTAAGN        | 453  |
| Sus_scrofa                  | CCTACTCTC                 | CCCCTGGGCG         | AC - - - -     | CAG              | CTCNTCTAGG       | CCCTAGCC - -     | - - - TGCTNTCA   | CCTCCTNGGC       | 401  |
| Choloepus_hoffmanni         | NACTCCGGGA                | TGCACATTTG         | GG - - - -     | TTG              | TCNCC - TGAA     | TNTGCNCNGA       | AGTAAATAAA       | ATCTTTTGT        | 391  |
| Vicugna_pacos               | TG - - - CCGTAA           | CTCTCCTTTG         | GC - - - -     | TGC              | TTTCTATAAA       | TCTGTTCCCT       | TCTTACTC         | CTCATNTCT        | 417  |
| Gavialis_gangeticus         | AACGAATACC                | AGCTATNT - T       | NGNANGCCT      | GATNCNTCC        | CTA - - - - -    | - - - - -        | - - - - -        | - - - - -        | 470  |
| Mammalia                    | GAACAT - CC               | AGATAGGTA          | GGGGGAACCC     | GAGANACTCG       | GGGCT - - - AGT  | GGCCNGCTTC       | CCCNGGCATA       | 556              |      |
| Passeroidea                 | AGGGGTGNT                 | GTNATAACAC         | AGGGGAACCC     | TATGCTGNG        | AAANTCGGACC      | TGTGTCNAC        | CCAGGCGCGA       | 524              |      |
| Takifugu                    | CAGACTTCAT                | GCCCTGNCA -        | - - - - -      | ATTGACTCT        | GTTATTGTAG       | GGTTATGAAC       | TGCCCCGAG        | CTCTGTAATA       | 506  |
| Pteropus_vampyrus           | TAGANCNTCN                | CAGTTNCTNC         | CGGTCTGCNT     | CCGTCTGCTG       | AAATA - - - -    | ANC              | CGNNTTCTC        | TCTTCAANCA       | 412  |
| Ornithorhynchus             | TANCCGGGCG                | NTCCTTGGTT         | GTNGGCTTNC     | GCCTAATGT        | TTGCACGGAT       | TCTCACNAAG       | GCTTTGAANT       | 2001             |      |
| Oryzotolagus_cuniculus      | - GCTCGG - G              | GCTTCTGACT         | GGATGCCTT      | GCCCTAAN - -     | - - - - -        | - - - - - CAAG   | CCTTGGTATG       | 418              |      |
| Gallus_gallus               | CACTACACNG                | ATGATTTGAT         | GTTAAACTCT     | GACTCAATG -      | - - - - - AGGCAT | TAGAAGCAGT       | ACTATAATC        | 435              |      |
| Hominidae                   | ACNNGNANN                 | NCTNNNNANN         | NNNGNCCN       | NANNCCNAN        | CNNNCNTCN        | NNCNTNAAAC       | CCTTNNANN        | 4171             |      |
| Metatheria                  | NGAGCGGCAA                | NCTNNNNNTN         | GCNNGCCN       | G - - - -        | CCATNT           | NACNNTNNTN       | CNTNNTNAACT      | NCTNNANN         | 491  |
| Rodentia                    | AACCCATCTC                | AATTCCTAGA         | CCGCCTTACA     | AAGGCCCTCT       | TACAATATAC       | CAATCTGGAT       | CTCGAGACCC       | 1789             |      |
| Monodelphis                 | NCNNGNANN                 | CNGCTNTGNN         | GNNGNNNNN      | NAGNNTAAC        | NCNNTNCC         | NNGNTNANN        | NNNGNANN         | 663              |      |
| Consensus                   | CTCACCTTCC                | TATCTCNTGG         | ATGNTTCTGT     | GAACATAATT       | CNCTAATATC       | CTTATTACAC       | CTTCTATTCC       |                  |      |

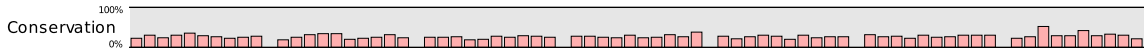

|                             | 7,920       | 7,940      | 7,960       | 7,980       |             |            |            |      |
|-----------------------------|-------------|------------|-------------|-------------|-------------|------------|------------|------|
| Dipodomys_ordii             | TGCTCGGGGC  | CCCCTTNCCG | TCATGGGNTT  | NGCCTNTGAA  | TACNCAAACN  | TCCGAGCTCG | AGCTTGCANT | 520  |
| Laurasiatheria              | -----       | -----      | -----       | -----       | -----       | -----      | -----      | 361  |
| Eutheria                    | --GCCAAAGT  | TTTTCTTTTA | ACA-----    | -----       | -----       | -----      | -----      | 452  |
| Tarsius_syrichta            | --GGCNGTCC  | CTTTCTCGCA | CTCCAGTTAT  | AACA-----   | -----       | -----      | -----      | 487  |
| Muridae                     | NTNNCAGC    | CNNNNNNNCT | NCNCTGAGGA  | ACACCAGAAC  | ACTGTCTAAT  | GNCTGTGTGA | -----      | 2298 |
| Gasterosteus_aculeatus      | ACATTGTGAN  | GTNTNCNC   | NTAAAGNTGC  | TN--ANANCA  | CACAGGGTNA  | TGTCTACGNA | CAGANANAAT | 1963 |
| Felis_silvestris            | GTGCGGTGTG  | GTCTTTTGGC | CAAACCTCA   | TTCCATAAAG  | CCTAGGAGCA  | TAATTCCTAA | CA-----    | 505  |
| Rattus                      | AGATTC----- | GGGGTTCG   | GCCCCCTGT   | CC-CCTGAGT  | GGGATANGTG  | TCTGACCCGN | ATGTCCTNGT | 478  |
| Papio_hamadryas             | AAATCCTCTA  | TGGAGGACCT | CCCCCTTTGT  | CAACCTTACT  | TAACCTCTTT  | TCTCCCTCCA | ATTCTAAGAC | 5267 |
| Pan_troglodytes             | AAATCAT---  | TAGGAGACCT | CCCCCTGCTA  | CTTAGATCCT  | CTTAAACAAA  | ACTGATTTTT | CTTACAAGCT | 3045 |
| Ailuropoda_melanoleuca      | GGANT-----  | GACNNTT    | NTTTCNNTT   | GACACTNTAT  | TACAAATAAA  | CTCTTCTCCT | TGATCTGGTC | 453  |
| Cavia_porcellus             | CCTTCACACA  | AGAGCTGNGT | CCTTGGGGTC  | ATTCCTTG--  | -----CGACG  | CCGGCCTTAC | A-----     | 527  |
| Ictidomys_tridecemlineatus  | CATTTGCATC  | AAGATTGTCT | TCTGTGGTCT  | CTTCNTTNGA  | G--GCCTNGC  | NCGACCTTAC | A-----     | 530  |
| Canis                       | -GTTTGCATC  | GGTGTNGGCT | CCTTGGTGGT  | TTCTCGGATT  | C--GCNATCT  | TGGGCACAAC | A-----     | 479  |
| Felis_catus                 | CC-TTTNTT   | TGNCTCNGCA | GNCAGGTGGT  | CTGTTT----  | -----       | -----      | -----      | 423  |
| Ochotona_princeps           | CT-ANTGACA  | TAGTTGGGTC | AATTAGCTTT  | TTATTGAATA  | T--AACTTTC  | TGGGTTNGCT | GTCGTCTCT  | 495  |
| Cercopithecidae             | CAGATCGACC  | CCCCATGATC | TCCCGGCTGA  | CTACCAGCCG  | TCCGAGGAGCG | CAGGGGCGGC | GTGATCCTCC | 1429 |
| Carnivora                   | TGGCCGTGG   | --CTCCGAAC | CTCACACATT  | CCAA--ACAC  | ATCA-----   | -----      | -----      | 421  |
| Mus                         | CAGCCCCCTG  | ACNNTTNGAN | GNCNAACGCC  | CGGATGACNC  | ANTACCAGAG  | CCTGTTGCTN | ACTGACNGAG | 1471 |
| Mus_musculus                | NGTCTTTGGG  | GTGCTCGCCG | AGTCTCGGGA  | CTTGAGTGGG  | GGTCTCCCTC  | CCGGGCTTTC | A-----     | 478  |
| Rattus_norvegicus           | ATT-----GG  | GTGTTCCG-G | ANTCCTCGGA  | CTAGAGNGAC  | C-AACGGGGA  | AGATTCG--  | --GGTCTTAC | 420  |
| Tursiops_truncatus          | TTTTCTCGG   | NAG--CGTGC | NGCAGCGGNG  | CACGTTCCGG  | AACA-----   | -----      | -----      | 518  |
| Procavia_capensis           | GCTTCTAGGG  | ACA--NGCGG | GATGNACTCT  | CTNCTCCGG   | AACA-----   | -----      | -----      | 442  |
| Primates                    | ANTCTCTCGG  | GTTCAAAAAC | CCCCGGTCCA  | NCCCCGTACG  | ATGGTCCCAT  | ACGGGGTNG  | AGGNNGGNGN | 637  |
| Echinops_telfairi           | AAATNNCANG  | CNTCGGTGTT | TGTTCTTCTC  | CGNCCGAGAC  | CNAAACCAGG  | GNATGNCTAA | CA-----    | 473  |
| Sorex_araneus               | CATTACCATG  | TGTGGCTCTT | TCTCTTCTCG  | C-AACGGGGA  | ACCCTCGGNC  | CCGGNCTTAA | CA-----    | 494  |
| Canidae                     | CTCTCTGTTG  | TCCGCGAGAT | TCATTCTTCC  | ACTCCTGGAG  | AC-AAGAACC  | AAGCTCTCCC | GTATCA---- | 550  |
| Otomur_garnettii            | ATCTCTGTGG  | TCCGTG-GAT | TCATTCTTCC  | AATCCCCGAG  | ACCAAGAACC  | TGGGTACAAC | A-----     | 413  |
| Gallus                      | TNCTGNNAGC  | AGTGCNAGTC | NGTGNNGCA   | ATCCCNNTTG  | CATCNGGCTN  | TACCGCCGTC | GTAATAAATA | 580  |
| Callithrix_jacchus          | CATGCTTCGA  | -ANTTTGAGA | NGCTNAGAAC  | T-CTTCCGCG  | AGGT-----   | -----      | -----      | 495  |
| Crocodylus_porosus          | TGTGTCTCAG  | TAGATTNCTT | TGNTGTCTCNG | GGCCTCCATG  | GANTCGAACN  | GCGTATTGTG | CAACA----  | 527  |
| Erinaceus_europaeus         | -----       | -----      | -----       | -----       | -----       | -----      | -----      | 420  |
| rnd-6_family-7426-LTR-ERV1  | GAAGGTTCAA  | GACCTTTTGC | TTTTGGATGT  | TACTCCTTTG  | TCTCTCGGCT  | TNGAAACCCG | CGGAGGTGTN | 1032 |
| Esox_lucius                 | G-CATAATAA  | TTAATAAACT | TGTTAA--AT  | TGTGC--CTA  | GAGN----AT  | TTTGTCTCTT | TACANCTAAT | 495  |
| Salmo_salar                 | A-CG-GATTG  | TGAGGTGGTT | TGTTTA--AT  | TGTGTGCTG   | AAGCTTGGAT  | TTTGTTCAT  | GATTACTATT | 643  |
| Didelphidae                 | T-CATACCTT  | GAGGGTTAGT | TGTTTATGAG  | CGGNAATTNC  | AATGTTTTTT  | TTTGGTTTTT | TTNTACATGT | 584  |
| Latimeria_chalumnae         | ACNGTNCNCN  | GTANTANACA | CNNCCAANAC  | TGNTG--TAN  | AATGCCAANG  | TCNNTCNTCT | NNNTCTAAAT | 1505 |
| Monodelphis_domestica       | GGCATAAGTT  | TTAATAGAAA | TTT--AAAG   | TGTT-----   | AATNCTAAA-  | --TCTTCTCT | ATCTTCAATT | 496  |
| Macropus_eugenii            | TTTTGNTTTT  | CTTTTTCTAC | CTT--GAGT   | CGTC--TTC   | ANTTTCAATT  | TGAGTANAGT | TTTTCTTNC  | 503  |
| Alligator_mississippiensis  | CCTTTTAGAG  | NTGATTAACC | TCT--GTGC   | TCATANTTN   | AATCTN-TAC  | TGGATCATT  | NAACTCGTTA | 532  |
| Chrysemys_picta_belli       | GATTTGAGGN  | ATGGTTTTCT | NCTTCAGTAC  | AAGTGTCTCT  | TGNCAGCTGT  | TCTTTCNTT  | CTNCACAG-G | 2741 |
| Danio_rerio                 | ATTATNAACT  | AT-ATAANTA | TATTCATTTT  | TAATTAATAA  | AAATCNTTAA  | ATAGGTANCT | AATATAAAGT | 669  |
| Taeniopygia                 | GCCAGNNGTC  | TT-AATAAAA | TATCCATTNT  | TTATNTAAAA  | AGA--CTTNA  | TGAGTNTATT | TGATCAATT  | 531  |
| Dasyus_novemcinctus         | ATTTTTCTT   | CTCAANACNA | TTCTTGAGTC  | CTGGCCTTTC  | TATACGCCAA  | TAANTGAAT  | TCTCTCGCTT | 509  |
| LTR_XT                      | ANCTNCNATT  | AAACTGACCT | ATCNACAGT   | TTTTTTTTAC  | CAGTANTNAN  | TNNTNGCCN  | TNNAAGCAT  | 494  |
| Haplorhini                  | TCTCTCTCAG  | TTTCCAGCCG | TAAATCAGTC  | GTGGTATCAA  | CTAGACGCTC  | CAAATGTTTG | GAAAGCACCG | 7874 |
| Catarrhini                  | ATTTAGTAAA  | TTCCAAAAGT | TGCAAACCGT  | GTGGAGCCAC  | CGGAGTCCC   | ACCGGACTG  | GACAGCCCC  | 7002 |
| Anolis_carolinensis         | -----       | -----      | -----       | -----       | -----       | -----      | -----      | 1184 |
| Murine_leukemia_virus       | GC--TCCAGG  | CAGCCATACA | TACAGACCTT  | GGGGCCCTTAG | AAAAATCAGT  | CAGTGCCCTA | GAAAAGTCTC | 7156 |
| Phascolarctos_cinereus      | GCC-TCCAGA  | TTGCCATGGA | TACAGACCTT  | AGGGCCCTTC  | AAGACTCCAT  | AAGTAAACTA | GAGGATCTCT | 6976 |
| Estrildidae                 | GTTTNNATT-  | TNCTTAACT  | AGNCTAGCCT  | CTGTNTTAG   | TTAGTCTTAA  | TAAAGCATCA | -----      | 482  |
| Xenopus_Silurana_tropicalis | NTTNTCNTNA  | TTATTCATNT | CATTATNCCT  | TTCTATNTG   | TTANGNTNCN  | GATGTANTTN | NTTTTTTAGA | 784  |
| I_XT                        | TNNGCNAACN  | TTATNCATTN | CAGGATCCCA  | TTCTTNTGTA  | T-ATNNTANA  | GATGNANTTG | CTGNGTTAGA | 7401 |
| Takifugu_rubripes           | TCTCNGGCTN  | CAATTCGTTC | GGCCTAGGCA  | TAGGATCTN   | TGACTTAAAG  | AAAAGCATAA | GTTTATNAAN | 677  |
| Bos_taurus                  | CTTCCAATAA  | AAGCCNTA-  | CTTTCTTTTT  | TTCCAAACT   | CGGTGTCTTT  | NTATTTTTTG | GCCTCAGCG  | 511  |
| Homo_sapiens                | CTTT--ATA   | AATCCTTTAC | TTTTTCTTTT  | TTCTGC----  | -----       | -----      | -----      | 450  |
| Microcebus_murinus          | TTTGTCTCGN  | GGACTGACGA | NTTNTGCGCA  | TTGAACA---- | -----       | -----      | -----      | 428  |
| Myotis_lucifugus            | TTTCGTTAGT  | GG--TGACG  | TNTTTCNGTC  | TTGCA-----  | -----       | -----      | -----      | 432  |
| Equus_caballus              | CTAGATTTTT  | AG--CTAAAC | TTTTCGCTTC  | NAGTA-AACA  | GAGCCCTTTT  | GTTTGGTTAC | A-----     | 450  |
| Tupaia_belangeri            | CTNGTTTTTT  | GG--CTTTGT | TAATCTCNT   | TAAAT-ATCA  | GN-TCTGGTN  | GCACTTTGC  | A-----     | 498  |
| Loxodonta_africana          | CTTTTTTATT  | GG--CTAATA | NAGTCNCGCC  | GAGNAGAACC  | TGGGAGCTTC  | TCCCGTAAAC | A-----     | 460  |
| Murinae                     | NCTGGGNGT   | TGGCCGNGCC | TTTCTTGT    | CGGACTGTNA  | CN-----     | -----      | -----      | 489  |
| Canis_lupus_familiaris      | CCAAATAAAC  | GCTTNTCTGT | TTTACTNTTC  | NGCCTTGT    | TNTCTTAACT  | TGNTTACAN  | CAAGAGAACC | 523  |
| Sus_scrofa                  | CTGGCTTAAT  | AAAGCTATCT | TTGTCTCTT   | CACCAAGNC   | TCTCC-GGCC  | AGGT-----  | -----      | 454  |
| Choloepus_hoffmanni         | CCTCCACAAT  | CGGGTNAAGT | GTTATTCCTN  | --TTAGGCA   | AAACC-----  | CNGCTAACA- | -----      | 444  |
| Vicugna_pacos               | CTCGAATAAT  | TTTTTTTTGC | GTTCGCGAAG  | AACNAGGCA   | NNTTT--GT   | TGCTCAACA- | -----      | 474  |
| Gavialis_gangeticus         | -----       | -----      | -----       | -----       | -----       | -----      | -----      | 470  |
| Mammalia                    | GCNNGGGGAG  | GCTGCAAGCC | TCTAGGAGAA  | GCCCCGCATN  | CGGCNGGCAC  | NNGTCCAACA | TGGCGCGGGA | 626  |
| Passeroidea                 | TCCNNGGCTC  | GGCACTGNCC | T-TTTGCTTG  | TGGCTCNCTN  | AGATAGAANC  | TGCATCNCTA | TATAAAAAAT | 593  |
| Takifugu                    | TTTGTATCTT  | GAATTGGTTC | TATTTGCTAA  | ATACATTTTG  | AAATTGGCAT  | T---TTTCTT | CTTGAAGTCT | 573  |
| Pteropus_vampyrus           | TTTCGTTGTT  | AAA--TCT   | TTCTTTNTTT  | TGATGTCCCG  | GAGCACTTGT  | T---TTACTG | CTCAACA--  | 472  |
| Ornithorhynchus             | TTGCCATGCG  | ANNNGGGCCT | TGTGGC----  | -GAACCNGNG  | GTTANTTNAC  | TTCAGCAGGA | GNGCCNGTGT | 2066 |
| Oryctolagus_cuniculus       | TTNTTTTAAA  | AAAAATACTC | TCTGCC----  | -TTNCGGCC   | TGTANTTTTT  | TCTTGCCTGT | ANGACAAAAA | 483  |
| Gallus_gallus               | TATTTACAGG  | AAAGGATGGC | TATA-----   | --AACCCAAA  | AGTAC--AAG  | GCCAGGCTAT | CAGTTAAAT  | 495  |
| Hominidae                   | NTTNCANGNG  | CNNCAGAGG  | TNNNGNTCAT  | NNNNNNNAAN  | AGTNNCCANN  | NCNCAANNNN | CCNNNNNGCN | 4241 |
| Metatheria                  | TCAANNTTT   | NNTNGAGNCT | NNTAANTTNT  | TAGTNNANN   | NNNNNNCANN  | NCCAGATCG  | NANNTTNTCT | 561  |
| Rodentia                    | CAGATGGAAA  | ACAACCTCTT | ATGACCTACT  | TCTTCCAGAG  | TTTCCCTGAT  | ATTAGGGCCA | AACTTAAACG | 1859 |
| Monodelphis                 | NCTANTNAAT  | NNNTNNGNGN | TNNNCTAGN   | TNNCTACCC   | TATCCTCTCT  | CTGATTTTCT | TACTTCACTC | 733  |
| Consensus                   | CTTTTTTATG  | TTACTTNACT | TTTTCCCTTT  | TTCCCTTGTG  | AATACC-AAT  | TCGGTCTTT- | -----      |      |

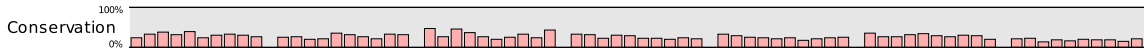



|                             | 8,000       |            |             | 8,020      |             |             | 8,040      |  |      |  |
|-----------------------------|-------------|------------|-------------|------------|-------------|-------------|------------|--|------|--|
| Dipodomys_ordii             | ATCANCTCCC  | GNGTCTGTGC | TTCGGTCTCG  | GCCGGTCCGT | GGTCTTTCNG  | GATAGAGTTN  | NNTATNTGGG |  | 590  |  |
| Laurasiatheria              | -----       | -----      | -----       | -----      | -----       | -----       | -----      |  | 361  |  |
| Eutheria                    | -----       | -----      | -----       | -----      | -----       | -----       | -----      |  | 452  |  |
| Tarsius_syrichta            | -----       | -----      | -----       | -----      | -----       | -----       | -----      |  | 487  |  |
| Muridae                     | CCCAGTACCA  | GCCCTACTC  | CTGNCCACC   | CTCGAGTCTG | GTTTGAGAAA  | CCCACCACCA  | TCAATCCTGC |  | 2368 |  |
| Gasterosteus_aculeatus      | CTNACANNNTN | GNCNGCGCNN | NGACANNNGTA | NGNNNACTNG | NCTNNTTAGAC | ATGCCNAATG  | TCACNTNTAN |  | 2033 |  |
| Felis_silvestris            | -----       | -----      | -----       | -----      | -----       | -----       | -----      |  | 505  |  |
| Rattus                      | TNA---ATAA  | ACCTAACTCT | TGCTGATTAC  | ATCGAGAGCG | GTCTC---T   | CGTGAGTCNG  | GGC---CT   |  | 537  |  |
| Papio_hamadryas             | TGACCTACAG  | GCCCGGCTAA | -AAGGACTAC  | AAGCAGTACA | GGCCCAAATC  | TGGGCCCCCT  | TGGCAGAAGT |  | 5336 |  |
| Pan_troglodytes             | ACAGAAATCA  | AAATTGGCAA | -GCTGAAGAC  | TATAAGACCA | GCCCCACGA   | CACACCTACC  | AGGGGAGACT |  | 3114 |  |
| Ailuropoda_melanoleuca      | TGAATTCTT-  | -----      | -----       | -----      | -----       | -----       | -----      |  | 462  |  |
| Cavia_porcellus             | -----       | -----      | -----       | -----      | -----       | -----       | -----      |  | 527  |  |
| Ictidomys_tridecemlineatus  | -----       | -----      | -----       | -----      | -----       | -----       | -----      |  | 530  |  |
| Canis                       | -----       | -----      | -----       | -----      | -----       | -----       | -----      |  | 479  |  |
| Felis_catus                 | -----       | -----      | -----       | -----      | -----       | -----       | -----      |  | 423  |  |
| Ochotona_princeps           | GG---CTTGA  | CAGGATCCTA | ACA-----    | -----      | -----       | -----       | -----      |  | 515  |  |
| Cercopithecidae             | GGACCCCAAG  | CGATAGCCTC | GCTTGAAATT  | AACGATAGCT | AGCCAACATT  | GGTTACCAA   | GGATAAATTT |  | 1499 |  |
| Carnivora                   | -----       | -----      | -----       | -----      | -----       | -----       | -----      |  | 421  |  |
| Mus                         | TGACTTTGCG  | CCCGCTCAA  | CCTCCCTCTC  | CAGCGAGCCA | ATGGGCTGGC  | GAAGAACTGG  | GGACTAGACC |  | 1541 |  |
| Mus_musculus                | -----       | -----      | -----       | -----      | -----       | -----       | -----      |  | 478  |  |
| Rattus_norvegicus           | -----       | -----      | -----       | -----      | -----       | -----       | -----      |  | 420  |  |
| Tursiops_truncatus          | -----       | -----      | -----       | -----      | -----       | -----       | -----      |  | 518  |  |
| Procavia_capensis           | -----       | -----      | -----       | -----      | -----       | -----       | -----      |  | 442  |  |
| Primates                    | CCGACCAAG   | AGCCACCTGG | CCGTGGACTC  | TTCA-----  | -----       | -----       | -----      |  | 671  |  |
| Echinops_telfairi           | -----       | -----      | -----       | -----      | -----       | -----       | -----      |  | 473  |  |
| Sorex_araneus               | -----       | -----      | -----       | -----      | -----       | -----       | -----      |  | 494  |  |
| Canidae                     | -----       | -----      | -----       | -----      | -----       | -----       | -----      |  | 550  |  |
| Otolemur_garnettii          | -----       | -----      | -----       | -----      | -----       | -----       | -----      |  | 413  |  |
| Gallus                      | ACATACCTGT  | TTTTATNANT | NTTTGTGTGT  | ATAGNNTTG  | ATTCCGCACN  | TCA-----    | -----      |  | 633  |  |
| Callithrix_jacchus          | -----       | -----      | -----       | -----      | -----       | -----       | -----      |  | 495  |  |
| Crocodylus_porosus          | -----       | -----      | -----       | -----      | -----       | -----       | -----      |  | 527  |  |
| Erinaceus_europaeus         | -----       | -----      | -----       | -----      | -----       | -----       | -----      |  | 420  |  |
| rnd-6_family-7426-LTR-ERV1  | ATGACCCGGT  | TGATNCCNAG | AAACACNACC  | ATCCCAACCA | AGAAAGAGCA  | GGTNTTCTCN  | ACCTACTCGG |  | 1102 |  |
| Esox_lucius                 | TTCTTAAAGG  | GTTTTGATAG | ATGGAATTAC  | CATCACA--- | -----       | -----       | -----      |  | 532  |  |
| Salmo_salar                 | CTCTTAA---  | ---TTTGCAA | ACGGCACTAC  | CTGCTGACAG | TGTTGAATCC  | AAATAAAGTA  | CATTAACCGC |  | 708  |  |
| Didelphidae                 | CATAAAACCA  | GTATTCTCTA | TTACCATAAC  | TACCCTAACT | AATAAGNNTG  | NATTCCAT--  | -----      |  | 642  |  |
| Latimeria_chalumnae         | CGACAGCAG-  | --ACGGAGAA | ATTGTTTTTT  | CTCCTAAGCA | ACTAACAACT  | CGGACAACCA  | GATTTATTTT |  | 1572 |  |
| Monodelphis_domestica       | TATAAAAAA-  | --ATATAAAA | ATGATTAAGA  | ACTTTCGGGG | ACTTAAGGCT  | -----       | -----      |  | 543  |  |
| Macropus_eugenii            | CACACA----- | -----      | -----       | -----      | -----       | -----       | -----      |  | 509  |  |
| Alligator_mississippiensis  | CATACNCATG  | CCCGTTGCCT | ACCCCTACGA  | CATA-----  | -----       | -----       | -----      |  | 566  |  |
| Chrysemys_picta_belli       | TNNACCAAAG  | GTTGCCANCC | TCTCCTGCCG  | GANACCCTTG | TCCACTCCTT  | GGAGCCAGGT  | GACTCGGTTT |  | 2811 |  |
| Danio_rerio                 | TAATTTAAAA  | AAAATCAAA  | TAATACAGAA  | -----      | -----       | -----       | -----      |  | 699  |  |
| Taeniopygia                 | TATGACA---  | -----      | -----       | -----      | -----       | -----       | -----      |  | 538  |  |
| Dasyus_novemcinctus         | CAC-----    | -----      | -----       | -----      | -----       | -----       | -----      |  | 512  |  |
| LTR_XT                      | ATAAATAAAA- | -----      | -----       | -----      | -----       | -----       | -----      |  | 503  |  |
| Haplorrhini                 | GCAGGACTAT  | ATTGGATCTG | TGGGACAAAA  | GCCTACCAAC | TATT-GCCCG  | AGAAGTGGAC  | CGGAGCCTGT |  | 7943 |  |
| Catarrhini                  | ACTGGATTAT  | ACTGGATATG | TGGGCATAGA  | GCTTAGCCCA | AATT-ACCTG  | ACCGGTGGGC  | AGGTAGTTGT |  | 7071 |  |
| Anolis_carolinensis         | -----       | -----      | -----       | -----      | -----       | -----       | -----      |  | 1184 |  |
| Murine_leukemia_virus       | TGACCTCGTT  | GTCTGAGGTG | GTCCACAGAG  | ACCGGAGAGG | ATTAGATCTG  | CTGTTCCCTAA | AAGAAGGAGG |  | 7226 |  |
| Phascolarctos_cinereus      | TAACCTCCCT  | GTCTGAAGTA | GTGCTCCAGA  | ATAGGAGAGG | CCTTGATCTG  | CTATTTTGA   | AGGAAGGGGG |  | 7046 |  |
| Estrildidae                 | -----       | -----      | -----       | -----      | -----       | -----       | -----      |  | 482  |  |
| Xenopus_Silurana_tropicalis | TGNAAGNCT   | GTAGCAATTA | TGCCTATA--  | -----      | -----       | -----       | -----      |  | 812  |  |
| I_XT                        | TGNAANCNT   | GNAGGCAATT | CAANACTGAC  | ACTNAACNNN | NAGAAGTGAN  | CNNAANAGAN  | TTCTNGNTNA |  | 7471 |  |
| Takifugu_rubripes           | GTNNTNNGGC  | ANAGGGAAAA | AGCCACTACA  | -----      | -----       | -----       | -----      |  | 707  |  |
| Bos_taurus                  | CGGCAGATGA  | CTTTCGGTAA | CA-----     | -----      | -----       | -----       | -----      |  | 533  |  |
| Homo_sapiens                | -----       | -----      | -----       | -----      | -----       | -----       | -----      |  | 450  |  |
| Microcebus_murinus          | -----       | -----      | -----       | -----      | -----       | -----       | -----      |  | 428  |  |
| Myotis_lucifugus            | -----       | -----      | -----       | -----      | -----       | -----       | -----      |  | 432  |  |
| Equus_caballus              | -----       | -----      | -----       | -----      | -----       | -----       | -----      |  | 450  |  |
| Tupaia_belangeri            | -----       | -----      | -----       | -----      | -----       | -----       | -----      |  | 498  |  |
| Loxodonta_africana          | -----       | -----      | -----       | -----      | -----       | -----       | -----      |  | 460  |  |
| Murinae                     | -----       | -----      | -----       | -----      | -----       | -----       | -----      |  | 489  |  |
| Canis_lupus_familiaris      | CTGTTCCGTA  | ACA-----   | -----       | -----      | -----       | -----       | -----      |  | 536  |  |
| Sus_scrofa                  | -----       | -----      | -----       | -----      | -----       | -----       | -----      |  | 454  |  |
| Choloepus_hoffmanni         | -----       | -----      | -----       | -----      | -----       | -----       | -----      |  | 444  |  |
| Vicugna_pacos               | -----       | -----      | -----       | -----      | -----       | -----       | -----      |  | 474  |  |
| Gavialis_gangeticus         | -----       | -----      | -----       | -----      | -----       | -----       | -----      |  | 470  |  |
| Mammalia                    | GCAATAGTGC  | AGCACTGGCG | GAGGGAGGTG  | GCTAGATAGA | TGAGCCTGAG  | GCAGCGCTCC  | TGGCTCCCCA |  | 696  |  |
| Passeroidea                 | TATNTTATT   | AATTTTTAAT | TTGGCTNGAT  | CAATTTTTAN | CTATAACA--  | -----       | -----      |  | 641  |  |
| Takifugu                    | TCATTTCAAAG | AACACGCGGA | TTGGCAGTGA  | CACACGAGAG | GTATTGCGAT  | CCAACA---   | -----      |  | 629  |  |
| Pteropus_vampyrus           | -----       | -----      | -----       | -----      | -----       | -----       | -----      |  | 472  |  |
| Ornithorhynchus             | CCC--ACGGN  | ACTATGCGGG | CTTTAGGCTG  | CAGACCCTG  | CTGCGTATCC  | AGTGACCACA  | CGGGACTTAG |  | 2134 |  |
| Oryctolagus_cuniculus       | CCCG-ACGTC  | AC-----    | -----       | -----      | -----       | -----       | -----      |  | 494  |  |
| Gallus_gallus               | CCTGGGTGTT  | GTC-----   | -----       | -----      | -----       | -----       | -----      |  | 508  |  |
| Hominiidae                  | CNAGGAAATN  | NNCTANCNGA | CNCNACNNNT  | NNGNCNTNG  | NNNTNANNTC  | TGCCCCNGCC  | NCGGAGCNCN |  | 4311 |  |
| Metatheria                  | CNANNACA--  | -----      | -----       | -----      | -----       | -----       | -----      |  | 569  |  |
| Rodentia                    | TCTAGAGAGG  | GGACCCTGA  | CTCCACAGGC  | AGAAGTCTTA | GCGGTGGCCT  | TTAAGGTATA  | CCATGGGAGA |  | 1929 |  |
| Monodelphis                 | TTTCTATATT  | TTGTAAATAA | AT-TGTAAT   | AAATCTCTT  | GGAAATAA--  | TTAAATTCCT  | GGCGACCCTA |  | 800  |  |
| Consensus                   | -----       | -----      | -----       | -----      | -----       | -----       | -----      |  |      |  |
| Conservation                | 100%        | -----      | -----       | -----      | -----       | -----       | -----      |  |      |  |
|                             | 0%          | -----      | -----       | -----      | -----       | -----       | -----      |  |      |  |

|                             | 8,060      | 8,080      | 8,100       | 8,120         |            |             |              |      |
|-----------------------------|------------|------------|-------------|---------------|------------|-------------|--------------|------|
| Dipodomys_ordii             | TACAACA    |            |             |               | 597        |             |              |      |
| Laurasiatheria              |            |            |             |               | 361        |             |              |      |
| Eutheria                    |            |            |             |               | 452        |             |              |      |
| Tarsius_syrichtha           |            |            |             |               | 487        |             |              |      |
| Muridae                     | TACCCTCTTG | CCTGATGACG | ACCCGCAGGT  | GCTCATCCAT    | GACTGTCCAG | AGATGAAAGA  | TAAAACCAGG   | 2438 |
| Gasterosteus_aculeatus      | ACNCTNAAGT | NTCCANANCN | CNGCATGATT  | GCTANCGACT    | NNNGNGGATG | ANGAGGANA   | NAANTGTTTG   | 2103 |
| Felis_silvestris            |            |            |             |               |            |             |              | 505  |
| Rattus                      | GCGCCCTCC  | GAGACCT    | -GAGCGAGCG  | TCCNCTCCAG    | GTCGGNGGT  | CTTTCA      |              | 589  |
| Papio_hamadryas             | GTACCGGCCA | GGACATTCCG | AGACCAGCCA  | CCCCTTCCAG    | GTGGGGGACT | CCGTCTACGT  | TAGACGACAC   | 5406 |
| Pan_troglodytes             | GGTCGGTTAA | CGACACC    | -GACTAGAC   | - - - - CCGG  | TGGAAGGACC | ACGTCTCCT   | - - GACCACAC | 3170 |
| Ailuropoda_melanoleuca      |            |            |             |               |            |             |              | 462  |
| Cavia_porcellus             |            |            |             |               |            |             |              | 527  |
| Ictidomys_tridecemlineatus  |            |            |             |               |            |             |              | 530  |
| Canis                       |            |            |             |               |            |             |              | 479  |
| Felis_catus                 |            |            |             |               |            |             |              | 423  |
| Ochotona_princeps           |            |            |             |               |            |             |              | 515  |
| Cercopithecidae             | GCTCCAATGC | ATTCATGGCA | CAGACCTCGG  | AACGCAGCG     | GGCCCCGCC  | CCATCAGAA   | CTGGAActCC   | 1569 |
| Carnivora                   |            |            |             |               |            |             |              | 421  |
| Mus                         | TTGCCGGTGG | TCACGAGGAG | AGCTTTGGTG  | AGGAAAGCGG    | GGCAGTGTGA | GAAGTATTGG  | GCAGCTCGAG   | 1611 |
| Mus_musculus                |            |            |             |               |            |             |              | 478  |
| Rattus_norvegicus           |            |            |             |               |            |             |              | 420  |
| Tursiops_truncatus          |            |            |             |               |            |             |              | 518  |
| Procavia_capensis           |            |            |             |               |            |             |              | 442  |
| Primates                    |            |            |             |               |            |             |              | 671  |
| Echinops_telfairi           |            |            |             |               |            |             |              | 473  |
| Sorex_araneus               |            |            |             |               |            |             |              | 494  |
| Canidae                     |            |            |             |               |            |             |              | 550  |
| Otolemur_garnettii          |            |            |             |               |            |             |              | 413  |
| Gallus                      |            |            |             |               |            |             |              | 633  |
| Callithrix_jacchus          |            |            |             |               |            |             |              | 495  |
| Crocodylus_porosus          |            |            |             |               |            |             |              | 527  |
| Erinaceus_europaeus         |            |            |             |               |            |             |              | 420  |
| rnd-6_family-7426-LTR-ERV1  | ACAACCAAA  | CGCGTNTTG  | ATCCAGGTNT  | ACGAAGGTGA    | AAGAGCGAGG | ACNAGGGACA  | ACAANCTTGT   | 1172 |
| Esox_lucius                 |            |            |             |               |            |             |              | 532  |
| Salmo_salar                 | ACTTCTAACA | GAGTCTATTG | GACAGGGTAC  | TCATTAGTGA    | ACGACAGATT | AATTGAGATG  | GAAATTGCAA   | 778  |
| Didelphidae                 |            |            |             |               |            |             |              | 642  |
| Latimeria_chalumnae         | ATAACCAAGT | TATTAACTTT | TTTTCAAACA  | TGAGTATCAA    | TATCAACATG | TCGAACTCTA  | CAAGGCCAAT   | 1642 |
| Monodelphis_domestica       |            |            |             |               |            |             |              | 543  |
| Macropus_eugenii            |            |            |             |               |            |             |              | 509  |
| Alligator_mississippiensis  |            |            |             |               |            |             |              | 566  |
| Chrysemys_picta_belli       | TCTCGCAGAG | CCTCCGAGGT | GGAAGGGCCC  | ACGTCCTGCT    | CCCACACGCG | AAGTAGGACC  | CTGGATCATT   | 2881 |
| Danio_rerio                 |            |            |             |               |            |             |              | 699  |
| Taeniopygia                 |            |            |             |               |            |             |              | 538  |
| Dasybus_novemcinctus        |            |            |             |               |            |             |              | 512  |
| LTR_XT                      |            |            |             |               |            |             |              | 503  |
| Haplorrhini                 | GTGTTAGGGA | CAATAAGACC | GTCCTTCTTC  | TTGCTCCAC     | TGAAACAAGG | GGAAGATTTA  | AGTTACCCAG   | 8013 |
| Catarrhini                  | GTTATTGGCA | CTATTAACC  | ATCTTTCTTC  | CTACTGCCA     | TAAAAACAGG | CGAACTCCTG  | GGCTTCCCTG   | 7141 |
| Anolis_carolinensis         |            |            |             |               |            |             |              | 1184 |
| Murine_leukemia_virus       | ATTATGTGCT | GCCCTAAAAG | AGAATGCTG   | TTTCTACGCG    | GACCACACTG | GGTAGTAAG   | GGATAGCATG   | 7296 |
| Phascolarctos_cinereus      | CCTTTGTGCA | GCCCTAAAAG | AGGAATGCTG  | TTTCTATGTT    | GACCACACTG | GCCTGGTGCG  | AGACTCCATG   | 7116 |
| Estrildidae                 |            |            |             |               |            |             |              | 482  |
| Xenopus_Silurana_tropicalis |            |            |             |               |            |             |              | 812  |
| L_XT                        | GAAAAAATAT | ATGTTAAGAT | TTTGCAACAAC | ANGNAGGA      |            |             |              | 7509 |
| Takifugu_rubripes           |            |            |             |               |            |             |              | 707  |
| Bos_taurus                  |            |            |             |               |            |             |              | 533  |
| Homo_sapiens                |            |            |             |               |            |             |              | 450  |
| Microcebus_murinus          |            |            |             |               |            |             |              | 428  |
| Myotis_lucifugus            |            |            |             |               |            |             |              | 432  |
| Equus_caballus              |            |            |             |               |            |             |              | 450  |
| Tupaia_belangeri            |            |            |             |               |            |             |              | 498  |
| Loxodonta_africana          |            |            |             |               |            |             |              | 460  |
| Murinae                     |            |            |             |               |            |             |              | 489  |
| Canis_lupus_familiaris      |            |            |             |               |            |             |              | 536  |
| Sus_scrofa                  |            |            |             |               |            |             |              | 454  |
| Choloepus_hoffmanni         |            |            |             |               |            |             |              | 444  |
| Vicugna_pacos               |            |            |             |               |            |             |              | 474  |
| Gavialis_gangeticus         |            |            |             |               |            |             |              | 470  |
| Mammalia                    | TGGCCTGCGC | GTGGCNTGCA | GGGATCCAG   | AAGTTCCNC     | GTGCCCGGT  | GAGGGACGC   | GGAGGTGCTG   | 766  |
| Passeroidea                 |            |            |             |               |            |             |              | 641  |
| Takifugu                    |            |            |             |               |            |             |              | 629  |
| Pteropus_vampyrus           |            |            |             |               |            |             |              | 472  |
| Ornithorhynchus             | CCTGGGAAG  | AGGCACACC  | GCTGGGCTG   | CTCGACCGTC    | CGAACACTGG | GCTCTGAGCG  | GGACCCGTGC   | 2204 |
| Oryctolagus_cuniculus       |            |            |             |               |            |             |              | 494  |
| Gallus_gallus               |            |            |             |               |            |             |              | 508  |
| Hominidae                   | CGCNNTGTNN | CCNNNNGGNN | CACGCACCCC  | TNCCNNNNNN    | NCNNAGGNGA | CCNTCCANCT  | CATNTCCAAC   | 4381 |
| Metatheria                  |            |            |             |               |            |             |              | 569  |
| Rodentia                    | GATGAAAAAG | CCTGAAAACA | AAAAATACC   | - - - - TGATG | CTGGCTAAGG | CCTTTTCAGCC | - - GGCCATA  | 1989 |
| Monodelphis                 | TTTTAAATAT | AATCCAGTCC | AACCTTTTTA  | TAAATTAACC    | CCTTTTCCCC | CCTTACA     |              | 857  |
| Consensus                   |            |            |             |               |            |             |              |      |
| Conservation                | 100%       |            |             |               |            |             |              | 0%   |



|                             | 8,140       | 8,160      | 8,180      |            |            |             |            |            |      |
|-----------------------------|-------------|------------|------------|------------|------------|-------------|------------|------------|------|
| Dipodomys_ordii             | -----       | -----      | -----      | 597        |            |             |            |            |      |
| Laurasiatheria              | -----       | -----      | -----      | 361        |            |             |            |            |      |
| Eutheria                    | -----       | -----      | -----      | 452        |            |             |            |            |      |
| Tarsius_syrichta            | -----       | -----      | -----      | 487        |            |             |            |            |      |
| Muridae                     | TACGTGGGAG  | CTGCAGTAGT | TACTTTAACT | GAAATGATT  | GGGCCCAAGC | CAGGTACCTC  | AGCCCAGAGA | 2508       |      |
| Gasterosteus_aculeatus      | GCTGTCAAAG  | CTGAGNNCAC | ACTTNGGACG | GACACAGNNG | ACACTCTACT | GCTTAAACAAC | TACNTNGTNA | 2173       |      |
| Felis_silvestris            | -----       | -----      | -----      | -----      | -----      | -----       | -----      | 505        |      |
| Rattus                      | -----       | -----      | -----      | -----      | -----      | -----       | -----      | 589        |      |
| Papio_hamadryas             | CGTTTCTCAGG | GACTGGAGCC | TCGGTGGAAA | GGACCCTACA | TTGTTCTCCT | GACCACACCC  | ACAGCCATAA | 5476       |      |
| Pan_troglodytes             | CCACCGCCTG  | AAGTGAAGGT | TGCCTGGATC | CACACCCAC- | --GTAACAGT | GGACCCACCG  | ATGGGCTCCC | 3237       |      |
| Ailuropoda_melanoleuca      | -----       | -----      | -----      | -----      | -----      | -----       | -----      | 462        |      |
| Cavia_porcellus             | -----       | -----      | -----      | -----      | -----      | -----       | -----      | 527        |      |
| Ictidomys_tridecemlineatus  | -----       | -----      | -----      | -----      | -----      | -----       | -----      | 530        |      |
| Canis                       | -----       | -----      | -----      | -----      | -----      | -----       | -----      | 479        |      |
| Felis_catus                 | -----       | -----      | -----      | -----      | -----      | -----       | -----      | 423        |      |
| Ochotona_princeps           | -----       | -----      | -----      | -----      | -----      | -----       | -----      | 515        |      |
| Cercopithecidae             | AAGTTAATCA  | CACGTATCAA | CTGCTGAACC | CCCCGGGCCG | GATGGAATGA | TTACATCCAT  | TACTCTTTGT | 1639       |      |
| Carnivora                   | -----       | -----      | -----      | -----      | -----      | -----       | -----      | 421        |      |
| Mus                         | GACTCGCCAA  | AGGCACTTCT | AAAGCTTGGC | AGAGGAGCTA | ATTAAGTAC  | AGCTAGCTTT  | TGCCACGCCA | 1681       |      |
| Mus_musculus                | -----       | -----      | -----      | -----      | -----      | -----       | -----      | 478        |      |
| Rattus_norvegicus           | -----       | -----      | -----      | -----      | -----      | -----       | -----      | 420        |      |
| Tursiops_truncatus          | -----       | -----      | -----      | -----      | -----      | -----       | -----      | 518        |      |
| Procavia_capensis           | -----       | -----      | -----      | -----      | -----      | -----       | -----      | 442        |      |
| Primates                    | -----       | -----      | -----      | -----      | -----      | -----       | -----      | 671        |      |
| Echinops_telfairi           | -----       | -----      | -----      | -----      | -----      | -----       | -----      | 473        |      |
| Sorex_araneus               | -----       | -----      | -----      | -----      | -----      | -----       | -----      | 494        |      |
| Canidae                     | -----       | -----      | -----      | -----      | -----      | -----       | -----      | 550        |      |
| Otomur_garnettii            | -----       | -----      | -----      | -----      | -----      | -----       | -----      | 413        |      |
| Gallus                      | -----       | -----      | -----      | -----      | -----      | -----       | -----      | 633        |      |
| Callithrix_jacchus          | -----       | -----      | -----      | -----      | -----      | -----       | -----      | 495        |      |
| Crocodylus_porosus          | -----       | -----      | -----      | -----      | -----      | -----       | -----      | 527        |      |
| Erinaceus_europaeus         | -----       | -----      | -----      | -----      | -----      | -----       | -----      | 420        |      |
| rnd-6_family-7426-LTR-ERV1  | TGGGCGAATT  | TGAGCTCTCT | GGTATCCCTC | CTGCACCAAG | GGGNGTTCCT | CAAAATCGANG | TCCGCTTCGA | 1242       |      |
| Esox_lucius                 | -----       | -----      | -----      | -----      | -----      | -----       | -----      | 532        |      |
| Salmo_salar                 | ATTGTATCAG  | AGGGGAAGGT | ATA        | -----      | -----      | -----       | -----      | 801        |      |
| Didelphidae                 | -----       | -----      | -----      | -----      | -----      | -----       | -----      | 642        |      |
| Latimeria_chalumnae         | ATTTAGGGCA  | TGTAATCCT  | AGTCTACTCG | CCCTCTATCT | GCAAAGGCTA | TAAGAAACTT  | GGCATCAACA | 1712       |      |
| Monodelphis_domestica       | -----       | -----      | -----      | -----      | -----      | -----       | -----      | 543        |      |
| Macropus_eugenii            | -----       | -----      | -----      | -----      | -----      | -----       | -----      | 509        |      |
| Alligator_mississippiensis  | -----       | -----      | -----      | -----      | -----      | -----       | -----      | 566        |      |
| Chrysemys_picta_bellii      | CTCAAAGCCC  | CCCGCCACCA | GAACCCGAGT | TGCTTCTTCA | AAGAAGGCGA | ATGCTGTACT  | CTCTACAGCA | 2951       |      |
| Danio_rerio                 | -----       | -----      | -----      | -----      | -----      | -----       | -----      | 699        |      |
| Taeniopygia                 | -----       | -----      | -----      | -----      | -----      | -----       | -----      | 538        |      |
| Dasyus_novemcinctus         | -----       | -----      | -----      | -----      | -----      | -----       | -----      | 512        |      |
| LTR_XT                      | -----       | -----      | -----      | -----      | -----      | -----       | -----      | 503        |      |
| Haplorrhini                 | TCTATAACGA  | AGAAAGAAAA | AGGACCAGAA | GAAACGTCTT | TACTCAGATA | AGTACCGTAG  | AAAAGATAAA | 8083       |      |
| Catarrhini                  | TCTATG      | -----      | -----      | -----      | CTT        | CCCGC       | -----G     | AAAAGAGAAG | 7166 |
| Anolis_carolinensis         | -----       | -----      | -----      | -----      | -----      | -----       | -----      | 1184       |      |
| Murine_leukemia_virus       | GCTAAG      | -----      | -----      | -----      | CTAAGAGA   | AAGGCTAAC   | CAGAGACAAA | 7330       |      |
| Phascolarctos_cinereus      | AGGAGA      | -----      | -----      | -----      | CTCAAGGA   | AAGTTAGAT   | AAGAGGCAGT | 7150       |      |
| Estrildidae                 | -----       | -----      | -----      | -----      | -----      | -----       | -----      | 482        |      |
| Xenopus_Silurana_tropicalis | -----       | -----      | -----      | -----      | -----      | -----       | -----      | 812        |      |
| L_XT                        | -----       | -----      | -----      | -----      | -----      | -----       | -----      | 7509       |      |
| Takifugu_rubripes           | -----       | -----      | -----      | -----      | -----      | -----       | -----      | 707        |      |
| Bos_taurus                  | -----       | -----      | -----      | -----      | -----      | -----       | -----      | 533        |      |
| Homo_sapiens                | -----       | -----      | -----      | -----      | -----      | -----       | -----      | 450        |      |
| Microcebus_murinus          | -----       | -----      | -----      | -----      | -----      | -----       | -----      | 428        |      |
| Myotis_lucifugus            | -----       | -----      | -----      | -----      | -----      | -----       | -----      | 432        |      |
| Equus_caballus              | -----       | -----      | -----      | -----      | -----      | -----       | -----      | 450        |      |
| Tupaia_belangeri            | -----       | -----      | -----      | -----      | -----      | -----       | -----      | 498        |      |
| Loxodonta_africana          | -----       | -----      | -----      | -----      | -----      | -----       | -----      | 460        |      |
| Murinae                     | -----       | -----      | -----      | -----      | -----      | -----       | -----      | 489        |      |
| Canis_lupus_familiaris      | -----       | -----      | -----      | -----      | -----      | -----       | -----      | 536        |      |
| Sus_scrofa                  | -----       | -----      | -----      | -----      | -----      | -----       | -----      | 454        |      |
| Choloepus_hoffmanni         | -----       | -----      | -----      | -----      | -----      | -----       | -----      | 444        |      |
| Vicugna_pacos               | -----       | -----      | -----      | -----      | -----      | -----       | -----      | 474        |      |
| Gavialis_gangeticus         | -----       | -----      | -----      | -----      | -----      | -----       | -----      | 470        |      |
| Mammalia                    | AGAGGGCCGG  | TGGACNGCA  | GAGGCCTGGG | GTCNGGACGA | AGAGGCCGCN | GNGTGCGGGG  | ACTTCGNGAC | 836        |      |
| Passeroidea                 | -----       | -----      | -----      | -----      | -----      | -----       | -----      | 641        |      |
| Takifugu                    | -----       | -----      | -----      | -----      | -----      | -----       | -----      | 629        |      |
| Pteropus_vampyrus           | -----       | -----      | -----      | -----      | -----      | -----       | -----      | 472        |      |
| Ornithorhynchus             | CGCCGCTTAC  | GGAGGAGGT  | CTGTTGCGAC | CAATAGAGGC | TACCGAGCGA | GGTACTTCT   | GGTCCCGGCC | 2274       |      |
| Oryctolagus_cuniculus       | -----       | -----      | -----      | -----      | -----      | -----       | -----      | 494        |      |
| Gallus_gallus               | -----       | -----      | -----      | -----      | -----      | -----       | -----      | 508        |      |
| Hominidae                   | TAAAAAGGNA  | NGACNNNNNA | AGANGNNNNN | ANNNGGNGC  | ATANCCNNNT | NNCCCTNNCC  | GANTCCCAGG | 4451       |      |
| Metatheria                  | -----       | -----      | -----      | -----      | -----      | -----       | -----      | 569        |      |
| Rodentia                    | GCAACTGCC   | AGGCTCCCTG | ---CCTCCA  | AAGCCCAGGA | ACCTCCAGGT | CCCTGCTTCA  | AATGTGGTCA | 2056       |      |
| Monodelphis                 | -----       | -----      | -----      | -----      | -----      | -----       | -----      | 857        |      |
| Consensus                   | -----       | -----      | -----      | -----      | -----      | -----       | -----      |            |      |
| Conservation                | 100%        | -----      | -----      | -----      | -----      | -----       | -----      | 0%         |      |

|                             | 8,200      | 8,220       | 8,240      | 8,260      |            |            |            |       |
|-----------------------------|------------|-------------|------------|------------|------------|------------|------------|-------|
| Dipodomys_ordii             | -----      | -----       | -----      | -----      | 597        |            |            |       |
| Laurasiatheria              | -----      | -----       | -----      | -----      | 361        |            |            |       |
| Eutheria                    | -----      | -----       | -----      | -----      | 452        |            |            |       |
| Tarsius_syrichta            | -----      | -----       | -----      | -----      | 487        |            |            |       |
| Muridae                     | GCAGAACTGA | TTGATCTGAC  | CCAGGCTCTC | AGATGGGGAA | AAGGAAAGTC | CACCACCATA | TACACGGACA | 2578  |
| Gasterosteus_aculeatus      | TGGTTGTTGT | TTTANCCGTC  | CAACGNATC  | CNNAGANTGG | TGATAAGCGT | GTAGNTAGNN | CTNNTGTTTC | 2243  |
| Felis_silvestris            | -----      | -----       | -----      | -----      | 505        |            |            |       |
| Rattus                      | -----      | -----       | -----      | -----      | 589        |            |            |       |
| Papio_hamadryas             | AGGTTGACGG | AATCGCCACG  | TGGATTCACG | CATCCCACGC | CAAGGCTGCT | CCAGGGACGC | CTGGACCGAC | 5546  |
| Pan_troglodytes             | GGGCCAACGA | CACGCGTACC  | TAGA---ACC | CTTTCGCC   | CGGAGCAAAC | TCCTCAACAT | CGTTATGCAA | 3304  |
| Ailuropoda_melanoleuca      | -----      | -----       | -----      | -----      | 462        |            |            |       |
| Cavia_porcellus             | -----      | -----       | -----      | -----      | 527        |            |            |       |
| Ictidomys_tridecemlineatus  | -----      | -----       | -----      | -----      | 530        |            |            |       |
| Canis                       | -----      | -----       | -----      | -----      | 479        |            |            |       |
| Felis_catus                 | -----      | -----       | -----      | -----      | 423        |            |            |       |
| Ochotona_princeps           | -----      | -----       | -----      | -----      | 515        |            |            |       |
| Cercopithecidae             | GAACTTTCAG | GTTGGAGCTCC | CACGAACGCA | TGGCAATTGA | ATCTCCAGTG | GTCCCATTCG | AAAGGCCGCT | 1709  |
| Carnivora                   | -----      | -----       | -----      | -----      | 421        |            |            |       |
| Mus                         | TCAGCATTAG | ACAGGGCTTA  | CTCGCGGAAG | AATAAAAATA | AAGAGAATTC | TTGAGTTCAT | GCCAGTGGAT | 1751  |
| Mus_musculus                | -----      | -----       | -----      | -----      | 478        |            |            |       |
| Rattus_norvegicus           | -----      | -----       | -----      | -----      | 420        |            |            |       |
| Tursiops_truncatus          | -----      | -----       | -----      | -----      | 518        |            |            |       |
| Procavia_capensis           | -----      | -----       | -----      | -----      | 442        |            |            |       |
| Primates                    | -----      | -----       | -----      | -----      | 671        |            |            |       |
| Echinops_telfairi           | -----      | -----       | -----      | -----      | 473        |            |            |       |
| Sorex_araneus               | -----      | -----       | -----      | -----      | 494        |            |            |       |
| Canidae                     | -----      | -----       | -----      | -----      | 550        |            |            |       |
| Otolemur_garnettii          | -----      | -----       | -----      | -----      | 413        |            |            |       |
| Gallus                      | -----      | -----       | -----      | -----      | 633        |            |            |       |
| Callithrix_jacchus          | -----      | -----       | -----      | -----      | 495        |            |            |       |
| Crocodylus_porosus          | -----      | -----       | -----      | -----      | 527        |            |            |       |
| Erinaceus_europaeus         | -----      | -----       | -----      | -----      | 420        |            |            |       |
| rnd-6_family-7426-LTR-ERV1  | CATTGACGCC | AATGGTATNT  | TAAATGTNTC | CGCNGAGGAC | AAGACTACCG | GACAGAAGAA | CAAGATTACC | 1312  |
| Esox_lucius                 | -----      | -----       | -----      | -----      | 532        |            |            |       |
| Salmo_salar                 | -----      | -----       | -----      | -----      | 801        |            |            |       |
| Didelphidae                 | -----      | -----       | -----      | -----      | 642        |            |            |       |
| Latimeria_chalumnae         | GGCCAGGCC  | AAAGAATTCC  | TAACAGCACG | CTGGCGATT  | TTACTCTGTA | TCAA-----  | -----      | 1766  |
| Monodelphis_domestica       | -----      | -----       | -----      | -----      | 543        |            |            |       |
| Macropus_eugenii            | -----      | -----       | -----      | -----      | 509        |            |            |       |
| Alligator_mississippiensis  | -----      | -----       | -----      | -----      | 566        |            |            |       |
| Chrysemys_picta_belli       | GCATCCCGAA | ACCAGATTCT  | ATCGGACTAA | CGGCTTTTGG | ATTCTTTCAT | TGTTAAGTAG | TGGGTTAGTT | 3021  |
| Danio_rerio                 | -----      | -----       | -----      | -----      | 699        |            |            |       |
| Taeniopygia                 | -----      | -----       | -----      | -----      | 538        |            |            |       |
| Dasybus_novemcinctus        | -----      | -----       | -----      | -----      | 512        |            |            |       |
| LTR_XT                      | -----      | -----       | -----      | -----      | 503        |            |            |       |
| Haplorrhini                 | CACAAACATA | AAGAAGGACA  | TTGAGATAGG | TAGCTGGAAA | GATAATGAAT | GGCCTCCTGA | AAGAATTATC | 8153  |
| Catarrhini                  | CATAGCTATA | -----       | -----GG    | AAATTGGAAA | GATGATGAAT | GGCCCCCTGA | GAGAATCATA | 7218  |
| Anolis_carolinensis         | -----      | -----       | -----      | -----      | 1184       |            |            |       |
| Murine_leukemia_virus       | AATTGTTCGA | ATCAGGACAA  | G-----GG   | TGGTTTGAGG | GACTGTTTAA | CAGGTCCCCA | TGGTTACCGA | 7393  |
| Phascolarctos_cinereus      | TAGAGCACCA | AAAGAATTTA  | A-----GT   | TGGTACGAGG | GATGGTTCAA | CCGTTCCCCC | TGGCTTACTA | 7213  |
| Estrildidae                 | -----      | -----       | -----      | -----      | 482        |            |            |       |
| Xenopus_Silurana_tropicalis | -----      | -----       | -----      | -----      | 812        |            |            |       |
| L_XT                        | -----      | -----       | -----      | -----      | 7509       |            |            |       |
| Takifugu_rubripes           | -----      | -----       | -----      | -----      | 707        |            |            |       |
| Bos_taurus                  | -----      | -----       | -----      | -----      | 533        |            |            |       |
| Homo_sapiens                | -----      | -----       | -----      | -----      | 450        |            |            |       |
| Microcebus_murinus          | -----      | -----       | -----      | -----      | 428        |            |            |       |
| Myotis_lucifugus            | -----      | -----       | -----      | -----      | 432        |            |            |       |
| Equus_caballus              | -----      | -----       | -----      | -----      | 450        |            |            |       |
| Tupaia_belangeri            | -----      | -----       | -----      | -----      | 498        |            |            |       |
| Loxodonta_africana          | -----      | -----       | -----      | -----      | 460        |            |            |       |
| Murinae                     | -----      | -----       | -----      | -----      | 489        |            |            |       |
| Canis_lupus_familiaris      | -----      | -----       | -----      | -----      | 536        |            |            |       |
| Sus_scrofa                  | -----      | -----       | -----      | -----      | 454        |            |            |       |
| Choloepus_hoffmanni         | -----      | -----       | -----      | -----      | 444        |            |            |       |
| Vicugna_pacos               | -----      | -----       | -----      | -----      | 474        |            |            |       |
| Gavialis_gangeticus         | -----      | -----       | -----      | -----      | 470        |            |            |       |
| Mammalia                    | CAGAGGCAAA | TGGCCGGGAC  | CACGGAATCC | AGCGGTGGGT | GCCAGCACNA | NNCCCCAAA  | GGCCAGANGG | 906   |
| Passeroidea                 | -----      | -----       | -----      | -----      | 641        |            |            |       |
| Takifugu                    | -----      | -----       | -----      | -----      | 629        |            |            |       |
| Pteropus_vampyrus           | -----      | -----       | -----      | -----      | 472        |            |            |       |
| Ornithorhynchus             | CCCATCTCCC | TTGCTGTGTT  | TGTCATTGAC | ACAGTTCCCA | TTGGGCGGGC | CTTGGCGGGT | TCGTTACTGG | 2344  |
| Oryctolagus_cuniculus       | -----      | -----       | -----      | -----      | 494        |            |            |       |
| Gallus_gallus               | -----      | -----       | -----      | -----      | 508        |            |            |       |
| Hominidae                   | NTNANGCTNN | NNNTANCNG   | TNNGNNCANN | NCCNTNNTNN | TAGNCNCAAN | NNNNNNNTAN | NNNNNTNTNN | 4521  |
| Metatheria                  | -----      | -----       | -----      | -----      | 569        |            |            |       |
| Rodentia                    | GGAGGGTAC  | TGGGCCGGG   | CCTGTCNAA  | CCCTCGTAA  | CCACCTNGAC | CATGTCCAAG | GTGCCATCAA | 2126  |
| Monodelphis                 | -----      | -----       | -----      | -----      | 857        |            |            |       |
| Consensus                   | -----      | -----       | -----      | -----      | -----      | -----      | -----      | ----- |
| Conservation                | 100%       | -----       | -----      | -----      | -----      | -----      | -----      | ----- |
|                             | 0%         | -----       | -----      | -----      | -----      | -----      | -----      | ----- |

|                             | 8,280       | 8,300      | 8,320       |             |            |            |            |      |
|-----------------------------|-------------|------------|-------------|-------------|------------|------------|------------|------|
| Dipodomys_ordii             | -----       | -----      | -----       | 597         |            |            |            |      |
| Laurasiatheria              | -----       | -----      | -----       | 361         |            |            |            |      |
| Eutheria                    | -----       | -----      | -----       | 452         |            |            |            |      |
| Tarsius_syrichta            | -----       | -----      | -----       | 487         |            |            |            |      |
| Muridae                     | GTCGCTATGC  | TTTTACTACC | GGGCATGTCC  | ACGGTATGAT  | CTATAGAGAA | AGAGGGCTTC | TCACCGCTGG | 2648 |
| Gasterosteus_aculeatus      | AGACTNANNG  | GTTCTGTGTG | CAGATNCTNT  | TCCNNGTCAC  | CTCTCAGCCC | AGNCAGCAGA | ANTNNTCGCA | 2313 |
| Felis_silvestris            | -----       | -----      | -----       | 505         |            |            |            |      |
| Rattus                      | -----       | -----      | -----       | 589         |            |            |            |      |
| Papio_hamadryas             | GTCGTCCGGA  | ACTTGGAGAC | TCCGCCGCTC  | CGAGGACCCC  | CTTAAGATAA | GACTCTCACG | CACTTGACTT | 5616 |
| Pan_troglodytes             | TCTAATTGCC  | CGGCGAAAAA | GAGCCCTAAC  | CTGTGATGCT  | TTATGAACAA | ACCCCTGGCA | CATAGCCGGA | 3374 |
| Ailuropoda_melanoleuca      | -----       | -----      | -----       | 462         |            |            |            |      |
| Cavia_porcellus             | -----       | -----      | -----       | 527         |            |            |            |      |
| Ictidomys_tridecemlineatus  | -----       | -----      | -----       | 530         |            |            |            |      |
| Canis                       | -----       | -----      | -----       | 479         |            |            |            |      |
| Felis_catus                 | -----       | -----      | -----       | 423         |            |            |            |      |
| Ochotona_princeps           | -----       | -----      | -----       | 515         |            |            |            |      |
| Cercopithecidae             | TCTCATACAG  | TGCTGAGGAA | TCAC TACCCA | TCCGAGGTAG  | AGAAGTAATA | CAATACTGAA | CGTGGCTCTC | 1779 |
| Carnivora                   | -----       | -----      | -----       | 421         |            |            |            |      |
| Mus                         | TCTGCGGCAC  | AAAGCGTGAG | GAATCAATGG  | CAGGCAAAAG  | GCAAGGGTGA | GCAAGCTGAA | AATAGATAGA | 1821 |
| Mus_musculus                | -----       | -----      | -----       | 478         |            |            |            |      |
| Rattus_norvegicus           | -----       | -----      | -----       | 420         |            |            |            |      |
| Tursiops_truncatus          | -----       | -----      | -----       | 518         |            |            |            |      |
| Procavia_capensis           | -----       | -----      | -----       | 442         |            |            |            |      |
| Primates                    | -----       | -----      | -----       | 671         |            |            |            |      |
| Echinops_telfairi           | -----       | -----      | -----       | 473         |            |            |            |      |
| Sorex_araneus               | -----       | -----      | -----       | 494         |            |            |            |      |
| Canidae                     | -----       | -----      | -----       | 550         |            |            |            |      |
| Otolemur_garnettii          | -----       | -----      | -----       | 413         |            |            |            |      |
| Gallus                      | -----       | -----      | -----       | 633         |            |            |            |      |
| Callithrix_jacchus          | -----       | -----      | -----       | 495         |            |            |            |      |
| Crocodylus_porosus          | -----       | -----      | -----       | 527         |            |            |            |      |
| Erinaceus_europaeus         | -----       | -----      | -----       | 420         |            |            |            |      |
| rnd-6_family-7426-LTR-ERV1  | ATTACGAACG  | ACAAGGGTAG | GCTNTCGAAG  | GAAGAGATTG  | AGAGGATGGT | NCGGGAAGCT | GAGAAGTACA | 1382 |
| Esox_lucius                 | -----       | -----      | -----       | 532         |            |            |            |      |
| Salmo_salar                 | -----       | -----      | -----       | 801         |            |            |            |      |
| Didelphidae                 | -----       | -----      | -----       | 642         |            |            |            |      |
| Latimeria_chalumnae         | -----       | -----      | -----       | 1766        |            |            |            |      |
| Monodelphis_domestica       | -----       | -----      | -----       | 543         |            |            |            |      |
| Macropus_eugenii            | -----       | -----      | -----       | 509         |            |            |            |      |
| Alligator_mississippiensis  | -----       | -----      | -----       | 566         |            |            |            |      |
| Chrysemys_picta_bellii      | TTTTTCAGGCA | TTACCCACC  | TCAGATACCA  | AACCTTAGCCC | AATTGCTGCC | TTACCCACTG | TGGATATAAC | 3091 |
| Danio_rerio                 | -----       | -----      | -----       | 699         |            |            |            |      |
| Taeniopygia                 | -----       | -----      | -----       | 538         |            |            |            |      |
| Dasybus_novemcinctus        | -----       | -----      | -----       | 512         |            |            |            |      |
| LTR_XT                      | -----       | -----      | -----       | 503         |            |            |            |      |
| Haplorrhini                 | AAATACTATG  | GGCCAGCTAC | GTGGGCCCAA  | GATGGATCAT  | GGGGCTACCG | CACCCCTA   | TTTACATGTT | 8221 |
| Catarrhini                  | CAATATTATG  | GGCCTGCTAC | TTGGGCACAA  | GACGGCTCGT  | GGGGATACCG | GACCCCA    | TTTACATGAT | 7286 |
| Anolis_carolinensis         | -----       | -----      | -----       | 1184        |            |            |            |      |
| Murine_leukemia_virus       | CCCTGATATC  | CACCATTATG | GGCCCTCTGA  | TAGTACTTTT  | ATTAATCCTA | CTCCTCGGAC | CCTGCATTCT | 7463 |
| Phascolarctos_cinereus      | CTTTACTGTC  | TGCCCTTGCT | GGTCCCCTGC  | TACTCCTCCT  | TCTGTTACTC | ACCCCTGGGC | CTTGTGTCAT | 7283 |
| Estrildidae                 | -----       | -----      | -----       | 482         |            |            |            |      |
| Xenopus_Silurana_tropicalis | -----       | -----      | -----       | 812         |            |            |            |      |
| L_XT                        | -----       | -----      | -----       | 7509        |            |            |            |      |
| Takifugu_rubripes           | -----       | -----      | -----       | 707         |            |            |            |      |
| Bos_taurus                  | -----       | -----      | -----       | 533         |            |            |            |      |
| Homo_sapiens                | -----       | -----      | -----       | 450         |            |            |            |      |
| Microcebus_murinus          | -----       | -----      | -----       | 428         |            |            |            |      |
| Myotis_lucifugus            | -----       | -----      | -----       | 432         |            |            |            |      |
| Equus_caballus              | -----       | -----      | -----       | 450         |            |            |            |      |
| Tupaia_belangeri            | -----       | -----      | -----       | 498         |            |            |            |      |
| Loxodonta_africana          | -----       | -----      | -----       | 460         |            |            |            |      |
| Murinae                     | -----       | -----      | -----       | 489         |            |            |            |      |
| Canis_lupus_familiaris      | -----       | -----      | -----       | 536         |            |            |            |      |
| Sus_scrofa                  | -----       | -----      | -----       | 454         |            |            |            |      |
| Choloepus_hoffmanni         | -----       | -----      | -----       | 444         |            |            |            |      |
| Vicugna_pacos               | -----       | -----      | -----       | 474         |            |            |            |      |
| Gavialis_gangeticus         | -----       | -----      | -----       | 470         |            |            |            |      |
| Mammalia                    | GACCAGTCGC  | ACCTCAGCGG | NCACCAGTCC  | AGGGACCAGA  | CCAGACCAGC | CACTCCGCAG | CAGAGACCAG | 976  |
| Passeroidea                 | -----       | -----      | -----       | 641         |            |            |            |      |
| Takifugu                    | -----       | -----      | -----       | 629         |            |            |            |      |
| Pteropus_vampyrus           | -----       | -----      | -----       | 472         |            |            |            |      |
| Ornithorhynchus             | TTTGCCCTCG  | GCATCACCTG | CCGAGTACAG  | CTGTCCCATC  | TGCCGTGTTT | AATGCCCGCC | TCCGTCCCCG | 2414 |
| Oryctolagus_cuniculus       | -----       | -----      | -----       | 494         |            |            |            |      |
| Gallus_gallus               | -----       | -----      | -----       | 508         |            |            |            |      |
| Hominidae                   | NANCAATTTT  | NNNNNGCCCN | GC-CNNNCAG  | NNCCTCANTC  | NCNAGNTANA | NNNANNNNNN | GCNNTCNNTN | 4590 |
| Metatheria                  | -----       | -----      | -----       | 569         |            |            |            |      |
| Rodentia                    | GAGGGACATT  | GGGNTGTTGA | CTGCCCCCAT  | GTCCCTCAGC  | GCATGGGGAC | ATCAAGCCCA | GATCGCCCTC | 2196 |
| Monodelphis                 | -----       | -----      | -----       | 857         |            |            |            |      |
| Consensus                   | -----       | -----      | -----       | -----       |            |            |            |      |
| Conservation                | 100%        | -----      | -----       | -----       |            |            |            |      |
|                             | 0%          | -----      | -----       | -----       |            |            |            |      |

|                             | 8,340      | 8,360      | 8,380       | 8,400      |            |             |             |       |
|-----------------------------|------------|------------|-------------|------------|------------|-------------|-------------|-------|
| Dipodomys_ordii             | -----      | -----      | -----       | -----      | 597        |             |             |       |
| Laurasiatheria              | -----      | -----      | -----       | -----      | 361        |             |             |       |
| Eutheria                    | -----      | -----      | -----       | -----      | 452        |             |             |       |
| Tarsius_syrichta            | -----      | -----      | -----       | -----      | 487        |             |             |       |
| Muridae                     | GAAAAAGGAC | ATTAAAAACA | AAGAGAAATC  | TTGGCCCTCC | TAGAGGCTAT | TTGGCTTCCC  | CTACAAATTG  | 2718  |
| Gasterosteus_aculeatus      | CTGACAGAAG | CNTNTCAACT | NGCNAAGGGA  | AACGTAACCT | ACACTGATCT | AGCTGGGAGT  | CATGGGGCGT  | 2383  |
| Felis_silvestris            | -----      | -----      | -----       | -----      | 505        |             |             |       |
| Rattus                      | -----      | -----      | -----       | -----      | 589        |             |             |       |
| Papio_hamadryas             | CTTACTTGCC | CTTGTCCTCC | TACCCCGCGC  | CGTACATAGC | AGTAACCCTC | CATATAGTCC  | AAGATGGGAT  | 5686  |
| Pan_troglodytes             | ATTAGGCATG | CCTCCTCAGT | GAAGCAATTT  | ACTATTCATC | CAAAACCAGT | GGAAATAATAT | GCTATTGCAT  | 3444  |
| Ailuropoda_melanoleuca      | -----      | -----      | -----       | -----      | 462        |             |             |       |
| Cavia_porcellus             | -----      | -----      | -----       | -----      | 527        |             |             |       |
| Ictidomys_tridecemlineatus  | -----      | -----      | -----       | -----      | 530        |             |             |       |
| Canis                       | -----      | -----      | -----       | -----      | 479        |             |             |       |
| Felis_catus                 | -----      | -----      | -----       | -----      | 423        |             |             |       |
| Ochotona_princeps           | -----      | -----      | -----       | -----      | 515        |             |             |       |
| Cercopithecidae             | CTGCTCTGGC | CCCGGCTACC | TGATTTAGGG  | CCCTCAACCC | CTATTGTAC  | AAGCCTACAC  | TCAGGAGACG  | 1849  |
| Carnivora                   | -----      | -----      | -----       | -----      | 421        |             |             |       |
| Mus                         | AAGCATAGAA | AATCGAAATA | AGAAATTTCA  | TAAGTTGGAA | TAAACGTGT  | CTAAAGCGCG  | AAGCGGGAGC  | 1891  |
| Mus_musculus                | -----      | -----      | -----       | -----      | 478        |             |             |       |
| Rattus_norvegicus           | -----      | -----      | -----       | -----      | 420        |             |             |       |
| Tursiops_truncatus          | -----      | -----      | -----       | -----      | 518        |             |             |       |
| Procavia_capensis           | -----      | -----      | -----       | -----      | 442        |             |             |       |
| Primates                    | -----      | -----      | -----       | -----      | 671        |             |             |       |
| Echinops_telfairi           | -----      | -----      | -----       | -----      | 473        |             |             |       |
| Sorex_araneus               | -----      | -----      | -----       | -----      | 494        |             |             |       |
| Canidae                     | -----      | -----      | -----       | -----      | 550        |             |             |       |
| Otolemur_garnettii          | -----      | -----      | -----       | -----      | 413        |             |             |       |
| Gallus                      | -----      | -----      | -----       | -----      | 633        |             |             |       |
| Callithrix_jacchus          | -----      | -----      | -----       | -----      | 495        |             |             |       |
| Crocodylus_porosus          | -----      | -----      | -----       | -----      | 527        |             |             |       |
| Erinaceus_europaeus         | -----      | -----      | -----       | -----      | 420        |             |             |       |
| rnd-6_family-7426-LTR-ERV1  | AGTCCGAGGA | TGAAGAGCCC | AGAAGAAGG   | TNGAGGCNAA | GAACGCTTTG | GAGAAGTACG  | CGTACAACAT  | 1452  |
| Esox_lucius                 | -----      | -----      | -----       | -----      | 532        |             |             |       |
| Salmo_salar                 | -----      | -----      | -----       | -----      | 801        |             |             |       |
| Didelphidae                 | -----      | -----      | -----       | -----      | 642        |             |             |       |
| Latimeria_chalumnae         | -----      | -----      | -----       | -----      | 1766       |             |             |       |
| Monodelphis_domestica       | -----      | -----      | -----       | -----      | 543        |             |             |       |
| Macropus_eugenii            | -----      | -----      | -----       | -----      | 509        |             |             |       |
| Alligator_mississippiensis  | -----      | -----      | -----       | -----      | 566        |             |             |       |
| Chrysemys_picta_bellii      | CAACCGCTGG | AGGTCAAATT | TCATATGTTA  | AACGATGAAA | CTGAGAATGT | AAAGCTGGAC  | AATACTTGCA  | 3161  |
| Danio_rerio                 | -----      | -----      | -----       | -----      | 699        |             |             |       |
| Taeniopygia                 | -----      | -----      | -----       | -----      | 538        |             |             |       |
| Dasybus_novemcinctus        | -----      | -----      | -----       | -----      | 512        |             |             |       |
| LTR_XT                      | -----      | -----      | -----       | -----      | 503        |             |             |       |
| Haplorrhini                 | AAACCGAATT | ATAAGATTGC | AAGCAGTACT  | AGAAATCATA | GTCAATGAAA | CAGCTCGAGC  | CTTGGATCTG  | 8291  |
| Catarrhini                  | CAACCGAATC | ATACGGTTAC | AAGCTGTCTT  | AGAAATAATC | ACTAATAAAA | CCGGCAGAGC  | CTTGACTATT  | 7356  |
| Anolis_carolinensis         | -----      | -----      | -----       | -----      | 1184       |             |             |       |
| Murine_leukemia_virus       | CAACCGCTTG | GTCCAGTTTG | TAAAAG-ACA  | GAATTTCCGT | GGTGCAGGCC | CTGGTTCTGA  | CCCAACAGTA  | 7532  |
| Phascolarctos_cinereus      | CAATAAGTTA | GTGCAATTC  | TCAAATG-ATA | GGGTTAGTGC | AGTAAGGATT | CTGGTTCTCA  | GGCACAAGTA  | 7352  |
| Estrildidae                 | -----      | -----      | -----       | -----      | 482        |             |             |       |
| Xenopus_Silurana_tropicalis | -----      | -----      | -----       | -----      | 812        |             |             |       |
| L_XT                        | -----      | -----      | -----       | -----      | 7509       |             |             |       |
| Takifugu_rubripes           | -----      | -----      | -----       | -----      | 707        |             |             |       |
| Bos_taurus                  | -----      | -----      | -----       | -----      | 533        |             |             |       |
| Homo_sapiens                | -----      | -----      | -----       | -----      | 450        |             |             |       |
| Microcebus_murinus          | -----      | -----      | -----       | -----      | 428        |             |             |       |
| Myotis_lucifugus            | -----      | -----      | -----       | -----      | 432        |             |             |       |
| Equus_caballus              | -----      | -----      | -----       | -----      | 450        |             |             |       |
| Tupaia_belangeri            | -----      | -----      | -----       | -----      | 498        |             |             |       |
| Loxodonta_africana          | -----      | -----      | -----       | -----      | 460        |             |             |       |
| Murinae                     | -----      | -----      | -----       | -----      | 489        |             |             |       |
| Canis_lupus_familiaris      | -----      | -----      | -----       | -----      | 536        |             |             |       |
| Sus_scrofa                  | -----      | -----      | -----       | -----      | 454        |             |             |       |
| Choloepus_hoffmanni         | -----      | -----      | -----       | -----      | 444        |             |             |       |
| Vicugna_pacos               | -----      | -----      | -----       | -----      | 474        |             |             |       |
| Gavialis_gangeticus         | -----      | -----      | -----       | -----      | 470        |             |             |       |
| Mammalia                    | CGAGGATCCA | GAGGACACCG | CGTGGATCCG  | AGNCCCTTC  | CCCCNCCCN  | CCACGAGGTC  | ACGTAAGCCC  | 1046  |
| Passeroidea                 | -----      | -----      | -----       | -----      | 641        |             |             |       |
| Takifugu                    | -----      | -----      | -----       | -----      | 629        |             |             |       |
| Pteropus_vampyrus           | -----      | -----      | -----       | -----      | 472        |             |             |       |
| Ornithorhynchus             | TGGGGCCCTG | GGTTTACCC  | TTTTGAGGGC  | TCCAATTGAT | TTTACCCTTC | CCGAGCTGAG  | GGCTTCGCAT  | 2484  |
| Oryctolagus_cuniculus       | -----      | -----      | -----       | -----      | 494        |             |             |       |
| Gallus_gallus               | -----      | -----      | -----       | -----      | 508        |             |             |       |
| Hominidae                   | CANCNNNCNN | CANACAAGGA | GGNCTTNNNN  | GCCCGGGGCC | NCNTNNNCNN | CTNNNNNNNN  | NTCNNNNNANN | 4660  |
| Metatheria                  | -----      | -----      | -----       | -----      | 569        |             |             |       |
| Rodentia                    | CAGCTGACCT | CCTAGGTCTG | GCCATGGACG  | ACTGAGGGGG | CCCGGGCTCC | CTTGGCCTGA  | CCACTGCCAT  | 2266  |
| Monodelphis                 | -----      | -----      | -----       | -----      | 857        |             |             |       |
| Consensus                   | -----      | -----      | -----       | -----      | -----      | -----       | -----       | ----- |
| Conservation                | 100%       | -----      | -----       | -----      | -----      | -----       | -----       | ----- |
|                             | 0%         | -----      | -----       | -----      | -----      | -----       | -----       | ----- |

|                             | 8,420      | 8,440      | 8,460      |             |            |             |            |      |
|-----------------------------|------------|------------|------------|-------------|------------|-------------|------------|------|
| Dipodomys_ordii             | -----      | -----      | -----      | 597         |            |             |            |      |
| Laurasiatheria              | -----      | -----      | -----      | 361         |            |             |            |      |
| Eutheria                    | -----      | -----      | -----      | 452         |            |             |            |      |
| Tarsius_syrichta            | -----      | -----      | -----      | 487         |            |             |            |      |
| Muridae                     | CTGTCCTCCA | CTGCCGAGAT | GGGCCGCTGA | CCTGGCTGCC  | CGACAAACGG | CCCTAAGACC  | AGTGGGGCCT | 2788 |
| Gasterosteus_aculeatus      | GGAAGATTTT | TACGGG---- | -----      | -----       | -----      | -----       | -----      | 2399 |
| Felis_silvestris            | -----      | -----      | -----      | -----       | -----      | -----       | -----      | 505  |
| Rattus                      | -----      | -----      | -----      | -----       | -----      | -----       | -----      | 589  |
| Papio_hamadryas             | TCACAACAAA | GATAATCTTC | TTATACAACC | TAGTACTGGT  | CTACGCGGGG | TTTGACGACC  | CTCGCAAAGC | 5756 |
| Pan_troglodytes             | GTAATGTAAA | CTATGTGGAA | ATGGCATTAT | TAACATCTAA  | CCAATGGTGG | AGAGAGATCC  | GATCCTCAAA | 3514 |
| Ailuropoda_melanoleuca      | -----      | -----      | -----      | -----       | -----      | -----       | -----      | 462  |
| Cavia_porcellus             | -----      | -----      | -----      | -----       | -----      | -----       | -----      | 527  |
| Ictidomys_tridecemlineatus  | -----      | -----      | -----      | -----       | -----      | -----       | -----      | 530  |
| Canis                       | -----      | -----      | -----      | -----       | -----      | -----       | -----      | 479  |
| Felis_catus                 | -----      | -----      | -----      | -----       | -----      | -----       | -----      | 423  |
| Ochotona_princeps           | -----      | -----      | -----      | -----       | -----      | -----       | -----      | 515  |
| Cercopithecidae             | TGTACCCTCC | GGTGGAGGAC | CGTTCACCAC | CCACGCAATG  | GTCCTGGCAC | CAAACCCCCC  | CGCCTGCATA | 1919 |
| Carnivora                   | -----      | -----      | -----      | -----       | -----      | -----       | -----      | 421  |
| Mus                         | CTGGGTACTG | GGAGATTACG | ATAACCGATA | TGGAAAATAT  | TAGTTTATAG | ACACTTTCAG  | GTGGGTAAGC | 1961 |
| Mus_musculus                | -----      | -----      | -----      | -----       | -----      | -----       | -----      | 478  |
| Rattus_norvegicus           | -----      | -----      | -----      | -----       | -----      | -----       | -----      | 420  |
| Tursiops_truncatus          | -----      | -----      | -----      | -----       | -----      | -----       | -----      | 518  |
| Procavia_capensis           | -----      | -----      | -----      | -----       | -----      | -----       | -----      | 442  |
| Primates                    | -----      | -----      | -----      | -----       | -----      | -----       | -----      | 671  |
| Echinops_telfairi           | -----      | -----      | -----      | -----       | -----      | -----       | -----      | 473  |
| Sorex_araneus               | -----      | -----      | -----      | -----       | -----      | -----       | -----      | 494  |
| Canidae                     | -----      | -----      | -----      | -----       | -----      | -----       | -----      | 550  |
| Otolemur_garnettii          | -----      | -----      | -----      | -----       | -----      | -----       | -----      | 413  |
| Gallus                      | -----      | -----      | -----      | -----       | -----      | -----       | -----      | 633  |
| Callithrix_jacchus          | -----      | -----      | -----      | -----       | -----      | -----       | -----      | 495  |
| Crocodylus_porosus          | -----      | -----      | -----      | -----       | -----      | -----       | -----      | 527  |
| Erinaceus_europaeus         | -----      | -----      | -----      | -----       | -----      | -----       | -----      | 420  |
| rnd-6_family-7426-LTR-ERV1  | GAGGAACACA | ATNAAGGACG | AGAAGATTGC | ATCCAAACTG  | TCCGCTGATG | ANAAGGAGAA  | GATTGAGGAC | 1522 |
| Esox_lucius                 | -----      | -----      | -----      | -----       | -----      | -----       | -----      | 532  |
| Salmo_salar                 | -----      | -----      | -----      | -----       | -----      | -----       | -----      | 801  |
| Didelphidae                 | -----      | -----      | -----      | -----       | -----      | -----       | -----      | 642  |
| Latimeria_chalumnae         | -----      | -----      | -----      | -----       | -----      | -----       | -----      | 1766 |
| Monodelphis_domestica       | -----      | -----      | -----      | -----       | -----      | -----       | -----      | 543  |
| Macropus_eugenii            | -----      | -----      | -----      | -----       | -----      | -----       | -----      | 509  |
| Alligator_mississippiensis  | -----      | -----      | -----      | -----       | -----      | -----       | -----      | 566  |
| Chrysemys_picta_belli       | GTATCGTATT | TACACAATAT | GGTCTGCATT | TTAGCTGACT  | CCTTATCCGT | GCTCCCCGAG  | CGTAGAACAT | 3231 |
| Danio_rerio                 | -----      | -----      | -----      | -----       | -----      | -----       | -----      | 699  |
| Taeniopygia                 | -----      | -----      | -----      | -----       | -----      | -----       | -----      | 538  |
| Dasyopus_novemcinctus       | -----      | -----      | -----      | -----       | -----      | -----       | -----      | 512  |
| LTR_XT                      | -----      | -----      | -----      | -----       | -----      | -----       | -----      | 503  |
| Haplorrhini                 | TTAGCTATAC | AGGCCACTCA | AATGAGAGAT | GCTATATACC  | AAAATAGGCT | AGCATTAGAC  | TACCTCCTAG | 8361 |
| Catarrhini                  | CTGGCCCGGC | AAGAAACTCA | GATGAGAAAT | GCTATCTATC  | AAAATAGATT | GGCTCTCGAC  | TACTTGCTAG | 7426 |
| Anolis_carolinensis         | -----      | -----      | -----      | -----       | -----      | -----       | -----      | 1184 |
| Murine_leukemia_virus       | TCACCAACTC | AAATCAATAG | ATCCAGAAGA | AGTGGAAATCG | CGTGAATAAA | AGATTTTATT  | CAGTTTCCAG | 7602 |
| Phascolarctos_cinereus      | CCA--GACCC | TAGACAACGA | G----GATAA | CCTTTAATTC  | TGC---TCTA | TGATTAGACC  | TACCTCAAA  | 7413 |
| Estrildidae                 | -----      | -----      | -----      | -----       | -----      | -----       | -----      | 482  |
| Xenopus_Silurana_tropicalis | -----      | -----      | -----      | -----       | -----      | -----       | -----      | 812  |
| L_XT                        | -----      | -----      | -----      | -----       | -----      | -----       | -----      | 7509 |
| Takifugu_rubripes           | -----      | -----      | -----      | -----       | -----      | -----       | -----      | 707  |
| Bos_taurus                  | -----      | -----      | -----      | -----       | -----      | -----       | -----      | 533  |
| Homo_sapiens                | -----      | -----      | -----      | -----       | -----      | -----       | -----      | 450  |
| Microcebus_murinus          | -----      | -----      | -----      | -----       | -----      | -----       | -----      | 428  |
| Myotis_lucifugus            | -----      | -----      | -----      | -----       | -----      | -----       | -----      | 432  |
| Equus_caballus              | -----      | -----      | -----      | -----       | -----      | -----       | -----      | 450  |
| Tupaia_belangeri            | -----      | -----      | -----      | -----       | -----      | -----       | -----      | 498  |
| Loxodonta_africana          | -----      | -----      | -----      | -----       | -----      | -----       | -----      | 460  |
| Murinae                     | -----      | -----      | -----      | -----       | -----      | -----       | -----      | 489  |
| Canis_lupus_familiaris      | -----      | -----      | -----      | -----       | -----      | -----       | -----      | 536  |
| Sus_scrofa                  | -----      | -----      | -----      | -----       | -----      | -----       | -----      | 454  |
| Choloepus_hoffmanni         | -----      | -----      | -----      | -----       | -----      | -----       | -----      | 444  |
| Vicugna_pacos               | -----      | -----      | -----      | -----       | -----      | -----       | -----      | 474  |
| Gavialis_gangeticus         | -----      | -----      | -----      | -----       | -----      | -----       | -----      | 470  |
| Mammalia                    | CCCCCCCATA | CACCCAGACG | CCATCTTGGN | GAGGAGCAGG  | GGGAGGNGGA | GGAAATCTGA  | AAGACTGAGC | 1116 |
| Passeroidea                 | -----      | -----      | -----      | -----       | -----      | -----       | -----      | 641  |
| Takifugu                    | -----      | -----      | -----      | -----       | -----      | -----       | -----      | 629  |
| Pteropus_vampyrus           | -----      | -----      | -----      | -----       | -----      | -----       | -----      | 472  |
| Ornithorhynchus             | GCCACGGGTG | ATGAGGCTTC | CCGCAAGGAC | ACTGCCTGGT  | TGTGTGTCTT | CTAACCTTTC  | TGCTTGCTTC | 2554 |
| Oryctolagus_cuniculus       | -----      | -----      | -----      | -----       | -----      | -----       | -----      | 494  |
| Gallus_gallus               | -----      | -----      | -----      | -----       | -----      | -----       | -----      | 508  |
| Hominidae                   | NNNNNNCTNN | CANCNNNNNN | TNNNNNNCNT | NCNNNNNGCAN | ANNCATNNNC | GN TANCTTCT | TACTNTNGTA | 4730 |
| Metatheria                  | -----      | -----      | -----      | -----       | -----      | -----       | -----      | 569  |
| Rodentia                    | CTCCGACAGG | GAGCCTTGGG | TAGTCATCAC | GGTATCAGGG  | CGATCCATCT | CCTTCCTTCT  | GGACACCGGG | 2336 |
| Monodelphis                 | -----      | -----      | -----      | -----       | -----      | -----       | -----      | 857  |
| Consensus                   | -----      | -----      | -----      | -----       | -----      | -----       | -----      |      |
| Conservation                | 100%       | -----      | -----      | -----       | -----      | -----       | -----      | 0%   |

|                             | 8,480      | 8,500      | 8,520      | 8,540      |             |            |            |       |
|-----------------------------|------------|------------|------------|------------|-------------|------------|------------|-------|
| Dipodomys_ordii             | -----      | -----      | -----      | -----      | 597         |            |            |       |
| Laurasiatheria              | -----      | -----      | -----      | -----      | 361         |            |            |       |
| Eutheria                    | -----      | -----      | -----      | -----      | 452         |            |            |       |
| Tarsius_syrichta            | -----      | -----      | -----      | -----      | 487         |            |            |       |
| Muridae                     | ATTGATATTC | TGATGACATA | CCCCGACCCG | GTGCTGCCTG | AGACTCCATG  | GTAAAGAAGA | AATGGACAGC | 2858  |
| Gasterosteus_aculeatus      | -----      | -----      | -----      | -----      | 2399        |            |            |       |
| Felis_silvestris            | -----      | -----      | -----      | -----      | 505         |            |            |       |
| Rattus                      | -----      | -----      | -----      | -----      | 589         |            |            |       |
| Papio_hamadryas             | CATAGAACTA | GTACAAAAGC | GATATGGCCG | ACCATGCGAT | TGCAGCGGAG  | GACAAGTGTC | CGAGCCCCCG | 5826  |
| Pan_troglodytes             | GAGAGCCTCA | AACTGAGACC | TGGACGGACC | ATACGGCGAC | TCC - CCAAT | GCTAGCAGTA | CCATCTGGGG | 3582  |
| Ailuropoda_melanoleuca      | -----      | -----      | -----      | -----      | 462         |            |            |       |
| Cavia_porcellus             | -----      | -----      | -----      | -----      | 527         |            |            |       |
| Ictidomys_tridecemlineatus  | -----      | -----      | -----      | -----      | 530         |            |            |       |
| Canis                       | -----      | -----      | -----      | -----      | 479         |            |            |       |
| Felis_catus                 | -----      | -----      | -----      | -----      | 423         |            |            |       |
| Ochotona_princeps           | -----      | -----      | -----      | -----      | 515         |            |            |       |
| Cercopithecidae             | CTCCCTAGGC | CAAGGTTGAC | ACCAAAGATG | AGTGCCAGGA | TTAGATTGTT  | GTATCAGCCT | TTTACAGAAA | 1989  |
| Carnivora                   | -----      | -----      | -----      | -----      | 421         |            |            |       |
| Mus                         | TTCCACCAGG | AACCAGTGTC | AAGAAGATTG | AAGAATCTCC | TTGGGATCCA  | GTATGTGAA  | AGCCTGCTTG | 2031  |
| Mus_musculus                | -----      | -----      | -----      | -----      | 478         |            |            |       |
| Rattus_norvegicus           | -----      | -----      | -----      | -----      | 420         |            |            |       |
| Tursiops_truncatus          | -----      | -----      | -----      | -----      | 518         |            |            |       |
| Procavia_capensis           | -----      | -----      | -----      | -----      | 442         |            |            |       |
| Primates                    | -----      | -----      | -----      | -----      | 671         |            |            |       |
| Echinops_telfairi           | -----      | -----      | -----      | -----      | 473         |            |            |       |
| Sorex_araneus               | -----      | -----      | -----      | -----      | 494         |            |            |       |
| Canidae                     | -----      | -----      | -----      | -----      | 550         |            |            |       |
| Otolemur_garnettii          | -----      | -----      | -----      | -----      | 413         |            |            |       |
| Gallus                      | -----      | -----      | -----      | -----      | 633         |            |            |       |
| Callithrix_jacchus          | -----      | -----      | -----      | -----      | 495         |            |            |       |
| Crocodylus_porosus          | -----      | -----      | -----      | -----      | 527         |            |            |       |
| Erinaceus_europaeus         | -----      | -----      | -----      | -----      | 420         |            |            |       |
| rnd-6_family-7426-LTR-ERV1  | GCTATTGANG | AAGCTATCGA | GTGGCTNGAC | GGNAACCAAC | TCGCCGAGGC  | TGATGAGTTT | GAAGACAAGN | 1592  |
| Esox_lucius                 | -----      | -----      | -----      | -----      | 532         |            |            |       |
| Salmo_salar                 | -----      | -----      | -----      | -----      | 801         |            |            |       |
| Didelphidae                 | -----      | -----      | -----      | -----      | 642         |            |            |       |
| Latimeria_chalumnae         | -----      | -----      | -----      | -----      | 1766        |            |            |       |
| Monodelphis_domestica       | -----      | -----      | -----      | -----      | 543         |            |            |       |
| Macropus_eugenii            | -----      | -----      | -----      | -----      | 509         |            |            |       |
| Alligator_mississippiensis  | -----      | -----      | -----      | -----      | 566         |            |            |       |
| Chrysemys_picta_bellii      | TTTGGAAGC  | TAAGTCCTTG | GGTACTGTTA | GCTCCCTCTC | GGTCTCCAG   | CCCCGAGTTT | ACCACCATAA | 3301  |
| Danio_rerio                 | -----      | -----      | -----      | -----      | 699         |            |            |       |
| Taeniopygia                 | -----      | -----      | -----      | -----      | 538         |            |            |       |
| Dasybus_novemcinctus        | -----      | -----      | -----      | -----      | 512         |            |            |       |
| LTR_XT                      | -----      | -----      | -----      | -----      | 503         |            |            |       |
| Haplorrhini                 | CCTCAGAAGG | AGGAGTTTGT | GGCAAGCTTA | ATTTGACCAA | CTGTTGCTTA  | CAAATCGATG | ATAATGGAAG | 8431  |
| Catarrhini                  | CAGCTGAAGG | AGGGTCTGCG | GGGAAATTTA | ACCTTACTAA | TTGCTGTCTA  | CACATAGATG | ATCAAGGGCA | 7496  |
| Anolis_carolinensis         | -----      | -----      | -----      | -----      | 1184        |            |            |       |
| Murine_leukemia_virus       | AAAGAGGGGG | GAA -      | -----      | -----      | 7615        |            |            |       |
| Phascolarctos_cinereus      | GGAAATGGGG | GAA -      | -----      | -----      | 7426        |            |            |       |
| Estrildidae                 | -----      | -----      | -----      | -----      | 482         |            |            |       |
| Xenopus_Silurana_tropicalis | -----      | -----      | -----      | -----      | 812         |            |            |       |
| L_XT                        | -----      | -----      | -----      | -----      | 7509        |            |            |       |
| Takifugu_rubripes           | -----      | -----      | -----      | -----      | 707         |            |            |       |
| Bos_taurus                  | -----      | -----      | -----      | -----      | 533         |            |            |       |
| Homo_sapiens                | -----      | -----      | -----      | -----      | 450         |            |            |       |
| Microcebus_murinus          | -----      | -----      | -----      | -----      | 428         |            |            |       |
| Myotis_lucifugus            | -----      | -----      | -----      | -----      | 432         |            |            |       |
| Equus_caballus              | -----      | -----      | -----      | -----      | 450         |            |            |       |
| Tupaia_belangeri            | -----      | -----      | -----      | -----      | 498         |            |            |       |
| Loxodonta_africana          | -----      | -----      | -----      | -----      | 460         |            |            |       |
| Murinae                     | -----      | -----      | -----      | -----      | 489         |            |            |       |
| Canis_lupus_familiaris      | -----      | -----      | -----      | -----      | 536         |            |            |       |
| Sus_scrofa                  | -----      | -----      | -----      | -----      | 454         |            |            |       |
| Choloepus_hoffmanni         | -----      | -----      | -----      | -----      | 444         |            |            |       |
| Vicugna_pacos               | -----      | -----      | -----      | -----      | 474         |            |            |       |
| Gavialis_gangeticus         | -----      | -----      | -----      | -----      | 470         |            |            |       |
| Mammalia                    | ATTTACCCGA | AAGAGACTGA | GTNATCCAAA | AGAGACTATT | TAAACNGAAG  | AGACTGTAGN | TANTNCTTAA | 1186  |
| Passeroidea                 | -----      | -----      | -----      | -----      | 641         |            |            |       |
| Takifugu                    | -----      | -----      | -----      | -----      | 629         |            |            |       |
| Pteropus_vampyrus           | -----      | -----      | -----      | -----      | 472         |            |            |       |
| Ornithorhynchus             | CGCTCGGCTG | GATCATTCCA | GTAAGCACT  | GTTGTGGCT  | CCTGGGGCCC  | GGAGGACCTG | CGCGTCCCTC | 2624  |
| Oryctolagus_cuniculus       | -----      | -----      | -----      | -----      | 494         |            |            |       |
| Gallus_gallus               | -----      | -----      | -----      | -----      | 508         |            |            |       |
| Hominidae                   | NANACNTTCN | CAGGNTNGAT | TNANGCCTNN | ---CCNACNN | CNCNTNANAC  | AGNAGANGTN | GNAGNNTCNN | 4797  |
| Metatheria                  | -----      | -----      | -----      | -----      | 569         |            |            |       |
| Rodentia                    | GCCACCTACT | CAGTCCTGAC | GGAGTTTTGG | GGACCCACCT | CTCCTTGTTT  | CCCTATTGTC | GGGGTAGGGG | 2406  |
| Monodelphis                 | -----      | -----      | -----      | -----      | 857         |            |            |       |
| Consensus                   | -----      | -----      | -----      | -----      | -----       | -----      | -----      | ----- |
| Conservation                |            |            |            |            |             |            |            | ----- |

|                             | 8,560      | 8,580      | 8,600      |            |            |            |            |       |
|-----------------------------|------------|------------|------------|------------|------------|------------|------------|-------|
| Dipodomys_ordii             | -----      | -----      | -----      | 597        |            |            |            |       |
| Laurasiatheria              | -----      | -----      | -----      | 361        |            |            |            |       |
| Eutheria                    | -----      | -----      | -----      | 452        |            |            |            |       |
| Tarsius_syrichta            | -----      | -----      | -----      | 487        |            |            |            |       |
| Muridae                     | TCAAACCCAC | AGGTTGATGG | AGGACACCAG | AGGGAAGAT  | CATTCTCCA  | GAACAACCTG | GCAGGACTCT | 2928  |
| Gasterosteus_aculeatus      | -----      | -----      | -----      | 2399       |            |            |            |       |
| Felis_silvestris            | -----      | -----      | -----      | 505        |            |            |            |       |
| Rattus                      | -----      | -----      | -----      | 589        |            |            |            |       |
| Papio_hamadryas             | TCAGACAGGG | TCAGTCAAGT | GACTTGCTCA | GGCAAGACAG | CTTACTTAAT | GCCCGACCAA | AGATGGAAAT | 5896  |
| Pan_troglodytes             | TCGGTAGGCC | CCGGTCATGA | TATCCAAGAA | CCCCGACAAA | GTCCTTTTTC | CGGTTAATTA | AAAAGATTCC | 3652  |
| Ailuropoda_melanoleuca      | -----      | -----      | -----      | 462        |            |            |            |       |
| Cavia_porcellus             | -----      | -----      | -----      | 527        |            |            |            |       |
| Ictidomys_tridecemlineatus  | -----      | -----      | -----      | 530        |            |            |            |       |
| Canis                       | -----      | -----      | -----      | 479        |            |            |            |       |
| Felis_catus                 | -----      | -----      | -----      | 423        |            |            |            |       |
| Ochotona_princeps           | -----      | -----      | -----      | 515        |            |            |            |       |
| Cercopithecidae             | GTGTTGCCTC | CCAACCTCGA | ATCCACAAA  | ACCCCGGAA  | CGCTCACTGC | CCCAAACCCC | CCGGAATCCC | 2059  |
| Carnivora                   | -----      | -----      | -----      | 421        |            |            |            |       |
| Mus                         | TCCAGGTAA  | GTCAGGATTG | CCACATGGGG | AAATTGGAAT | TAATTGTGCT | AACCCAGAG  | TCAGAGGTAG | 2101  |
| Mus_musculus                | -----      | -----      | -----      | 478        |            |            |            |       |
| Rattus_norvegicus           | -----      | -----      | -----      | 420        |            |            |            |       |
| Tursiops_truncatus          | -----      | -----      | -----      | 518        |            |            |            |       |
| Procavia_capensis           | -----      | -----      | -----      | 442        |            |            |            |       |
| Primates                    | -----      | -----      | -----      | 671        |            |            |            |       |
| Echinops_telfairi           | -----      | -----      | -----      | 473        |            |            |            |       |
| Sorex_araneus               | -----      | -----      | -----      | 494        |            |            |            |       |
| Canidae                     | -----      | -----      | -----      | 550        |            |            |            |       |
| Otolemur_garnettii          | -----      | -----      | -----      | 413        |            |            |            |       |
| Gallus                      | -----      | -----      | -----      | 633        |            |            |            |       |
| Callithrix_jacchus          | -----      | -----      | -----      | 495        |            |            |            |       |
| Crocodylus_porosus          | -----      | -----      | -----      | 527        |            |            |            |       |
| Erinaceus_europaeus         | -----      | -----      | -----      | 420        |            |            |            |       |
| rnd-6_family-7426-LTR-ERV1  | TGAAGGAGCT | NGAGGGNGTN | TGCAATCCGA | TCATCGCGAA | GATGTATCAA | GGTGGCGCTG | GTGGTGGTCT | 1662  |
| Esox_lucius                 | -----      | -----      | -----      | 532        |            |            |            |       |
| Salmo_salar                 | -----      | -----      | -----      | 801        |            |            |            |       |
| Didelphidae                 | -----      | -----      | -----      | 642        |            |            |            |       |
| Latimeria_chalumnae         | -----      | -----      | -----      | 1766       |            |            |            |       |
| Monodelphis_domestica       | -----      | -----      | -----      | 543        |            |            |            |       |
| Macropus_eugenii            | -----      | -----      | -----      | 509        |            |            |            |       |
| Alligator_mississippiensis  | -----      | -----      | -----      | 566        |            |            |            |       |
| Chrysemys_picta_bellii      | AGGAAAGGTT | TGGAGATCCC | CATTGACACA | TAAAGCTACA | CCTGGCCAAG | AAAGTAGTGG | CCGACGCAGG | 3371  |
| Danio_rerio                 | -----      | -----      | -----      | 699        |            |            |            |       |
| Taeniopygia                 | -----      | -----      | -----      | 538        |            |            |            |       |
| Dasybus_novemcinctus        | -----      | -----      | -----      | 512        |            |            |            |       |
| LTR_XT                      | -----      | -----      | -----      | 503        |            |            |            |       |
| Haplorrhini                 | AGCTGTTATG | GAAATTAAGT | CTAGAATGCG | GAAGTTAGCC | CATGTCCCAG | TCCAGACTTG | GTCNNGGTGG | 8501  |
| Catarrhini                  | AGTAGTTGAA | GACATAGTTA | GAGATATGAC | AAAAGTGGCA | CACGTGCCCG | TGCAAGTGTG | GCATGGATTT | 7566  |
| Anolis_carolinensis         | -----      | -----      | -----      | 1184       |            |            |            |       |
| Murine_leukemia_virus       | -----      | -----      | -----      | 7615       |            |            |            |       |
| Phascolarctos_cinereus      | -----      | -----      | -----      | 7426       |            |            |            |       |
| Estrildidae                 | -----      | -----      | -----      | 482        |            |            |            |       |
| Xenopus_Silurana_tropicalis | -----      | -----      | -----      | 812        |            |            |            |       |
| L_XT                        | -----      | -----      | -----      | 7509       |            |            |            |       |
| Takifugu_rubripes           | -----      | -----      | -----      | 707        |            |            |            |       |
| Bos_taurus                  | -----      | -----      | -----      | 533        |            |            |            |       |
| Homo_sapiens                | -----      | -----      | -----      | 450        |            |            |            |       |
| Microcebus_murinus          | -----      | -----      | -----      | 428        |            |            |            |       |
| Myotis_lucifugus            | -----      | -----      | -----      | 432        |            |            |            |       |
| Equus_caballus              | -----      | -----      | -----      | 450        |            |            |            |       |
| Tupaia_belangeri            | -----      | -----      | -----      | 498        |            |            |            |       |
| Loxodonta_africana          | -----      | -----      | -----      | 460        |            |            |            |       |
| Murinae                     | -----      | -----      | -----      | 489        |            |            |            |       |
| Canis_lupus_familiaris      | -----      | -----      | -----      | 536        |            |            |            |       |
| Sus_scrofa                  | -----      | -----      | -----      | 454        |            |            |            |       |
| Choloepus_hoffmanni         | -----      | -----      | -----      | 444        |            |            |            |       |
| Vicugna_pacos               | -----      | -----      | -----      | 474        |            |            |            |       |
| Gavialis_gangeticus         | -----      | -----      | -----      | 470        |            |            |            |       |
| Mammalia                    | TTGGCAAGTT | TTAAAATTTN | NCCCTCNTN  | TCCCNCTAC  | CCAGCNGGT  | GGGGGCTCGT | GAGGAAGATT | 1256  |
| Passeroidea                 | -----      | -----      | -----      | 641        |            |            |            |       |
| Takifugu                    | -----      | -----      | -----      | 629        |            |            |            |       |
| Pteropus_vampyrus           | -----      | -----      | -----      | 472        |            |            |            |       |
| Ornithorhynchus             | CCACCAGCTG | CGGTTGCTGC | CGAGGCCGGT | CACTTACCTC | ATCCCCTTGT | GGTGCCTCCT | CTGTGGTAAT | 2694  |
| Oryctolagus_cuniculus       | -----      | -----      | -----      | 494        |            |            |            |       |
| Gallus_gallus               | -----      | -----      | -----      | 508        |            |            |            |       |
| Hominiidae                  | NCCTNNTNGA | ACANATNATC | CCNNGNTTTG | GACTTCCCGG | ATCCCTGCAA | TCAGACAACG | GCCNCGCNTT | 4867  |
| Metatheria                  | -----      | -----      | -----      | 569        |            |            |            |       |
| Rodentia                    | GACAGCCTTA | CCAGCCTCAC | CAAACCCAC  | CACTTAGCTG | TATCCCCTT  | ACCCACTCCT | TCCTAGTGGT | 2476  |
| Monodelphis                 | -----      | -----      | -----      | 857        |            |            |            |       |
| Consensus                   | -----      | -----      | -----      | -----      |            |            |            |       |
| Conservation                | 100%       | -----      | -----      | -----      | -----      | -----      | -----      | ----- |
|                             | 0%         | -----      | -----      | -----      | -----      | -----      | -----      | ----- |

|                             | 8,620              | 8,640              | 8,660              | 8,680              |                    |                     |                    |      |
|-----------------------------|--------------------|--------------------|--------------------|--------------------|--------------------|---------------------|--------------------|------|
| Dipodomys_ordii             | -----              | -----              | -----              | -----              | 597                |                     |                    |      |
| Laurasiatheria              | -----              | -----              | -----              | -----              | 361                |                     |                    |      |
| Eutheria                    | -----              | -----              | -----              | -----              | 452                |                     |                    |      |
| Tarsius_syrichta            | -----              | -----              | -----              | -----              | 487                |                     |                    |      |
| Muridae                     | GGTAAGT <b>GAC</b> | CTTCACC <b>GAG</b> | CTACTCATCT         | GGGGTCCACA         | AAACTTTCTG         | AGTTGCTCAG          | ACCAAGGTAT         | 2998 |
| Gasterosteus_aculeatus      | -----              | -----              | -----              | -----              | 2399               |                     |                    |      |
| Felis_silvestris            | -----              | -----              | -----              | -----              | 505                |                     |                    |      |
| Rattus                      | -----              | -----              | -----              | -----              | 589                |                     |                    |      |
| Papio_hamadryas             | GTAAGT <b>CAAT</b> | TCCAAA <b>AGAC</b> | ACCTCC <b>CCAA</b> | GCGGG <b>CCACT</b> | CCAAG <b>AGTGC</b> | CCCTG <b>TAATT</b>  | CTTACC <b>AGTC</b> | 5966 |
| Pan_troglodytes             | ACCGGT <b>GCAC</b> | TC----- <b>GT</b>  | CCCTG <b>CCCCT</b> | GCTGG <b>GGACA</b> | CCAC <b>CTCCA</b>  | AACC <b>ACAAAAC</b> | CTCT <b>GCCCAT</b> | 3716 |
| Ailuropoda_melanoleuca      | -----              | -----              | -----              | -----              | 462                |                     |                    |      |
| Cavia_porcellus             | -----              | -----              | -----              | -----              | 527                |                     |                    |      |
| Ictidomys_tridecemlineatus  | -----              | -----              | -----              | -----              | 530                |                     |                    |      |
| Canis                       | -----              | -----              | -----              | -----              | 479                |                     |                    |      |
| Felis_catus                 | -----              | -----              | -----              | -----              | 423                |                     |                    |      |
| Ochotona_princeps           | -----              | -----              | -----              | -----              | 515                |                     |                    |      |
| Cercopithecidae             | CAACT <b>CCCCC</b> | TCTC <b>TCCCC</b>  | CGCG <b>TCTGT</b>  | TGGGG <b>GGCCT</b> | ACACA <b>ATCAT</b> | CTGAT <b>ATCTC</b>  | CTATA <b>CTCTC</b> | 2129 |
| Carnivora                   | -----              | -----              | -----              | -----              | 421                |                     |                    |      |
| Mus                         | AGAT <b>GAAAGA</b> | CCTAA <b>AGAAC</b> | CTACA <b>AATGC</b> | TTGAC <b>CGGGA</b> | GATG <b>GCCTCT</b> | CCTG <b>TTTGGC</b>  | AAAC <b>CCGGTT</b> | 2171 |
| Mus_musculus                | -----              | -----              | -----              | -----              | 478                |                     |                    |      |
| Rattus_norvegicus           | -----              | -----              | -----              | -----              | 420                |                     |                    |      |
| Tursiops_truncatus          | -----              | -----              | -----              | -----              | 518                |                     |                    |      |
| Procavia_capensis           | -----              | -----              | -----              | -----              | 442                |                     |                    |      |
| Primates                    | -----              | -----              | -----              | -----              | 671                |                     |                    |      |
| Echinops_telfairi           | -----              | -----              | -----              | -----              | 473                |                     |                    |      |
| Sorex_araneus               | -----              | -----              | -----              | -----              | 494                |                     |                    |      |
| Canidae                     | -----              | -----              | -----              | -----              | 550                |                     |                    |      |
| Otolemur_garnettii          | -----              | -----              | -----              | -----              | 413                |                     |                    |      |
| Gallus                      | -----              | -----              | -----              | -----              | 633                |                     |                    |      |
| Callithrix_jacchus          | -----              | -----              | -----              | -----              | 495                |                     |                    |      |
| Crocodylus_porosus          | -----              | -----              | -----              | -----              | 527                |                     |                    |      |
| Erinaceus_europaeus         | -----              | -----              | -----              | -----              | 420                |                     |                    |      |
| rnd-6_family-7426-LTR-ERV1  | ATGG <b>ANGAAG</b> | AAG <b>TCCTGC</b>  | TCCT <b>AGTGGT</b> | -----              | -----              | -----               | -----              | 1692 |
| Esox_lucius                 | -----              | -----              | -----              | -----              | -----              | -----               | -----              | 532  |
| Salmo_salar                 | -----              | -----              | -----              | -----              | -----              | -----               | -----              | 801  |
| Didelphidae                 | -----              | -----              | -----              | -----              | -----              | -----               | -----              | 642  |
| Latimeria_chalumnae         | -----              | -----              | -----              | -----              | -----              | -----               | -----              | 1766 |
| Monodelphis_domestica       | -----              | -----              | -----              | -----              | -----              | -----               | -----              | 543  |
| Macropus_eugenii            | -----              | -----              | -----              | -----              | -----              | -----               | -----              | 509  |
| Alligator_mississippiensis  | -----              | -----              | -----              | -----              | -----              | -----               | -----              | 566  |
| Chrysemys_picta_bellii      | CTAT <b>GTTGCC</b> | GGGG <b>TGTGC</b>  | CTAT <b>TGAAAG</b> | AAT <b>GTGTTT</b>  | TCC <b>GACAGAT</b> | TAA <b>ACCCAC</b>   | AC <b>CCCCAGAA</b> | 3441 |
| Danio_rerio                 | -----              | -----              | -----              | -----              | -----              | -----               | -----              | 699  |
| Taeniopygia                 | -----              | -----              | -----              | -----              | -----              | -----               | -----              | 538  |
| Dasybus_novemcinctus        | -----              | -----              | -----              | -----              | -----              | -----               | -----              | 512  |
| LTR_XT                      | -----              | -----              | -----              | -----              | -----              | -----               | -----              | 503  |
| Haplorrhini                 | AGCC <b>AAACT</b>  | CAC <b>TTTTTGG</b> | AGG <b>ATGGTTC</b> | TCAT <b>GGTTTG</b> | GAG <b>GCITTA</b>  | AA <b>CTTTGATA</b>  | ATT <b>GGTTTTA</b> | 8571 |
| Catarrhini                  | GAT <b>CCTGGGG</b> | CCAT <b>GTTTGG</b> | AAA <b>ATGGTTC</b> | CCAG <b>CGCTAG</b> | GAG <b>GATTTAA</b> | AA <b>CTTTATA</b>   | ATAG <b>GAGTTA</b> | 7636 |
| Anolis_carolinensis         | -----              | -----              | -----              | -----              | -----              | -----               | -----              | 1184 |
| Murine_leukemia_virus       | -----              | -----              | -----              | -----              | -----              | -----               | -----              | 7615 |
| Phascolarctos_cinereus      | -----              | -----              | -----              | -----              | -----              | -----               | -----              | 7426 |
| Estrildidae                 | -----              | -----              | -----              | -----              | -----              | -----               | -----              | 482  |
| Xenopus_Silurana_tropicalis | -----              | -----              | -----              | -----              | -----              | -----               | -----              | 812  |
| L_XT                        | -----              | -----              | -----              | -----              | -----              | -----               | -----              | 7509 |
| Takifugu_rubripes           | -----              | -----              | -----              | -----              | -----              | -----               | -----              | 707  |
| Bos_taurus                  | -----              | -----              | -----              | -----              | -----              | -----               | -----              | 533  |
| Homo_sapiens                | -----              | -----              | -----              | -----              | -----              | -----               | -----              | 450  |
| Microcebus_murinus          | -----              | -----              | -----              | -----              | -----              | -----               | -----              | 428  |
| Myotis_lucifugus            | -----              | -----              | -----              | -----              | -----              | -----               | -----              | 432  |
| Equus_caballus              | -----              | -----              | -----              | -----              | -----              | -----               | -----              | 450  |
| Tupaia_belangeri            | -----              | -----              | -----              | -----              | -----              | -----               | -----              | 498  |
| Loxodonta_africana          | -----              | -----              | -----              | -----              | -----              | -----               | -----              | 460  |
| Murinae                     | -----              | -----              | -----              | -----              | -----              | -----               | -----              | 489  |
| Canis_lupus_familiaris      | -----              | -----              | -----              | -----              | -----              | -----               | -----              | 536  |
| Sus_scrofa                  | -----              | -----              | -----              | -----              | -----              | -----               | -----              | 454  |
| Choloepus_hoffmanni         | -----              | -----              | -----              | -----              | -----              | -----               | -----              | 444  |
| Vicugna_pacos               | -----              | -----              | -----              | -----              | -----              | -----               | -----              | 474  |
| Gavialis_gangeticus         | -----              | -----              | -----              | -----              | -----              | -----               | -----              | 470  |
| Mammalia                    | AGAT <b>CAGTTA</b> | TAG <b>AAAATAA</b> | AGA <b>AGCTACA</b> | TTTT <b>CTTTGC</b> | ACAT <b>CTGAGT</b> | GTA <b>GTGTGAG</b>  | TAA <b>ATTTGCG</b> | 1326 |
| Passeroidea                 | -----              | -----              | -----              | -----              | -----              | -----               | -----              | 641  |
| Takifugu                    | -----              | -----              | -----              | -----              | -----              | -----               | -----              | 629  |
| Pteropus_vampyrus           | -----              | -----              | -----              | -----              | -----              | -----               | -----              | 472  |
| Ornithorhynchus             | TTG <b>TTTCTCG</b> | TTG <b>TCTCC</b>   | GCT <b>GGTGGT</b>  | TAC <b>AGTTCCG</b> | TG <b>CTCACTCG</b> | GAT <b>AAACCGG</b>  | GC <b>CTGGTGCT</b> | 2764 |
| Oryctolagus_cuniculus       | -----              | -----              | -----              | -----              | -----              | -----               | -----              | 494  |
| Gallus_gallus               | -----              | -----              | -----              | -----              | -----              | -----               | -----              | 508  |
| Hominidae                   | NNT <b>CTCNAAA</b> | AT <b>NNNNNANC</b> | ANG <b>TNNCINN</b> | NN- <b>-CNCTNN</b> | GCG <b>TNANNTG</b> | GA <b>AGCTNCAN</b>  | ANN <b>CCNTACC</b> | 4935 |
| Metatheria                  | -----              | -----              | -----              | -----              | -----              | -----               | -----              | 569  |
| Rodentia                    | ACCA <b>ACCTGT</b> | CCC <b>ATCCCCT</b> | TG <b>CTGGGAAG</b> | GG <b>ACCTCCTA</b> | GCC <b>AAAGTGG</b> | GAG <b>CCTCTAT</b>  | TT <b>CTTTGCT</b>  | 2546 |
| Monodelphis                 | -----              | -----              | -----              | -----              | -----              | -----               | -----              | 857  |
| Consensus                   | -----              | -----              | -----              | -----              | -----              | -----               | -----              |      |
| Conservation                | 100%               | -----              | -----              | -----              | -----              | -----               | -----              | 0%   |



|                             | 8,700      | 8,720      | 8,740      |             |            |            |            |      |
|-----------------------------|------------|------------|------------|-------------|------------|------------|------------|------|
| Dipodomys_ordii             | -----      | -----      | -----      | 597         |            |            |            |      |
| Laurasiatheria              | -----      | -----      | -----      | 361         |            |            |            |      |
| Eutheria                    | -----      | -----      | -----      | 452         |            |            |            |      |
| Tarsius_syrichta            | -----      | -----      | -----      | 487         |            |            |            |      |
| Muridae                     | GTTATACCTA | GACTGGACAG | CCTAGCGCAG | GATGTCTCAG  | CCAGATGCCA | GGTTTGTGCT | CAAGTGAATC | 3068 |
| Gasterosteus_aculeatus      | -----      | -----      | -----      | 2399        |            |            |            |      |
| Felis_silvestris            | -----      | -----      | -----      | 505         |            |            |            |      |
| Rattus                      | -----      | -----      | -----      | 589         |            |            |            |      |
| Papio_hamadryas             | CTCAGTACAC | AGTTCTTGTT | ATACCTCATA | CCAACAATGC  | AGATCAGGCA | ATAAGACATA | TTATACGGCT | 6036 |
| Pan_troglodytes             | CAGCCTTCCT | AAACCCACG  | AGAAAGCCTA | CTGTTGGATC  | AGCCTCAACA | TAGAGCCCTA | TTACTCCAGC | 3786 |
| Ailuropoda_melanoleuca      | -----      | -----      | -----      | 462         |            |            |            |      |
| Cavia_porcellus             | -----      | -----      | -----      | 527         |            |            |            |      |
| Ictidomys_tridecemlineatus  | -----      | -----      | -----      | 530         |            |            |            |      |
| Canis                       | -----      | -----      | -----      | 479         |            |            |            |      |
| Felis_catus                 | -----      | -----      | -----      | 423         |            |            |            |      |
| Ochotona_princeps           | -----      | -----      | -----      | 515         |            |            |            |      |
| Cercopithecidae             | AGTCAAACGG | GTGATTAAGG | GGTGCTAAGA | ATGGTTAATA  | TCAGGTGTAA | CAAGTGGTCC | GTCCTTGCCC | 2199 |
| Carnivora                   | -----      | -----      | -----      | 421         |            |            |            |      |
| Mus                         | ACCCTTGATT | TGGGGCCCC  | CTGCGGTAAT | GTGTCTCTCT  | TTCCTAAAGC | TGATGTAGAA | CTGGGACATA | 2241 |
| Mus_musculus                | -----      | -----      | -----      | 478         |            |            |            |      |
| Rattus_norvegicus           | -----      | -----      | -----      | 420         |            |            |            |      |
| Tursiops_truncatus          | -----      | -----      | -----      | 518         |            |            |            |      |
| Procavia_capensis           | -----      | -----      | -----      | 442         |            |            |            |      |
| Primates                    | -----      | -----      | -----      | 671         |            |            |            |      |
| Echinops_telfairi           | -----      | -----      | -----      | 473         |            |            |            |      |
| Sorex_araneus               | -----      | -----      | -----      | 494         |            |            |            |      |
| Canidae                     | -----      | -----      | -----      | 550         |            |            |            |      |
| Otolemur_garnettii          | -----      | -----      | -----      | 413         |            |            |            |      |
| Gallus                      | -----      | -----      | -----      | 633         |            |            |            |      |
| Callithrix_jacchus          | -----      | -----      | -----      | 495         |            |            |            |      |
| Crocodylus_porosus          | -----      | -----      | -----      | 527         |            |            |            |      |
| Erinaceus_europaeus         | -----      | -----      | -----      | 420         |            |            |            |      |
| rnd-6_family-7426-LTR-ERV1  | -----      | -----      | -----      | 1692        |            |            |            |      |
| Esox_lucius                 | -----      | -----      | -----      | 532         |            |            |            |      |
| Salmo_salar                 | -----      | -----      | -----      | 801         |            |            |            |      |
| Didelphidae                 | -----      | -----      | -----      | 642         |            |            |            |      |
| Latimeria_chalumnae         | -----      | -----      | -----      | 1766        |            |            |            |      |
| Monodelphis_domestica       | -----      | -----      | -----      | 543         |            |            |            |      |
| Macropus_eugenii            | -----      | -----      | -----      | 509         |            |            |            |      |
| Alligator_mississippiensis  | -----      | -----      | -----      | 566         |            |            |            |      |
| Chrysemys_picta_bellii      | GGCCATTTTG | TGGTGTTCC  | CGACTGGGGG | GTCTCTGGTT  | TGTTGTTCTG | TCCTGTTAGG | TATTTCCCCC | 3511 |
| Danio_rerio                 | -----      | -----      | -----      | 699         |            |            |            |      |
| Taeniopygia                 | -----      | -----      | -----      | 538         |            |            |            |      |
| Dasybus_novemcinctus        | -----      | -----      | -----      | 512         |            |            |            |      |
| LTR_XT                      | -----      | -----      | -----      | 503         |            |            |            |      |
| Haplorrhini                 | TAGCTATAAT | TGGAGGATGT | CTAATACTGC | CTTGTCTTTT  | ACCTCTCCTC | ATCAGAAGCA | TCCAGTCTAC | 8641 |
| Catarrhini                  | TAATAGTAAT | AGGAACCTGC | TTACTGCTCC | CTTGTGTTGCT | ACCTGTACTT | CTTCAAATGA | TAAAAAGCTT | 7706 |
| Anolis_carolinensis         | -----      | -----      | -----      | 1184        |            |            |            |      |
| Murine_leukemia_virus       | -----      | -----      | -----      | 7615        |            |            |            |      |
| Phascolarctos_cinereus      | -----      | -----      | -----      | 7426        |            |            |            |      |
| Estrildidae                 | -----      | -----      | -----      | 482         |            |            |            |      |
| Xenopus_Silurana_tropicalis | -----      | -----      | -----      | 812         |            |            |            |      |
| L_XT                        | -----      | -----      | -----      | 7509        |            |            |            |      |
| Takifugu_rubripes           | -----      | -----      | -----      | 707         |            |            |            |      |
| Bos_taurus                  | -----      | -----      | -----      | 533         |            |            |            |      |
| Homo_sapiens                | -----      | -----      | -----      | 450         |            |            |            |      |
| Microcebus_murinus          | -----      | -----      | -----      | 428         |            |            |            |      |
| Myotis_lucifugus            | -----      | -----      | -----      | 432         |            |            |            |      |
| Equus_caballus              | -----      | -----      | -----      | 450         |            |            |            |      |
| Tupaia_belangeri            | -----      | -----      | -----      | 498         |            |            |            |      |
| Loxodonta_africana          | -----      | -----      | -----      | 460         |            |            |            |      |
| Murinae                     | -----      | -----      | -----      | 489         |            |            |            |      |
| Canis_lupus_familiaris      | -----      | -----      | -----      | 536         |            |            |            |      |
| Sus_scrofa                  | -----      | -----      | -----      | 454         |            |            |            |      |
| Choloepus_hoffmanni         | -----      | -----      | -----      | 444         |            |            |            |      |
| Vicugna_pacos               | -----      | -----      | -----      | 474         |            |            |            |      |
| Gavialis_gangeticus         | -----      | -----      | -----      | 470         |            |            |            |      |
| Mammalia                    | ACCCCGCTAC | A          | -----      | 1337        |            |            |            |      |
| Passeroidea                 | -----      | -----      | -----      | 641         |            |            |            |      |
| Takifugu                    | -----      | -----      | -----      | 629         |            |            |            |      |
| Pteropus_vampyrus           | -----      | -----      | -----      | 472         |            |            |            |      |
| Ornithorhynchus             | CGGGGCCAG  | GACCGGGGA  | C          | -----       | 2785       |            |            |      |
| Oryctolagus_cuniculus       | -----      | -----      | -----      | 494         |            |            |            |      |
| Gallus_gallus               | -----      | -----      | -----      | 508         |            |            |            |      |
| Hominidae                   | NNCCNCANTC | NTCTGGN    | AAAGTNGAAN | GNGCNAACNG  | CCTNNTCAA  | NAACACCTNA | NNAANTNNC  | 5002 |
| Metatheria                  | -----      | -----      | -----      | 569         |            |            |            |      |
| Rodentia                    | CCCCCATCC  | GCTTGACCCC | AGGCTGCCTA | GCACCNCTTC  | CCCTTCCCTC | CTCCTCCTCC | AAACCACACA | 2616 |
| Monodelphis                 | -----      | -----      | -----      | 857         |            |            |            |      |
| Consensus                   | -----      | -----      | -----      | -----       |            |            |            |      |
| Conservation                | 100%       | -----      | -----      | -----       |            |            |            |      |
|                             | 0%         | -----      | -----      | -----       |            |            |            |      |

|                             | 8,760      | 8,780      | 8,800        | 8,820      |            |            |             |       |
|-----------------------------|------------|------------|--------------|------------|------------|------------|-------------|-------|
| Dipodomys_ordii             | -----      | -----      | -----        | -----      | 597        |            |             |       |
| Laurasiatheria              | -----      | -----      | -----        | -----      | 361        |            |             |       |
| Eutheria                    | -----      | -----      | -----        | -----      | 452        |            |             |       |
| Tarsius_syrichta            | -----      | -----      | -----        | -----      | 487        |            |             |       |
| Muridae                     | CAAAACAGAG | AGCCCTTACC | CAGGAAGGGG   | TCCAATGAG  | AGACCAACAC | CCTGGCAAAC | TCTGGGAAAA  | 3138  |
| Gasterosteus_aculeatus      | -----      | -----      | -----        | -----      | 2399       |            |             |       |
| Felis_silvestris            | -----      | -----      | -----        | -----      | 505        |            |             |       |
| Rattus                      | -----      | -----      | -----        | -----      | 589        |            |             |       |
| Papio_hamadryas             | ACTCTGCTAA | AAACACAAAC | TGGGGGCACC   | AGTGATGTAC | AA-GTATTAG | GATCCACCAA | CAAACCTTATA | 6105  |
| Pan_troglodytes             | ATTCTGTGAG | GACAACAAAA | CTACAGCGTA   | ACCTGTGCC  | GTCACAAAAA | AAATCCCATG | GATTCCTCA   | 3856  |
| Ailuropoda_melanoleuca      | -----      | -----      | -----        | -----      | 462        |            |             |       |
| Cavia_porcellus             | -----      | -----      | -----        | -----      | 527        |            |             |       |
| Ictidomys_tridecemlineatus  | -----      | -----      | -----        | -----      | 530        |            |             |       |
| Canis                       | -----      | -----      | -----        | -----      | 479        |            |             |       |
| Felis_catus                 | -----      | -----      | -----        | -----      | 423        |            |             |       |
| Ochotona_princeps           | -----      | -----      | -----        | -----      | 515        |            |             |       |
| Cercopithecidae             | TTTTTTTGCC | TGTTTTAATT | AATGTCTACC   | AAAAGATGTG | GGAA       | -----      | -----       | 2243  |
| Carnivora                   | -----      | -----      | -----        | -----      | 421        |            |             |       |
| Mus                         | AAGACTACGG | GTGCCCAGTT | AGTGGGACCG   | TCTGTGCACG | AGGGACGACC | GTGGAAGGCC | TATGTCTTGA  | 2311  |
| Mus_musculus                | -----      | -----      | -----        | -----      | 478        |            |             |       |
| Rattus_norvegicus           | -----      | -----      | -----        | -----      | 420        |            |             |       |
| Tursiops_truncatus          | -----      | -----      | -----        | -----      | 518        |            |             |       |
| Procavia_capensis           | -----      | -----      | -----        | -----      | 442        |            |             |       |
| Primates                    | -----      | -----      | -----        | -----      | 671        |            |             |       |
| Echinops_telfairi           | -----      | -----      | -----        | -----      | 473        |            |             |       |
| Sorex_araneus               | -----      | -----      | -----        | -----      | 494        |            |             |       |
| Canidae                     | -----      | -----      | -----        | -----      | 550        |            |             |       |
| Otolemur_garnettii          | -----      | -----      | -----        | -----      | 413        |            |             |       |
| Gallus                      | -----      | -----      | -----        | -----      | 633        |            |             |       |
| Callithrix_jacchus          | -----      | -----      | -----        | -----      | 495        |            |             |       |
| Crocodylus_porosus          | -----      | -----      | -----        | -----      | 527        |            |             |       |
| Erinaceus_europaeus         | -----      | -----      | -----        | -----      | 420        |            |             |       |
| rnd-6_family-7426-LTR-ERV1  | -----      | -----      | -----        | -----      | 1692       |            |             |       |
| Esox_lucius                 | -----      | -----      | -----        | -----      | 532        |            |             |       |
| Salmo_salar                 | -----      | -----      | -----        | -----      | 801        |            |             |       |
| Didelphidae                 | -----      | -----      | -----        | -----      | 642        |            |             |       |
| Latimeria_chalumnae         | -----      | -----      | -----        | -----      | 1766       |            |             |       |
| Monodelphis_domestica       | -----      | -----      | -----        | -----      | 543        |            |             |       |
| Macropus_eugenii            | -----      | -----      | -----        | -----      | 509        |            |             |       |
| Alligator_mississippiensis  | -----      | -----      | -----        | -----      | 566        |            |             |       |
| Chrysemys_picta_bellii      | TCCCAATTAT | TCATAATCCT | GCAGGAGTAA   | ACATTTTGTG | TAGAAATCGC | AATGTGATGC | AAAGAGG     | 3578  |
| Danio_rerio                 | -----      | -----      | -----        | -----      | 699        |            |             |       |
| Taeniopygia                 | -----      | -----      | -----        | -----      | 538        |            |             |       |
| Dasybus_novemcinctus        | -----      | -----      | -----        | -----      | 512        |            |             |       |
| LTR_XT                      | -----      | -----      | -----        | -----      | 503        |            |             |       |
| Haplorrhini                 | TATTGAAGCA | ATAGTGGACC | GAACAACACTAC | CACCAAATA  | ATGGCACTAC | AAAAATACCA | ACCGTCC-C   | 8710  |
| Catarrhini                  | CATCGCTACC | TTAGTTTACC | AAAATGCT     | TCAGCACA   | AGTGTACTAT | ATGAATCACT | ATCGATCTGT  | 7772  |
| Anolis_carolinensis         | -----      | -----      | -----        | -----      | 1184       |            |             |       |
| Murine_leukemia_virus       | -----      | -----      | -----        | -----      | 7615       |            |             |       |
| Phascolarctos_cinereus      | -----      | -----      | -----        | -----      | 7426       |            |             |       |
| Estrildidae                 | -----      | -----      | -----        | -----      | 482        |            |             |       |
| Xenopus_Silurana_tropicalis | -----      | -----      | -----        | -----      | 812        |            |             |       |
| L_XT                        | -----      | -----      | -----        | -----      | 7509       |            |             |       |
| Takifugu_rubripes           | -----      | -----      | -----        | -----      | 707        |            |             |       |
| Bos_taurus                  | -----      | -----      | -----        | -----      | 533        |            |             |       |
| Homo_sapiens                | -----      | -----      | -----        | -----      | 450        |            |             |       |
| Microcebus_murinus          | -----      | -----      | -----        | -----      | 428        |            |             |       |
| Myotis_lucifugus            | -----      | -----      | -----        | -----      | 432        |            |             |       |
| Equus_caballus              | -----      | -----      | -----        | -----      | 450        |            |             |       |
| Tupaia_belangeri            | -----      | -----      | -----        | -----      | 498        |            |             |       |
| Loxodonta_africana          | -----      | -----      | -----        | -----      | 460        |            |             |       |
| Murinae                     | -----      | -----      | -----        | -----      | 489        |            |             |       |
| Canis_lupus_familiaris      | -----      | -----      | -----        | -----      | 536        |            |             |       |
| Sus_scrofa                  | -----      | -----      | -----        | -----      | 454        |            |             |       |
| Choloepus_hoffmanni         | -----      | -----      | -----        | -----      | 444        |            |             |       |
| Vicugna_pacos               | -----      | -----      | -----        | -----      | 474        |            |             |       |
| Gavialis_gangeticus         | -----      | -----      | -----        | -----      | 470        |            |             |       |
| Mammalia                    | -----      | -----      | -----        | -----      | 1337       |            |             |       |
| Passeroidea                 | -----      | -----      | -----        | -----      | 641        |            |             |       |
| Takifugu                    | -----      | -----      | -----        | -----      | 629        |            |             |       |
| Pteropus_vampyrus           | -----      | -----      | -----        | -----      | 472        |            |             |       |
| Ornithorhynchus             | -----      | -----      | -----        | -----      | 2785       |            |             |       |
| Oryctolagus_cuniculus       | -----      | -----      | -----        | -----      | 494        |            |             |       |
| Gallus_gallus               | -----      | -----      | -----        | -----      | 508        |            |             |       |
| Hominidae                   | TCTNGANACN | NNNCNNTCGT | GGGTNACCNT   | NCTNCCNTNN | GCCCTNNCNC | GNCTCCGGGC | AGCNCCCNGN  | 5072  |
| Metatheria                  | -----      | -----      | -----        | -----      | 569        |            |             |       |
| Rodentia                    | ATCTGACACA | CCTTTTCCCT | TGCCAGCCTC   | CTCCGGGGAT | CCCCAGGTAT | GGGACCCCAA | ACCCCTCTAT  | 2686  |
| Monodelphis                 | -----      | -----      | -----        | -----      | 857        |            |             |       |
| Consensus                   | -----      | -----      | -----        | -----      | -----      | -----      | -----       | ----- |
| Conservation                | 100%<br>0% |            |              |            |            |            |             |       |

|                             | 8,840      | 8,860      | 8,880      |            |            |            |            |      |
|-----------------------------|------------|------------|------------|------------|------------|------------|------------|------|
| Dipodomys_ordii             |            |            |            | 597        |            |            |            |      |
| Laurasiatheria              |            |            |            | 361        |            |            |            |      |
| Eutheria                    |            |            |            | 452        |            |            |            |      |
| Tarsius_syrichta            |            |            |            | 487        |            |            |            |      |
| Muridae                     | CTGACTTCAC | CAAGATCTGG | CCTGCCAGGG | GAGGATAAAA | GTACTTGCTA | GTTTTATAG  | ATACCTTTTC | 3208 |
| Gasterosteus_aculeatus      |            |            |            | 2399       |            |            |            |      |
| Felis_silvestris            |            |            |            | 505        |            |            |            |      |
| Rattus                      |            |            |            | 589        |            |            |            |      |
| Papio_hamdryas              | CAATCTCCCT | GTAATGGCAT | AAAAGGGCAG | TCTATTTGCT | GGAGCACTAC | AGCTCCTATC | CACGTCTCTG | 6175 |
| Pan_troglodytes             | CCCTATGGGA | GGCTGGGAGG | CCTAGGTCAA | CCACAATGGC | TGAGATCAGG | ATCTTCCTAC | TACTCCCTCA | 3926 |
| Ailuropoda_melanoleuca      |            |            |            | 462        |            |            |            |      |
| Cavia_porcellus             |            |            |            | 527        |            |            |            |      |
| Ictidomys_tridecemlineatus  |            |            |            | 530        |            |            |            |      |
| Canis                       |            |            |            | 479        |            |            |            |      |
| Felis_catus                 |            |            |            | 423        |            |            |            |      |
| Ochotona_princeps           |            |            |            | 515        |            |            |            |      |
| Cercopithecidae             |            |            |            | 2243       |            |            |            |      |
| Carnivora                   |            |            |            | 421        |            |            |            |      |
| Mus                         | CACGGAAGTG | AATCCTGGTC | CACGCTCCCA | CTAAGCCAC  | AGATTGACCT | TAGGCCTTCA | CACCTGGCTG | 2381 |
| Mus_musculus                |            |            |            | 478        |            |            |            |      |
| Rattus_norvegicus           |            |            |            | 420        |            |            |            |      |
| Tursiops_truncatus          |            |            |            | 518        |            |            |            |      |
| Procavia_capensis           |            |            |            | 442        |            |            |            |      |
| Primates                    |            |            |            | 671        |            |            |            |      |
| Echinops_telfairi           |            |            |            | 473        |            |            |            |      |
| Sorex_araneus               |            |            |            | 494        |            |            |            |      |
| Canidae                     |            |            |            | 550        |            |            |            |      |
| Otolemur_garnettii          |            |            |            | 413        |            |            |            |      |
| Gallus                      |            |            |            | 633        |            |            |            |      |
| Callithrix_jacchus          |            |            |            | 495        |            |            |            |      |
| Crocodylus_porosus          |            |            |            | 527        |            |            |            |      |
| Erinaceus_europaeus         |            |            |            | 420        |            |            |            |      |
| rnd-6_family-7426-LTR-ERV1  |            |            |            | 1692       |            |            |            |      |
| Esox_lucius                 |            |            |            | 532        |            |            |            |      |
| Salmo_salar                 |            |            |            | 801        |            |            |            |      |
| Didelphidae                 |            |            |            | 642        |            |            |            |      |
| Latimeria_chalumnae         |            |            |            | 1766       |            |            |            |      |
| Monodelphis_domestica       |            |            |            | 543        |            |            |            |      |
| Macropus_eugenii            |            |            |            | 509        |            |            |            |      |
| Alligator_mississippiensis  |            |            |            | 566        |            |            |            |      |
| Chrysemys_picta_bellii      |            |            |            | 3578       |            |            |            |      |
| Danio_rerio                 |            |            |            | 699        |            |            |            |      |
| Taeniopygia                 |            |            |            | 538        |            |            |            |      |
| Dasybus_novemcinctus        |            |            |            | 512        |            |            |            |      |
| LTR_XT                      |            |            |            | 503        |            |            |            |      |
| Haplorrhini                 | CCAGGAAGAA | TATGTGCCTA | CACAGGAAGA | GATAAACGAT | TGTGGTGCTC | TTTATTAATC | TACATTTATG | 8780 |
| Catarrhini                  | CTTGCAAGAA | GACATGGGTA | GTGAGAATGA | AAGTGAGAAC | T-----CCC  | ACTATTGAGT | GAGATTC--- | 7833 |
| Anolis_carolinensis         |            |            |            | 1184       |            |            |            |      |
| Murine_leukemia_virus       |            |            |            | 7615       |            |            |            |      |
| Phascolarctos_cinereus      |            |            |            | 7426       |            |            |            |      |
| Estrildidae                 |            |            |            | 482        |            |            |            |      |
| Xenopus_Silurana_tropicalis |            |            |            | 812        |            |            |            |      |
| L_XT                        |            |            |            | 7509       |            |            |            |      |
| Takifugu_rubripes           |            |            |            | 707        |            |            |            |      |
| Bos_taurus                  |            |            |            | 533        |            |            |            |      |
| Homo_sapiens                |            |            |            | 450        |            |            |            |      |
| Microcebus_murinus          |            |            |            | 428        |            |            |            |      |
| Myotis_lucifugus            |            |            |            | 432        |            |            |            |      |
| Equus_caballus              |            |            |            | 450        |            |            |            |      |
| Tupaia_belangeri            |            |            |            | 498        |            |            |            |      |
| Loxodonta_africana          |            |            |            | 460        |            |            |            |      |
| Murinae                     |            |            |            | 489        |            |            |            |      |
| Canis_lupus_familiaris      |            |            |            | 536        |            |            |            |      |
| Sus_scrofa                  |            |            |            | 454        |            |            |            |      |
| Choloepus_hoffmanni         |            |            |            | 444        |            |            |            |      |
| Vicugna_pacos               |            |            |            | 474        |            |            |            |      |
| Gavialis_gangeticus         |            |            |            | 470        |            |            |            |      |
| Mammalia                    |            |            |            | 1337       |            |            |            |      |
| Passeroidea                 |            |            |            | 641        |            |            |            |      |
| Takifugu                    |            |            |            | 629        |            |            |            |      |
| Pteropus_vampyrus           |            |            |            | 472        |            |            |            |      |
| Ornithorhynchus             |            |            |            | 2785       |            |            |            |      |
| Oryctolagus_cuniculus       |            |            |            | 494        |            |            |            |      |
| Gallus_gallus               |            |            |            | 508        |            |            |            |      |
| Hominidae                   | NGCCCCACAG | GNCTNAGCCC | CTTNGAACTN | CTNTACGGNC | GCCCCTTCTT | NNTTCNNGNN | CTNCCNNNNA | 5142 |
| Metatheria                  |            |            |            | 569        |            |            |            |      |
| Rodentia                    | AGCCAAACA- | ---TCACCCC | CCTCTCATCA | TCCAGTGAC  | GGCCAGTCTT | GNCTCCTGGC | CCATGTCTCA | 2752 |
| Monodelphis                 |            |            |            | 857        |            |            |            |      |
| Consensus                   |            |            |            |            |            |            |            |      |
| Conservation                | 100%<br>0% |            |            |            |            |            |            |      |

|                             | 8,900      | 8,920      | 8,940      | 8,960      |            |            |            |       |
|-----------------------------|------------|------------|------------|------------|------------|------------|------------|-------|
| Dipodomys_ordii             | -----      | -----      | -----      | -----      | 597        |            |            |       |
| Laurasiatheria              | -----      | -----      | -----      | -----      | 361        |            |            |       |
| Eutheria                    | -----      | -----      | -----      | -----      | 452        |            |            |       |
| Tarsius_syrichta            | -----      | -----      | -----      | -----      | 487        |            |            |       |
| Muridae                     | CAGGTGGGTA | GAAGCGTTCC | CCACCCGGAC | TGAAACTGCT | CAAATAGTAG | CTAAAAAGCT | CCTCCAGGAA | 3278  |
| Gasterosteus_aculeatus      | -----      | -----      | -----      | -----      | 2399       |            |            |       |
| Felis_silvestris            | -----      | -----      | -----      | -----      | 505        |            |            |       |
| Rattus                      | -----      | -----      | -----      | -----      | 589        |            |            |       |
| Papio_hamadryas             | ATGGAGGAGG | TCCATTAGAC | ACCACAAGAA | TAAAAAGTGT | TCAGAGAAAA | CTGGAAGAAA | TTCATAAAGC | 6245  |
| Pan_troglodytes             | GTATCAAACG | GGGTGATATT | AAAGGGGTGT | CTAAGAATGT | TGTTTAATAT | CGGTGTAAGA | CCCAAACAGT | 3996  |
| Ailuropoda_melanoleuca      | -----      | -----      | -----      | -----      | 462        |            |            |       |
| Cavia_porcellus             | -----      | -----      | -----      | -----      | 527        |            |            |       |
| Ictidomys_tridecemlineatus  | -----      | -----      | -----      | -----      | 530        |            |            |       |
| Canis                       | -----      | -----      | -----      | -----      | 479        |            |            |       |
| Felis_catus                 | -----      | -----      | -----      | -----      | 423        |            |            |       |
| Ochotona_princeps           | -----      | -----      | -----      | -----      | 515        |            |            |       |
| Cercopithecidae             | -----      | -----      | -----      | -----      | 2243       |            |            |       |
| Carnivora                   | -----      | -----      | -----      | -----      | 421        |            |            |       |
| Mus                         | AACTATGGTA | TCTTTCTGTT | ATAAACGAGA | GTTAGAAACG | AAGTCAAGTG | GTCTTTTCTC | CCTACTCTAT | 2451  |
| Mus_musculus                | -----      | -----      | -----      | -----      | 478        |            |            |       |
| Rattus_norvegicus           | -----      | -----      | -----      | -----      | 420        |            |            |       |
| Tursiops_truncatus          | -----      | -----      | -----      | -----      | 518        |            |            |       |
| Procavia_capensis           | -----      | -----      | -----      | -----      | 442        |            |            |       |
| Primates                    | -----      | -----      | -----      | -----      | 671        |            |            |       |
| Echinops_telfairi           | -----      | -----      | -----      | -----      | 473        |            |            |       |
| Sorex_araneus               | -----      | -----      | -----      | -----      | 494        |            |            |       |
| Canidae                     | -----      | -----      | -----      | -----      | 550        |            |            |       |
| Otolemur_garnettii          | -----      | -----      | -----      | -----      | 413        |            |            |       |
| Gallus                      | -----      | -----      | -----      | -----      | 633        |            |            |       |
| Callithrix_jacchus          | -----      | -----      | -----      | -----      | 495        |            |            |       |
| Crocodylus_porosus          | -----      | -----      | -----      | -----      | 527        |            |            |       |
| Erinaceus_europaeus         | -----      | -----      | -----      | -----      | 420        |            |            |       |
| rnd-6_family-7426-LTR-ERV1  | -----      | -----      | -----      | -----      | 1692       |            |            |       |
| Esox_lucius                 | -----      | -----      | -----      | -----      | 532        |            |            |       |
| Salmo_salar                 | -----      | -----      | -----      | -----      | 801        |            |            |       |
| Didelphidae                 | -----      | -----      | -----      | -----      | 642        |            |            |       |
| Latimeria_chalumnae         | -----      | -----      | -----      | -----      | 1766       |            |            |       |
| Monodelphis_domestica       | -----      | -----      | -----      | -----      | 543        |            |            |       |
| Macropus_eugenii            | -----      | -----      | -----      | -----      | 509        |            |            |       |
| Alligator_mississippiensis  | -----      | -----      | -----      | -----      | 566        |            |            |       |
| Chrysemys_picta_bellii      | -----      | -----      | -----      | -----      | 3578       |            |            |       |
| Danio_rerio                 | -----      | -----      | -----      | -----      | 699        |            |            |       |
| Taeniopygia                 | -----      | -----      | -----      | -----      | 538        |            |            |       |
| Dasybus_novemcinctus        | -----      | -----      | -----      | -----      | 512        |            |            |       |
| LTR_XT                      | -----      | -----      | -----      | -----      | 503        |            |            |       |
| Haplorrhini                 | GCGAGCACCA | AAGGGGGGGA | A          | -----      | -----      | -----      | -----      | 8801  |
| Catarrhini                  | -----TCA   | AAGGCGGGGA | A          | -----      | -----      | -----      | -----      | 7847  |
| Anolis_carolinensis         | -----      | -----      | -----      | -----      | -----      | -----      | -----      | 1184  |
| Murine_leukemia_virus       | -----      | -----      | -----      | -----      | -----      | -----      | -----      | 7615  |
| Phascolarctos_cinereus      | -----      | -----      | -----      | -----      | -----      | -----      | -----      | 7426  |
| Estrildidae                 | -----      | -----      | -----      | -----      | -----      | -----      | -----      | 482   |
| Xenopus_Silurana_tropicalis | -----      | -----      | -----      | -----      | -----      | -----      | -----      | 812   |
| L_XT                        | -----      | -----      | -----      | -----      | -----      | -----      | -----      | 7509  |
| Takifugu_rubripes           | -----      | -----      | -----      | -----      | -----      | -----      | -----      | 707   |
| Bos_taurus                  | -----      | -----      | -----      | -----      | -----      | -----      | -----      | 533   |
| Homo_sapiens                | -----      | -----      | -----      | -----      | -----      | -----      | -----      | 450   |
| Microcebus_murinus          | -----      | -----      | -----      | -----      | -----      | -----      | -----      | 428   |
| Myotis_lucifugus            | -----      | -----      | -----      | -----      | -----      | -----      | -----      | 432   |
| Equus_caballus              | -----      | -----      | -----      | -----      | -----      | -----      | -----      | 450   |
| Tupaia_belangeri            | -----      | -----      | -----      | -----      | -----      | -----      | -----      | 498   |
| Loxodonta_africana          | -----      | -----      | -----      | -----      | -----      | -----      | -----      | 460   |
| Murinae                     | -----      | -----      | -----      | -----      | -----      | -----      | -----      | 489   |
| Canis_lupus_familiaris      | -----      | -----      | -----      | -----      | -----      | -----      | -----      | 536   |
| Sus_scrofa                  | -----      | -----      | -----      | -----      | -----      | -----      | -----      | 454   |
| Choloepus_hoffmanni         | -----      | -----      | -----      | -----      | -----      | -----      | -----      | 444   |
| Vicugna_pacos               | -----      | -----      | -----      | -----      | -----      | -----      | -----      | 474   |
| Gavialis_gangeticus         | -----      | -----      | -----      | -----      | -----      | -----      | -----      | 470   |
| Mammalia                    | -----      | -----      | -----      | -----      | -----      | -----      | -----      | 1337  |
| Passeroidea                 | -----      | -----      | -----      | -----      | -----      | -----      | -----      | 641   |
| Takifugu                    | -----      | -----      | -----      | -----      | -----      | -----      | -----      | 629   |
| Pteropus_vampyrus           | -----      | -----      | -----      | -----      | -----      | -----      | -----      | 472   |
| Ornithorhynchus             | -----      | -----      | -----      | -----      | -----      | -----      | -----      | 2785  |
| Oryctolagus_cuniculus       | -----      | -----      | -----      | -----      | -----      | -----      | -----      | 494   |
| Gallus_gallus               | -----      | -----      | -----      | -----      | -----      | -----      | -----      | 508   |
| Hominidae                   | NTNTTTCGCC | CCCNCNCTN  | GNNNCNTANC | TNCCNTANCT | NACCCTNNTN | NGNGANCTNC | TNNGNANCA  | 5212  |
| Metatheria                  | -----      | -----      | -----      | -----      | -----      | -----      | -----      | 569   |
| Rodentia                    | CTATCA     | CTCTCCCTGA | TCACCTNCTT | ACTCCTCTGT | CACACTATNT | TCGCACCTCC | TTGGAACTCA | 2819  |
| Monodelphis                 | -----      | -----      | -----      | -----      | -----      | -----      | -----      | 857   |
| Consensus                   | -----      | -----      | -----      | -----      | -----      | -----      | -----      | ----- |
| Conservation                | 100%       | -----      | -----      | -----      | -----      | -----      | -----      | 0%    |

|                             | 8,980         | 9,000       | 9,020       |               |            |                     |            |      |
|-----------------------------|---------------|-------------|-------------|---------------|------------|---------------------|------------|------|
| Dipodomys_ordii             |               |             |             | 597           |            |                     |            |      |
| Laurasiatheria              |               |             |             | 361           |            |                     |            |      |
| Eutheria                    |               |             |             | 452           |            |                     |            |      |
| Tarsius_syrichta            |               |             |             | 487           |            |                     |            |      |
| Muridae                     | CTGGTCCCCT    | GATTTGGCCT  | CCCCCTAGCA  | ATGGGGTCCG    | ACAATGGCCT | GGCTTTTCATA         | GCCAAAACCT | 3348 |
| Gasterosteus_aculeatus      |               |             |             | 2399          |            |                     |            |      |
| Felis_silvestris            |               |             |             | 505           |            |                     |            |      |
| Rattus                      |               |             |             | 589           |            |                     |            |      |
| Papio_hamadryas             | CCTATATCCT    | GAAC TTCAGT | ATCACCC TTT | GGCCATACCT    | AAGGTTAGAG | ATAACCTCAT          | GGTCGATGCC | 6315 |
| Pan_troglodytes             | AACA - AAGAA  | GAACATTGAT  | AACATCTGTT  | TCTCTCCCT     | CCTGGCCCCT | GTTTTTTTAC          | TGCCGTGTTT | 4065 |
| Ailuropoda_melanoleuca      |               |             |             | 462           |            |                     |            |      |
| Cavia_porcellus             |               |             |             | 527           |            |                     |            |      |
| Ictidomys_tridecemlineatus  |               |             |             | 530           |            |                     |            |      |
| Canis                       |               |             |             | 479           |            |                     |            |      |
| Felis_catus                 |               |             |             | 423           |            |                     |            |      |
| Ochotona_princeps           |               |             |             | 515           |            |                     |            |      |
| Cercopithecidae             |               |             |             | 2243          |            |                     |            |      |
| Carnivora                   |               |             |             | 421           |            |                     |            |      |
| Mus                         | ATATAGCTTA    | ACAAGACAGG  | GTAATAGAAG  | AAACCCA - - - |            |                     |            | 2488 |
| Mus_musculus                |               |             |             | 478           |            |                     |            |      |
| Rattus_norvegicus           |               |             |             | 420           |            |                     |            |      |
| Tursiops_truncatus          |               |             |             | 518           |            |                     |            |      |
| Procavia_capensis           |               |             |             | 442           |            |                     |            |      |
| Primates                    |               |             |             | 671           |            |                     |            |      |
| Echinops_telfairi           |               |             |             | 473           |            |                     |            |      |
| Sorex_araneus               |               |             |             | 494           |            |                     |            |      |
| Canidae                     |               |             |             | 550           |            |                     |            |      |
| Otolemur_garnettii          |               |             |             | 413           |            |                     |            |      |
| Gallus                      |               |             |             | 633           |            |                     |            |      |
| Callithrix_jacchus          |               |             |             | 495           |            |                     |            |      |
| Crocodylus_porosus          |               |             |             | 527           |            |                     |            |      |
| Erinaceus_europaeus         |               |             |             | 420           |            |                     |            |      |
| rnd-6_family-7426-LTR-ERV1  |               |             |             | 1692          |            |                     |            |      |
| Esox_lucius                 |               |             |             | 532           |            |                     |            |      |
| Salmo_salar                 |               |             |             | 801           |            |                     |            |      |
| Didelphidae                 |               |             |             | 642           |            |                     |            |      |
| Latimeria_chalumnae         |               |             |             | 1766          |            |                     |            |      |
| Monodelphis_domestica       |               |             |             | 543           |            |                     |            |      |
| Macropus_eugenii            |               |             |             | 509           |            |                     |            |      |
| Alligator_mississippiensis  |               |             |             | 566           |            |                     |            |      |
| Chrysemys_picta_bellii      |               |             |             | 3578          |            |                     |            |      |
| Danio_rerio                 |               |             |             | 699           |            |                     |            |      |
| Taeniopygia                 |               |             |             | 538           |            |                     |            |      |
| Dasyopus_novemcinctus       |               |             |             | 512           |            |                     |            |      |
| LTR_XT                      |               |             |             | 503           |            |                     |            |      |
| Haplorrhini                 |               |             |             | 8801          |            |                     |            |      |
| Catarrhini                  |               |             |             | 7847          |            |                     |            |      |
| Anolis_carolinensis         |               |             |             | 1184          |            |                     |            |      |
| Murine_leukemia_virus       |               |             |             | 7615          |            |                     |            |      |
| Phascolarctos_cinereus      |               |             |             | 7426          |            |                     |            |      |
| Estrildidae                 |               |             |             | 482           |            |                     |            |      |
| Xenopus_Silurana_tropicalis |               |             |             | 812           |            |                     |            |      |
| L_XT                        |               |             |             | 7509          |            |                     |            |      |
| Takifugu_rubripes           |               |             |             | 707           |            |                     |            |      |
| Bos_taurus                  |               |             |             | 533           |            |                     |            |      |
| Homo_sapiens                |               |             |             | 450           |            |                     |            |      |
| Microcebus_murinus          |               |             |             | 428           |            |                     |            |      |
| Myotis_lucifugus            |               |             |             | 432           |            |                     |            |      |
| Equus_caballus              |               |             |             | 450           |            |                     |            |      |
| Tupaia_belangeri            |               |             |             | 498           |            |                     |            |      |
| Loxodonta_africana          |               |             |             | 460           |            |                     |            |      |
| Murinae                     |               |             |             | 489           |            |                     |            |      |
| Canis_lupus_familiaris      |               |             |             | 536           |            |                     |            |      |
| Sus_scrofa                  |               |             |             | 454           |            |                     |            |      |
| Choloepus_hoffmanni         |               |             |             | 444           |            |                     |            |      |
| Vicugna_pacos               |               |             |             | 474           |            |                     |            |      |
| Gavialis_gangeticus         |               |             |             | 470           |            |                     |            |      |
| Mammalia                    |               |             |             | 1337          |            |                     |            |      |
| Passeroidea                 |               |             |             | 641           |            |                     |            |      |
| Takifugu                    |               |             |             | 629           |            |                     |            |      |
| Pteropus_vampyrus           |               |             |             | 472           |            |                     |            |      |
| Ornithorhynchus             |               |             |             | 2785          |            |                     |            |      |
| Oryctolagus_cuniculus       |               |             |             | 494           |            |                     |            |      |
| Gallus_gallus               |               |             |             | 508           |            |                     |            |      |
| Hominidae                   | CGCNGACNNC    | NGCCTNCCNN  | ANCCN NNNCC | NNNCN NCCCN   | GACN NNCNG | NNNTNNTNNC          | NCCAGNGAT  | 5282 |
| Metatheria                  |               |             |             | 569           |            |                     |            |      |
| Rodentia                    | CCCA - - TCAC | TACTTGCCTC  | AGCCTCATCC  | TGACCCCTT     | CCCTCTCAA  | TCAACATCG - - - - - | GGGAC      | 2881 |
| Monodelphis                 |               |             |             | 857           |            |                     |            |      |
| Consensus                   |               |             |             |               |            |                     |            |      |
| Conservation                | 100%<br>0%    |             |             |               |            |                     |            |      |

|                             | 9,040      | 9,060      | 9,080      | 9,100       |            |            |            |       |
|-----------------------------|------------|------------|------------|-------------|------------|------------|------------|-------|
| Dipodomys_ordii             | -----      | -----      | -----      | -----       | 597        |            |            |       |
| Laurasiatheria              | -----      | -----      | -----      | -----       | 361        |            |            |       |
| Eutheria                    | -----      | -----      | -----      | -----       | 452        |            |            |       |
| Tarsius_syrichta            | -----      | -----      | -----      | -----       | 487        |            |            |       |
| Muridae                     | CTCAATTAAT | AGCTAAAGCT | TTAGACATAG | ATTGAAAAC   | TCATTGTGCA | TATAGACCTC | AGAGTTCTGG | 3418  |
| Gasterosteus_aculeatus      | -----      | -----      | -----      | -----       | 2399       |            |            |       |
| Felis_silvestris            | -----      | -----      | -----      | -----       | 505        |            |            |       |
| Rattus                      | -----      | -----      | -----      | -----       | 589        |            |            |       |
| Papio_hamadryas             | CAGACTTTAA | ACATTCTCAA | TGCCACTTAC | AACCTTACTCC | TAATGTCCAA | CACGAGCCTA | GTGGACGACT | 6385  |
| Pan_troglodytes             | ACGTTTTTAA | AGAAGTTAAG | T--CAATGCC | TACTACCACG  | TAACTAAGAG | ACCAAGATTG | CTAAAAAAAG | 4133  |
| Ailuropoda_melanoleuca      | -----      | -----      | -----      | -----       | 462        |            |            |       |
| Cavia_porcellus             | -----      | -----      | -----      | -----       | 527        |            |            |       |
| Ictidomys_tridecemlineatus  | -----      | -----      | -----      | -----       | 530        |            |            |       |
| Canis                       | -----      | -----      | -----      | -----       | 479        |            |            |       |
| Felis_catus                 | -----      | -----      | -----      | -----       | 423        |            |            |       |
| Ochotona_princeps           | -----      | -----      | -----      | -----       | 515        |            |            |       |
| Cercopithecidae             | -----      | -----      | -----      | -----       | 2243       |            |            |       |
| Carnivora                   | -----      | -----      | -----      | -----       | 421        |            |            |       |
| Mus                         | -----      | -----      | -----      | -----       | 2488       |            |            |       |
| Mus_musculus                | -----      | -----      | -----      | -----       | 478        |            |            |       |
| Rattus_norvegicus           | -----      | -----      | -----      | -----       | 420        |            |            |       |
| Tursiops_truncatus          | -----      | -----      | -----      | -----       | 518        |            |            |       |
| Procavia_capensis           | -----      | -----      | -----      | -----       | 442        |            |            |       |
| Primates                    | -----      | -----      | -----      | -----       | 671        |            |            |       |
| Echinops_telfairi           | -----      | -----      | -----      | -----       | 473        |            |            |       |
| Sorex_araneus               | -----      | -----      | -----      | -----       | 494        |            |            |       |
| Canidae                     | -----      | -----      | -----      | -----       | 550        |            |            |       |
| Otolemur_garnettii          | -----      | -----      | -----      | -----       | 413        |            |            |       |
| Gallus                      | -----      | -----      | -----      | -----       | 633        |            |            |       |
| Callithrix_jacchus          | -----      | -----      | -----      | -----       | 495        |            |            |       |
| Crocodylus_porosus          | -----      | -----      | -----      | -----       | 527        |            |            |       |
| Erinaceus_europaeus         | -----      | -----      | -----      | -----       | 420        |            |            |       |
| rnd-6_family-7426-LTR-ERV1  | -----      | -----      | -----      | -----       | 1692       |            |            |       |
| Esox_lucius                 | -----      | -----      | -----      | -----       | 532        |            |            |       |
| Salmo_salar                 | -----      | -----      | -----      | -----       | 801        |            |            |       |
| Didelphidae                 | -----      | -----      | -----      | -----       | 642        |            |            |       |
| Latimeria_chalumnae         | -----      | -----      | -----      | -----       | 1766       |            |            |       |
| Monodelphis_domestica       | -----      | -----      | -----      | -----       | 543        |            |            |       |
| Macropus_eugenii            | -----      | -----      | -----      | -----       | 509        |            |            |       |
| Alligator_mississippiensis  | -----      | -----      | -----      | -----       | 566        |            |            |       |
| Chrysemys_picta_bellii      | -----      | -----      | -----      | -----       | 3578       |            |            |       |
| Danio_rerio                 | -----      | -----      | -----      | -----       | 699        |            |            |       |
| Taeniopygia                 | -----      | -----      | -----      | -----       | 538        |            |            |       |
| Dasybus_novemcinctus        | -----      | -----      | -----      | -----       | 512        |            |            |       |
| LTR_XT                      | -----      | -----      | -----      | -----       | 503        |            |            |       |
| Haplorrhini                 | -----      | -----      | -----      | -----       | 8801       |            |            |       |
| Catarrhini                  | -----      | -----      | -----      | -----       | 7847       |            |            |       |
| Anolis_carolinensis         | -----      | -----      | -----      | -----       | 1184       |            |            |       |
| Murine_leukemia_virus       | -----      | -----      | -----      | -----       | 7615       |            |            |       |
| Phascolarctos_cinereus      | -----      | -----      | -----      | -----       | 7426       |            |            |       |
| Estrildidae                 | -----      | -----      | -----      | -----       | 482        |            |            |       |
| Xenopus_Silurana_tropicalis | -----      | -----      | -----      | -----       | 812        |            |            |       |
| L_XT                        | -----      | -----      | -----      | -----       | 7509       |            |            |       |
| Takifugu_rubripes           | -----      | -----      | -----      | -----       | 707        |            |            |       |
| Bos_taurus                  | -----      | -----      | -----      | -----       | 533        |            |            |       |
| Homo_sapiens                | -----      | -----      | -----      | -----       | 450        |            |            |       |
| Microcebus_murinus          | -----      | -----      | -----      | -----       | 428        |            |            |       |
| Myotis_lucifugus            | -----      | -----      | -----      | -----       | 432        |            |            |       |
| Equus_caballus              | -----      | -----      | -----      | -----       | 450        |            |            |       |
| Tupaia_belangeri            | -----      | -----      | -----      | -----       | 498        |            |            |       |
| Loxodonta_africana          | -----      | -----      | -----      | -----       | 460        |            |            |       |
| Murinae                     | -----      | -----      | -----      | -----       | 489        |            |            |       |
| Canis_lupus_familiaris      | -----      | -----      | -----      | -----       | 536        |            |            |       |
| Sus_scrofa                  | -----      | -----      | -----      | -----       | 454        |            |            |       |
| Choloepus_hoffmanni         | -----      | -----      | -----      | -----       | 444        |            |            |       |
| Vicugna_pacos               | -----      | -----      | -----      | -----       | 474        |            |            |       |
| Gavialis_gangeticus         | -----      | -----      | -----      | -----       | 470        |            |            |       |
| Mammalia                    | -----      | -----      | -----      | -----       | 1337       |            |            |       |
| Passeroidea                 | -----      | -----      | -----      | -----       | 641        |            |            |       |
| Takifugu                    | -----      | -----      | -----      | -----       | 629        |            |            |       |
| Pteropus_vampyrus           | -----      | -----      | -----      | -----       | 472        |            |            |       |
| Ornithorhynchus             | -----      | -----      | -----      | -----       | 2785       |            |            |       |
| Oryctolagus_cuniculus       | -----      | -----      | -----      | -----       | 494        |            |            |       |
| Gallus_gallus               | -----      | -----      | -----      | -----       | 508        |            |            |       |
| Hominidae                   | NNNGTNCN   | TNAANGANCT | NCAGNCNANN | NNNNTNNCCC  | CNCGGTGNN  | AGGCCCNTAN | ACNGTNATNC | 5352  |
| Metatheria                  | -----      | -----      | -----      | -----       | -----      | -----      | -----      | 569   |
| Rodentia                    | TTGGTCCTCC | CCTCTCNTCC | -----TG    | NTCACANCCC  | CCTAATGGAC | AGGCCCCTTT | AGGGTCATCC | 2943  |
| Monodelphis                 | -----      | -----      | -----      | -----       | -----      | -----      | -----      | 857   |
| Consensus                   | -----      | -----      | -----      | -----       | -----      | -----      | -----      | ----- |
| Conservation                | 100%       | -----      | -----      | -----       | -----      | -----      | -----      | 0%    |

|                             | 9,120       | 9,140      | 9,160       |            |             |            |            |      |
|-----------------------------|-------------|------------|-------------|------------|-------------|------------|------------|------|
| Dipodomys_ordii             |             |            |             | 597        |             |            |            |      |
| Laurasiatheria              |             |            |             | 361        |             |            |            |      |
| Eutheria                    |             |            |             | 452        |             |            |            |      |
| Tarsius_syrichta            |             |            |             | 487        |             |            |            |      |
| Muridae                     | GCAGGTA AAA | AGAATAAACA | GGACATTA AA | AGAAACTCTA | ACAAA ACTCT | CATTAGAGTC | CAGCGAAGGG | 3488 |
| Gasterosteus_aculeatus      |             |            |             | 2399       |             |            |            |      |
| Felis_silvestris            |             |            |             | 505        |             |            |            |      |
| Rattus                      |             |            |             | 589        |             |            |            |      |
| Papio_hamadryas             | GTTGGCTTTG  | TTTAAAATTA | GGTCCCCTTA  | CTCCCCTCGC | AATACCTAAC  | TTCTATTAT  | CCTACGTGAC | 6455 |
| Pan_troglodytes             | GGGGA       |            |             |            |             |            |            | 4138 |
| Ailuropoda_melanoleuca      |             |            |             |            |             |            |            | 462  |
| Cavia_porcellus             |             |            |             |            |             |            |            | 527  |
| Ictidomys_tridecemlineatus  |             |            |             |            |             |            |            | 530  |
| Canis                       |             |            |             |            |             |            |            | 479  |
| Felis_catus                 |             |            |             |            |             |            |            | 423  |
| Ochotona_princeps           |             |            |             |            |             |            |            | 515  |
| Cercopithecidae             |             |            |             |            |             |            |            | 2243 |
| Carnivora                   |             |            |             |            |             |            |            | 421  |
| Mus                         |             |            |             |            |             |            |            | 2488 |
| Mus_musculus                |             |            |             |            |             |            |            | 478  |
| Rattus_norvegicus           |             |            |             |            |             |            |            | 420  |
| Tursiops_truncatus          |             |            |             |            |             |            |            | 518  |
| Procavia_capensis           |             |            |             |            |             |            |            | 442  |
| Primates                    |             |            |             |            |             |            |            | 671  |
| Echinops_telfairi           |             |            |             |            |             |            |            | 473  |
| Sorex_araneus               |             |            |             |            |             |            |            | 494  |
| Canidae                     |             |            |             |            |             |            |            | 550  |
| Otolemur_garnettii          |             |            |             |            |             |            |            | 413  |
| Gallus                      |             |            |             |            |             |            |            | 633  |
| Callithrix_jacchus          |             |            |             |            |             |            |            | 495  |
| Crocodylus_porosus          |             |            |             |            |             |            |            | 527  |
| Erinaceus_europaeus         |             |            |             |            |             |            |            | 420  |
| rnd-6_family-7426-LTR-ERV1  |             |            |             |            |             |            |            | 1692 |
| Esox_lucius                 |             |            |             |            |             |            |            | 532  |
| Salmo_salar                 |             |            |             |            |             |            |            | 801  |
| Didelphidae                 |             |            |             |            |             |            |            | 642  |
| Latimeria_chalumnae         |             |            |             |            |             |            |            | 1766 |
| Monodelphis_domestica       |             |            |             |            |             |            |            | 543  |
| Macropus_eugenii            |             |            |             |            |             |            |            | 509  |
| Alligator_mississippiensis  |             |            |             |            |             |            |            | 566  |
| Chrysemys_picta_bellii      |             |            |             |            |             |            |            | 3578 |
| Danio_rerio                 |             |            |             |            |             |            |            | 699  |
| Taeniopygia                 |             |            |             |            |             |            |            | 538  |
| Dasybus_novemcinctus        |             |            |             |            |             |            |            | 512  |
| LTR_XT                      |             |            |             |            |             |            |            | 503  |
| Haplorrhini                 |             |            |             |            |             |            |            | 8801 |
| Catarrhini                  |             |            |             |            |             |            |            | 7847 |
| Anolis_carolinensis         |             |            |             |            |             |            |            | 1184 |
| Murine_leukemia_virus       |             |            |             |            |             |            |            | 7615 |
| Phascolarctos_cinereus      |             |            |             |            |             |            |            | 7426 |
| Estrildidae                 |             |            |             |            |             |            |            | 482  |
| Xenopus_Silurana_tropicalis |             |            |             |            |             |            |            | 812  |
| L_XT                        |             |            |             |            |             |            |            | 7509 |
| Takifugu_rubripes           |             |            |             |            |             |            |            | 707  |
| Bos_taurus                  |             |            |             |            |             |            |            | 533  |
| Homo_sapiens                |             |            |             |            |             |            |            | 450  |
| Microcebus_murinus          |             |            |             |            |             |            |            | 428  |
| Myotis_lucifugus            |             |            |             |            |             |            |            | 432  |
| Equus_caballus              |             |            |             |            |             |            |            | 450  |
| Tupaia_belangeri            |             |            |             |            |             |            |            | 498  |
| Loxodonta_africana          |             |            |             |            |             |            |            | 460  |
| Murinae                     |             |            |             |            |             |            |            | 489  |
| Canis_lupus_familiaris      |             |            |             |            |             |            |            | 536  |
| Sus_scrofa                  |             |            |             |            |             |            |            | 454  |
| Choloepus_hoffmanni         |             |            |             |            |             |            |            | 444  |
| Vicugna_pacos               |             |            |             |            |             |            |            | 474  |
| Gavialis_gangeticus         |             |            |             |            |             |            |            | 470  |
| Mammalia                    |             |            |             |            |             |            |            | 1337 |
| Passeroidea                 |             |            |             |            |             |            |            | 641  |
| Takifugu                    |             |            |             |            |             |            |            | 629  |
| Pteropus_vampyrus           |             |            |             |            |             |            |            | 472  |
| Ornithorhynchus             |             |            |             |            |             |            |            | 2785 |
| Oryctolagus_cuniculus       |             |            |             |            |             |            |            | 494  |
| Gallus_gallus               |             |            |             |            |             |            |            | 508  |
| Hominidae                   | TNACNACNCC  | GACGGCNGCT | AANNNTNNTAG | GNCTNCCNTC | CTGGTANCAT  | NTNTCNCANN | TNAAGANNGC | 5422 |
| Metatheria                  |             |            |             |            |             |            |            | 569  |
| Rodentia                    | TTACTACCCC  | AACTGCCGCT | AAGCTCGATG  | GTTTCCCTCA | CTGGATTGAT  | CTTTCTCATC | TCAAGCCCTT | 3013 |
| Monodelphis                 |             |            |             |            |             |            |            | 857  |
| Consensus                   |             |            |             |            |             |            |            |      |
| Conservation                | 100%        |            |             |            |             |            |            | 0%   |

|                             | 9,180      | 9,200      | 9,220      | 9,240       |            |            |            |       |
|-----------------------------|------------|------------|------------|-------------|------------|------------|------------|-------|
| Dipodomys_ordii             | -----      | -----      | -----      | -----       | 597        |            |            |       |
| Laurasiatheria              | -----      | -----      | -----      | -----       | 361        |            |            |       |
| Eutheria                    | -----      | -----      | -----      | -----       | 452        |            |            |       |
| Tarsius_syrichta            | -----      | -----      | -----      | -----       | 487        |            |            |       |
| Muridae                     | TGGATAGACC | TCCTTCCTTT | GCTTCGGGCC | GCTGCACCCC  | ATATAGGGAG | GGATTTACCC | CTCCCTATGA | 3558  |
| Gasterosteus_aculeatus      | -----      | -----      | -----      | -----       | 2399       |            |            |       |
| Felis_silvestris            | -----      | -----      | -----      | -----       | 505        |            |            |       |
| Rattus                      | -----      | -----      | -----      | -----       | 589        |            |            |       |
| Papio_hamadryas             | TGCCTCCTCG | GATAATATCT | CTTGTTTAAT | AATTCACCCC  | CTTCTAGTTC | AACCGATGCA | GTTTTCCAAT | 6525  |
| Pan_troglodytes             | -----      | -----      | -----      | -----       | 4138       |            |            |       |
| Ailuropoda_melanoleuca      | -----      | -----      | -----      | -----       | 462        |            |            |       |
| Cavia_porcellus             | -----      | -----      | -----      | -----       | 527        |            |            |       |
| Ictidomys_tridecemlineatus  | -----      | -----      | -----      | -----       | 530        |            |            |       |
| Canis                       | -----      | -----      | -----      | -----       | 479        |            |            |       |
| Felis_catus                 | -----      | -----      | -----      | -----       | 423        |            |            |       |
| Ochotona_princeps           | -----      | -----      | -----      | -----       | 515        |            |            |       |
| Cercopithecidae             | -----      | -----      | -----      | -----       | 2243       |            |            |       |
| Carnivora                   | -----      | -----      | -----      | -----       | 421        |            |            |       |
| Mus                         | -----      | -----      | -----      | -----       | 2488       |            |            |       |
| Mus_musculus                | -----      | -----      | -----      | -----       | 478        |            |            |       |
| Rattus_norvegicus           | -----      | -----      | -----      | -----       | 420        |            |            |       |
| Tursiops_truncatus          | -----      | -----      | -----      | -----       | 518        |            |            |       |
| Procavia_capensis           | -----      | -----      | -----      | -----       | 442        |            |            |       |
| Primates                    | -----      | -----      | -----      | -----       | 671        |            |            |       |
| Echinops_telfairi           | -----      | -----      | -----      | -----       | 473        |            |            |       |
| Sorex_araneus               | -----      | -----      | -----      | -----       | 494        |            |            |       |
| Canidae                     | -----      | -----      | -----      | -----       | 550        |            |            |       |
| Otolemur_garnettii          | -----      | -----      | -----      | -----       | 413        |            |            |       |
| Gallus                      | -----      | -----      | -----      | -----       | 633        |            |            |       |
| Callithrix_jacchus          | -----      | -----      | -----      | -----       | 495        |            |            |       |
| Crocodylus_porosus          | -----      | -----      | -----      | -----       | 527        |            |            |       |
| Erinaceus_europaeus         | -----      | -----      | -----      | -----       | 420        |            |            |       |
| rnd-6_family-7426-LTR-ERV1  | -----      | -----      | -----      | -----       | 1692       |            |            |       |
| Esox_lucius                 | -----      | -----      | -----      | -----       | 532        |            |            |       |
| Salmo_salar                 | -----      | -----      | -----      | -----       | 801        |            |            |       |
| Didelphidae                 | -----      | -----      | -----      | -----       | 642        |            |            |       |
| Latimeria_chalumnae         | -----      | -----      | -----      | -----       | 1766       |            |            |       |
| Monodelphis_domestica       | -----      | -----      | -----      | -----       | 543        |            |            |       |
| Macropus_eugenii            | -----      | -----      | -----      | -----       | 509        |            |            |       |
| Alligator_mississippiensis  | -----      | -----      | -----      | -----       | 566        |            |            |       |
| Chrysemys_picta_bellii      | -----      | -----      | -----      | -----       | 3578       |            |            |       |
| Danio_rerio                 | -----      | -----      | -----      | -----       | 699        |            |            |       |
| Taeniopygia                 | -----      | -----      | -----      | -----       | 538        |            |            |       |
| Dasybus_novemcinctus        | -----      | -----      | -----      | -----       | 512        |            |            |       |
| LTR_XT                      | -----      | -----      | -----      | -----       | 503        |            |            |       |
| Haplorrhini                 | -----      | -----      | -----      | -----       | 8801       |            |            |       |
| Catarrhini                  | -----      | -----      | -----      | -----       | 7847       |            |            |       |
| Anolis_carolinensis         | -----      | -----      | -----      | -----       | 1184       |            |            |       |
| Murine_leukemia_virus       | -----      | -----      | -----      | -----       | 7615       |            |            |       |
| Phascolarctos_cinereus      | -----      | -----      | -----      | -----       | 7426       |            |            |       |
| Estrildidae                 | -----      | -----      | -----      | -----       | 482        |            |            |       |
| Xenopus_Silurana_tropicalis | -----      | -----      | -----      | -----       | 812        |            |            |       |
| L_XT                        | -----      | -----      | -----      | -----       | 7509       |            |            |       |
| Takifugu_rubripes           | -----      | -----      | -----      | -----       | 707        |            |            |       |
| Bos_taurus                  | -----      | -----      | -----      | -----       | 533        |            |            |       |
| Homo_sapiens                | -----      | -----      | -----      | -----       | 450        |            |            |       |
| Microcebus_murinus          | -----      | -----      | -----      | -----       | 428        |            |            |       |
| Myotis_lucifugus            | -----      | -----      | -----      | -----       | 432        |            |            |       |
| Equus_caballus              | -----      | -----      | -----      | -----       | 450        |            |            |       |
| Tupaia_belangeri            | -----      | -----      | -----      | -----       | 498        |            |            |       |
| Loxodonta_africana          | -----      | -----      | -----      | -----       | 460        |            |            |       |
| Murinae                     | -----      | -----      | -----      | -----       | 489        |            |            |       |
| Canis_lupus_familiaris      | -----      | -----      | -----      | -----       | 536        |            |            |       |
| Sus_scrofa                  | -----      | -----      | -----      | -----       | 454        |            |            |       |
| Choloepus_hoffmanni         | -----      | -----      | -----      | -----       | 444        |            |            |       |
| Vicugna_pacos               | -----      | -----      | -----      | -----       | 474        |            |            |       |
| Gavialis_gangeticus         | -----      | -----      | -----      | -----       | 470        |            |            |       |
| Mammalia                    | -----      | -----      | -----      | -----       | 1337       |            |            |       |
| Passeroidea                 | -----      | -----      | -----      | -----       | 641        |            |            |       |
| Takifugu                    | -----      | -----      | -----      | -----       | 629        |            |            |       |
| Pteropus_vampyrus           | -----      | -----      | -----      | -----       | 472        |            |            |       |
| Ornithorhynchus             | -----      | -----      | -----      | -----       | 2785       |            |            |       |
| Oryctolagus_cuniculus       | -----      | -----      | -----      | -----       | 494        |            |            |       |
| Gallus_gallus               | -----      | -----      | -----      | -----       | 508        |            |            |       |
| Hominidae                   | ACCNACNCAN | CANCAGGCCA | CTTGACTGN  | NNCNNNNNNC  | TCNCCAACCA | ANCNGNAACT | CTNNNNATCA | 5492  |
| Metatheria                  | -----      | -----      | -----      | -----       | -----      | -----      | -----      | 569   |
| Rodentia                    | TACNCCATCG | TCTCAAGATA | ATCCTCTTNN | TNNANNNAAAC | NCNNNNNGNA | NNNNGCTCTC | TTAAGTNTCN | 3083  |
| Monodelphis                 | -----      | -----      | -----      | -----       | -----      | -----      | -----      | 857   |
| Consensus                   | -----      | -----      | -----      | -----       | -----      | -----      | -----      | ----- |
| Conservation                | 100%       | -----      |            |             |            |            |            | 0%    |



|                             | 9,260      | 9,280      | 9,300      |      |
|-----------------------------|------------|------------|------------|------|
| Dipodomys_ordii             |            |            |            | 597  |
| Laurasiatheria              |            |            |            | 361  |
| Eutheria                    |            |            |            | 452  |
| Tarsius_syrichta            |            |            |            | 487  |
| Muridae                     | GATTATGTTT | GGAAGACCTC | CCCCTGCTT  | 3628 |
| Gasterosteus_aculeatus      |            |            |            | 2399 |
| Felis_silvestris            |            |            |            | 505  |
| Rattus                      |            |            |            | 589  |
| Papio_hamadryas             | TCATCTTGCC | TCTTTTCCCC | CTCCTACAAC | 6595 |
| Pan_troglodytes             |            |            |            | 4138 |
| Ailuropoda_melanoleuca      |            |            |            | 462  |
| Cavia_porcellus             |            |            |            | 527  |
| Ictidomys_tridecemlineatus  |            |            |            | 530  |
| Canis                       |            |            |            | 479  |
| Felis_catus                 |            |            |            | 423  |
| Ochotona_princeps           |            |            |            | 515  |
| Cercopithecidae             |            |            |            | 2243 |
| Carnivora                   |            |            |            | 421  |
| Mus                         |            |            |            | 2488 |
| Mus_musculus                |            |            |            | 478  |
| Rattus_norvegicus           |            |            |            | 420  |
| Tursiops_truncatus          |            |            |            | 518  |
| Procavia_capensis           |            |            |            | 442  |
| Primates                    |            |            |            | 671  |
| Echinops_telfairi           |            |            |            | 473  |
| Sorex_araneus               |            |            |            | 494  |
| Canidae                     |            |            |            | 550  |
| Otolemur_garnettii          |            |            |            | 413  |
| Gallus                      |            |            |            | 633  |
| Callithrix_jacchus          |            |            |            | 495  |
| Crocodylus_porosus          |            |            |            | 527  |
| Erinaceus_europaeus         |            |            |            | 420  |
| rnd-6_family-7426-LTR-ERV1  |            |            |            | 1692 |
| Esox_lucius                 |            |            |            | 532  |
| Salmo_salar                 |            |            |            | 801  |
| Didelphidae                 |            |            |            | 642  |
| Latimeria_chalumnae         |            |            |            | 1766 |
| Monodelphis_domestica       |            |            |            | 543  |
| Macropus_eugenii            |            |            |            | 509  |
| Alligator_mississippiensis  |            |            |            | 566  |
| Chrysemys_picta_bellii      |            |            |            | 3578 |
| Danio_rerio                 |            |            |            | 699  |
| Taeniopygia                 |            |            |            | 538  |
| Dasybus_novemcinctus        |            |            |            | 512  |
| LTR_XT                      |            |            |            | 503  |
| Haplorrhini                 |            |            |            | 8801 |
| Catarrhini                  |            |            |            | 7847 |
| Anolis_carolinensis         |            |            |            | 1184 |
| Murine_leukemia_virus       |            |            |            | 7615 |
| Phascolarctos_cinereus      |            |            |            | 7426 |
| Estrildidae                 |            |            |            | 482  |
| Xenopus_Silurana_tropicalis |            |            |            | 812  |
| L_XT                        |            |            |            | 7509 |
| Takifugu_rubripes           |            |            |            | 707  |
| Bos_taurus                  |            |            |            | 533  |
| Homo_sapiens                |            |            |            | 450  |
| Microcebus_murinus          |            |            |            | 428  |
| Myotis_lucifugus            |            |            |            | 432  |
| Equus_caballus              |            |            |            | 450  |
| Tupaia_belangeri            |            |            |            | 498  |
| Loxodonta_africana          |            |            |            | 460  |
| Murinae                     |            |            |            | 489  |
| Canis_lupus_familiaris      |            |            |            | 536  |
| Sus_scrofa                  |            |            |            | 454  |
| Choloepus_hoffmanni         |            |            |            | 444  |
| Vicugna_pacos               |            |            |            | 474  |
| Gavialis_gangeticus         |            |            |            | 470  |
| Mammalia                    |            |            |            | 1337 |
| Passeroidea                 |            |            |            | 641  |
| Takifugu                    |            |            |            | 629  |
| Pteropus_vampyrus           |            |            |            | 472  |
| Ornithorhynchus             |            |            |            | 2785 |
| Oryctolagus_cuniculus       |            |            |            | 494  |
| Gallus_gallus               |            |            |            | 508  |
| Hominidae                   | NNNANNGCAN | NNANNNTCCN | CNNANAGNC  | 5562 |
| Metatheria                  |            |            |            | 569  |
| Rodentia                    | GNAGANACNN | AGGTNGACNN | NNTNGANNNN | 3152 |
| Monodelphis                 |            |            |            | 857  |
| Consensus                   |            |            |            |      |
| Conservation                | 100%       |            |            | 0%   |

|                             | 9,320      | 9,340      | 9,360      | 9,380      |            |             |            |       |
|-----------------------------|------------|------------|------------|------------|------------|-------------|------------|-------|
| Dipodomys_ordii             | -----      | -----      | -----      | -----      | 597        |             |            |       |
| Laurasiatheria              | -----      | -----      | -----      | -----      | 361        |             |            |       |
| Eutheria                    | -----      | -----      | -----      | -----      | 452        |             |            |       |
| Tarsius_syrichta            | -----      | -----      | -----      | -----      | 487        |             |            |       |
| Muridae                     | ATTCCTTCT  | CAAGTCACTA | CAGGCCCTCC | AGTCCTCCAT | AAAGGCTATT | CATTGGACTA  | TCTGAGAGAC | 3698  |
| Gasterosteus_aculeatus      | -----      | -----      | -----      | -----      | 2399       |             |            |       |
| Felis_silvestris            | -----      | -----      | -----      | -----      | 505        |             |            |       |
| Rattus                      | -----      | -----      | -----      | -----      | 589        |             |            |       |
| Papio_hamadryas             | ACTGTACCTC | CATAACCAAT | GTCACCGGTC | CCATATGCGC | TGTAATGGT  | TCGGTCTTTC  | TCTGTGGCAA | 6665  |
| Pan_troglodytes             | -----      | -----      | -----      | -----      | 4138       |             |            |       |
| Ailuropoda_melanoleuca      | -----      | -----      | -----      | -----      | 462        |             |            |       |
| Cavia_porcellus             | -----      | -----      | -----      | -----      | 527        |             |            |       |
| Ictidomys_tridecemlineatus  | -----      | -----      | -----      | -----      | 530        |             |            |       |
| Canis                       | -----      | -----      | -----      | -----      | 479        |             |            |       |
| Felis_catus                 | -----      | -----      | -----      | -----      | 423        |             |            |       |
| Ochotona_princeps           | -----      | -----      | -----      | -----      | 515        |             |            |       |
| Cercopithecidae             | -----      | -----      | -----      | -----      | 2243       |             |            |       |
| Carnivora                   | -----      | -----      | -----      | -----      | 421        |             |            |       |
| Mus                         | -----      | -----      | -----      | -----      | 2488       |             |            |       |
| Mus_musculus                | -----      | -----      | -----      | -----      | 478        |             |            |       |
| Rattus_norvegicus           | -----      | -----      | -----      | -----      | 420        |             |            |       |
| Tursiops_truncatus          | -----      | -----      | -----      | -----      | 518        |             |            |       |
| Procavia_capensis           | -----      | -----      | -----      | -----      | 442        |             |            |       |
| Primates                    | -----      | -----      | -----      | -----      | 671        |             |            |       |
| Echinops_telfairi           | -----      | -----      | -----      | -----      | 473        |             |            |       |
| Sorex_araneus               | -----      | -----      | -----      | -----      | 494        |             |            |       |
| Canidae                     | -----      | -----      | -----      | -----      | 550        |             |            |       |
| Otolemur_garnettii          | -----      | -----      | -----      | -----      | 413        |             |            |       |
| Gallus                      | -----      | -----      | -----      | -----      | 633        |             |            |       |
| Callithrix_jacchus          | -----      | -----      | -----      | -----      | 495        |             |            |       |
| Crocodylus_porosus          | -----      | -----      | -----      | -----      | 527        |             |            |       |
| Erinaceus_europaeus         | -----      | -----      | -----      | -----      | 420        |             |            |       |
| rnd-6_family-7426-LTR-ERV1  | -----      | -----      | -----      | -----      | 1692       |             |            |       |
| Esox_lucius                 | -----      | -----      | -----      | -----      | 532        |             |            |       |
| Salmo_salar                 | -----      | -----      | -----      | -----      | 801        |             |            |       |
| Didelphidae                 | -----      | -----      | -----      | -----      | 642        |             |            |       |
| Latimeria_chalumnae         | -----      | -----      | -----      | -----      | 1766       |             |            |       |
| Monodelphis_domestica       | -----      | -----      | -----      | -----      | 543        |             |            |       |
| Macropus_eugenii            | -----      | -----      | -----      | -----      | 509        |             |            |       |
| Alligator_mississippiensis  | -----      | -----      | -----      | -----      | 566        |             |            |       |
| Chrysemys_picta_bellii      | -----      | -----      | -----      | -----      | 3578       |             |            |       |
| Danio_rerio                 | -----      | -----      | -----      | -----      | 699        |             |            |       |
| Taeniopygia                 | -----      | -----      | -----      | -----      | 538        |             |            |       |
| Dasybus_novemcinctus        | -----      | -----      | -----      | -----      | 512        |             |            |       |
| LTR_XT                      | -----      | -----      | -----      | -----      | 503        |             |            |       |
| Haplorrhini                 | -----      | -----      | -----      | -----      | 8801       |             |            |       |
| Catarrhini                  | -----      | -----      | -----      | -----      | 7847       |             |            |       |
| Anolis_carolinensis         | -----      | -----      | -----      | -----      | 1184       |             |            |       |
| Murine_leukemia_virus       | -----      | -----      | -----      | -----      | 7615       |             |            |       |
| Phascolarctos_cinereus      | -----      | -----      | -----      | -----      | 7426       |             |            |       |
| Estrildidae                 | -----      | -----      | -----      | -----      | 482        |             |            |       |
| Xenopus_Silurana_tropicalis | -----      | -----      | -----      | -----      | 812        |             |            |       |
| L_XT                        | -----      | -----      | -----      | -----      | 7509       |             |            |       |
| Takifugu_rubripes           | -----      | -----      | -----      | -----      | 707        |             |            |       |
| Bos_taurus                  | -----      | -----      | -----      | -----      | 533        |             |            |       |
| Homo_sapiens                | -----      | -----      | -----      | -----      | 450        |             |            |       |
| Microcebus_murinus          | -----      | -----      | -----      | -----      | 428        |             |            |       |
| Myotis_lucifugus            | -----      | -----      | -----      | -----      | 432        |             |            |       |
| Equus_caballus              | -----      | -----      | -----      | -----      | 450        |             |            |       |
| Tupaia_belangeri            | -----      | -----      | -----      | -----      | 498        |             |            |       |
| Loxodonta_africana          | -----      | -----      | -----      | -----      | 460        |             |            |       |
| Murinae                     | -----      | -----      | -----      | -----      | 489        |             |            |       |
| Canis_lupus_familiaris      | -----      | -----      | -----      | -----      | 536        |             |            |       |
| Sus_scrofa                  | -----      | -----      | -----      | -----      | 454        |             |            |       |
| Choloepus_hoffmanni         | -----      | -----      | -----      | -----      | 444        |             |            |       |
| Vicugna_pacos               | -----      | -----      | -----      | -----      | 474        |             |            |       |
| Gavialis_gangeticus         | -----      | -----      | -----      | -----      | 470        |             |            |       |
| Mammalia                    | -----      | -----      | -----      | -----      | 1337       |             |            |       |
| Passeroidea                 | -----      | -----      | -----      | -----      | 641        |             |            |       |
| Takifugu                    | -----      | -----      | -----      | -----      | 629        |             |            |       |
| Pteropus_vampyrus           | -----      | -----      | -----      | -----      | 472        |             |            |       |
| Ornithorhynchus             | -----      | -----      | -----      | -----      | 2785       |             |            |       |
| Oryctolagus_cuniculus       | -----      | -----      | -----      | -----      | 494        |             |            |       |
| Gallus_gallus               | -----      | -----      | -----      | -----      | 508        |             |            |       |
| Hominidae                   | ANNCCCNANN | NTNNCNAANA | NCNNNCNCNN | NNCTGAANNN | CNGTTGTCTT | ATATAGACGA  | ACNGNTGTGG | 5632  |
| Metatheria                  | -----      | -----      | -----      | -----      | -----      | -----       | -----      | 569   |
| Rodentia                    | AGNNNCTANN | TACNTTNNCT | TNNGCTNNCT | NTNGCNCGCC | NNNANCAGCN | NTNNNNNTNNN | CNNNTNNNNN | 3222  |
| Monodelphis                 | -----      | -----      | -----      | -----      | -----      | -----       | -----      | 857   |
| Consensus                   | -----      | -----      | -----      | -----      | -----      | -----       | -----      | ----- |
| Conservation                | 100%       | -----      | -----      | -----      | -----      | -----       | -----      | 0%    |

|                             | 9,400      | 9,420      | 9,440      |              |            |            |            |      |
|-----------------------------|------------|------------|------------|--------------|------------|------------|------------|------|
| Dipodomys_ordii             |            |            |            | 597          |            |            |            |      |
| Laurasiatheria              |            |            |            | 361          |            |            |            |      |
| Eutheria                    |            |            |            | 452          |            |            |            |      |
| Tarsius_syrichta            |            |            |            | 487          |            |            |            |      |
| Muridae                     | CCAGCCGACC | TCCGAGTCCA | CCACCAGTTT | CCCCTTGTTT   | GAGTCCAGTG | ATACTGTCTG | GGTCAAGCAG | 3768 |
| Gasterosteus_aculeatus      |            |            |            |              |            |            |            | 2399 |
| Felis_silvestris            |            |            |            |              |            |            |            | 505  |
| Rattus                      |            |            |            |              |            |            |            | 589  |
| Papio_hamadryas             | TAACATGGCA | TACACTTATC | TACCCACGAA | CTGGACGGGG   | CTTTGCGTCC | TAGCAACTCT | CCTCCCCGAC | 6735 |
| Pan_troglodytes             |            |            |            |              |            |            |            | 4138 |
| Ailuropoda_melanoleuca      |            |            |            |              |            |            |            | 462  |
| Cavia_porcellus             |            |            |            |              |            |            |            | 527  |
| Ictidomys_tridecemlineatus  |            |            |            |              |            |            |            | 530  |
| Canis                       |            |            |            |              |            |            |            | 479  |
| Felis_catus                 |            |            |            |              |            |            |            | 423  |
| Ochotona_princeps           |            |            |            |              |            |            |            | 515  |
| Cercopithecidae             |            |            |            |              |            |            |            | 2243 |
| Carnivora                   |            |            |            |              |            |            |            | 421  |
| Mus                         |            |            |            |              |            |            |            | 2488 |
| Mus_musculus                |            |            |            |              |            |            |            | 478  |
| Rattus_norvegicus           |            |            |            |              |            |            |            | 420  |
| Tursiops_truncatus          |            |            |            |              |            |            |            | 518  |
| Procavia_capensis           |            |            |            |              |            |            |            | 442  |
| Primates                    |            |            |            |              |            |            |            | 671  |
| Echinops_telfairi           |            |            |            |              |            |            |            | 473  |
| Sorex_araneus               |            |            |            |              |            |            |            | 494  |
| Canidae                     |            |            |            |              |            |            |            | 550  |
| Otolemur_garnettii          |            |            |            |              |            |            |            | 413  |
| Gallus                      |            |            |            |              |            |            |            | 633  |
| Callithrix_jacchus          |            |            |            |              |            |            |            | 495  |
| Crocodylus_porosus          |            |            |            |              |            |            |            | 527  |
| Erinaceus_europaeus         |            |            |            |              |            |            |            | 420  |
| rnd-6_family-7426-LTR-ERV1  |            |            |            |              |            |            |            | 1692 |
| Esox_lucius                 |            |            |            |              |            |            |            | 532  |
| Salmo_salar                 |            |            |            |              |            |            |            | 801  |
| Didelphidae                 |            |            |            |              |            |            |            | 642  |
| Latimeria_chalumnae         |            |            |            |              |            |            |            | 1766 |
| Monodelphis_domestica       |            |            |            |              |            |            |            | 543  |
| Macropus_eugenii            |            |            |            |              |            |            |            | 509  |
| Alligator_mississippiensis  |            |            |            |              |            |            |            | 566  |
| Chrysemys_picta_bellii      |            |            |            |              |            |            |            | 3578 |
| Danio_rerio                 |            |            |            |              |            |            |            | 699  |
| Taeniopygia                 |            |            |            |              |            |            |            | 538  |
| Dasyopus_novemcinctus       |            |            |            |              |            |            |            | 512  |
| LTR_XT                      |            |            |            |              |            |            |            | 503  |
| Haplorrhini                 |            |            |            |              |            |            |            | 8801 |
| Catarrhini                  |            |            |            |              |            |            |            | 7847 |
| Anolis_carolinensis         |            |            |            |              |            |            |            | 1184 |
| Murine_leukemia_virus       |            |            |            |              |            |            |            | 7615 |
| Phascolarctos_cinereus      |            |            |            |              |            |            |            | 7426 |
| Estrildidae                 |            |            |            |              |            |            |            | 482  |
| Xenopus_Silurana_tropicalis |            |            |            |              |            |            |            | 812  |
| L_XT                        |            |            |            |              |            |            |            | 7509 |
| Takifugu_rubripes           |            |            |            |              |            |            |            | 707  |
| Bos_taurus                  |            |            |            |              |            |            |            | 533  |
| Homo_sapiens                |            |            |            |              |            |            |            | 450  |
| Microcebus_murinus          |            |            |            |              |            |            |            | 428  |
| Myotis_lucifugus            |            |            |            |              |            |            |            | 432  |
| Equus_caballus              |            |            |            |              |            |            |            | 450  |
| Tupaia_belangeri            |            |            |            |              |            |            |            | 498  |
| Loxodonta_africana          |            |            |            |              |            |            |            | 460  |
| Murinae                     |            |            |            |              |            |            |            | 489  |
| Canis_lupus_familiaris      |            |            |            |              |            |            |            | 536  |
| Sus_scrofa                  |            |            |            |              |            |            |            | 454  |
| Choloepus_hoffmanni         |            |            |            |              |            |            |            | 444  |
| Vicugna_pacos               |            |            |            |              |            |            |            | 474  |
| Gavialis_gangeticus         |            |            |            |              |            |            |            | 470  |
| Mammalia                    |            |            |            |              |            |            |            | 1337 |
| Passeroidea                 |            |            |            |              |            |            |            | 641  |
| Takifugu                    |            |            |            |              |            |            |            | 629  |
| Pteropus_vampyrus           |            |            |            |              |            |            |            | 472  |
| Ornithorhynchus             |            |            |            |              |            |            |            | 2785 |
| Oryctolagus_cuniculus       |            |            |            |              |            |            |            | 494  |
| Gallus_gallus               |            |            |            |              |            |            |            | 508  |
| Hominidae                   | CAAGGCTCCC | TCCAGANNTT | NNACCNNCAT | G- - - ANNNT | NGNNNNNNNN | GNNNNGTCAC | NNNTCTNNNC | 5698 |
| Metatheria                  |            |            |            |              |            |            |            | 569  |
| Rodentia                    | TNTGANNTTC | AGNANACCTN | TNNNNAATNG | NTNAANCNNN   | NNNNNCATNT | NNTNNNTNNG | NAGACNNCTN | 3292 |
| Monodelphis                 |            |            |            |              |            |            |            | 857  |
| Consensus                   |            |            |            |              |            |            |            |      |
| Conservation                | 100%       |            |            |              |            |            |            | 0%   |

|                             | 9,460      | 9,480      | 9,500      | 9,520      |            |            |            |      |
|-----------------------------|------------|------------|------------|------------|------------|------------|------------|------|
| Dipodomys_ordii             | -----      | -----      | -----      | -----      | 597        |            |            |      |
| Laurasiatheria              | -----      | -----      | -----      | -----      | 361        |            |            |      |
| Eutheria                    | -----      | -----      | -----      | -----      | 452        |            |            |      |
| Tarsius_syrichta            | -----      | -----      | -----      | -----      | 487        |            |            |      |
| Muridae                     | GTAGCCAAAG | GGGCGCTGGA | ACCAACTTGG | AAAGGACCCT | ACACGGTGAT | TCTCTCCACT | CCTACGGCTG | 3838 |
| Gasterosteus_aculeatus      | -----      | -----      | -----      | -----      | 2399       |            |            |      |
| Felis_silvestris            | -----      | -----      | -----      | -----      | 505        |            |            |      |
| Rattus                      | -----      | -----      | -----      | -----      | 589        |            |            |      |
| Papio_hamadryas             | ATTGACATCA | TTCCCGGAGA | TGAACCGGTC | CCCATCCCTG | CTATTGATCA | TTTTATATAT | AGACCTAAAC | 6805 |
| Pan_troglodytes             | -----      | -----      | -----      | -----      | 4138       |            |            |      |
| Ailuropoda_melanoleuca      | -----      | -----      | -----      | -----      | 462        |            |            |      |
| Cavia_porcellus             | -----      | -----      | -----      | -----      | 527        |            |            |      |
| Ictidomys_tridecemlineatus  | -----      | -----      | -----      | -----      | 530        |            |            |      |
| Canis                       | -----      | -----      | -----      | -----      | 479        |            |            |      |
| Felis_catus                 | -----      | -----      | -----      | -----      | 423        |            |            |      |
| Ochotona_princeps           | -----      | -----      | -----      | -----      | 515        |            |            |      |
| Cercopithecidae             | -----      | -----      | -----      | -----      | 2243       |            |            |      |
| Carnivora                   | -----      | -----      | -----      | -----      | 421        |            |            |      |
| Mus                         | -----      | -----      | -----      | -----      | 2488       |            |            |      |
| Mus_musculus                | -----      | -----      | -----      | -----      | 478        |            |            |      |
| Rattus_norvegicus           | -----      | -----      | -----      | -----      | 420        |            |            |      |
| Tursiops_truncatus          | -----      | -----      | -----      | -----      | 518        |            |            |      |
| Procavia_capensis           | -----      | -----      | -----      | -----      | 442        |            |            |      |
| Primates                    | -----      | -----      | -----      | -----      | 671        |            |            |      |
| Echinops_telfairi           | -----      | -----      | -----      | -----      | 473        |            |            |      |
| Sorex_araneus               | -----      | -----      | -----      | -----      | 494        |            |            |      |
| Canidae                     | -----      | -----      | -----      | -----      | 550        |            |            |      |
| Otolemur_garnettii          | -----      | -----      | -----      | -----      | 413        |            |            |      |
| Gallus                      | -----      | -----      | -----      | -----      | 633        |            |            |      |
| Callithrix_jacchus          | -----      | -----      | -----      | -----      | 495        |            |            |      |
| Crocodylus_porosus          | -----      | -----      | -----      | -----      | 527        |            |            |      |
| Erinaceus_europaeus         | -----      | -----      | -----      | -----      | 420        |            |            |      |
| rnd-6_family-7426-LTR-ERV1  | -----      | -----      | -----      | -----      | 1692       |            |            |      |
| Esox_lucius                 | -----      | -----      | -----      | -----      | 532        |            |            |      |
| Salmo_salar                 | -----      | -----      | -----      | -----      | 801        |            |            |      |
| Didelphidae                 | -----      | -----      | -----      | -----      | 642        |            |            |      |
| Latimeria_chalumnae         | -----      | -----      | -----      | -----      | 1766       |            |            |      |
| Monodelphis_domestica       | -----      | -----      | -----      | -----      | 543        |            |            |      |
| Macropus_eugenii            | -----      | -----      | -----      | -----      | 509        |            |            |      |
| Alligator_mississippiensis  | -----      | -----      | -----      | -----      | 566        |            |            |      |
| Chrysemys_picta_bellii      | -----      | -----      | -----      | -----      | 3578       |            |            |      |
| Danio_rerio                 | -----      | -----      | -----      | -----      | 699        |            |            |      |
| Taeniopygia                 | -----      | -----      | -----      | -----      | 538        |            |            |      |
| Dasybus_novemcinctus        | -----      | -----      | -----      | -----      | 512        |            |            |      |
| LTR_XT                      | -----      | -----      | -----      | -----      | 503        |            |            |      |
| Haplorrhini                 | -----      | -----      | -----      | -----      | 8801       |            |            |      |
| Catarrhini                  | -----      | -----      | -----      | -----      | 7847       |            |            |      |
| Anolis_carolinensis         | -----      | -----      | -----      | -----      | 1184       |            |            |      |
| Murine_leukemia_virus       | -----      | -----      | -----      | -----      | 7615       |            |            |      |
| Phascolarctos_cinereus      | -----      | -----      | -----      | -----      | 7426       |            |            |      |
| Estrildidae                 | -----      | -----      | -----      | -----      | 482        |            |            |      |
| Xenopus_Silurana_tropicalis | -----      | -----      | -----      | -----      | 812        |            |            |      |
| L_XT                        | -----      | -----      | -----      | -----      | 7509       |            |            |      |
| Takifugu_rubripes           | -----      | -----      | -----      | -----      | 707        |            |            |      |
| Bos_taurus                  | -----      | -----      | -----      | -----      | 533        |            |            |      |
| Homo_sapiens                | -----      | -----      | -----      | -----      | 450        |            |            |      |
| Microcebus_murinus          | -----      | -----      | -----      | -----      | 428        |            |            |      |
| Myotis_lucifugus            | -----      | -----      | -----      | -----      | 432        |            |            |      |
| Equus_caballus              | -----      | -----      | -----      | -----      | 450        |            |            |      |
| Tupaia_belangeri            | -----      | -----      | -----      | -----      | 498        |            |            |      |
| Loxodonta_africana          | -----      | -----      | -----      | -----      | 460        |            |            |      |
| Murinae                     | -----      | -----      | -----      | -----      | 489        |            |            |      |
| Canis_lupus_familiaris      | -----      | -----      | -----      | -----      | 536        |            |            |      |
| Sus_scrofa                  | -----      | -----      | -----      | -----      | 454        |            |            |      |
| Choloepus_hoffmanni         | -----      | -----      | -----      | -----      | 444        |            |            |      |
| Vicugna_pacos               | -----      | -----      | -----      | -----      | 474        |            |            |      |
| Gavialis_gangeticus         | -----      | -----      | -----      | -----      | 470        |            |            |      |
| Mammalia                    | -----      | -----      | -----      | -----      | 1337       |            |            |      |
| Passeroidea                 | -----      | -----      | -----      | -----      | 641        |            |            |      |
| Takifugu                    | -----      | -----      | -----      | -----      | 629        |            |            |      |
| Pteropus_vampyrus           | -----      | -----      | -----      | -----      | 472        |            |            |      |
| Ornithorhynchus             | -----      | -----      | -----      | -----      | 2785       |            |            |      |
| Oryctolagus_cuniculus       | -----      | -----      | -----      | -----      | 494        |            |            |      |
| Gallus_gallus               | -----      | -----      | -----      | -----      | 508        |            |            |      |
| Hominidae                   | TNNCACACNN | GNNNNNGTNG | ACNNNCNNCC | TCNCNGNNNN | CNNNNCNNNG | NNNNTTTTNN | CNTCACTGAG | 5768 |
| Metatheria                  | -----      | -----      | -----      | -----      | -----      | -----      | -----      | 569  |
| Rodentia                    | NCNNNCANNN | NNCCAAAAGN | NNANANTNNN | NNCNGATANC | ANCTANNNCN | NNTNNNAAN  | CNNCNNNCAN | 3362 |
| Monodelphis                 | -----      | -----      | -----      | -----      | -----      | -----      | -----      | 857  |
| Consensus                   | -----      | -----      | -----      | -----      | -----      | -----      | -----      |      |
| Conservation                | 100%<br>0% |            |            |            |            |            |            |      |

|                             | 9,540      | 9,560      | 9,580      |            |            |             |            |      |  |
|-----------------------------|------------|------------|------------|------------|------------|-------------|------------|------|--|
| Dipodomys_ordii             |            |            |            | 597        |            |             |            |      |  |
| Laurasiatheria              |            |            |            | 361        |            |             |            |      |  |
| Eutheria                    |            |            |            | 452        |            |             |            |      |  |
| Tarsius_syrichta            |            |            |            | 487        |            |             |            |      |  |
| Muridae                     | TGAAGGTAGC | TGGCATTACA | CCATGGATCC | ACCACACCCA | GGTCAAGAAA | GCAGAAGCCA  | CAGATGCCGC | 3908 |  |
| Gasterosteus_aculeatus      |            |            |            | 2399       |            |             |            |      |  |
| Felis_silvestris            |            |            |            | 505        |            |             |            |      |  |
| Rattus                      |            |            |            | 589        |            |             |            |      |  |
| Papio_hamadryas             | GGGCCATACA | GTTTATTCTT | TTACTAGCAG | GGCTAGGGAT | CACCGCAGCC | TTCAACAACAG | GAGCTACAGG | 6875 |  |
| Pan_troglodytes             |            |            |            | 4138       |            |             |            |      |  |
| Ailuropoda_melanoleuca      |            |            |            | 462        |            |             |            |      |  |
| Cavia_porcellus             |            |            |            | 527        |            |             |            |      |  |
| Ictidomys_tridecemlineatus  |            |            |            | 530        |            |             |            |      |  |
| Canis                       |            |            |            | 479        |            |             |            |      |  |
| Felis_catus                 |            |            |            | 423        |            |             |            |      |  |
| Ochotona_princeps           |            |            |            | 515        |            |             |            |      |  |
| Cercopithecidae             |            |            |            | 2243       |            |             |            |      |  |
| Carnivora                   |            |            |            | 421        |            |             |            |      |  |
| Mus                         |            |            |            | 2488       |            |             |            |      |  |
| Mus_musculus                |            |            |            | 478        |            |             |            |      |  |
| Rattus_norvegicus           |            |            |            | 420        |            |             |            |      |  |
| Tursiops_truncatus          |            |            |            | 518        |            |             |            |      |  |
| Procavia_capensis           |            |            |            | 442        |            |             |            |      |  |
| Primates                    |            |            |            | 671        |            |             |            |      |  |
| Echinops_telfairi           |            |            |            | 473        |            |             |            |      |  |
| Sorex_araneus               |            |            |            | 494        |            |             |            |      |  |
| Canidae                     |            |            |            | 550        |            |             |            |      |  |
| Otolemur_garnettii          |            |            |            | 413        |            |             |            |      |  |
| Gallus                      |            |            |            | 633        |            |             |            |      |  |
| Callithrix_jacchus          |            |            |            | 495        |            |             |            |      |  |
| Crocodylus_porosus          |            |            |            | 527        |            |             |            |      |  |
| Erinaceus_europaeus         |            |            |            | 420        |            |             |            |      |  |
| rnd-6_family-7426-LTR-ERV1  |            |            |            | 1692       |            |             |            |      |  |
| Esox_lucius                 |            |            |            | 532        |            |             |            |      |  |
| Salmo_salar                 |            |            |            | 801        |            |             |            |      |  |
| Didelphidae                 |            |            |            | 642        |            |             |            |      |  |
| Latimeria_chalumnae         |            |            |            | 1766       |            |             |            |      |  |
| Monodelphis_domestica       |            |            |            | 543        |            |             |            |      |  |
| Macropus_eugenii            |            |            |            | 509        |            |             |            |      |  |
| Alligator_mississippiensis  |            |            |            | 566        |            |             |            |      |  |
| Chrysemys_picta_bellii      |            |            |            | 3578       |            |             |            |      |  |
| Danio_rerio                 |            |            |            | 699        |            |             |            |      |  |
| Taeniopygia                 |            |            |            | 538        |            |             |            |      |  |
| Dasybus_novemcinctus        |            |            |            | 512        |            |             |            |      |  |
| LTR_XT                      |            |            |            | 503        |            |             |            |      |  |
| Haplorrhini                 |            |            |            | 8801       |            |             |            |      |  |
| Catarrhini                  |            |            |            | 7847       |            |             |            |      |  |
| Anolis_carolinensis         |            |            |            | 1184       |            |             |            |      |  |
| Murine_leukemia_virus       |            |            |            | 7615       |            |             |            |      |  |
| Phascolarctos_cinereus      |            |            |            | 7426       |            |             |            |      |  |
| Estrildidae                 |            |            |            | 482        |            |             |            |      |  |
| Xenopus_Silurana_tropicalis |            |            |            | 812        |            |             |            |      |  |
| L_XT                        |            |            |            | 7509       |            |             |            |      |  |
| Takifugu_rubripes           |            |            |            | 707        |            |             |            |      |  |
| Bos_taurus                  |            |            |            | 533        |            |             |            |      |  |
| Homo_sapiens                |            |            |            | 450        |            |             |            |      |  |
| Microcebus_murinus          |            |            |            | 428        |            |             |            |      |  |
| Myotis_lucifugus            |            |            |            | 432        |            |             |            |      |  |
| Equus_caballus              |            |            |            | 450        |            |             |            |      |  |
| Tupaia_belangeri            |            |            |            | 498        |            |             |            |      |  |
| Loxodonta_africana          |            |            |            | 460        |            |             |            |      |  |
| Murinae                     |            |            |            | 489        |            |             |            |      |  |
| Canis_lupus_familiaris      |            |            |            | 536        |            |             |            |      |  |
| Sus_scrofa                  |            |            |            | 454        |            |             |            |      |  |
| Choloepus_hoffmanni         |            |            |            | 444        |            |             |            |      |  |
| Vicugna_pacos               |            |            |            | 474        |            |             |            |      |  |
| Gavialis_gangeticus         |            |            |            | 470        |            |             |            |      |  |
| Mammalia                    |            |            |            | 1337       |            |             |            |      |  |
| Passeroidea                 |            |            |            | 641        |            |             |            |      |  |
| Takifugu                    |            |            |            | 629        |            |             |            |      |  |
| Pteropus_vampyrus           |            |            |            | 472        |            |             |            |      |  |
| Ornithorhynchus             |            |            |            | 2785       |            |             |            |      |  |
| Oryctolagus_cuniculus       |            |            |            | 494        |            |             |            |      |  |
| Gallus_gallus               |            |            |            | 508        |            |             |            |      |  |
| Hominidae                   | AATTGGAGTN | CNNANANGN  | NNTCTNCTCN | NGNCTNGTNG | CNANNNCANC | ATNNNCNNNN  | NCNNNGTNNC | 5838 |  |
| Metatheria                  |            |            |            |            |            |             |            | 569  |  |
| Rodentia                    | CNTNNNNNTN | CNNCTCTNT  | GATNNANCNA | NNNATNNNTN | TTNANGTTGN | CNNGAGANTT  | ATGNAGGCTG | 3432 |  |
| Monodelphis                 |            |            |            |            |            |             |            | 857  |  |
| Consensus                   |            |            |            |            |            |             |            |      |  |
| Conservation                | 100%<br>0% |            |            |            |            |             |            |      |  |

|                             | 9,600      | 9,620      | 9,640      | 9,660      |            |             |            |       |
|-----------------------------|------------|------------|------------|------------|------------|-------------|------------|-------|
| Dipodomys_ordii             | -----      | -----      | -----      | -----      | 597        |             |            |       |
| Laurasiatheria              | -----      | -----      | -----      | -----      | 361        |             |            |       |
| Eutheria                    | -----      | -----      | -----      | -----      | 452        |             |            |       |
| Tarsius_syrichta            | -----      | -----      | -----      | -----      | 487        |             |            |       |
| Muridae                     | TGCCAAATGG | ACTGTCTCTG | GACTATGGAC | CCATTGAAAT | TAAGGTTTCA | TTGGTCCCCA  | GGCCCTTCCA | 3978  |
| Gasterosteus_aculeatus      | -----      | -----      | -----      | -----      | 2399       |             |            |       |
| Felis_silvestris            | -----      | -----      | -----      | -----      | 505        |             |            |       |
| Rattus                      | -----      | -----      | -----      | -----      | 589        |             |            |       |
| Papio_hamadryas             | CCTAGGTGTC | TCTGTGACCC | AATATACAAA | ATTATCTAAT | CAGCTAATT  | CTGATGTACA  | AATCTTATCT | 6945  |
| Pan_troglodytes             | -----      | -----      | -----      | -----      | 4138       |             |            |       |
| Ailuropoda_melanoleuca      | -----      | -----      | -----      | -----      | 462        |             |            |       |
| Cavia_porcellus             | -----      | -----      | -----      | -----      | 527        |             |            |       |
| Ictidomys_tridecemlineatus  | -----      | -----      | -----      | -----      | 530        |             |            |       |
| Canis                       | -----      | -----      | -----      | -----      | 479        |             |            |       |
| Felis_catus                 | -----      | -----      | -----      | -----      | 423        |             |            |       |
| Ochotona_princeps           | -----      | -----      | -----      | -----      | 515        |             |            |       |
| Cercopithecidae             | -----      | -----      | -----      | -----      | 2243       |             |            |       |
| Carnivora                   | -----      | -----      | -----      | -----      | 421        |             |            |       |
| Mus                         | -----      | -----      | -----      | -----      | 2488       |             |            |       |
| Mus_musculus                | -----      | -----      | -----      | -----      | 478        |             |            |       |
| Rattus_norvegicus           | -----      | -----      | -----      | -----      | 420        |             |            |       |
| Tursiops_truncatus          | -----      | -----      | -----      | -----      | 518        |             |            |       |
| Procavia_capensis           | -----      | -----      | -----      | -----      | 442        |             |            |       |
| Primates                    | -----      | -----      | -----      | -----      | 671        |             |            |       |
| Echinops_telfairi           | -----      | -----      | -----      | -----      | 473        |             |            |       |
| Sorex_araneus               | -----      | -----      | -----      | -----      | 494        |             |            |       |
| Canidae                     | -----      | -----      | -----      | -----      | 550        |             |            |       |
| Otolemur_garnettii          | -----      | -----      | -----      | -----      | 413        |             |            |       |
| Gallus                      | -----      | -----      | -----      | -----      | 633        |             |            |       |
| Callithrix_jacchus          | -----      | -----      | -----      | -----      | 495        |             |            |       |
| Crocodylus_porosus          | -----      | -----      | -----      | -----      | 527        |             |            |       |
| Erinaceus_europaeus         | -----      | -----      | -----      | -----      | 420        |             |            |       |
| rnd-6_family-7426-LTR-ERV1  | -----      | -----      | -----      | -----      | 1692       |             |            |       |
| Esox_lucius                 | -----      | -----      | -----      | -----      | 532        |             |            |       |
| Salmo_salar                 | -----      | -----      | -----      | -----      | 801        |             |            |       |
| Didelphidae                 | -----      | -----      | -----      | -----      | 642        |             |            |       |
| Latimeria_chalumnae         | -----      | -----      | -----      | -----      | 1766       |             |            |       |
| Monodelphis_domestica       | -----      | -----      | -----      | -----      | 543        |             |            |       |
| Macropus_eugenii            | -----      | -----      | -----      | -----      | 509        |             |            |       |
| Alligator_mississippiensis  | -----      | -----      | -----      | -----      | 566        |             |            |       |
| Chrysemys_picta_bellii      | -----      | -----      | -----      | -----      | 3578       |             |            |       |
| Danio_rerio                 | -----      | -----      | -----      | -----      | 699        |             |            |       |
| Taeniopygia                 | -----      | -----      | -----      | -----      | 538        |             |            |       |
| Dasybus_novemcinctus        | -----      | -----      | -----      | -----      | 512        |             |            |       |
| LTR_XT                      | -----      | -----      | -----      | -----      | 503        |             |            |       |
| Haplorrhini                 | -----      | -----      | -----      | -----      | 8801       |             |            |       |
| Catarrhini                  | -----      | -----      | -----      | -----      | 7847       |             |            |       |
| Anolis_carolinensis         | -----      | -----      | -----      | -----      | 1184       |             |            |       |
| Murine_leukemia_virus       | -----      | -----      | -----      | -----      | 7615       |             |            |       |
| Phascolarctos_cinereus      | -----      | -----      | -----      | -----      | 7426       |             |            |       |
| Estrildidae                 | -----      | -----      | -----      | -----      | 482        |             |            |       |
| Xenopus_Silurana_tropicalis | -----      | -----      | -----      | -----      | 812        |             |            |       |
| L_XT                        | -----      | -----      | -----      | -----      | 7509       |             |            |       |
| Takifugu_rubripes           | -----      | -----      | -----      | -----      | 707        |             |            |       |
| Bos_taurus                  | -----      | -----      | -----      | -----      | 533        |             |            |       |
| Homo_sapiens                | -----      | -----      | -----      | -----      | 450        |             |            |       |
| Microcebus_murinus          | -----      | -----      | -----      | -----      | 428        |             |            |       |
| Myotis_lucifugus            | -----      | -----      | -----      | -----      | 432        |             |            |       |
| Equus_caballus              | -----      | -----      | -----      | -----      | 450        |             |            |       |
| Tupaia_belangeri            | -----      | -----      | -----      | -----      | 498        |             |            |       |
| Loxodonta_africana          | -----      | -----      | -----      | -----      | 460        |             |            |       |
| Murinae                     | -----      | -----      | -----      | -----      | 489        |             |            |       |
| Canis_lupus_familiaris      | -----      | -----      | -----      | -----      | 536        |             |            |       |
| Sus_scrofa                  | -----      | -----      | -----      | -----      | 454        |             |            |       |
| Choloepus_hoffmanni         | -----      | -----      | -----      | -----      | 444        |             |            |       |
| Vicugna_pacos               | -----      | -----      | -----      | -----      | 474        |             |            |       |
| Gavialis_gangeticus         | -----      | -----      | -----      | -----      | 470        |             |            |       |
| Mammalia                    | -----      | -----      | -----      | -----      | 1337       |             |            |       |
| Passeroidea                 | -----      | -----      | -----      | -----      | 641        |             |            |       |
| Takifugu                    | -----      | -----      | -----      | -----      | 629        |             |            |       |
| Pteropus_vampyrus           | -----      | -----      | -----      | -----      | 472        |             |            |       |
| Ornithorhynchus             | -----      | -----      | -----      | -----      | 2785       |             |            |       |
| Oryctolagus_cuniculus       | -----      | -----      | -----      | -----      | 494        |             |            |       |
| Gallus_gallus               | -----      | -----      | -----      | -----      | 508        |             |            |       |
| Hominidae                   | ANNCACNCAN | NNNNTNCCNN | GNTCTAAAAT | TCTNTTNNNN | NGNCNCNNNN | NGANNANNCC  | CTGCACTNTG | 5908  |
| Metatheria                  | -----      | -----      | -----      | -----      | -----      | -----       | -----      | 569   |
| Rodentia                    | CCNTTNTTNG | TNCTGTANNA | NANATNANGC | AANTTCANGA | ANNNGCTTCN | ACNTTNNAAAN | NNNGAATNNG | 3502  |
| Monodelphis                 | -----      | -----      | -----      | -----      | -----      | -----       | -----      | 857   |
| Consensus                   | -----      | -----      | -----      | -----      | -----      | -----       | -----      | ----- |
| Conservation                | 100%<br>0% |            |            |            |            |             |            |       |

|                             | 9,680       | 9,700      | 9,720      |      |
|-----------------------------|-------------|------------|------------|------|
| Dipodomys_ordii             |             |            |            | 597  |
| Laurasiatheria              |             |            |            | 361  |
| Eutheria                    |             |            |            | 452  |
| Tarsius_syrichta            |             |            |            | 487  |
| Muridae                     | CTCCCTGCCC  | CTCTACCTCC | TCCTGAGTCT | 4048 |
| Gasterosteus_aculeatus      |             |            |            | 2399 |
| Felis_silvestris            |             |            |            | 505  |
| Rattus                      |             |            |            | 589  |
| Papio_hamadryas             | AGCACCATAC  | AAGATCTGCA | AGATCAAGTA | 7015 |
| Pan_troglodytes             |             |            |            | 4138 |
| Ailuropoda_melanoleuca      |             |            |            | 462  |
| Cavia_porcellus             |             |            |            | 527  |
| Ictidomys_tridecemlineatus  |             |            |            | 530  |
| Canis                       |             |            |            | 479  |
| Felis_catus                 |             |            |            | 423  |
| Ochotona_princeps           |             |            |            | 515  |
| Cercopithecidae             |             |            |            | 2243 |
| Carnivora                   |             |            |            | 421  |
| Mus                         |             |            |            | 2488 |
| Mus_musculus                |             |            |            | 478  |
| Rattus_norvegicus           |             |            |            | 420  |
| Tursiops_truncatus          |             |            |            | 518  |
| Procavia_capensis           |             |            |            | 442  |
| Primates                    |             |            |            | 671  |
| Echinops_telfairi           |             |            |            | 473  |
| Sorex_araneus               |             |            |            | 494  |
| Canidae                     |             |            |            | 550  |
| Otolemur_garnettii          |             |            |            | 413  |
| Gallus                      |             |            |            | 633  |
| Callithrix_jacchus          |             |            |            | 495  |
| Crocodylus_porosus          |             |            |            | 527  |
| Erinaceus_europaeus         |             |            |            | 420  |
| rnd-6_family-7426-LTR-ERV1  |             |            |            | 1692 |
| Esox_lucius                 |             |            |            | 532  |
| Salmo_salar                 |             |            |            | 801  |
| Didelphidae                 |             |            |            | 642  |
| Latimeria_chalumnae         |             |            |            | 1766 |
| Monodelphis_domestica       |             |            |            | 543  |
| Macropus_eugenii            |             |            |            | 509  |
| Alligator_mississippiensis  |             |            |            | 566  |
| Chrysemys_picta_bellii      |             |            |            | 3578 |
| Danio_rerio                 |             |            |            | 699  |
| Taeniopygia                 |             |            |            | 538  |
| Dasybus_novemcinctus        |             |            |            | 512  |
| LTR_XT                      |             |            |            | 503  |
| Haplorrhini                 |             |            |            | 8801 |
| Catarrhini                  |             |            |            | 7847 |
| Anolis_carolinensis         |             |            |            | 1184 |
| Murine_leukemia_virus       |             |            |            | 7615 |
| Phascolarctos_cinereus      |             |            |            | 7426 |
| Estrildidae                 |             |            |            | 482  |
| Xenopus_Silurana_tropicalis |             |            |            | 812  |
| L_XT                        |             |            |            | 7509 |
| Takifugu_rubripes           |             |            |            | 707  |
| Bos_taurus                  |             |            |            | 533  |
| Homo_sapiens                |             |            |            | 450  |
| Microcebus_murinus          |             |            |            | 428  |
| Myotis_lucifugus            |             |            |            | 432  |
| Equus_caballus              |             |            |            | 450  |
| Tupaia_belangeri            |             |            |            | 498  |
| Loxodonta_africana          |             |            |            | 460  |
| Murinae                     |             |            |            | 489  |
| Canis_lupus_familiaris      |             |            |            | 536  |
| Sus_scrofa                  |             |            |            | 454  |
| Choloepus_hoffmanni         |             |            |            | 444  |
| Vicugna_pacos               |             |            |            | 474  |
| Gavialis_gangeticus         |             |            |            | 470  |
| Mammalia                    |             |            |            | 1337 |
| Passeroidea                 |             |            |            | 641  |
| Takifugu                    |             |            |            | 629  |
| Pteropus_vampyrus           |             |            |            | 472  |
| Ornithorhynchus             |             |            |            | 2785 |
| Oryctolagus_cuniculus       |             |            |            | 494  |
| Gallus_gallus               |             |            |            | 508  |
| Hominidae                   | CNTNNTGTNN  | NATNNANGTN | ACNCCAANNN | 5977 |
| Metatheria                  |             |            |            | 569  |
| Rodentia                    | GGNTNANNNTA | NATNNNNNTT | NNNGNNCCAT | 3572 |
| Monodelphis                 |             |            |            | 857  |
| Consensus                   |             |            |            |      |
| Conservation                | 100%        |            |            | 0%   |

|                             | 9,740               | 9,760      | 9,780      | 9,800      |            |            |            |      |  |
|-----------------------------|---------------------|------------|------------|------------|------------|------------|------------|------|--|
| Dipodomys_ordii             | -----               | -----      | -----      | -----      | 597        |            |            |      |  |
| Laurasiatheria              | -----               | -----      | -----      | -----      | 361        |            |            |      |  |
| Eutheria                    | -----               | -----      | -----      | -----      | 452        |            |            |      |  |
| Tarsius_syrichta            | -----               | -----      | -----      | -----      | 487        |            |            |      |  |
| Muridae                     | NGCCCTCAGG          | CCTGGACCTG | GAAACTGAAG | AAGACAGATA | CAGGGAAGGT | ATTAGCTAGC | GTGACTACAG | 4118 |  |
| Gasterosteus_aculeatus      | -----               | -----      | -----      | -----      | 2399       |            |            |      |  |
| Felis_silvestris            | -----               | -----      | -----      | -----      | 505        |            |            |      |  |
| Rattus                      | -----               | -----      | -----      | -----      | 589        |            |            |      |  |
| Papio_hamadryas             | TAGATCTACT          | TACAGCAGAA | CAAGGAGGAA | TCTGTTTAGC | CCTGCAAGAA | AAATGCTGCT | TTTATGTTAA | 7085 |  |
| Pan_troglodytes             | -----               | -----      | -----      | -----      | 4138       |            |            |      |  |
| Ailuropoda_melanoleuca      | -----               | -----      | -----      | -----      | 462        |            |            |      |  |
| Cavia_porcellus             | -----               | -----      | -----      | -----      | 527        |            |            |      |  |
| Ictidomys_tridecemlineatus  | -----               | -----      | -----      | -----      | 530        |            |            |      |  |
| Canis                       | -----               | -----      | -----      | -----      | 479        |            |            |      |  |
| Felis_catus                 | -----               | -----      | -----      | -----      | 423        |            |            |      |  |
| Ochotona_princeps           | -----               | -----      | -----      | -----      | 515        |            |            |      |  |
| Cercopithecidae             | -----               | -----      | -----      | -----      | 2243       |            |            |      |  |
| Carnivora                   | -----               | -----      | -----      | -----      | 421        |            |            |      |  |
| Mus                         | -----               | -----      | -----      | -----      | 2488       |            |            |      |  |
| Mus_musculus                | -----               | -----      | -----      | -----      | 478        |            |            |      |  |
| Rattus_norvegicus           | -----               | -----      | -----      | -----      | 420        |            |            |      |  |
| Tursiops_truncatus          | -----               | -----      | -----      | -----      | 518        |            |            |      |  |
| Procavia_capensis           | -----               | -----      | -----      | -----      | 442        |            |            |      |  |
| Primates                    | -----               | -----      | -----      | -----      | 671        |            |            |      |  |
| Echinops_telfairi           | -----               | -----      | -----      | -----      | 473        |            |            |      |  |
| Sorex_araneus               | -----               | -----      | -----      | -----      | 494        |            |            |      |  |
| Canidae                     | -----               | -----      | -----      | -----      | 550        |            |            |      |  |
| Otolemur_garnettii          | -----               | -----      | -----      | -----      | 413        |            |            |      |  |
| Gallus                      | -----               | -----      | -----      | -----      | 633        |            |            |      |  |
| Callithrix_jacchus          | -----               | -----      | -----      | -----      | 495        |            |            |      |  |
| Crocodylus_porosus          | -----               | -----      | -----      | -----      | 527        |            |            |      |  |
| Erinaceus_europaeus         | -----               | -----      | -----      | -----      | 420        |            |            |      |  |
| rnd-6_family-7426-LTR-ERV1  | -----               | -----      | -----      | -----      | 1692       |            |            |      |  |
| Esox_lucius                 | -----               | -----      | -----      | -----      | 532        |            |            |      |  |
| Salmo_salar                 | -----               | -----      | -----      | -----      | 801        |            |            |      |  |
| Didelphidae                 | -----               | -----      | -----      | -----      | 642        |            |            |      |  |
| Latimeria_chalumnae         | -----               | -----      | -----      | -----      | 1766       |            |            |      |  |
| Monodelphis_domestica       | -----               | -----      | -----      | -----      | 543        |            |            |      |  |
| Macropus_eugenii            | -----               | -----      | -----      | -----      | 509        |            |            |      |  |
| Alligator_mississippiensis  | -----               | -----      | -----      | -----      | 566        |            |            |      |  |
| Chrysemys_picta_bellii      | -----               | -----      | -----      | -----      | 3578       |            |            |      |  |
| Danio_rerio                 | -----               | -----      | -----      | -----      | 699        |            |            |      |  |
| Taeniopygia                 | -----               | -----      | -----      | -----      | 538        |            |            |      |  |
| Dasybus_novemcinctus        | -----               | -----      | -----      | -----      | 512        |            |            |      |  |
| LTR_XT                      | -----               | -----      | -----      | -----      | 503        |            |            |      |  |
| Haplorrhini                 | -----               | -----      | -----      | -----      | 8801       |            |            |      |  |
| Catarrhini                  | -----               | -----      | -----      | -----      | 7847       |            |            |      |  |
| Anolis_carolinensis         | -----               | -----      | -----      | -----      | 1184       |            |            |      |  |
| Murine_leukemia_virus       | -----               | -----      | -----      | -----      | 7615       |            |            |      |  |
| Phascolarctos_cinereus      | -----               | -----      | -----      | -----      | 7426       |            |            |      |  |
| Estrildidae                 | -----               | -----      | -----      | -----      | 482        |            |            |      |  |
| Xenopus_Silurana_tropicalis | -----               | -----      | -----      | -----      | 812        |            |            |      |  |
| L_XT                        | -----               | -----      | -----      | -----      | 7509       |            |            |      |  |
| Takifugu_rubripes           | -----               | -----      | -----      | -----      | 707        |            |            |      |  |
| Bos_taurus                  | -----               | -----      | -----      | -----      | 533        |            |            |      |  |
| Homo_sapiens                | -----               | -----      | -----      | -----      | 450        |            |            |      |  |
| Microcebus_murinus          | -----               | -----      | -----      | -----      | 428        |            |            |      |  |
| Myotis_lucifugus            | -----               | -----      | -----      | -----      | 432        |            |            |      |  |
| Equus_caballus              | -----               | -----      | -----      | -----      | 450        |            |            |      |  |
| Tupaia_belangeri            | -----               | -----      | -----      | -----      | 498        |            |            |      |  |
| Loxodonta_africana          | -----               | -----      | -----      | -----      | 460        |            |            |      |  |
| Murinae                     | -----               | -----      | -----      | -----      | 489        |            |            |      |  |
| Canis_lupus_familiaris      | -----               | -----      | -----      | -----      | 536        |            |            |      |  |
| Sus_scrofa                  | -----               | -----      | -----      | -----      | 454        |            |            |      |  |
| Choloepus_hoffmanni         | -----               | -----      | -----      | -----      | 444        |            |            |      |  |
| Vicugna_pacos               | -----               | -----      | -----      | -----      | 474        |            |            |      |  |
| Gavialis_gangeticus         | -----               | -----      | -----      | -----      | 470        |            |            |      |  |
| Mammalia                    | -----               | -----      | -----      | -----      | 1337       |            |            |      |  |
| Passeroidea                 | -----               | -----      | -----      | -----      | 641        |            |            |      |  |
| Takifugu                    | -----               | -----      | -----      | -----      | 629        |            |            |      |  |
| Pteropus_vampyrus           | -----               | -----      | -----      | -----      | 472        |            |            |      |  |
| Ornithorhynchus             | -----               | -----      | -----      | -----      | 2785       |            |            |      |  |
| Oryctolagus_cuniculus       | -----               | -----      | -----      | -----      | 494        |            |            |      |  |
| Gallus_gallus               | -----               | -----      | -----      | -----      | 508        |            |            |      |  |
| Hominidae                   | GCACTGNNNN          | AATANNNATG | NNNNNNNAAN | TNNNNNNNNN | ANNNNNNCNG | -ACCCANNGN | NNTNTGTCNN | 6046 |  |
| Metatheria                  | -----               | -----      | -----      | -----      | -----      | -----      | -----      | 569  |  |
| Rodentia                    | NTNNNNNNNN          | NATNANAGCN | GNNNNTNNNG | CNNNNNCAAA | ATACAGAGGG | TACACATCCC | ATTCTCTCAA | 3642 |  |
| Monodelphis                 | -----               | -----      | -----      | -----      | -----      | -----      | -----      | 857  |  |
| Consensus                   | -----               | -----      | -----      | -----      | -----      | -----      | -----      |      |  |
| Conservation                | 100%<br>-----<br>0% |            |            |            |            |            |            |      |  |



|                             | 9,820      | 9,840      | 9,860      |            |            |            |            |      |
|-----------------------------|------------|------------|------------|------------|------------|------------|------------|------|
| Dipodomys_ordii             | -----      | -----      | -----      | 597        |            |            |            |      |
| Laurasiatheria              | -----      | -----      | -----      | 361        |            |            |            |      |
| Eutheria                    | -----      | -----      | -----      | 452        |            |            |            |      |
| Tarsius_syrichta            | -----      | -----      | -----      | 487        |            |            |            |      |
| Muridae                     | ACCAGCAACC | CATATTCATC | TTGACCTTTG | CTCACTGATG | CCCACITTA  | GTGTCTGGTT | GTATTGGAGA | 4188 |
| Gasterosteus_aculeatus      | -----      | -----      | -----      | 2399       |            |            |            |      |
| Felis_silvestris            | -----      | -----      | -----      | 505        |            |            |            |      |
| Rattus                      | -----      | -----      | -----      | 589        |            |            |            |      |
| Papio_hamadryas             | CAAGTCAGGG | ATTGTGAGAG | ACAAAATAAA | AACCTTACAA | GAAGAAGTAG | AAAGACGTAG | AAAAGATCTA | 7155 |
| Pan_troglodytes             | -----      | -----      | -----      | 4138       |            |            |            |      |
| Ailuropoda_melanoleuca      | -----      | -----      | -----      | 462        |            |            |            |      |
| Cavia_porcellus             | -----      | -----      | -----      | 527        |            |            |            |      |
| Ictidomys_tridecemlineatus  | -----      | -----      | -----      | 530        |            |            |            |      |
| Canis                       | -----      | -----      | -----      | 479        |            |            |            |      |
| Felis_catus                 | -----      | -----      | -----      | 423        |            |            |            |      |
| Ochotona_princeps           | -----      | -----      | -----      | 515        |            |            |            |      |
| Cercopithecidae             | -----      | -----      | -----      | 2243       |            |            |            |      |
| Carnivora                   | -----      | -----      | -----      | 421        |            |            |            |      |
| Mus                         | -----      | -----      | -----      | 2488       |            |            |            |      |
| Mus_musculus                | -----      | -----      | -----      | 478        |            |            |            |      |
| Rattus_norvegicus           | -----      | -----      | -----      | 420        |            |            |            |      |
| Tursiops_truncatus          | -----      | -----      | -----      | 518        |            |            |            |      |
| Procavia_capensis           | -----      | -----      | -----      | 442        |            |            |            |      |
| Primates                    | -----      | -----      | -----      | 671        |            |            |            |      |
| Echinops_telfairi           | -----      | -----      | -----      | 473        |            |            |            |      |
| Sorex_araneus               | -----      | -----      | -----      | 494        |            |            |            |      |
| Canidae                     | -----      | -----      | -----      | 550        |            |            |            |      |
| Otolemur_garnettii          | -----      | -----      | -----      | 413        |            |            |            |      |
| Gallus                      | -----      | -----      | -----      | 633        |            |            |            |      |
| Callithrix_jacchus          | -----      | -----      | -----      | 495        |            |            |            |      |
| Crocodylus_porosus          | -----      | -----      | -----      | 527        |            |            |            |      |
| Erinaceus_europaeus         | -----      | -----      | -----      | 420        |            |            |            |      |
| rnd-6_family-7426-LTR-ERV1  | -----      | -----      | -----      | 1692       |            |            |            |      |
| Esox_lucius                 | -----      | -----      | -----      | 532        |            |            |            |      |
| Salmo_salar                 | -----      | -----      | -----      | 801        |            |            |            |      |
| Didelphidae                 | -----      | -----      | -----      | 642        |            |            |            |      |
| Latimeria_chalumnae         | -----      | -----      | -----      | 1766       |            |            |            |      |
| Monodelphis_domestica       | -----      | -----      | -----      | 543        |            |            |            |      |
| Macropus_eugenii            | -----      | -----      | -----      | 509        |            |            |            |      |
| Alligator_mississippiensis  | -----      | -----      | -----      | 566        |            |            |            |      |
| Chrysemys_picta_bellii      | -----      | -----      | -----      | 3578       |            |            |            |      |
| Danio_rerio                 | -----      | -----      | -----      | 699        |            |            |            |      |
| Taeniopygia                 | -----      | -----      | -----      | 538        |            |            |            |      |
| Dasybus_novemcinctus        | -----      | -----      | -----      | 512        |            |            |            |      |
| LTR_XT                      | -----      | -----      | -----      | 503        |            |            |            |      |
| Haplorrhini                 | -----      | -----      | -----      | 8801       |            |            |            |      |
| Catarrhini                  | -----      | -----      | -----      | 7847       |            |            |            |      |
| Anolis_carolinensis         | -----      | -----      | -----      | 1184       |            |            |            |      |
| Murine_leukemia_virus       | -----      | -----      | -----      | 7615       |            |            |            |      |
| Phascolarctos_cinereus      | -----      | -----      | -----      | 7426       |            |            |            |      |
| Estrildidae                 | -----      | -----      | -----      | 482        |            |            |            |      |
| Xenopus_Silurana_tropicalis | -----      | -----      | -----      | 812        |            |            |            |      |
| L_XT                        | -----      | -----      | -----      | 7509       |            |            |            |      |
| Takifugu_rubripes           | -----      | -----      | -----      | 707        |            |            |            |      |
| Bos_taurus                  | -----      | -----      | -----      | 533        |            |            |            |      |
| Homo_sapiens                | -----      | -----      | -----      | 450        |            |            |            |      |
| Microcebus_murinus          | -----      | -----      | -----      | 428        |            |            |            |      |
| Myotis_lucifugus            | -----      | -----      | -----      | 432        |            |            |            |      |
| Equus_caballus              | -----      | -----      | -----      | 450        |            |            |            |      |
| Tupaia_belangeri            | -----      | -----      | -----      | 498        |            |            |            |      |
| Loxodonta_africana          | -----      | -----      | -----      | 460        |            |            |            |      |
| Murinae                     | -----      | -----      | -----      | 489        |            |            |            |      |
| Canis_lupus_familiaris      | -----      | -----      | -----      | 536        |            |            |            |      |
| Sus_scrofa                  | -----      | -----      | -----      | 454        |            |            |            |      |
| Choloepus_hoffmanni         | -----      | -----      | -----      | 444        |            |            |            |      |
| Vicugna_pacos               | -----      | -----      | -----      | 474        |            |            |            |      |
| Gavialis_gangeticus         | -----      | -----      | -----      | 470        |            |            |            |      |
| Mammalia                    | -----      | -----      | -----      | 1337       |            |            |            |      |
| Passeroidea                 | -----      | -----      | -----      | 641        |            |            |            |      |
| Takifugu                    | -----      | -----      | -----      | 629        |            |            |            |      |
| Pteropus_vampyrus           | -----      | -----      | -----      | 472        |            |            |            |      |
| Ornithorhynchus             | -----      | -----      | -----      | 2785       |            |            |            |      |
| Oryctolagus_cuniculus       | -----      | -----      | -----      | 494        |            |            |            |      |
| Gallus_gallus               | -----      | -----      | -----      | 508        |            |            |            |      |
| Hominidae                   | TNNNTCNNNN | GNNNNACNGG | NCGCTNTAN  | CGGATTTNCC | CNNCANNNN  | CTNNCCNNTN | GGACCCCGC  | 6116 |
| Metatheria                  | -----      | -----      | -----      | 569        |            |            |            |      |
| Rodentia                    | CCCCTAGGTA | TAGACACGGT | AGAAGAAGTG | GTCCAACGCT | CCTCAAAGGT | CCTTACATCC | CTAACATCAC | 3712 |
| Monodelphis                 | -----      | -----      | -----      | 857        |            |            |            |      |
| Consensus                   | -----      | -----      | -----      | -----      |            |            |            |      |
| Conservation                | 100%       | -----      | -----      | -----      |            |            |            |      |
|                             | 0%         | -----      | -----      | -----      |            |            |            |      |

|                             | 9,880      | 9,900      | 9,920      | 9,940      |            |            |            |       |
|-----------------------------|------------|------------|------------|------------|------------|------------|------------|-------|
| Dipodomys_ordii             | -----      | -----      | -----      | -----      | 597        |            |            |       |
| Laurasiatheria              | -----      | -----      | -----      | -----      | 361        |            |            |       |
| Eutheria                    | -----      | -----      | -----      | -----      | 452        |            |            |       |
| Tarsius_syrichta            | -----      | -----      | -----      | -----      | 487        |            |            |       |
| Muridae                     | AAGGAAAGAT | GTGGGAATTT | ATCTTTTGAG | ATAGGAATAC | AGAGTTTACA | ATTCTATGCA | TGCCCTGCAG | 4258  |
| Gasterosteus_aculeatus      | -----      | -----      | -----      | -----      | 2399       |            |            |       |
| Felis_silvestris            | -----      | -----      | -----      | -----      | 505        |            |            |       |
| Rattus                      | -----      | -----      | -----      | -----      | 589        |            |            |       |
| Papio_hamadryas             | GCTTCCAACC | CACTTTGGAC | TGGGCTTCAA | GGGCTCCTCC | CTTACCTCCT | GCCCTTTCTT | GGCCCTCTAC | 7225  |
| Pan_troglodytes             | -----      | -----      | -----      | -----      | 4138       |            |            |       |
| Ailuropoda_melanoleuca      | -----      | -----      | -----      | -----      | 462        |            |            |       |
| Cavia_porcellus             | -----      | -----      | -----      | -----      | 527        |            |            |       |
| Ictidomys_tridecemlineatus  | -----      | -----      | -----      | -----      | 530        |            |            |       |
| Canis                       | -----      | -----      | -----      | -----      | 479        |            |            |       |
| Felis_catus                 | -----      | -----      | -----      | -----      | 423        |            |            |       |
| Ochotona_princeps           | -----      | -----      | -----      | -----      | 515        |            |            |       |
| Cercopithecidae             | -----      | -----      | -----      | -----      | 2243       |            |            |       |
| Carnivora                   | -----      | -----      | -----      | -----      | 421        |            |            |       |
| Mus                         | -----      | -----      | -----      | -----      | 2488       |            |            |       |
| Mus_musculus                | -----      | -----      | -----      | -----      | 478        |            |            |       |
| Rattus_norvegicus           | -----      | -----      | -----      | -----      | 420        |            |            |       |
| Tursiops_truncatus          | -----      | -----      | -----      | -----      | 518        |            |            |       |
| Procavia_capensis           | -----      | -----      | -----      | -----      | 442        |            |            |       |
| Primates                    | -----      | -----      | -----      | -----      | 671        |            |            |       |
| Echinops_telfairi           | -----      | -----      | -----      | -----      | 473        |            |            |       |
| Sorex_araneus               | -----      | -----      | -----      | -----      | 494        |            |            |       |
| Canidae                     | -----      | -----      | -----      | -----      | 550        |            |            |       |
| Otolemur_garnettii          | -----      | -----      | -----      | -----      | 413        |            |            |       |
| Gallus                      | -----      | -----      | -----      | -----      | 633        |            |            |       |
| Callithrix_jacchus          | -----      | -----      | -----      | -----      | 495        |            |            |       |
| Crocodylus_porosus          | -----      | -----      | -----      | -----      | 527        |            |            |       |
| Erinaceus_europaeus         | -----      | -----      | -----      | -----      | 420        |            |            |       |
| rnd-6_family-7426-LTR-ERV1  | -----      | -----      | -----      | -----      | 1692       |            |            |       |
| Esox_lucius                 | -----      | -----      | -----      | -----      | 532        |            |            |       |
| Salmo_salar                 | -----      | -----      | -----      | -----      | 801        |            |            |       |
| Didelphidae                 | -----      | -----      | -----      | -----      | 642        |            |            |       |
| Latimeria_chalumnae         | -----      | -----      | -----      | -----      | 1766       |            |            |       |
| Monodelphis_domestica       | -----      | -----      | -----      | -----      | 543        |            |            |       |
| Macropus_eugenii            | -----      | -----      | -----      | -----      | 509        |            |            |       |
| Alligator_mississippiensis  | -----      | -----      | -----      | -----      | 566        |            |            |       |
| Chrysemys_picta_bellii      | -----      | -----      | -----      | -----      | 3578       |            |            |       |
| Danio_rerio                 | -----      | -----      | -----      | -----      | 699        |            |            |       |
| Taeniopygia                 | -----      | -----      | -----      | -----      | 538        |            |            |       |
| Dasybus_novemcinctus        | -----      | -----      | -----      | -----      | 512        |            |            |       |
| LTR_XT                      | -----      | -----      | -----      | -----      | 503        |            |            |       |
| Haplorrhini                 | -----      | -----      | -----      | -----      | 8801       |            |            |       |
| Catarrhini                  | -----      | -----      | -----      | -----      | 7847       |            |            |       |
| Anolis_carolinensis         | -----      | -----      | -----      | -----      | 1184       |            |            |       |
| Murine_leukemia_virus       | -----      | -----      | -----      | -----      | 7615       |            |            |       |
| Phascolarctos_cinereus      | -----      | -----      | -----      | -----      | 7426       |            |            |       |
| Estrildidae                 | -----      | -----      | -----      | -----      | 482        |            |            |       |
| Xenopus_Silurana_tropicalis | -----      | -----      | -----      | -----      | 812        |            |            |       |
| L_XT                        | -----      | -----      | -----      | -----      | 7509       |            |            |       |
| Takifugu_rubripes           | -----      | -----      | -----      | -----      | 707        |            |            |       |
| Bos_taurus                  | -----      | -----      | -----      | -----      | 533        |            |            |       |
| Homo_sapiens                | -----      | -----      | -----      | -----      | 450        |            |            |       |
| Microcebus_murinus          | -----      | -----      | -----      | -----      | 428        |            |            |       |
| Myotis_lucifugus            | -----      | -----      | -----      | -----      | 432        |            |            |       |
| Equus_caballus              | -----      | -----      | -----      | -----      | 450        |            |            |       |
| Tupaia_belangeri            | -----      | -----      | -----      | -----      | 498        |            |            |       |
| Loxodonta_africana          | -----      | -----      | -----      | -----      | 460        |            |            |       |
| Murinae                     | -----      | -----      | -----      | -----      | 489        |            |            |       |
| Canis_lupus_familiaris      | -----      | -----      | -----      | -----      | 536        |            |            |       |
| Sus_scrofa                  | -----      | -----      | -----      | -----      | 454        |            |            |       |
| Choloepus_hoffmanni         | -----      | -----      | -----      | -----      | 444        |            |            |       |
| Vicugna_pacos               | -----      | -----      | -----      | -----      | 474        |            |            |       |
| Gavialis_gangeticus         | -----      | -----      | -----      | -----      | 470        |            |            |       |
| Mammalia                    | -----      | -----      | -----      | -----      | 1337       |            |            |       |
| Passeroidea                 | -----      | -----      | -----      | -----      | 641        |            |            |       |
| Takifugu                    | -----      | -----      | -----      | -----      | 629        |            |            |       |
| Pteropus_vampyrus           | -----      | -----      | -----      | -----      | 472        |            |            |       |
| Ornithorhynchus             | -----      | -----      | -----      | -----      | 2785       |            |            |       |
| Oryctolagus_cuniculus       | -----      | -----      | -----      | -----      | 494        |            |            |       |
| Gallus_gallus               | -----      | -----      | -----      | -----      | 508        |            |            |       |
| Hominidae                   | NNNNCNNCNG | NTNTNNTGN  | NNNACTATAN | GAGNNNNNNN | CNNNNNTNTN | TCNANTNNNN | ANGANCNNCA | 6186  |
| Metatheria                  | -----      | -----      | -----      | -----      | -----      | -----      | -----      | 569   |
| Rodentia                    | CCCTTTTAGA | CGATACCGAT | CTCCCTGTCA | TACCATCTCT | TGTTTCAGAC | CTTAACCTCT | GCATATCAGC | 3782  |
| Monodelphis                 | -----      | -----      | -----      | -----      | -----      | -----      | -----      | 857   |
| Consensus                   | -----      | -----      | -----      | -----      | -----      | -----      | -----      | ----- |
| Conservation                | 100%<br>0% |            |            |            |            |            |            |       |

|                             | 9,960      | 9,980      | 10,000     |            |            |            |            |      |  |
|-----------------------------|------------|------------|------------|------------|------------|------------|------------|------|--|
| Dipodomys_ordii             |            |            |            | 597        |            |            |            |      |  |
| Laurasiatheria              |            |            |            | 361        |            |            |            |      |  |
| Eutheria                    |            |            |            | 452        |            |            |            |      |  |
| Tarsius_syrichta            |            |            |            | 487        |            |            |            |      |  |
| Muridae                     | CTGGGCCCTG | GTTGCCAGAA | ACAAGGGAGT | TTCCATTGCA | AAAACCTGGG | TTGTAAAAC  | GAGGCTTCCT | 4328 |  |
| Gasterosteus_aculeatus      |            |            |            | 2399       |            |            |            |      |  |
| Felis_silvestris            |            |            |            | 505        |            |            |            |      |  |
| Rattus                      |            |            |            | 589        |            |            |            |      |  |
| Papio_hamadryas             | TTACCCTCCT | GCTCTTACTC | ACCATTGGGC | CGTGCATTTT | TAACCGTCTA | ACCGCTTTTA | TTAATGATAA | 7295 |  |
| Pan_troglodytes             |            |            |            | 4138       |            |            |            |      |  |
| Ailuropoda_melanoleuca      |            |            |            | 462        |            |            |            |      |  |
| Cavia_porcellus             |            |            |            | 527        |            |            |            |      |  |
| Ictidomys_tridecemlineatus  |            |            |            | 530        |            |            |            |      |  |
| Canis                       |            |            |            | 479        |            |            |            |      |  |
| Felis_catus                 |            |            |            | 423        |            |            |            |      |  |
| Ochotona_princeps           |            |            |            | 515        |            |            |            |      |  |
| Cercopithecidae             |            |            |            | 2243       |            |            |            |      |  |
| Carnivora                   |            |            |            | 421        |            |            |            |      |  |
| Mus                         |            |            |            | 2488       |            |            |            |      |  |
| Mus_musculus                |            |            |            | 478        |            |            |            |      |  |
| Rattus_norvegicus           |            |            |            | 420        |            |            |            |      |  |
| Tursiops_truncatus          |            |            |            | 518        |            |            |            |      |  |
| Procavia_capensis           |            |            |            | 442        |            |            |            |      |  |
| Primates                    |            |            |            | 671        |            |            |            |      |  |
| Echinops_telfairi           |            |            |            | 473        |            |            |            |      |  |
| Sorex_araneus               |            |            |            | 494        |            |            |            |      |  |
| Canidae                     |            |            |            | 550        |            |            |            |      |  |
| Otolemur_garnettii          |            |            |            | 413        |            |            |            |      |  |
| Gallus                      |            |            |            | 633        |            |            |            |      |  |
| Callithrix_jacchus          |            |            |            | 495        |            |            |            |      |  |
| Crocodylus_porosus          |            |            |            | 527        |            |            |            |      |  |
| Erinaceus_europaeus         |            |            |            | 420        |            |            |            |      |  |
| rnd-6_family-7426-LTR-ERV1  |            |            |            | 1692       |            |            |            |      |  |
| Esox_lucius                 |            |            |            | 532        |            |            |            |      |  |
| Salmo_salar                 |            |            |            | 801        |            |            |            |      |  |
| Didelphidae                 |            |            |            | 642        |            |            |            |      |  |
| Latimeria_chalumnae         |            |            |            | 1766       |            |            |            |      |  |
| Monodelphis_domestica       |            |            |            | 543        |            |            |            |      |  |
| Macropus_eugenii            |            |            |            | 509        |            |            |            |      |  |
| Alligator_mississippiensis  |            |            |            | 566        |            |            |            |      |  |
| Chrysemys_picta_bellii      |            |            |            | 3578       |            |            |            |      |  |
| Danio_rerio                 |            |            |            | 699        |            |            |            |      |  |
| Taeniopygia                 |            |            |            | 538        |            |            |            |      |  |
| Dasybus_novemcinctus        |            |            |            | 512        |            |            |            |      |  |
| LTR_XT                      |            |            |            | 503        |            |            |            |      |  |
| Haplorrhini                 |            |            |            | 8801       |            |            |            |      |  |
| Catarrhini                  |            |            |            | 7847       |            |            |            |      |  |
| Anolis_carolinensis         |            |            |            | 1184       |            |            |            |      |  |
| Murine_leukemia_virus       |            |            |            | 7615       |            |            |            |      |  |
| Phascolarctos_cinereus      |            |            |            | 7426       |            |            |            |      |  |
| Estrildidae                 |            |            |            | 482        |            |            |            |      |  |
| Xenopus_Silurana_tropicalis |            |            |            | 812        |            |            |            |      |  |
| L_XT                        |            |            |            | 7509       |            |            |            |      |  |
| Takifugu_rubripes           |            |            |            | 707        |            |            |            |      |  |
| Bos_taurus                  |            |            |            | 533        |            |            |            |      |  |
| Homo_sapiens                |            |            |            | 450        |            |            |            |      |  |
| Microcebus_murinus          |            |            |            | 428        |            |            |            |      |  |
| Myotis_lucifugus            |            |            |            | 432        |            |            |            |      |  |
| Equus_caballus              |            |            |            | 450        |            |            |            |      |  |
| Tupaia_belangeri            |            |            |            | 498        |            |            |            |      |  |
| Loxodonta_africana          |            |            |            | 460        |            |            |            |      |  |
| Murinae                     |            |            |            | 489        |            |            |            |      |  |
| Canis_lupus_familiaris      |            |            |            | 536        |            |            |            |      |  |
| Sus_scrofa                  |            |            |            | 454        |            |            |            |      |  |
| Choloepus_hoffmanni         |            |            |            | 444        |            |            |            |      |  |
| Vicugna_pacos               |            |            |            | 474        |            |            |            |      |  |
| Gavialis_gangeticus         |            |            |            | 470        |            |            |            |      |  |
| Mammalia                    |            |            |            | 1337       |            |            |            |      |  |
| Passeroidea                 |            |            |            | 641        |            |            |            |      |  |
| Takifugu                    |            |            |            | 629        |            |            |            |      |  |
| Pteropus_vampyrus           |            |            |            | 472        |            |            |            |      |  |
| Ornithorhynchus             |            |            |            | 2785       |            |            |            |      |  |
| Oryctolagus_cuniculus       |            |            |            | 494        |            |            |            |      |  |
| Gallus_gallus               |            |            |            | 508        |            |            |            |      |  |
| Hominidae                   | TTGCNNNNAN | CNTTAANACC | ANNNNNANNN | GGTNATCNSA | CTTAGCNSCN | TCNNTNCAGT | CAGCCNNNNN | 6256 |  |
| Metatheria                  |            |            |            |            |            |            |            | 569  |  |
| Rodentia                    | TACTGAATAA | CGCTCTGCCT | GGCTGCACTT | TGGAGAATGT | TGGTTGTGTG | TCCCTCCTGG | -GTCAAACCT | 3851 |  |
| Monodelphis                 |            |            |            |            |            |            |            | 857  |  |
| Consensus                   |            |            |            |            |            |            |            |      |  |
| Conservation                | 100%<br>0% |            |            |            |            |            |            |      |  |

|                             | 10,020     | 10,040     | 10,060     | 10,080     |            |             |            |       |
|-----------------------------|------------|------------|------------|------------|------------|-------------|------------|-------|
| Dipodomys_ordii             | -----      | -----      | -----      | -----      | 597        |             |            |       |
| Laurasiatheria              | -----      | -----      | -----      | -----      | 361        |             |            |       |
| Eutheria                    | -----      | -----      | -----      | -----      | 452        |             |            |       |
| Tarsius_syrichta            | -----      | -----      | -----      | -----      | 487        |             |            |       |
| Muridae                     | TAAAAACAGA | ATATACAGAA | AGCCCTTCT  | AAGAAATGCA | CAAGAAAAAT | GTAAATCCAAT | GGCCATAAAA | 4398  |
| Gasterosteus_aculeatus      | -----      | -----      | -----      | -----      | 2399       |             |            |       |
| Felis_silvestris            | -----      | -----      | -----      | -----      | 505        |             |            |       |
| Rattus                      | -----      | -----      | -----      | -----      | 589        |             |            |       |
| Papio_hamadryas             | GTTAAACATA | ATACACGCTA | TGGTGCTAAC | CCAACAGTAT | CAGGTGCTCA | GAACCGATGA  | AGAAGCTCAA | 7365  |
| Pan_troglodytes             | -----      | -----      | -----      | -----      | 4138       |             |            |       |
| Ailuropoda_melanoleuca      | -----      | -----      | -----      | -----      | 462        |             |            |       |
| Cavia_porcellus             | -----      | -----      | -----      | -----      | 527        |             |            |       |
| Ictidomys_tridecemlineatus  | -----      | -----      | -----      | -----      | 530        |             |            |       |
| Canis                       | -----      | -----      | -----      | -----      | 479        |             |            |       |
| Felis_catus                 | -----      | -----      | -----      | -----      | 423        |             |            |       |
| Ochotona_princeps           | -----      | -----      | -----      | -----      | 515        |             |            |       |
| Cercopithecidae             | -----      | -----      | -----      | -----      | 2243       |             |            |       |
| Carnivora                   | -----      | -----      | -----      | -----      | 421        |             |            |       |
| Mus                         | -----      | -----      | -----      | -----      | 2488       |             |            |       |
| Mus_musculus                | -----      | -----      | -----      | -----      | 478        |             |            |       |
| Rattus_norvegicus           | -----      | -----      | -----      | -----      | 420        |             |            |       |
| Tursiops_truncatus          | -----      | -----      | -----      | -----      | 518        |             |            |       |
| Procavia_capensis           | -----      | -----      | -----      | -----      | 442        |             |            |       |
| Primates                    | -----      | -----      | -----      | -----      | 671        |             |            |       |
| Echinops_telfairi           | -----      | -----      | -----      | -----      | 473        |             |            |       |
| Sorex_araneus               | -----      | -----      | -----      | -----      | 494        |             |            |       |
| Canidae                     | -----      | -----      | -----      | -----      | 550        |             |            |       |
| Otolemur_garnettii          | -----      | -----      | -----      | -----      | 413        |             |            |       |
| Gallus                      | -----      | -----      | -----      | -----      | 633        |             |            |       |
| Callithrix_jacchus          | -----      | -----      | -----      | -----      | 495        |             |            |       |
| Crocodylus_porosus          | -----      | -----      | -----      | -----      | 527        |             |            |       |
| Erinaceus_europaeus         | -----      | -----      | -----      | -----      | 420        |             |            |       |
| rnd-6_family-7426-LTR-ERV1  | -----      | -----      | -----      | -----      | 1692       |             |            |       |
| Esox_lucius                 | -----      | -----      | -----      | -----      | 532        |             |            |       |
| Salmo_salar                 | -----      | -----      | -----      | -----      | 801        |             |            |       |
| Didelphidae                 | -----      | -----      | -----      | -----      | 642        |             |            |       |
| Latimeria_chalumnae         | -----      | -----      | -----      | -----      | 1766       |             |            |       |
| Monodelphis_domestica       | -----      | -----      | -----      | -----      | 543        |             |            |       |
| Macropus_eugenii            | -----      | -----      | -----      | -----      | 509        |             |            |       |
| Alligator_mississippiensis  | -----      | -----      | -----      | -----      | 566        |             |            |       |
| Chrysemys_picta_bellii      | -----      | -----      | -----      | -----      | 3578       |             |            |       |
| Danio_rerio                 | -----      | -----      | -----      | -----      | 699        |             |            |       |
| Taeniopygia                 | -----      | -----      | -----      | -----      | 538        |             |            |       |
| Dasybus_novemcinctus        | -----      | -----      | -----      | -----      | 512        |             |            |       |
| LTR_XT                      | -----      | -----      | -----      | -----      | 503        |             |            |       |
| Haplorrhini                 | -----      | -----      | -----      | -----      | 8801       |             |            |       |
| Catarrhini                  | -----      | -----      | -----      | -----      | 7847       |             |            |       |
| Anolis_carolinensis         | -----      | -----      | -----      | -----      | 1184       |             |            |       |
| Murine_leukemia_virus       | -----      | -----      | -----      | -----      | 7615       |             |            |       |
| Phascolarctos_cinereus      | -----      | -----      | -----      | -----      | 7426       |             |            |       |
| Estrildidae                 | -----      | -----      | -----      | -----      | 482        |             |            |       |
| Xenopus_Silurana_tropicalis | -----      | -----      | -----      | -----      | 812        |             |            |       |
| L_XT                        | -----      | -----      | -----      | -----      | 7509       |             |            |       |
| Takifugu_rubripes           | -----      | -----      | -----      | -----      | 707        |             |            |       |
| Bos_taurus                  | -----      | -----      | -----      | -----      | 533        |             |            |       |
| Homo_sapiens                | -----      | -----      | -----      | -----      | 450        |             |            |       |
| Microcebus_murinus          | -----      | -----      | -----      | -----      | 428        |             |            |       |
| Myotis_lucifugus            | -----      | -----      | -----      | -----      | 432        |             |            |       |
| Equus_caballus              | -----      | -----      | -----      | -----      | 450        |             |            |       |
| Tupaia_belangeri            | -----      | -----      | -----      | -----      | 498        |             |            |       |
| Loxodonta_africana          | -----      | -----      | -----      | -----      | 460        |             |            |       |
| Murinae                     | -----      | -----      | -----      | -----      | 489        |             |            |       |
| Canis_lupus_familiaris      | -----      | -----      | -----      | -----      | 536        |             |            |       |
| Sus_scrofa                  | -----      | -----      | -----      | -----      | 454        |             |            |       |
| Choloepus_hoffmanni         | -----      | -----      | -----      | -----      | 444        |             |            |       |
| Vicugna_pacos               | -----      | -----      | -----      | -----      | 474        |             |            |       |
| Gavialis_gangeticus         | -----      | -----      | -----      | -----      | 470        |             |            |       |
| Mammalia                    | -----      | -----      | -----      | -----      | 1337       |             |            |       |
| Passeroidea                 | -----      | -----      | -----      | -----      | 641        |             |            |       |
| Takifugu                    | -----      | -----      | -----      | -----      | 629        |             |            |       |
| Pteropus_vampyrus           | -----      | -----      | -----      | -----      | 472        |             |            |       |
| Ornithorhynchus             | -----      | -----      | -----      | -----      | 2785       |             |            |       |
| Oryctolagus_cuniculus       | -----      | -----      | -----      | -----      | 494        |             |            |       |
| Gallus_gallus               | -----      | -----      | -----      | -----      | 508        |             |            |       |
| Hominidae                   | ANNGCTNNCA | NNGNCANCTN | CNACCGGCAG | CTGACNAGGC | NNAGNCNNNN | CCNTTNTCGT  | GGNTAACNNT | 6326  |
| Metatheria                  | -----      | -----      | -----      | -----      | -----      | -----       | -----      | 569   |
| Rodentia                    | ACGACCACCA | TTTGTGGCCT | CGCCATTGG  | CTTATTAGAC | TCTTTACCT  | CGCTGCTCGT  | TAATTGCTCT | 3921  |
| Monodelphis                 | -----      | -----      | -----      | -----      | -----      | -----       | -----      | 857   |
| Consensus                   | -----      | -----      | -----      | -----      | -----      | -----       | -----      | ----- |
| Conservation                | 100%<br>0% |            |            |            |            |             |            |       |

|                             | 10,100       | 10,120     | 10,140     |            |            |            |            |      |
|-----------------------------|--------------|------------|------------|------------|------------|------------|------------|------|
| Dipodomys_ordii             |              |            |            | 597        |            |            |            |      |
| Laurasiatheria              |              |            |            | 361        |            |            |            |      |
| Eutheria                    |              |            |            | 452        |            |            |            |      |
| Tarsius_syrichta            |              |            |            | 487        |            |            |            |      |
| Muridae                     | TTAAAAATCT   | GGAAAAAAG  | ATTCTGGCCT | TTGGGAAACA | GGAAAAACCT | GGGAATCAG  | ACTCTATGCC | 4468 |
| Gasterosteus_aculeatus      |              |            |            | 2399       |            |            |            |      |
| Felis_silvestris            |              |            |            | 505        |            |            |            |      |
| Rattus                      |              |            |            | 589        |            |            |            |      |
| Papio_hamadryas             | GATTGAGCCT   | CTAAGACACA | AGAAAAAG   |            |            |            |            | 7392 |
| Pan_troglodytes             |              |            |            |            |            |            |            | 4138 |
| Ailuropoda_melanoleuca      |              |            |            |            |            |            |            | 462  |
| Cavia_porcellus             |              |            |            |            |            |            |            | 527  |
| Ictidomys_tridecemlineatus  |              |            |            |            |            |            |            | 530  |
| Canis                       |              |            |            |            |            |            |            | 479  |
| Felis_catus                 |              |            |            |            |            |            |            | 423  |
| Ochotona_princeps           |              |            |            |            |            |            |            | 515  |
| Cercopithecidae             |              |            |            |            |            |            |            | 2243 |
| Carnivora                   |              |            |            |            |            |            |            | 421  |
| Mus                         |              |            |            |            |            |            |            | 2488 |
| Mus_musculus                |              |            |            |            |            |            |            | 478  |
| Rattus_norvegicus           |              |            |            |            |            |            |            | 420  |
| Tursiops_truncatus          |              |            |            |            |            |            |            | 518  |
| Procavia_capensis           |              |            |            |            |            |            |            | 442  |
| Primates                    |              |            |            |            |            |            |            | 671  |
| Echinops_telfairi           |              |            |            |            |            |            |            | 473  |
| Sorex_araneus               |              |            |            |            |            |            |            | 494  |
| Canidae                     |              |            |            |            |            |            |            | 550  |
| Otolemur_garnettii          |              |            |            |            |            |            |            | 413  |
| Gallus                      |              |            |            |            |            |            |            | 633  |
| Callithrix_jacchus          |              |            |            |            |            |            |            | 495  |
| Crocodylus_porosus          |              |            |            |            |            |            |            | 527  |
| Erinaceus_europaeus         |              |            |            |            |            |            |            | 420  |
| rnd-6_family-7426-LTR-ERV1  |              |            |            |            |            |            |            | 1692 |
| Esox_lucius                 |              |            |            |            |            |            |            | 532  |
| Salmo_salar                 |              |            |            |            |            |            |            | 801  |
| Didelphidae                 |              |            |            |            |            |            |            | 642  |
| Latimeria_chalumnae         |              |            |            |            |            |            |            | 1766 |
| Monodelphis_domestica       |              |            |            |            |            |            |            | 543  |
| Macropus_eugenii            |              |            |            |            |            |            |            | 509  |
| Alligator_mississippiensis  |              |            |            |            |            |            |            | 566  |
| Chrysemys_picta_bellii      |              |            |            |            |            |            |            | 3578 |
| Danio_rerio                 |              |            |            |            |            |            |            | 699  |
| Taeniopygia                 |              |            |            |            |            |            |            | 538  |
| Dasybus_novemcinctus        |              |            |            |            |            |            |            | 512  |
| LTR_XT                      |              |            |            |            |            |            |            | 503  |
| Haplorrhini                 |              |            |            |            |            |            |            | 8801 |
| Catarrhini                  |              |            |            |            |            |            |            | 7847 |
| Anolis_carolinensis         |              |            |            |            |            |            |            | 1184 |
| Murine_leukemia_virus       |              |            |            |            |            |            |            | 7615 |
| Phascolarctos_cinereus      |              |            |            |            |            |            |            | 7426 |
| Estrildidae                 |              |            |            |            |            |            |            | 482  |
| Xenopus_Silurana_tropicalis |              |            |            |            |            |            |            | 812  |
| L_XT                        |              |            |            |            |            |            |            | 7509 |
| Takifugu_rubripes           |              |            |            |            |            |            |            | 707  |
| Bos_taurus                  |              |            |            |            |            |            |            | 533  |
| Homo_sapiens                |              |            |            |            |            |            |            | 450  |
| Microcebus_murinus          |              |            |            |            |            |            |            | 428  |
| Myotis_lucifugus            |              |            |            |            |            |            |            | 432  |
| Equus_caballus              |              |            |            |            |            |            |            | 450  |
| Tupaia_belangeri            |              |            |            |            |            |            |            | 498  |
| Loxodonta_africana          |              |            |            |            |            |            |            | 460  |
| Murinae                     |              |            |            |            |            |            |            | 489  |
| Canis_lupus_familiaris      |              |            |            |            |            |            |            | 536  |
| Sus_scrofa                  |              |            |            |            |            |            |            | 454  |
| Choloepus_hoffmanni         |              |            |            |            |            |            |            | 444  |
| Vicugna_pacos               |              |            |            |            |            |            |            | 474  |
| Gavialis_gangeticus         |              |            |            |            |            |            |            | 470  |
| Mammalia                    |              |            |            |            |            |            |            | 1337 |
| Passeroidea                 |              |            |            |            |            |            |            | 641  |
| Takifugu                    |              |            |            |            |            |            |            | 629  |
| Pteropus_vampyrus           |              |            |            |            |            |            |            | 472  |
| Ornithorhynchus             |              |            |            |            |            |            |            | 2785 |
| Oryctolagus_cuniculus       |              |            |            |            |            |            |            | 494  |
| Gallus_gallus               |              |            |            |            |            |            |            | 508  |
| Hominidae                   | ANTC>NNNNAN  | GGNGCNCNNN | TNNTNNANNN | NNCAGGNNTA | NNNAANCTCT | CCCACTGNTT | CCTNTGNNCN | 6396 |
| Metatheria                  |              |            |            |            |            |            |            | 569  |
| Rodentia                    | AAGCCAAA - T | ATTACNACCA | CCNTATCTCT | CCCACATCTC | TCTCTTTGGT | ATCGCAGACT | GCTTTAACTC | 3990 |
| Monodelphis                 |              |            |            |            |            |            |            | 857  |
| Consensus                   |              |            |            |            |            |            |            |      |
| Conservation                |              |            |            |            |            |            |            |      |

|                             | 10,160     | 10,180     | 10,200     | 10,220     |            |             |             |      |
|-----------------------------|------------|------------|------------|------------|------------|-------------|-------------|------|
| Dipodomys_ordii             |            |            |            |            | 597        |             |             |      |
| Laurasiatheria              |            |            |            |            | 361        |             |             |      |
| Eutheria                    |            |            |            |            | 452        |             |             |      |
| Tarsius_syrichtha           |            |            |            |            | 487        |             |             |      |
| Muridae                     | ACAGGAAGGG | ACCTGGGGA  | TAGAGTTAAT | CATTCCCAGC | CAGAAATCAG | CCAGGATTGC  | TGGTTATGCT  | 4538 |
| Gasterosteus_aculeatus      |            |            |            |            | 2399       |             |             |      |
| Felis_silvestris            |            |            |            |            | 505        |             |             |      |
| Rattus                      |            |            |            |            | 589        |             |             |      |
| Papio_hamadryas             |            |            |            |            | 7392       |             |             |      |
| Pan_troglodytes             |            |            |            |            | 4138       |             |             |      |
| Ailuropoda_melanoleuca      |            |            |            |            | 462        |             |             |      |
| Cavia_porcellus             |            |            |            |            | 527        |             |             |      |
| Ictidomys_tridecemlineatus  |            |            |            |            | 530        |             |             |      |
| Canis                       |            |            |            |            | 479        |             |             |      |
| Felis_catus                 |            |            |            |            | 423        |             |             |      |
| Ochotona_princeps           |            |            |            |            | 515        |             |             |      |
| Cercopithecidae             |            |            |            |            | 2243       |             |             |      |
| Carnivora                   |            |            |            |            | 421        |             |             |      |
| Mus                         |            |            |            |            | 2488       |             |             |      |
| Mus_musculus                |            |            |            |            | 478        |             |             |      |
| Rattus_norvegicus           |            |            |            |            | 420        |             |             |      |
| Tursiops_truncatus          |            |            |            |            | 518        |             |             |      |
| Procavia_capensis           |            |            |            |            | 442        |             |             |      |
| Primates                    |            |            |            |            | 671        |             |             |      |
| Echinops_telfairi           |            |            |            |            | 473        |             |             |      |
| Sorex_araneus               |            |            |            |            | 494        |             |             |      |
| Canidae                     |            |            |            |            | 550        |             |             |      |
| Otolemur_garnettii          |            |            |            |            | 413        |             |             |      |
| Gallus                      |            |            |            |            | 633        |             |             |      |
| Callithrix_jacchus          |            |            |            |            | 495        |             |             |      |
| Crocodylus_porosus          |            |            |            |            | 527        |             |             |      |
| Erinaceus_europaeus         |            |            |            |            | 420        |             |             |      |
| rnd-6_family-7426-LTR-ERV1  |            |            |            |            | 1692       |             |             |      |
| Esox_lucius                 |            |            |            |            | 532        |             |             |      |
| Salmo_salar                 |            |            |            |            | 801        |             |             |      |
| Didelphidae                 |            |            |            |            | 642        |             |             |      |
| Latimeria_chalumnae         |            |            |            |            | 1766       |             |             |      |
| Monodelphis_domestica       |            |            |            |            | 543        |             |             |      |
| Macropus_eugenii            |            |            |            |            | 509        |             |             |      |
| Alligator_mississippiensis  |            |            |            |            | 566        |             |             |      |
| Chrysemys_picta_bellii      |            |            |            |            | 3578       |             |             |      |
| Danio_rerio                 |            |            |            |            | 699        |             |             |      |
| Taeniopygia                 |            |            |            |            | 538        |             |             |      |
| Dasybus_novemcinctus        |            |            |            |            | 512        |             |             |      |
| LTR_XT                      |            |            |            |            | 503        |             |             |      |
| Haplorrhini                 |            |            |            |            | 8801       |             |             |      |
| Catarrhini                  |            |            |            |            | 7847       |             |             |      |
| Anolis_carolinensis         |            |            |            |            | 1184       |             |             |      |
| Murine_leukemia_virus       |            |            |            |            | 7615       |             |             |      |
| Phascolarctos_cinereus      |            |            |            |            | 7426       |             |             |      |
| Estrildidae                 |            |            |            |            | 482        |             |             |      |
| Xenopus_Silurana_tropicalis |            |            |            |            | 812        |             |             |      |
| L_XT                        |            |            |            |            | 7509       |             |             |      |
| Takifugu_rubripes           |            |            |            |            | 707        |             |             |      |
| Bos_taurus                  |            |            |            |            | 533        |             |             |      |
| Homo_sapiens                |            |            |            |            | 450        |             |             |      |
| Microcebus_murinus          |            |            |            |            | 428        |             |             |      |
| Myotis_lucifugus            |            |            |            |            | 432        |             |             |      |
| Equus_caballus              |            |            |            |            | 450        |             |             |      |
| Tupaia_belangeri            |            |            |            |            | 498        |             |             |      |
| Loxodonta_africana          |            |            |            |            | 460        |             |             |      |
| Murinae                     |            |            |            |            | 489        |             |             |      |
| Canis_lupus_familiaris      |            |            |            |            | 536        |             |             |      |
| Sus_scrofa                  |            |            |            |            | 454        |             |             |      |
| Choloepus_hoffmanni         |            |            |            |            | 444        |             |             |      |
| Vicugna_pacos               |            |            |            |            | 474        |             |             |      |
| Gavialis_gangeticus         |            |            |            |            | 470        |             |             |      |
| Mammalia                    |            |            |            |            | 1337       |             |             |      |
| Passeroidea                 |            |            |            |            | 641        |             |             |      |
| Takifugu                    |            |            |            |            | 629        |             |             |      |
| Pteropus_vampyrus           |            |            |            |            | 472        |             |             |      |
| Ornithorhynchus             |            |            |            |            | 2785       |             |             |      |
| Oryctolagus_cuniculus       |            |            |            |            | 494        |             |             |      |
| Gallus_gallus               |            |            |            |            | 508        |             |             |      |
| Hominidae                   | GCCCTCGGNN | NACCNCCNNT | AGTAGCNGTN | CCNCTNCCNN | NNNCNTTTAA | NNNNNCNNGN  | AANNNNNCCNN | 6466 |
| Metatheria                  |            |            |            |            |            |             |             | 569  |
| Rodentia                    | CTCAGGGACA | CACTTTGTGG | GCACACTGGA | TCCNCAGAC  | TGCAATAATA | CCNTAACCCCT | TAGCACTACC  | 4060 |
| Monodelphis                 |            |            |            |            |            |             |             | 857  |
| Consensus                   |            |            |            |            |            |             |             |      |
| Conservation                | 100%<br>0% |            |            |            |            |             |             |      |

|                             | 10,240     | 10,260     | 10,280      |            |            |             |             |      |  |
|-----------------------------|------------|------------|-------------|------------|------------|-------------|-------------|------|--|
| Dipodomys_ordii             |            |            |             | 597        |            |             |             |      |  |
| Laurasiatheria              |            |            |             | 361        |            |             |             |      |  |
| Eutheria                    |            |            |             | 452        |            |             |             |      |  |
| Tarsius_syrichtha           |            |            |             | 487        |            |             |             |      |  |
| Muridae                     | TAGACACCCG | GCCCCCGTAC | TACATAGGGA  | TAGGAACTAA | CCAGACTGTC | AGCCCATTTGA | CTGACAAAAC  | 4608 |  |
| Gasterosteus_aculeatus      |            |            |             | 2399       |            |             |             |      |  |
| Felis_silvestris            |            |            |             | 505        |            |             |             |      |  |
| Rattus                      |            |            |             | 589        |            |             |             |      |  |
| Papio_hamadryas             |            |            |             | 7392       |            |             |             |      |  |
| Pan_troglodytes             |            |            |             | 4138       |            |             |             |      |  |
| Ailuropoda_melanoleuca      |            |            |             | 462        |            |             |             |      |  |
| Cavia_porcellus             |            |            |             | 527        |            |             |             |      |  |
| Ictidomys_tridecemlineatus  |            |            |             | 530        |            |             |             |      |  |
| Canis                       |            |            |             | 479        |            |             |             |      |  |
| Felis_catus                 |            |            |             | 423        |            |             |             |      |  |
| Ochotona_princeps           |            |            |             | 515        |            |             |             |      |  |
| Cercopithecidae             |            |            |             | 2243       |            |             |             |      |  |
| Carnivora                   |            |            |             | 421        |            |             |             |      |  |
| Mus                         |            |            |             | 2488       |            |             |             |      |  |
| Mus_musculus                |            |            |             | 478        |            |             |             |      |  |
| Rattus_norvegicus           |            |            |             | 420        |            |             |             |      |  |
| Tursiops_truncatus          |            |            |             | 518        |            |             |             |      |  |
| Procavia_capensis           |            |            |             | 442        |            |             |             |      |  |
| Primates                    |            |            |             | 671        |            |             |             |      |  |
| Echinops_telfairi           |            |            |             | 473        |            |             |             |      |  |
| Sorex_araneus               |            |            |             | 494        |            |             |             |      |  |
| Canidae                     |            |            |             | 550        |            |             |             |      |  |
| Otolemur_garnettii          |            |            |             | 413        |            |             |             |      |  |
| Gallus                      |            |            |             | 633        |            |             |             |      |  |
| Callithrix_jacchus          |            |            |             | 495        |            |             |             |      |  |
| Crocodylus_porosus          |            |            |             | 527        |            |             |             |      |  |
| Erinaceus_europaeus         |            |            |             | 420        |            |             |             |      |  |
| rnd-6_family-7426-LTR-ERV1  |            |            |             | 1692       |            |             |             |      |  |
| Esox_lucius                 |            |            |             | 532        |            |             |             |      |  |
| Salmo_salar                 |            |            |             | 801        |            |             |             |      |  |
| Didelphidae                 |            |            |             | 642        |            |             |             |      |  |
| Latimeria_chalumnae         |            |            |             | 1766       |            |             |             |      |  |
| Monodelphis_domestica       |            |            |             | 543        |            |             |             |      |  |
| Macropus_eugenii            |            |            |             | 509        |            |             |             |      |  |
| Alligator_mississippiensis  |            |            |             | 566        |            |             |             |      |  |
| Chrysemys_picta_bellii      |            |            |             | 3578       |            |             |             |      |  |
| Danio_rerio                 |            |            |             | 699        |            |             |             |      |  |
| Taeniopygia                 |            |            |             | 538        |            |             |             |      |  |
| Dasybus_novemcinctus        |            |            |             | 512        |            |             |             |      |  |
| LTR_XT                      |            |            |             | 503        |            |             |             |      |  |
| Haplorrhini                 |            |            |             | 8801       |            |             |             |      |  |
| Catarrhini                  |            |            |             | 7847       |            |             |             |      |  |
| Anolis_carolinensis         |            |            |             | 1184       |            |             |             |      |  |
| Murine_leukemia_virus       |            |            |             | 7615       |            |             |             |      |  |
| Phascolarctos_cinereus      |            |            |             | 7426       |            |             |             |      |  |
| Estrildidae                 |            |            |             | 482        |            |             |             |      |  |
| Xenopus_Silurana_tropicalis |            |            |             | 812        |            |             |             |      |  |
| L_XT                        |            |            |             | 7509       |            |             |             |      |  |
| Takifugu_rubripes           |            |            |             | 707        |            |             |             |      |  |
| Bos_taurus                  |            |            |             | 533        |            |             |             |      |  |
| Homo_sapiens                |            |            |             | 450        |            |             |             |      |  |
| Microcebus_murinus          |            |            |             | 428        |            |             |             |      |  |
| Myotis_lucifugus            |            |            |             | 432        |            |             |             |      |  |
| Equus_caballus              |            |            |             | 450        |            |             |             |      |  |
| Tupaia_belangeri            |            |            |             | 498        |            |             |             |      |  |
| Loxodonta_africana          |            |            |             | 460        |            |             |             |      |  |
| Murinae                     |            |            |             | 489        |            |             |             |      |  |
| Canis_lupus_familiaris      |            |            |             | 536        |            |             |             |      |  |
| Sus_scrofa                  |            |            |             | 454        |            |             |             |      |  |
| Choloepus_hoffmanni         |            |            |             | 444        |            |             |             |      |  |
| Vicugna_pacos               |            |            |             | 474        |            |             |             |      |  |
| Gavialis_gangeticus         |            |            |             | 470        |            |             |             |      |  |
| Mammalia                    |            |            |             | 1337       |            |             |             |      |  |
| Passeroidea                 |            |            |             | 641        |            |             |             |      |  |
| Takifugu                    |            |            |             | 629        |            |             |             |      |  |
| Pteropus_vampyrus           |            |            |             | 472        |            |             |             |      |  |
| Ornithorhynchus             |            |            |             | 2785       |            |             |             |      |  |
| Oryctolagus_cuniculus       |            |            |             | 494        |            |             |             |      |  |
| Gallus_gallus               |            |            |             | 508        |            |             |             |      |  |
| Hominidae                   | CCNNNNNNNC | NNNNGTCNNN | NNNGNNCAGG  | TCCCNCTNTT | CNNAGACCCN | NNNNNNNCNCN | AGTTCCCNNTT | 6536 |  |
| Metatheria                  |            |            |             |            |            |             |             | 569  |  |
| Rodentia                    | ACCCAGCCCC | TATGCCCGAA | CGTTCACAAAT | GCCTCNATTC | TCTGCGGCAC | TCAAGTNTAC  | CACTGCCTAC  | 4130 |  |
| Monodelphis                 |            |            |             |            |            |             |             | 857  |  |
| Consensus                   |            |            |             |            |            |             |             |      |  |
| Conservation                | 100%<br>0% |            |             |            |            |             |             |      |  |

|                             | 10,300     | 10,320     | 10,340     | 10,360     |            |            |            |      |
|-----------------------------|------------|------------|------------|------------|------------|------------|------------|------|
| Dipodomys_ordii             |            |            |            |            | 597        |            |            |      |
| Laurasiatheria              |            |            |            |            | 361        |            |            |      |
| Eutheria                    |            |            |            |            | 452        |            |            |      |
| Tarsius_syrichta            |            |            |            |            | 487        |            |            |      |
| Muridae                     | TCACTGTGAC | TGGGGGCAGC | CCAAATTAAC | GTTAGAGGAC | TTACAAGGGG | CTAAAACTTG | TCTAATATCC | 4678 |
| Gasterosteus_aculeatus      |            |            |            |            | 2399       |            |            |      |
| Felis_silvestris            |            |            |            |            | 505        |            |            |      |
| Rattus                      |            |            |            |            | 589        |            |            |      |
| Papio_hamadryas             |            |            |            |            | 7392       |            |            |      |
| Pan_troglodytes             |            |            |            |            | 4138       |            |            |      |
| Ailuropoda_melanoleuca      |            |            |            |            | 462        |            |            |      |
| Cavia_porcellus             |            |            |            |            | 527        |            |            |      |
| Ictidomys_tridecemlineatus  |            |            |            |            | 530        |            |            |      |
| Canis                       |            |            |            |            | 479        |            |            |      |
| Felis_catus                 |            |            |            |            | 423        |            |            |      |
| Ochotona_princeps           |            |            |            |            | 515        |            |            |      |
| Cercopithecidae             |            |            |            |            | 2243       |            |            |      |
| Carnivora                   |            |            |            |            | 421        |            |            |      |
| Mus                         |            |            |            |            | 2488       |            |            |      |
| Mus_musculus                |            |            |            |            | 478        |            |            |      |
| Rattus_norvegicus           |            |            |            |            | 420        |            |            |      |
| Tursiops_truncatus          |            |            |            |            | 518        |            |            |      |
| Procavia_capensis           |            |            |            |            | 442        |            |            |      |
| Primates                    |            |            |            |            | 671        |            |            |      |
| Echinops_telfairi           |            |            |            |            | 473        |            |            |      |
| Sorex_araneus               |            |            |            |            | 494        |            |            |      |
| Canidae                     |            |            |            |            | 550        |            |            |      |
| Otolemur_garnettii          |            |            |            |            | 413        |            |            |      |
| Gallus                      |            |            |            |            | 633        |            |            |      |
| Callithrix_jacchus          |            |            |            |            | 495        |            |            |      |
| Crocodylus_porosus          |            |            |            |            | 527        |            |            |      |
| Erinaceus_europaeus         |            |            |            |            | 420        |            |            |      |
| rnd-6_family-7426-LTR-ERV1  |            |            |            |            | 1692       |            |            |      |
| Esox_lucius                 |            |            |            |            | 532        |            |            |      |
| Salmo_salar                 |            |            |            |            | 801        |            |            |      |
| Didelphidae                 |            |            |            |            | 642        |            |            |      |
| Latimeria_chalumnae         |            |            |            |            | 1766       |            |            |      |
| Monodelphis_domestica       |            |            |            |            | 543        |            |            |      |
| Macropus_eugenii            |            |            |            |            | 509        |            |            |      |
| Alligator_mississippiensis  |            |            |            |            | 566        |            |            |      |
| Chrysemys_picta_bellii      |            |            |            |            | 3578       |            |            |      |
| Danio_rerio                 |            |            |            |            | 699        |            |            |      |
| Taeniopygia                 |            |            |            |            | 538        |            |            |      |
| Dasybus_novemcinctus        |            |            |            |            | 512        |            |            |      |
| LTR_XT                      |            |            |            |            | 503        |            |            |      |
| Haplorrhini                 |            |            |            |            | 8801       |            |            |      |
| Catarrhini                  |            |            |            |            | 7847       |            |            |      |
| Anolis_carolinensis         |            |            |            |            | 1184       |            |            |      |
| Murine_leukemia_virus       |            |            |            |            | 7615       |            |            |      |
| Phascolarctos_cinereus      |            |            |            |            | 7426       |            |            |      |
| Estrildidae                 |            |            |            |            | 482        |            |            |      |
| Xenopus_Silurana_tropicalis |            |            |            |            | 812        |            |            |      |
| L_XT                        |            |            |            |            | 7509       |            |            |      |
| Takifugu_rubripes           |            |            |            |            | 707        |            |            |      |
| Bos_taurus                  |            |            |            |            | 533        |            |            |      |
| Homo_sapiens                |            |            |            |            | 450        |            |            |      |
| Microcebus_murinus          |            |            |            |            | 428        |            |            |      |
| Myotis_lucifugus            |            |            |            |            | 432        |            |            |      |
| Equus_caballus              |            |            |            |            | 450        |            |            |      |
| Tupaia_belangeri            |            |            |            |            | 498        |            |            |      |
| Loxodonta_africana          |            |            |            |            | 460        |            |            |      |
| Murinae                     |            |            |            |            | 489        |            |            |      |
| Canis_lupus_familiaris      |            |            |            |            | 536        |            |            |      |
| Sus_scrofa                  |            |            |            |            | 454        |            |            |      |
| Choloepus_hoffmanni         |            |            |            |            | 444        |            |            |      |
| Vicugna_pacos               |            |            |            |            | 474        |            |            |      |
| Gavialis_gangeticus         |            |            |            |            | 470        |            |            |      |
| Mammalia                    |            |            |            |            | 1337       |            |            |      |
| Passeroidea                 |            |            |            |            | 641        |            |            |      |
| Takifugu                    |            |            |            |            | 629        |            |            |      |
| Pteropus_vampyrus           |            |            |            |            | 472        |            |            |      |
| Ornithorhynchus             |            |            |            |            | 2785       |            |            |      |
| Oryctolagus_cuniculus       |            |            |            |            | 494        |            |            |      |
| Gallus_gallus               |            |            |            |            | 508        |            |            |      |
| Hominidae                   | CTGNTACN   | ACNCCNAANN | CNTCNTGGTG | NAACCAGACC | NATTCTGGNT | NCNTANCTAN | CNNCNCNGCA | 6606 |
| Metatheria                  |            |            |            |            |            |            |            | 569  |
| Rodentia                    | CCGCCGGGTG | GTCTGGGACT | TGTGCCCTGG | TGTTCTTTTT | TCCAAAATA  | GGAGTGGTAC | CTGGTGAAGA | 4200 |
| Monodelphis                 |            |            |            |            |            |            |            | 857  |
| Consensus                   |            |            |            |            |            |            |            |      |
| Conservation                | 100%<br>0% |            |            |            |            |            |            |      |



|                             | 10,380      | 10,400     | 10,420      |            |            |            |            |      |
|-----------------------------|-------------|------------|-------------|------------|------------|------------|------------|------|
| Dipodomys_ordii             |             |            |             | 597        |            |            |            |      |
| Laurasiatheria              |             |            |             | 361        |            |            |            |      |
| Eutheria                    |             |            |             | 452        |            |            |            |      |
| Tarsius_syrichta            |             |            |             | 487        |            |            |            |      |
| Muridae                     | AAAAACCTTTA | ACCTAGGCAN | TTCCCTTAT   | TCTGATGCTT | GCTATTCTGC | CTTATGGGTT | AATTCATCTG | 4748 |
| Gasterosteus_aculeatus      |             |            |             | 2399       |            |            |            |      |
| Felis_silvestris            |             |            |             | 505        |            |            |            |      |
| Rattus                      |             |            |             | 589        |            |            |            |      |
| Papio_hamadryas             |             |            |             | 7392       |            |            |            |      |
| Pan_troglodytes             |             |            |             | 4138       |            |            |            |      |
| Ailuropoda_melanoleuca      |             |            |             | 462        |            |            |            |      |
| Cavia_porcellus             |             |            |             | 527        |            |            |            |      |
| Ictidomys_tridecemlineatus  |             |            |             | 530        |            |            |            |      |
| Canis                       |             |            |             | 479        |            |            |            |      |
| Felis_catus                 |             |            |             | 423        |            |            |            |      |
| Ochotona_princeps           |             |            |             | 515        |            |            |            |      |
| Cercopithecidae             |             |            |             | 2243       |            |            |            |      |
| Carnivora                   |             |            |             | 421        |            |            |            |      |
| Mus                         |             |            |             | 2488       |            |            |            |      |
| Mus_musculus                |             |            |             | 478        |            |            |            |      |
| Rattus_norvegicus           |             |            |             | 420        |            |            |            |      |
| Tursiops_truncatus          |             |            |             | 518        |            |            |            |      |
| Procavia_capensis           |             |            |             | 442        |            |            |            |      |
| Primates                    |             |            |             | 671        |            |            |            |      |
| Echinops_telfairi           |             |            |             | 473        |            |            |            |      |
| Sorex_araneus               |             |            |             | 494        |            |            |            |      |
| Canidae                     |             |            |             | 550        |            |            |            |      |
| Otolemur_garnettii          |             |            |             | 413        |            |            |            |      |
| Gallus                      |             |            |             | 633        |            |            |            |      |
| Callithrix_jacchus          |             |            |             | 495        |            |            |            |      |
| Crocodylus_porosus          |             |            |             | 527        |            |            |            |      |
| Erinaceus_europaeus         |             |            |             | 420        |            |            |            |      |
| rnd-6_family-7426-LTR-ERV1  |             |            |             | 1692       |            |            |            |      |
| Esox_lucius                 |             |            |             | 532        |            |            |            |      |
| Salmo_salar                 |             |            |             | 801        |            |            |            |      |
| Didelphidae                 |             |            |             | 642        |            |            |            |      |
| Latimeria_chalumnae         |             |            |             | 1766       |            |            |            |      |
| Monodelphis_domestica       |             |            |             | 543        |            |            |            |      |
| Macropus_eugenii            |             |            |             | 509        |            |            |            |      |
| Alligator_mississippiensis  |             |            |             | 566        |            |            |            |      |
| Chrysemys_picta_bellii      |             |            |             | 3578       |            |            |            |      |
| Danio_rerio                 |             |            |             | 699        |            |            |            |      |
| Taeniopygia                 |             |            |             | 538        |            |            |            |      |
| Dasybus_novemcinctus        |             |            |             | 512        |            |            |            |      |
| LTR_XT                      |             |            |             | 503        |            |            |            |      |
| Haplorrhini                 |             |            |             | 8801       |            |            |            |      |
| Catarrhini                  |             |            |             | 7847       |            |            |            |      |
| Anolis_carolinensis         |             |            |             | 1184       |            |            |            |      |
| Murine_leukemia_virus       |             |            |             | 7615       |            |            |            |      |
| Phascolarctos_cinereus      |             |            |             | 7426       |            |            |            |      |
| Estrildidae                 |             |            |             | 482        |            |            |            |      |
| Xenopus_Silurana_tropicalis |             |            |             | 812        |            |            |            |      |
| L_XT                        |             |            |             | 7509       |            |            |            |      |
| Takifugu_rubripes           |             |            |             | 707        |            |            |            |      |
| Bos_taurus                  |             |            |             | 533        |            |            |            |      |
| Homo_sapiens                |             |            |             | 450        |            |            |            |      |
| Microcebus_murinus          |             |            |             | 428        |            |            |            |      |
| Myotis_lucifugus            |             |            |             | 432        |            |            |            |      |
| Equus_caballus              |             |            |             | 450        |            |            |            |      |
| Tupaia_belangeri            |             |            |             | 498        |            |            |            |      |
| Loxodonta_africana          |             |            |             | 460        |            |            |            |      |
| Murinae                     |             |            |             | 489        |            |            |            |      |
| Canis_lupus_familiaris      |             |            |             | 536        |            |            |            |      |
| Sus_scrofa                  |             |            |             | 454        |            |            |            |      |
| Choloepus_hoffmanni         |             |            |             | 444        |            |            |            |      |
| Vicugna_pacos               |             |            |             | 474        |            |            |            |      |
| Gavialis_gangeticus         |             |            |             | 470        |            |            |            |      |
| Mammalia                    |             |            |             | 1337       |            |            |            |      |
| Passeroidea                 |             |            |             | 641        |            |            |            |      |
| Takifugu                    |             |            |             | 629        |            |            |            |      |
| Pteropus_vampyrus           |             |            |             | 472        |            |            |            |      |
| Ornithorhynchus             |             |            |             | 2785       |            |            |            |      |
| Oryctolagus_cuniculus       |             |            |             | 494        |            |            |            |      |
| Gallus_gallus               |             |            |             | 508        |            |            |            |      |
| Hominidae                   | CGNCGNGNG   | GCTACTTCTG | GTGTAACCTNC | ACNCTNACNA | AANNTCTTAA | NNNNNCNNNT | AANNANACCC | 6676 |
| Metatheria                  |             |            |             |            |            |            |            | 569  |
| Rodentia                    | ACCCTTGCCA  | GTTCCCATCA | CAGGGTTTAT  | AGCGGCANGG | CATGACAAAT | GAGCGGTTCA | GATCCTACCC | 4270 |
| Monodelphis                 |             |            |             |            |            |            |            | 857  |
| Consensus                   |             |            |             |            |            |            |            |      |
| Conservation                | 100%<br>0%  |            |             |            |            |            |            |      |

|                             | 10,440     | 10,460     | 10,480    | 10,500     |            |            |            |      |
|-----------------------------|------------|------------|-----------|------------|------------|------------|------------|------|
| Dipodomys_ordii             |            |            |           |            | 597        |            |            |      |
| Laurasiatheria              |            |            |           |            | 361        |            |            |      |
| Eutheria                    |            |            |           |            | 452        |            |            |      |
| Tarsius_syrichtha           |            |            |           |            | 487        |            |            |      |
| Muridae                     | GATAACAGCA | ATATTACCGA | GCCCTGAGA | CTACTTGGTG | GGCATGTACT | AATGGTTTGA | CTAAATGTGC | 4818 |
| Gasterosteus_aculeatus      |            |            |           |            | 2399       |            |            |      |
| Felis_silvestris            |            |            |           |            | 505        |            |            |      |
| Rattus                      |            |            |           |            | 589        |            |            |      |
| Papio_hamadryas             |            |            |           |            | 7392       |            |            |      |
| Pan_troglodytes             |            |            |           |            | 4138       |            |            |      |
| Ailuropoda_melanoleuca      |            |            |           |            | 462        |            |            |      |
| Cavia_porcellus             |            |            |           |            | 527        |            |            |      |
| Ictidomys_tridecemlineatus  |            |            |           |            | 530        |            |            |      |
| Canis                       |            |            |           |            | 479        |            |            |      |
| Felis_catus                 |            |            |           |            | 423        |            |            |      |
| Ochotona_princeps           |            |            |           |            | 515        |            |            |      |
| Cercopithecidae             |            |            |           |            | 2243       |            |            |      |
| Carnivora                   |            |            |           |            | 421        |            |            |      |
| Mus                         |            |            |           |            | 2488       |            |            |      |
| Mus_musculus                |            |            |           |            | 478        |            |            |      |
| Rattus_norvegicus           |            |            |           |            | 420        |            |            |      |
| Tursiops_truncatus          |            |            |           |            | 518        |            |            |      |
| Procavia_capensis           |            |            |           |            | 442        |            |            |      |
| Primates                    |            |            |           |            | 671        |            |            |      |
| Echinops_telfairi           |            |            |           |            | 473        |            |            |      |
| Sorex_araneus               |            |            |           |            | 494        |            |            |      |
| Canidae                     |            |            |           |            | 550        |            |            |      |
| Otolemur_garnettii          |            |            |           |            | 413        |            |            |      |
| Gallus                      |            |            |           |            | 633        |            |            |      |
| Callithrix_jacchus          |            |            |           |            | 495        |            |            |      |
| Crocodylus_porosus          |            |            |           |            | 527        |            |            |      |
| Erinaceus_europaeus         |            |            |           |            | 420        |            |            |      |
| rnd-6_family-7426-LTR-ERV1  |            |            |           |            | 1692       |            |            |      |
| Esox_lucius                 |            |            |           |            | 532        |            |            |      |
| Salmo_salar                 |            |            |           |            | 801        |            |            |      |
| Didelphidae                 |            |            |           |            | 642        |            |            |      |
| Latimeria_chalumnae         |            |            |           |            | 1766       |            |            |      |
| Monodelphis_domestica       |            |            |           |            | 543        |            |            |      |
| Macropus_eugenii            |            |            |           |            | 509        |            |            |      |
| Alligator_mississippiensis  |            |            |           |            | 566        |            |            |      |
| Chrysemys_picta_bellii      |            |            |           |            | 3578       |            |            |      |
| Danio_rerio                 |            |            |           |            | 699        |            |            |      |
| Taeniopygia                 |            |            |           |            | 538        |            |            |      |
| Dasybus_novemcinctus        |            |            |           |            | 512        |            |            |      |
| LTR_XT                      |            |            |           |            | 503        |            |            |      |
| Haplorrhini                 |            |            |           |            | 8801       |            |            |      |
| Catarrhini                  |            |            |           |            | 7847       |            |            |      |
| Anolis_carolinensis         |            |            |           |            | 1184       |            |            |      |
| Murine_leukemia_virus       |            |            |           |            | 7615       |            |            |      |
| Phascolarctos_cinereus      |            |            |           |            | 7426       |            |            |      |
| Estrildidae                 |            |            |           |            | 482        |            |            |      |
| Xenopus_Silurana_tropicalis |            |            |           |            | 812        |            |            |      |
| L_XT                        |            |            |           |            | 7509       |            |            |      |
| Takifugu_rubripes           |            |            |           |            | 707        |            |            |      |
| Bos_taurus                  |            |            |           |            | 533        |            |            |      |
| Homo_sapiens                |            |            |           |            | 450        |            |            |      |
| Microcebus_murinus          |            |            |           |            | 428        |            |            |      |
| Myotis_lucifugus            |            |            |           |            | 432        |            |            |      |
| Equus_caballus              |            |            |           |            | 450        |            |            |      |
| Tupaia_belangeri            |            |            |           |            | 498        |            |            |      |
| Loxodonta_africana          |            |            |           |            | 460        |            |            |      |
| Murinae                     |            |            |           |            | 489        |            |            |      |
| Canis_lupus_familiaris      |            |            |           |            | 536        |            |            |      |
| Sus_scrofa                  |            |            |           |            | 454        |            |            |      |
| Choloepus_hoffmanni         |            |            |           |            | 444        |            |            |      |
| Vicugna_pacos               |            |            |           |            | 474        |            |            |      |
| Gavialis_gangeticus         |            |            |           |            | 470        |            |            |      |
| Mammalia                    |            |            |           |            | 1337       |            |            |      |
| Passeroidea                 |            |            |           |            | 641        |            |            |      |
| Takifugu                    |            |            |           |            | 629        |            |            |      |
| Pteropus_vampyrus           |            |            |           |            | 472        |            |            |      |
| Ornithorhynchus             |            |            |           |            | 2785       |            |            |      |
| Oryctolagus_cuniculus       |            |            |           |            | 494        |            |            |      |
| Gallus_gallus               |            |            |           |            | 508        |            |            |      |
| Hominidae                   | TTTCTAGAAA | CTTNTGCNTN | CCCNCTCTC | TNNTNCCTNG | NCTNACNCTN | TANAGNNAGG | NNGAACTTAG | 6746 |
| Metatheria                  |            |            |           |            |            |            |            | 569  |
| Rodentia                    | TTTCTTGCAG | TCCTGGGTAT | AACTGCT   | GGTGTGCC   | ACTGGAACGG | CAG-GACTGA | CTACTTCCCT | 4335 |
| Monodelphis                 |            |            |           |            |            |            |            | 857  |
| Consensus                   |            |            |           |            |            |            |            |      |
| Conservation                |            |            |           |            |            |            |            |      |

|                             | 10,520     | 10,540     | 10,560     |            |            |             |            |      |
|-----------------------------|------------|------------|------------|------------|------------|-------------|------------|------|
| Dipodomys_ordii             |            |            |            | 597        |            |             |            |      |
| Laurasiatheria              |            |            |            | 361        |            |             |            |      |
| Eutheria                    |            |            |            | 452        |            |             |            |      |
| Tarsius_syrichta            |            |            |            | 487        |            |             |            |      |
| Muridae                     | CTCTTCTGAT | GCTTTCCAAA | CTAAGTAGAC | AGGTTGATCA | GGACCTAGAG | GTATTAAGAAG | TTTCGTTTCT | 4888 |
| Gasterosteus_aculeatus      |            |            |            | 2399       |            |             |            |      |
| Felis_silvestris            |            |            |            | 505        |            |             |            |      |
| Rattus                      |            |            |            | 589        |            |             |            |      |
| Papio_hamadryas             |            |            |            | 7392       |            |             |            |      |
| Pan_troglodytes             |            |            |            | 4138       |            |             |            |      |
| Ailuropoda_melanoleuca      |            |            |            | 462        |            |             |            |      |
| Cavia_porcellus             |            |            |            | 527        |            |             |            |      |
| Ictidomys_tridecemlineatus  |            |            |            | 530        |            |             |            |      |
| Canis                       |            |            |            | 479        |            |             |            |      |
| Felis_catus                 |            |            |            | 423        |            |             |            |      |
| Ochotona_princeps           |            |            |            | 515        |            |             |            |      |
| Cercopithecidae             |            |            |            | 2243       |            |             |            |      |
| Carnivora                   |            |            |            | 421        |            |             |            |      |
| Mus                         |            |            |            | 2488       |            |             |            |      |
| Mus_musculus                |            |            |            | 478        |            |             |            |      |
| Rattus_norvegicus           |            |            |            | 420        |            |             |            |      |
| Tursiops_truncatus          |            |            |            | 518        |            |             |            |      |
| Procavia_capensis           |            |            |            | 442        |            |             |            |      |
| Primates                    |            |            |            | 671        |            |             |            |      |
| Echinops_telfairi           |            |            |            | 473        |            |             |            |      |
| Sorex_araneus               |            |            |            | 494        |            |             |            |      |
| Canidae                     |            |            |            | 550        |            |             |            |      |
| Otolemur_garnettii          |            |            |            | 413        |            |             |            |      |
| Gallus                      |            |            |            | 633        |            |             |            |      |
| Callithrix_jacchus          |            |            |            | 495        |            |             |            |      |
| Crocodylus_porosus          |            |            |            | 527        |            |             |            |      |
| Erinaceus_europaeus         |            |            |            | 420        |            |             |            |      |
| rnd-6_family-7426-LTR-ERV1  |            |            |            | 1692       |            |             |            |      |
| Esox_lucius                 |            |            |            | 532        |            |             |            |      |
| Salmo_salar                 |            |            |            | 801        |            |             |            |      |
| Didelphidae                 |            |            |            | 642        |            |             |            |      |
| Latimeria_chalumnae         |            |            |            | 1766       |            |             |            |      |
| Monodelphis_domestica       |            |            |            | 543        |            |             |            |      |
| Macropus_eugenii            |            |            |            | 509        |            |             |            |      |
| Alligator_mississippiensis  |            |            |            | 566        |            |             |            |      |
| Chrysemys_picta_bellii      |            |            |            | 3578       |            |             |            |      |
| Danio_rerio                 |            |            |            | 699        |            |             |            |      |
| Taeniopygia                 |            |            |            | 538        |            |             |            |      |
| Dasybus_novemcinctus        |            |            |            | 512        |            |             |            |      |
| LTR_XT                      |            |            |            | 503        |            |             |            |      |
| Haplorrhini                 |            |            |            | 8801       |            |             |            |      |
| Catarrhini                  |            |            |            | 7847       |            |             |            |      |
| Anolis_carolinensis         |            |            |            | 1184       |            |             |            |      |
| Murine_leukemia_virus       |            |            |            | 7615       |            |             |            |      |
| Phascolarctos_cinereus      |            |            |            | 7426       |            |             |            |      |
| Estrildidae                 |            |            |            | 482        |            |             |            |      |
| Xenopus_Silurana_tropicalis |            |            |            | 812        |            |             |            |      |
| L_XT                        |            |            |            | 7509       |            |             |            |      |
| Takifugu_rubripes           |            |            |            | 707        |            |             |            |      |
| Bos_taurus                  |            |            |            | 533        |            |             |            |      |
| Homo_sapiens                |            |            |            | 450        |            |             |            |      |
| Microcebus_murinus          |            |            |            | 428        |            |             |            |      |
| Myotis_lucifugus            |            |            |            | 432        |            |             |            |      |
| Equus_caballus              |            |            |            | 450        |            |             |            |      |
| Tupaia_belangeri            |            |            |            | 498        |            |             |            |      |
| Loxodonta_africana          |            |            |            | 460        |            |             |            |      |
| Murinae                     |            |            |            | 489        |            |             |            |      |
| Canis_lupus_familiaris      |            |            |            | 536        |            |             |            |      |
| Sus_scrofa                  |            |            |            | 454        |            |             |            |      |
| Choloepus_hoffmanni         |            |            |            | 444        |            |             |            |      |
| Vicugna_pacos               |            |            |            | 474        |            |             |            |      |
| Gavialis_gangeticus         |            |            |            | 470        |            |             |            |      |
| Mammalia                    |            |            |            | 1337       |            |             |            |      |
| Passeroidea                 |            |            |            | 641        |            |             |            |      |
| Takifugu                    |            |            |            | 629        |            |             |            |      |
| Pteropus_vampyrus           |            |            |            | 472        |            |             |            |      |
| Ornithorhynchus             |            |            |            | 2785       |            |             |            |      |
| Oryctolagus_cuniculus       |            |            |            | 494        |            |             |            |      |
| Gallus_gallus               |            |            |            | 508        |            |             |            |      |
| Hominidae                   | CNNTNNNCTN | GNCTGGANCN | NGCCNANGCN | NCNNAATAAA | AGCAANCAGG | CNNTTTTCCN  | ACCNNTNGTA | 6816 |
| Metatheria                  |            |            |            |            |            |             |            | 569  |
| Rodentia                    | AGCTATTTAC | CATCGGTTTT | CCTCTCAGTT | CATCCAGGAT | CTCCAACAGG | TGGCTCAGAC  | CATCCTCACC | 4405 |
| Monodelphis                 |            |            |            |            |            |             |            | 857  |
| Consensus                   |            |            |            |            |            |             |            |      |
| Conservation                | 100%<br>0% |            |            |            |            |             |            |      |

|                             | 10,580     | 10,600     | 10,620      | 10,640     |            |            |            |      |
|-----------------------------|------------|------------|-------------|------------|------------|------------|------------|------|
| Dipodomys_ordii             |            |            |             |            | 597        |            |            |      |
| Laurasiatheria              |            |            |             |            | 361        |            |            |      |
| Eutheria                    |            |            |             |            | 452        |            |            |      |
| Tarsius_syrichtha           |            |            |             |            | 487        |            |            |      |
| Muridae                     | GAATTA AAC | AACAGTTAGA | TTCCTTGCA   | GAAATGGTCC | TACAAAATTG | GAGAGGCTTA | GACTTACTTC | 4958 |
| Gasterosteus_aculeatus      |            |            |             |            | 2399       |            |            |      |
| Felis_silvestris            |            |            |             |            | 505        |            |            |      |
| Rattus                      |            |            |             |            | 589        |            |            |      |
| Papio_hamadryas             |            |            |             |            | 7392       |            |            |      |
| Pan_troglodytes             |            |            |             |            | 4138       |            |            |      |
| Ailuropoda_melanoleuca      |            |            |             |            | 462        |            |            |      |
| Cavia_porcellus             |            |            |             |            | 527        |            |            |      |
| Ictidomys_tridecemlineatus  |            |            |             |            | 530        |            |            |      |
| Canis                       |            |            |             |            | 479        |            |            |      |
| Felis_catus                 |            |            |             |            | 423        |            |            |      |
| Ochotona_princeps           |            |            |             |            | 515        |            |            |      |
| Cercopithecidae             |            |            |             |            | 2243       |            |            |      |
| Carnivora                   |            |            |             |            | 421        |            |            |      |
| Mus                         |            |            |             |            | 2488       |            |            |      |
| Mus_musculus                |            |            |             |            | 478        |            |            |      |
| Rattus_norvegicus           |            |            |             |            | 420        |            |            |      |
| Tursiops_truncatus          |            |            |             |            | 518        |            |            |      |
| Procavia_capensis           |            |            |             |            | 442        |            |            |      |
| Primates                    |            |            |             |            | 671        |            |            |      |
| Echinops_telfairi           |            |            |             |            | 473        |            |            |      |
| Sorex_araneus               |            |            |             |            | 494        |            |            |      |
| Canidae                     |            |            |             |            | 550        |            |            |      |
| Otolemur_garnettii          |            |            |             |            | 413        |            |            |      |
| Gallus                      |            |            |             |            | 633        |            |            |      |
| Callithrix_jacchus          |            |            |             |            | 495        |            |            |      |
| Crocodylus_porosus          |            |            |             |            | 527        |            |            |      |
| Erinaceus_europaeus         |            |            |             |            | 420        |            |            |      |
| rnd-6_family-7426-LTR-ERV1  |            |            |             |            | 1692       |            |            |      |
| Esox_lucius                 |            |            |             |            | 532        |            |            |      |
| Salmo_salar                 |            |            |             |            | 801        |            |            |      |
| Didelphidae                 |            |            |             |            | 642        |            |            |      |
| Latimeria_chalumnae         |            |            |             |            | 1766       |            |            |      |
| Monodelphis_domestica       |            |            |             |            | 543        |            |            |      |
| Macropus_eugenii            |            |            |             |            | 509        |            |            |      |
| Alligator_mississippiensis  |            |            |             |            | 566        |            |            |      |
| Chrysemys_picta_bellii      |            |            |             |            | 3578       |            |            |      |
| Danio_rerio                 |            |            |             |            | 699        |            |            |      |
| Taeniopygia                 |            |            |             |            | 538        |            |            |      |
| Dasybus_novemcinctus        |            |            |             |            | 512        |            |            |      |
| LTR_XT                      |            |            |             |            | 503        |            |            |      |
| Haplorrhini                 |            |            |             |            | 8801       |            |            |      |
| Catarrhini                  |            |            |             |            | 7847       |            |            |      |
| Anolis_carolinensis         |            |            |             |            | 1184       |            |            |      |
| Murine_leukemia_virus       |            |            |             |            | 7615       |            |            |      |
| Phascolarctos_cinereus      |            |            |             |            | 7426       |            |            |      |
| Estrildidae                 |            |            |             |            | 482        |            |            |      |
| Xenopus_Silurana_tropicalis |            |            |             |            | 812        |            |            |      |
| L_XT                        |            |            |             |            | 7509       |            |            |      |
| Takifugu_rubripes           |            |            |             |            | 707        |            |            |      |
| Bos_taurus                  |            |            |             |            | 533        |            |            |      |
| Homo_sapiens                |            |            |             |            | 450        |            |            |      |
| Microcebus_murinus          |            |            |             |            | 428        |            |            |      |
| Myotis_lucifugus            |            |            |             |            | 432        |            |            |      |
| Equus_caballus              |            |            |             |            | 450        |            |            |      |
| Tupaia_belangeri            |            |            |             |            | 498        |            |            |      |
| Loxodonta_africana          |            |            |             |            | 460        |            |            |      |
| Murinae                     |            |            |             |            | 489        |            |            |      |
| Canis_lupus_familiaris      |            |            |             |            | 536        |            |            |      |
| Sus_scrofa                  |            |            |             |            | 454        |            |            |      |
| Choloepus_hoffmanni         |            |            |             |            | 444        |            |            |      |
| Vicugna_pacos               |            |            |             |            | 474        |            |            |      |
| Gavialis_gangeticus         |            |            |             |            | 470        |            |            |      |
| Mammalia                    |            |            |             |            | 1337       |            |            |      |
| Passeroidea                 |            |            |             |            | 641        |            |            |      |
| Takifugu                    |            |            |             |            | 629        |            |            |      |
| Pteropus_vampyrus           |            |            |             |            | 472        |            |            |      |
| Ornithorhynchus             |            |            |             |            | 2785       |            |            |      |
| Oryctolagus_cuniculus       |            |            |             |            | 494        |            |            |      |
| Gallus_gallus               |            |            |             |            | 508        |            |            |      |
| Hominidae                   | NTAGGNNCT  | CCTTNNCCTC | CTC NNTNGTN | GCNTCNGGGC | TNGGNANAGG | NGCNNTNNNN | CANTNNATNN | 6886 |
| Metatheria                  |            |            |             |            |            |            |            | 569  |
| Rodentia                    | CTCCAGGGCC | AAATAGACTC | ACTGGCNGCC  | GTGGTGCTAC | AAAATCGGCG | AGGATTAGAT | TTACTAACAG | 4475 |
| Monodelphis                 |            |            |             |            |            |            |            | 857  |
| Consensus                   |            |            |             |            |            |            |            |      |
| Conservation                | 100%<br>0% |            |             |            |            |            |            |      |

|                             | 10,660     | 10,680     | 10,700     |      |
|-----------------------------|------------|------------|------------|------|
| Dipodomys_ordii             |            |            |            | 597  |
| Laurasiatheria              |            |            |            | 361  |
| Eutheria                    |            |            |            | 452  |
| Tarsius_syrichtha           |            |            |            | 487  |
| Muridae                     | TCATGAGATA | AAGGAAACTA | TGTATGGCTT | 5028 |
| Gasterosteus_aculeatus      |            |            |            | 2399 |
| Felis_silvestris            |            |            |            | 505  |
| Rattus                      |            |            |            | 589  |
| Papio_hamadryas             |            |            |            | 7392 |
| Pan_troglodytes             |            |            |            | 4138 |
| Ailuropoda_melanoleuca      |            |            |            | 462  |
| Cavia_porcellus             |            |            |            | 527  |
| Ictidomys_tridecemlineatus  |            |            |            | 530  |
| Canis                       |            |            |            | 479  |
| Felis_catus                 |            |            |            | 423  |
| Ochotona_princeps           |            |            |            | 515  |
| Cercopithecidae             |            |            |            | 2243 |
| Carnivora                   |            |            |            | 421  |
| Mus                         |            |            |            | 2488 |
| Mus_musculus                |            |            |            | 478  |
| Rattus_norvegicus           |            |            |            | 420  |
| Tursiops_truncatus          |            |            |            | 518  |
| Procavia_capensis           |            |            |            | 442  |
| Primates                    |            |            |            | 671  |
| Echinops_telfairi           |            |            |            | 473  |
| Sorex_araneus               |            |            |            | 494  |
| Canidae                     |            |            |            | 550  |
| Otolemur_garnettii          |            |            |            | 413  |
| Gallus                      |            |            |            | 633  |
| Callithrix_jacchus          |            |            |            | 495  |
| Crocodylus_porosus          |            |            |            | 527  |
| Erinaceus_europaeus         |            |            |            | 420  |
| rnd-6_family-7426-LTR-ERV1  |            |            |            | 1692 |
| Esox_lucius                 |            |            |            | 532  |
| Salmo_salar                 |            |            |            | 801  |
| Didelphidae                 |            |            |            | 642  |
| Latimeria_chalumnae         |            |            |            | 1766 |
| Monodelphis_domestica       |            |            |            | 543  |
| Macropus_eugenii            |            |            |            | 509  |
| Alligator_mississippiensis  |            |            |            | 566  |
| Chrysemys_picta_bellii      |            |            |            | 3578 |
| Danio_rerio                 |            |            |            | 699  |
| Taeniopygia                 |            |            |            | 538  |
| Dasybus_novemcinctus        |            |            |            | 512  |
| LTR_XT                      |            |            |            | 503  |
| Haplorrhini                 |            |            |            | 8801 |
| Catarrhini                  |            |            |            | 7847 |
| Anolis_carolinensis         |            |            |            | 1184 |
| Murine_leukemia_virus       |            |            |            | 7615 |
| Phascolarctos_cinereus      |            |            |            | 7426 |
| Estrildidae                 |            |            |            | 482  |
| Xenopus_Silurana_tropicalis |            |            |            | 812  |
| L_XT                        |            |            |            | 7509 |
| Takifugu_rubripes           |            |            |            | 707  |
| Bos_taurus                  |            |            |            | 533  |
| Homo_sapiens                |            |            |            | 450  |
| Microcebus_murinus          |            |            |            | 428  |
| Myotis_lucifugus            |            |            |            | 432  |
| Equus_caballus              |            |            |            | 450  |
| Tupaia_belangeri            |            |            |            | 498  |
| Loxodonta_africana          |            |            |            | 460  |
| Murinae                     |            |            |            | 489  |
| Canis_lupus_familiaris      |            |            |            | 536  |
| Sus_scrofa                  |            |            |            | 454  |
| Choloepus_hoffmanni         |            |            |            | 444  |
| Vicugna_pacos               |            |            |            | 474  |
| Gavialis_gangeticus         |            |            |            | 470  |
| Mammalia                    |            |            |            | 1337 |
| Passeroidea                 |            |            |            | 641  |
| Takifugu                    |            |            |            | 629  |
| Pteropus_vampyrus           |            |            |            | 472  |
| Ornithorhynchus             |            |            |            | 2785 |
| Oryctolagus_cuniculus       |            |            |            | 494  |
| Gallus_gallus               |            |            |            | 508  |
| Hominidae                   | NNNCNTCNA  | AGATCTNTCT | ANTNNNCTNC | 6956 |
| Metatheria                  |            |            |            | 569  |
| Rodentia                    | CAGAGAGAGG | TGGTCTTTGT | CTCTTCCTCG | 4545 |
| Monodelphis                 |            |            |            | 857  |
| Consensus                   |            |            |            |      |
| Conservation                | 100%       |            |            | 0%   |

|                             | 10,720     | 10,740     | 10,760      | 10,780     |            |             |            |       |
|-----------------------------|------------|------------|-------------|------------|------------|-------------|------------|-------|
| Dipodomys_ordii             | -----      | -----      | -----       | -----      | 597        |             |            |       |
| Laurasiatheria              | -----      | -----      | -----       | -----      | 361        |             |            |       |
| Eutheria                    | -----      | -----      | -----       | -----      | 452        |             |            |       |
| Tarsius_syrichta            | -----      | -----      | -----       | -----      | 487        |             |            |       |
| Muridae                     | AATTAGAAA  | AATCTTGCCA | TGGTTGGGGA  | AAACTCAAAA | AGAAAAAGAG | ACAAAGACAT  | AAATCAGATA | 5098  |
| Gasterosteus_aculeatus      | -----      | -----      | -----       | -----      | 2399       |             |            |       |
| Felis_silvestris            | -----      | -----      | -----       | -----      | 505        |             |            |       |
| Rattus                      | -----      | -----      | -----       | -----      | 589        |             |            |       |
| Papio_hamadryas             | -----      | -----      | -----       | -----      | 7392       |             |            |       |
| Pan_troglodytes             | -----      | -----      | -----       | -----      | 4138       |             |            |       |
| Ailuropoda_melanoleuca      | -----      | -----      | -----       | -----      | 462        |             |            |       |
| Cavia_porcellus             | -----      | -----      | -----       | -----      | 527        |             |            |       |
| Ictidomys_tridecemlineatus  | -----      | -----      | -----       | -----      | 530        |             |            |       |
| Canis                       | -----      | -----      | -----       | -----      | 479        |             |            |       |
| Felis_catus                 | -----      | -----      | -----       | -----      | 423        |             |            |       |
| Ochotona_princeps           | -----      | -----      | -----       | -----      | 515        |             |            |       |
| Cercopithecidae             | -----      | -----      | -----       | -----      | 2243       |             |            |       |
| Carnivora                   | -----      | -----      | -----       | -----      | 421        |             |            |       |
| Mus                         | -----      | -----      | -----       | -----      | 2488       |             |            |       |
| Mus_musculus                | -----      | -----      | -----       | -----      | 478        |             |            |       |
| Rattus_norvegicus           | -----      | -----      | -----       | -----      | 420        |             |            |       |
| Tursiops_truncatus          | -----      | -----      | -----       | -----      | 518        |             |            |       |
| Procavia_capensis           | -----      | -----      | -----       | -----      | 442        |             |            |       |
| Primates                    | -----      | -----      | -----       | -----      | 671        |             |            |       |
| Echinops_telfairi           | -----      | -----      | -----       | -----      | 473        |             |            |       |
| Sorex_araneus               | -----      | -----      | -----       | -----      | 494        |             |            |       |
| Canidae                     | -----      | -----      | -----       | -----      | 550        |             |            |       |
| Otolemur_garnettii          | -----      | -----      | -----       | -----      | 413        |             |            |       |
| Gallus                      | -----      | -----      | -----       | -----      | 633        |             |            |       |
| Callithrix_jacchus          | -----      | -----      | -----       | -----      | 495        |             |            |       |
| Crocodylus_porosus          | -----      | -----      | -----       | -----      | 527        |             |            |       |
| Erinaceus_europaeus         | -----      | -----      | -----       | -----      | 420        |             |            |       |
| rnd-6_family-7426-LTR-ERV1  | -----      | -----      | -----       | -----      | 1692       |             |            |       |
| Esox_lucius                 | -----      | -----      | -----       | -----      | 532        |             |            |       |
| Salmo_salar                 | -----      | -----      | -----       | -----      | 801        |             |            |       |
| Didelphidae                 | -----      | -----      | -----       | -----      | 642        |             |            |       |
| Latimeria_chalumnae         | -----      | -----      | -----       | -----      | 1766       |             |            |       |
| Monodelphis_domestica       | -----      | -----      | -----       | -----      | 543        |             |            |       |
| Macropus_eugenii            | -----      | -----      | -----       | -----      | 509        |             |            |       |
| Alligator_mississippiensis  | -----      | -----      | -----       | -----      | 566        |             |            |       |
| Chrysemys_picta_bellii      | -----      | -----      | -----       | -----      | 3578       |             |            |       |
| Danio_rerio                 | -----      | -----      | -----       | -----      | 699        |             |            |       |
| Taeniopygia                 | -----      | -----      | -----       | -----      | 538        |             |            |       |
| Dasybus_novemcinctus        | -----      | -----      | -----       | -----      | 512        |             |            |       |
| LTR_XT                      | -----      | -----      | -----       | -----      | 503        |             |            |       |
| Haplorrhini                 | -----      | -----      | -----       | -----      | 8801       |             |            |       |
| Catarrhini                  | -----      | -----      | -----       | -----      | 7847       |             |            |       |
| Anolis_carolinensis         | -----      | -----      | -----       | -----      | 1184       |             |            |       |
| Murine_leukemia_virus       | -----      | -----      | -----       | -----      | 7615       |             |            |       |
| Phascolarctos_cinereus      | -----      | -----      | -----       | -----      | 7426       |             |            |       |
| Estrildidae                 | -----      | -----      | -----       | -----      | 482        |             |            |       |
| Xenopus_Silurana_tropicalis | -----      | -----      | -----       | -----      | 812        |             |            |       |
| L_XT                        | -----      | -----      | -----       | -----      | 7509       |             |            |       |
| Takifugu_rubripes           | -----      | -----      | -----       | -----      | 707        |             |            |       |
| Bos_taurus                  | -----      | -----      | -----       | -----      | 533        |             |            |       |
| Homo_sapiens                | -----      | -----      | -----       | -----      | 450        |             |            |       |
| Microcebus_murinus          | -----      | -----      | -----       | -----      | 428        |             |            |       |
| Myotis_lucifugus            | -----      | -----      | -----       | -----      | 432        |             |            |       |
| Equus_caballus              | -----      | -----      | -----       | -----      | 450        |             |            |       |
| Tupaia_belangeri            | -----      | -----      | -----       | -----      | 498        |             |            |       |
| Loxodonta_africana          | -----      | -----      | -----       | -----      | 460        |             |            |       |
| Murinae                     | -----      | -----      | -----       | -----      | 489        |             |            |       |
| Canis_lupus_familiaris      | -----      | -----      | -----       | -----      | 536        |             |            |       |
| Sus_scrofa                  | -----      | -----      | -----       | -----      | 454        |             |            |       |
| Choloepus_hoffmanni         | -----      | -----      | -----       | -----      | 444        |             |            |       |
| Vicugna_pacos               | -----      | -----      | -----       | -----      | 474        |             |            |       |
| Gavialis_gangeticus         | -----      | -----      | -----       | -----      | 470        |             |            |       |
| Mammalia                    | -----      | -----      | -----       | -----      | 1337       |             |            |       |
| Passeroidea                 | -----      | -----      | -----       | -----      | 641        |             |            |       |
| Takifugu                    | -----      | -----      | -----       | -----      | 629        |             |            |       |
| Pteropus_vampyrus           | -----      | -----      | -----       | -----      | 472        |             |            |       |
| Ornithorhynchus             | -----      | -----      | -----       | -----      | 2785       |             |            |       |
| Oryctolagus_cuniculus       | -----      | -----      | -----       | -----      | 494        |             |            |       |
| Gallus_gallus               | -----      | -----      | -----       | -----      | 508        |             |            |       |
| Hominidae                   | ACAGNGACAG | ATNACNTCNG | TNGCENNAGGT | NGCNNNNCAG | AACNGGNGNG | CCNTAGANNNT | NCTNACNGCN | 7026  |
| Metatheria                  | -----      | -----      | -----       | -----      | 569        |             |            |       |
| Rodentia                    | A-AAAGATAA | GATCCGACAA | CTCCAGACAG  | ATCTCCGAAA | ACGTNAAGAA | ACAGCTTGAT  | GCCTCTGGCC | 4614  |
| Monodelphis                 | -----      | -----      | -----       | -----      | 857        |             |            |       |
| Consensus                   | -----      | -----      | -----       | -----      | -----      | -----       | -----      | ----- |
| Conservation                | 100%<br>0% |            |             |            |            |             |            |       |

|                             | 10,800     | 10,820     | 10,840     |            |            |            |            |      |
|-----------------------------|------------|------------|------------|------------|------------|------------|------------|------|
| Dipodomys_ordii             | -----      | -----      | -----      | 597        |            |            |            |      |
| Laurasiatheria              | -----      | -----      | -----      | 361        |            |            |            |      |
| Eutheria                    | -----      | -----      | -----      | 452        |            |            |            |      |
| Tarsius_syrichtha           | -----      | -----      | -----      | 487        |            |            |            |      |
| Muridae                     | ATTGGTACCA | GTCTCTGTTC | TCTTGGTCCC | CTGGCTAACT | ACTCTGCTAT | CAGCACTGGC | TGGGCCTTTA | 5168 |
| Gasterosteus_aculeatus      | -----      | -----      | -----      | 2399       |            |            |            |      |
| Felis_silvestris            | -----      | -----      | -----      | 505        |            |            |            |      |
| Rattus                      | -----      | -----      | -----      | 589        |            |            |            |      |
| Papio_hamadryas             | -----      | -----      | -----      | 7392       |            |            |            |      |
| Pan_troglodytes             | -----      | -----      | -----      | 4138       |            |            |            |      |
| Ailuropoda_melanoleuca      | -----      | -----      | -----      | 462        |            |            |            |      |
| Cavia_porcellus             | -----      | -----      | -----      | 527        |            |            |            |      |
| Ictidomys_tridecemlineatus  | -----      | -----      | -----      | 530        |            |            |            |      |
| Canis                       | -----      | -----      | -----      | 479        |            |            |            |      |
| Felis_catus                 | -----      | -----      | -----      | 423        |            |            |            |      |
| Ochotona_princeps           | -----      | -----      | -----      | 515        |            |            |            |      |
| Cercopithecidae             | -----      | -----      | -----      | 2243       |            |            |            |      |
| Carnivora                   | -----      | -----      | -----      | 421        |            |            |            |      |
| Mus                         | -----      | -----      | -----      | 2488       |            |            |            |      |
| Mus_musculus                | -----      | -----      | -----      | 478        |            |            |            |      |
| Rattus_norvegicus           | -----      | -----      | -----      | 420        |            |            |            |      |
| Tursiops_truncatus          | -----      | -----      | -----      | 518        |            |            |            |      |
| Procavia_capensis           | -----      | -----      | -----      | 442        |            |            |            |      |
| Primates                    | -----      | -----      | -----      | 671        |            |            |            |      |
| Echinops_telfairi           | -----      | -----      | -----      | 473        |            |            |            |      |
| Sorex_araneus               | -----      | -----      | -----      | 494        |            |            |            |      |
| Canidae                     | -----      | -----      | -----      | 550        |            |            |            |      |
| Otolemur_garnettii          | -----      | -----      | -----      | 413        |            |            |            |      |
| Gallus                      | -----      | -----      | -----      | 633        |            |            |            |      |
| Callithrix_jacchus          | -----      | -----      | -----      | 495        |            |            |            |      |
| Crocodylus_porosus          | -----      | -----      | -----      | 527        |            |            |            |      |
| Erinaceus_europaeus         | -----      | -----      | -----      | 420        |            |            |            |      |
| rnd-6_family-7426-LTR-ERV1  | -----      | -----      | -----      | 1692       |            |            |            |      |
| Esox_lucius                 | -----      | -----      | -----      | 532        |            |            |            |      |
| Salmo_salar                 | -----      | -----      | -----      | 801        |            |            |            |      |
| Didelphidae                 | -----      | -----      | -----      | 642        |            |            |            |      |
| Latimeria_chalumnae         | -----      | -----      | -----      | 1766       |            |            |            |      |
| Monodelphis_domestica       | -----      | -----      | -----      | 543        |            |            |            |      |
| Macropus_eugenii            | -----      | -----      | -----      | 509        |            |            |            |      |
| Alligator_mississippiensis  | -----      | -----      | -----      | 566        |            |            |            |      |
| Chrysemys_picta_bellii      | -----      | -----      | -----      | 3578       |            |            |            |      |
| Danio_rerio                 | -----      | -----      | -----      | 699        |            |            |            |      |
| Taeniopygia                 | -----      | -----      | -----      | 538        |            |            |            |      |
| Dasybus_novemcinctus        | -----      | -----      | -----      | 512        |            |            |            |      |
| LTR_XT                      | -----      | -----      | -----      | 503        |            |            |            |      |
| Haplorrhini                 | -----      | -----      | -----      | 8801       |            |            |            |      |
| Catarrhini                  | -----      | -----      | -----      | 7847       |            |            |            |      |
| Anolis_carolinensis         | -----      | -----      | -----      | 1184       |            |            |            |      |
| Murine_leukemia_virus       | -----      | -----      | -----      | 7615       |            |            |            |      |
| Phascolarctos_cinereus      | -----      | -----      | -----      | 7426       |            |            |            |      |
| Estrildidae                 | -----      | -----      | -----      | 482        |            |            |            |      |
| Xenopus_Silurana_tropicalis | -----      | -----      | -----      | 812        |            |            |            |      |
| L_XT                        | -----      | -----      | -----      | 7509       |            |            |            |      |
| Takifugu_rubripes           | -----      | -----      | -----      | 707        |            |            |            |      |
| Bos_taurus                  | -----      | -----      | -----      | 533        |            |            |            |      |
| Homo_sapiens                | -----      | -----      | -----      | 450        |            |            |            |      |
| Microcebus_murinus          | -----      | -----      | -----      | 428        |            |            |            |      |
| Myotis_lucifugus            | -----      | -----      | -----      | 432        |            |            |            |      |
| Equus_caballus              | -----      | -----      | -----      | 450        |            |            |            |      |
| Tupaia_belangeri            | -----      | -----      | -----      | 498        |            |            |            |      |
| Loxodonta_africana          | -----      | -----      | -----      | 460        |            |            |            |      |
| Murinae                     | -----      | -----      | -----      | 489        |            |            |            |      |
| Canis_lupus_familiaris      | -----      | -----      | -----      | 536        |            |            |            |      |
| Sus_scrofa                  | -----      | -----      | -----      | 454        |            |            |            |      |
| Choloepus_hoffmanni         | -----      | -----      | -----      | 444        |            |            |            |      |
| Vicugna_pacos               | -----      | -----      | -----      | 474        |            |            |            |      |
| Gavialis_gangeticus         | -----      | -----      | -----      | 470        |            |            |            |      |
| Mammalia                    | -----      | -----      | -----      | 1337       |            |            |            |      |
| Passeroidea                 | -----      | -----      | -----      | 641        |            |            |            |      |
| Takifugu                    | -----      | -----      | -----      | 629        |            |            |            |      |
| Pteropus_vampyrus           | -----      | -----      | -----      | 472        |            |            |            |      |
| Ornithorhynchus             | -----      | -----      | -----      | 2785       |            |            |            |      |
| Oryctolagus_cuniculus       | -----      | -----      | -----      | 494        |            |            |            |      |
| Gallus_gallus               | -----      | -----      | -----      | 508        |            |            |            |      |
| Hominidae                   | GANAAAGGNG | GNACNTGNN  | NTTNNNTNNG | GAAGANTGCT | GNTATTANNT | CAANGANTCA | GGNNTAGTNG | 7096 |
| Metatheria                  | -----      | -----      | -----      | 569        |            |            |            |      |
| Rodentia                    | AGTGGNTCAT | TGACAGTCCA | GTATGGAATT | GGATACTNCC | CTTCTTAACC | CCTTTCTCCT | CCTTTTCTTA | 4684 |
| Monodelphis                 | -----      | -----      | -----      | 857        |            |            |            |      |
| Consensus                   | -----      | -----      | -----      | -----      |            |            |            |      |
| Conservation                | 100%       | -----      | -----      | -----      |            |            |            |      |
|                             | 0%         | -----      | -----      | -----      |            |            |            |      |

|                             | 10,860     | 10,880     | 10,900     | 10,920     |            |            |            |      |
|-----------------------------|------------|------------|------------|------------|------------|------------|------------|------|
| Dipodomys_ordii             |            |            |            |            | 597        |            |            |      |
| Laurasiatheria              |            |            |            |            | 361        |            |            |      |
| Eutheria                    |            |            |            |            | 452        |            |            |      |
| Tarsius_syrichta            |            |            |            |            | 487        |            |            |      |
| Muridae                     | ATTCTCATT  | TGATTGGATT | AACAGCGGGG | CCCTGCATCT | TAAACTATAT | GGCAATATGT | ATCAGTTCAG | 5238 |
| Gasterosteus_aculeatus      |            |            |            |            | 2399       |            |            |      |
| Felis_silvestris            |            |            |            |            | 505        |            |            |      |
| Rattus                      |            |            |            |            | 589        |            |            |      |
| Papio_hamadryas             |            |            |            |            | 7392       |            |            |      |
| Pan_troglodytes             |            |            |            |            | 4138       |            |            |      |
| Ailuropoda_melanoleuca      |            |            |            |            | 462        |            |            |      |
| Cavia_porcellus             |            |            |            |            | 527        |            |            |      |
| Ictidomys_tridecemlineatus  |            |            |            |            | 530        |            |            |      |
| Canis                       |            |            |            |            | 479        |            |            |      |
| Felis_catus                 |            |            |            |            | 423        |            |            |      |
| Ochotona_princeps           |            |            |            |            | 515        |            |            |      |
| Cercopithecidae             |            |            |            |            | 2243       |            |            |      |
| Carnivora                   |            |            |            |            | 421        |            |            |      |
| Mus                         |            |            |            |            | 2488       |            |            |      |
| Mus_musculus                |            |            |            |            | 478        |            |            |      |
| Rattus_norvegicus           |            |            |            |            | 420        |            |            |      |
| Tursiops_truncatus          |            |            |            |            | 518        |            |            |      |
| Procavia_capensis           |            |            |            |            | 442        |            |            |      |
| Primates                    |            |            |            |            | 671        |            |            |      |
| Echinops_telfairi           |            |            |            |            | 473        |            |            |      |
| Sorex_araneus               |            |            |            |            | 494        |            |            |      |
| Canidae                     |            |            |            |            | 550        |            |            |      |
| Otolemur_garnettii          |            |            |            |            | 413        |            |            |      |
| Gallus                      |            |            |            |            | 633        |            |            |      |
| Callithrix_jacchus          |            |            |            |            | 495        |            |            |      |
| Crocodylus_porosus          |            |            |            |            | 527        |            |            |      |
| Erinaceus_europaeus         |            |            |            |            | 420        |            |            |      |
| rnd-6_family-7426-LTR-ERV1  |            |            |            |            | 1692       |            |            |      |
| Esox_lucius                 |            |            |            |            | 532        |            |            |      |
| Salmo_salar                 |            |            |            |            | 801        |            |            |      |
| Didelphidae                 |            |            |            |            | 642        |            |            |      |
| Latimeria_chalumnae         |            |            |            |            | 1766       |            |            |      |
| Monodelphis_domestica       |            |            |            |            | 543        |            |            |      |
| Macropus_eugenii            |            |            |            |            | 509        |            |            |      |
| Alligator_mississippiensis  |            |            |            |            | 566        |            |            |      |
| Chrysemys_picta_bellii      |            |            |            |            | 3578       |            |            |      |
| Danio_rerio                 |            |            |            |            | 699        |            |            |      |
| Taeniopygia                 |            |            |            |            | 538        |            |            |      |
| Dasybus_novemcinctus        |            |            |            |            | 512        |            |            |      |
| LTR_XT                      |            |            |            |            | 503        |            |            |      |
| Haplorrhini                 |            |            |            |            | 8801       |            |            |      |
| Catarrhini                  |            |            |            |            | 7847       |            |            |      |
| Anolis_carolinensis         |            |            |            |            | 1184       |            |            |      |
| Murine_leukemia_virus       |            |            |            |            | 7615       |            |            |      |
| Phascolarctos_cinereus      |            |            |            |            | 7426       |            |            |      |
| Estrildidae                 |            |            |            |            | 482        |            |            |      |
| Xenopus_Silurana_tropicalis |            |            |            |            | 812        |            |            |      |
| L_XT                        |            |            |            |            | 7509       |            |            |      |
| Takifugu_rubripes           |            |            |            |            | 707        |            |            |      |
| Bos_taurus                  |            |            |            |            | 533        |            |            |      |
| Homo_sapiens                |            |            |            |            | 450        |            |            |      |
| Microcebus_murinus          |            |            |            |            | 428        |            |            |      |
| Myotis_lucifugus            |            |            |            |            | 432        |            |            |      |
| Equus_caballus              |            |            |            |            | 450        |            |            |      |
| Tupaia_belangeri            |            |            |            |            | 498        |            |            |      |
| Loxodonta_africana          |            |            |            |            | 460        |            |            |      |
| Murinae                     |            |            |            |            | 489        |            |            |      |
| Canis_lupus_familiaris      |            |            |            |            | 536        |            |            |      |
| Sus_scrofa                  |            |            |            |            | 454        |            |            |      |
| Choloepus_hoffmanni         |            |            |            |            | 444        |            |            |      |
| Vicugna_pacos               |            |            |            |            | 474        |            |            |      |
| Gavialis_gangeticus         |            |            |            |            | 470        |            |            |      |
| Mammalia                    |            |            |            |            | 1337       |            |            |      |
| Passeroidea                 |            |            |            |            | 641        |            |            |      |
| Takifugu                    |            |            |            |            | 629        |            |            |      |
| Pteropus_vampyrus           |            |            |            |            | 472        |            |            |      |
| Ornithorhynchus             |            |            |            |            | 2785       |            |            |      |
| Oryctolagus_cuniculus       |            |            |            |            | 494        |            |            |      |
| Gallus_gallus               |            |            |            |            | 508        |            |            |      |
| Hominidae                   | ANACCANNNT | NCNNACNNTN | NANAAAAAAA | AGATCCNNGA | NGNNNTNNAN | CNNNCCTNCN | NNNCTCNCNN | 7166 |
| Metatheria                  |            |            |            |            |            |            |            | 569  |
| Rodentia                    | ATCCTACTAA | TCGCACCCTG | CCTCATAAAC | ---TTCTTGT | CTAGATTTCT | TCAACAACAG | ATCCAAAAGA | 4751 |
| Monodelphis                 |            |            |            |            |            |            |            | 857  |
| Consensus                   |            |            |            |            |            |            |            |      |
| Conservation                | 100%<br>0% |            |            |            |            |            |            |      |



|                             | 10,940      | 10,960     | 10,980     |            |            |            |            |      |
|-----------------------------|-------------|------------|------------|------------|------------|------------|------------|------|
| Dipodomys_ordii             |             |            |            | 597        |            |            |            |      |
| Laurasiatheria              |             |            |            | 361        |            |            |            |      |
| Eutheria                    |             |            |            | 452        |            |            |            |      |
| Tarsius_syrichta            |             |            |            | 487        |            |            |            |      |
| Muridae                     | TAAAAATTAAT | GGTCCTTGA  | CCAACTACAC | CTCTTTAGAG | CAGGATGAGT | CCACGATTTG | ACTCATTAC  | 5308 |
| Gasterosteus_aculeatus      |             |            |            | 2399       |            |            |            |      |
| Felis_silvestris            |             |            |            | 505        |            |            |            |      |
| Rattus                      |             |            |            | 589        |            |            |            |      |
| Papio_hamadryas             |             |            |            | 7392       |            |            |            |      |
| Pan_troglodytes             |             |            |            | 4138       |            |            |            |      |
| Ailuropoda_melanoleuca      |             |            |            | 462        |            |            |            |      |
| Cavia_porcellus             |             |            |            | 527        |            |            |            |      |
| Ictidomys_tridecemlineatus  |             |            |            | 530        |            |            |            |      |
| Canis                       |             |            |            | 479        |            |            |            |      |
| Felis_catus                 |             |            |            | 423        |            |            |            |      |
| Ochotona_princeps           |             |            |            | 515        |            |            |            |      |
| Cercopithecidae             |             |            |            | 2243       |            |            |            |      |
| Carnivora                   |             |            |            | 421        |            |            |            |      |
| Mus                         |             |            |            | 2488       |            |            |            |      |
| Mus_musculus                |             |            |            | 478        |            |            |            |      |
| Rattus_norvegicus           |             |            |            | 420        |            |            |            |      |
| Tursiops_truncatus          |             |            |            | 518        |            |            |            |      |
| Procavia_capensis           |             |            |            | 442        |            |            |            |      |
| Primates                    |             |            |            | 671        |            |            |            |      |
| Echinops_telfairi           |             |            |            | 473        |            |            |            |      |
| Sorex_araneus               |             |            |            | 494        |            |            |            |      |
| Canidae                     |             |            |            | 550        |            |            |            |      |
| Otolemur_garnettii          |             |            |            | 413        |            |            |            |      |
| Gallus                      |             |            |            | 633        |            |            |            |      |
| Callithrix_jacchus          |             |            |            | 495        |            |            |            |      |
| Crocodylus_porosus          |             |            |            | 527        |            |            |            |      |
| Erinaceus_europaeus         |             |            |            | 420        |            |            |            |      |
| rnd-6_family-7426-LTR-ERV1  |             |            |            | 1692       |            |            |            |      |
| Esox_lucius                 |             |            |            | 532        |            |            |            |      |
| Salmo_salar                 |             |            |            | 801        |            |            |            |      |
| Didelphidae                 |             |            |            | 642        |            |            |            |      |
| Latimeria_chalumnae         |             |            |            | 1766       |            |            |            |      |
| Monodelphis_domestica       |             |            |            | 543        |            |            |            |      |
| Macropus_eugenii            |             |            |            | 509        |            |            |            |      |
| Alligator_mississippiensis  |             |            |            | 566        |            |            |            |      |
| Chrysemys_picta_bellii      |             |            |            | 3578       |            |            |            |      |
| Danio_rerio                 |             |            |            | 699        |            |            |            |      |
| Taeniopygia                 |             |            |            | 538        |            |            |            |      |
| Dasybus_novemcinctus        |             |            |            | 512        |            |            |            |      |
| LTR_XT                      |             |            |            | 503        |            |            |            |      |
| Haplorrhini                 |             |            |            | 8801       |            |            |            |      |
| Catarrhini                  |             |            |            | 7847       |            |            |            |      |
| Anolis_carolinensis         |             |            |            | 1184       |            |            |            |      |
| Murine_leukemia_virus       |             |            |            | 7615       |            |            |            |      |
| Phascolarctos_cinereus      |             |            |            | 7426       |            |            |            |      |
| Estrildidae                 |             |            |            | 482        |            |            |            |      |
| Xenopus_Silurana_tropicalis |             |            |            | 812        |            |            |            |      |
| L_XT                        |             |            |            | 7509       |            |            |            |      |
| Takifugu_rubripes           |             |            |            | 707        |            |            |            |      |
| Bos_taurus                  |             |            |            | 533        |            |            |            |      |
| Homo_sapiens                |             |            |            | 450        |            |            |            |      |
| Microcebus_murinus          |             |            |            | 428        |            |            |            |      |
| Myotis_lucifugus            |             |            |            | 432        |            |            |            |      |
| Equus_caballus              |             |            |            | 450        |            |            |            |      |
| Tupaia_belangeri            |             |            |            | 498        |            |            |            |      |
| Loxodonta_africana          |             |            |            | 460        |            |            |            |      |
| Murinae                     |             |            |            | 489        |            |            |            |      |
| Canis_lupus_familiaris      |             |            |            | 536        |            |            |            |      |
| Sus_scrofa                  |             |            |            | 454        |            |            |            |      |
| Choloepus_hoffmanni         |             |            |            | 444        |            |            |            |      |
| Vicugna_pacos               |             |            |            | 474        |            |            |            |      |
| Gavialis_gangeticus         |             |            |            | 470        |            |            |            |      |
| Mammalia                    |             |            |            | 1337       |            |            |            |      |
| Passeroidea                 |             |            |            | 641        |            |            |            |      |
| Takifugu                    |             |            |            | 629        |            |            |            |      |
| Pteropus_vampyrus           |             |            |            | 472        |            |            |            |      |
| Ornithorhynchus             |             |            |            | 2785       |            |            |            |      |
| Oryctolagus_cuniculus       |             |            |            | 494        |            |            |            |      |
| Gallus_gallus               |             |            |            | 508        |            |            |            |      |
| Hominidae                   | CNNTGGNNNN  | NNNTGGNGGN | NNTCNCNNT  | NNNNNNNNNG | ATNNTCCCTT | TCNTNANCCC | NATNNTAATN | 7236 |
| Metatheria                  |             |            |            |            |            |            |            | 569  |
| Rodentia                    | TTTCTAACCA  | GACTTTAATC | AGTTGCTATT | ACAGGATTAC | CAGCCCCTAG | CTCTGAAGCC | AGAGG----C | 4817 |
| Monodelphis                 |             |            |            |            |            |            |            | 857  |
| Consensus                   |             |            |            |            |            |            |            |      |
| Conservation                | 100%<br>0%  |            |            |            |            |            |            |      |

|                             | 11,000     | 11,020     | 11,040     | 11,060     |             |            |            |      |  |
|-----------------------------|------------|------------|------------|------------|-------------|------------|------------|------|--|
| Dipodomys_ordii             |            |            |            |            | 597         |            |            |      |  |
| Laurasiatheria              |            |            |            |            | 361         |            |            |      |  |
| Eutheria                    |            |            |            |            | 452         |            |            |      |  |
| Tarsius_syrichtha           |            |            |            |            | 487         |            |            |      |  |
| Muridae                     | TAAGACCAGT | GGGGAA     |            |            | 5324        |            |            |      |  |
| Gasterosteus_aculeatus      |            |            |            |            | 2399        |            |            |      |  |
| Felis_silvestris            |            |            |            |            | 505         |            |            |      |  |
| Rattus                      |            |            |            |            | 589         |            |            |      |  |
| Papio_hamadryas             |            |            |            |            | 7392        |            |            |      |  |
| Pan_troglodytes             |            |            |            |            | 4138        |            |            |      |  |
| Ailuropoda_melanoleuca      |            |            |            |            | 462         |            |            |      |  |
| Cavia_porcellus             |            |            |            |            | 527         |            |            |      |  |
| Ictidomys_tridecemlineatus  |            |            |            |            | 530         |            |            |      |  |
| Canis                       |            |            |            |            | 479         |            |            |      |  |
| Felis_catus                 |            |            |            |            | 423         |            |            |      |  |
| Ochotona_princeps           |            |            |            |            | 515         |            |            |      |  |
| Cercopithecidae             |            |            |            |            | 2243        |            |            |      |  |
| Carnivora                   |            |            |            |            | 421         |            |            |      |  |
| Mus                         |            |            |            |            | 2488        |            |            |      |  |
| Mus_musculus                |            |            |            |            | 478         |            |            |      |  |
| Rattus_norvegicus           |            |            |            |            | 420         |            |            |      |  |
| Tursiops_truncatus          |            |            |            |            | 518         |            |            |      |  |
| Procavia_capensis           |            |            |            |            | 442         |            |            |      |  |
| Primates                    |            |            |            |            | 671         |            |            |      |  |
| Echinops_telfairi           |            |            |            |            | 473         |            |            |      |  |
| Sorex_araneus               |            |            |            |            | 494         |            |            |      |  |
| Canidae                     |            |            |            |            | 550         |            |            |      |  |
| Otolemur_garnettii          |            |            |            |            | 413         |            |            |      |  |
| Gallus                      |            |            |            |            | 633         |            |            |      |  |
| Callithrix_jacchus          |            |            |            |            | 495         |            |            |      |  |
| Crocodylus_porosus          |            |            |            |            | 527         |            |            |      |  |
| Erinaceus_europaeus         |            |            |            |            | 420         |            |            |      |  |
| rnd-6_family-7426-LTR-ERV1  |            |            |            |            | 1692        |            |            |      |  |
| Esox_lucius                 |            |            |            |            | 532         |            |            |      |  |
| Salmo_salar                 |            |            |            |            | 801         |            |            |      |  |
| Didelphidae                 |            |            |            |            | 642         |            |            |      |  |
| Latimeria_chalumnae         |            |            |            |            | 1766        |            |            |      |  |
| Monodelphis_domestica       |            |            |            |            | 543         |            |            |      |  |
| Macropus_eugenii            |            |            |            |            | 509         |            |            |      |  |
| Alligator_mississippiensis  |            |            |            |            | 566         |            |            |      |  |
| Chrysemys_picta_bellii      |            |            |            |            | 3578        |            |            |      |  |
| Danio_rerio                 |            |            |            |            | 699         |            |            |      |  |
| Taeniopygia                 |            |            |            |            | 538         |            |            |      |  |
| Dasybus_novemcinctus        |            |            |            |            | 512         |            |            |      |  |
| LTR_XT                      |            |            |            |            | 503         |            |            |      |  |
| Haplorrhini                 |            |            |            |            | 8801        |            |            |      |  |
| Catarrhini                  |            |            |            |            | 7847        |            |            |      |  |
| Anolis_carolinensis         |            |            |            |            | 1184        |            |            |      |  |
| Murine_leukemia_virus       |            |            |            |            | 7615        |            |            |      |  |
| Phascolarctos_cinereus      |            |            |            |            | 7426        |            |            |      |  |
| Estrildidae                 |            |            |            |            | 482         |            |            |      |  |
| Xenopus_Silurana_tropicalis |            |            |            |            | 812         |            |            |      |  |
| L_XT                        |            |            |            |            | 7509        |            |            |      |  |
| Takifugu_rubripes           |            |            |            |            | 707         |            |            |      |  |
| Bos_taurus                  |            |            |            |            | 533         |            |            |      |  |
| Homo_sapiens                |            |            |            |            | 450         |            |            |      |  |
| Microcebus_murinus          |            |            |            |            | 428         |            |            |      |  |
| Myotis_lucifugus            |            |            |            |            | 432         |            |            |      |  |
| Equus_caballus              |            |            |            |            | 450         |            |            |      |  |
| Tupaia_belangeri            |            |            |            |            | 498         |            |            |      |  |
| Loxodonta_africana          |            |            |            |            | 460         |            |            |      |  |
| Murinae                     |            |            |            |            | 489         |            |            |      |  |
| Canis_lupus_familiaris      |            |            |            |            | 536         |            |            |      |  |
| Sus_scrofa                  |            |            |            |            | 454         |            |            |      |  |
| Choloepus_hoffmanni         |            |            |            |            | 444         |            |            |      |  |
| Vicugna_pacos               |            |            |            |            | 474         |            |            |      |  |
| Gavialis_gangeticus         |            |            |            |            | 470         |            |            |      |  |
| Mammalia                    |            |            |            |            | 1337        |            |            |      |  |
| Passeroidea                 |            |            |            |            | 641         |            |            |      |  |
| Takifugu                    |            |            |            |            | 629         |            |            |      |  |
| Pteropus_vampyrus           |            |            |            |            | 472         |            |            |      |  |
| Ornithorhynchus             |            |            |            |            | 2785        |            |            |      |  |
| Oryctolagus_cuniculus       |            |            |            |            | 494         |            |            |      |  |
| Gallus_gallus               |            |            |            |            | 508         |            |            |      |  |
| Hominidae                   | NTNTGNNNTN | TANTNNNNNT | NGCCCNNTNN | NTNNTNNAGT | TNNTCNNTNNA | NCGNATNNNN | GAANTCNCCN | 7306 |  |
| Metatheria                  |            |            |            |            |             |            |            | 569  |  |
| Rodentia                    | CTGCAACTCC | CGATTATACC | CTGATGGTGA | AGATCGAACT | TGCCCAAGG   | ACTTCGACCC | ACAAGCAGCA | 4887 |  |
| Monodelphis                 |            |            |            |            |             |            |            | 857  |  |
| Consensus                   |            |            |            |            |             |            |            |      |  |
| Conservation                | 100%<br>0% |            |            |            |             |            |            |      |  |

|                             | 11,080     | 11,100     | 11,120     |            |            |            |            |      |  |
|-----------------------------|------------|------------|------------|------------|------------|------------|------------|------|--|
| Dipodomys_ordii             |            |            |            | 597        |            |            |            |      |  |
| Laurasiatheria              |            |            |            | 361        |            |            |            |      |  |
| Eutheria                    |            |            |            | 452        |            |            |            |      |  |
| Tarsius_syricta             |            |            |            | 487        |            |            |            |      |  |
| Muridae                     |            |            |            | 5324       |            |            |            |      |  |
| Gasterosteus_aculeatus      |            |            |            | 2399       |            |            |            |      |  |
| Felis_silvestris            |            |            |            | 505        |            |            |            |      |  |
| Rattus                      |            |            |            | 589        |            |            |            |      |  |
| Papio_hamadryas             |            |            |            | 7392       |            |            |            |      |  |
| Pan_troglodytes             |            |            |            | 4138       |            |            |            |      |  |
| Ailuropoda_melanoleuca      |            |            |            | 462        |            |            |            |      |  |
| Cavia_porcellus             |            |            |            | 527        |            |            |            |      |  |
| Ictidomys_tridecemlineatus  |            |            |            | 530        |            |            |            |      |  |
| Canis                       |            |            |            | 479        |            |            |            |      |  |
| Felis_catus                 |            |            |            | 423        |            |            |            |      |  |
| Ochotona_princeps           |            |            |            | 515        |            |            |            |      |  |
| Cercopithecidae             |            |            |            | 2243       |            |            |            |      |  |
| Carnivora                   |            |            |            | 421        |            |            |            |      |  |
| Mus                         |            |            |            | 2488       |            |            |            |      |  |
| Mus_musculus                |            |            |            | 478        |            |            |            |      |  |
| Rattus_norvegicus           |            |            |            | 420        |            |            |            |      |  |
| Tursiops_truncatus          |            |            |            | 518        |            |            |            |      |  |
| Procavia_capensis           |            |            |            | 442        |            |            |            |      |  |
| Primates                    |            |            |            | 671        |            |            |            |      |  |
| Echinops_telfairi           |            |            |            | 473        |            |            |            |      |  |
| Sorex_araneus               |            |            |            | 494        |            |            |            |      |  |
| Canidae                     |            |            |            | 550        |            |            |            |      |  |
| Otolemur_garnettii          |            |            |            | 413        |            |            |            |      |  |
| Gallus                      |            |            |            | 633        |            |            |            |      |  |
| Callithrix_jacchus          |            |            |            | 495        |            |            |            |      |  |
| Crocodylus_porosus          |            |            |            | 527        |            |            |            |      |  |
| Erinaceus_europaeus         |            |            |            | 420        |            |            |            |      |  |
| rnd-6_family-7426-LTR-ERV1  |            |            |            | 1692       |            |            |            |      |  |
| Esox_lucius                 |            |            |            | 532        |            |            |            |      |  |
| Salmo_salar                 |            |            |            | 801        |            |            |            |      |  |
| Didelphidae                 |            |            |            | 642        |            |            |            |      |  |
| Latimeria_chalumnae         |            |            |            | 1766       |            |            |            |      |  |
| Monodelphis_domestica       |            |            |            | 543        |            |            |            |      |  |
| Macropus_eugenii            |            |            |            | 509        |            |            |            |      |  |
| Alligator_mississippiensis  |            |            |            | 566        |            |            |            |      |  |
| Chrysemys_picta_bellii      |            |            |            | 3578       |            |            |            |      |  |
| Danio_rerio                 |            |            |            | 699        |            |            |            |      |  |
| Taeniopygia                 |            |            |            | 538        |            |            |            |      |  |
| Dasybus_novemcinctus        |            |            |            | 512        |            |            |            |      |  |
| LTR_XT                      |            |            |            | 503        |            |            |            |      |  |
| Haplorrhini                 |            |            |            | 8801       |            |            |            |      |  |
| Catarrhini                  |            |            |            | 7847       |            |            |            |      |  |
| Anolis_carolinensis         |            |            |            | 1184       |            |            |            |      |  |
| Murine_leukemia_virus       |            |            |            | 7615       |            |            |            |      |  |
| Phascolarctos_cinereus      |            |            |            | 7426       |            |            |            |      |  |
| Estrildidae                 |            |            |            | 482        |            |            |            |      |  |
| Xenopus_Silurana_tropicalis |            |            |            | 812        |            |            |            |      |  |
| L_XT                        |            |            |            | 7509       |            |            |            |      |  |
| Takifugu_rubripes           |            |            |            | 707        |            |            |            |      |  |
| Bos_taurus                  |            |            |            | 533        |            |            |            |      |  |
| Homo_sapiens                |            |            |            | 450        |            |            |            |      |  |
| Microcebus_murinus          |            |            |            | 428        |            |            |            |      |  |
| Myotis_lucifugus            |            |            |            | 432        |            |            |            |      |  |
| Equus_caballus              |            |            |            | 450        |            |            |            |      |  |
| Tupaia_belangeri            |            |            |            | 498        |            |            |            |      |  |
| Loxodonta_africana          |            |            |            | 460        |            |            |            |      |  |
| Murinae                     |            |            |            | 489        |            |            |            |      |  |
| Canis_lupus_familiaris      |            |            |            | 536        |            |            |            |      |  |
| Sus_scrofa                  |            |            |            | 454        |            |            |            |      |  |
| Choloepus_hoffmanni         |            |            |            | 444        |            |            |            |      |  |
| Vicugna_pacos               |            |            |            | 474        |            |            |            |      |  |
| Gavialis_gangeticus         |            |            |            | 470        |            |            |            |      |  |
| Mammalia                    |            |            |            | 1337       |            |            |            |      |  |
| Passeroidea                 |            |            |            | 641        |            |            |            |      |  |
| Takifugu                    |            |            |            | 629        |            |            |            |      |  |
| Pteropus_vampyrus           |            |            |            | 472        |            |            |            |      |  |
| Ornithorhynchus             |            |            |            | 2785       |            |            |            |      |  |
| Oryctolagus_cuniculus       |            |            |            | 494        |            |            |            |      |  |
| Gallus_gallus               |            |            |            | 508        |            |            |            |      |  |
| Hominidae                   | GGGTNNCNT  | CAACCANATG | TTACTNCACC | CNTACNNCCN | NCTNCCNACC | TCNGATTTAG | NCCNCCNNCC | 7376 |  |
| Metatheria                  |            |            |            |            |            |            |            | 569  |  |
| Rodentia                    | GGAGTGGGA  | CCTCTACGCC | CACATTCAGC | AGGANGTAGT | CTAATGATAA | CGTTGCCCCC | TTTCCCGGCC | 4957 |  |
| Monodelphis                 |            |            |            |            |            |            |            | 857  |  |
| Consensus                   |            |            |            |            |            |            |            |      |  |
| Conservation                | 100%<br>0% |            |            |            |            |            |            |      |  |

|                             | 11,140     | 11,160     | 11,180     | 11,200     |           |            |            |      |
|-----------------------------|------------|------------|------------|------------|-----------|------------|------------|------|
| Dipodomys_ordii             |            |            |            |            | 597       |            |            |      |
| Laurasiatheria              |            |            |            |            | 361       |            |            |      |
| Eutheria                    |            |            |            |            | 452       |            |            |      |
| Tarsius_syricha             |            |            |            |            | 487       |            |            |      |
| Muridae                     |            |            |            |            | 5324      |            |            |      |
| Gasterosteus_aculeatus      |            |            |            |            | 2399      |            |            |      |
| Felis_silvestris            |            |            |            |            | 505       |            |            |      |
| Rattus                      |            |            |            |            | 589       |            |            |      |
| Papio_hamadryas             |            |            |            |            | 7392      |            |            |      |
| Pan_troglodytes             |            |            |            |            | 4138      |            |            |      |
| Ailuropoda_melanoleuca      |            |            |            |            | 462       |            |            |      |
| Cavia_porcellus             |            |            |            |            | 527       |            |            |      |
| Ictidomys_tridecemlineatus  |            |            |            |            | 530       |            |            |      |
| Canis                       |            |            |            |            | 479       |            |            |      |
| Felis_catus                 |            |            |            |            | 423       |            |            |      |
| Ochotona_princeps           |            |            |            |            | 515       |            |            |      |
| Cercopithecidae             |            |            |            |            | 2243      |            |            |      |
| Carnivora                   |            |            |            |            | 421       |            |            |      |
| Mus                         |            |            |            |            | 2488      |            |            |      |
| Mus_musculus                |            |            |            |            | 478       |            |            |      |
| Rattus_norvegicus           |            |            |            |            | 420       |            |            |      |
| Tursiops_truncatus          |            |            |            |            | 518       |            |            |      |
| Procavia_capensis           |            |            |            |            | 442       |            |            |      |
| Primates                    |            |            |            |            | 671       |            |            |      |
| Echinops_telfairi           |            |            |            |            | 473       |            |            |      |
| Sorex_araneus               |            |            |            |            | 494       |            |            |      |
| Canidae                     |            |            |            |            | 550       |            |            |      |
| Otolemur_garnettii          |            |            |            |            | 413       |            |            |      |
| Gallus                      |            |            |            |            | 633       |            |            |      |
| Callithrix_jacchus          |            |            |            |            | 495       |            |            |      |
| Crocodylus_porosus          |            |            |            |            | 527       |            |            |      |
| Erinaceus_europaeus         |            |            |            |            | 420       |            |            |      |
| rnd-6_family-7426-LTR-ERV1  |            |            |            |            | 1692      |            |            |      |
| Esox_lucius                 |            |            |            |            | 532       |            |            |      |
| Salmo_salar                 |            |            |            |            | 801       |            |            |      |
| Didelphidae                 |            |            |            |            | 642       |            |            |      |
| Latimeria_chalumnae         |            |            |            |            | 1766      |            |            |      |
| Monodelphis_domestica       |            |            |            |            | 543       |            |            |      |
| Macropus_eugenii            |            |            |            |            | 509       |            |            |      |
| Alligator_mississippiensis  |            |            |            |            | 566       |            |            |      |
| Chrysemys_picta_bellii      |            |            |            |            | 3578      |            |            |      |
| Danio_rerio                 |            |            |            |            | 699       |            |            |      |
| Taeniopygia                 |            |            |            |            | 538       |            |            |      |
| Dasybus_novemcinctus        |            |            |            |            | 512       |            |            |      |
| LTR_XT                      |            |            |            |            | 503       |            |            |      |
| Haplorrhini                 |            |            |            |            | 8801      |            |            |      |
| Catarrhini                  |            |            |            |            | 7847      |            |            |      |
| Anolis_carolinensis         |            |            |            |            | 1184      |            |            |      |
| Murine_leukemia_virus       |            |            |            |            | 7615      |            |            |      |
| Phascolarctos_cinereus      |            |            |            |            | 7426      |            |            |      |
| Estrildidae                 |            |            |            |            | 482       |            |            |      |
| Xenopus_Silurana_tropicalis |            |            |            |            | 812       |            |            |      |
| L_XT                        |            |            |            |            | 7509      |            |            |      |
| Takifugu_rubripes           |            |            |            |            | 707       |            |            |      |
| Bos_taurus                  |            |            |            |            | 533       |            |            |      |
| Homo_sapiens                |            |            |            |            | 450       |            |            |      |
| Microcebus_murinus          |            |            |            |            | 428       |            |            |      |
| Myotis_lucifugus            |            |            |            |            | 432       |            |            |      |
| Equus_caballus              |            |            |            |            | 450       |            |            |      |
| Tupaia_belangeri            |            |            |            |            | 498       |            |            |      |
| Loxodonta_africana          |            |            |            |            | 460       |            |            |      |
| Murinae                     |            |            |            |            | 489       |            |            |      |
| Canis_lupus_familiaris      |            |            |            |            | 536       |            |            |      |
| Sus_scrofa                  |            |            |            |            | 454       |            |            |      |
| Choloepus_hoffmanni         |            |            |            |            | 444       |            |            |      |
| Vicugna_pacos               |            |            |            |            | 474       |            |            |      |
| Gavialis_gangeticus         |            |            |            |            | 470       |            |            |      |
| Mammalia                    |            |            |            |            | 1337      |            |            |      |
| Passeroidea                 |            |            |            |            | 641       |            |            |      |
| Takifugu                    |            |            |            |            | 629       |            |            |      |
| Pteropus_vampyrus           |            |            |            |            | 472       |            |            |      |
| Ornithorhynchus             |            |            |            |            | 2785      |            |            |      |
| Oryctolagus_cuniculus       |            |            |            |            | 494       |            |            |      |
| Gallus_gallus               |            |            |            |            | 508       |            |            |      |
| Hominidae                   | CNACGACGCC | CNNNNNCAGC | AGGAAGNAGC | CAGANGATTN | CGTCGCCCT | TTTNNNTAAC | CANNANGAGG | 7446 |
| Metatheria                  |            |            |            |            |           |            |            | 569  |
| Rodentia                    | CCTGACTGTT | TATCAATAGT | AAACAAAAGG | GGNGGGGGG  |           |            |            | 4997 |
| Monodelphis                 |            |            |            |            |           |            |            | 857  |
| Consensus                   |            |            |            |            |           |            |            |      |
| Conservation                | 100%<br>0% |            |            |            |           |            |            |      |

|                             |                                                                                     |      |
|-----------------------------|-------------------------------------------------------------------------------------|------|
| Dipodomys_ordii             | -----                                                                               | 597  |
| Laurasiatheria              | -----                                                                               | 361  |
| Eutheria                    | -----                                                                               | 452  |
| Tarsius_syrichta            | -----                                                                               | 487  |
| Muridae                     | -----                                                                               | 5324 |
| Gasterosteus_aculeatus      | -----                                                                               | 2399 |
| Felis_silvestris            | -----                                                                               | 505  |
| Rattus                      | -----                                                                               | 589  |
| Papio_hamadryas             | -----                                                                               | 7392 |
| Pan_troglodytes             | -----                                                                               | 4138 |
| Ailuropoda_melanoleuca      | -----                                                                               | 462  |
| Cavia_porcellus             | -----                                                                               | 527  |
| Ictidomys_tridecemlineatus  | -----                                                                               | 530  |
| Canis                       | -----                                                                               | 479  |
| Felis_catus                 | -----                                                                               | 423  |
| Ochotona_princeps           | -----                                                                               | 515  |
| Cercopithecidae             | -----                                                                               | 2243 |
| Carnivora                   | -----                                                                               | 421  |
| Mus                         | -----                                                                               | 2488 |
| Mus_musculus                | -----                                                                               | 478  |
| Rattus_norvegicus           | -----                                                                               | 420  |
| Tursiops_truncatus          | -----                                                                               | 518  |
| Procavia_capensis           | -----                                                                               | 442  |
| Primates                    | -----                                                                               | 671  |
| Echinops_telfairi           | -----                                                                               | 473  |
| Sorex_araneus               | -----                                                                               | 494  |
| Canidae                     | -----                                                                               | 550  |
| Otolemur_garnettii          | -----                                                                               | 413  |
| Gallus                      | -----                                                                               | 633  |
| Callithrix_jacchus          | -----                                                                               | 495  |
| Crocodylus_porosus          | -----                                                                               | 527  |
| Erinaceus_europaeus         | -----                                                                               | 420  |
| rnd-6_family-7426-LTR-ERV1  | -----                                                                               | 1692 |
| Esox_lucius                 | -----                                                                               | 532  |
| Salmo_salar                 | -----                                                                               | 801  |
| Didelphidae                 | -----                                                                               | 642  |
| Latimeria_chalumnae         | -----                                                                               | 1766 |
| Monodelphis_domestica       | -----                                                                               | 543  |
| Macropus_eugenii            | -----                                                                               | 509  |
| Alligator_mississippiensis  | -----                                                                               | 566  |
| Chrysemys_picta_bellii      | -----                                                                               | 3578 |
| Danio_rerio                 | -----                                                                               | 699  |
| Taeniopygia                 | -----                                                                               | 538  |
| Dasypus_novemcinctus        | -----                                                                               | 512  |
| LTR_XT                      | -----                                                                               | 503  |
| Haplorrhini                 | -----                                                                               | 8801 |
| Catarrhini                  | -----                                                                               | 7847 |
| Anolis_carolinensis         | -----                                                                               | 1184 |
| Murine_leukemia_virus       | -----                                                                               | 7615 |
| Phascolarctos_cinereus      | -----                                                                               | 7426 |
| Estrildidae                 | -----                                                                               | 482  |
| Xenopus_Silurana_tropicalis | -----                                                                               | 812  |
| I_XT                        | -----                                                                               | 7509 |
| Takifugu_rubripes           | -----                                                                               | 707  |
| Bos_taurus                  | -----                                                                               | 533  |
| Homo_sapiens                | -----                                                                               | 450  |
| Microcebus_murinus          | -----                                                                               | 428  |
| Myotis_lucifugus            | -----                                                                               | 432  |
| Equus_caballus              | -----                                                                               | 450  |
| Tupaia_belangeri            | -----                                                                               | 498  |
| Loxodonta_africana          | -----                                                                               | 460  |
| Murinae                     | -----                                                                               | 489  |
| Canis_lupus_familiaris      | -----                                                                               | 536  |
| Sus_scrofa                  | -----                                                                               | 454  |
| Choloepus_hoffmanni         | -----                                                                               | 444  |
| Vicugna_pacos               | -----                                                                               | 474  |
| Gavialis_gangeticus         | -----                                                                               | 470  |
| Mammalia                    | -----                                                                               | 1337 |
| Passeroidea                 | -----                                                                               | 641  |
| Takifugu                    | -----                                                                               | 629  |
| Pteropus_vampyrus           | -----                                                                               | 472  |
| Ornithorhynchus             | -----                                                                               | 2785 |
| Oryctolagus_cuniculus       | -----                                                                               | 494  |
| Gallus_gallus               | -----                                                                               | 508  |
| Hominidae                   | TNGGAN                                                                              | 7452 |
| Metatheria                  | -----                                                                               | 569  |
| Rodentia                    | -----                                                                               | 4997 |
| Monodelphis                 | -----                                                                               | 857  |
| Consensus                   | -----                                                                               |      |
| Conservation                |  |      |
