# Supplementary material for: A Deluge of Complex Repeats: The Solanum Genome
Source: PLoS One. 2015 Aug 4;10(8):e0133962. doi: 10.1371/journal.pone.0133962 (PMC4524691; doi:10.1371/journal.pone.0133962)
Supplement: S11 Table — (XLS) [file pone.0133962.s017.xls]

## Sheet: Sheet1
Experimental conditions
Solanum tuberosum
Name	Condition_name	SRA Accession
Condition_1	PE_P_Q_[Stolons_(above_&_below_ground)_[paired_ends]]	SRR122108
Condition_2	PE_BV_P_S_[Tubers_(Whole,_Sample_2)_[paired_ends]]	SRR122109
Condition_3	STD_AH_[Inside_of_fruit_(mesocarp_&_endocarp)]	SRR122110
Condition_4	BV_P_X_[Stamens]	SRR122111
Condition_5	BV_P_I_[Control_(35C_treatment,_Whole_Plant_in_vitro,_Media_A)]	SRR122112
Condition_6	PE_BV_P_P_[Callus_[paired_ends]]	SRR122113
Condition_7	BV_P_S_[Tubers_(Whole,_Sample_2)]	SRR122114
Condition_8	BV_K_[Heat_-_24hr,_35C]	SRR122115
Condition_9	STD_AB_[P._infestans_Infected_Leaves_(24hr/48hr/72hr)]	SRR122116
Condition_10	BV_P_F_[IAA_-_24hr,_10uM]	SRR122117
Condition_11	BV_N_[Roots_(in_vitro,_Media_B)]	SRR122118
Condition_12	BV_P_G_[GA3_-_24hr,_50uM]	SRR122119
Condition_13	BV_B_[Salt_-_150mM_NaCl,_24hr]	SRR122120
Condition_14	BV_P_V_[Sepals]	SRR122121
Condition_15	PE_P_N_[Roots_(in_vitro,_Media_B)]	SRR122122
Condition_16	BV_P_P_[Callus_(10_&_11_wks_old,_Leaves_&_Stems,_in_vitro,_Media_D)]	SRR122123
Condition_17	PE_P_T_[Whole_Mature_Flowers_[paired_ends]]	SRR122124
Condition_18	STD_AC_[BABA_Treated_Leaves_(24hr/48hr/72hr)]	SRR122125
Condition_19	BV_D_[Control_(IAA;_GA3;_BAP;_ABA,_Whole_Plant_in_vitro,_Media_C)]	SRR122126
Condition_20	STD_AF_[Immature_whole_fruit]	SRR122127
Condition_21	BV_P_C_[Mannitol_-_260uM,_24hr]	SRR122128
Condition_22	PE_BV_P_M_[Leaves_-_Wounding_Secondary_Tissue_[paired_ends]]	SRR122129
Condition_23	BV_U_[Petioles]	SRR122130
Condition_24	BV_A_[Control_(Salt;_Mannitol,_Whole_Plant_in_vitro,_Media_B)]	SRR122131
Condition_25	STD_AE_[Mature_whole_fruit]	SRR122132
Condition_26	PE_BV_P_I_[Control_[paired_ends]]	SRR122133
Condition_27	BV_P_M_[Leaves_-_Wounding_Secondary_Tissue]	SRR122134
Condition_28	STD_AD_[BTH_Treated_Leaves_(24hr/48hr/72hr)]	SRR122135
Condition_29	BV_P_R_[Tubers_(Whole,_Sample_1)]	SRR122136
Condition_30	BV_Y_[Carpels]	SRR122137
Condition_31	BV_P_E_[ABA_-_24hr,_50uM]	SRR122138
Condition_32	PE_P_U_[Petioles_[paired_ends]]	SRR122139
Condition_33	STD_AA_[Control_(Biotic_Stress)]	SRR122140
Condition_34	BV_H_[BAP_-_24hr,_10uM]	SRR124121
Condition_35	BV_L_[Leaves]	SRR124126
Condition_36	BV_O [Shoots (in vitro, Media B)]	SRR124127
Condition_37	BV_Q_[Stolons_(above_&_below_ground)]	SRR124130
Condition_38	BV_T_[Whole_Mature_Flowers]	SRR124131
Condition_39	BV_W_[Petals]	SRR124132
Condition_40	BV_Z_[Leaves_-_Wounding_Primary_Tissue]	SRR124138
Solanum lycopersicum
Name	Condition_name	SRA Accession
Condition_1	FL7600	SRR389807
Condition_2	NC84173	SRR390315
Condition_3	OH9242	SRR390329
Condition_4	T5	SRR390331
Condition_5	PI114490	SRR390336
Condition_6	seedling_HRFR	SRR786602
Condition_7	seedling_HRFR	SRR786603
Condition_8	seedling_HRFR	SRR786604
Condition_9	seedling_LRFR	SRR786605
Condition_10	seedling_LRFR	SRR786606
Condition_11	FL7600 PE	SRR389806
Condition_12	NC84173 PE	SRR389808
Condition_13	OH9242 PE	SRR390328
Condition_14	T5 PE	SRR390330
Condition_15	PI114490 PE	SRR390335
Condition_16	seedling_HRFR_PE	SRR786507
Condition_17	seedling_LRFR_PE	SRR786508
Condition_18	seedling_LRFR_PE	SRR786509
Condition_19	floral_HRFR_PE	SRR786520
Condition_20	floral_HRFR_PE	SRR786521
Condition_21	fruit_HRFR_PE	SRR786522
Condition_22	fruit_HRFR_PE	SRR786523
Condition_23	leaf_HRFR_PE	SRR786524
Condition_24	leaf_HRFR_PE	SRR786525
Condition_25	root_HRFR_PE	SRR786526
Condition_26	root_HRFR_PE	SRR786527
Condition_27	root_HRFR_PE	SRR786528
Condition_28	seedling_HRFR_PE	SRR786529
Condition_29	seedling_HRFR_PE	SRR786530
Condition_30	stem_HRFR_PE	SRR786531
Condition_31	stem_HRFR_PE	SRR786532
Condition_32	vegetative_HRFR_PE	SRR786533
Condition_33	vegetative_HRFR_PE	SRR786534
Condition_34	floral_LRFR_PE	SRR786535
Condition_35	floral_LRFR_PE	SRR786536
Condition_36	floral_LRFR_PE	SRR786537
Condition_37	fruit_LRFR_PE	SRR786538
Condition_38	fruit_LRFR_PE	SRR786539
Condition_39	leaf_LRFR_PE	SRR786540
Condition_40	leaf_LRFR_PE	SRR786541
Condition_41	leaf_LRFR_PE	SRR786542
Condition_42	root_LRFR_PE	SRR786543
Condition_43	root_LRFR_PE	SRR786544
Condition_44	seedling_LRFR_PE	SRR786545
Condition_45	seedling_LRFR_PE	SRR786546
Condition_46	stem_LRFR_PE	SRR786547
Condition_47	stem_LRFR_PE	SRR786548
Condition_48	vegetative_LRFR_PE	SRR786549
Condition_49	vegetative_LRFR_PE	SRR786550
Condition_50	vegetative_LRFR_PE	SRR786551
Condition_51	ABA treated tomato (1d)	SRR926182
Condition_52	control tomato	SRR926185
Condition_53	control tomato sample (2d)	SRR948545
Condition_54	ABA treated tomato sample (2d)	SRR948546
Condition_55	control tomato sample (0d)	SRR949057
